# Supplementary material for: 2-(Chlorodiisopropylsilyl)-6-(trimethylsilyl)phenyl triflate: a modified platform for intramolecular benzyne cycloadditions
Source: Royal Society of Chemistry journal article supplement (doi:10.1039/d1cc05264k), 2021-01-01

Electronic Supplementary Information (ESI)

**2-(Chlorodiisopropylsilyl)-6-(trimethylsilyl)phenyl triflate:  
a modified platform for intramolecular benzyne cycloadditions**

Tsukasa Tawatari, Kiyosei Takasu\* and Hiroshi Takikawa\*

Graduate School of Pharmaceutical Sciences, Kyoto University  
Yoshida, Sakyo-ku, Kyoto 606-8501, Japan

htakikawa@pharm.kyoto-u.ac.jp

**Table of contents**

1. General experimental procedure
  2. Experimental procedure and characterization data
    - 2-1. Preparation of cycloaddition precursors
    - 2-2. Synthesis of cycloadducts
    - 2-3. Pd-catalyzed (2+2+2) reaction and protodesilylation
  3. References
- <sup>1</sup>H and <sup>13</sup>C NMR spectra

## 1. General experimental procedure

All non-aqueous reactions were carried out in dried glassware under an atmosphere of dry argon unless otherwise noted. THF, Et<sub>2</sub>O, toluene and CH<sub>2</sub>Cl<sub>2</sub> (anhydrous; Kanto Chemical Co., Inc.) were used as receive. CH<sub>3</sub>CN was distilled prior to use according to the standard protocols. KF, CsF, 18-crown-6, Cs<sub>2</sub>CO<sub>3</sub>, and K<sub>2</sub>CO<sub>3</sub> were dried with heating under reduced pressure prior to use. The other reagents were purchased and used without further purifications. Analytical TLC was performed on pre-coated silica gel plate (Wako Silicagel 70 F254). Flash column chromatography was performed on Wakogel 60N. Preparative thin-layer chromatography (PTLC) was performed using plates prepared from Wakogel<sup>®</sup> B5-F. HPLC was performed on a YMC LC-forte/R using YMC-GPC T4000<sup>®</sup> and YMC-GPC T2000<sup>®</sup> columns. Melting points (mp) were determined on YANACO micro melting point apparatus. <sup>1</sup>H and <sup>13</sup>C NMR spectra were recorded on a JEOL JNM-LA 500 or a JEOL JNM ECZ 600R in the solvent indicated; Chemical shifts (δ) are expressed in parts per million (ppm), and coupling constants are reported as hertz (Hz). Tetramethylsilane (δ 0.00 ppm) was used as an internal standard for <sup>1</sup>H NMR. Chloroform-D (δ 77.0 ppm) was used as an internal standard for <sup>13</sup>C NMR. Multiplicities are indicated as s (singlet), d (doublet), t (triplet), q (quartet), m (multiplet) and br (broad). Attenuated total reflectance Fourier transform infrared (ATR-IR) spectra were recorded on a Shimadzu IRAffinity-1 with a ATR measurement attachment (MIRacle 10), and the wave numbers of maximum absorption peaks are reported in cm<sup>-1</sup>. High-resolution mass spectra (HRMS) were recorded on a JEOL MS700 spectrometer for FAB mass spectrometry or a SHIMADZU LCMS-IT-TOF for ESI mass spectrometry.

## 2. Experimental procedure and characterization data

### 2-1. Preparation of cycloaddition precursors

#### Synthesis of phenol **3a**

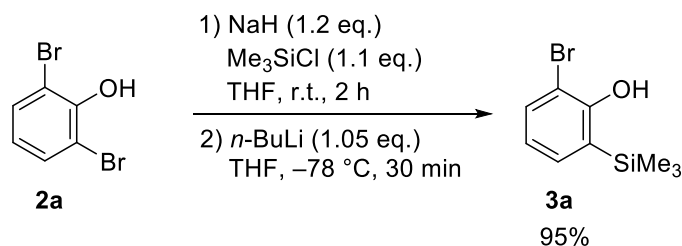

To a solution of 2,6-dibromophenol (**2a**) (7.60 g, 30.2 mmol) in THF (90 mL) was added NaH (60% dispersion in mineral oil, 1.45 g, 36.2 mmol) at 0 °C. After stirring for 30 min at this temperature, Me<sub>3</sub>SiCl (4.19 mL, 33.2 mmol) was added dropwise and the mixture was stirred for 2 h at room temperature. The reaction mixture was cooled to -78 °C, to which was added dropwise a solution of *n*-BuLi (1.60 M) in hexane (19.8 mL, 31.7 mmol) over 5 min. After stirring for 30 min at -78 °C, the reaction was quenched by adding saturated aqueous NH<sub>4</sub>Cl, and the mixture was extracted with EtOAc (x3). The combined organic layer was washed with brine, dried (Na<sub>2</sub>SO<sub>4</sub>), and concentrated in vacuo. The residue was purified by flash column chromatography (silica gel, hexane) to afford phenol **3a** (6.99 g, 95%) as colorless oil.

**3a**: *R*<sub>f</sub> 0.44 (hexane); Spectral data matched those reported in the literature.<sup>1</sup>

#### Synthesis of phenol **4a**

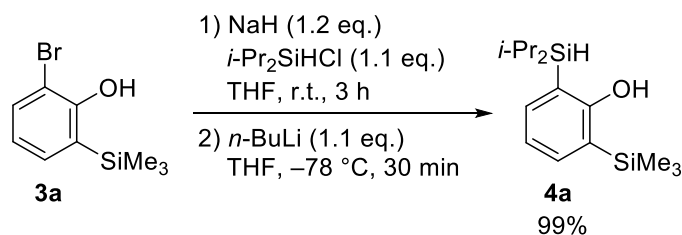

To a solution of **3a** (6.99 g, 28.6 mmol) in THF (85 mL) was added NaH (60% dispersion in mineral oil, 1.37 g, 34.3 mmol) at 0 °C. After stirring for 30 min at this temperature, *i*-Pr<sub>2</sub>SiHCl (5.33 mL, 31.5 mmol) was added, and the mixture was stirred for 3 h at room temperature. The reaction mixture was cooled to -78 °C, to which was added dropwise a solution of *n*-BuLi (1.60 M) in hexane (19.7 mL, 31.5 mmol) over 5 min. After stirring for 30 min at -78 °C, the reaction was quenched by adding saturated aqueous NH<sub>4</sub>Cl, and the mixture was extracted with EtOAc (x3). The combined organic layer was washed with brine, dried (Na<sub>2</sub>SO<sub>4</sub>), and concentrated in vacuo. The residue was purified by flash column chromatography (silica gel, hexane) to afford phenol **4a** (8.03 g, 99%) as colorless oil.

**4a**: *R*<sub>f</sub> 0.52 (hexane); <sup>1</sup>H NMR (500 MHz, CDCl<sub>3</sub>): δ 0.30 (s, 9H), 1.00 (d, 6H, *J* = 7.5 Hz), 1.10 (d, 6H, *J* =

7.5 Hz), 1.29 (qqd, 2H,  $J = 7.5, 7.5, 3.4$  Hz), 4.13 (t, 1H,  $J = 3.4$  Hz), 5.50 (s, 1H), 6.92 (dd, 1H,  $J = 7.5, 7.2$  Hz), 7.31 (dd, 1H,  $J = 7.5, 1.7$  Hz), 7.40 (dd, 1H,  $J = 7.2, 1.7$  Hz);  $^{13}\text{C}$  NMR (125 MHz,  $\text{CDCl}_3$ ):  $\delta$  -1.4, 10.3, 18.1, 18.4, 116.8, 120.2, 125.0, 137.4, 137.6, 166.2; IR (neat): 3549, 2951, 2866, 2059, 1392, 906, 840, 732  $\text{cm}^{-1}$ ; HRMS (ESI): calcd. for  $\text{C}_{15}\text{H}_{27}\text{OSi}_2$   $[\text{M}-\text{H}]^-$ : 279.1606; found: 279.1602.

#### Synthesis of triflate **5a**

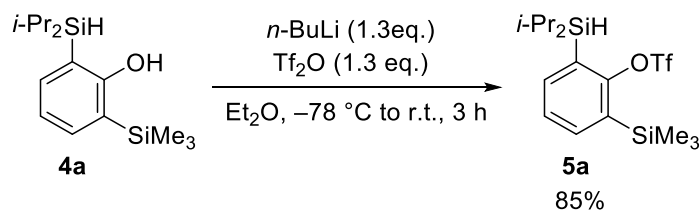

To a solution of **4a** (17.5 g, 62.5 mmol) in  $\text{Et}_2\text{O}$  (400 mL) was added was added  $n\text{-BuLi}$  (2.3 M) in hexane (35.3 mL, 81.3 mmol) at  $-78$  °C. After stirring for 30 min at this temperature,  $\text{Tf}_2\text{O}$  (13.7 mL, 81.3 mmol) was added dropwise to the mixture. The mixture was warmed to room temperature, and the stirring was continued for 3 h. The reaction was quenched by adding saturated aqueous  $\text{NaHCO}_3$ , and the mixture was extracted with  $\text{EtOAc}$  (x3). The combined organic layer was washed with brine, dried ( $\text{Na}_2\text{SO}_4$ ), and concentrated in vacuo. The residue was purified by flash column chromatography (silica gel, hexane) to afford triflate **5a** (22.0 g, 85%) as colorless oil.

**5a**:  $R_f$  0.50 (hexane);  $^1\text{H}$  NMR (500 MHz,  $\text{CDCl}_3$ ):  $\delta$  0.37 (s, 9H), 0.95 (d, 6H,  $J = 7.5$  Hz), 1.06 (d, 6H,  $J = 7.5$  Hz), 1.21–1.29 (m, 2H), 4.19–4.21 (m, 1H), 7.36 (dd, 1H,  $J = 7.2, 7.2$  Hz), 7.49 (dd, 1H,  $J = 7.2, 1.5$  Hz), 7.61 (dd, 1H,  $J = 7.2, 1.5$  Hz);  $^{13}\text{C}$  NMR (125 MHz,  $\text{CDCl}_3$ ):  $\delta$  -0.2, 10.5, 18.2, 118.8 (q,  $J_{\text{CF}} = 320$  Hz), 127.5, 130.4, 135.3, 138.0, 138.7, 156.3; IR (neat): 2954, 2866, 2179, 1400, 1219, 1138, 910, 875, 848, 736  $\text{cm}^{-1}$ ; HRMS (ESI): calcd. for  $\text{C}_{16}\text{H}_{26}\text{F}_3\text{O}_3\text{Si}_2$   $[\text{M}-\text{H}]^-$ : 411.1099; found: 411.1087.

#### Synthesis of silyl chloride **1a**

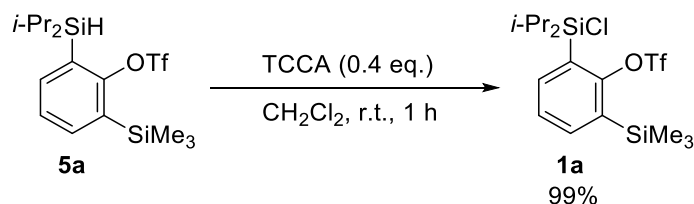

To a solution of **5a** (22.0 g, 53.3 mmol) in  $\text{CH}_2\text{Cl}_2$  (400 mL) was added trichloroisocyanuric acid<sup>2</sup> (TCCA, 4.95 g, 21.3 mmol). After stirring for 1 h at room temperature, the reaction mixture was filtered through a Celite<sup>®</sup> pad (washed with hexane). The filtrate was concentrated in vacuo to afford silyl chloride **1a** (23.7 g, 99%) as colorless oil, which solidified at 5 °C to give colorless crystals.

**1a**: mp: 45–51 °C;  $^1\text{H}$  NMR (500 MHz,  $\text{CDCl}_3$ ):  $\delta$  0.36 (s, 9H), 0.97 (d, 6H,  $J = 7.5$  Hz), 1.18 (d, 6H,  $J = 7.2$  Hz), 1.64 (qq, 2H,  $J = 7.5, 7.2$  Hz), 7.43 (dd, 1H,  $J = 7.5, 7.5$  Hz), 7.66 (dd, 1H,  $J = 7.5, 2.0$  Hz), 7.88 (dd, 1H,  $J = 7.5, 2.0$  Hz);  $^{13}\text{C}$  NMR (125 MHz,  $\text{CDCl}_3$ ):  $\delta$  0.2, 15.1, 17.9, 118.4 (q,  $J_{\text{CF}} = 318$  Hz), 127.4, 128.9, 135.0, 139.4, 140.4, 153.9; IR (neat): 2954, 2870, 2252, 1396, 1219, 906, 729  $\text{cm}^{-1}$ ; HRMS (FAB):

calcd. for  $C_{16}H_{27}ClF_3O_3SSi_2$   $[M+H]^+$ : 447.0855; found: 447.0849.

### Synthesis of silyl ether **7a**

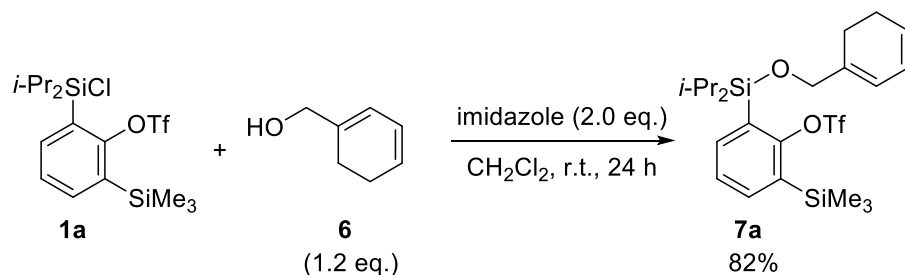

To a solution of **1a** (1.88 g, 4.20 mmol) in  $\text{CH}_2\text{Cl}_2$  (42 mL) were added imidazole (572 mg, 8.40 mmol) and alcohol **6**<sup>3</sup> (555 mg, 5.04 mmol) at 0 °C. After stirring for 24 h at room temperature, the reaction was quenched by adding saturated aqueous  $\text{NaHCO}_3$ , and the mixture was extracted with  $\text{CHCl}_3$  (x3). The combined organic layer was washed with brine, dried ( $\text{Na}_2\text{SO}_4$ ), and concentrated in vacuo. The residue was purified by flash column chromatography (silica gel, EtOAc/hexane = 1/50) to afford silyl ether **7a** (1.80 g, 82%) as colorless oil.

**7a**:  $R_f$  0.48 (EtOAc/hexane = 1/10);  $^1\text{H NMR}$  (600 MHz,  $\text{CDCl}_3$ ):  $\delta$  0.36 (s, 9H), 1.01 (d, 6H,  $J = 7.6$  Hz), 1.15 (d, 6H,  $J = 6.9$  Hz), 1.40 (qq, 2H,  $J = 7.6, 6.9$  Hz), 2.09 (brt, 2H,  $J = 9.7$  Hz), 2.18–2.23 (m, 2H), 4.14 (s, 2H), 5.71–5.75 (m, 1H), 5.93–5.97 (m, 2H), 7.38 (dd, 1H,  $J = 6.9, 6.8$  Hz), 7.61 (dd, 1H,  $J = 6.8, 2.1$  Hz), 7.65 (dd, 1H,  $J = 6.9, 2.1$  Hz);  $^{13}\text{C NMR}$  (150 MHz,  $\text{CDCl}_3$ ):  $\delta$  -0.2, 13.4, 17.5, 18.0, 22.3, 22.9, 66.4, 118.0, 118.6 (q,  $J_{\text{CF}} = 319$  Hz), 124.6, 125.2, 127.4, 130.4, 135.1, 138.2, 139.0, 139.3, 155.7; **IR** (neat): 2951, 2866, 2252, 1396, 1215, 1141, 1095, 910, 721  $\text{cm}^{-1}$ ; **HRMS** (ESI): calcd. for  $\text{C}_{23}\text{H}_{35}\text{F}_3\text{NaO}_4\text{SSi}_2$   $[M+\text{Na}]^+$ : 543.1639; found: 543.1641.

### Synthesis of phenol **3b**

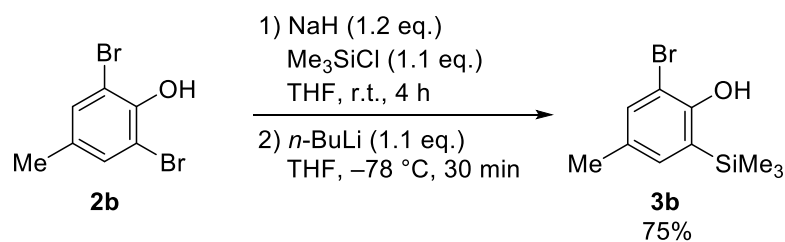

To a solution of 2,6-dibromo-4-methylphenol (**2b**) (726 mg, 2.73 mmol) in THF (15 mL) was added NaH (60% dispersion in mineral oil, 131 mg, 3.28 mmol) at 0 °C. After stirring for 30 min at this temperature,  $\text{Me}_3\text{SiCl}$  (379  $\mu\text{L}$ , 3.00 mmol) was added and the mixture was stirred for 4 h at room temperature. The reaction mixture was cooled to -78 °C, to which was added dropwise a solution of *n*-BuLi (1.6 M) in hexane (1.88 mL, 3.00 mmol) over 5 min. After stirring for 30 min at -78 °C, the reaction was quenched by adding saturated aqueous  $\text{NH}_4\text{Cl}$ , and the mixture was extracted with EtOAc (x3). The combined organic layer was washed with brine, dried ( $\text{Na}_2\text{SO}_4$ ), and concentrated in vacuo. The residue was purified by flash column

chromatography (silica gel, EtOAc/hexane = 1/100) to afford phenol **3b** (531 mg, 75%) as colorless oil.

**3b**:  $R_f$  0.71 (EtOAc/hexane = 1/10);  $^1\text{H NMR}$  (500 MHz,  $\text{CDCl}_3$ ):  $\delta$  0.29 (s, 9H), 2.66 (dd, 3H,  $J = 0.9, 0.9$  Hz), 5.53 (s, 1H), 7.07 (dq, 1H,  $J = 2.0, 0.9$  Hz), 7.28 (dq, 1H,  $J = 2.0, 0.9$  Hz);  $^{13}\text{C NMR}$  (125 MHz,  $\text{CDCl}_3$ ):  $\delta$  -1.1, 20.2, 110.1, 126.6, 130.9, 133.1, 135.0, 153.9; **IR** (neat): 3522, 2954, 1450, 1392, 1246, 1176, 906, 837, 744  $\text{cm}^{-1}$ ; **HRMS** (ESI): calcd. for  $\text{C}_{10}\text{H}_{14}\text{BrOSi}$   $[\text{M}-\text{H}]^-$ : 257.0003; found: 257.0003.

#### Synthesis of phenol **4b**

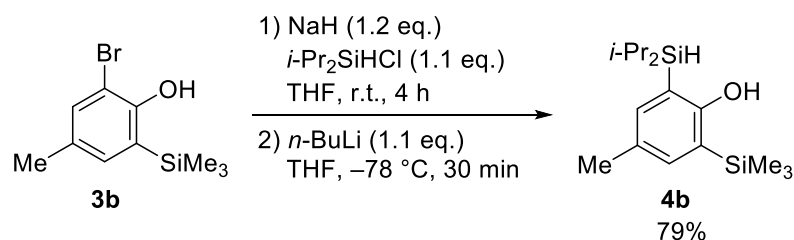

To a solution of **3b** (444 mg, 1.71 mmol) in THF (10 mL) was added NaH (60% dispersion in mineral oil, 82.0 mg, 2.05 mmol) at  $0^\circ\text{C}$ . After stirring for 30 min at this temperature,  $i\text{-Pr}_2\text{SiHCl}$  (318  $\mu\text{L}$ , 1.88 mmol) was added and the mixture was stirred for 4 h at room temperature. The reaction mixture was cooled to  $-78^\circ\text{C}$ , to which was added dropwise a solution of  $n\text{-BuLi}$  (1.6 M) in hexane (1.17 mL, 31.5 mmol) over 5 min. After stirring for 30 min at  $-78^\circ\text{C}$ , the reaction was quenched by adding saturated aqueous  $\text{NH}_4\text{Cl}$ , and the mixture was extracted with EtOAc (x3). The combined organic layer was washed with brine, dried ( $\text{Na}_2\text{SO}_4$ ), and concentrated in vacuo. The residue was purified by flash column chromatography (silica gel, hexane) to afford phenol **4b** (395 mg, 79%) as colorless oil.

**4b**:  $R_f$  0.45 (hexane);  $^1\text{H NMR}$  (600 MHz,  $\text{CDCl}_3$ ):  $\delta$  0.30 (s, 9H), 1.00 (d, 6H,  $J = 6.8$  Hz), 1.09 (d, 6H,  $J = 6.9$  Hz), 1.28 (qqd, 2H,  $J = 6.9, 6.8, 3.5$  Hz), 2.27 (s, 3H), 4.09 (t, 1H,  $J = 3.5$  Hz), 5.33 (s, 1H), 7.08 (d, 1H,  $J = 2.1$  Hz), 7.18 (d, 1H,  $J = 2.1$  Hz);  $^{13}\text{C NMR}$  (150 MHz,  $\text{CDCl}_3$ ):  $\delta$  -1.4, 10.3, 18.2, 18.4, 20.3, 116.7, 124.7, 128.8, 137.9, 164.2 (several signals overlapped); **IR** (neat): 3549, 2947, 2862, 2059, 1573, 1246, 1176, 906, 837, 729  $\text{cm}^{-1}$ ; **HRMS** (ESI): calcd. For  $\text{C}_{16}\text{H}_{29}\text{O}_2\text{Si}_2$   $[\text{M}-\text{H}]^-$ : 293.1762; found: 293.1760.

#### Synthesis of triflate **5b**

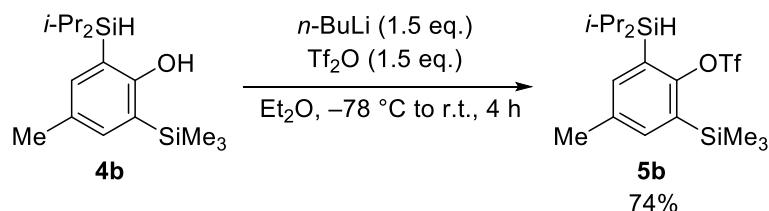

To a solution of **4b** (191 mg, 0.649 mmol) in  $\text{Et}_2\text{O}$  (6.5 mL) was added  $n\text{-BuLi}$  (1.6 M) in hexane (610  $\mu\text{L}$ , 0.974 mmol) at  $-78^\circ\text{C}$ . After stirring for 30 min at this temperature,  $\text{Tf}_2\text{O}$  (165  $\mu\text{L}$ , 0.974 mmol) was added dropwise to the mixture. The mixture was warmed to room temperature, and the stirring was continued for 4 h. The reaction was quenched by adding saturated aqueous  $\text{NaHCO}_3$ , and the mixture was extracted with EtOAc (x3). The combined organic layer was washed with brine, dried ( $\text{Na}_2\text{SO}_4$ ), and

concentrated in vacuo. The residue was purified by flash column chromatography (silica gel, hexane) to afford triflate **5b** (206 mg, 74%) as colorless oil.

**5b**:  $R_f$  0.34 (hexane);  $^1\text{H NMR}$  (500 MHz,  $\text{CDCl}_3$ ):  $\delta$  0.36 (s, 9H), 0.95 (d, 6H,  $J = 7.2$  Hz), 1.06 (d, 6H,  $J = 7.5$  Hz), 1.19–1.29 (m, 2H), 2.37 (s, 3H), 4.14–4.18 (m, 1H), 7.25 (d, 1H,  $J = 2.3$  Hz), 7.36 (d, 1H,  $J = 2.3$  Hz);  $^{13}\text{C NMR}$  (125 MHz,  $\text{CDCl}_3$ ):  $\delta$  0.2, 10.9, 18.5, 18.6, 20.9, 118.5 (q,  $J_{\text{CF}} = 318$  Hz), 129.6, 134.4, 136.6, 138.2, 138.9, 153.8; **IR** (neat): 2947, 2866, 2175, 1396, 1249, 1138, 1053, 910, 844  $\text{cm}^{-1}$ ; **HRMS** (FAB): calcd. for  $\text{C}_{17}\text{H}_{30}\text{F}_3\text{O}_3\text{SSi}_2$   $[\text{M}+\text{H}]^+$ : 427.1401; found: 427.1403.

#### Synthesis of silyl ether **7b**

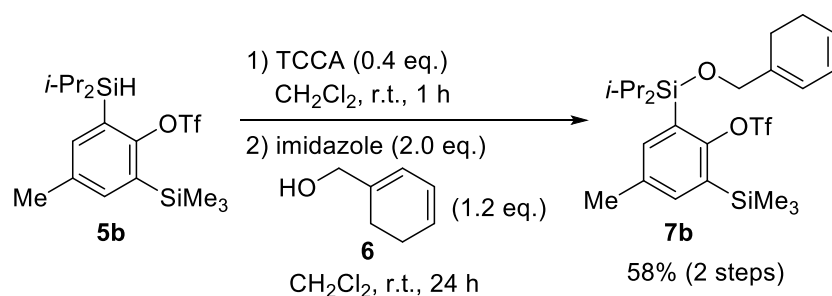

1) To a solution of **5b** (145 mg, 0.339 mmol) in  $\text{CH}_2\text{Cl}_2$  (3.5 mL) was added trichloroisocyanuric acid<sup>2</sup> (TCCA, 31.5 mg, 0.136 mmol). After stirring for 1 h at room temperature, the reaction mixture was filtered through a Celite<sup>®</sup> pad (washed with hexane), and the filtrate was concentrated in vacuo to afford the corresponding silyl chloride as colorless oil. This material was employed in the next reaction without further purification.

2) To a solution of the crude material (*vide supra*) in  $\text{CH}_2\text{Cl}_2$  (3.5 mL) were added imidazole (46.4 mg, 0.678 mmol) and alcohol **6**<sup>3</sup> (44.8 mg, 0.407 mmol) at 0 °C. After stirring for 24 h at room temperature, the reaction was quenched by adding saturated aqueous  $\text{NaHCO}_3$ , and the mixture was extracted with  $\text{CHCl}_3$  (x3). The combined organic layer was washed with brine, dried ( $\text{Na}_2\text{SO}_4$ ), and concentrated in vacuo. The residue was purified by flash column chromatography (silica gel, hexane) to afford silyl ether **7b** (104 mg, 58% in 2 steps) as colorless oil.

**7b**:  $R_f$  0.52; (EtOAc/hexane = 1/20);  $^1\text{H NMR}$  (600 MHz,  $\text{CDCl}_3$ ):  $\delta$  0.35 (s, 9H), 1.01 (d, 6H,  $J = 7.6$  Hz), 1.15 (d, 6H,  $J = 7.6$  Hz), 1.39 (qq, 2H,  $J = 7.6, 7.6$  Hz), 2.09 (brt, 2H,  $J = 8.9$  Hz), 2.18–2.23 (m, 2H), 2.34 (s, 3H), 4.13 (s, 2H), 5.72–5.76 (m, 1H), 5.93–5.98 (m, 2H), 7.37 (d, 1H,  $J = 2.3$  Hz), 7.43 (d, 1H,  $J = 2.3$  Hz);  $^{13}\text{C NMR}$  (150 MHz,  $\text{CDCl}_3$ ):  $\delta$  -0.2, 13.5, 17.6, 18.1, 20.5, 22.3, 22.9, 66.4, 118.1, 118.6 (q,  $J_{\text{CF}} = 321$  Hz), 124.6, 125.2, 129.9, 134.6, 136.9, 138.3, 139.6, 139.9, 153.7; **IR** (neat): 2947, 2866, 2360, 1396, 1249, 1211, 1138, 1045, 914, 810  $\text{cm}^{-1}$ ; **HRMS** (ESI): calcd. for  $\text{C}_{24}\text{H}_{37}\text{F}_3\text{NaO}_4\text{SSi}_2$   $[\text{M}+\text{Na}]^+$ : 557.1795; found: 557.1798.

### Synthesis of phenol **3c'**

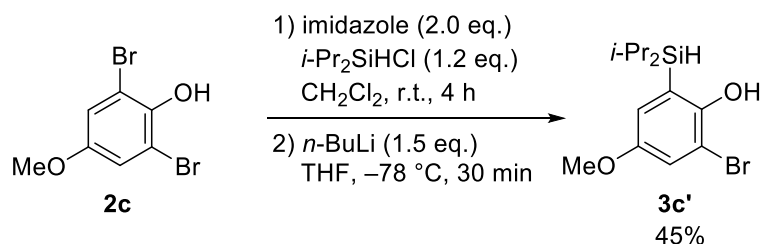

To a solution of 2,6-dibromo-4-methoxyphenol (**2c**) (2.53 g, 8.98 mmol) in CH<sub>2</sub>Cl<sub>2</sub> (30 ml) were added imidazole (1.22 g, 18.0 mmol) and *i*-Pr<sub>2</sub>SiHCl (1.83 mL, 10.8 mmol). After stirring for 3 h at room temperature, the reaction was quenched by adding phenol (169 mg, 1.80 mmol) and hexane (20 mL) was added. CH<sub>2</sub>Cl<sub>2</sub> was removed by concentration (ca. 300 mbar, 30 °C). The resulting suspension was filtered through a Celite<sup>®</sup> pad (wash with hexane), and the filtrate was concentrated in vacuo. The crude material was dissolved in THF (30 mL), to which was added *n*-BuLi (1.6 M in hexane, 8.42 mL, 13.5 mmol) dropwise at -78 °C, and the stirring was continued for 30 min at this temperature. The reaction was quenched by adding saturated aqueous NH<sub>4</sub>Cl, and the reaction mixture was extracted with EtOAc (x3). The combined organic layer was washed with brine, dried (Na<sub>2</sub>SO<sub>4</sub>), and concentrated in vacuo. The residue was purified by flash column chromatography (silica gel, hexane/EtOAc = 1/30) to afford phenol **3c'** (1.28 g, 45%) as red oil.

**3c'**: *R*<sub>f</sub> 0.53 (EtOAc/hexane = 1/5); <sup>1</sup>H NMR (500 MHz, CDCl<sub>3</sub>): δ 0.98 (d, 6H, *J* = 7.2 Hz), 1.07 (d, 6H, *J* = 7.2 Hz), 1.33 (q, 2H, *J* = 7.2, 7.2, 3.8 Hz), 3.76 (s, 3H), 3.89 (t, 1H, *J* = 3.8 Hz), 5.33 (s, 1H), 6.93 (d, 1H, *J* = 3.2 Hz), 7.02 (d, 1H, *J* = 3.2 Hz); <sup>13</sup>C NMR (125 MHz, CDCl<sub>3</sub>): δ 10.9, 18.9, 55.9, 109.7, 117.9, 122.5, 123.0, 150.0, 153.1; IR (neat): 3529, 2043, 2098, 1562, 1458, 1400, 1284, 1068, 1045, 1002, 906, 790 cm<sup>-1</sup>; HRMS (ESI): calcd. for C<sub>13</sub>H<sub>20</sub>BrO<sub>2</sub>Si [M-H]<sup>-</sup>: 315.0421; found: 315.0410.

### Synthesis of phenol **4c**

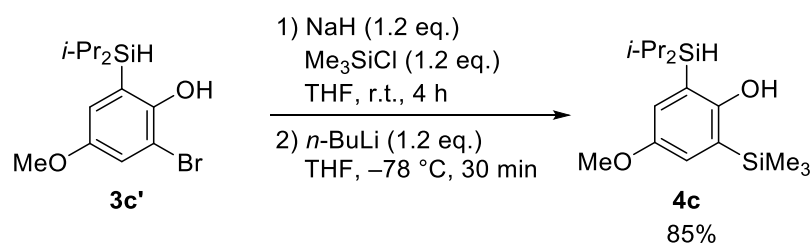

To a solution of **3c'** (1.26 g, 3.96 mmol) in THF (12 mL) was added NaH (60% dispersion in mineral oil, 190 mg, 4.75 mmol) at 0 °C. After stirring for 30 min at this temperature, Me<sub>3</sub>SiCl (600 μL, 4.75 mmol) was added and the mixture was stirred for 4 h at room temperature. The reaction mixture was cooled to -78 °C, to which was added dropwise a solution of *n*-BuLi (1.6 M) in hexane (2.97 mL, 4.75 mmol) over 5 min. After stirring for 30 min at -78 °C, the reaction was quenched by adding saturated aqueous NH<sub>4</sub>Cl, and the mixture was extracted with EtOAc (x3). The combined organic layer was washed with brine, dried (Na<sub>2</sub>SO<sub>4</sub>), and concentrated in vacuo. The residue was purified by flash column chromatography (silica gel, EtOAc/hexane = 1/30) to afford phenol **4c** (1.04 g, 85%) as colorless oil.



**4c**:  $R_f$  0.50 (EtOAc/hexane = 1/10);  $^1\text{H NMR}$  (500 MHz,  $\text{CDCl}_3$ ):  $\delta$  0.30 (s, 9H), 1.01 (d, 6H,  $J = 7.5$  Hz), 1.10 (d, 6H,  $J = 7.2$  Hz), 1.28 (qqd, 2H,  $J = 7.5, 7.2, 3.5$  Hz), 3.77 (s, 3H), 4.08 (t, 1H,  $J = 3.5$  Hz), 5.13 (s, 1H), 6.83 (d, 1H,  $J = 3.2$  Hz), 6.94 (d, 1H,  $J = 3.2$  Hz);  $^{13}\text{C NMR}$  (125 MHz,  $\text{CDCl}_3$ ):  $\delta$  -1.0, 10.7, 18.5, 18.7, 55.7, 118.0, 121.6, 122.2, 126.2, 152.7, 159.7; **IR** (neat): 3521, 2947, 2063, 2098, 1577, 1396, 1246, 1207, 1049, 1006, 906, 837, 791  $\text{cm}^{-1}$ ; **HRMS** (ESI): calcd. For  $\text{C}_{13}\text{H}_{29}\text{O}_2\text{Si}_2$   $[\text{M}-\text{H}]^-$ : 309.1712; found: 309.1715.

#### Synthesis of triflate **5c**

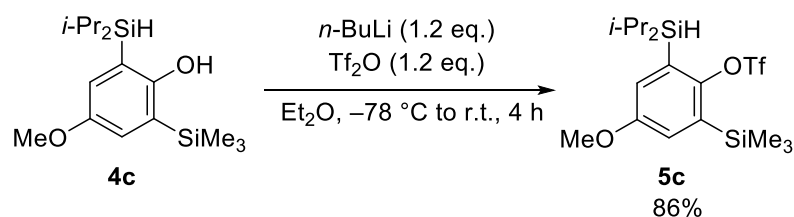

To a solution of phenol **4c** (780 mg, 2.51 mmol) in  $\text{Et}_2\text{O}$  (25 mL) was added was added  $n\text{-BuLi}$  (1.6 M) in hexane (1.89 mL, 3.01 mmol) at  $-78\text{ }^\circ\text{C}$ . After stirring for 30 min at this temperature,  $\text{Tf}_2\text{O}$  (507  $\mu\text{L}$ , 3.01 mmol) was added dropwise to the mixture. The mixture was warmed to room temperature, and the stirring was continued for 4 h. The reaction was quenched by adding saturated aqueous  $\text{NaHCO}_3$ , and the mixture was extracted with  $\text{EtOAc}$  (x3). The combined organic layer was washed with brine, dried ( $\text{Na}_2\text{SO}_4$ ), and concentrated in vacuo. The residue was purified by flash column chromatography (silica gel,  $\text{EtOAc}$ /hexane = 1/50) to afford triflate **5c** (955 mg, 86%) as colorless oil.

**5c**:  $R_f$  0.64 ( $\text{EtOAc}$ /hexane = 1/5);  $^1\text{H NMR}$  (500 MHz,  $\text{CDCl}_3$ ):  $\delta$  0.37 (s, 9H), 0.96 (d, 6H,  $J = 7.5$  Hz), 1.07 (d, 6H,  $J = 7.2$  Hz), 1.21–1.28 (m, 2H), 3.83 (s, 3H), 4.17 (brs, 1H), 6.95 (d, 1H,  $J = 3.2$  Hz), 7.04 (d, 1H,  $J = 3.2$  Hz);  $^{13}\text{C NMR}$  (125 MHz,  $\text{CDCl}_3$ ):  $\delta$  0.2, 10.9, 18.5, 18.6, 55.5, 118.5 (q,  $J_{\text{CF}} = 320$  Hz), 122.2, 122.5, 131.5, 136.3, 148.7 157.5; **IR** (neat) 2951, 1570, 1396, 1246, 1215, 1145, 1037, 910, 844, 732  $\text{cm}^{-1}$ ; **HRMS** (FAB): calcd. For  $\text{C}_{17}\text{H}_{30}\text{F}_3\text{O}_4\text{Si}_2$   $[\text{M}+\text{H}]^+$ : 443.1350; found 443.1351.

#### Synthesis of silyl ether **7c**

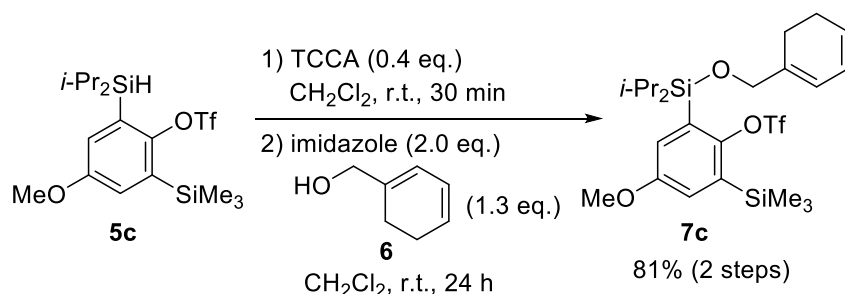

1) To a solution of **5c** (164 mg, 0.371 mmol) in  $\text{CH}_2\text{Cl}_2$  (4 mL) was added trichloroisocyanuric acid<sup>2</sup> (TCCA, 34.5 mg, 0.148 mmol). After stirring for 30 min at room temperature, the reaction mixture was filtered through a Celite<sup>®</sup> pad (washed with hexane), and the filtrate was concentrated in vacuo to afford the corresponding silyl chloride as colorless oil. This material was employed in the next reaction without further

purification.

2) To a solution of the crude material (*vide supra*) in  $\text{CH}_2\text{Cl}_2$  (4 mL) were added imidazole (50.5 mg, 0.742 mmol) and alcohol **6**<sup>3</sup> (53.1 mg, 0.482 mmol) at 0 °C. After stirring for 24 h at room temperature, the reaction was quenched by adding saturated aqueous  $\text{NaHCO}_3$ , and the mixture was extracted with  $\text{CHCl}_3$  (x3). The combined organic layer was washed with brine, dried ( $\text{Na}_2\text{SO}_4$ ), and concentrated in vacuo. The residue was purified by flash column chromatography (silica gel, EtOAc/hexane = 1/100) to afford silyl ether **7c** (143 mg, 81% in 2 steps) as colorless oil.

**7c**:  $R_f$  0.67 (EtOAc/hexane = 1/10);  $^1\text{H NMR}$  (600 MHz,  $\text{CDCl}_3$ ):  $\delta$  0.35 (s, 9H), 1.03 (d, 6H,  $J$  = 6.8 Hz), 1.17 (d, 6H,  $J$  = 6.9 Hz), 1.40 (qq, 2H,  $J$  = 6.9, 6.8 Hz), 2.07 (brt, 2H,  $J$  = 9.7 Hz), 2.16–2.23 (m, 2H), 3.77 (s, 3H), 4.15 (s, 2H), 5.71–5.74 (m, 1H), 5.93–5.96 (m, 1H), 5.99–6.01 (m, 1H), 7.07 (d, 1H,  $J$  = 2.8 Hz), 7.12 (d, 1H,  $J$  = 2.8 Hz);  $^{13}\text{C NMR}$  (150 MHz,  $\text{CDCl}_3$ ):  $\delta$  -0.3, 13.5, 17.6, 18.2, 22.2, 22.9, 55.4, 66.3, 117.9, 118.6 (q,  $J_{\text{CF}}$  = 319 Hz), 122.3, 124.5, 124.6, 125.2, 131.8, 136.6, 138.2, 148.4, 158.2; **IR** (neat) 2947, 1566, 1396, 1246, 1215, 1145, 906, 844, 732  $\text{cm}^{-1}$ ; **HRMS** (ESI): calcd. for  $\text{C}_{24}\text{H}_{37}\text{F}_3\text{NaO}_5\text{SSi}_2$  [ $\text{M}+\text{Na}$ ]<sup>+</sup>: 573.1745; found: 573.1753.

#### Synthesis of phenol **3d**

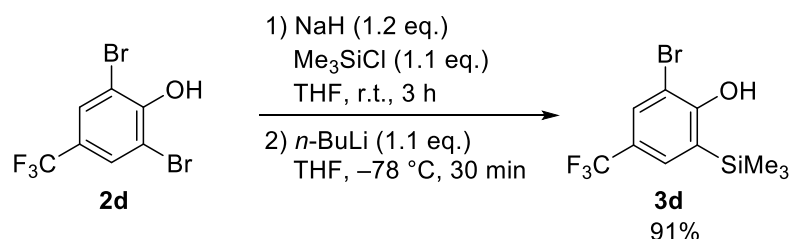

To a solution of 2,6-dibromo-4-trifluoromethylphenol (**2d**) (2.05 g, 6.41 mmol) in THF (30 mL) was added NaH (60% dispersion in mineral oil, 308 mg, 7.70 mmol) at 0 °C. After stirring for 30 min at this temperature, Me<sub>3</sub>SiCl (891  $\mu\text{L}$ , 7.06 mmol) was added and the mixture was stirred for 3 h at room temperature. The reaction mixture was cooled to -78 °C, to which was added dropwise a solution of *n*-BuLi (1.6 M) in hexane (4.41 mL, 7.06 mmol) over 5 min. After stirring for 30 min at -78 °C, the reaction was quenched by adding saturated aqueous  $\text{NH}_4\text{Cl}$ , and the mixture was extracted with EtOAc (x3). The combined organic layer was washed with brine, dried ( $\text{Na}_2\text{SO}_4$ ), and concentrated in vacuo. The residue was purified by flash column chromatography (silica gel, EtOAc/hexane = 1/20) to afford phenol **3d** (1.82 g, 91%) as colorless oil.

**3d**:  $R_f$  0.57 (EtOAc/hexane = 1/5);  $^1\text{H NMR}$  (500 MHz,  $\text{CDCl}_3$ ):  $\delta$  0.33 (s, 9H), 6.03 (s, 1H), 7.51 (d, 1H,  $J$  = 2.1 Hz), 7.73 (d, 1H,  $J$  = 2.1 Hz);  $^{13}\text{C NMR}$  (125 MHz,  $\text{CDCl}_3$ ):  $\delta$  -1.5, 110.1, 123.6 (q,  $J_{\text{CF}}$  = 271 Hz), 123.9 (q,  $J_{\text{CF}}$  = 32 Hz), 128.0, 130.2 (q,  $J_{\text{CF}}$  = 3.6 Hz), 131.5 (q,  $J_{\text{CF}}$  = 3.6 Hz), 158.7; **IR** (neat): 3514, 2958, 1597, 1311, 1246, 1122, 906, 840, 732  $\text{cm}^{-1}$ ; **HRMS** (ESI): calcd. for  $\text{C}_{10}\text{H}_{11}\text{BrF}_3\text{OSi}$  [ $\text{M}-\text{H}$ ]<sup>-</sup>: 310.9720; found: 310.9726.

### Synthesis of phenol **4d**

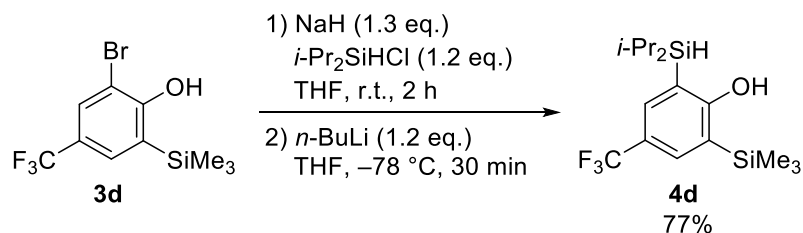

To a solution of **3d** (578 mg, 1.84 mmol) in THF (10 mL) was added NaH (60% dispersion in mineral oil, 96 mg, 2.40 mmol) at 0 °C. After stirring for 30 min at this temperature, *i*-Pr<sub>2</sub>SiHCl (375 μL, 2.21 mmol) was added and the mixture was stirred for 2 h at room temperature. The reaction mixture was cooled to -78 °C, to which was added dropwise a solution of *n*-BuLi (1.60 M) in hexane (1.38 mL, 2.21 mmol) over 5 min. After stirring for 30 min at -78 °C, the reaction was quenched by adding saturated aqueous NH<sub>4</sub>Cl, and the mixture was extracted with EtOAc (x3). The combined organic layer was washed with brine, dried (Na<sub>2</sub>SO<sub>4</sub>), and concentrated in vacuo. The residue was purified by flash column chromatography (silica gel, EtOAc/hexane = 1/100) to afford phenol **4d** (496 mg, 77%) as colorless oil.

**4d**: *R*<sub>f</sub> 0.64 (EtOAc/hexane = 1/20); <sup>1</sup>H NMR (500 MHz, CDCl<sub>3</sub>): δ 0.33 (s, 9H), 1.00 (d, 6H, *J* = 7.5 Hz), 1.10 (d, 6H, *J* = 7.5 Hz), 1.32 (qqd, 2H, *J* = 7.5, 7.5, 3.4 Hz), 4.15 (t, 1H, *J* = 3.4 Hz), 5.86 (s, 1H), 7.52 (d, 1H, *J* = 2.3 Hz), 7.60 (d, 1H, *J* = 2.3 Hz); <sup>13</sup>C NMR (125 MHz, CDCl<sub>3</sub>): δ -1.7, 10.1, 18.0, 18.2, 117.4, 122.5 (q, *J*<sub>CF</sub> = 31 Hz), 125.1 (q, *J*<sub>CF</sub> = 272 Hz), 125.9, 134.34 (q, *J*<sub>CF</sub> = 2.4 Hz), 134.43 (q, *J*<sub>CF</sub> = 3.6 Hz), 168.6; IR (neat): 3529, 2954, 2866, 2013, 1577, 1315, 1149, 1122, 940, 844, 736 cm<sup>-1</sup>; HRMS (ESI): calcd. for C<sub>16</sub>H<sub>26</sub>F<sub>3</sub>OSi<sub>2</sub> [M-H]<sup>-</sup>: 347.1480; found: 347.1488.

### Synthesis of triflate **5d**

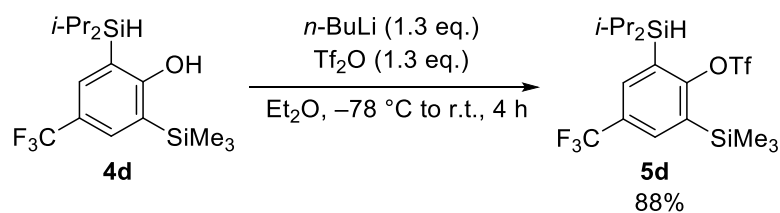

To a solution of **4d** (446 mg, 1.28 mmol) in Et<sub>2</sub>O (13 mL) was added *n*-BuLi (1.6 M) in hexane (1.04 mL, 1.66 mmol) at -78 °C. After stirring for 30 min at this temperature, Tf<sub>2</sub>O (280 μL, 1.66 mmol) was added dropwise to the mixture. The mixture was warmed to room temperature, and the stirring was continued for 4 h. The reaction was quenched by adding saturated aqueous NaHCO<sub>3</sub>, and the mixture was extracted with EtOAc (x3). The combined organic layer was washed with brine, dried (Na<sub>2</sub>SO<sub>4</sub>), and concentrated in vacuo. The residue was purified by flash column chromatography (silica gel, hexane) to afford triflate **5d** (540 mg, 88%) as colorless oil.

**5d**: *R*<sub>f</sub> 0.48 (hexane); <sup>1</sup>H NMR (500 MHz, CDCl<sub>3</sub>): δ 0.41 (s, 9H), 0.95 (d, 6H, *J* = 7.2 Hz), 1.07 (d, 6H, *J* = 7.4 Hz), 1.24–1.34 (m, 2H), 4.21–4.24 (m, 1H), 7.70 (d, 1H, *J* = 2.0 Hz), 7.82 (d, 1H, *J* = 2.0 Hz); <sup>13</sup>C NMR (125 MHz, CDCl<sub>3</sub>): δ 0.1, 10.7, 18.4, 118.5 (q, *J*<sub>CF</sub> = 318 Hz), 123.7 (q, *J*<sub>CF</sub> = 272 Hz), 129.4 (q, *J*<sub>CF</sub> = 32 Hz),



dispersion in mineral oil, 277 mg, 6.93 mmol) at 0 °C. After stirring for 30 min at this temperature, *i*-Pr<sub>2</sub>SiHCl (1.08 mL, 6.35 mmol) was added and the mixture was stirred for 3 h at room temperature. The reaction mixture was cooled to -78 °C, to which was added dropwise a solution of *n*-BuLi (1.6 M) in hexane (3.97 mL, 6.35 mmol) over 5 min. After stirring for 30 min at -78 °C, the reaction was quenched by adding saturated aqueous NH<sub>4</sub>Cl, and the mixture was extracted with EtOAc (x3). The combined organic layer was washed with brine, dried (Na<sub>2</sub>SO<sub>4</sub>), and concentrated in vacuo. The residue was purified by flash column chromatography (silica gel, hexane) to afford phenol **3e'** (1.06 g, 60%) as colorless oil.

**3e'**: *R*<sub>f</sub> 0.63 (EtOAc/hexane = 1/10); <sup>1</sup>H NMR (500 MHz, CDCl<sub>3</sub>): δ 0.98 (d, 6H, *J* = 7.4 Hz), 1.07 (d, 6H, *J* = 7.5 Hz), 1.33 (qqd, 2H, *J* = 7.5, 7.4, 3.7 Hz), 3.89 (t, 1H, *J* = 3.7 Hz), 5.52 (s, 1H), 7.08 (dd, 1H, *J*<sub>HF</sub> = 7.7, *J* = 3.2 Hz), 7.22 (dd, 1H, *J*<sub>HF</sub> = 7.5, *J* = 3.2 Hz); <sup>13</sup>C NMR (125 MHz, CDCl<sub>3</sub>): δ 10.8, 18.8, 109.3 (d, *J*<sub>CF</sub> = 8.4 Hz), 119.8 (d, *J*<sub>CF</sub> = 26 Hz), 123.1 (d, *J*<sub>CF</sub> = 20 Hz), 152.2, 155.8 (d, *J*<sub>CF</sub> = 244 Hz) (several signals overlapped); IR (neat): 3525, 2943, 2862, 2102, 1446, 1400, 1195, 906 cm<sup>-1</sup>; HRMS (ESI): calcd. for C<sub>12</sub>H<sub>17</sub>BrFOSi [M-H]<sup>-</sup>: 303.0222; found 303.0219.

#### Synthesis of phenol **4e**

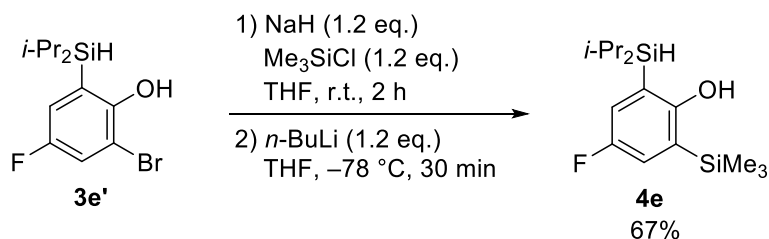

To a solution of **3e'** (665 mg, 2.18 mmol) in THF (8 mL) was added NaH (60% dispersion in mineral oil, 105 mg, 2.61 mmol) at 0 °C. After stirring for 30 min at this temperature, Me<sub>3</sub>SiCl (330 μL, 2.61 mmol) was added and the mixture was stirred for 2 h at room temperature. The reaction mixture was cooled to -78 °C, to which was added dropwise a solution of *n*-BuLi (1.60 M) in hexane (1.63 mL, 2.61 mmol) over 5 min. After stirring for 30 min at -78 °C, the reaction was quenched by adding saturated aqueous NH<sub>4</sub>Cl, and the mixture was extracted with EtOAc (x3). The combined organic layer was washed with brine, dried (Na<sub>2</sub>SO<sub>4</sub>), and concentrated in vacuo. The residue was purified by flash column chromatography (silica gel, hexane) to afford phenol **4e** (435 mg, 67%) as colorless oil.

**4e**: *R*<sub>f</sub> 0.39 (hexane); <sup>1</sup>H NMR (500 MHz, CDCl<sub>3</sub>): δ 0.30 (s, 9H), 1.00 (d, 6H, *J* = 7.5 Hz), 1.10 (d, 6H, *J* = 7.2 Hz), 1.28 (qqd, 2H, *J* = 7.5, 7.2, 3.2 Hz), 4.08 (t, 1H, *J* = 3.2 Hz), 5.32 (s, 1H), 6.94 (dd, 1H, *J*<sub>HF</sub> = 8.0, *J* = 2.9 Hz), 7.04 (dd, 1H, *J*<sub>HF</sub> = 8.3, *J* = 2.9 Hz); <sup>13</sup>C NMR (125 MHz, CDCl<sub>3</sub>): δ -1.1, 10.5, 18.4, 18.6, 118.7 (d, *J*<sub>CF</sub> = 2.4 Hz), 122.2 (d, *J*<sub>CF</sub> = 20 Hz), 122.8 (d, *J*<sub>CF</sub> = 20 Hz), 127.3 (d, *J*<sub>CF</sub> = 3.6 Hz), 156.9 (d, *J*<sub>CF</sub> = 240 Hz), 161.3; IR (neat): 3552, 2951, 2866, 2067, 1396, 1195, 906, 840 cm<sup>-1</sup>; HRMS (ESI): calcd. for C<sub>15</sub>H<sub>26</sub>FOSi<sub>2</sub> [M-H]<sup>-</sup>: 297.1512; found: 297.1509.

### Synthesis of triflate **5e**

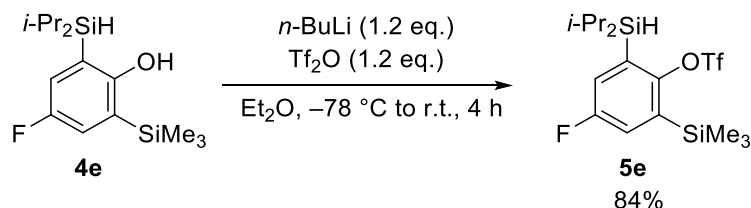

To a solution of **4e** (552 mg, 1.85 mmol) in Et<sub>2</sub>O (20 mL) was added *n*-BuLi (1.6 M) in hexane (1.38 mL, 2.22 mmol) at  $-78\text{ }^\circ\text{C}$ . After stirring for 30 min at this temperature, Tf<sub>2</sub>O (373  $\mu\text{L}$ , 2.22 mmol) was added dropwise to the mixture. The mixture was warmed to room temperature, and the stirring was continued for 4 h. The reaction was quenched by adding saturated aqueous NaHCO<sub>3</sub>, and the mixture was extracted with EtOAc (x3). The combined organic layer was washed with brine, dried (Na<sub>2</sub>SO<sub>4</sub>), and concentrated in vacuo. The residue was purified by flash column chromatography (silica gel, hexane) to afford triflate **5e** (671 mg, 84%) as colorless oil.

**5e**: *R*<sub>f</sub> 0.47 (hexane); <sup>1</sup>H NMR (500 MHz, CDCl<sub>3</sub>):  $\delta$  0.38 (s, 9H), 0.96 (d, 6H, *J* = 7.5 Hz), 1.07 (d, 6H, *J* = 7.2 Hz), 1.20–1.28 (m, 2H), 4.17 (brs, 1H), 7.13 (dd, 1H, *J*<sub>HF</sub> = 7.5, *J* = 3.2 Hz), 7.24 (dd, 1H, *J*<sub>HF</sub> = 8.1, *J* = 3.2 Hz); <sup>13</sup>C NMR (125 MHz, CDCl<sub>3</sub>):  $\delta$  0.1, 10.8, 18.5, 118.5 (q, *J*<sub>CF</sub> = 317 Hz), 123.5 (d, *J*<sub>CF</sub> = 22 Hz), 124.2 (d, *J*<sub>CF</sub> = 22 Hz), 133.4 (d, *J*<sub>CF</sub> = 4.8 Hz), 138.3 (d, *J*<sub>CF</sub> = 3.6 Hz), 150.5, 160.9 (d, *J*<sub>CF</sub> = 251 Hz); IR (neat): 2954, 2183, 1400, 1219, 1141, 906, 848 cm<sup>-1</sup>; HRMS (FAB): calcd. for C<sub>16</sub>H<sub>26</sub>F<sub>4</sub>NaO<sub>3</sub>Si<sub>2</sub> [M+Na]<sup>+</sup>: 453.0970; found: 453.0969.

### Synthesis of silyl ether **7e**

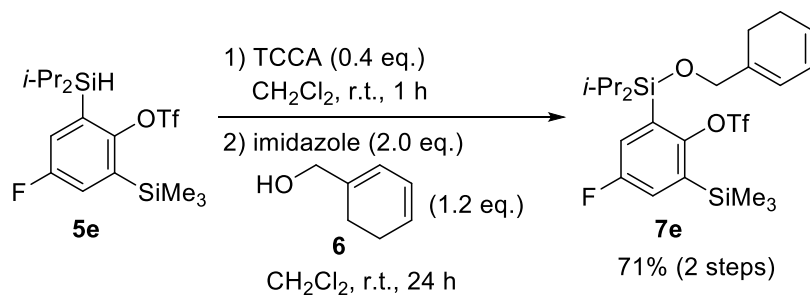

1) To a solution of **5e** (420 mg, 0.975 mmol) in CH<sub>2</sub>Cl<sub>2</sub> (10 mL) was added trichloroisocyanuric acid<sup>2</sup> (TCCA, 90.7 mg, 0.390 mmol). After stirring for 1 h at room temperature, the reaction mixture was filtered through a Celite<sup>®</sup> pad (washed with hexane), and the filtrate was concentrated in vacuo to afford the corresponding silyl chloride as colorless oil. This material was employed in the next reaction without further purification.

2) To a solution of the crude material (*vide supra*) in CH<sub>2</sub>Cl<sub>2</sub> (10 mL) were added imidazole (133 mg, 1.95 mmol) and alcohol **6**<sup>3</sup> (129 mg, 1.17 mmol) at 0  $^\circ\text{C}$ . After stirring for 24 h at room temperature, the reaction was quenched by adding saturated aqueous NaHCO<sub>3</sub>, and the mixture was extracted with CHCl<sub>3</sub> (x3). The combined organic layer was washed with brine, dried (Na<sub>2</sub>SO<sub>4</sub>), and concentrated in vacuo. The residue was purified by flash column chromatography (silica gel, hexane) to afford silyl ether **7e** (372 mg, 71% in 2 steps) as colorless oil.

**7e**:  $R_f$  0.30 (hexane);  $^1\text{H NMR}$  (600 MHz,  $\text{CDCl}_3$ ):  $\delta$  0.36 (s, 9H), 1.02 (d, 6H,  $J = 7.6$  Hz), 1.15 (d, 6H,  $J = 7.6$  Hz), 1.39 (qq, 2H,  $J = 7.6, 7.6$  Hz), 2.11 (brt, 2H,  $J = 8.9$  Hz), 2.19–2.24 (m, 2H), 4.18 (s, 2H), 5.73–5.77 (m, 1H), 5.93–5.97 (m, 2H), 7.25 (dd, 1H,  $J_{\text{HF}} = 7.6, J = 2.8$  Hz), 7.33 (dd, 1H,  $J_{\text{HF}} = 7.6, J = 2.8$  Hz);  $^{13}\text{C NMR}$  (150 MHz,  $\text{CDCl}_3$ ):  $\delta$  -0.4, 13.3, 17.5, 17.9, 22.3, 22.9, 66.7, 118.4, 118.6 (q,  $J_{\text{CF}} = 319$  Hz), 124.5, 124.8 (d,  $J_{\text{CF}} = 22$  Hz), 125.2 (d,  $J_{\text{CF}} = 22$  Hz), 125.4, 134.1 (d,  $J_{\text{CF}} = 2.9$  Hz), 137.8, 138.5 (d,  $J_{\text{CF}} = 2.9$  Hz), 150.3, 161.6 (d,  $J_{\text{CF}} = 253$  Hz); **IR** (neat): 2951, 2870, 1566, 1400, 1365, 1215, 1141, 1053, 906, 840, 732  $\text{cm}^{-1}$ ; **HRMS** (ESI): calcd. for  $\text{C}_{23}\text{H}_{34}\text{F}_4\text{NaO}_4\text{SSi}_2$   $[\text{M}+\text{Na}]^+$ : 561.1545; found: 561.1552.

### Synthesis of phenol **3f**

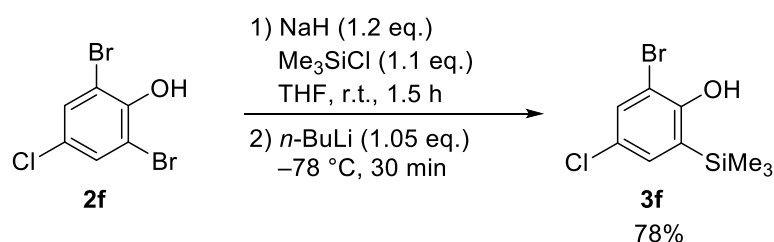

To a solution of 2,6-dibromo-4-chlorophenol (**2f**) (2.99 g, 10.4 mmol) in THF (30 mL) was added NaH (60% dispersion in mineral oil, 501 mg, 12.5 mmol) at 0 °C. After stirring for 30 min at this temperature,  $\text{Me}_3\text{SiCl}$  (1.45 mL, 11.49 mmol) was added dropwise and the mixture was stirred for 1.5 h at room temperature. The reaction mixture was cooled to -78 °C, to which was added dropwise a solution of *n*-BuLi (2.30 M) in hexane (4.77 mL, 11.0 mmol) over 5 min. After stirring for 30 min at -78 °C, the reaction was quenched by adding saturated aqueous  $\text{NH}_4\text{Cl}$ , and the mixture was extracted with EtOAc (x3). The combined organic layer was washed with brine, dried ( $\text{Na}_2\text{SO}_4$ ), and concentrated in vacuo. The residue was purified by flash column chromatography (silica gel, hexane) to afford phenol **3f** (2.29 g, 78%) as a white solid.

**3f**:  $R_f$  0.50 (hexane); Spectral data matched those reported in the literature.<sup>4</sup>

### Synthesis of triflate **5f**

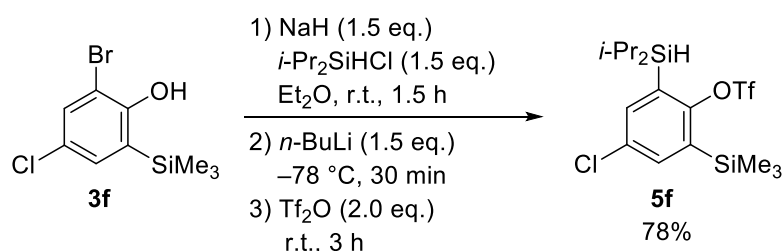

To a solution of **3f** (537 mg, 1.92 mmol) in Et<sub>2</sub>O (20 mL) was added NaH (60% dispersion in mineral oil, 115 mg, 2.88 mmol) at 0 °C. After stirring for 30 min at this temperature, *i*-Pr<sub>2</sub>SiHCl (488  $\mu\text{L}$ , 2.88 mmol) was added and the mixture was stirred for 1.5 h at room temperature. The reaction mixture was cooled to -78 °C, to which was added dropwise a solution of *n*-BuLi (1.60 M) in hexane (1.80 mL, 2.88 mmol) over 5 min. After stirring for 30 min at -78 °C,  $\text{Tf}_2\text{O}$  (647  $\mu\text{L}$ , 3.84 mmol) was added and the the mixture was warmed to room temperature and stirred for 3 h. The reaction was quenched by adding saturated aqueous  $\text{NaHCO}_3$ ,

and the mixture was extracted with EtOAc (x3). The combined organic layer was washed with brine, dried ( $\text{Na}_2\text{SO}_4$ ), and concentrated in vacuo. The residue was purified by flash column chromatography (silica gel, hexane) to afford triflate **5f** (672 mg, 78%) as colorless oil.

**5f**:  $R_f$  0.50 (hexane);  $^1\text{H NMR}$  (500 MHz,  $\text{CDCl}_3$ ):  $\delta$  0.38 (s, 9H), 0.96 (d, 6H,  $J = 7.5$  Hz), 1.07 (d, 6H,  $J = 7.2$  Hz), 1.21–1.29 (m, 2H), 4.15–4.18 (m, 1H), 7.40 (d, 1H,  $J = 2.9$  Hz), 7.51 (d, 1H,  $J = 2.9$  Hz);  $^{13}\text{C NMR}$  (125 MHz,  $\text{CDCl}_3$ ):  $\delta$  0.1, 10.8, 18.4, 118.5 (q,  $J_{\text{CF}} = 318$  Hz), 130.0, 133.9, 136.8, 137.69, 137.73, 153.6; **IR** (neat): 2951, 2866, 2183, 1400, 1365, 1211, 1138, 1060, 879, 732  $\text{cm}^{-1}$ ; **HRMS** (FAB): calcd. for  $\text{C}_{16}\text{H}_{27}\text{ClF}_3\text{O}_3\text{SSi}_2$   $[\text{M}+\text{H}]^+$ : 447.0855; found: 447.0865.

#### Synthesis of silyl ether **7f**

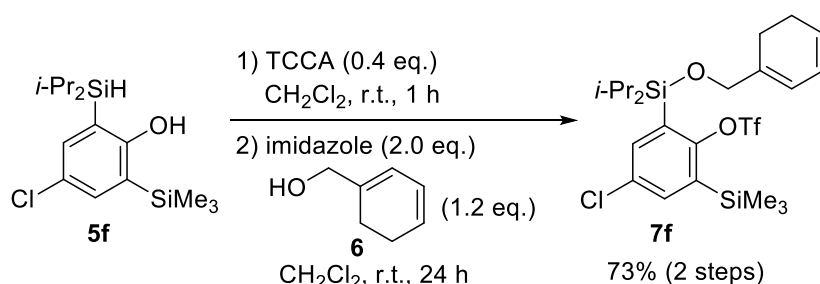

1) To a solution of **5f** (127 mg, 0.284 mmol) in  $\text{CH}_2\text{Cl}_2$  (3 mL) was added trichloroisocyanuric acid<sup>2</sup> (TCCA, 26.4 mg, 0.113 mmol). After stirring for 1 h at room temperature, the reaction mixture was filtered through a Celite<sup>®</sup> pad (washed with hexane), and the filtrate was concentrated in vacuo to afford the corresponding silyl chloride as colorless oil. This material was employed in the next reaction without further purification.

2) To a solution of the crude material (*vide supra*) in  $\text{CH}_2\text{Cl}_2$  (3 mL) were added imidazole (38.7 mg, 0.568 mmol) and alcohol **6**<sup>3</sup> (37.5 mg, 0.341 mmol) at 0 °C. After stirring for 24 h at room temperature, the reaction was quenched by adding saturated aqueous  $\text{NaHCO}_3$ , and the mixture was extracted with  $\text{CHCl}_3$  (x3). The combined organic layer was washed with brine, dried ( $\text{Na}_2\text{SO}_4$ ), and concentrated in vacuo. The residue was purified by flash column chromatography (silica gel, hexane) to afford silyl ether **7f** (114 mg, 73% in 2 steps) as colorless oil.

**7f**:  $R_f$  0.27 (EtOAc/hexane = 1/100);  $^1\text{H NMR}$  (600 MHz,  $\text{CDCl}_3$ ):  $\delta$  0.37 (s, 9H), 1.01 (d, 6H,  $J = 7.6$  Hz), 1.15 (d, 6H,  $J = 7.6$  Hz), 1.39 (qq, 2H,  $J = 7.6, 7.6$  Hz), 2.11 (brt, 2H,  $J = 9.6$  Hz), 2.20–2.24 (m, 2H), 4.16 (s, 2H), 5.73–5.77 (m, 1H), 5.92–5.97 (m, 2H), 7.51 (d, 1H,  $J = 2.8$  Hz), 7.59 (d, 1H,  $J = 2.8$  Hz);  $^{13}\text{C NMR}$  (150 MHz,  $\text{CDCl}_3$ ):  $\delta$  -0.4, 13.4, 17.4, 18.0, 22.3, 22.9, 66.7, 118.58, 118.59 (q,  $J_{\text{CF}} = 319$  Hz), 124.5, 125.4, 133.4, 134.3, 137.7, 137.9, 138.3, 138.6, 153.6; **IR** (neat) 2951, 2870, 1400, 1211, 1138, 1049, 875, 840, 732  $\text{cm}^{-1}$ ; **HRMS** (ESI): calcd. for  $\text{C}_{23}\text{H}_{34}\text{ClF}_3\text{KO}_4\text{SSi}_2$   $[\text{M}+\text{K}]^+$ : 593.0989; found: 593.0987.



### Synthesis of phenol **3g**

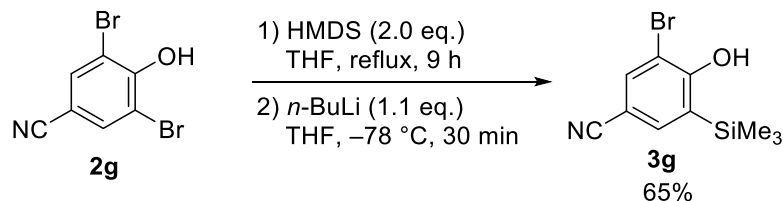

1) To a solution of 2,6-dibromo-4-cyanophenol (**2g**) (1.48 g, 5.45 mmol) in THF (6 mL) was added 1,1,1,3,3,3-hexamethyldisilazane (HMDS, 2.28 mL, 10.9 mmol) at room temperature and the mixture was refluxed for 9 h. After cooling to room temperature, the solvent and HMDS were removed under reduced pressure to afford the corresponding silyl ether as colorless oil. This material was employed in the next reaction without further purification.

2) To a stirred solution of the crude material (*vide supra*) in THF (27 mL) was added dropwise *n*-BuLi (1.60 M in hexanes, 3.74 mL, 5.99 mmol) at -78 °C. After stirring for 30 min at -78 °C, the reaction was quenched by adding saturated aqueous NH<sub>4</sub>Cl, and the mixture was extracted with EtOAc (x3). The combined organic layer was washed with brine, dried (Na<sub>2</sub>SO<sub>4</sub>), and concentrated in vacuo. The residue was purified by flash column chromatography (silica gel, EtOAc/hexane = 1/10) to afford phenol **3g** (1.01 g, 65%) as a white solid.

**3g**: mp: 113–120 °C; *R*<sub>f</sub> 0.38 (EtOAc/hexane = 1/5); <sup>1</sup>H NMR (500 MHz, CDCl<sub>3</sub>): δ 0.32 (s, 9H), 6.20 (s, 1H), 7.57 (d, 1H, *J* = 1.6 Hz), 7.78 (d, 1H, *J* = 1.6 Hz); <sup>13</sup>C NMR (125 MHz, CDCl<sub>3</sub>): δ -1.5, 105.4, 110.4, 118.0, 128.9, 136.4, 138.7, 159.6; IR (neat): 3402, 2958, 2225, 1577, 1442, 1242, 1138, 1080, 902, 840, 729 cm<sup>-1</sup>; HRMS (ESI): calcd. for C<sub>10</sub>H<sub>11</sub>BrNOSi [M-H]<sup>-</sup>: 267.9799; found: 267.9795.

### Synthesis of phenol **4g**

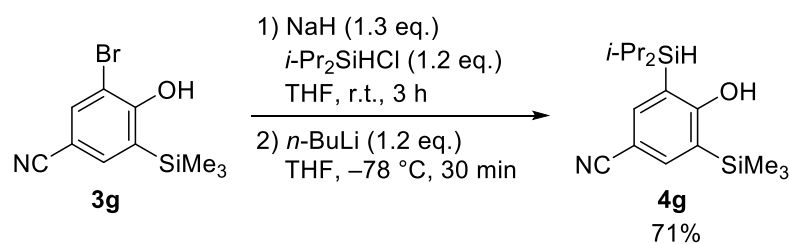

To a solution of **3g** (502 mg, 1.86 mmol) in THF (10 mL) was added NaH (60% dispersion in mineral oil, 97 mg, 2.42 mmol) at 0 °C. After stirring for 30 min at this temperature, *i*-Pr<sub>2</sub>SiHCl (390 μL, 2.23 mmol) was added and the mixture was stirred for 3 h at room temperature. The reaction mixture was cooled to -78 °C, to which was added dropwise a solution of *n*-BuLi (1.60 M) in hexane (1.39 mL, 2.23 mmol) over 5 min. After stirring for 30 min at -78 °C, the reaction was quenched by adding saturated aqueous NH<sub>4</sub>Cl, and the mixture was extracted with EtOAc (x3). The combined organic layer was washed with brine, dried (Na<sub>2</sub>SO<sub>4</sub>), and concentrated in vacuo. The residue was purified by flash column chromatography (silica gel, EtOAc/hexane = 1/50) to afford phenol **4g** (402 mg, 71%) as colorless oil.

**4g**: *R*<sub>f</sub> 0.58 (EtOAc/hexane = 1/20); <sup>1</sup>H NMR (500 MHz, CDCl<sub>3</sub>): δ 0.32 (s, 9H), 0.99 (d, 6H, *J* = 7.5 Hz), 1.10 (d, 6H, *J* = 7.4 Hz), 1.31 (qqd, 2H, *J* = 7.5, 7.4, 3.5 Hz), 4.14 (t, 1H, *J* = 3.5 Hz), 6.04 (s, 1H), 7.58 (d,

$^1\text{H}$ ,  $J = 2.1$  Hz), 7.65 (d, 1H  $J = 2.1$  Hz);  $^{13}\text{C}$  NMR (125 MHz,  $\text{CDCl}_3$ ):  $\delta$  -1.8, 9.9, 17.8, 18.1, 104.2, 118.6, 120.1, 127.1, 141.3, 141.5, 169.0; IR (neat): 3525, 2951, 2866, 2222, 2067, 1562, 1404, 1246, 1006, 906, 840, 729  $\text{cm}^{-1}$ ; HRMS (ESI): calcd. for  $\text{C}_{16}\text{H}_{26}\text{NOSi}_2$   $[\text{M}-\text{H}]^-$ : 304.1558; found: 304.1567.

#### Synthesis of triflate **5g**

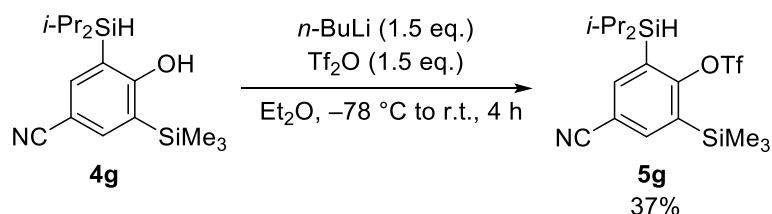

To a solution of **4g** (222 mg, 0.725 mmol) in  $\text{Et}_2\text{O}$  (8 mL) was added  $n\text{-BuLi}$  (1.6 M) in hexane (473  $\mu\text{L}$ , 1.09 mmol) at  $-78$   $^\circ\text{C}$ . After stirring for 30 min at this temperature,  $\text{Tf}_2\text{O}$  (183  $\mu\text{L}$ , 1.09 mmol) was added dropwise to the mixture. The mixture was warmed to room temperature, and the stirring was continued for 4 h. The reaction was quenched by adding saturated aqueous  $\text{NaHCO}_3$ , and the mixture was extracted with  $\text{EtOAc}$  (x3). The combined organic layer was washed with brine, dried ( $\text{Na}_2\text{SO}_4$ ), and concentrated in vacuo. The residue was purified by flash column chromatography (silica gel,  $\text{EtOAc}/\text{hexane} = 1/30$ ) and gel-permeation chromatography [YMC-GPC T4000 $^\circledR$  (2.0 cm  $\phi \times 60$  cm) + T2000 $^\circledR$  (2.0 cm  $\phi \times 60$  cm),  $\text{CHCl}_3$ , flow rate 8.0 mL/min] to afford triflate **5g** (117 mg, 37%) as colorless oil.

**5g**:  $R_f$  0.19 ( $\text{EtOAc}/\text{hexane} = 1/20$ );  $^1\text{H}$  NMR (600 MHz,  $\text{CDCl}_3$ ):  $\delta$  0.40 (s, 9H), 0.95 (d, 6H,  $J = 7.6$  Hz), 1.07 (d, 6H,  $J = 7.6$  Hz), 1.24–1.30 (m, 2H), 4.19–4.22 (m, 1H), 7.74 (d, 1H,  $J = 2.8$  Hz), 7.87 (d, 1H,  $J = 2.8$  Hz);  $^{13}\text{C}$  NMR (150 MHz,  $\text{CDCl}_3$ ):  $\delta$  -0.5, 10.2, 17.9, 18.0, 112.5, 118.2, 118.6 (q,  $J_{\text{CF}} = 319$  Hz), 133.1, 137.9, 141.1, 142.2, 158.2; IR (neat): 2954, 2866, 2233, 1400, 1219, 1138, 1064, 906, 844, 732  $\text{cm}^{-1}$ ; HRMS (FAB): calcd. for  $\text{C}_{17}\text{H}_{27}\text{F}_3\text{NO}_3\text{SSi}_2$   $[\text{M}+\text{H}]^+$ : 438.1202; found: 438.1211.

#### Synthesis of silyl ether **7g**

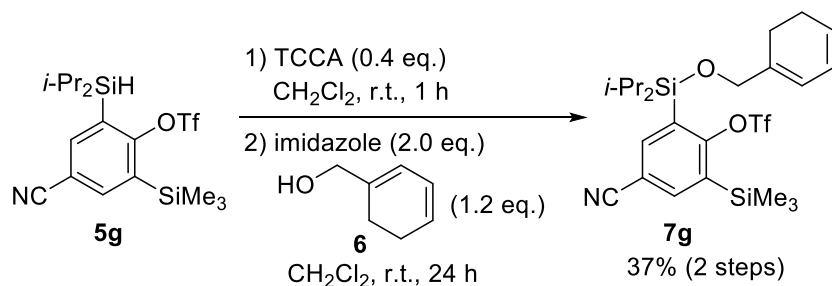

1) To a solution of **5g** (79.5 mg, 0.182 mmol) in  $\text{CH}_2\text{Cl}_2$  (2 mL) was added trichloroisocyanuric acid<sup>2</sup> (TCCA, 16.9 mg, 0.0727 mmol). After stirring for 1 h at room temperature, the reaction mixture was filtered through a Celite $^\circledR$  pad (washed with hexane), and the filtrate was concentrated in vacuo to afford the corresponding silyl chloride as colorless oil. This material was employed in the next reaction without further purification.

2) To a solution of the crude material (*vide supra*) in  $\text{CH}_2\text{Cl}_2$  (2 mL) were added imidazole (24.8 mg, 0.364 mmol) and alcohol **6**<sup>3</sup> (24.1 mg, 0.218 mmol) at  $0$   $^\circ\text{C}$ . After stirring for 24 h at room temperature, the reaction

was quenched by adding saturated aqueous NaHCO<sub>3</sub>, and the mixture was extracted with CHCl<sub>3</sub> (x3). The combined organic layer was washed with brine, dried (Na<sub>2</sub>SO<sub>4</sub>), and concentrated in vacuo. The residue was purified by flash column chromatography (silica gel, EtOAc/hexane = 1/30) and further purified by PTLC (hexane/EtOAc = 1/50 x2) to afford silyl ether **7g** (37.0 mg, 37% in 2 steps) as colorless oil.

**7g**: *R*<sub>f</sub> 0.63 (EtOAc/hexane = 1/5); <sup>1</sup>H NMR (600 MHz, CDCl<sub>3</sub>): δ 0.39 (s, 9H), 1.00 (d, 6H, *J* = 7.6 Hz), 1.15 (d, 6H, *J* = 7.6 Hz), 1.40 (qq, 2H, *J* = 7.6, 7.6 Hz), 2.12 (brt, 2H, *J* = 8.9 Hz), 2.21–2.25 (m, 2H), 4.18 (s, 2H), 5.74–5.78 (m, 1H), 5.90–5.97 (m, 2H), 7.87 (d, 1H, *J* = 2.7 Hz), 7.93 (d, 1H, *J* = 2.7 Hz); <sup>13</sup>C NMR (150 MHz, CDCl<sub>3</sub>): δ –0.4, 13.2, 17.3, 17.8, 22.2, 22.9, 66.9, 112.4, 118.2, 118.6 (q, *J*<sub>CF</sub> = 319 Hz), 118.9, 124.4, 125.7, 133.3, 137.3, 137.6, 142.4, 142.6, 157.9; **IR** (neat) 2951, 2870, 2233, 1404, 1369, 1215, 1138, 1053, 906, 841, 733 cm<sup>-1</sup>; **HRMS** (ESI): calcd. for C<sub>24</sub>H<sub>34</sub>F<sub>3</sub>KNO<sub>4</sub>SSi<sub>2</sub> [M+K]<sup>+</sup>: 584.1331; found 584.1357.

#### Synthesis of phenol **3h'**

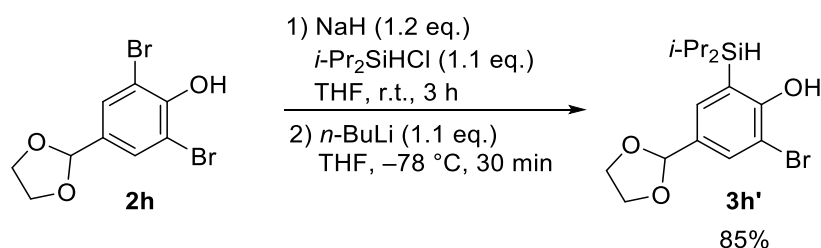

To a solution of **2h** (1.51 g, 4.67 mmol) in THF (12 mL) was added NaH (60% dispersion in mineral oil, 244 mg, 5.60 mmol) at 0 °C. After stirring for 30 min at this temperature, *i*-Pr<sub>2</sub>SiHCl (1.08 mL, 6.35 mmol) was added and the mixture was stirred for 3 h at room temperature. The reaction mixture was cooled to –78 °C, to which was added dropwise a solution of *n*-BuLi (1.6 M) in hexane (3.19 mL, 5.11 mmol) over 5 min. After stirring for 30 min at –78 °C, the reaction was quenched by adding saturated aqueous NH<sub>4</sub>Cl, and the mixture was extracted with EtOAc (x3). The combined organic layer was washed with brine, dried (Na<sub>2</sub>SO<sub>4</sub>), and concentrated in vacuo. The residue was purified by flash column chromatography (silica gel, EtOAc/hexane = 1/10) to afford phenol **3h'** (1.45 g, 85%) as a white solid.

**3h'**: *mp*: 61–63 °C; *R*<sub>f</sub> 0.35 (EtOAc/hexane = 1/5); <sup>1</sup>H NMR (500 MHz, CDCl<sub>3</sub>): δ 0.97 (d, 6H, *J* = 7.5 Hz), 1.07 (d, 6H, *J* = 7.5 Hz), 1.33 (qqd, 2H, *J* = 7.5, 7.5, 3.7 Hz), 3.92 (t, 1H, *J* = 3.7 Hz), 4.01–4.04 (m, 2H), 4.12–4.15 (m, 2H), 5.71 (s, 1H), 5.79 (s, 1H), 7.43 (d, 1H, *J* = 2.0 Hz), 7.63 (d, 1H, *J* = 2.0 Hz); <sup>13</sup>C NMR (125 MHz, CDCl<sub>3</sub>): δ 10.8, 18.9, 65.2, 102.9, 110.3, 121.8, 131.2, 131.6, 135.9, 156.6; **IR** (neat): 3514, 2943, 2862, 2012, 1361, 1238, 1087, 906, 790 cm<sup>-1</sup>; **HRMS** (ESI): calcd. for C<sub>15</sub>H<sub>22</sub>BrO<sub>3</sub>Si [M–H]<sup>-</sup>: 357.0522; found: 357.0520.

### Synthesis of phenol **4h**

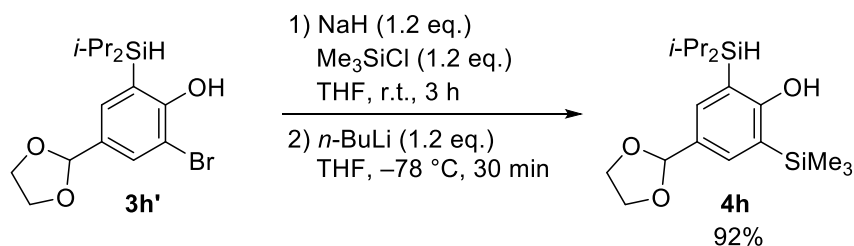

To a solution of **3h'** (1.41 g, 3.93 mmol) in THF (12 mL) was added NaH (60% dispersion in mineral oil, 105 mg, 2.61 mmol) at 0 °C. After stirring for 30 min at this temperature, Me<sub>3</sub>SiCl (596 μL, 4.71 mmol) was added and the mixture was stirred for 3 h at room temperature. The reaction mixture was cooled to -78 °C, to which was added dropwise a solution of *n*-BuLi (1.6 M) in hexane (2.95 mL, 4.71 mmol) over 5 min. After stirring for 30 min at -78 °C, the reaction was quenched by adding saturated aqueous NH<sub>4</sub>Cl, and the mixture was extracted with EtOAc (x3). The combined organic layer was washed with brine, dried (Na<sub>2</sub>SO<sub>4</sub>), and concentrated in vacuo. The residue was purified by flash column chromatography (silica gel, EtOAc/hexane = 1/20) to afford phenol **4h** (1.28 g, 92%) as colorless oil.

**4h**: *R*<sub>f</sub> 0.44 (EtOAc/hexane = 1/5); <sup>1</sup>H NMR (500 MHz, CDCl<sub>3</sub>): δ 0.30 (s, 9H), 0.99 (d, 6H, *J* = 7.5 Hz), 1.09 (d, 6H, *J* = 7.2 Hz), 1.25–1.32 (m, 2H), 4.01–4.03 (m, 2H), 4.11–4.16 (m, 3H), 5.60 (s, 1H), 5.72 (s, 1H), 7.38 (d, 1H, *J* = 2.3 Hz), 7.50 (d, 1H, *J* = 2.3 Hz); <sup>13</sup>C NMR (125 MHz, CDCl<sub>3</sub>): δ -1.0, 10.6, 18.5, 18.7, 65.2, 104.1, 116.4, 124.9, 128.6, 135.3, 135.8, 166.6; IR (neat): 3537, 2951, 2866, 2059, 1577, 1411, 1365, 1246, 1087, 906, 837, 790 cm<sup>-1</sup>; HRMS (ESI): calcd. for C<sub>18</sub>H<sub>31</sub>O<sub>3</sub>Si<sub>2</sub> [M-H]<sup>-</sup>: 351.1812; found: 351.1809.

### Synthesis of triflate **5h**

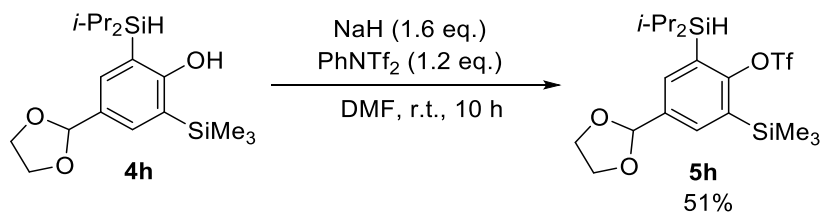

To a solution of **4h** (652 mg, 1.85 mmol) in DMF (12 mL) was added NaH (60% dispersion in mineral oil, 118 mg, 2.96 mmol) at 0 °C and the mixture was then stirred for 30 min. PhNTf<sub>2</sub> (793 mg, 2.22 mmol) was added and the mixture was warmed to room temperature. After stirring for 10 h, the reaction was quenched by adding water, and the reaction mixture was extracted with EtOAc/Hexane = 1/4 (x3). The combined organic layer was washed with water (x3), brine, dried (Na<sub>2</sub>SO<sub>4</sub>), and concentrated in vacuo. The residue was purified by flash column chromatography (silica gel, hexane/EtOAc = 1/50) to afford triflate **5h** (454 mg, 51%) as colorless oil.

**5h**: *R*<sub>f</sub> 0.44 (EtOAc/hexane = 1/5); <sup>1</sup>H NMR (500 MHz, CDCl<sub>3</sub>): δ 0.38 (s, 9H), 0.95 (d, 6H, *J* = 7.5 Hz), 1.06 (d, 6H, *J* = 7.2 Hz), 1.23–1.29 (m, 2H), 4.04–4.14 (m, 4H), 4.20 (brs, 1H), 5.84 (s, 1H), 7.57 (d, 1H, *J* = 2.0 Hz), 7.69 (d, 1H, *J* = 2.0 Hz); <sup>13</sup>C NMR (125 MHz, CDCl<sub>3</sub>): δ 0.2, 10.9, 18.5, 18.6, 63.1, 102.8, 118.5

(q,  $J_{CF}$  = 318 Hz), 130.2, 135.0, 135.7, 136.4, 136.5, 156.1; **IR** (neat): 2954, 2886, 1396, 1215, 1138, 906, 844  $\text{cm}^{-1}$ ; **HRMS** (FAB): calcd. for  $\text{C}_{19}\text{H}_{32}\text{F}_3\text{O}_5\text{SSi}_2$   $[\text{M}+\text{H}]^+$ : 485.1456; found: 485.1467.

#### Synthesis of silyl ether **7h**

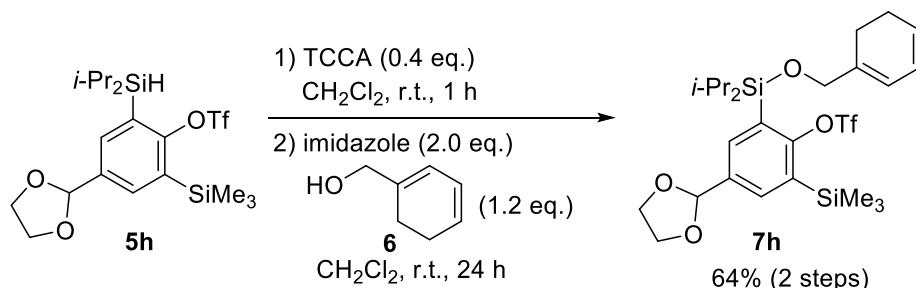

1) To a solution of **5h** (246 mg, 0.508 mmol) in  $\text{CH}_2\text{Cl}_2$  (5 mL) was added trichloroisocyanuric acid<sup>2</sup> (TCCA, 47.2 mg, 0.203 mmol). After stirring for 1 h at room temperature, the reaction mixture was filtered through a Celite<sup>®</sup> pad (washed with hexane), and the filtrate was concentrated in vacuo to afford the corresponding silyl chloride as colorless oil. This material was employed in the next reaction without further purification.

2) To a solution of the crude material (*vide supra*) in  $\text{CH}_2\text{Cl}_2$  (5 mL) were added imidazole (67.2 mg, 1.02 mmol) and alcohol **6**<sup>3</sup> (69.2 mg, 0.610 mmol) at 0 °C. After stirring for 24 h at room temperature, the reaction was quenched by adding saturated aqueous  $\text{NaHCO}_3$ , and the mixture was extracted with  $\text{CHCl}_3$  (x3). The combined organic layer was washed with brine, dried ( $\text{Na}_2\text{SO}_4$ ), and concentrated in vacuo. The residue was purified by flash column chromatography (silica gel, EtOAc/hexane = 1/20) to afford silyl ether **7h** (192 mg, 64% in 2 steps) as colorless oil.

**7h**:  $R_f$  0.38 (EtOAc/hexane = 1/10); **<sup>1</sup>H NMR** (600 MHz,  $\text{CDCl}_3$ ):  $\delta$  0.36 (s, 9H), 1.01 (d, 6H,  $J$  = 7.6 Hz), 1.16 (d, 6H,  $J$  = 7.6 Hz), 1.40 (qq, 2H,  $J$  = 7.6, 7.6 Hz), 2.08 (brt, 2H,  $J$  = 10.3 Hz), 2.18–2.23 (m, 2H), 4.00–4.07 (m, 2H), 4.10–4.14 (m, 4H), 5.72–5.75 (m, 1H), 5.80 (s, 1H), 5.94–6.00 (m, 2H), 7.69 (d, 1H,  $J$  = 2.8 Hz), 7.76 (d, 1H,  $J$  = 2.8 Hz); **<sup>13</sup>C NMR** (150 MHz,  $\text{CDCl}_3$ ):  $\delta$  -0.3, 13.5, 17.6, 18.1, 22.3, 22.9, 65.4, 66.4, 103.2, 118.0, 118.6 (q,  $J_{CF}$  = 321 Hz), 124.6, 125.1, 130.6, 135.3, 136.9, 137.2, 137.8, 138.2, 156.2; **IR** (neat) 2951, 2870, 1573, 1400, 1357, 1249, 1215, 1138, 1091, 906, 840, 732  $\text{cm}^{-1}$ ; **HRMS** (ESI): calcd. for  $\text{C}_{26}\text{H}_{39}\text{F}_3\text{KO}_6\text{SSi}_2$   $[\text{M}+\text{K}]^+$ : 631.1590; found: 631.1604.

#### Synthesis of phenol **3i'**

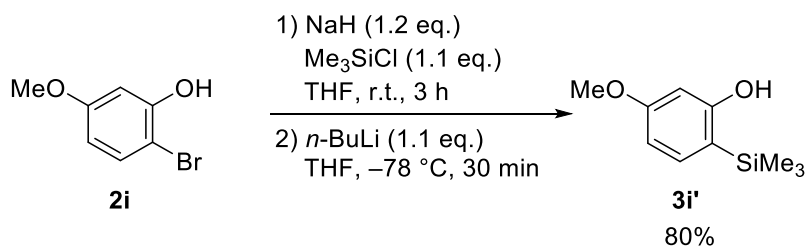

To a solution of 2-bromo-5-methoxyphenol (**2i**) (1.53 g, 7.53 mmol) in THF (23 mL) was added NaH (60% dispersion in mineral oil, 391 mg, 9.78 mmol) at 0 °C. After stirring for 30 min at this temperature,  $\text{Me}_3\text{SiCl}$

(1.14 mL, 9.03 mmol) was added and the mixture was stirred for 3 h at room temperature. The reaction mixture was cooled to  $-78\text{ }^{\circ}\text{C}$ , to which was added dropwise a solution of *n*-BuLi (1.60 M) in hexane (5.64 mL, 9.03 mmol) over 5 min. After stirring for 30 min at  $-78\text{ }^{\circ}\text{C}$ , the reaction was quenched by adding saturated aqueous  $\text{NH}_4\text{Cl}$ , and the mixture was extracted with EtOAc (x3). The combined organic layer was washed with brine, dried ( $\text{Na}_2\text{SO}_4$ ), and concentrated in vacuo. The residue was purified by flash column chromatography (silica gel, EtOAc/hexane = 1/4) to afford phenol **3i'** (1.18 g, 80%) as a white solid.

**3i'**: mp: 81–85  $^{\circ}\text{C}$ ;  $R_f$  0.45 (EtOAc/hexane = 1/3);  $^1\text{H NMR}$  (600 MHz,  $\text{CDCl}_3$ ):  $\delta$  0.28 (s, 9H), 3.78 (s, 3H), 4.86 (s, 1H), 6.27 (d, 1H,  $J = 2.0$  Hz), 6.50 (dd, 1H,  $J = 8.3, 2.0$  Hz), 7.25 (d, 1H  $J = 8.3$  Hz);  $^{13}\text{C NMR}$  (150 MHz,  $\text{CDCl}_3$ ):  $\delta$  -1.3, 55.0, 101.3, 106.0, 116.9, 136.5, 162.1, 162.5; **IR** (neat): 3375, 2954, 1600, 1504, 1404, 1269, 1199, 1161, 1080, 906, 840, 732  $\text{cm}^{-1}$ ; **HRMS** (FAB): calcd. for  $\text{C}_{10}\text{H}_{17}\text{O}_2\text{Si}$   $[\text{M}+\text{H}]^+$ : 197.0992; found: 197.0994.

#### Synthesis of phenol **4i**

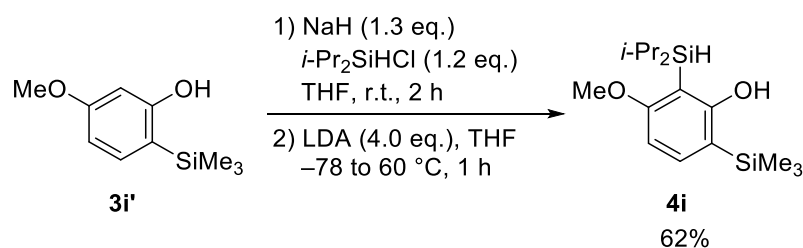

To a solution of **3i'** (496 mg, 2.53 mmol) in THF (13 mL) was added NaH (60% dispersion in mineral oil, 131 mg, 3.28 mmol) at  $0\text{ }^{\circ}\text{C}$ . After stirring for 30 min at this temperature, *i*- $\text{Pr}_2\text{SiHCl}$  (513  $\mu\text{L}$ , 3.03 mmol) was added and the mixture was stirred for 2 h at room temperature. The reaction mixture was cooled to  $-78\text{ }^{\circ}\text{C}$ , to which was added dropwise a solution of LDA (1.00 M) in THF (10.1 mL, 10.1 mmol) over 5 min. The mixture was warmed to  $60\text{ }^{\circ}\text{C}$  and stirred for 1 h. The reaction was quenched by adding saturated aqueous  $\text{NH}_4\text{Cl}$ , and the mixture was extracted with EtOAc (x3). The combined organic layer was washed with brine, dried ( $\text{Na}_2\text{SO}_4$ ), and concentrated in vacuo. The residue was purified by flash column chromatography (silica gel, EtOAc/hexane = 1/100) to afford phenol **4i** (487 mg, 62%) as colorless oil.

**4i**:  $R_f$  0.72 (EtOAc/hexane = 1/10);  $^1\text{H NMR}$  (600 MHz,  $\text{CDCl}_3$ ):  $\delta$  0.26 (s, 9H), 0.95 (d, 6H,  $J = 7.6$  Hz), 1.08 (d, 6H,  $J = 7.6$  Hz), 1.35 (qqd, 2H,  $J = 7.6, 7.6, 3.4$  Hz), 3.75 (s, 3H), 4.04 (t, 1H,  $J = 3.4$  Hz), 6.17 (s, 1H), 6.39 (d, 1H,  $J = 8.2$  Hz), 7.34 (d, 1H,  $J = 8.2$  Hz);  $^{13}\text{C NMR}$  (150 MHz,  $\text{CDCl}_3$ ):  $\delta$  -1.3, 10.6, 18.7, 19.0, 54.7, 101.4, 104.8, 117.4, 138.6, 166.6, 167.8; **IR** (neat): 3518, 2943, 2862, 2040, 1562, 1462, 1373, 1273, 1203, 1118, 1080, 1010, 906, 837, 794, 732  $\text{cm}^{-1}$ ; **HRMS** (ESI): calcd. for  $\text{C}_{16}\text{H}_{29}\text{O}_2\text{Si}_2$   $[\text{M}-\text{H}]^-$ : 309.1712; found: 309.1706.

### Synthesis of triflate **5i**

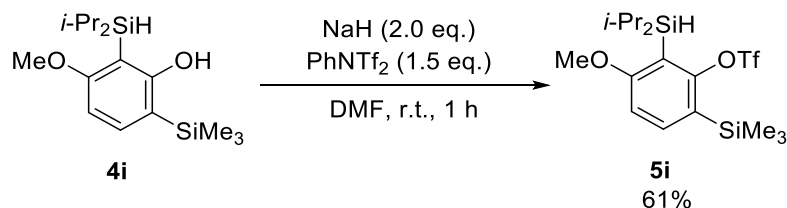

To a solution of **4i** (487 mg, 1.57 mmol) in DMF (16 ml) was added NaH (60% dispersion in mineral oil, 125 mg, 3.13 mmol) at 0 °C and the mixture was then stirred for 30 min. PhNTf<sub>2</sub> (840 mg, 2.35 mmol) was added and the mixture was warmed to room temperature. After stirring for 1 h. The reaction was quenched by adding water, and the reaction mixture was extracted with EtOAc/Hexane = 1/4 (x3). The combined organic layer was washed with water (x3), brine, dried (Na<sub>2</sub>SO<sub>4</sub>), and concentrated in vacuo. The residue was purified by flash column chromatography (silica gel, hexane/EtOAc = 1/30) to afford triflate **5i** (419 mg 61%) as a white solid.

**5i**: mp: 34–37 °C; *R*<sub>f</sub> 0.45 (EtOAc/hexane = 1/10); <sup>1</sup>H NMR (600 MHz, CDCl<sub>3</sub>): δ 0.33 (s, 9H), 0.89 (d, 6H, *J* = 7.6 Hz), 1.08 (d, 6H, *J* = 7.6 Hz), 1.25–1.32 (m, 2H), 3.82 (s, 3H), 4.02–4.04 (m, 1H), 6.86 (d, 1H, *J* = 8.2), 7.54 (d, 1H, *J* = 8.2 Hz); <sup>13</sup>C NMR (150 MHz, CDCl<sub>3</sub>): δ -0.1, 11.1, 18.97, 19.05, 55.2, 109.4, 118.8 (q, *J*<sub>CF</sub> = 319 Hz), 120.1, 126.2, 139.9, 156.6, 166.3; IR (neat): 2947, 2164, 1581, 1458, 1396, 1350, 1249, 1211, 1138, 1045, 916, 844, 736 cm<sup>-1</sup>; HRMS (FAB): calcd. for C<sub>17</sub>H<sub>30</sub>F<sub>3</sub>O<sub>4</sub>SSi<sub>2</sub> [M+H]<sup>+</sup>: 443.1350; found: 443.1354.

### Synthesis of silyl ether **7i**

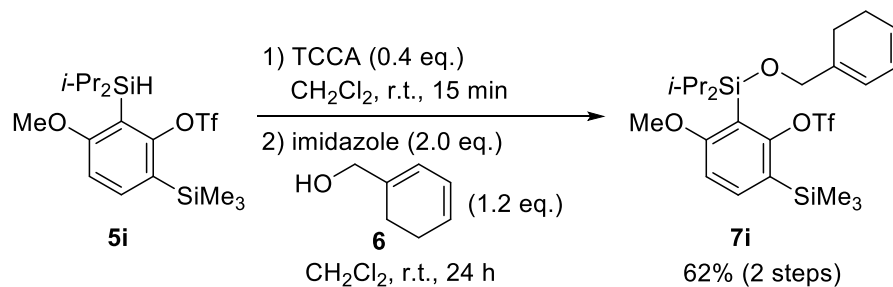

1) To a solution of **5i** (173 mg, 0.392 mmol) in CH<sub>2</sub>Cl<sub>2</sub> (4 mL) was added trichloroisocyanuric acid<sup>2</sup> (TCCA, 36.4 mg, 0.157 mmol). After stirring for 15 min at room temperature, the reaction mixture was filtered through a Celite<sup>®</sup> pad (washed with hexane), and the filtrate was concentrated in vacuo to afford the corresponding silyl chloride as colorless oil. This material was employed in the next reaction without further purification.

2) To a solution of the crude material (*vide supra*) in CH<sub>2</sub>Cl<sub>2</sub> (4 mL) were added imidazole (53.3 mg, 0.784 mmol) and alcohol **6**<sup>3</sup> (52.0 mg, 0.470 mmol) at 0 °C. After stirring for 24 h at room temperature, the reaction was quenched by adding saturated aqueous NaHCO<sub>3</sub>, and the mixture was extracted with CHCl<sub>3</sub> (x3). The combined organic layer was washed with brine, dried (Na<sub>2</sub>SO<sub>4</sub>), and concentrated in vacuo. The residue was purified by flash column chromatography (silica gel, EtOAc/hexane = 1/30) to afford silyl ether **7i** (134 mg,

62% in 2 steps) as colorless oil.

**7i**:  $R_f$  0.52 (EtOAc/hexane = 1/20);  $^1\text{H NMR}$  (600 MHz,  $\text{CDCl}_3$ ):  $\delta$  0.33 (s, 9H), 0.98 (d, 6H,  $J = 7.6$  Hz), 1.06 (d, 6H,  $J = 7.6$  Hz), 1.42 (qq, 2H,  $J = 7.6, 7.6$  Hz), 2.11 (brt, 2H,  $J = 9.0$  Hz), 2.17–2.22 (m, 2H), 3.79 (s, 3H), 4.22 (s, 2H), 5.69–5.72 (m, 1H), 5.89–5.94 (m, 2H), 6.85 (d, 1H,  $J = 8.3$  Hz), 7.53 (d, 1H,  $J = 8.3$  Hz);  $^{13}\text{C NMR}$  (150 MHz,  $\text{CDCl}_3$ ):  $\delta$  0.0, 14.0, 17.6, 18.2, 22.3, 22.8, 55.0, 66.3, 109.1, 117.9, 118.7 (q,  $J_{\text{CF}} = 321$  Hz), 119.5, 124.7, 124.8, 126.2, 138.4, 139.7, 157.4, 166.3; **IR** (neat) 2947, 2866, 1577, 1396, 1203, 1138, 1091, 1045, 906, 837, 810, 779  $\text{cm}^{-1}$ ; **HRMS** (ESI): calcd. for  $\text{C}_{24}\text{H}_{37}\text{F}_3\text{NaO}_5\text{SSi}_2$   $[\text{M}+\text{Na}]^+$ : 573.1745; found: 573.1731.

#### Synthesis of phenol **3j'**

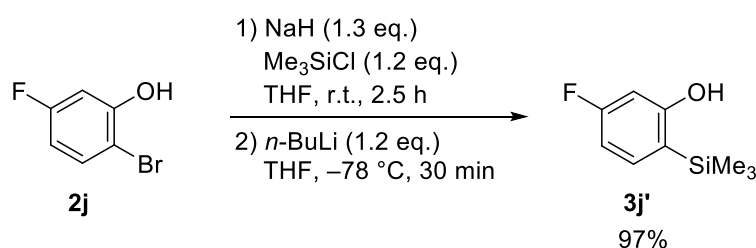

To a solution of 2-bromo-5-fluorophenol (**2j**) (2.0 mL, 18.0 mmol) in THF (54 mL) was added NaH (60% dispersion in mineral oil, 935 mg, 23.4 mmol) at 0 °C. After stirring for 30 min at this temperature, Me<sub>3</sub>SiCl (2.73 mL, 21.6 mmol) was added and the mixture was stirred for 2.5 h at room temperature. The reaction mixture was cooled to  $-78$  °C, to which was added dropwise a solution of *n*-BuLi (1.60 M) in hexane (13.5 mL, 21.6 mmol) over 5 min. After stirring for 30 min at  $-78$  °C, the reaction was quenched by adding saturated aqueous NH<sub>4</sub>Cl, and the mixture was extracted with EtOAc (x3). The combined organic layer was washed with brine, dried (Na<sub>2</sub>SO<sub>4</sub>), and concentrated in vacuo. The residue was purified by flash column chromatography (silica gel, EtOAc/hexane = 1/10) to afford phenol **3j'** (3.20 g, 97%) as colorless oil.

**3j'**:  $R_f$  0.43 (EtOAc/hexane = 1/5);  $^1\text{H NMR}$  (600 MHz,  $\text{CDCl}_3$ ):  $\delta$  0.29 (s, 9H), 5.07 (s, 1H), 6.41 (dd, 1H,  $J_{\text{HF}} = 10.3, J = 2.0$  Hz), 6.63 (ddd, 1H,  $J_{\text{HF}} = 8.2, J = 8.2, 2.0$  Hz), 6.41 (dd, 1H,  $J = 8.2, J_{\text{HF}} = 7.6$  Hz);  $^{13}\text{C NMR}$  (150 MHz,  $\text{CDCl}_3$ ):  $\delta$   $-1.5, 102.4$  (d,  $J_{\text{CF}} = 23$  Hz),  $107.6$  (d,  $J_{\text{CF}} = 19$  Hz),  $121.3, 136.8$  (d,  $J_{\text{CF}} = 8.7$  Hz),  $162.1$  (d,  $J_{\text{CF}} = 10$  Hz),  $165.1$  (d,  $J_{\text{CF}} = 247$  Hz); **IR** (neat): 3595, 2954, 1593, 1500, 1400, 1284, 1246, 1184, 1068, 972, 833, 759  $\text{cm}^{-1}$ ; **HRMS** (FAB): calcd. for  $\text{C}_9\text{H}_{14}\text{FOSi}$   $[\text{M}+\text{H}]^+$ : 185.0792; found: 185.0801.

#### Synthesis of phenol **4j**

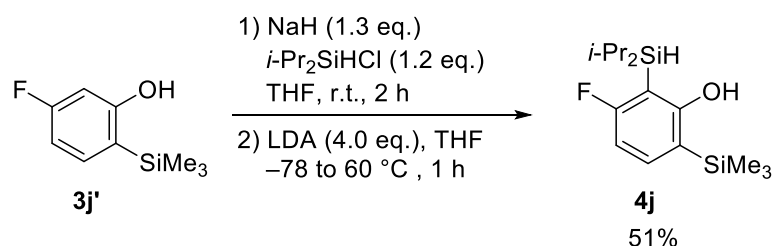

To a solution of **3j'** (783 mg, 4.25 mmol) in THF (20 mL) was added NaH (60% dispersion in mineral oil,



221 mg, 5.52 mmol) at 0 °C. After stirring for 30 min at this temperature, *i*-Pr<sub>2</sub>SiHCl (899 μL, 5.31 mmol) was added and the mixture was stirred for 2 h at room temperature. The reaction mixture was cooled to –78 °C, to which was added dropwise a solution of LDA (1.00 M) in THF (17.0 mL, 17.0 mmol) over 5 min. The mixture was warmed to 60 °C and stirred for 1 h. The reaction was quenched by adding saturated aqueous NH<sub>4</sub>Cl, and the mixture was extracted with EtOAc (x3). The combined organic layer was washed with brine, dried (Na<sub>2</sub>SO<sub>4</sub>), and concentrated in vacuo. The residue was purified by flash column chromatography (silica gel, EtOAc/hexane = 1/100) to afford phenol **4j** (647 mg, 51%) as colorless oil.

**4j**: *R*<sub>f</sub> 0.57 (EtOAc/hexane = 1/100); <sup>1</sup>H NMR (600 MHz, CDCl<sub>3</sub>): δ 0.28 (s, 9H), 1.00 (d, 6H, *J* = 7.6 Hz), 1.10 (d, 6H, *J* = 6.8 Hz), 1.35–1.43 (m, 2H), 4.10 (dt, *J*<sub>HF</sub> = 3.4, *J* = 3.4 Hz), 6.00 (s, 1H), 6.58 (dd, *J*<sub>HF</sub> = 7.6, *J* = 7.6 Hz), 7.35 (dd, *J*<sub>HF</sub> = 7.6, *J* = 7.6 Hz); <sup>13</sup>C NMR (150 MHz, CDCl<sub>3</sub>): δ –1.5, 10.4, 18.2, 18.6, 104.0 (d, *J*<sub>CF</sub> = 35 Hz), 106.5 (d, *J*<sub>CF</sub> = 25 Hz), 120.9, 138.9 (d, *J*<sub>CF</sub> = 10 Hz), 167.3 (d, *J*<sub>CF</sub> = 13 Hz), 169.1 (d, *J*<sub>CF</sub> = 241 Hz); IR (neat): 3529, 2947, 2866, 2506, 1593, 1558, 1462, 1365, 1246, 1188, 991, 837, 736 cm<sup>-1</sup>; HRMS (ESI): calcd. for C<sub>15</sub>H<sub>26</sub>FOSi<sub>2</sub> [M–H]<sup>-</sup>: 297.1512; found: 297.1507.

#### Synthesis of triflate **5j**

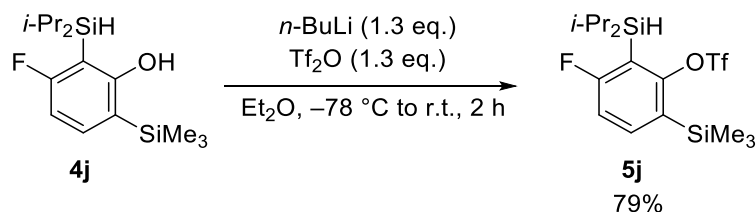

To a solution of **4j** (554 mg, 1.86 mmol) in Et<sub>2</sub>O (20 mL) was added *n*-BuLi (1.6 M) in hexane (1.51 mL, 2.41 mmol) at –78 °C. After stirring for 30 min at this temperature, Tf<sub>2</sub>O (406 μL, 2.41 mmol) was added dropwise to the mixture. The mixture was warmed to room temperature, and the stirring was continued for 2 h. The reaction was quenched by adding saturated aqueous NaHCO<sub>3</sub>, and the mixture was extracted with EtOAc (x3). The combined organic layer was washed with brine, dried (Na<sub>2</sub>SO<sub>4</sub>), and concentrated in vacuo. The residue was purified by flash column chromatography (silica gel, hexane) to afford triflate **5j** (632 mg, 79%) as colorless oil.

**5j**: *R*<sub>f</sub> 0.50 (hexane); <sup>1</sup>H NMR (600 MHz, CDCl<sub>3</sub>): δ 0.36 (s, 9H), 0.95 (d, 6H, *J* = 6.8 Hz), 1.09 (d, 6H, *J* = 6.8 Hz), 1.31–1.37 (m, 2H), 4.10–4.13 (m, 1H), 7.08 (dd, 1H, *J*<sub>HF</sub> = 7.6, *J* = 7.6 Hz), 7.60 (dd, 1H, *J*<sub>HF</sub> = 7.6, *J* = 7.6 Hz); <sup>13</sup>C NMR (150 MHz, CDCl<sub>3</sub>): δ –0.2, 10.8, 18.6, 115.0 (d, *J*<sub>CF</sub> = 25 Hz), 118.7 (q, *J*<sub>CF</sub> = 321 Hz), 118.9 (d, *J*<sub>CF</sub> = 36 Hz), 131.2, 140.0 (d, *J*<sub>CF</sub> = 8.7 Hz), 155.6 (d, *J*<sub>CF</sub> = 14 Hz), 168.1 (d, *J*<sub>CF</sub> = 244 Hz); IR (neat): 2954, 1400, 1219, 1138, 945, 910, 844, 732 cm<sup>-1</sup>; HRMS (FAB): calcd. for C<sub>16</sub>H<sub>27</sub>F<sub>4</sub>O<sub>3</sub>SSi<sub>2</sub> [M+H]<sup>+</sup>: 431.1150; found: 431.1164.

### Synthesis of silyl ether **7j**

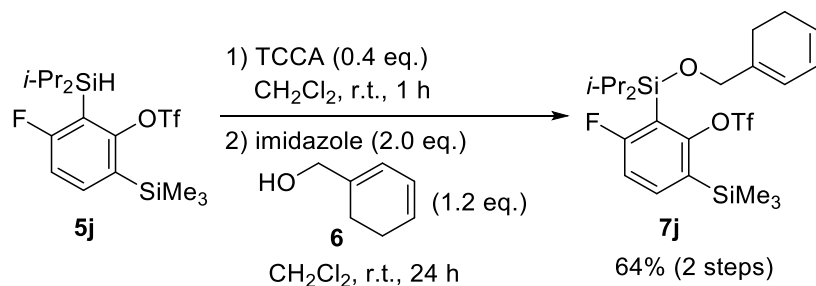

1) To a solution of **5j** (135 mg, 0.314 mmol) in  $CH_2Cl_2$  (3 mL) was added trichloroisocyanuric acid<sup>2</sup> (TCCA, 29.2 mg, 0.126 mmol). After stirring for 1 h at room temperature, the reaction mixture was filtered through a Celite<sup>®</sup> pad (washed with hexane), and the filtrate was concentrated in vacuo to afford the corresponding silyl chloride as colorless oil. This material was employed in the next reaction without further purification.

2) To a solution of the crude material (*vide supra*) in  $CH_2Cl_2$  (3 mL) were added imidazole (42.8 mg, 0.628 mmol) and alcohol **6**<sup>3</sup> (41.5 mg, 0.377 mmol) at 0 °C. After stirring for 24 h at room temperature, the reaction was quenched by adding saturated aqueous  $NaHCO_3$ , and the mixture was extracted with  $CHCl_3$  (x3). The combined organic layer was washed with brine, dried ( $Na_2SO_4$ ), and concentrated in vacuo. The residue was purified by flash column chromatography (silica gel, hexane) to afford silyl ether **7j** (109 mg, 64% in 2 steps) as colorless oil.

**7j**:  $R_f$  0.26 (EtOAc/hexane = 1/100);  $^1H$  NMR (600 MHz,  $CDCl_3$ ):  $\delta$  0.36 (s, 9H), 1.03 (d, 6H,  $J = 7.6$  Hz), 1.09 (d, 6H,  $J = 7.6$  Hz), 1.45 (qdd, 2H,  $J = 7.6, 7.6, J_{HF} = 2.1$  Hz), 2.12 (brt, 2H,  $J = 10.3$  Hz), 2.18–2.22 (m, 2H), 4.24 (s, 2H), 5.70–5.73 (m, 1H), 5.88–5.94 (m, 2H), 7.07 (dd, 1H,  $J_{HF} = 7.6, J = 7.6$  Hz), 7.59 (dd, 1H,  $J_{HF} = 7.6, J = 7.6$  Hz);  $^{13}C$  NMR (150 MHz,  $CDCl_3$ ):  $\delta$  -0.1, 13.8, 17.1, 17.8, 22.3, 22.8, 66.6, 115.0 (d,  $J_{CF} = 26$  Hz), 118.4, 118.68 (q,  $J_{CF} = 321$  Hz), 118.72 (d,  $J_{CF} = 35$  Hz), 124.6, 125.1, 131.1 (d,  $J_{CF} = 4.3$  Hz), 137.8, 139.9 (d,  $J_{CF} = 8.9$  Hz), 156.2 (d,  $J_{CF} = 14$  Hz), 168.0 (d,  $J_{CF} = 246$  Hz); IR (neat) 2951, 2870, 1518, 1400, 1270, 1134, 1099, 937, 840, 733  $cm^{-1}$ ; HRMS (ESI): calcd. for  $C_{23}H_{34}F_4NaO_4SSi_2$   $[M+Na]^+$ : 561.1545; found: 561.1539.

### Synthesis of silyl ether **7k**

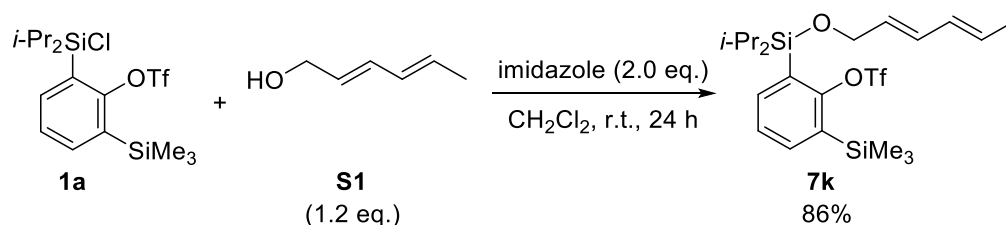

To a solution of **1a** (270 mg, 0.604 mmol) in  $CH_2Cl_2$  (6 mL) were added imidazole (82.2 mg, 1.21 mmol) and alcohol **S1**<sup>5</sup> (71.2 mg, 0.726 mmol) at 0 °C. After stirring for 24 h at room temperature, the reaction was quenched by adding saturated aqueous  $NaHCO_3$ , and the mixture was extracted with  $CHCl_3$  (x3). The combined organic layer was washed with brine, dried ( $Na_2SO_4$ ), and concentrated in vacuo. The residue was purified by flash column chromatography (silica gel, EtOAc/hexane = 1/100) to afford silyl ether **7k** (264

mg, 86%) as colorless oil.

**7k**:  $R_f$  0.64 (EtOAc/hexane = 1/20);  $^1\text{H NMR}$  (500 MHz,  $\text{CDCl}_3$ ):  $\delta$  0.36 (s, 9H), 1.01 (d, 6H,  $J = 7.5$  Hz), 1.12 (d, 6H,  $J = 7.5$  Hz), 1.39 (qq, 2H,  $J = 7.5, 7.5$  Hz), 1.76 (d, 3H,  $J = 6.6$  Hz), 4.24 (d, 2H,  $J = 4.9$  Hz), 5.62–5.72 (m, 2H), 6.05–6.11 (m, 1H), 6.24 (dd, 1H,  $J = 15.2, 10.6$  Hz), 7.37 (dd, 1H,  $J = 7.5, 7.2$  Hz), 7.60–7.63 (m, 2H);  $^{13}\text{C NMR}$  (125 MHz,  $\text{CDCl}_3$ ):  $\delta$  0.3, 13.7, 17.8, 18.1, 18.3, 64.2, 118.5 (q,  $J_{\text{CF}} = 318$  Hz), 127.0, 129.0, 129.4, 130.1, 131.0, 134.8, 138.6, 138.7, 155.5 (several signals overlapped); **IR** (neat) 2951, 2870, 1400, 1215, 1138, 991, 871, 844, 736  $\text{cm}^{-1}$ ; **HRMS** (ESI): calcd. for  $\text{C}_{22}\text{H}_{35}\text{F}_3\text{NaO}_4\text{SSi}_2$   $[\text{M}+\text{Na}]^+$ : 531.1639; found: 531.1642.

### Synthesis of silyl ether **7l**

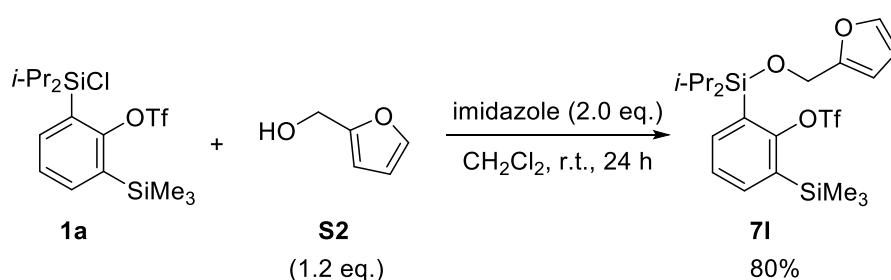

To a solution of **1a** (226 mg, 0.505 mmol) in  $\text{CH}_2\text{Cl}_2$  (5 mL) were added imidazole (68.8 mg, 1.01 mmol) and 2-furfuryl alcohol (**S2**) (52.5  $\mu\text{L}$ , 0.606 mmol) at 0  $^\circ\text{C}$ . After stirring for 24 h at room temperature, the reaction was quenched by adding saturated aqueous  $\text{NaHCO}_3$ , and the mixture was extracted with  $\text{CHCl}_3$  (x3). The combined organic layer was washed with brine, dried ( $\text{Na}_2\text{SO}_4$ ), and concentrated in vacuo. The residue was purified by flash column chromatography (silica gel, EtOAc/hexane = 1/50) to afford silyl ether **7l** (205 mg, 80%) as colorless oil.

**7l**:  $R_f$  0.50 (EtOAc/hexane = 1/10);  $^1\text{H NMR}$  (600 MHz,  $\text{CDCl}_3$ ):  $\delta$  0.36 (s, 9H), 1.02 (d, 6H,  $J = 6.9$  Hz), 1.11 (d, 6H,  $J = 7.6$  Hz), 1.42 (qq, 2H,  $J = 7.6, 6.9$  Hz), 4.68 (s, 2H), 6.26 (d, 1H,  $J = 3.3$  Hz), 6.33 (dd, 1H,  $J = 3.3, 2.0$  Hz), 7.36–7.39 (m, 2H), 7.62 (dd, 1H,  $J = 7.6, 2.1$  Hz), 7.66 (dd, 1H,  $J = 6.8, 2.1$  Hz);  $^{13}\text{C NMR}$  (150 MHz,  $\text{CDCl}_3$ ):  $\delta$  -0.2, 13.2, 17.3, 17.8, 58.6, 107.4, 110.3, 118.2 (q,  $J_{\text{CF}} = 319$  Hz), 127.4, 130.1, 135.2, 139.1, 139.2, 142.4, 154.4, 155.9; **IR** (neat) 2951, 2870, 1396, 1215, 910, 844, 733  $\text{cm}^{-1}$ ; **HRMS** (ESI): calcd. for  $\text{C}_{21}\text{H}_{31}\text{F}_3\text{NaO}_5\text{SSi}_2$   $[\text{M}+\text{Na}]^+$ : 531.1275; found: 531.1284.

### Synthesis of silyl ether **7m**

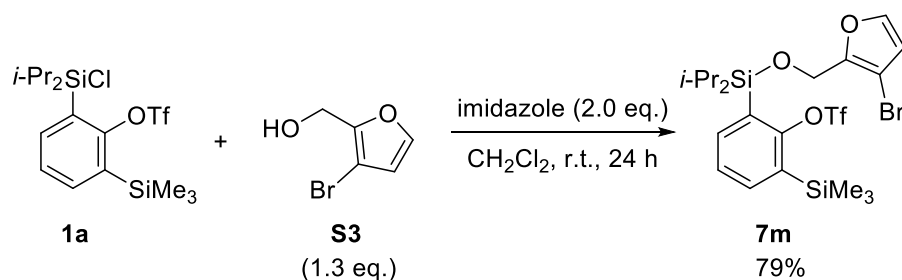

To a solution of **1a** (232 mg, 0.518 mmol) in CH<sub>2</sub>Cl<sub>2</sub> (5 mL) were added imidazole (70.5 mg, 1.04 mmol) and alcohol **S3**<sup>6</sup> (119 mg, 0.673 mmol) at 0 °C. After stirring for 24 h at room temperature, the reaction was quenched by adding saturated aqueous NaHCO<sub>3</sub>, and the mixture was extracted with CHCl<sub>3</sub> (x3). The combined organic layer was washed with brine, dried (Na<sub>2</sub>SO<sub>4</sub>), and concentrated in vacuo. The residue was purified by flash column chromatography (silica gel, EtOAc/hexane = 1/30) to afford silyl ether **7m** (241 mg, 79%) as colorless oil.

**7m**: *R*<sub>f</sub> 0.48 (EtOAc/hexane = 1/10); <sup>1</sup>H NMR (600 MHz, CDCl<sub>3</sub>): δ 0.36 (s, 9H), 1.03 (d, 6H, *J* = 7.6 Hz), 1.12 (d, 6H, *J* = 6.9 Hz), 1.43 (qq, 2H, *J* = 7.6, 6.9 Hz), 4.69 (s, 2H), 6.40 (d, 1H, *J* = 2.0 Hz), 7.37 (d, 1H, *J* = 2.0 Hz), 7.39 (dd, 1H, *J* = 7.6, 7.6 Hz), 7.62 (dd, 1H, *J* = 7.6, 2.1 Hz), 7.68 (dd, 1H, *J* = 7.6, 2.1 Hz); <sup>13</sup>C NMR (150 MHz, CDCl<sub>3</sub>): δ -0.2, 13.2, 17.3, 17.8, 56.2, 98.4, 114.0, 118.7 (q, *J*<sub>CF</sub> = 321 Hz), 127.5, 129.9, 135.2, 139.1, 139.2, 142.9, 150.9, 155.8; IR (neat) 2951, 2870, 1396, 1215, 1138, 867, 844, 733 cm<sup>-1</sup>; HRMS (ESI): calcd. for C<sub>21</sub>H<sub>30</sub>BrF<sub>3</sub>KO<sub>5</sub>SSi<sub>2</sub><sup>+</sup> [M+K]<sup>+</sup>: 625.0120; found: 625.0124.

Synthesis of silyl ether **7n**

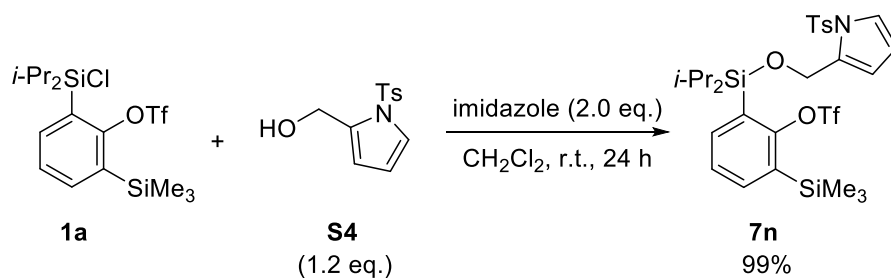

To a solution of **1a** (234 mg, 0.524 mmol) in CH<sub>2</sub>Cl<sub>2</sub> (5 mL) were added imidazole (71.3 mg, 1.05 mmol) and alcohol **S4**<sup>7</sup> (158.1 mg, 0.629 mmol) at 0 °C. After stirring for 24 h at room temperature, the reaction was quenched by adding saturated aqueous NaHCO<sub>3</sub>, and the mixture was extracted with CHCl<sub>3</sub> (x3). The combined organic layer was washed with brine, dried (Na<sub>2</sub>SO<sub>4</sub>), and concentrated in vacuo. The residue was purified by flash column chromatography (silica gel, EtOAc/hexane = 1/20) to afford silyl ether **7n** (343 mg, 99%) as colorless oil.

**7n**: *R*<sub>f</sub> 0.31 (EtOAc/hexane = 1/10); <sup>1</sup>H NMR (600 MHz, CDCl<sub>3</sub>): δ 0.38 (s, 9H), 0.98 (d, 6H, *J* = 7.6 Hz), 1.08 (d, 6H, *J* = 7.6 Hz), 1.39 (qq, 2H, *J* = 7.6, 7.6 Hz), 2.39 (s, 3H), 4.82 (s, 2H), 6.27 (dd, 1H, *J* = 3.4, 3.4 Hz), 6.37 (brs, 1H), 7.20–7.23 (m, 3H), 7.30 (dd, 1H, *J* = 7.6, 7.6 Hz), 7.56–7.64 (m, 4H); <sup>13</sup>C NMR (150 MHz, CDCl<sub>3</sub>) δ -0.2, 13.3, 17.4, 17.9, 21.2, 59.4, 112.1, 112.8, 118.6 (q, *J*<sub>CF</sub> = 321 Hz), 122.7, 126.9, 127.5, 129.9, 130.2, 134.7, 135.3, 136.4, 139.1, 139.2, 145.2, 155.5; IR (neat) 2951, 2870, 1396, 1361, 1215, 1138, 1076, 867, 840, 729 cm<sup>-1</sup>; HRMS (ESI): calcd. for C<sub>28</sub>H<sub>38</sub>F<sub>3</sub>NNaO<sub>6</sub>S<sub>2</sub>Si<sub>2</sub> [M+Na]<sup>+</sup>: 684.1523; found: 684.1526.

### Synthesis of silyl ether **7o**

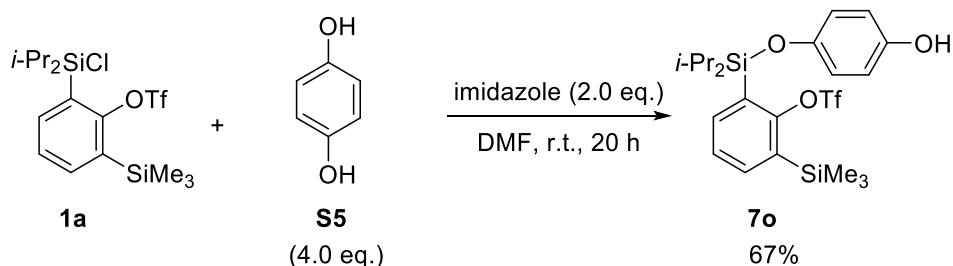

To a solution of **1a** (643 mg, 1.46 mmol) in DMF (15 mL) were added imidazole (199 mg, 2.92 mmol) and hydroquinone (**S5**) (643 mg, 5.84 mmol) at 0 °C. After stirring for 20 h at room temperature, the reaction was quenched by adding saturated aqueous NaHCO<sub>3</sub>, and the mixture was extracted with EtOAc/hexane = 1/2 (x3). The combined organic layer was washed with water (x3), brine, dried (Na<sub>2</sub>SO<sub>4</sub>), and concentrated in vacuo. The residue was purified by flash column chromatography (silica gel, EtOAc/hexane = 1/5) to afford silyl ether **7o** (507 mg, 67%) as pale yellow oil.

**7o**: *R*<sub>f</sub> 0.34 (EtOAc/hexane = 1/5); <sup>1</sup>H NMR (500 MHz, CDCl<sub>3</sub>): δ 0.37 (s, 9H), 1.02 (d, 6H, *J* = 7.8 Hz), 1.09 (d, 6H, *J* = 7.5 Hz), 1.49 (qq, 2H, *J* = 7.8, 7.5 Hz), 4.36 (s, 1H, OH), 6.62–6.69 (m, 4H), 7.40 (dd, 1H, *J* = 7.5, 7.2 Hz), 7.65–7.70 (m, 2H); <sup>13</sup>C NMR (125 MHz, CDCl<sub>3</sub>): δ 0.3, 13.9, 17.6, 18.1, 115.7, 118.4 (q, *J*<sub>CF</sub> = 318 Hz), 120.6, 127.1, 130.0, 135.2, 138.6, 138.9, 149.2, 149.7, 155.0; IR (neat): 3387, 2951, 1508, 1215, 1138, 906, 729 cm<sup>-1</sup>; HRMS (ESI): calcd. for C<sub>22</sub>H<sub>31</sub>F<sub>3</sub>NaO<sub>5</sub>SSi<sub>2</sub> [M+Na]<sup>+</sup>: 543.1275; found: 543.1271.

### Synthesis of silyl ether **19a**

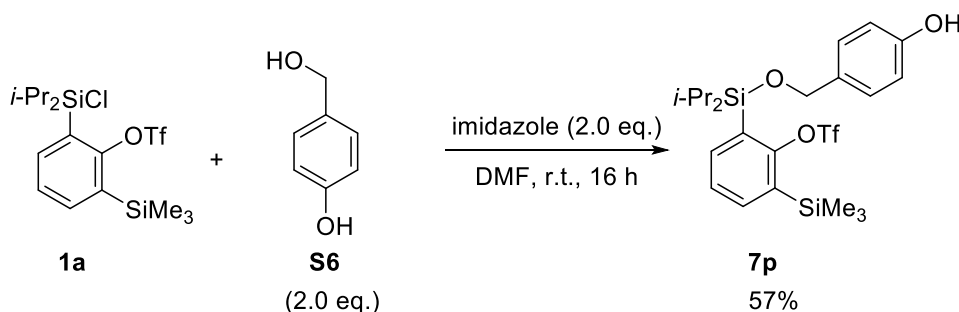

To a solution of **1a** (246 mg, 0.550 mmol) in DMF (5.5 mL) were added imidazole (75 mg, 1.10 mmol) and *p*-hydroxy benzylalcohol (**S6**) (133 mg, 1.10 mmol) at 0 °C. After stirring for 16 h at room temperature, the reaction was quenched by adding saturated aqueous NaHCO<sub>3</sub>, and the mixture was extracted with EtOAc/hexane = 1/2 (x3). The combined organic layer was washed with water (x3), brine, dried (Na<sub>2</sub>SO<sub>4</sub>), and concentrated in vacuo. The residue was purified by flash column chromatography (silica gel, EtOAc/hexane = 1/10) to afford silyl ether **7p** (166 mg, 57%) as pale yellow oil.

**7p**: *R*<sub>f</sub> 0.25 (EtOAc/hexane = 1/5); <sup>1</sup>H NMR (500 MHz, CDCl<sub>3</sub>): δ 0.37 (s, 9H), 1.03 (d, 6H, *J* = 7.5 Hz), 1.13 (d, 6H, *J* = 7.5 Hz), 1.43 (qq, 2H, *J* = 7.5, 7.5 Hz), 3.75 (s, 1H), 4.71 (s, 2H), 6.82 (d, 2H, *J* = 8.6 Hz), 7.23 (d, 2H, *J* = 8.6 Hz), 7.35 (dd, 1H, *J* = 7.5, 7.2 Hz), 7.61–7.63 (m, 2H); <sup>13</sup>C NMR (150 MHz, CDCl<sub>3</sub>): δ -0.2, 13.3, 17.5, 18.0, 65.0, 115.2, 118.6 (q, *J*<sub>CF</sub> = 319 Hz), 127.4, 127.7, 130.3, 133.6, 135.2, 139.0, 139.2, 155.0, 155.8; IR (neat): 3394, 2951, 2870, 1512, 1396, 1215, 1138, 910, 871, 844, 736 cm<sup>-1</sup>; HRMS (ESI):

calcd. for  $C_{23}H_{33}F_3NaO_5SSi_2$   $[M+Na]^+$ : 557.1432; found: 557.1433.

#### Synthesis of silyl ether **9a**

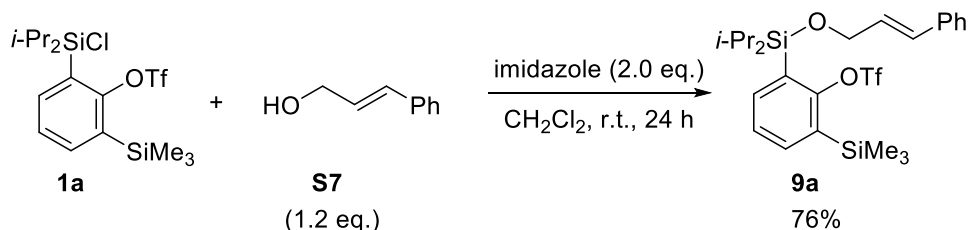

To a solution of **1a** (432 mg, 0.966 mmol) in  $\text{CH}_2\text{Cl}_2$  (10 mL) were added imidazole (132 mg, 1.93 mmol) and cinnamyl alcohol (**S7**) (156 mg, 1.16 mmol) at  $0^\circ\text{C}$ . After stirring for 24 h at room temperature, the reaction was quenched by adding saturated aqueous  $\text{NaHCO}_3$ , and the mixture was extracted with  $\text{CHCl}_3$  (x3). The combined organic layer was washed with brine, dried ( $\text{Na}_2\text{SO}_4$ ), and concentrated in vacuo. The residue was purified by flash column chromatography (silica gel,  $\text{EtOAc}/\text{hexane} = 1/50$ ) to afford silyl ether **9a** (402 mg, 76%) as colorless oil.

**9a**:  $R_f$  0.59 ( $\text{EtOAc}/\text{hexane} = 1/10$ );  $^1\text{H NMR}$  (500 MHz,  $\text{CDCl}_3$ ):  $\delta$  0.37 (s, 9H), 1.04 (d, 6H,  $J = 7.8$  Hz), 1.16 (d, 6H,  $J = 7.5$  Hz), 1.43 (qq, 2H,  $J = 7.8, 7.5$  Hz), 4.40 (dd, 2H,  $J = 4.9, 1.7$  Hz), 6.31 (dt, 1H,  $J = 15.8, 4.9$  Hz), 6.66 (dt, 1H,  $J = 15.8, 1.7$  Hz), 7.23 (tt, 1H,  $J = 7.5, 2.0$  Hz), 7.30–7.34 (m, 2H), 7.37–7.40 (m, 3H), 7.63 (dd, 1H,  $J = 7.2, 2.0$  Hz), 7.65 (dd, 1H,  $J = 7.2, 2.0$  Hz);  $^{13}\text{C NMR}$  (125 MHz,  $\text{CDCl}_3$ ):  $\delta$  0.3, 13.7, 17.9, 18.3, 64.4, 118.5 (q,  $J_{\text{CF}} = 318$  Hz), 126.4, 127.1, 127.3, 128.5, 128.7, 129.4, 130.0, 134.9, 137.1, 138.66, 138.67, 155.5; **IR** (neat): 2951, 1396, 1215, 1138, 964, 906, 871, 841, 779  $\text{cm}^{-1}$ ; **HRMS** (ESI): calcd. for  $C_{25}H_{35}F_3NaO_4SSi_2$   $[M+Na]^+$ : 567.1639; found: 567.1657.

#### Synthesis of silyl ether **9b**

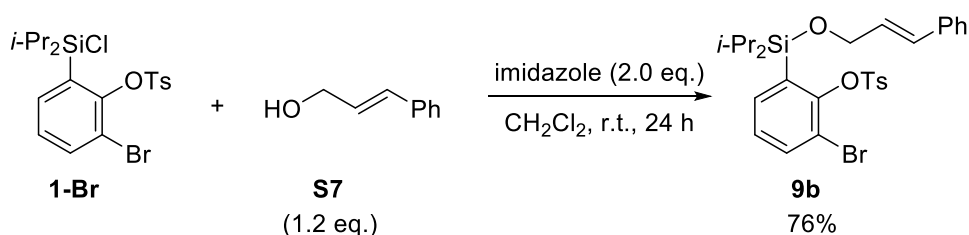

To a solution of **1-Br**<sup>8</sup> (309 mg, 0.651 mmol) in  $\text{CH}_2\text{Cl}_2$  (6.5 mL) were added imidazole (88.6 mg, 1.30 mmol) and cinnamyl alcohol (**S7**) (105 mg, 0.781 mmol) at  $0^\circ\text{C}$ . After stirring for 24 h at room temperature, the reaction was quenched by adding saturated aqueous  $\text{NaHCO}_3$ , and the mixture was extracted with  $\text{CHCl}_3$  (x3). The combined organic layer was washed with brine, dried ( $\text{Na}_2\text{SO}_4$ ), and concentrated in vacuo. The residue was purified by flash column chromatography (silica gel,  $\text{EtOAc}/\text{hexane} = 1/20$ ) to afford silyl ether **9b** (263 mg, 70%) as a white solid.

**9b**: mp: 74–79  $^\circ\text{C}$ ;  $R_f$  0.53 ( $\text{EtOAc}/\text{hexane} = 1/5$ );  $^1\text{H NMR}$  (600 MHz,  $\text{CDCl}_3$ ):  $\delta$  1.09 (d, 6H,  $J = 7.6$  Hz), 1.21 (d, 6H,  $J = 6.9$  Hz), 1.65 (qq, 2H,  $J = 7.6, 6.9$  Hz), 2.46 (s, 3H), 4.45 (dd, 2H,  $J = 4.1, 1.4$  Hz), 6.33 (dt,

1H,  $J = 15.8, 4.1$  Hz), 6.69 (brd, 1H,  $J = 15.8$  Hz), 7.15 (dd, 1H,  $J = 7.6, 7.6$  Hz), 7.23 (t, 1H,  $J = 6.9$  Hz), 7.30–7.35 (m, 4H), 7.40 (d, 2H,  $J = 7.6$  Hz), 7.56 (dd, 1H,  $J = 7.6, 1.4$  Hz), 7.62 (dd, 1H,  $J = 7.6, 1.4$  Hz), 7.85 (d, 2H,  $J = 7.6$  Hz);  $^{13}\text{C NMR}$  (150 MHz,  $\text{CDCl}_3$ ):  $\delta$  13.4, 17.6, 18.1, 21.4, 64.4, 117.8, 126.7, 127.6, 128.0, 128.8, 128.9, 129.2, 129.5, 129.8, 134.3, 134.8, 135.8, 136.7, 137.4, 145.6, 150.7; **IR** (neat): 2943, 2866, 1373, 1168, 1072, 964, 856, 718  $\text{cm}^{-1}$ ; **HRMS** (ESI): calcd. for  $\text{C}_{28}\text{H}_{33}\text{BrNaO}_4\text{SSi}$   $[\text{M}+\text{Na}]^+$ : 595.0944; found: 595.0958.

#### Synthesis of silyl ether **11a**

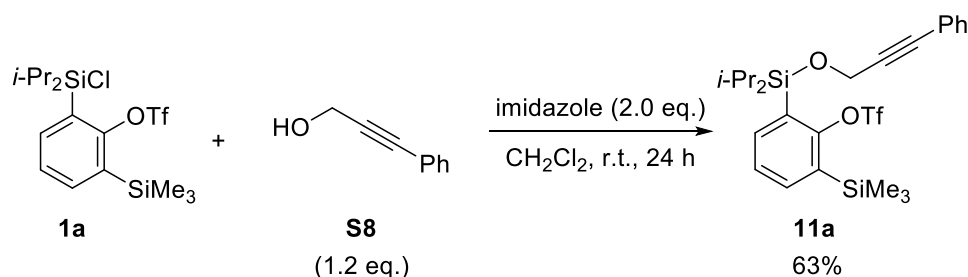

To a solution of **1a** (240 mg, 0.537 mmol) in  $\text{CH}_2\text{Cl}_2$  (5 mL) were added imidazole (73.1 mg, 1.07 mmol) and 3-phenyl-2-propyn-1-ol (**S8**) (80.3  $\mu\text{L}$ , 0.644 mmol) at  $0^\circ\text{C}$ . After stirring for 24 h at room temperature, the reaction was quenched by adding saturated aqueous  $\text{NaHCO}_3$ , and the mixture was extracted with  $\text{CHCl}_3$  (x3). The combined organic layer was washed with brine, dried ( $\text{Na}_2\text{SO}_4$ ), and concentrated in vacuo. The residue was purified by flash column chromatography (silica gel,  $\text{EtOAc}/\text{hexane} = 1/50$ ) to afford silyl ether **11a** (184 mg, 63%) as colorless oil.

**11a**:  $R_f$  0.57 ( $\text{EtOAc}/\text{hexane} = 1/10$ );  $^1\text{H NMR}$  (500 MHz,  $\text{CDCl}_3$ ):  $\delta$  0.35 (s, 9H), 1.07 (d, 6H,  $J = 7.5$  Hz), 1.17 (d, 6H,  $J = 7.5$  Hz), 1.46 (qq, 2H,  $J = 7.5, 7.5$  Hz), 4.60 (s, 2H), 7.28–7.32 (m, 3H), 7.35–7.41 (m, 3H), 7.62 (dd, 1H,  $J = 7.2, 1.8$  Hz), 7.69 (dd, 1H,  $J = 7.5, 1.8$  Hz);  $^{13}\text{C NMR}$  (125 MHz,  $\text{CDCl}_3$ ):  $\delta$  0.3, 13.6, 17.7, 18.1, 52.9, 85.1, 87.5, 118.5 (q,  $J_{\text{CF}} = 318$  Hz), 122.9, 127.1, 128.2, 129.7, 131.5, 134.9, 138.6, 138.7, 155.6 (several signals overlapped); **IR** (neat): 2951, 2870, 1396, 1219, 1138, 906, 732  $\text{cm}^{-1}$ ; **HRMS** (ESI): calcd. for  $\text{C}_{25}\text{H}_{35}\text{F}_3\text{NaO}_4\text{SSi}_2$   $[\text{M}+\text{Na}]^+$ : 565.1482; found: 565.1493.

#### Synthesis of silyl ether **11b**

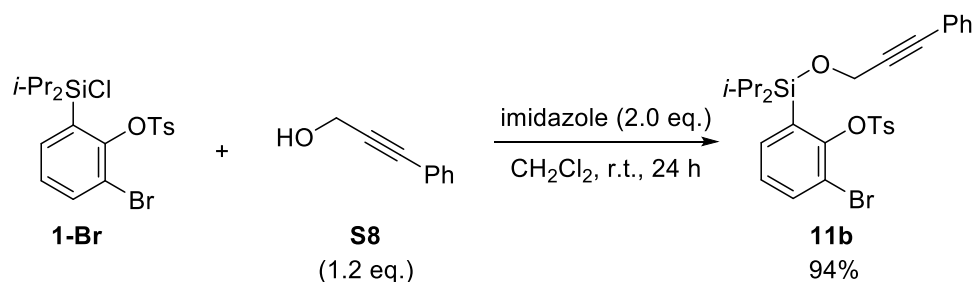

To a solution of **1-Br**<sup>8</sup> (192 mg, 0.404 mmol) in  $\text{CH}_2\text{Cl}_2$  (4 mL) were added imidazole (55.0 mg, 0.808 mmol) and 3-phenyl-2-propyn-1-ol (**S8**) (60.5  $\mu\text{L}$ , 0.485 mmol) at  $0^\circ\text{C}$ . After stirring for 24 h at room temperature,

the reaction was quenched by adding saturated aqueous NaHCO<sub>3</sub>, and the mixture was extracted with CHCl<sub>3</sub> (x3). The combined organic layer was washed with brine, dried (Na<sub>2</sub>SO<sub>4</sub>), and concentrated in vacuo. The residue was purified by flash column chromatography (silica gel, EtOAc/hexane = 1/20) to afford **11b** (217 mg, 94%) as a white solid.

**11b**: mp: 110–113 °C; *R*<sub>f</sub> 0.42 (EtOAc/hexane = 1/10); <sup>1</sup>H NMR (600 MHz, CDCl<sub>3</sub>): δ 1.11 (d, 6H, *J* = 7.6 Hz), 1.22 (d, 6H, *J* = 7.6 Hz), 1.65 (qq, 2H, *J* = 7.6, 7.6 Hz), 2.47 (s, 3H), 4.64 (s, 2H), 7.17 (dd, 1H, *J* = 7.6, 7.6 Hz), 7.28–7.32 (m, 3H), 7.33 (d, 2H, *J* = 8.3 Hz), 7.38–7.42 (m, 2H), 7.55 (dd, 1H, *J* = 7.6, 2.1 Hz), 7.70 (dd, 1H, *J* = 7.6, 2.1 Hz), 7.85 (d, 2H, *J* = 8.3 Hz); <sup>13</sup>C NMR (150 MHz, CDCl<sub>3</sub>): δ 13.3, 17.5, 17.9, 21.4, 53.0, 85.0, 87.8, 117.8, 123.2, 128.0, 128.5, 128.9, 129.8, 131.9, 134.0, 134.8, 135.9, 136.8, 145.6, 150.8 (several signals overlapped); IR (neat): 2947, 2866, 1369, 1168, 1072, 910, 856, 713 cm<sup>-1</sup>; HRMS (ESI): calcd. for C<sub>28</sub>H<sub>31</sub>BrNaO<sub>4</sub>SSi [M+Na]<sup>+</sup>: 593.0788; found: 593.0800.

#### Synthesis of ester **S11**

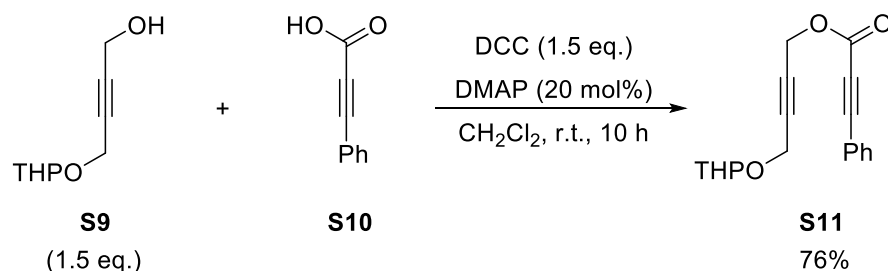

To a solution of **S9** (2.01 g, 11.8 mmol) and phenylpropionic acid (**S10**) (1.15g, 7.87 mmol) in CH<sub>2</sub>Cl<sub>2</sub> (30 mL) were added DCC (2.43 g, 11.8 mmol) and DMAP (192 mg, 1.57 mmol) at 0 °C. After stirring for 10 h at room temperature, the reaction was quenched by water, and the mixture was extracted with CHCl<sub>3</sub> (x3). The combined organic layer was washed with 5% HCl (x1), saturated aqueous NaHCO<sub>3</sub> (x1) and brine (x1), dried (Na<sub>2</sub>SO<sub>4</sub>), and concentrated in vacuo. The residue was purified by flash column chromatography (silica gel, EtOAc/hexane = 1/10) to afford ester **S11** (1.79 g, 76%) as colorless oil.

**S11**: *R*<sub>f</sub> 0.31 (EtOAc/hexane = 1/5); <sup>1</sup>H NMR (600 MHz, CDCl<sub>3</sub>): δ 1.50–1.67 (m, 4H), 1.73–1.78 (m, 1H), 1.80–1.87 (m, 1H), 3.52–3.57 (m, 1H), 3.81–3.86 (m, 1H), 4.28 (dt, 1H, *J* = 16.5, 2.0 Hz), 4.36 (dt, 1H, *J* = 16.5, 2.0 Hz), 4.81 (t, 1H, *J* = 3.4 Hz), 4.88 (t, 2H, *J* = 1.4 Hz), 7.38 (dd, 2H, *J* = 7.6, 7.6 Hz), 7.46 (t, 1H, *J* = 7.6 Hz), 7.59 (d, 2H, *J* = 7.6 Hz); <sup>13</sup>C NMR (150 MHz, CDCl<sub>3</sub>): δ 18.5, 24.9, 29.8, 53.4, 53.9, 61.7, 78.9, 79.8, 83.8, 87.4, 96.9, 119.4, 128.8, 131.1, 133.3, 153.5; IR (neat): 2943, 2854, 2218, 1712, 1280, 1161, 1022, 902, 744 cm<sup>-1</sup>; HRMS (ESI): calcd. for C<sub>18</sub>H<sub>18</sub>NaO<sub>4</sub> [M+Na]<sup>+</sup>: 321.1097; found: 321.1082.



### Synthesis of alcohol **13**

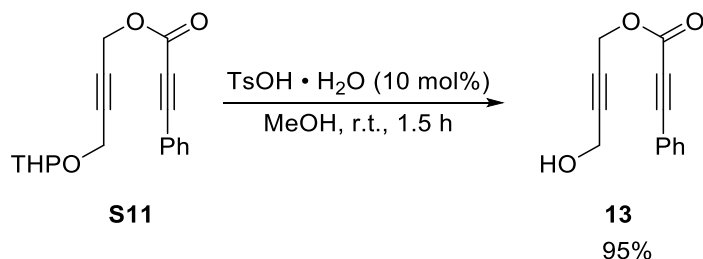

To a solution of **13** (1.34 g, 4.69 mmol) in MeOH (10 mL) was added TsOH · H<sub>2</sub>O (89.2 mg, 0.469 mmol) at 0 °C. After stirring for 1.5 h at room temperature, the reaction was quenched by saturated aqueous NaHCO<sub>3</sub>, and the mixture was extracted with EtOAc(x3). The combined organic layer was washed with brine, dried (Na<sub>2</sub>SO<sub>4</sub>), and concentrated in vacuo. The residue was purified by flash column chromatography (silica gel, EtOAc/hexane = 1/2) to afford alcohol **13** (0.956 g, 95%) as colorless oil.

**13**: *R*<sub>f</sub>: 0.45 (EtOAc/hexane = 1/1); <sup>1</sup>H NMR (600 MHz, CDCl<sub>3</sub>): δ 1.65 (brs, 1H), 4.34 (d, 2H, *J* = 5.6 Hz), 4.87 (s, 2H), 7.38 (dd, 2H, *J* = 7.6, 7.6 Hz), 7.47 (t, 1H, *J* = 7.6 Hz), 7.59 (d, 2H, *J* = 7.6 Hz); <sup>13</sup>C NMR (150 MHz, CDCl<sub>3</sub>): δ 50.4, 54.4, 78.4, 79.7, 86.0, 87.6, 119.2, 128.8, 131.1, 133.2, 153.6; IR (neat): 3383, 2218, 1708, 1280, 1165, 1018, 968, 906, 729 cm<sup>-1</sup>; HRMS (ESI): calcd. for C<sub>13</sub>H<sub>10</sub>NaO<sub>3</sub> [M+Na]<sup>+</sup>: 237.0522; found: 237.0525.

### Synthesis of silyl ether **14**

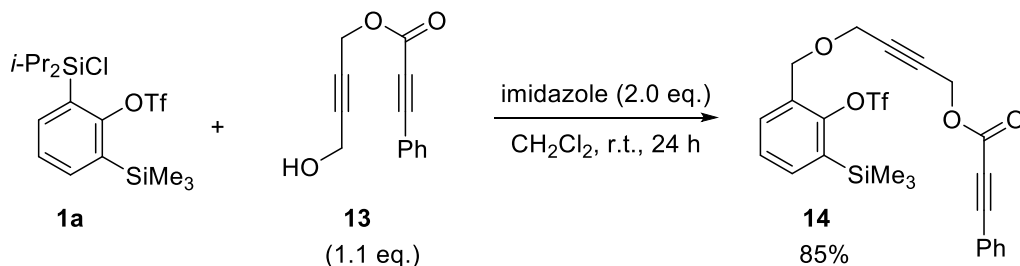

To a solution of **1a** (401 mg, 0.899 mmol) in CH<sub>2</sub>Cl<sub>2</sub> (9 mL) were added imidazole (122 mg, 1.80 mmol) and alcohol **13** (212 mg, 0.989 mmol) at 0 °C. After stirring for 24 h at room temperature, the reaction was quenched by adding saturated aqueous NaHCO<sub>3</sub>, and the mixture was extracted with CHCl<sub>3</sub> (x3). The combined organic layer was washed with brine, dried (Na<sub>2</sub>SO<sub>4</sub>), and concentrated in vacuo. The residue was purified by flash column chromatography (silica gel, EtOAc/hexane = 1/100) to afford **14** (478 mg, 85%) as colorless oil.

**14**: *R*<sub>f</sub>: 0.48 (EtOAc/hexane = 1/5); <sup>1</sup>H NMR (500 MHz, CDCl<sub>3</sub>): δ 0.36 (s, 9H), 1.04 (d, 6H, *J* = 7.5 Hz), 1.14 (d, 6H, *J* = 7.5 Hz), 1.43 (qq, 2H, *J* = 7.5, 7.5 Hz), 4.12 (t, 2H, *J* = 1.7 Hz), 4.85 (t, 2H, *J* = 1.7 Hz), 7.37–7.43 (m, 3H), 7.47 (tt, 1H, *J* = 7.5, 1.5 Hz), 7.58–7.66 (m, 4H); <sup>13</sup>C NMR (125 MHz, CDCl<sub>3</sub>): δ -0.2, 13.1, 17.3, 17.7, 52.2, 53.4, 78.1, 79.9, 86.0, 87.4, 118.7 (q, *J*<sub>CF</sub> = 320 Hz), 119.6, 127.5, 128.9, 129.7, 131.2, 133.4, 135.3, 138.9, 139.2, 153.6, 155.9; IR (neat) 2966, 1716, 1396, 1219, 1138, 910, 871, 844, 733 cm<sup>-1</sup>; HRMS (ESI): calcd. for C<sub>29</sub>H<sub>35</sub>F<sub>3</sub>NaO<sub>6</sub>SSi<sub>2</sub> [M+Na]<sup>+</sup>: 647.1543; found: 647.1545.

## 2-2. Synthesis of cycloadducts

Typical procedure: Synthesis of cycloadduct **8a**

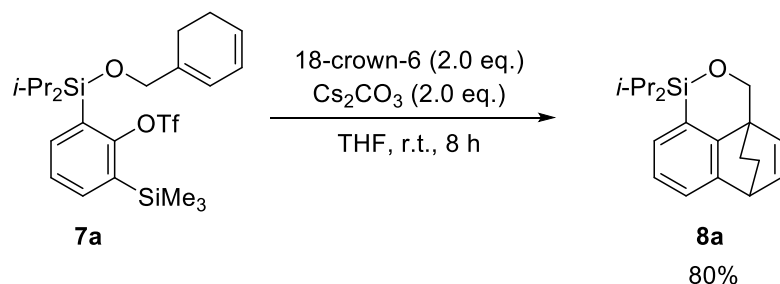

A flame-dried two-necked flask charged with 18-crown-6 (89.1 mg, 0.337 mmol) was evacuated (1 mmHg) at room temperature for 1 h, to which were added **6a** (87.8 mg, 0.168 mmol) and THF (3 mL). To the mixture was added Cs<sub>2</sub>CO<sub>3</sub> (110 mg, 0.337 mmol) and stirred for 8 h at room temperature. The reaction was quenched by adding saturated aqueous NH<sub>4</sub>Cl and the mixture was extracted with EtOAc (x3). The combined organic layers were washed with brine, dried (Na<sub>2</sub>SO<sub>4</sub>), and concentrated in vacuo. The residue was purified by flash column chromatography (silica gel, EtOAc/hexane = 1/100) to afford cycloadduct **8a** (40.0 mg, 80%) as colorless oil.

**8a**: *R*<sub>f</sub> 0.43 (EtOAc/hexane = 1/10); Spectral data matched those reported in the literature.<sup>8</sup>

Synthesis of cycloadduct **8b**

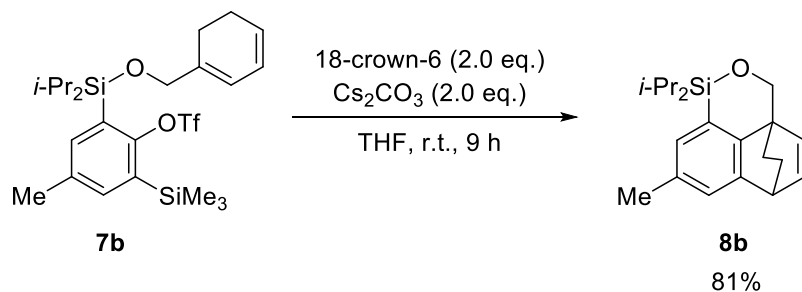

According to the typical procedure, **8b** was prepared from the reaction of 18-crown-6 (96.2 mg, 0.364 mmol), **7b** (97.3 mg, 0.182 mmol) in THF (3 mL) and Cs<sub>2</sub>CO<sub>3</sub> (119 mg, 0.364 mmol) at room temperature for 9 h. Purification by flash column chromatography (silica gel, EtOAc/hexane = 1/100) afforded cycloadduct **8b** (46.2 mg, 81%) as colorless oil.

**8b**: *R*<sub>f</sub> 0.48 (EtOAc/hexane = 1/20); <sup>1</sup>H NMR (600 MHz, CDCl<sub>3</sub>): δ 0.96 (d, 3H, *J* = 7.6 Hz), 1.00 (d, 3H, *J* = 7.6 Hz), 1.10 (d, 3H, *J* = 7.6 Hz), 1.13 (d, 3H, *J* = 7.6 Hz), 1.15–1.20 (m, 1H), 1.29 (qq, 1H, *J* = 7.6, 7.6 Hz), 1.36(ddd, 1H, *J* = 10.3, 10.3, 4.9 Hz), 1.43–1.50 (m, 1H), 1.62–1.72 (m, 2H), 2.31 (s, 3H), 3.83–3.86 (m, 1H), 4.28 (d, 1H, *J* = 11.7 Hz), 4.57 (d, 1H, *J* = 11.7 Hz), 6.05 (d, 1H, *J* = 7.6 Hz), 6.55 (dd, 1H, *J* = 7.6, 7.6 Hz), 7.00 (s, 1H), 7.02 (s, 1H); <sup>13</sup>C NMR (150 MHz, CDCl<sub>3</sub>): δ 12.2, 12.9, 16.9, 17.0, 17.2, 17.6, 21.0, 27.2, 29.9, 40.7, 44.6, 68.2, 124.9, 126.4, 130.2, 133.6, 136.1, 136.2, 144.4, 148.5; IR (neat): 2947, 2866, 2337, 1462, 1207, 906, 779, 733 cm<sup>-1</sup>; HRMS (ESI): calcd. for C<sub>20</sub>H<sub>29</sub>OSi [M+H]<sup>+</sup>: 313.1982; found: 313.1963.

### Synthesis of cycloadduct **8c**

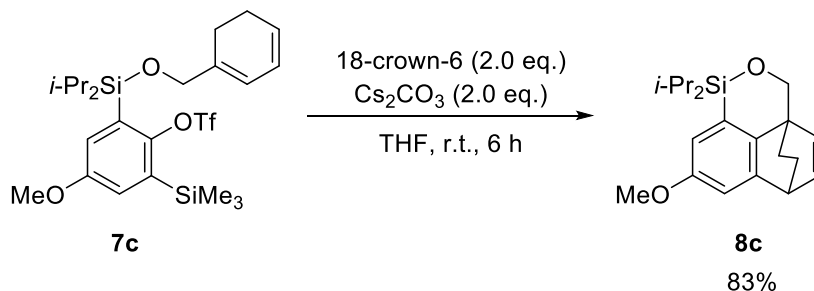

According to the typical procedure, **8c** was prepared from the reaction of 18-crown-6 (131 mg, 0.495 mmol), **7c** (136 mg, 0.247 mmol) in THF (4 mL) and  $\text{Cs}_2\text{CO}_3$  (161 mg, 0.495 mmol) at room temperature for 6 h. Purification by flash column chromatography (EtOAc/hexane = 1/50) afforded cycloadduct **8c** (67.4 mg, 83%) as colorless oil.

**8c**:  $R_f$  0.52 (EtOAc/hexane = 1/10); Spectral data matched those reported in the literature.<sup>8</sup>

### Synthesis of cycloadduct **8d**

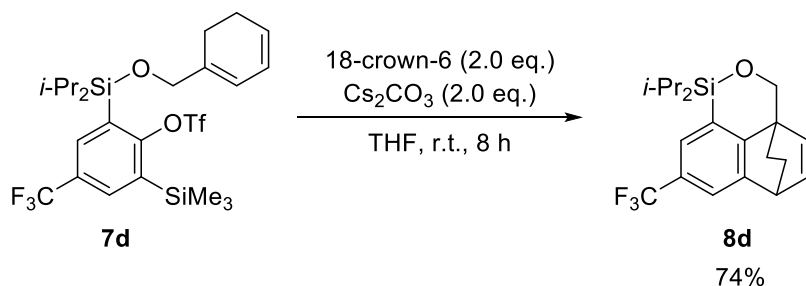

According to the typical procedure, **8d** was prepared from the reaction of 18-crown-6 (129 mg, 0.489 mmol), **7d** (144 mg, 0.244 mmol) in THF (4 mL) and  $\text{Cs}_2\text{CO}_3$  (159 mg, 0.489 mmol) at room temperature for 8 h. Purification by flash column chromatography (silica gel, EtOAc/hexane = 1/50) afforded cycloadduct **8d** (66.1 mg, 74%) as colorless oil.

**8d**:  $R_f$  0.47 (EtOAc/hexane = 1/20);  $^1\text{H NMR}$  (600 MHz,  $\text{CDCl}_3$ ):  $\delta$  0.95 (d, 3H,  $J = 6.9$  Hz), 1.01 (d, 3H,  $J = 7.6$  Hz), 1.10 (d, 3H,  $J = 7.6$  Hz), 1.14 (d, 3H,  $J = 7.6$  Hz), 1.20 (qq, 1H,  $J = 7.6, 6.9$  Hz), 1.32 (qq, 1H,  $J = 7.6, 7.6$  Hz), 1.42 (ddd, 1H,  $J = 10.3, 10.3, 4.1$  Hz), 1.46–1.52 (m, 1H), 1.66–1.73 (m, 2H), 3.97–4.01 (m, 1H), 4.32 (d, 1H,  $J = 11.6$  Hz), 4.60 (d, 1H,  $J = 11.6$  Hz), 6.06 (d, 1H,  $J = 6.9$  Hz), 6.59 (dd, 1H,  $J = 6.9, 6.2$  Hz), 7.42 (s, 1H), 7.43 (s, 1H);  $^{13}\text{C NMR}$  (150 MHz,  $\text{CDCl}_3$ ):  $\delta$  12.1, 12.8, 16.8, 16.9, 17.1, 17.5, 26.8, 29.4, 40.7, 45.1, 67.9, 120.3 (q,  $J_{\text{CF}} = 4.3$  Hz), 125.0 (q,  $J_{\text{CF}} = 273$  Hz), 126.5 (q,  $J_{\text{CF}} = 2.9$  Hz), 126.6 (q,  $J_{\text{CF}} = 32$  Hz), 127.7, 135.5, 136.1, 144.8, 155.3; **IR** (neat): 2947, 2866, 2360, 1334, 1311, 1122, 1053, 906, 729  $\text{cm}^{-1}$ ; **HRMS** (ESI): calcd. for  $\text{C}_{20}\text{H}_{26}\text{F}_3\text{OSi}$   $[\text{M}+\text{H}]^+$ : 367.1700; found: 367.1713.

### Synthesis of cycloadduct **8e**

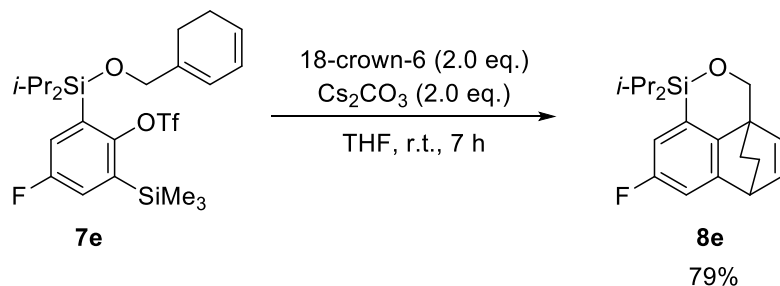

According to the typical procedure, **8e** was prepared from the reaction of 18-crown-6 (235 mg, 0.889 mmol), **7e** (240 mg, 0.445 mmol) in THF (7.5 mL) and  $\text{Cs}_2\text{CO}_3$  (290 mg, 0.889 mmol) at room temperature for 7 h. Purification by flash column chromatography (EtOAc/hexane = 1/50) afforded cycloadduct **8e** (111 mg, 79%) as colorless oil.

**8e**:  $R_f$  0.60 (EtOAc/hexane = 1/20); Spectral data matched those reported in the literature.<sup>8</sup>

### Synthesis of cycloadduct **8f**

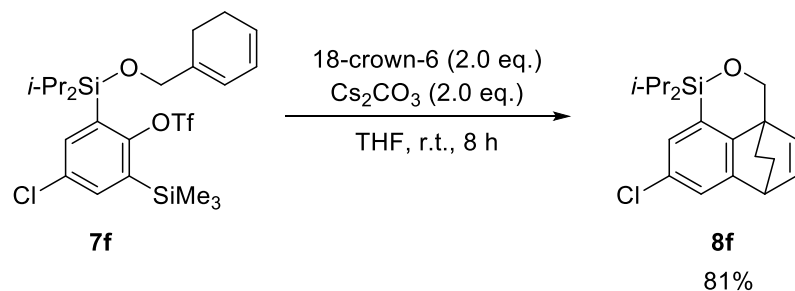

According to the typical procedure, **8f** was prepared from the reaction of 18-crown-6 (86.3 mg, 0.326 mmol), **7f** (90.6 mg, 0.163 mmol) in THF (3 mL) and  $\text{Cs}_2\text{CO}_3$  (106.2 mg, 0.326 mmol) at room temperature for 8 h. Purification by flash column chromatography (silica gel, EtOAc/hexane = 1/50) to afford cycloadduct **8f** (44.1 mg, 81%) as colorless oil.

**8f**:  $R_f$  0.59 (EtOAc/hexane = 1/10);  $^1\text{H NMR}$  (600 MHz,  $\text{CDCl}_3$ ):  $\delta$  0.95 (d, 3H,  $J = 7.6$  Hz), 1.01 (d, 3H,  $J = 7.6$  Hz), 1.10 (d, 3H,  $J = 7.6$  Hz), 1.13 (d, 3H,  $J = 6.8$  Hz), 1.17 (qq, 1H,  $J = 7.6, 7.6$  Hz), 1.29 (qq, 1H,  $J = 7.6, 6.8$  Hz), 1.37 (ddd, 1H,  $J = 10.3, 10.3, 5.5$  Hz), 1.44–1.50 (m, 1H), 1.64–1.70 (m, 2H), 3.87–3.90 (m, 1H), 4.28 (d, 1H,  $J = 11.7$  Hz), 4.56 (d, 1H,  $J = 11.7$  Hz), 6.04 (d, 1H,  $J = 6.9$  Hz), 6.55 (dd, 1H,  $J = 6.9, 6.2$  Hz), 7.14 (d, 1H,  $J = 2.0$  Hz), 7.17 (d, 1H,  $J = 2.0$  Hz);  $^{13}\text{C NMR}$  (150 MHz,  $\text{CDCl}_3$ ):  $\delta$  12.1, 12.8, 16.8, 16.9, 17.1, 17.5, 26.9, 29.6, 40.5, 44.7, 68.0, 124.1, 128.97, 129.01, 130.7, 135.8, 136.0, 146.5, 149.6; **IR** (neat): 2943, 2866, 1462, 1196, 1138, 1056, 991, 883, 779  $\text{cm}^{-1}$ ; **HRMS** (ESI): calcd. for  $\text{C}_{19}\text{H}_{26}\text{ClOSi}$   $[\text{M}+\text{H}]^+$ : 333.1436; found: 333.1450.

### Synthesis of cycloadduct **8g**

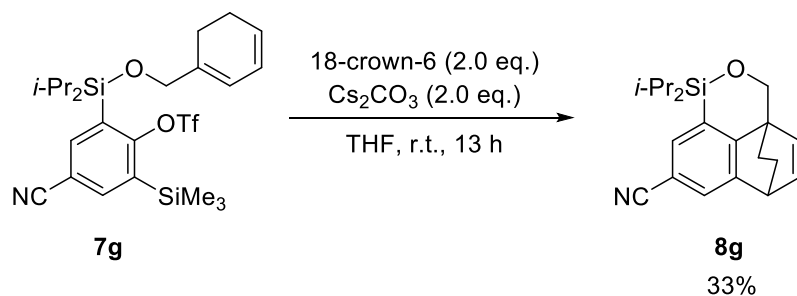

According to the typical procedure, **8g** was prepared from the reaction of 18-crown-6 ether (34.9 mg, 0.132 mmol), **7g** (36.0 mg, 0.0660 mmol) in THF (1.1 mL) and Cs<sub>2</sub>CO<sub>3</sub> (43.0 mg, 0.132 mmol) at room temperature for 13 h. Purification by PTLC (EtOAc/hexane = 1/30 x3) afforded cycloadduct **8g** (7.0 mg, 33%) as colorless oil.

**8g**: *R*<sub>f</sub> 0.50 (EtOAc/hexane = 1/5); <sup>1</sup>H NMR (600 MHz, CDCl<sub>3</sub>): δ 0.94 (d, 3H, *J* = 7.6 Hz), 1.01 (d, 3H, *J* = 7.6 Hz), 1.09 (d, 3H, *J* = 7.6 Hz), 1.13 (d, 3H, *J* = 7.6 Hz), 1.20 (qq, 1H, *J* = 7.6, 7.6 Hz), 1.31 (qq, 1H, *J* = 7.6, 7.6 Hz), 1.40–1.50 (m, 2H), 1.64–1.73 (m, 2H), 3.96–3.99 (m, 1H), 4.30 (d, 1H, *J* = 12.4 Hz), 4.57 (d, 1H, *J* = 12.4 Hz), 6.05 (d, 1H, *J* = 6.9 Hz), 6.58 (dd, 1H, *J* = 6.9, 6.2 Hz), 7.44 (d, 1H, *J* = 1.4 Hz), 7.50 (d, 1H, *J* = 1.4 Hz); <sup>13</sup>C NMR (150 MHz, CDCl<sub>3</sub>): δ 12.0, 12.7, 16.7, 16.9, 17.0, 17.4, 26.6, 29.2, 40.4, 45.2, 67.7, 108.2, 120.1, 126.5, 128.7, 134.2, 135.4, 136.0, 145.1, 156.5; IR (neat): 2943, 2866, 2225, 1462, 1384, 1118, 1057, 991, 964, 883, 783 cm<sup>-1</sup>; HRMS (ESI): calcd. for C<sub>20</sub>H<sub>25</sub>NNaO<sub>3</sub>Si [M+Na]<sup>+</sup>: 346.1598; found: 346.1601.

### Synthesis of cycloadduct **8h**

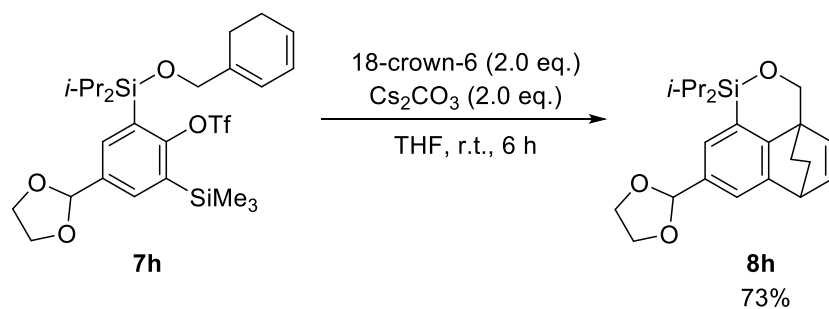

According to the typical procedure, **8h** was prepared from the reaction of 18-crown-6 (41.2 mg, 0.156 mmol), **7h** (46.2 mg, 0.0779 mmol) in THF (1.5 mL) and Cs<sub>2</sub>CO<sub>3</sub> (50.8 mg, 0.156 mmol) at room temperature for 6 h. Purification by column chromatography (EtOAc/hexane = 1/20) afforded cycloadduct **8h** (20.9 mg, 73%) as colorless oil.

**8h**: *R*<sub>f</sub> 0.35 (EtOAc/hexane = 1/10); <sup>1</sup>H NMR (600 MHz, CDCl<sub>3</sub>): δ 0.95 (d, 3H, *J* = 6.9 Hz), 1.00 (d, 3H, *J* = 7.6 Hz), 1.09 (d, 3H, *J* = 7.6 Hz), 1.13 (d, 3H, *J* = 7.6 Hz), 1.18 (qq, 1H, *J* = 7.6, 6.9 Hz), 1.30 (qq, 1H, *J* = 7.6, 7.6 Hz), 1.37 (ddd, 1H, *J* = 12.1, 12.1, 6.9 Hz), 1.46–1.52 (m, 1H), 1.62–1.69 (m, 2H), 3.91–3.94 (m, 1H), 4.01–4.06 (m, 2H), 4.12–4.17 (m, 2H), 4.29 (d, 1H, *J* = 11.7 Hz), 4.58 (d, 1H, *J* = 11.7 Hz), 5.78 (s, 1H), 6.04 (d, 1H, *J* = 7.6 Hz), 6.56 (dd, 1H, *J* = 7.6, 6.2 Hz), 7.27 (d, 1H, *J* = 2.0 Hz), 7.34 (d, 1H, *J* = 2.0

Hz);  $^{13}\text{C}$  NMR (150 MHz,  $\text{CDCl}_3$ ):  $\delta$  12.2, 12.8, 16.8, 17.0, 17.2, 17.6, 26.9, 29.7, 40.8, 44.9, 65.2, 68.2, 104.4, 121.6, 126.5, 128.3, 133.5, 135.7, 136.2, 144.6, 152.8; **IR** (neat): 2947, 2866, 1462, 1369, 1087, 906,  $725\text{ cm}^{-1}$ ; **HRMS** (ESI): calcd. for  $\text{C}_{22}\text{H}_{31}\text{O}_3\text{Si}$   $[\text{M}+\text{H}]^+$ : 371.2037; found: 371.2038.

#### Synthesis of cycloadduct **8i**

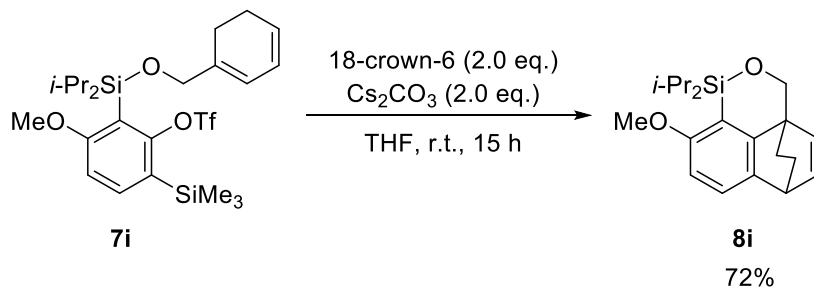

According to the typical procedure, **8i** was prepared from the reaction of 18-crown-6 ether (89.5 mg, 0.339 mmol), **7i** (93.3 mg, 0.169 mmol) in THF (3 mL) and  $\text{Cs}_2\text{CO}_3$  (111 mg, 0.339 mmol) at room temperature for 15 h. Purification by flash column chromatography (silica gel, EtOAc/hexane = 1/50) to afford cycloadduct **8i** (39.8 mg, 72%) as colorless oil.

**8i**:  $R_f$  0.62 (EtOAc/hexane = 1/10);  $^1\text{H}$  NMR (600 MHz,  $\text{CDCl}_3$ ):  $\delta$  0.90 (d, 3H,  $J = 7.6$  Hz), 1.02 (d, 3H,  $J = 7.6$  Hz), 1.06 (d, 3H,  $J = 7.6$  Hz), 1.12 (d, 3H,  $J = 7.6$  Hz), 1.23 (qq, 1H,  $J = 7.6, 7.6$  Hz), 1.30 (qq, 1H,  $J = 7.6, 7.6$  Hz), 1.35 (ddd, 1H,  $J = 11.0, 11.0, 4.1$  Hz), 1.44–1.50 (m, 1H), 1.60–1.70 (m, 2H), 3.73 (s, 3H), 3.84–3.87 (m, 1H), 4.24 (d, 1H,  $J = 11.7$  Hz), 4.51 (d, 1H,  $J = 11.7$  Hz), 6.03 (d, 1H,  $J = 7.6$  Hz), 6.50 (d, 1H,  $J = 8.2$  Hz), 6.57 (dd, 1H,  $J = 7.6, 6.2$  Hz), 7.11 (d, 1H,  $J = 8.2$  Hz);  $^{13}\text{C}$  NMR (150 MHz,  $\text{CDCl}_3$ ):  $\delta$  12.2, 13.2, 17.0, 17.2, 17.6, 18.2, 27.4, 29.6, 39.9, 44.6, 54.7, 68.1, 104.8, 116.4, 124.5, 135.7, 136.8, 137.0, 152.9, 161.5; **IR** (neat): 2943, 2862, 1573, 1454, 1238, 1056, 991, 883,  $771\text{ cm}^{-1}$ ; **HRMS** (ESI): Calcd. for  $\text{C}_{20}\text{H}_{29}\text{O}_2\text{Si}$   $[\text{M}+\text{H}]^+$ : 329.1931; found: 329.1922.

#### Synthesis of cycloadduct **8j**

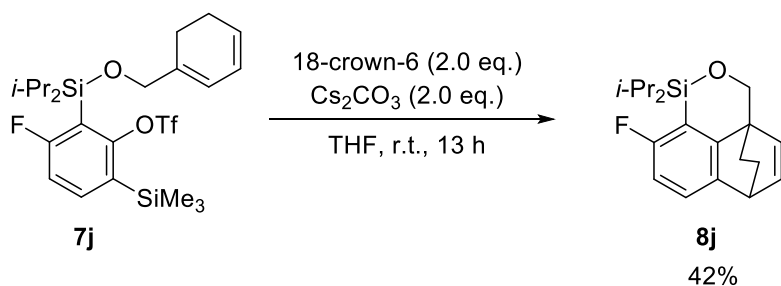

According to the typical procedure, **8j** was prepared from the reaction of 18-crown-6 (104 mg, 0.395 mmol), **7j** (106 mg, 0.197 mmol) in THF (3.5 mL) and  $\text{Cs}_2\text{CO}_3$  (129 mg, 0.395 mmol) at room temperature for 13 h. Purification by flash column chromatography (silica gel, EtOAc/hexane = 1/50) afford cycloadduct **8j** (26.2 mg, 42%) as colorless oil.

**8j**:  $R_f$  0.47 (EtOAc/hexane = 1/10);  $^1\text{H}$  NMR (600 MHz,  $\text{CDCl}_3$ ):  $\delta$  0.93 (d, 3H,  $J = 7.6$  Hz), 1.05 (d, 3H,  $J$

= 7.6 Hz), 1.09 (d, 3H,  $J = 7.6$  Hz), 1.14 (d, 3H,  $J = 7.6$  Hz), 1.26 (qq, 1H,  $J = 7.6, 7.6$  Hz), 1.31–1.39 (m, 2H) 1.44–1.49 (m, 1H), 1.61–1.69 (m, 2H), 3.90–3.93 (m, 1H), 4.27 (d, 1H,  $J = 11.7$  Hz), 4.55 (d, 1H,  $J = 11.7$  Hz), 6.04 (d, 1H,  $J = 8.2$  Hz), 6.58 (dd, 1H,  $J = 8.2, 6.8$  Hz), 6.71 (dd, 1H,  $J_{\text{HF}} = 8.2, J = 8.2$  Hz), 7.13 (dd, 1H,  $J = 8.2, J_{\text{HF}} = 6.2$  Hz);  $^{13}\text{C NMR}$  (150 MHz,  $\text{CDCl}_3$ ):  $\delta$  12.1, 13.0, 16.8, 16.9, 17.1, 17.6, 27.1, 29.5, 40.1, 44.8, 67.9, 110.2 (d,  $J_{\text{CF}} = 26$  Hz), 114.3 (d,  $J_{\text{CF}} = 38$  Hz), 125.3 (d,  $J_{\text{CF}} = 8.7$  Hz), 135.6, 136.6, 140.3, 152.8 (d,  $J_{\text{CF}} = 13$  Hz), 164.4 (d,  $J_{\text{CF}} = 236$  Hz); **IR** (neat): 2951, 2866, 1782, 1570, 1442, 1276, 1060, 964, 883, 736  $\text{cm}^{-1}$ ; **HRMS** (ESI): calcd. for  $\text{C}_{19}\text{H}_{26}\text{FOSi}$   $[\text{M}+\text{H}]^+$ : 317.1731; found: 317.1728.

#### Synthesis of cycloadduct **8k**

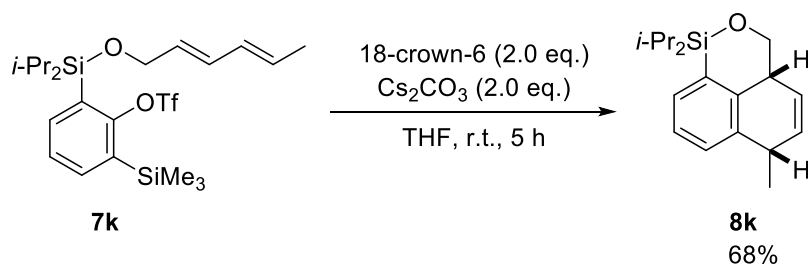

According to the typical procedure, **8k** was prepared from the reaction of 18-crown-6 (121 mg, 0.458 mmol), **7k** (117 mg, 0.229 mmol) in THF (4 mL) and  $\text{Cs}_2\text{CO}_3$  (149 mg, 0.458 mmol) at room temperature for 5 h. Purification by column chromatography (EtOAc/hexane = 1/50) afforded cycloadduct **8k** (44.6 mg, 68%) as colorless oil.

**8k**:  $R_f$  0.31 (EtOAc/hexane = 1/20); Spectral data matched those reported in the literature.<sup>8</sup>

#### Synthesis of cycloadduct **8l**

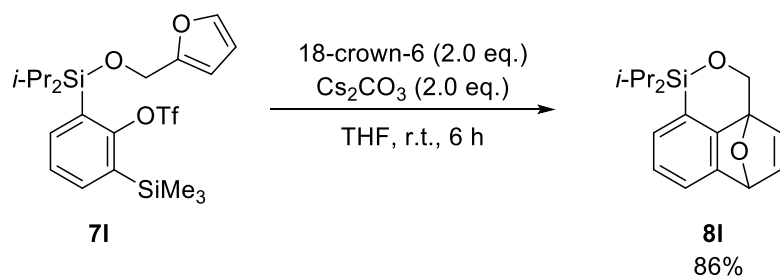

According to the typical procedure, **8l** was prepared from the reaction of 18-crown-6 (210 mg, 0.795 mmol), **7l** (202 mg, 0.397 mmol) in THF (7 mL) and  $\text{Cs}_2\text{CO}_3$  (259 mg, 0.795 mmol) at room temperature for 6 h. Purification by flash column chromatography (EtOAc/hexane = 1/30) afforded cycloadduct **8l** (97.7 mg, 86%) as colorless oil.

**12a**:  $R_f$  0.33 (EtOAc/hexane = 1/10); Spectral data matched those reported in the literature.<sup>8</sup>

### Synthesis of cycloadduct **8m**

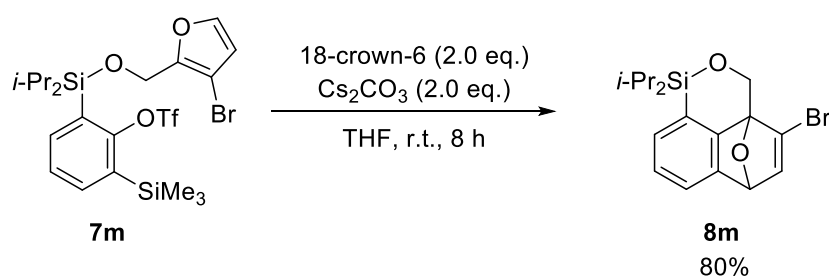

According to the typical procedure, **8m** was prepared from the reaction of 18-crown-6 (167 mg, 0.632 mmol), **7m** (186 mg, 0.316 mmol) in THF (5 mL) and  $\text{Cs}_2\text{CO}_3$  (206 mg, 0.632 mmol) at room temperature for 8 h. Purification by flash column chromatography (EtOAc/hexane = 1/30) afforded cycloadduct **8m** (92.0 mg, 80%) as colorless oil.

**8m**:  $R_f$  0.30 (EtOAc/hexane = 1/10);  $^1\text{H NMR}$  (600 MHz,  $\text{CDCl}_3$ ):  $\delta$  1.03–1.12 (m, 12H), 1.19–1.26 (m, 2H), 4.35 (d, 1H,  $J = 10.3$  Hz), 4.70 (d, 1H,  $J = 10.3$  Hz), 5.67 (d, 1H,  $J = 2.1$  Hz), 7.01 (brs, 1H), 7.03 (dd, 1H,  $J = 7.6, 6.8$  Hz), 7.11 (d, 1H,  $J = 7.6$  Hz), 7.29 (d, 1H,  $J = 6.8$  Hz);  $^{13}\text{C NMR}$  (150 MHz,  $\text{CDCl}_3$ ):  $\delta$  16.88, 16.98, 17.02, 17.4, 62.9, 83.3, 88.1, 121.4, 125.3, 126.4, 128.8, 138.7, 141.0, 146.5, 155.4; **IR** (neat): 2943, 2862, 1570, 1462, 1083, 1006, 968, 883, 756  $\text{cm}^{-1}$ ; **HRMS** (ESI): calcd. for  $\text{C}_{17}\text{H}_{22}\text{BrO}_2\text{Si}$   $[\text{M}+\text{H}]^+$ : 365.0567; found: 365.0583.

### Synthesis of cycloadduct **8n**

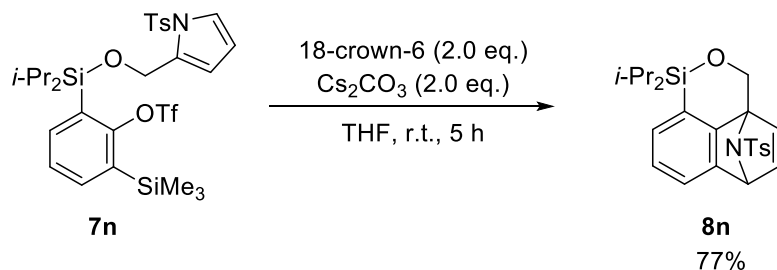

According to the typical procedure, **8n** was prepared from the reaction of 18-crown-6 (272 mg, 1.030 mmol), **7n** (341 mg, 0.515 mmol) in THF (9 mL) and  $\text{Cs}_2\text{CO}_3$  (336 mg, 1.030 mmol) at room temperature for 5 h. Purification by flash column chromatography (EtOAc/hexane = 1/5) afforded cycloadduct **8n** (174 mg, 77%) as a white solid.

**8n**:  $R_f$  0.50 (EtOAc/hexane = 1/3); Spectral data matched those reported in the literature.<sup>8</sup>



### Synthesis of cycloadduct **8o**

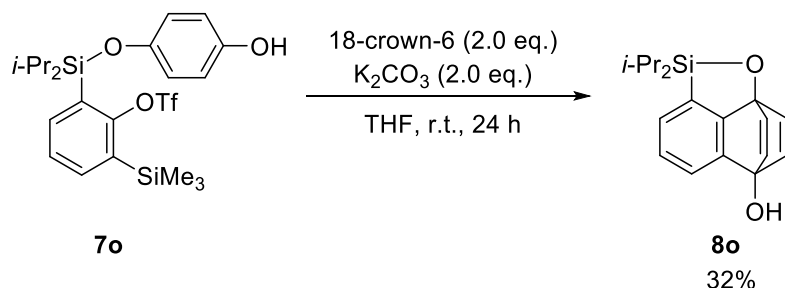

According to the typical procedure, **8o** was prepared from the reaction of 18-crown-6 (102 mg, 0.387 mmol), **7o** (101 mg, 0.193 mmol) in THF (3.5 mL) and  $\text{K}_2\text{CO}_3$  (53.5 mg, 0.387 mmol) at room temperature for 24 h. Purification by column chromatography (EtOAc/hexane = 1/5) afforded cycloadduct **8o** (18.4 mg, 32%) as colorless oil along with starting material **7o** (15.9 mg, 16%).

**8o**:  $R_f$  0.26 (EtOAc/hexane = 1/3); Spectral data matched those reported in the literature.<sup>9</sup>

### Synthesis of cycloadduct **8p**

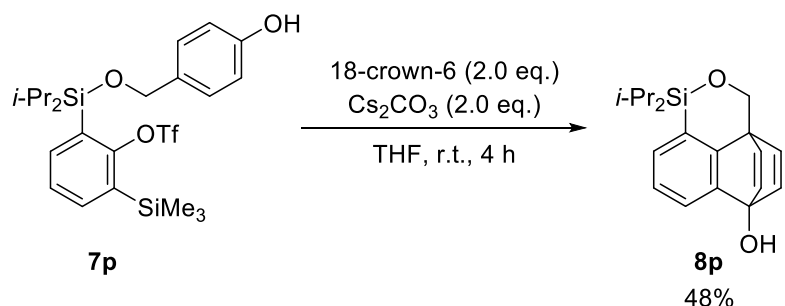

According to the typical procedure, **8p** was prepared from the reaction of 18-crown-6 (106 mg, 0.401 mmol), **7p** (107 mg, 0.200 mmol) in THF (3.5 mL) and  $\text{Cs}_2\text{CO}_3$  (131 mg, 0.401 mmol) at room temperature for 4 h. Purification by column chromatography (EtOAc/hexane = 1/5) afforded cycloadduct **8p** (30.2 mg, 48%) as colorless oil.

**8p**:  $R_f$  0.31 (EtOAc/hexane = 1/3); Spectral data matched those reported in the literature.<sup>9</sup>

### Synthesis of dihydrophenanthrene **10**

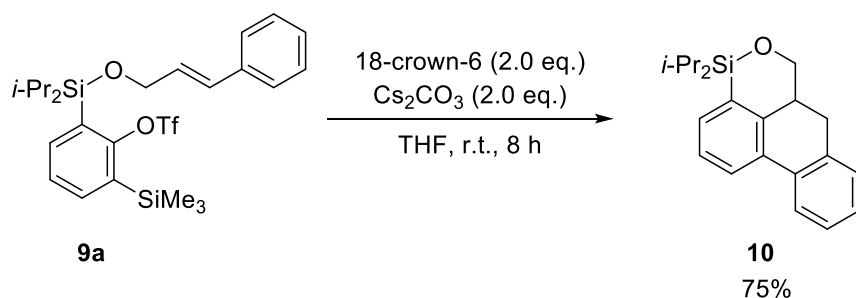

According to the typical procedure, **10** was prepared from the reaction of 18-crown-6 (93.5 mg, 0.354 mmol), **9a** (96.4 mg, 0.177 mmol) in THF (3 mL) and  $\text{Cs}_2\text{CO}_3$  (115 mg, 0.354 mmol) at room temperature for 8 h.

Purification by column chromatography (EtOAc/hexane = 1/50) afforded dihydrophenanthrene **10** (43.0 mg, 75%) as a white solid.

**10**: mp: 80–83 °C;  $R_f$  0.43 (EtOAc/hexane = 1/20);  $^1\text{H NMR}$  (500 MHz,  $\text{CDCl}_3$ ):  $\delta$  0.89 (d, 3H,  $J = 7.5$  Hz), 0.92 (d, 3H,  $J = 7.0$  Hz), 1.11 (qq, 1H,  $J = 7.5, 7.0$  Hz), 1.16 (d, 3H,  $J = 7.5$  Hz), 1.20 (d, 3H,  $J = 7.5$  Hz), 1.34 (qq, 1H,  $J = 7.5, 7.5$  Hz), 2.48 (dd, 1H,  $J = 14.9, 14.6$  Hz), 2.65 (dd, 1H,  $J = 14.6, 4.9$  Hz), 3.18 (dddd, 1H,  $J = 14.9, 10.9, 4.9, 4.6$  Hz), 3.93 (dd, 1H,  $J = 10.9, 10.9$  Hz), 4.24 (dd, 1H,  $J = 10.9, 4.6$  Hz), 7.21–7.25 (m, 2H), 7.31–7.40 (m, 3H), 7.72 (d, 1H,  $J = 7.8$  Hz), 7.83 (dd, 1H,  $J = 7.8, 1.4$  Hz);  $^{13}\text{C NMR}$  (125 MHz,  $\text{CDCl}_3$ ):  $\delta$  12.8, 13.3, 16.8, 17.1, 18.1, 31.2, 37.4, 68.5, 123.9, 125.0, 126.3, 127.1, 127.4, 127.8, 130.3, 132.8, 133.4, 134.4, 135.5, 146.2; **IR** (neat): 2943, 2862, 1462, 1099, 1080, 995, 910, 883, 736  $\text{cm}^{-1}$ ; **HRMS** (ESI): calcd. for  $\text{C}_{21}\text{H}_{27}\text{OSi}$   $[\text{M}+\text{H}]^+$ : 323.1826; found: 323.1831.

Reaction with *o*-bromoaryl tosylate **9b**

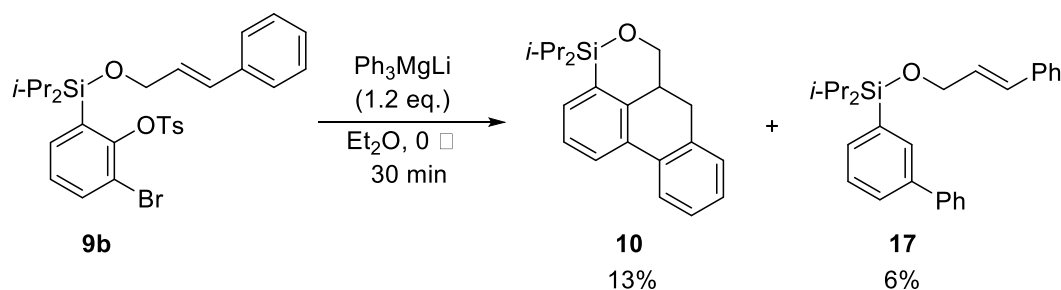

To a solution of PhLi (1.76 M in Bu<sub>2</sub>O, 424  $\mu\text{L}$ , 0.746 mmol) in Et<sub>2</sub>O (3 mL) was added PhMgBr (2.93 M in Et<sub>2</sub>O, 138  $\mu\text{L}$ , 0.404 mmol) at 0 °C, and the mixture was stirred for 30 min at this temperature. The resulting solution of Ph<sub>3</sub>MgLi was used in the following experiment.

To a solution of bromoaryl tosylate **9b** (178 mg, 0.311 mmol) in Et<sub>2</sub>O (6 mL) was added dropwise Ph<sub>3</sub>MgLi (*vide supra*) at 0 °C. After stirring for 30 min at this temperature, the reaction was quenched by adding saturated aqueous NH<sub>4</sub>Cl, and the mixture was extracted with EtOAc (x3). The combined organic layer was washed with brine, dried (Na<sub>2</sub>SO<sub>4</sub>), and concentrated in vacuo. The residue was purified by flash column chromatography (EtOAc/hexane = 1/30 to 1/10) followed by PTLC (CHCl<sub>3</sub>/hexane = 1/3 x2) to afford dihydrophenanthrene **10** (13.1 mg, 13%) and biaryl **17** (7.8 mg, 6%, colorless oil) along with **9b** (84.3 mg, 47%).

**17**:  $R_f$  0.52 (CHCl<sub>3</sub>/hexane = 1/2);  $^1\text{H NMR}$  (600 MHz,  $\text{CDCl}_3$ ):  $\delta$  1.08 (d, 6H,  $J = 7.6$  Hz), 1.13 (d, 6H,  $J = 7.6$  Hz), 1.38 (qq, 2H,  $J = 7.6, 7.6$  Hz), 4.52 (dd, 2H,  $J = 4.8, 1.4$  Hz), 6.36 (td, 1H,  $J = 15.8, 4.8$  Hz), 6.72 (brd, 1H,  $J = 15.8$  Hz), 7.23 (d, 1H,  $J = 6.8$  Hz), 7.29–7.34 (m, 3H), 7.36–7.42 (m, 4H), 7.45 (dd, 1H,  $J = 7.6, 6.8$  Hz), 7.54–7.60 (m, 3H), 7.62 (d, 1H,  $J = 7.6$  Hz), 7.82 (s, 1H);  $^{13}\text{C NMR}$  (150 MHz,  $\text{CDCl}_3$ ):  $\delta$  11.7, 17.0, 17.2, 64.4, 126.7, 127.4, 127.5, 127.6, 128.4, 128.5, 128.8, 129.0, 129.2, 129.8, 133.7, 134.0, 135.0, 137.4, 140.6, 141.8; **IR** (neat): 2943, 2866, 1462, 1384, 1122, 906, 733  $\text{cm}^{-1}$ ; **HRMS** (ESI): calcd. for  $\text{C}_{27}\text{H}_{32}\text{NaOSi}$   $[\text{M}+\text{Na}]^+$ : 423.2115; found: 423.2125.

## Synthesis of phenanthrene **12**

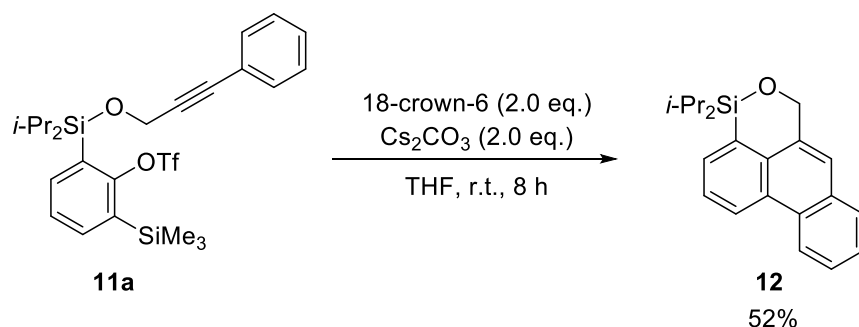

According to the typical procedure, **12** was prepared from the reaction of 18-crown-6 (91.5 mg, 0.346 mmol), **11a** (93.8 mg, 0.173 mmol) in THF (3 mL) and  $\text{Cs}_2\text{CO}_3$  (113 mg, 0.346 mmol) at room temperature for 8 h. Purification by column chromatography (EtOAc/hexane = 1/10) afforded phenanthrene **12** (28.8 mg, 52%) as a white solid.

**12**: mp: 48–51 °C;  $R_f$  0.53 (EtOAc/hexane = 1/10);  $^1\text{H NMR}$  (500 MHz,  $\text{CDCl}_3$ ):  $\delta$  1.06 (d, 6H,  $J = 7.4$  Hz), 1.08 (d, 6H,  $J = 7.5$  Hz), 1.34 (qq, 2H,  $J = 7.5, 7.4$  Hz), 5.32 (s, 2H), 7.53 (s, 1H), 7.59 (ddd, 1H  $J = 7.8, 7.8, 1.5$  Hz), 7.64 (ddd, 1H,  $J = 7.8, 7.2, 1.5$  Hz), 7.69 (dd, 1H  $J = 8.6, 8.0$  Hz), 7.74 (dd, 1H,  $J = 7.2, 1.5$  Hz), 7.84 (dd, 1H,  $J = 7.8, 1.5$  Hz), 8.68 (brd, 1H,  $J = 8.0$  Hz), 8.80 (dd, 1H  $J = 8.6, 1.5$  Hz);  $^{13}\text{C NMR}$  (125 MHz,  $\text{CDCl}_3$ ):  $\delta$  13.3, 17.2, 17.7, 67.6, 122.5, 123.3, 124.4, 125.7, 126.4, 126.8, 128.3, 129.97, 130.00, 130.4, 131.2, 132.1, 133.9, 135.5; IR (neat): 2943, 2866, 1462, 1408, 1103, 1045, 906, 732  $\text{cm}^{-1}$ ; HRMS (ESI): calcd. for  $\text{C}_{21}\text{H}_{25}\text{OSi}$   $[\text{M}+\text{H}]^+$ : 321.1669; found: 321.1670.

## Reaction with *o*-bromoaryl tosylate **11b**

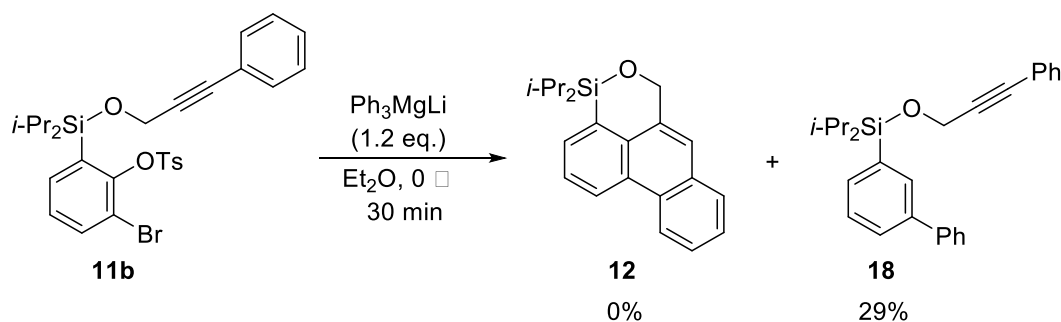

To a solution of PhLi (1.76 M in  $\text{Bu}_2\text{O}$ , 349  $\mu\text{L}$ , 0.614 mmol) in  $\text{Et}_2\text{O}$  (2 mL) was added PhMgBr (2.93 M in  $\text{Et}_2\text{O}$ , 114  $\mu\text{L}$ , 0.333 mmol) at 0 °C, and the mixture was stirred for 30 min at this temperature. The resulting solution of  $\text{Ph}_3\text{MgLi}$  was used in the following experiment.

To a solution of bromoaryl tosylate **11b** (146 mg, 0.256 mmol) in  $\text{Et}_2\text{O}$  (5 mL) was added dropwise  $\text{Ph}_3\text{MgLi}$  (*vide supra*) at 0 °C. After stirring for 30 min at this temperature, the reaction was quenched by adding saturated aqueous  $\text{NH}_4\text{Cl}$ , and the mixture was extracted with EtOAc (x3). The combined organic layer was washed with brine, dried ( $\text{Na}_2\text{SO}_4$ ), and concentrated in vacuo. The residue was purified by flash column chromatography (EtOAc/hexane = 1/20) to afford biaryl **18** (29.1 mg, 29%) as colorless oil along with **11b**

(91.8 mg, 63%)

**18:**  $R_f$  0.45 (EtOAc/hexane = 1/5);  $^1\text{H NMR}$  (600 MHz,  $\text{CDCl}_3$ ):  $\delta$  1.09 (d, 6H,  $J$  = 6.9 Hz), 1.15 (d, 6H,  $J$  = 7.6 Hz), 1.40 (qq, 2H,  $J$  = 7.6, 6.9 Hz), 4.69 (s, 2H), 7.27–7.34 (m, 4H), 7.37–7.40 (m, 4H), 7.46 (dd, 1H  $J$  = 7.6, 7.6 Hz), 7.57–7.64 (m, 4H), 7.86 (s, 1H);  $^{13}\text{C NMR}$  (150 MHz,  $\text{CDCl}_3$ ):  $\delta$  11.7, 16.9, 17.0, 52.9, 85.1, 87.7, 123.2, 127.5, 127.6, 128.4, 128.5, 128.7, 129.0, 132.0, 133.8, 134.0, 134.5, 140.8, 141.8 (several signals overlapped); **IR** (neat): 2943, 2862, 1462, 1369, 1083, 756  $\text{cm}^{-1}$ ; **HRMS** (ESI): calcd. for  $\text{C}_{27}\text{H}_{30}\text{KOSi}$   $[\text{M}+\text{K}]^+$ : 437.1698; found: 437.1705.

### 2-3. Pd-catalyzed (2+2+2) cycloaddition

Optimization study for (2+2+2) cycloaddition of **14**

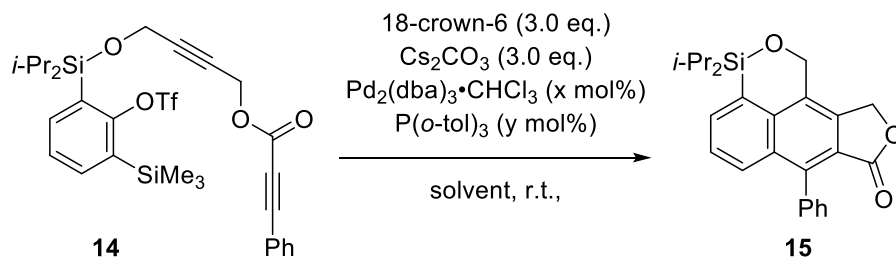

| entry | x              | y  | solvent | concentration | yield <sup>a</sup> |
|-------|----------------|----|---------|---------------|--------------------|
| 1     | 5 <sup>b</sup> | 40 | THF     | 0.025 M       | 28%                |
| 2     | 5 <sup>b</sup> | 40 | MeCN    | 0.025 M       | 15%                |
| 3     | 5              | 40 | THF     | 0.025 M       | 38%                |
| 4     | 10             | 80 | THF     | 0.025 M       | 46%                |
| 5     | 10             | 80 | THF     | 0.125 M       | 24%                |
| 6     | 10             | 80 | THF     | 0.01 M        | 44%                |

<sup>a</sup> isolated yield, <sup>b</sup> Pd<sub>2</sub>(dba)<sub>3</sub> instead of Pd<sub>2</sub>(dba)<sub>3</sub>·CHCl<sub>3</sub>

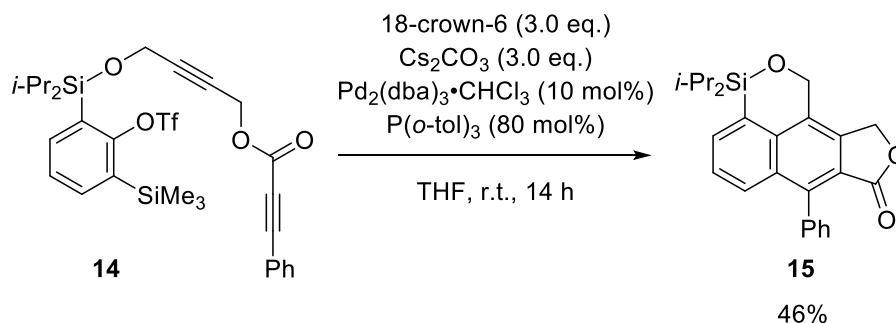

Pd<sub>2</sub>(dba)<sub>3</sub>·CHCl<sub>3</sub> (19.5 mg, 0.0188 mmol) and P(*o*-tol)<sub>3</sub> (45.8 mg, 0.150 mmol) were dissolved in THF (1.5 mL), and the mixture was stirred at room temperature for 15 min. The catalyst solution was added through a cannula to a solution of 18-crown-6 (149 mg, 0.563 mmol), Cs<sub>2</sub>CO<sub>3</sub> (183 mg, 0.563 mmol), and **14** (117 mg, 0.188 mmol) in THF (4 mL) at room temperature. More THF (1.5 mL) was used to wash the catalyst through. After stirring for 14 h at room temperature, the reaction was quenched by adding saturated aqueous NH<sub>4</sub>Cl, and the mixture was extracted with EtOAc (x3). The combined organic layer was washed with brine, dried (Na<sub>2</sub>SO<sub>4</sub>), and concentrated in vacuo. The residue was purified by flash column chromatography (silica gel, EtOAc/hexane = 1/5) to afford naphthalene **15** (35.0 mg, 46%) as pale yellow oil.

**15**: *R*<sub>f</sub> 0.38 (EtOAc/hexane = 1/3); <sup>1</sup>H NMR (600 MHz, CDCl<sub>3</sub>): δ 1.07 (d, 6H, *J* = 7.6 Hz), 1.11 (d, 6H, *J* = 6.8 Hz), 1.36 (qq, 2H, *J* = 7.6, 6.8 Hz), 5.36 (s, 2H), 5.37 (s, 2H), 7.36–7.40 (m, 2H), 7.49–7.56 (m, 4H), 7.76 (dd, 1H, *J* = 6.2, 1.4 Hz), 7.89 (dd, 1H, *J* = 8.2, 1.4 Hz); <sup>13</sup>C NMR (150 MHz, CDCl<sub>3</sub>): δ 12.8, 16.7,

17.2, 63.1, 67.1, 119.2, 125.9, 128.3, 128.5, 129.1, 129.4, 130.41, 130.43, 133.0, 134.3, 134.8, 135.7, 138.2, 141.7, 170.2; **IR** (neat): 2966, 1716, 1396, 1219, 1138, 910, 871, 844, 733  $\text{cm}^{-1}$ ; **HRMS** (ESI): calcd. for  $\text{C}_{25}\text{H}_{27}\text{O}_3\text{Si}$   $[\text{M}+\text{H}]^+$ : 403.1724; found: 403.1733.

#### Protodesilylation of **15**

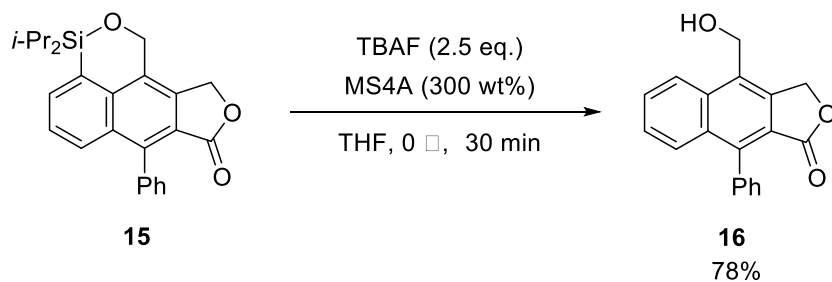

To a solution of **15** (22.3 mg, 0.0554 mmol) and MS4A (66.9 mg) in THF (2 mL) was added tetrabutylammonium fluoride (TBAF, 1.0 M in THF, 138  $\mu\text{L}$ , 0.138 mmol). After stirring for 30 min at 0  $^{\circ}\text{C}$ , the reaction was quenched by adding saturated aqueous  $\text{NH}_4\text{Cl}$ . The resulting suspension was filtered through a Celite<sup>®</sup> pad (washed with EtOAc) and extracted with EtOAc (x3). The combined organic layer was washed with brine, dried ( $\text{Na}_2\text{SO}_4$ ), and concentrated in vacuo. The residue was purified by flash column chromatography (silica gel, EtOAc/hexane = 1/1) to afford alcohol **16** (12.5 mg, 78%) as a white solid.

**16**: mp: 150–155  $^{\circ}\text{C}$ ;  $R_f$  0.42 (EtOAc/hexane = 2/1);  **$^1\text{H}$  NMR** (600 MHz,  $\text{CDCl}_3$ ):  $\delta$  2.26 (brs, 1H), 5.30 (s, 2H), 5.60 (s, 2H), 7.26–7.32 (m, 2H), 7.47–7.52 (m, 4H), 7.69 (t, 1H,  $J = 7.6$  Hz), 7.80 (brd, 1H,  $J = 8.9$  Hz), 8.16 (brd, 1H,  $J = 8.2$  Hz);  **$^{13}\text{C}$  NMR** (150 MHz,  $\text{CDCl}_3$ ):  $\delta$  60.0, 68.6, 119.9, 123.7, 126.8, 128.3, 128.5, 129.2, 129.3, 129.4, 130.2, 133.4, 134.0, 134.8, 138.9, 142.5, 170.5; **IR** (neat): 3394, 1747, 1620, 1442, 1342, 1207, 1122, 1060, 1022, 910, 767, 732  $\text{cm}^{-1}$ ; **HRMS** (ESI): calcd. for  $\text{C}_{19}\text{H}_{14}\text{NaO}_3$   $[\text{M}+\text{H}]^+$ : 313.0835; found: 313.0841.

### 3. References

1. J. E. M. Booker, A. Boto, G. H. Churchill, C. P. Green, M. Ling, G. Meek, J. Prabhakaran, D. Sinclair, A. J. Blake, G. Pattenden, *Org. Biomol. Chem.*, 2006, **4**, 4193–4205.
2. (a) J. A. Tallarico, K. M. Depew, H. E. Pelish, N. J. Westwood, C. W. Lindsley, M. D. Shair, S. L. Schreiber and M. A. Foley, *J. Comb. Chem.*, 2001, **3**, 312–318; (b) S. Varaprath and D. H. Stutts, *J. Organomet. Chem.*, 2007, **692**, 1892–1897; (c) Huang and V. Gevorgyan, *J. Am. Chem. Soc.*, 2009, **131**, 10844–10845; (d) S. Lee, H. Lee and K. L. Tan, *J. Am. Chem. Soc.*, 2013, **135**, 18778–18781; (e) N. Hayakawa, T. Morimoto, A. Takagi, T. Tanikawa, D. Hashizume and T. Matsuo, *Chem. Lett.*, 2016, **45**, 409–411.
3. M. E. Jung, C. A. Roberts, F. Perez, H. V. Pham, L. Zou, K. N. Houk, *Org. Lett.*, 2016, **18**, 32–35.
4. T. Ikawa, T. Nishiyama, T. Shigeta, S. Mohri, S. Morita, S. Takayanagi, Y. Terauchi, Y. Morikawa, A. Takagi, Y. Ishikawa, S. Fujii, Y. Kita, S. Akai, *Angew. Chem. Int. Ed.*, 2011, **50**, 5674–5677.
5. J. J. Gajewski, J. Jurayj, D. R. Kimbrough, M. E. Gande, B. Ganem, B. K. Carpenter, *J. Am. Chem. Soc.*, 1987, **109**, 1170–1186.
6. K.-F. Chan, H. N. C. Wong, *Org. Lett.*, 2001, **3**, 3991–3994.
7. A. S. K. Hashmi, M. Rudolph, J. Huck, W. Frey, J. W. Bats, M. Hamzić, *Angew. Chem. Int. Ed.*, 2009, **48**, 5848–5852.
8. A. Nishii, H. Takikawa, K. Suzuki, *Chem. Sci.*, 2019, **10**, 3840–3845.
9. H. Takikawa, A. Nishii, H. Takiguchi, H. Yagishita, M. Tanaka, K. Hirano, M. Uchiyama, K. Ohmori and K. Suzuki, *Angew. Chem. Int. Ed.*, 2020, **59**, 12440–12444.

|                        |         |                        |                      |              |                                       |                 |                  |         |              |
|------------------------|---------|------------------------|----------------------|--------------|---------------------------------------|-----------------|------------------|---------|--------------|
| Acquisition Time (sec) | 3.4919  | Date                   | 19 Jun 2020 15:32:16 | File Name    | F:\NMR CE t H \tawatari\TT0357-1H.als | Frequency (MHz) | 500.00           | Nucleus | 1H           |
| Number of Transients   | 8       | Original Points Count  | 26214                | Points Count | 26214                                 | Pulse Sequence  | single_pulse.ex2 | Solvent | CHLOROFORM-D |
| Sweep Width (Hz)       | 7507.11 | Temperature (degree C) | 22.200               |              |                                       |                 |                  |         |              |

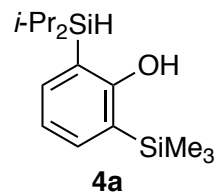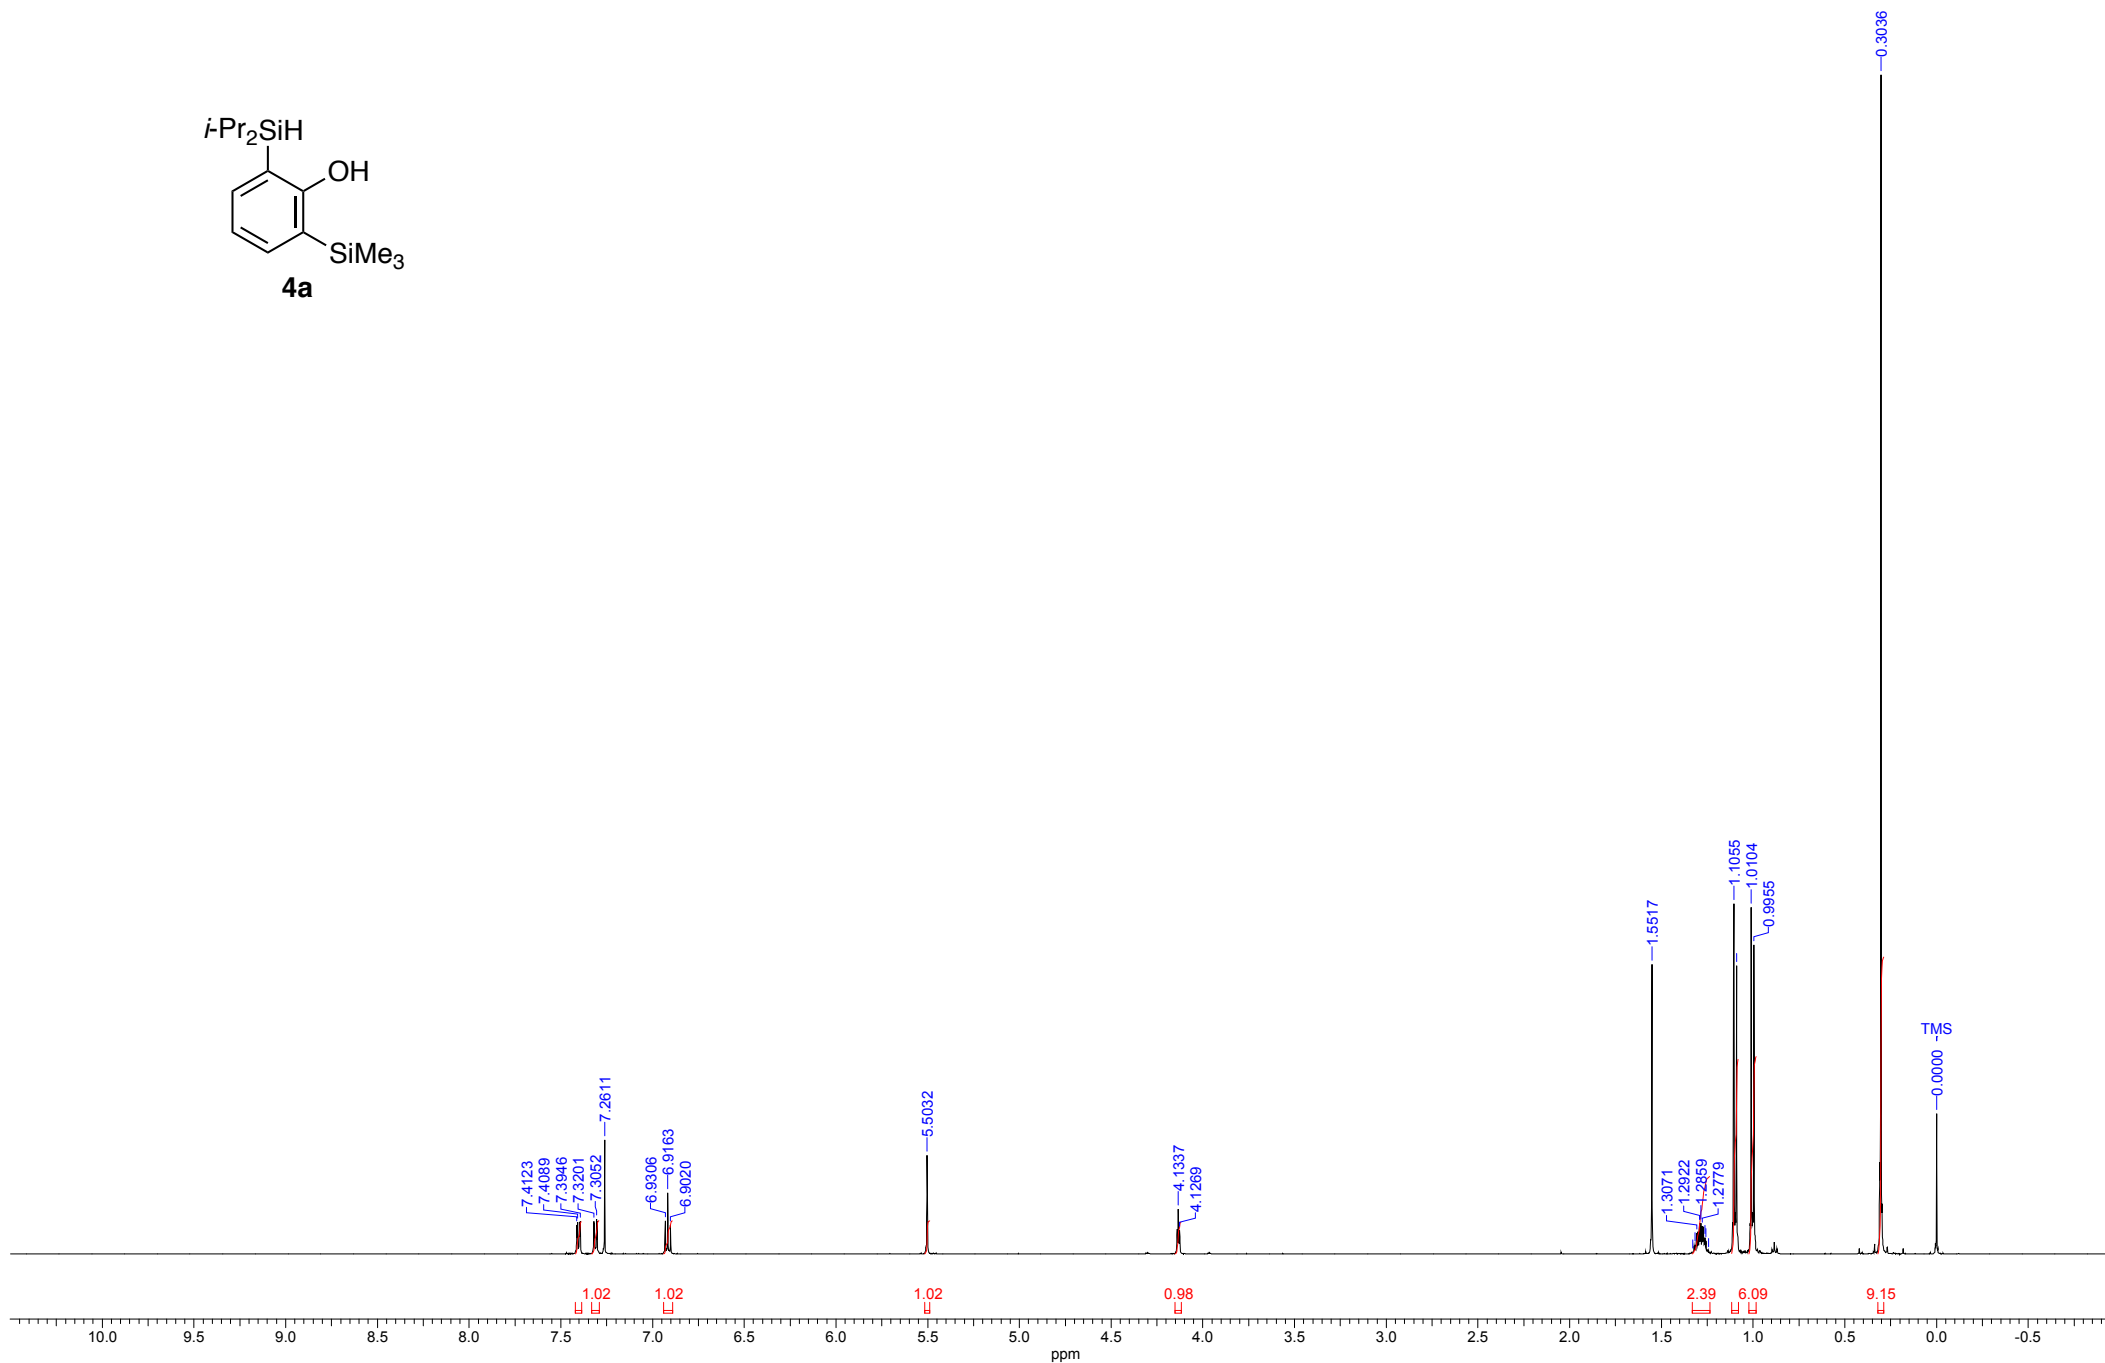



|                        |          |                        |                      |              |                                        |                 |                  |         |              |
|------------------------|----------|------------------------|----------------------|--------------|----------------------------------------|-----------------|------------------|---------|--------------|
| Acquisition Time (sec) | 0.8336   | Date                   | 19 Jun 2020 15:32:58 | File Name    | F:\NMR_CE t H \tawarani\TT0357-13C.als | Frequency (MHz) | 125.00           | Nucleus | 13C          |
| Number of Transients   | 256      | Original Points Count  | 26214                | Points Count | 26214                                  | Pulse Sequence  | single_pulse_dec | Solvent | CHLOROFORM-D |
| Sweep Width (Hz)       | 31444.86 | Temperature (degree C) | 22.700               |              |                                        |                 |                  |         |              |

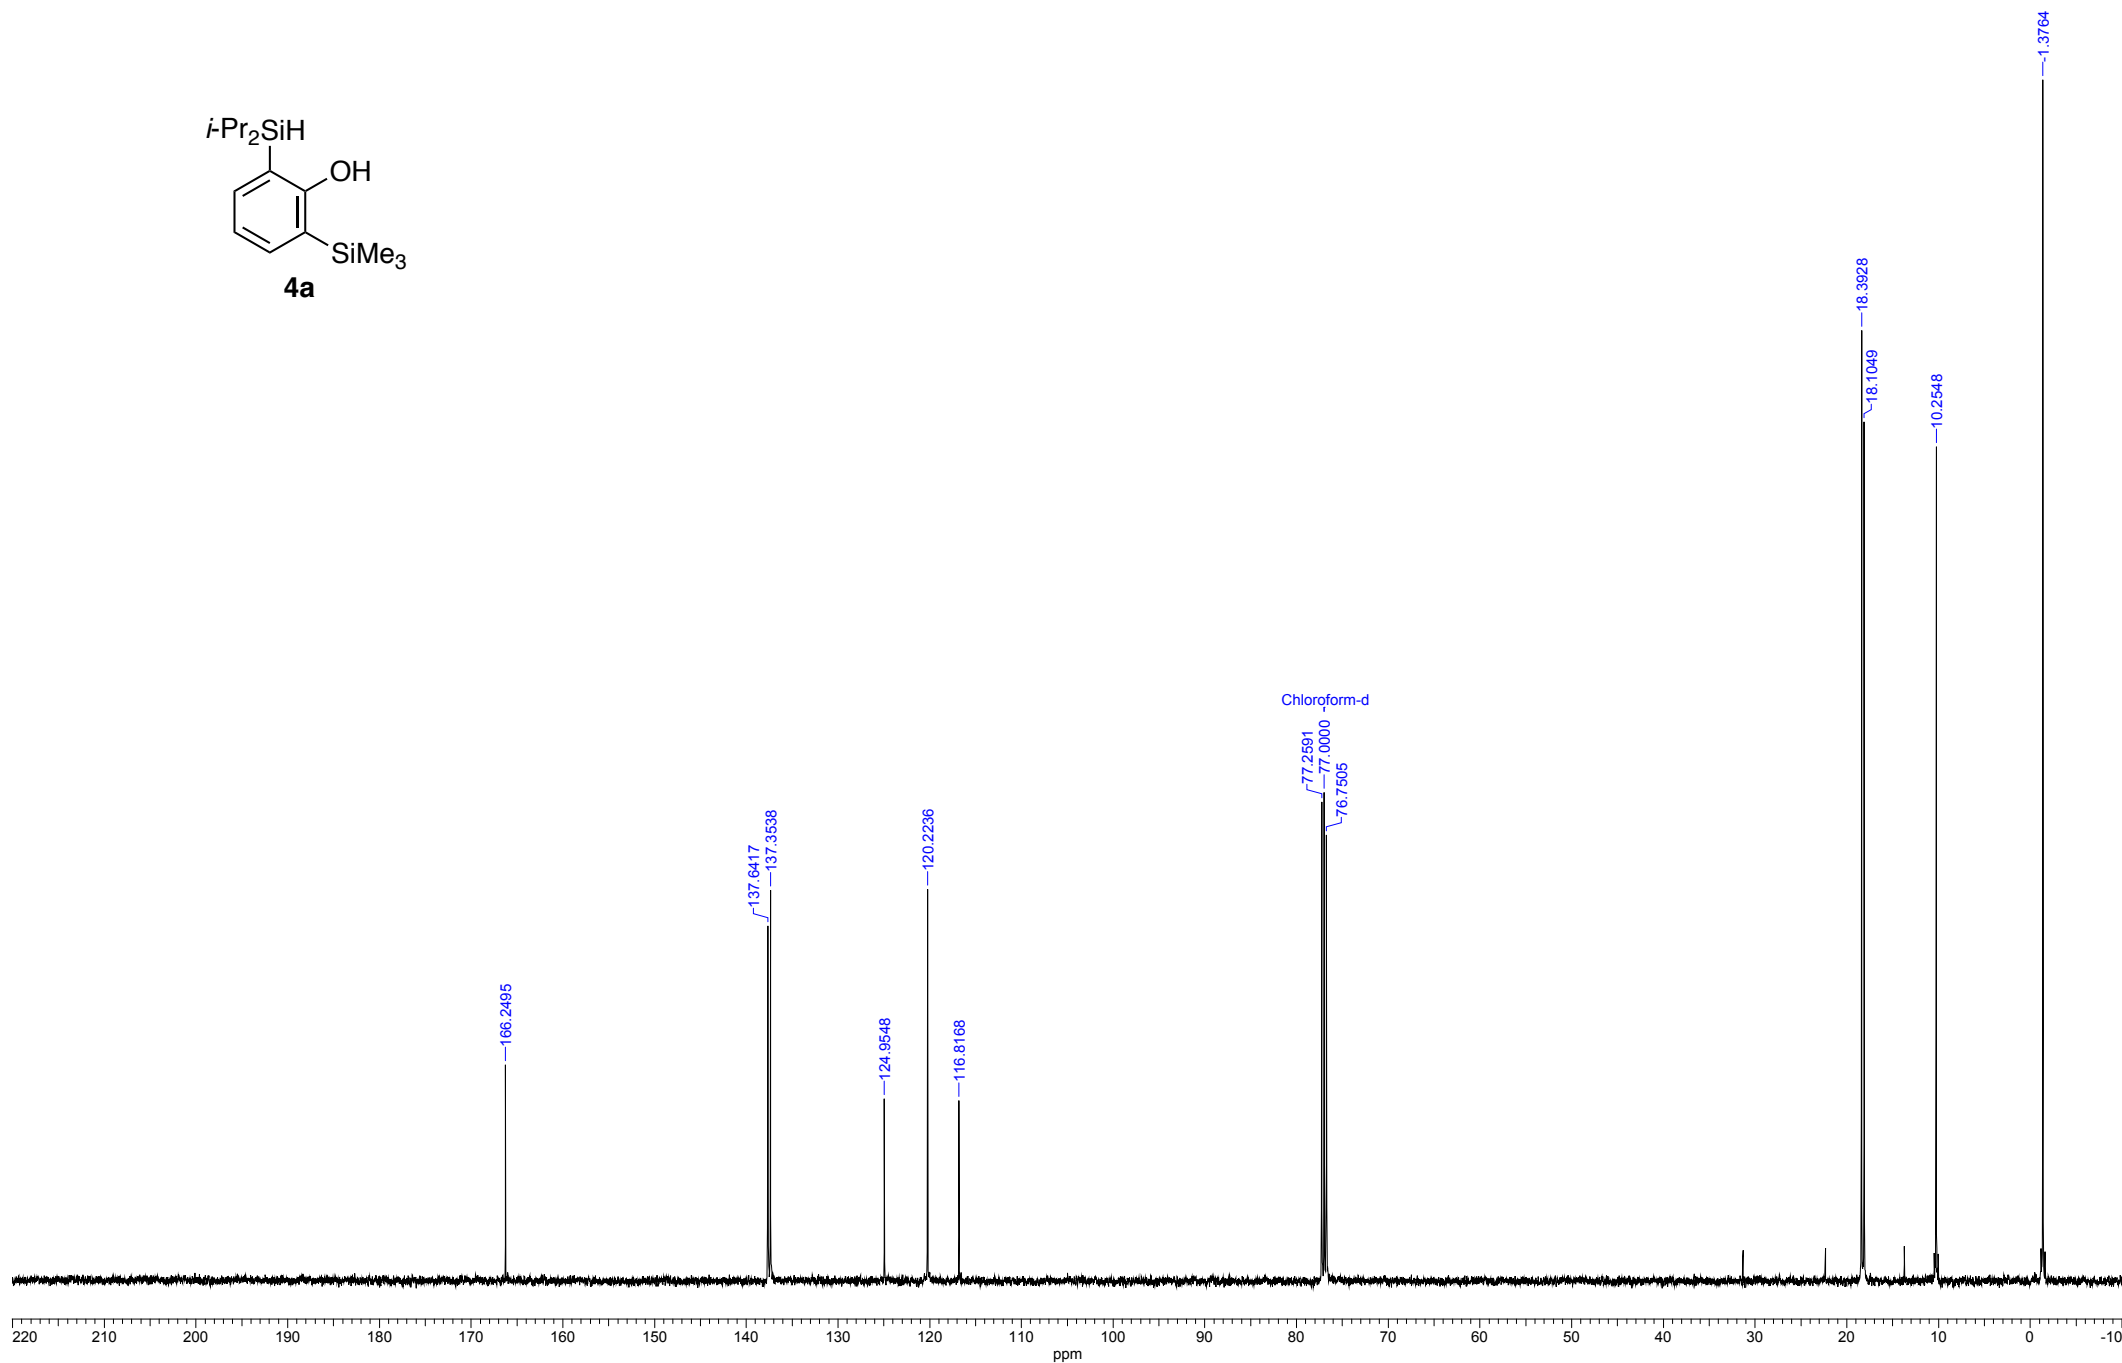

|                        |         |                        |                      |              |                                            |                 |                  |         |              |
|------------------------|---------|------------------------|----------------------|--------------|--------------------------------------------|-----------------|------------------|---------|--------------|
| Acquisition Time (sec) | 3.4919  | Date                   | 20 Jun 2020 18:35:38 | File Name    | F:\NMR CE t H \tawatari\TT0471\column2.als | Frequency (MHz) | 500.00           | Nucleus | 1H           |
| Number of Transients   | 8       | Original Points Count  | 26214                | Points Count | 26214                                      | Pulse Sequence  | single_pulse.ex2 | Solvent | CHLOROFORM-D |
| Sweep Width (Hz)       | 7507.11 | Temperature (degree C) | 21.900               |              |                                            |                 |                  |         |              |

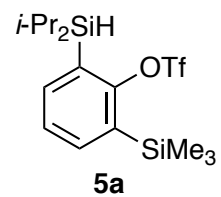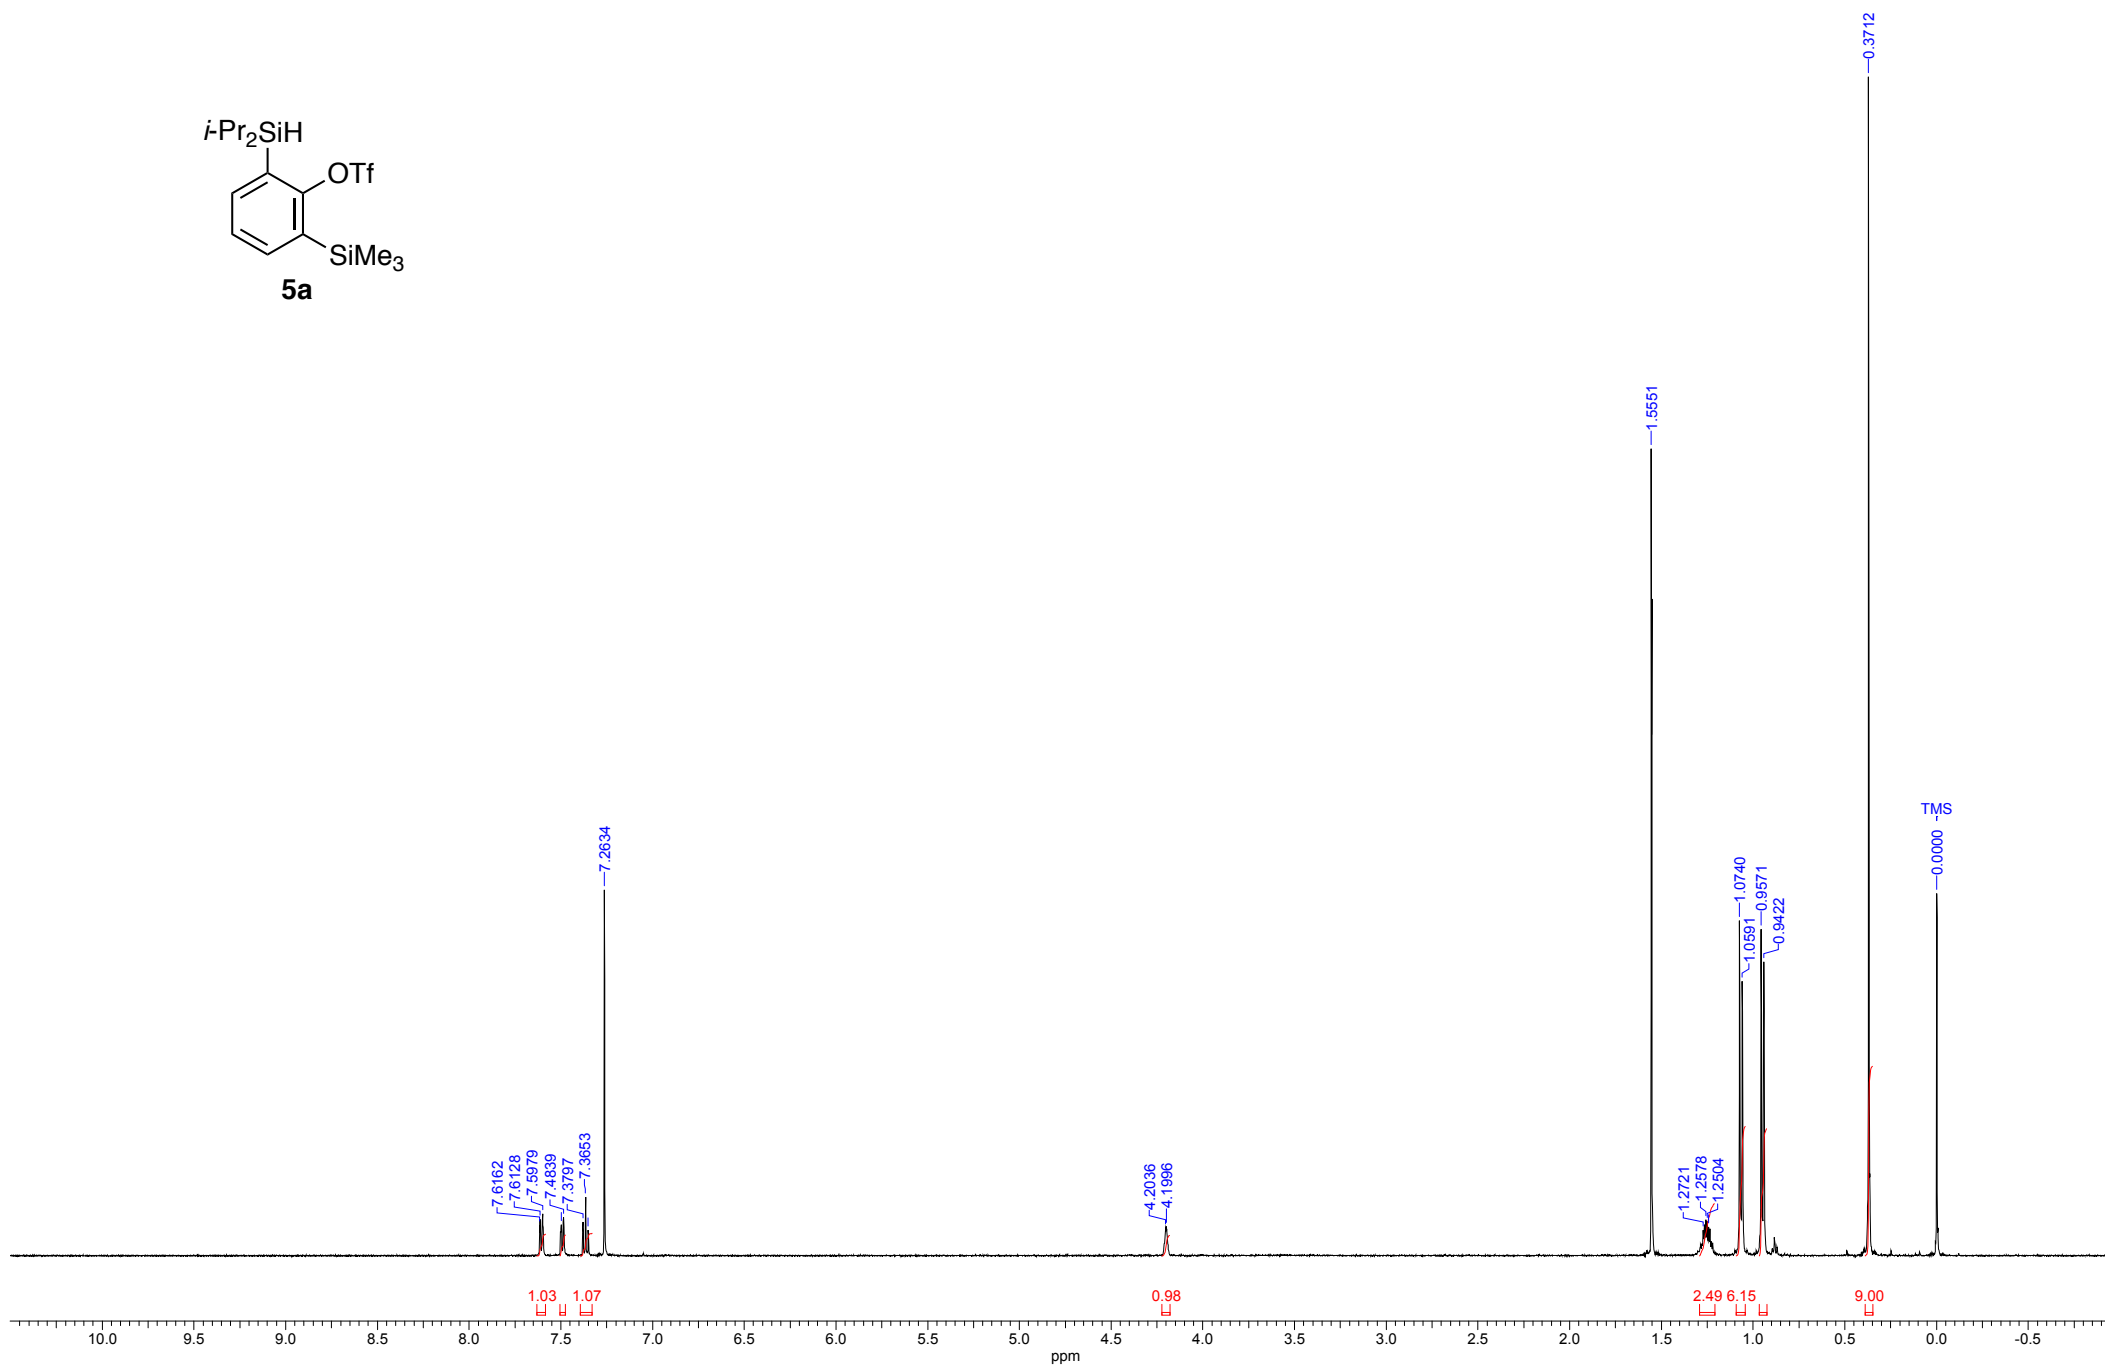

|                        |          |                        |                      |              |                                        |                 |                  |         |              |
|------------------------|----------|------------------------|----------------------|--------------|----------------------------------------|-----------------|------------------|---------|--------------|
| Acquisition Time (sec) | 0.8336   | Date                   | 20 Jun 2020 19:26:52 | File Name    | F:\NMR_CE t H \tawarani\TT0471-13C.als | Frequency (MHz) | 125.00           | Nucleus | 13C          |
| Number of Transients   | 256      | Original Points Count  | 26214                | Points Count | 26214                                  | Pulse Sequence  | single_pulse_dec | Solvent | CHLOROFORM-D |
| Sweep Width (Hz)       | 31444.86 | Temperature (degree C) | 22.500               |              |                                        |                 |                  |         |              |

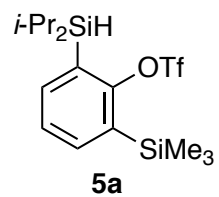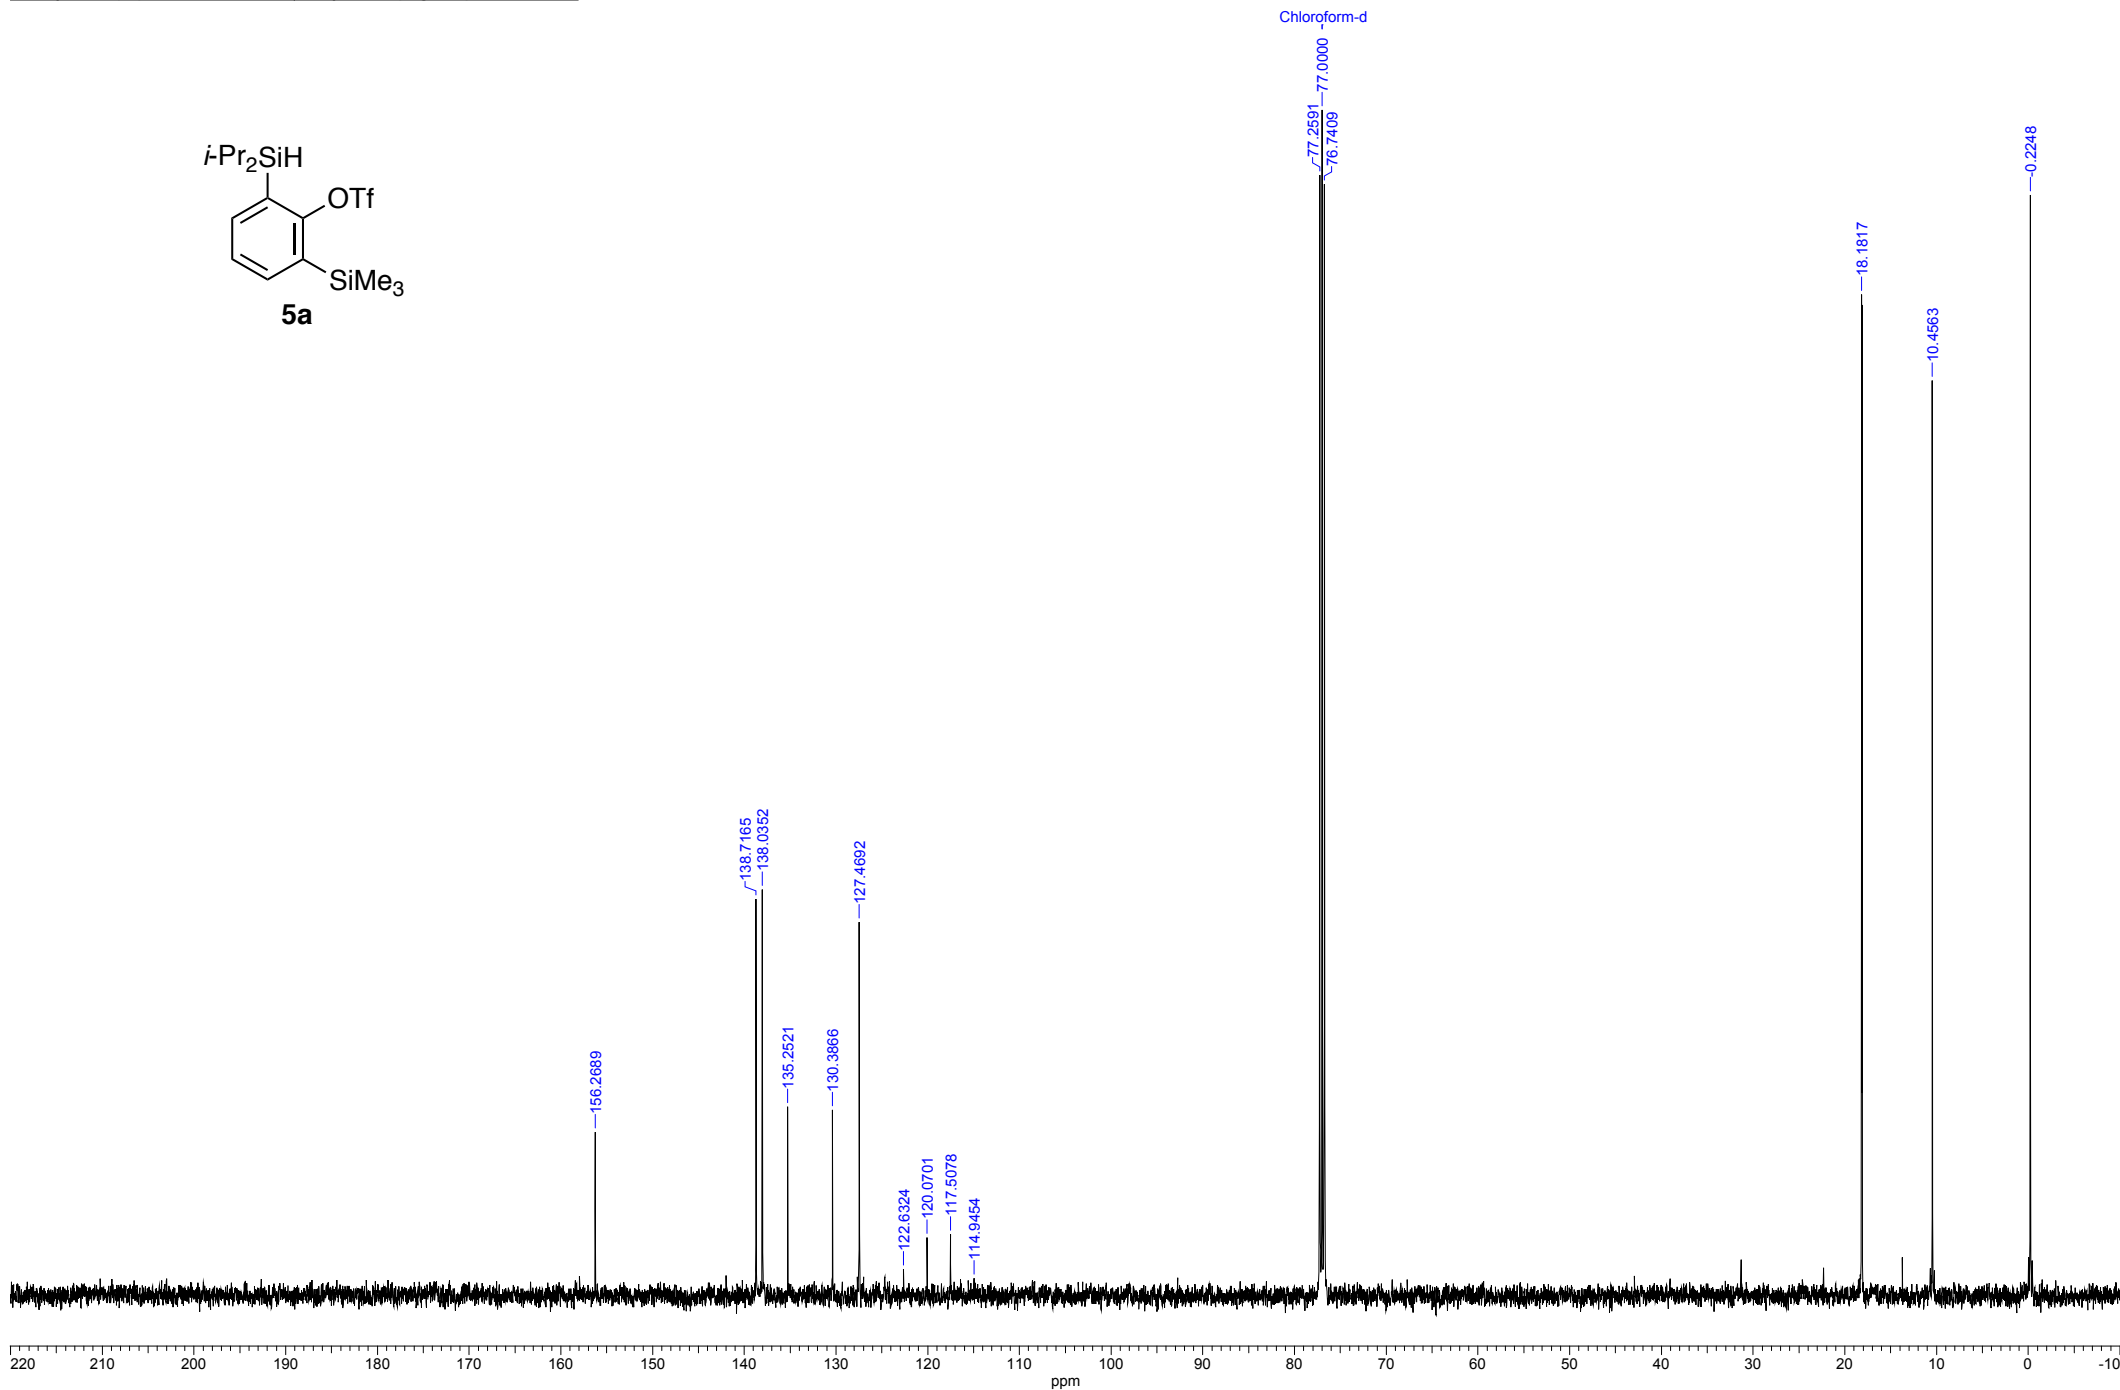

|                        |         |                        |                      |              |                                               |                 |                  |         |              |
|------------------------|---------|------------------------|----------------------|--------------|-----------------------------------------------|-----------------|------------------|---------|--------------|
| Acquisition Time (sec) | 3.4918  | Date                   | 25 Jun 2020 20:25:04 | File Name    | F:\NMR CE t H \tawatani\TT0474-1Hretake-1.als | Frequency (MHz) | 500.16           | Nucleus | 1H           |
| Number of Transients   | 8       | Original Points Count  | 26214                | Points Count | 26214                                         | Pulse Sequence  | single_pulse.ex2 | Solvent | CHLOROFORM-D |
| Sweep Width (Hz)       | 7507.39 | Temperature (degree C) | 22.200               |              |                                               |                 |                  |         |              |

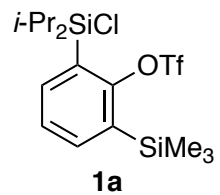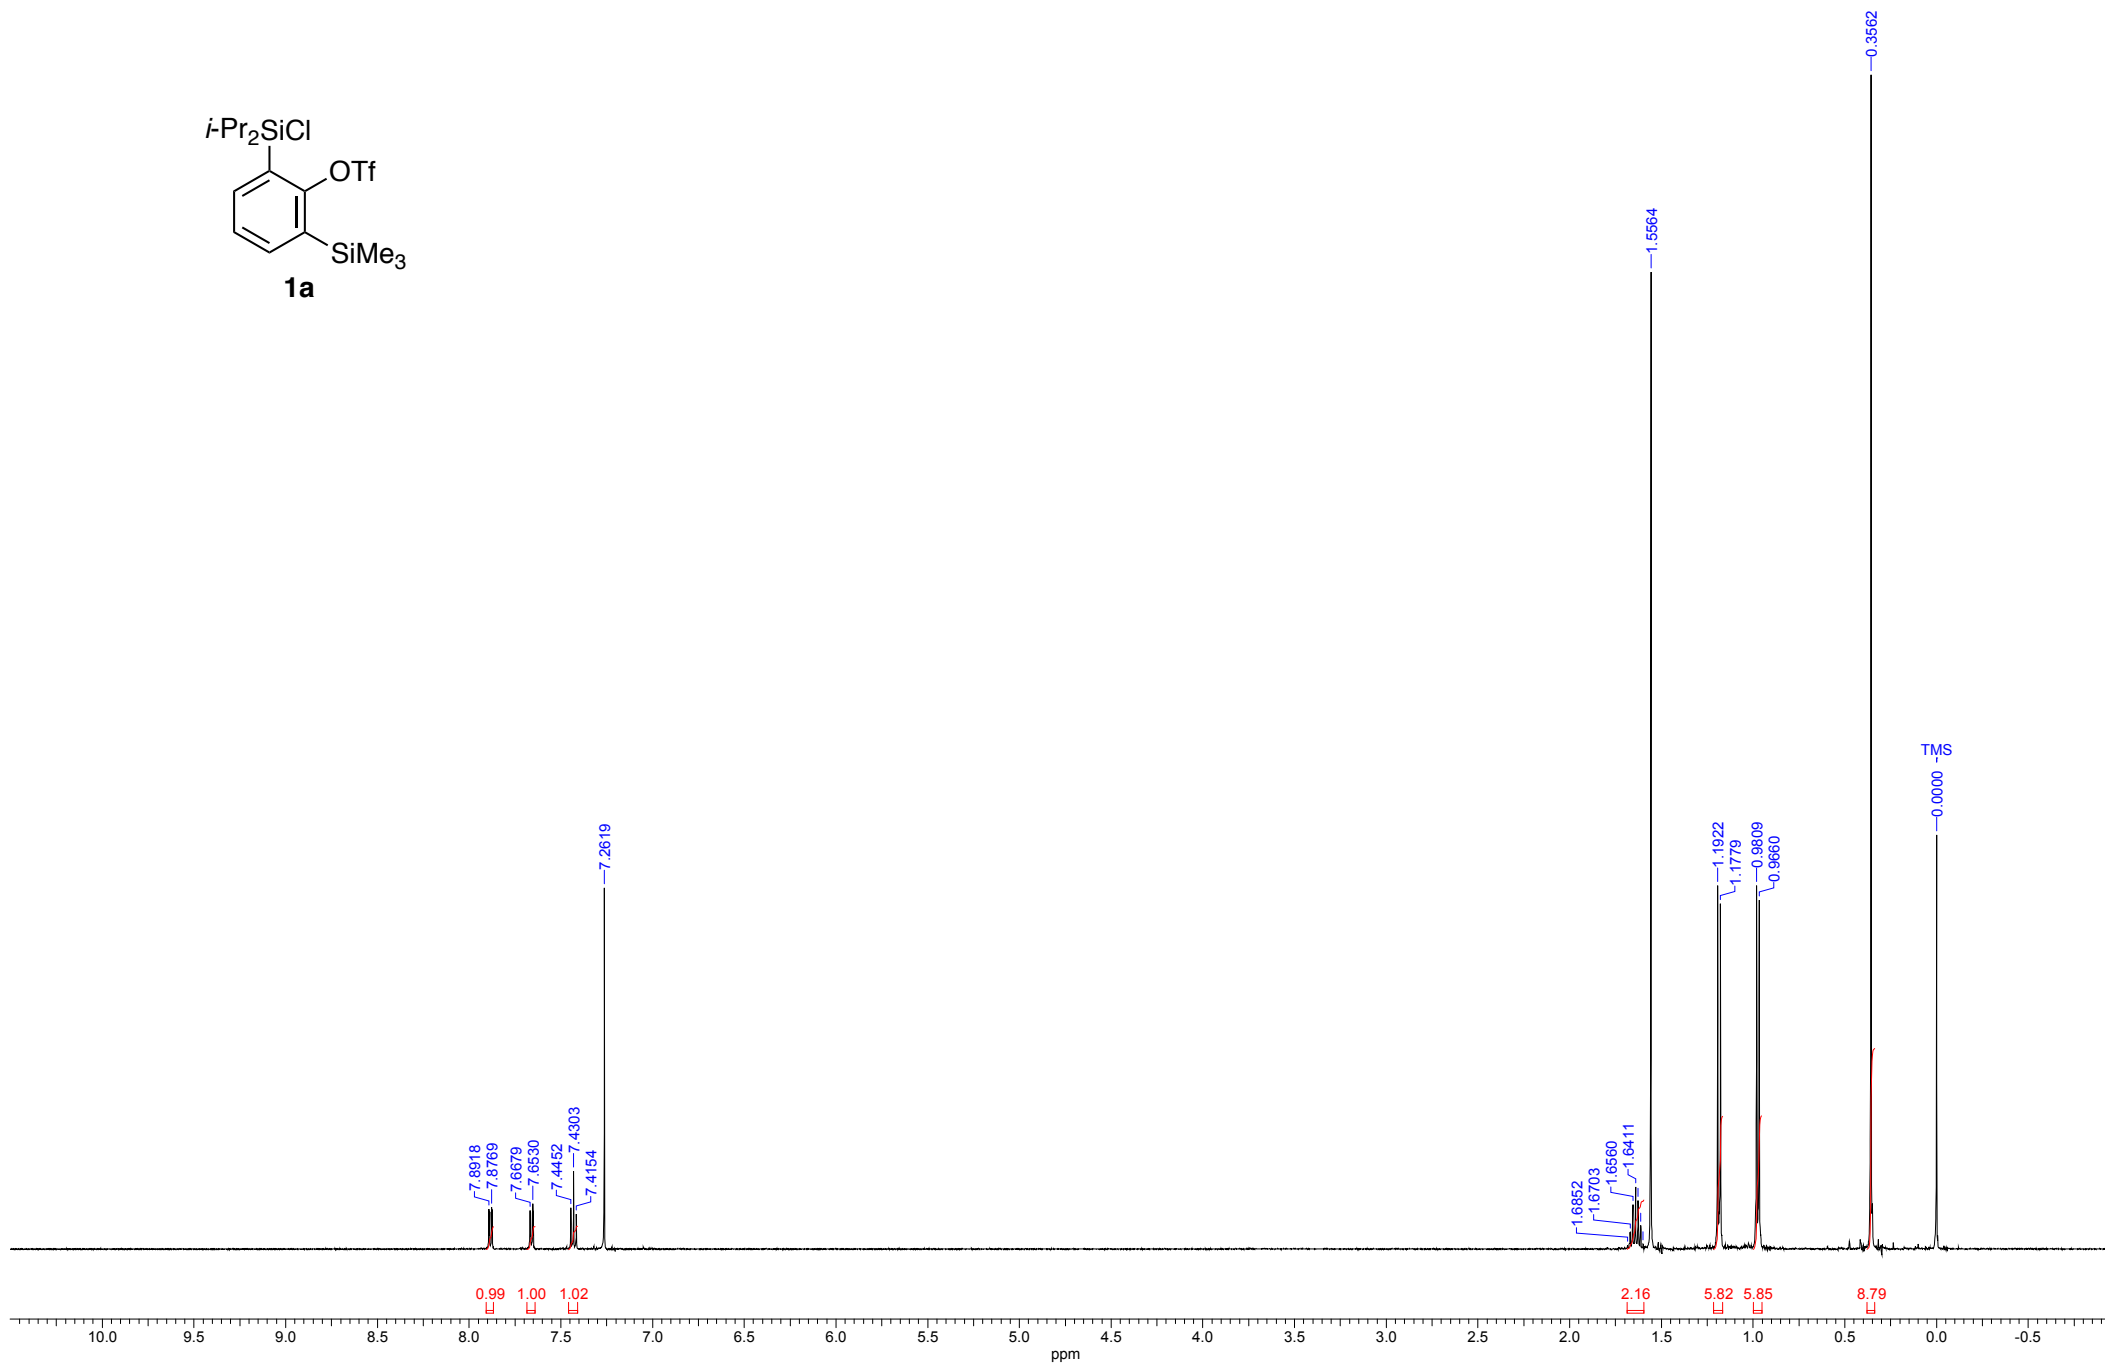

|                        |          |                        |                      |              |                                               |                 |                  |         |              |
|------------------------|----------|------------------------|----------------------|--------------|-----------------------------------------------|-----------------|------------------|---------|--------------|
| Acquisition Time (sec) | 0.8336   | Date                   | 25 Jun 2020 20:25:12 | File Name    | F:\NMR_CE_t_H\tawatari\TT0474-13Cretake-1.als | Frequency (MHz) | 125.77           | Nucleus | 13C          |
| Number of Transients   | 256      | Original Points Count  | 26214                | Points Count | 26214                                         | Pulse Sequence  | single_pulse_dec | Solvent | CHLOROFORM-D |
| Sweep Width (Hz)       | 31446.06 | Temperature (degree C) | 22.700               |              |                                               |                 |                  |         |              |

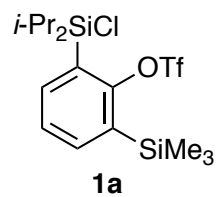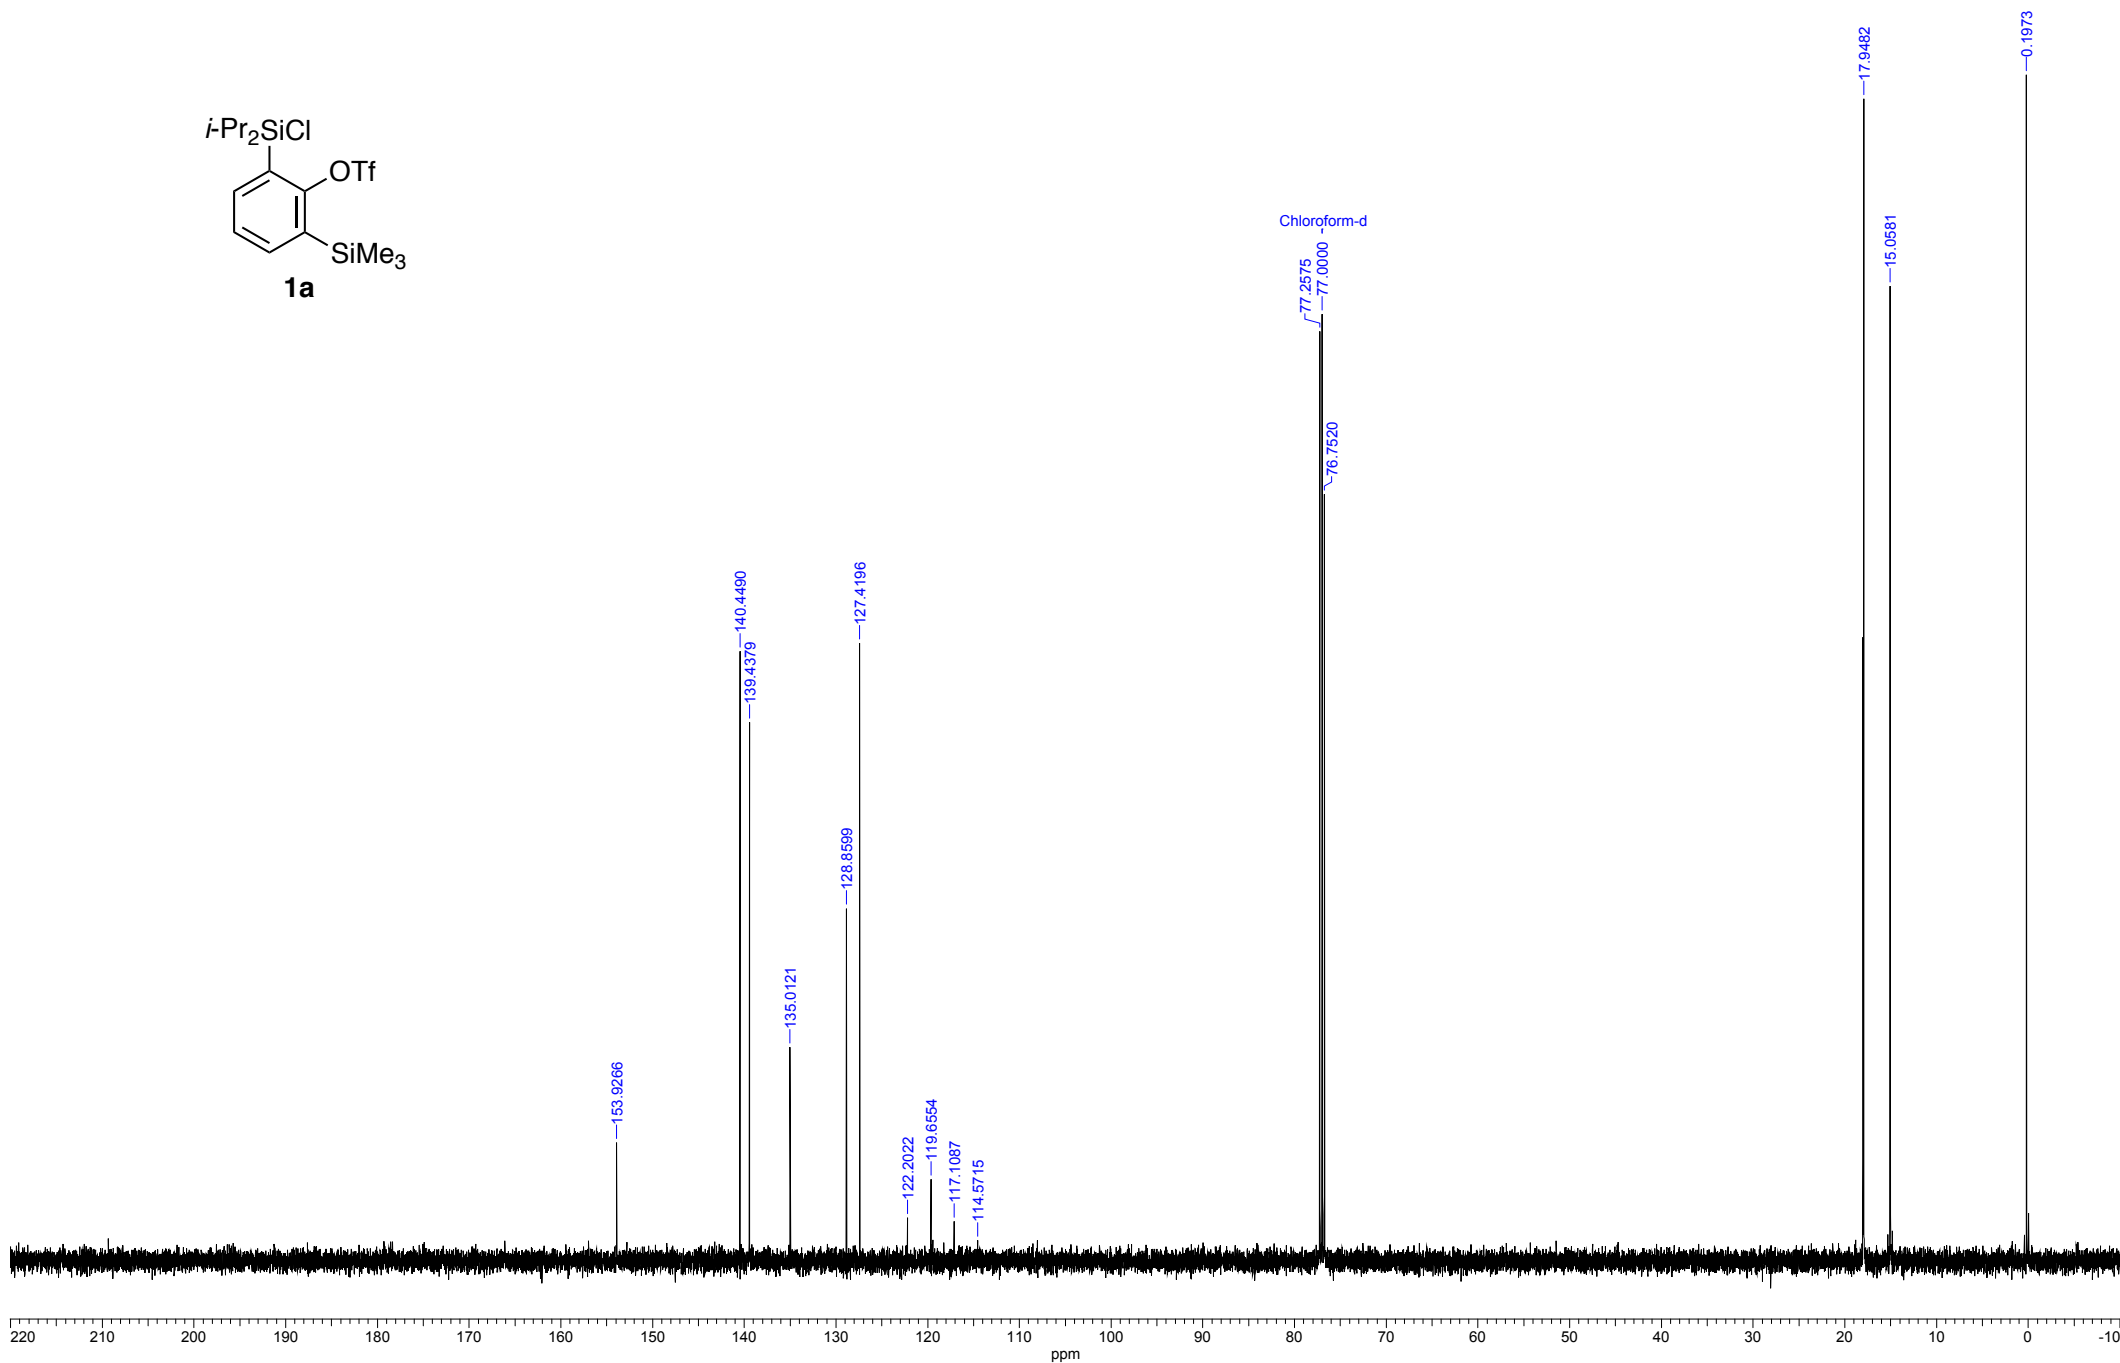

|                        |         |                        |              |                      |                      |                       |                                                  |
|------------------------|---------|------------------------|--------------|----------------------|----------------------|-----------------------|--------------------------------------------------|
| Acquisition Time (sec) | 1.8153  | Comment                | single pulse | Date                 | 18 Jun 2021 12:58:50 | File Name             | F:\NMR CE t H \tawatari\TT0530-1H_proton-1-2.als |
| Frequency (MHz)        | 600.17  | Nucleus                | 1H           | Number of Transients | 8                    | Original Points Count | 16384                                            |
| Sweep Width (Hz)       | 9025.27 | Temperature (degree C) | 21.300       | Points Count         | 13120                | Pulse Sequence        | proton.jxp                                       |
|                        |         |                        |              |                      |                      | Solvent               | CHLOROFORM-D                                     |

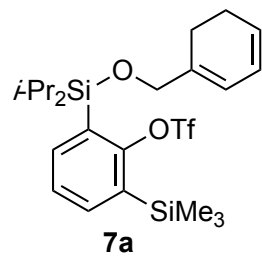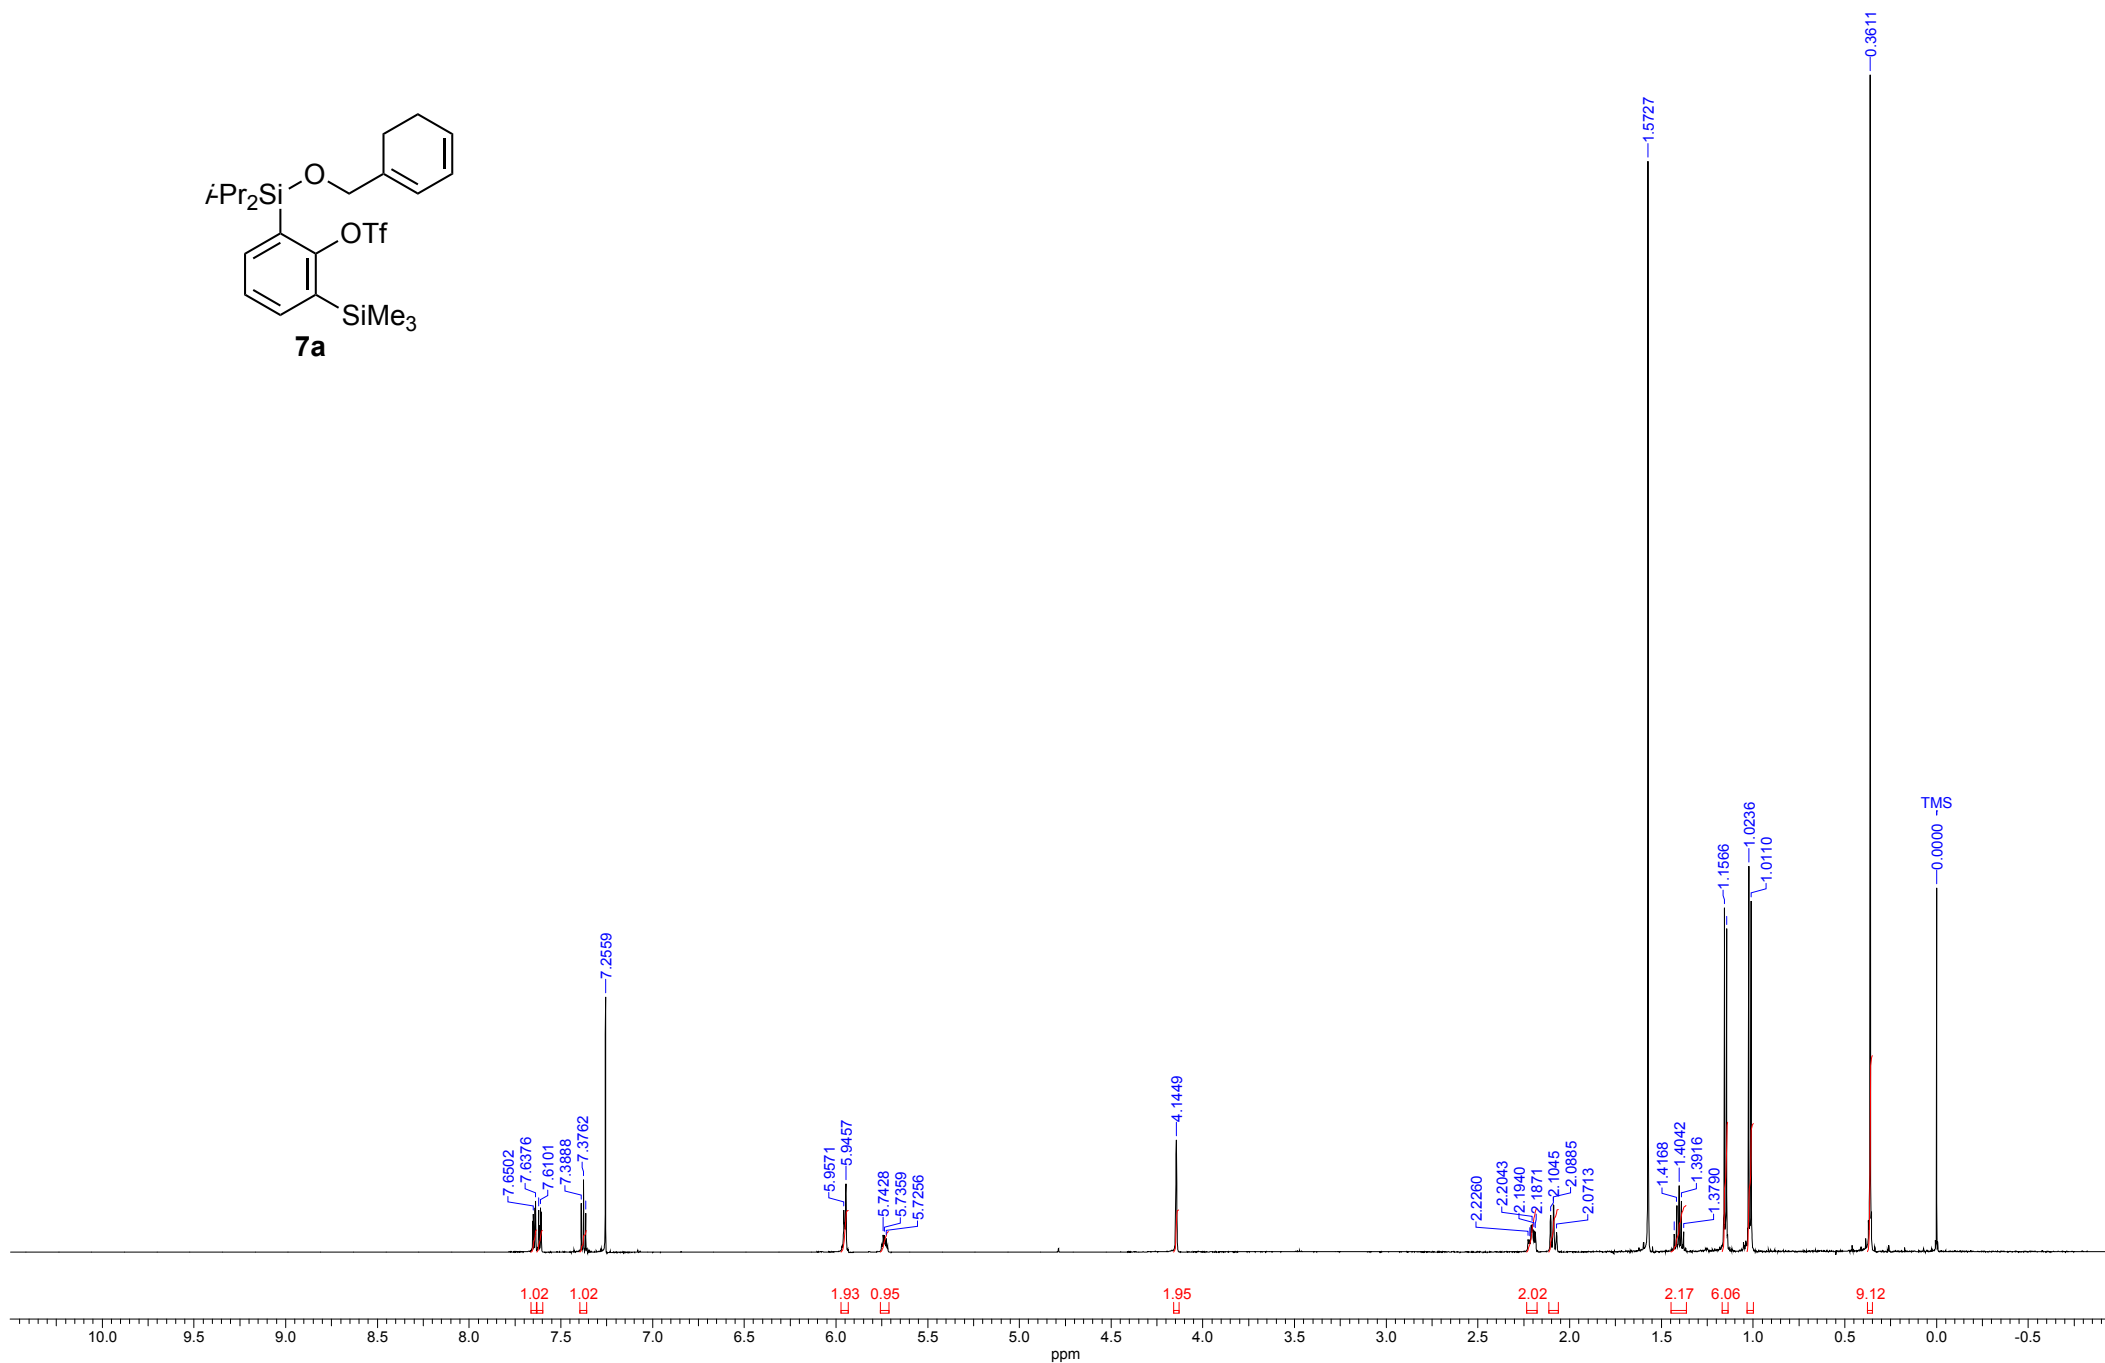

|                        |          |                        |                                  |                       |                      |                |                                                |
|------------------------|----------|------------------------|----------------------------------|-----------------------|----------------------|----------------|------------------------------------------------|
| Acquisition Time (sec) | 0.6921   | Comment                | single pulse decoupled gated NOE | Date                  | 08 Aug 2020 12:31:08 | File Name      | F:\NMR_CE_t_H\tawatari\TT0530-13C_carbon-1.als |
| Frequency (MHz)        | 150.00   | Number of Transients   | 401                              | Points Count          | 26214                | Pulse Sequence | carbon_cool.jxp                                |
| Sweep Width (Hz)       | 37876.77 | Temperature (degree C) | 21.500                           | Original Points Count | 26214                | Solvent        | CHLOROFORM-D                                   |

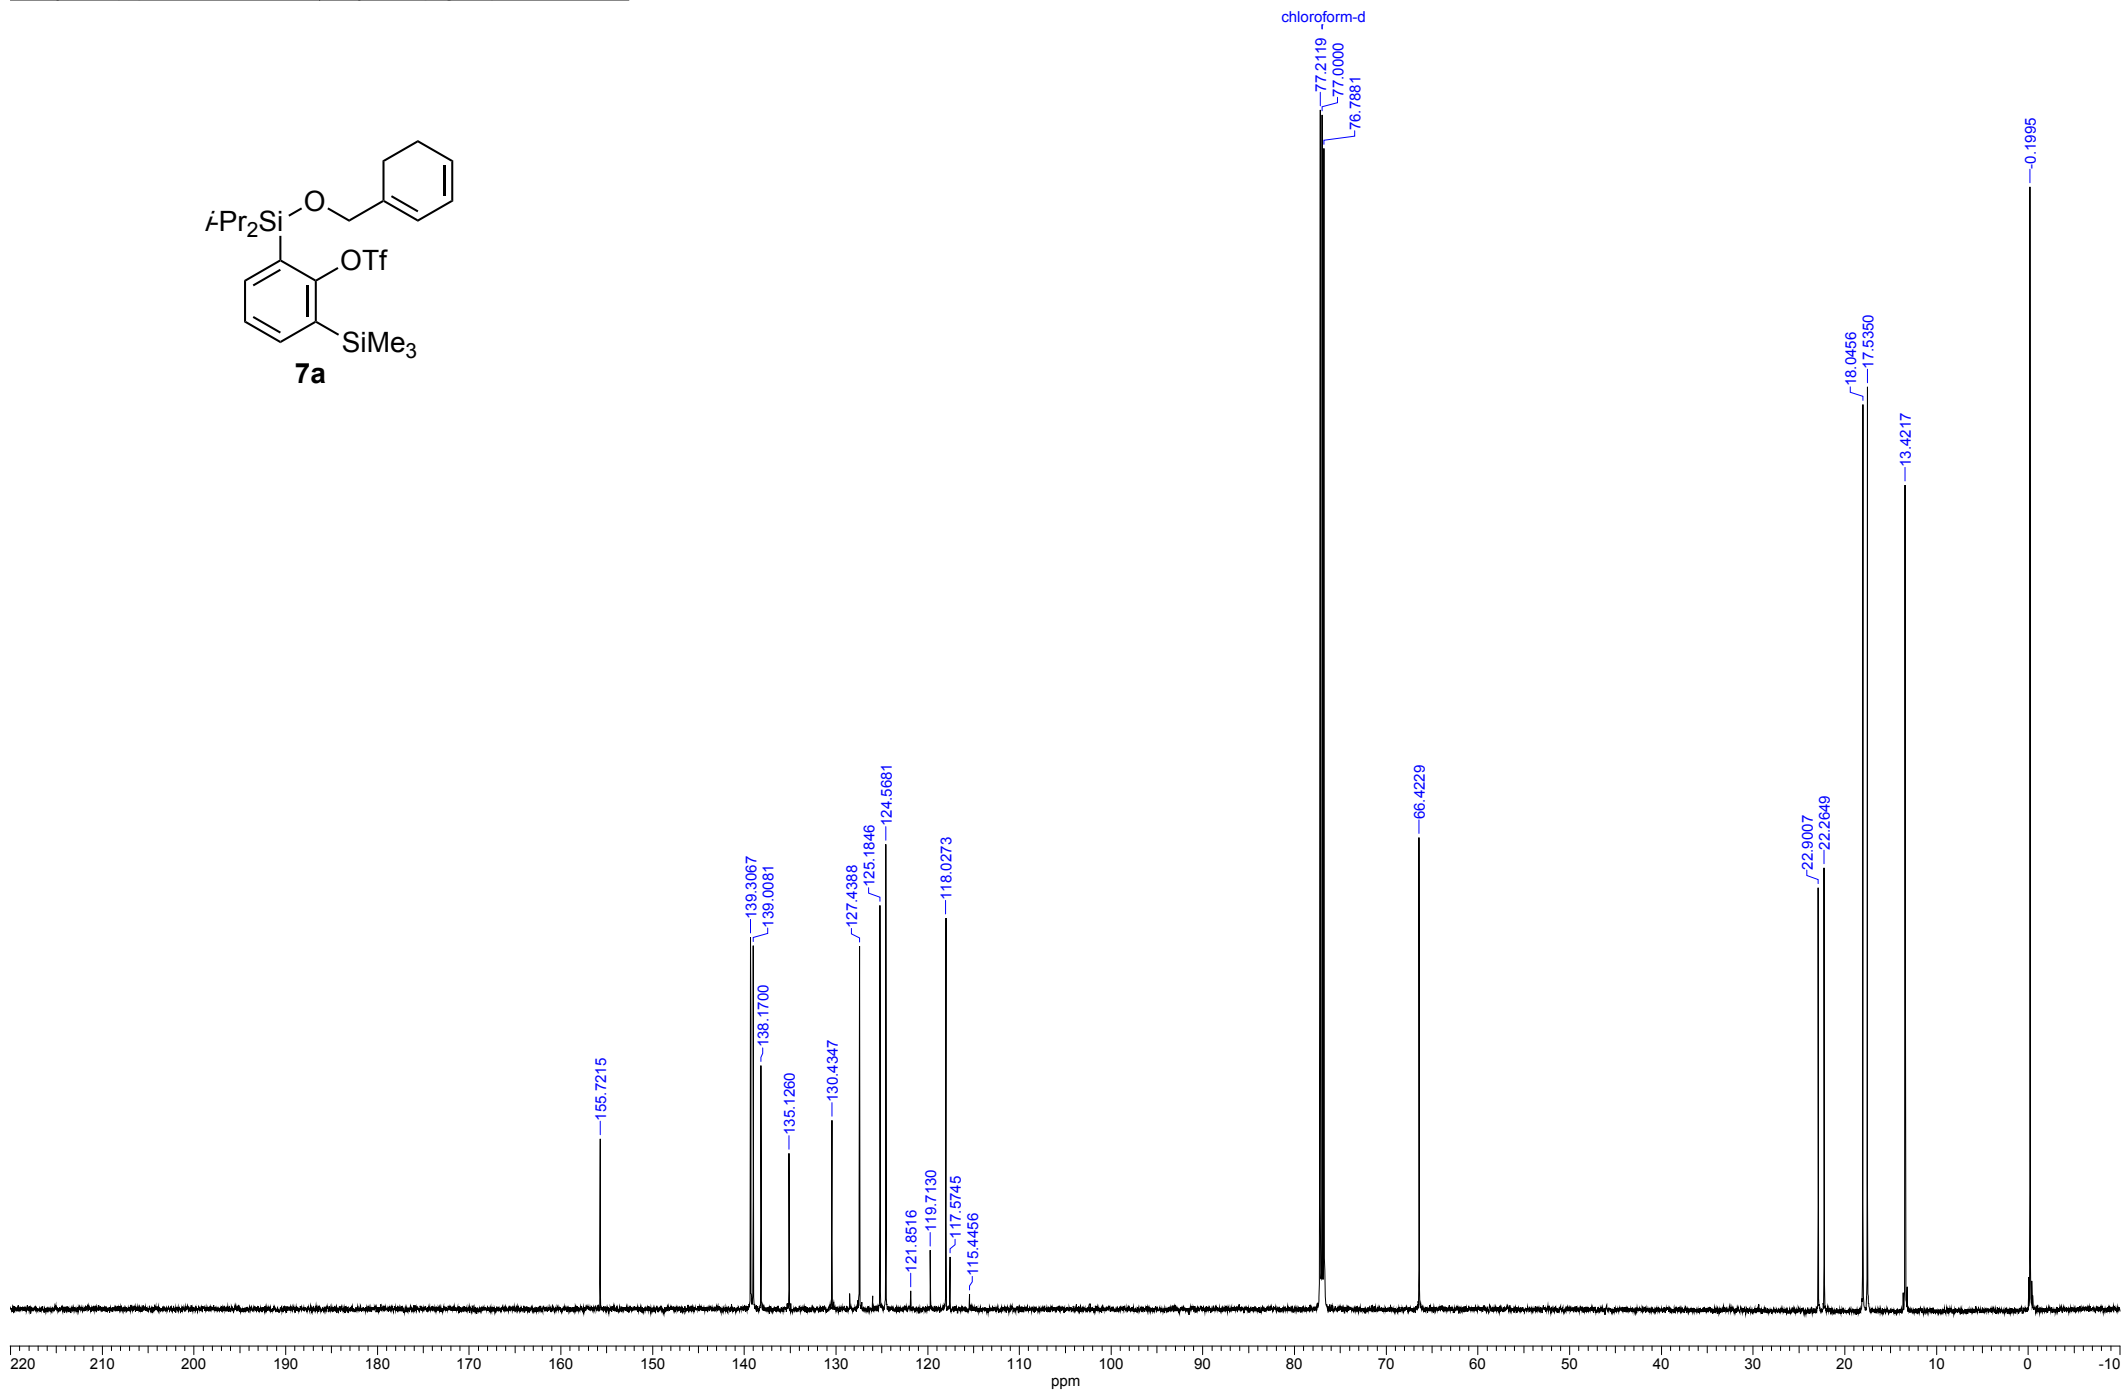

|                        |         |                        |                      |              |                                           |                 |                  |         |              |
|------------------------|---------|------------------------|----------------------|--------------|-------------------------------------------|-----------------|------------------|---------|--------------|
| Acquisition Time (sec) | 3.4918  | Date                   | 15 Oct 2020 17:30:10 | File Name    | F:\NMR_CE_t_H\tawatari\TT0616column-1.als | Frequency (MHz) | 500.16           | Nucleus | 1H           |
| Number of Transients   | 8       | Original Points Count  | 26214                | Points Count | 26214                                     | Pulse Sequence  | single_pulse.ex2 | Solvent | CHLOROFORM-D |
| Sweep Width (Hz)       | 7507.39 | Temperature (degree C) | 18.200               |              |                                           |                 |                  |         |              |

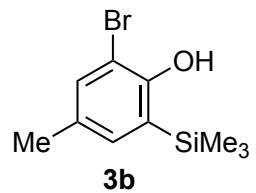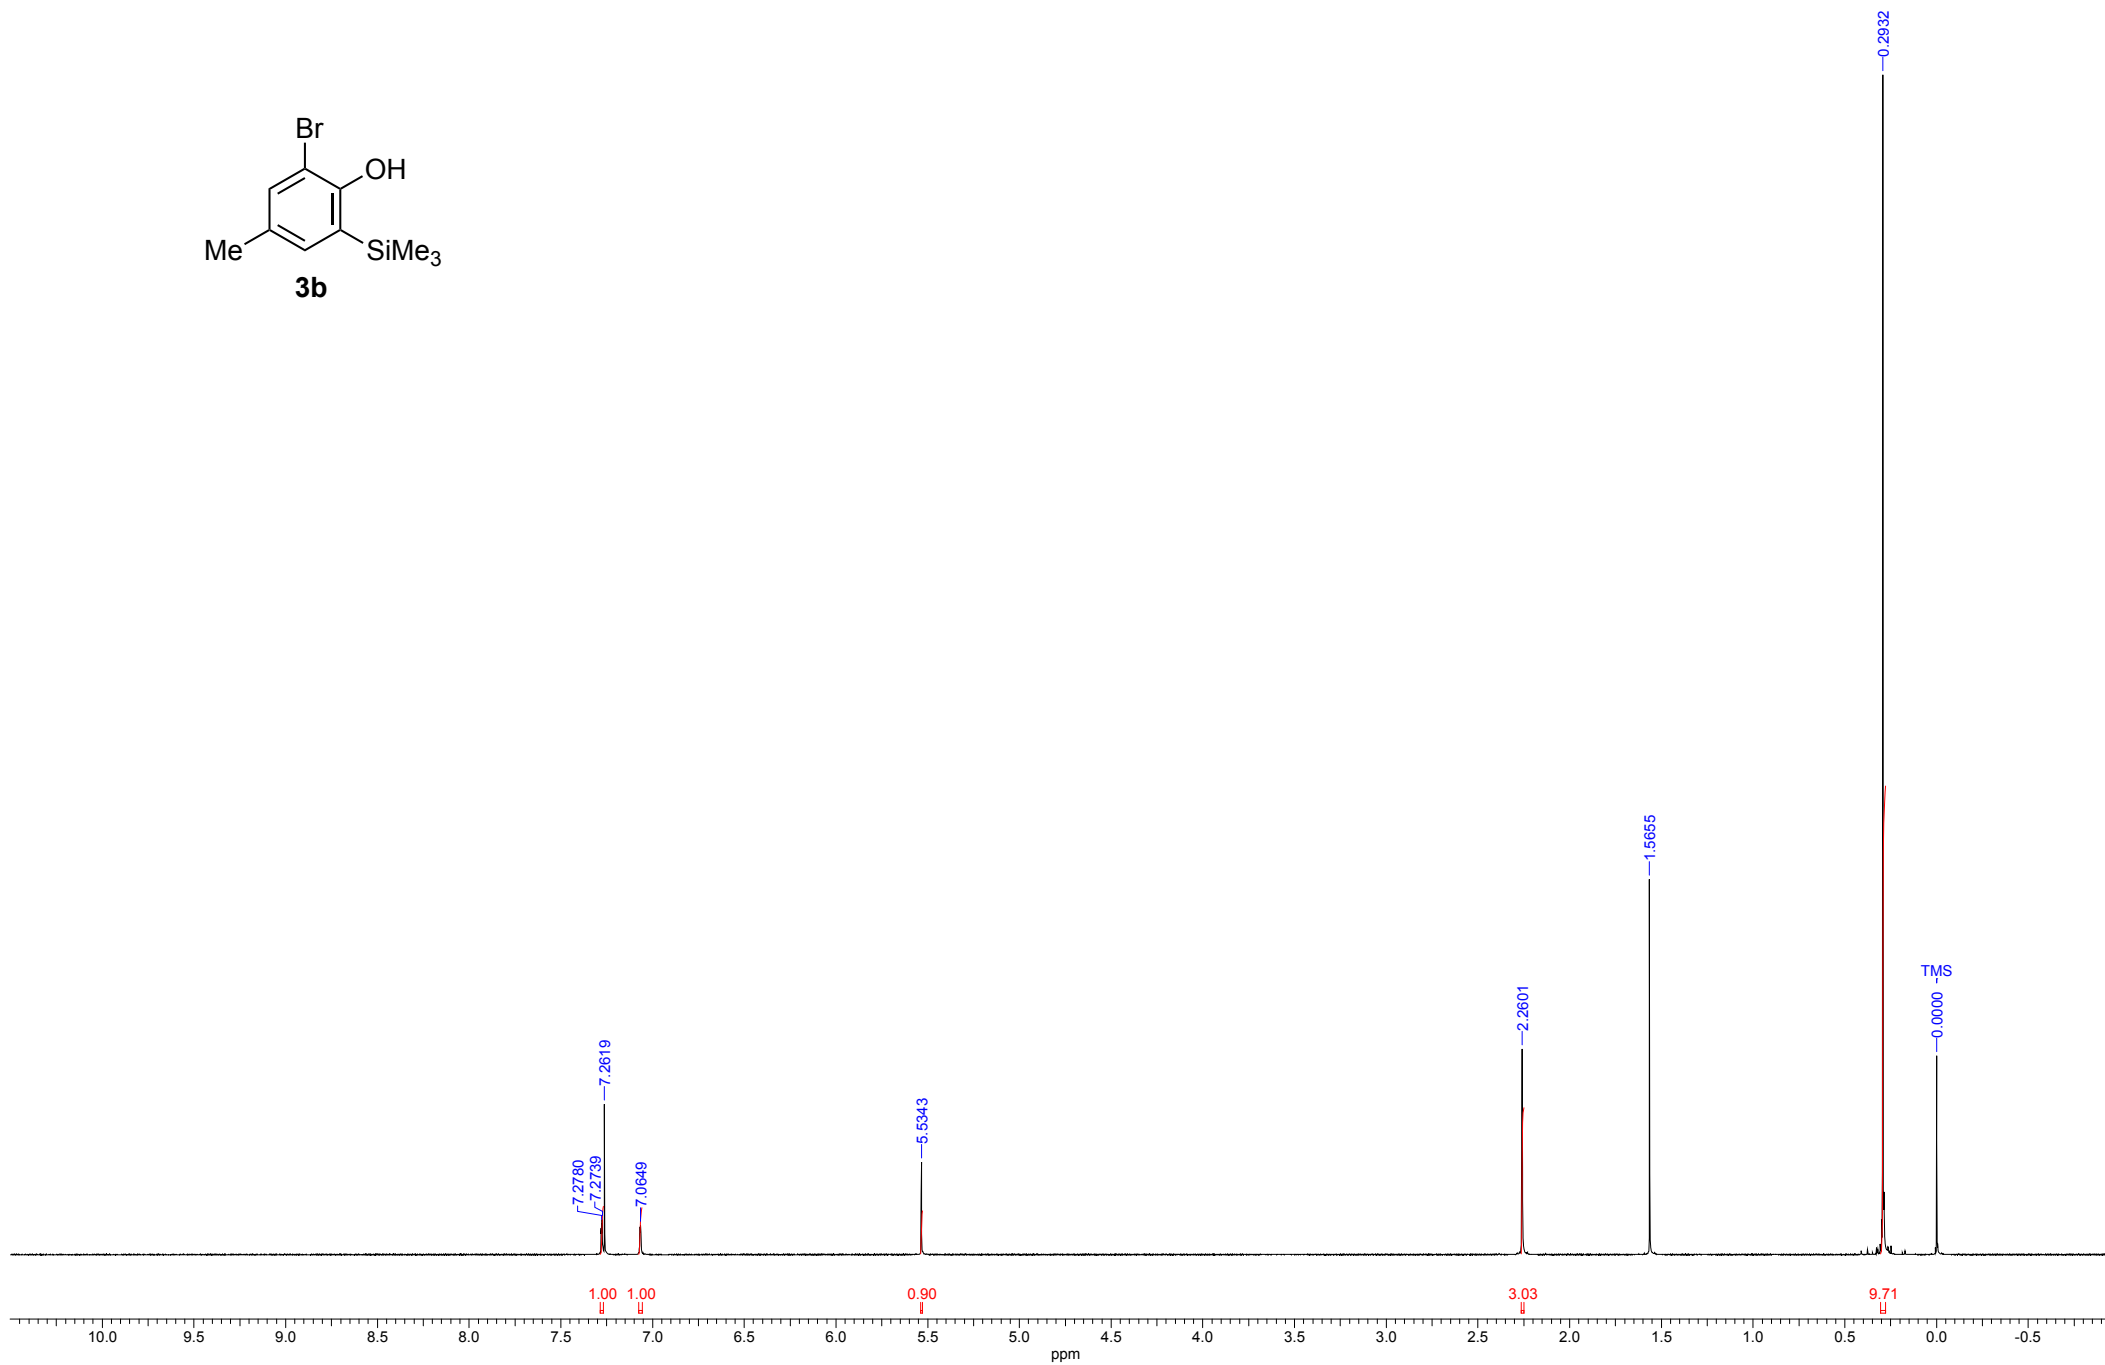



|                        |          |                        |                      |              |                                        |                 |                  |         |              |
|------------------------|----------|------------------------|----------------------|--------------|----------------------------------------|-----------------|------------------|---------|--------------|
| Acquisition Time (sec) | 0.8336   | Date                   | 18 Oct 2020 23:11:34 | File Name    | F:\NMR_CE_t_H\tawatar\TT0616-13C-1.als | Frequency (MHz) | 125.77           | Nucleus | 13C          |
| Number of Transients   | 256      | Original Points Count  | 26214                | Points Count | 26214                                  | Pulse Sequence  | single_pulse_dec | Solvent | CHLOROFORM-D |
| Sweep Width (Hz)       | 31446.06 | Temperature (degree C) | 18.700               |              |                                        |                 |                  |         |              |

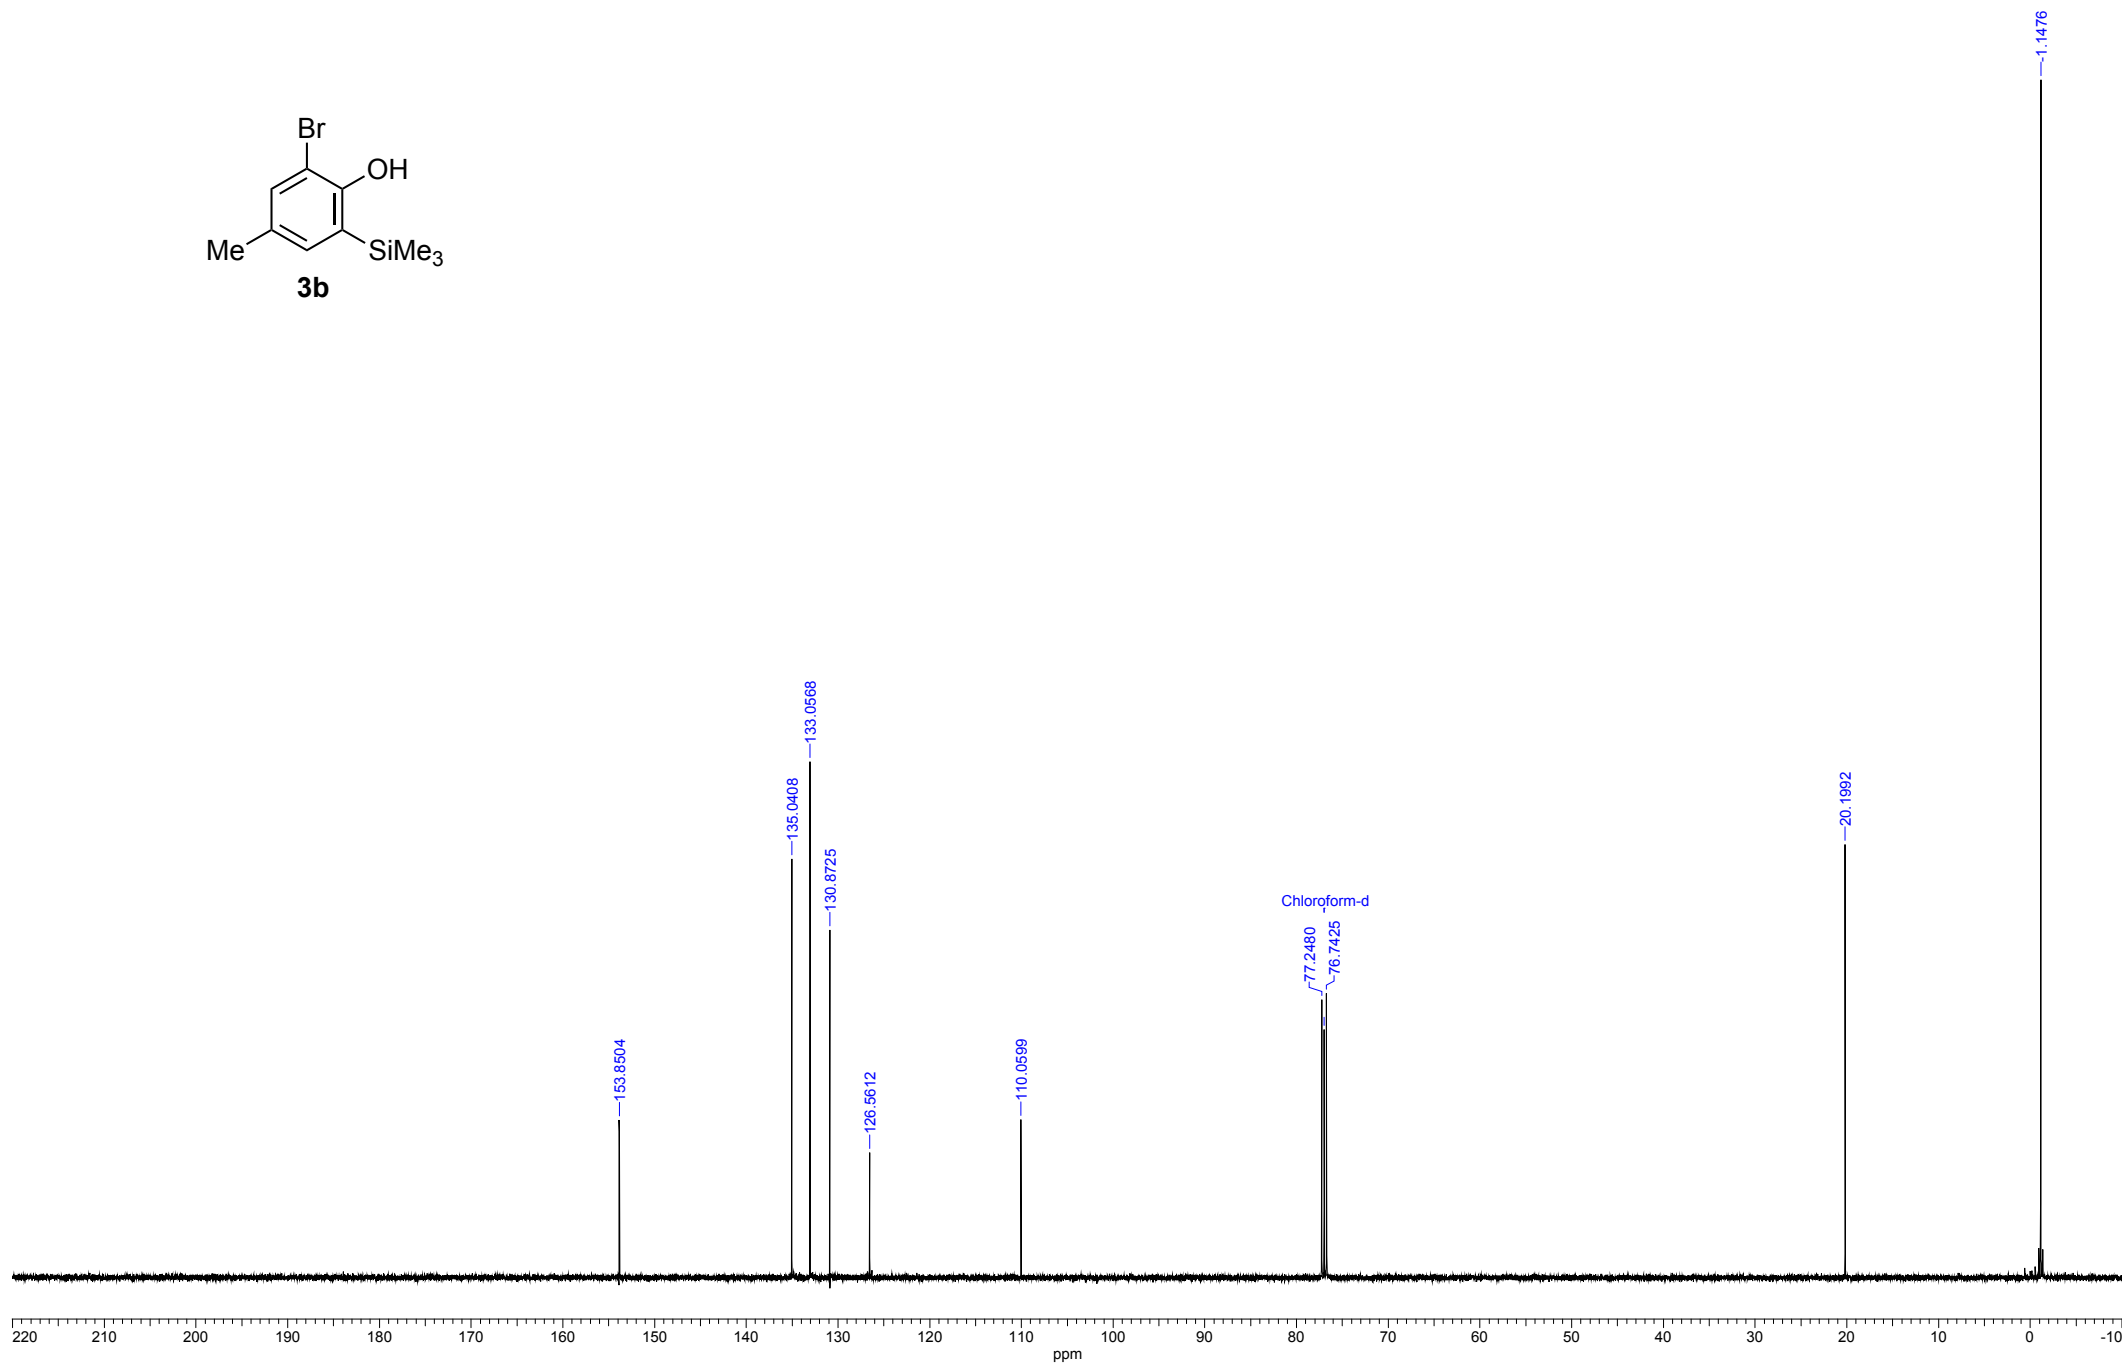

|                        |         |                        |              |                      |                      |                       |                                                 |              |
|------------------------|---------|------------------------|--------------|----------------------|----------------------|-----------------------|-------------------------------------------------|--------------|
| Acquisition Time (sec) | 1.8153  | Comment                | single pulse | Date                 | 18 Jun 2021 16:00:50 | File Name             | F:\NMR CE t H \tawatari\T0671-1H_proton-1-1.als |              |
| Frequency (MHz)        | 600.17  | Nucleus                | 1H           | Number of Transients | 8                    | Original Points Count | 16384                                           |              |
| Sweep Width (Hz)       | 9025.27 | Temperature (degree C) | 19.200       | Points Count         | 13120                | Pulse Sequence        | proton.jxp                                      |              |
|                        |         |                        |              |                      |                      |                       | Solvent                                         | CHLOROFORM-D |

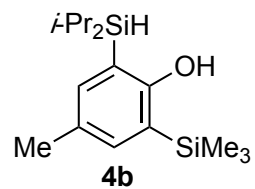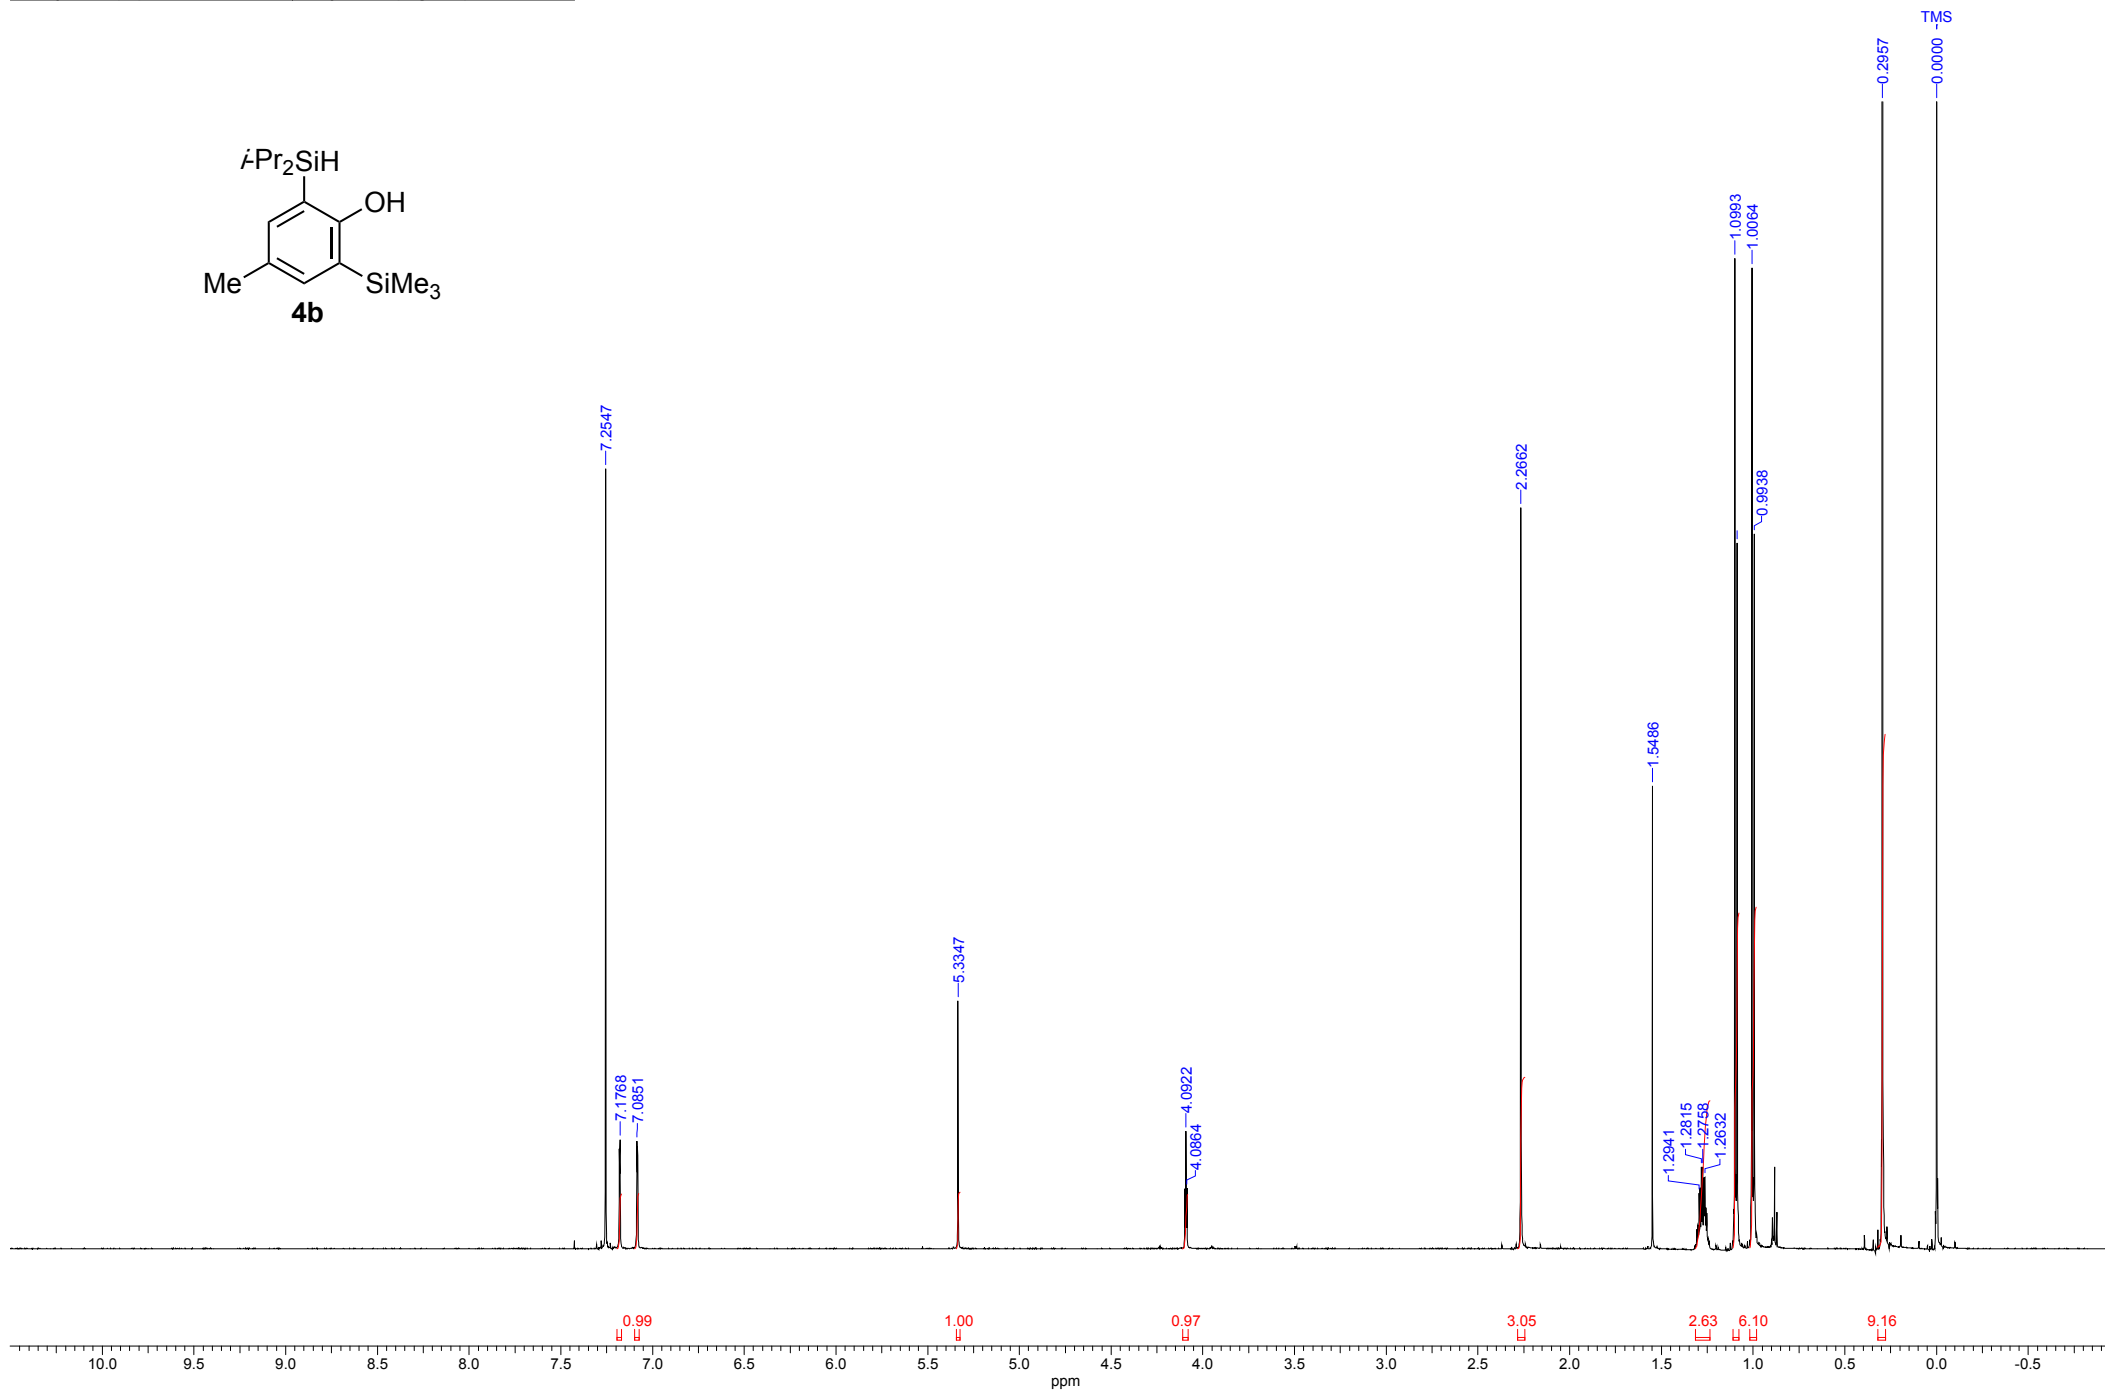

|                        |          |                        |                                  |                       |                      |              |                                                |
|------------------------|----------|------------------------|----------------------------------|-----------------------|----------------------|--------------|------------------------------------------------|
| Acquisition Time (sec) | 0.6921   | Comment                | single pulse decoupled gated NOE | Date                  | 25 Dec 2020 14:14:30 | File Name    | F:\NMR_CE_t_H\tawatari\TT0671-13C carbon-1.als |
| Frequency (MHz)        | 150.00   | Number of Transients   | 256                              | Original Points Count | 26214                | Points Count | 26214                                          |
| Sweep Width (Hz)       | 37876.77 | Temperature (degree C) | 19.300                           | Pulse Sequence        | carbon_cool.jxp      | Solvent      | CHLOROFORM-D                                   |

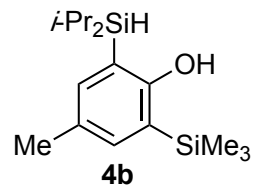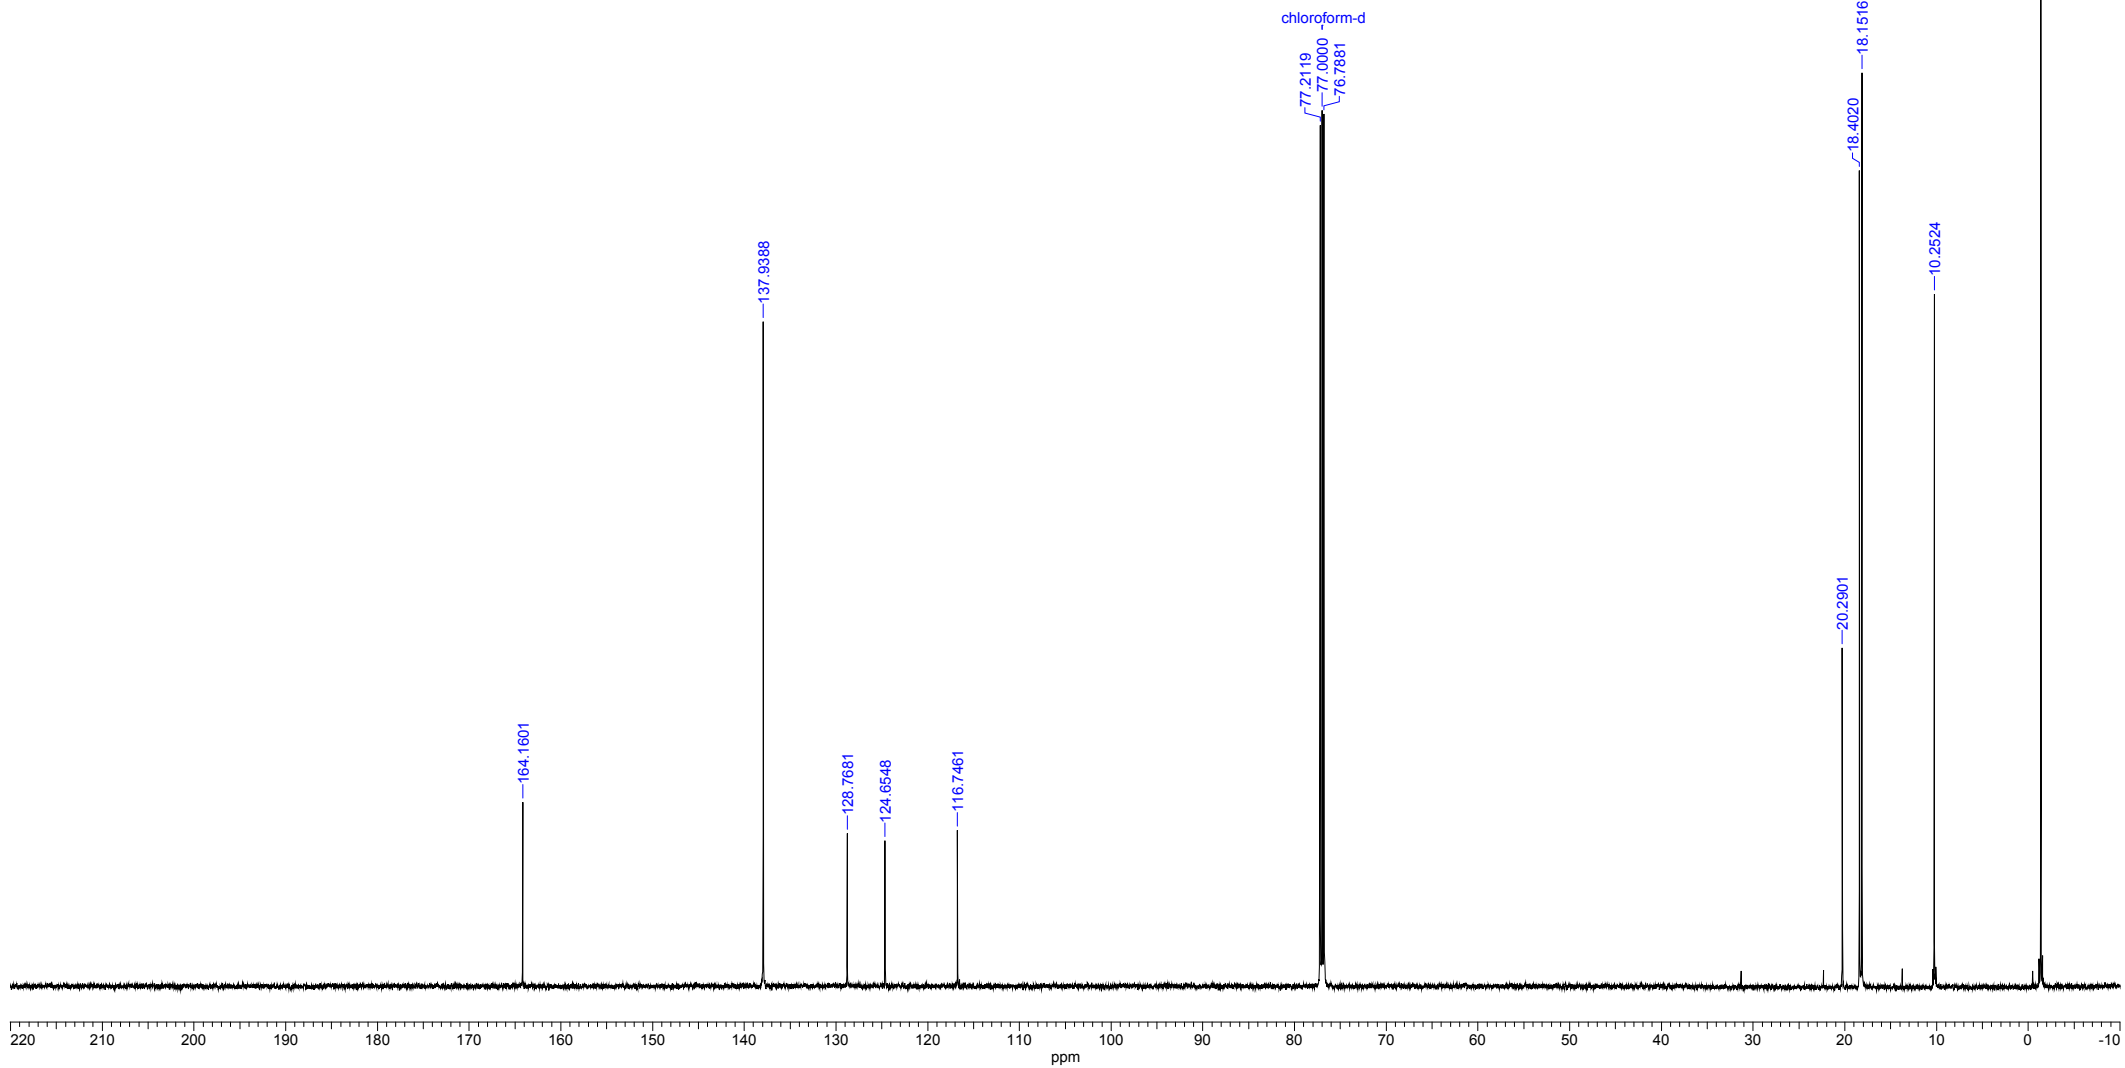

|                        |         |                        |                      |              |                                                  |                 |                  |         |              |
|------------------------|---------|------------------------|----------------------|--------------|--------------------------------------------------|-----------------|------------------|---------|--------------|
| Acquisition Time (sec) | 3.4918  | Date                   | 20 Oct 2020 21:46:24 | File Name    | F:\NMR CE t H \tawatari\TT0622column-fr7-9-1.als | Frequency (MHz) | 500.16           | Nucleus | 1H           |
| Number of Transients   | 8       | Original Points Count  | 26214                | Points Count | 26214                                            | Pulse Sequence  | single_pulse.ex2 | Solvent | CHLOROFORM-D |
| Sweep Width (Hz)       | 7507.39 | Temperature (degree C) | 20.500               |              |                                                  |                 |                  |         |              |

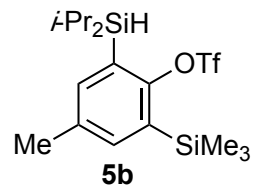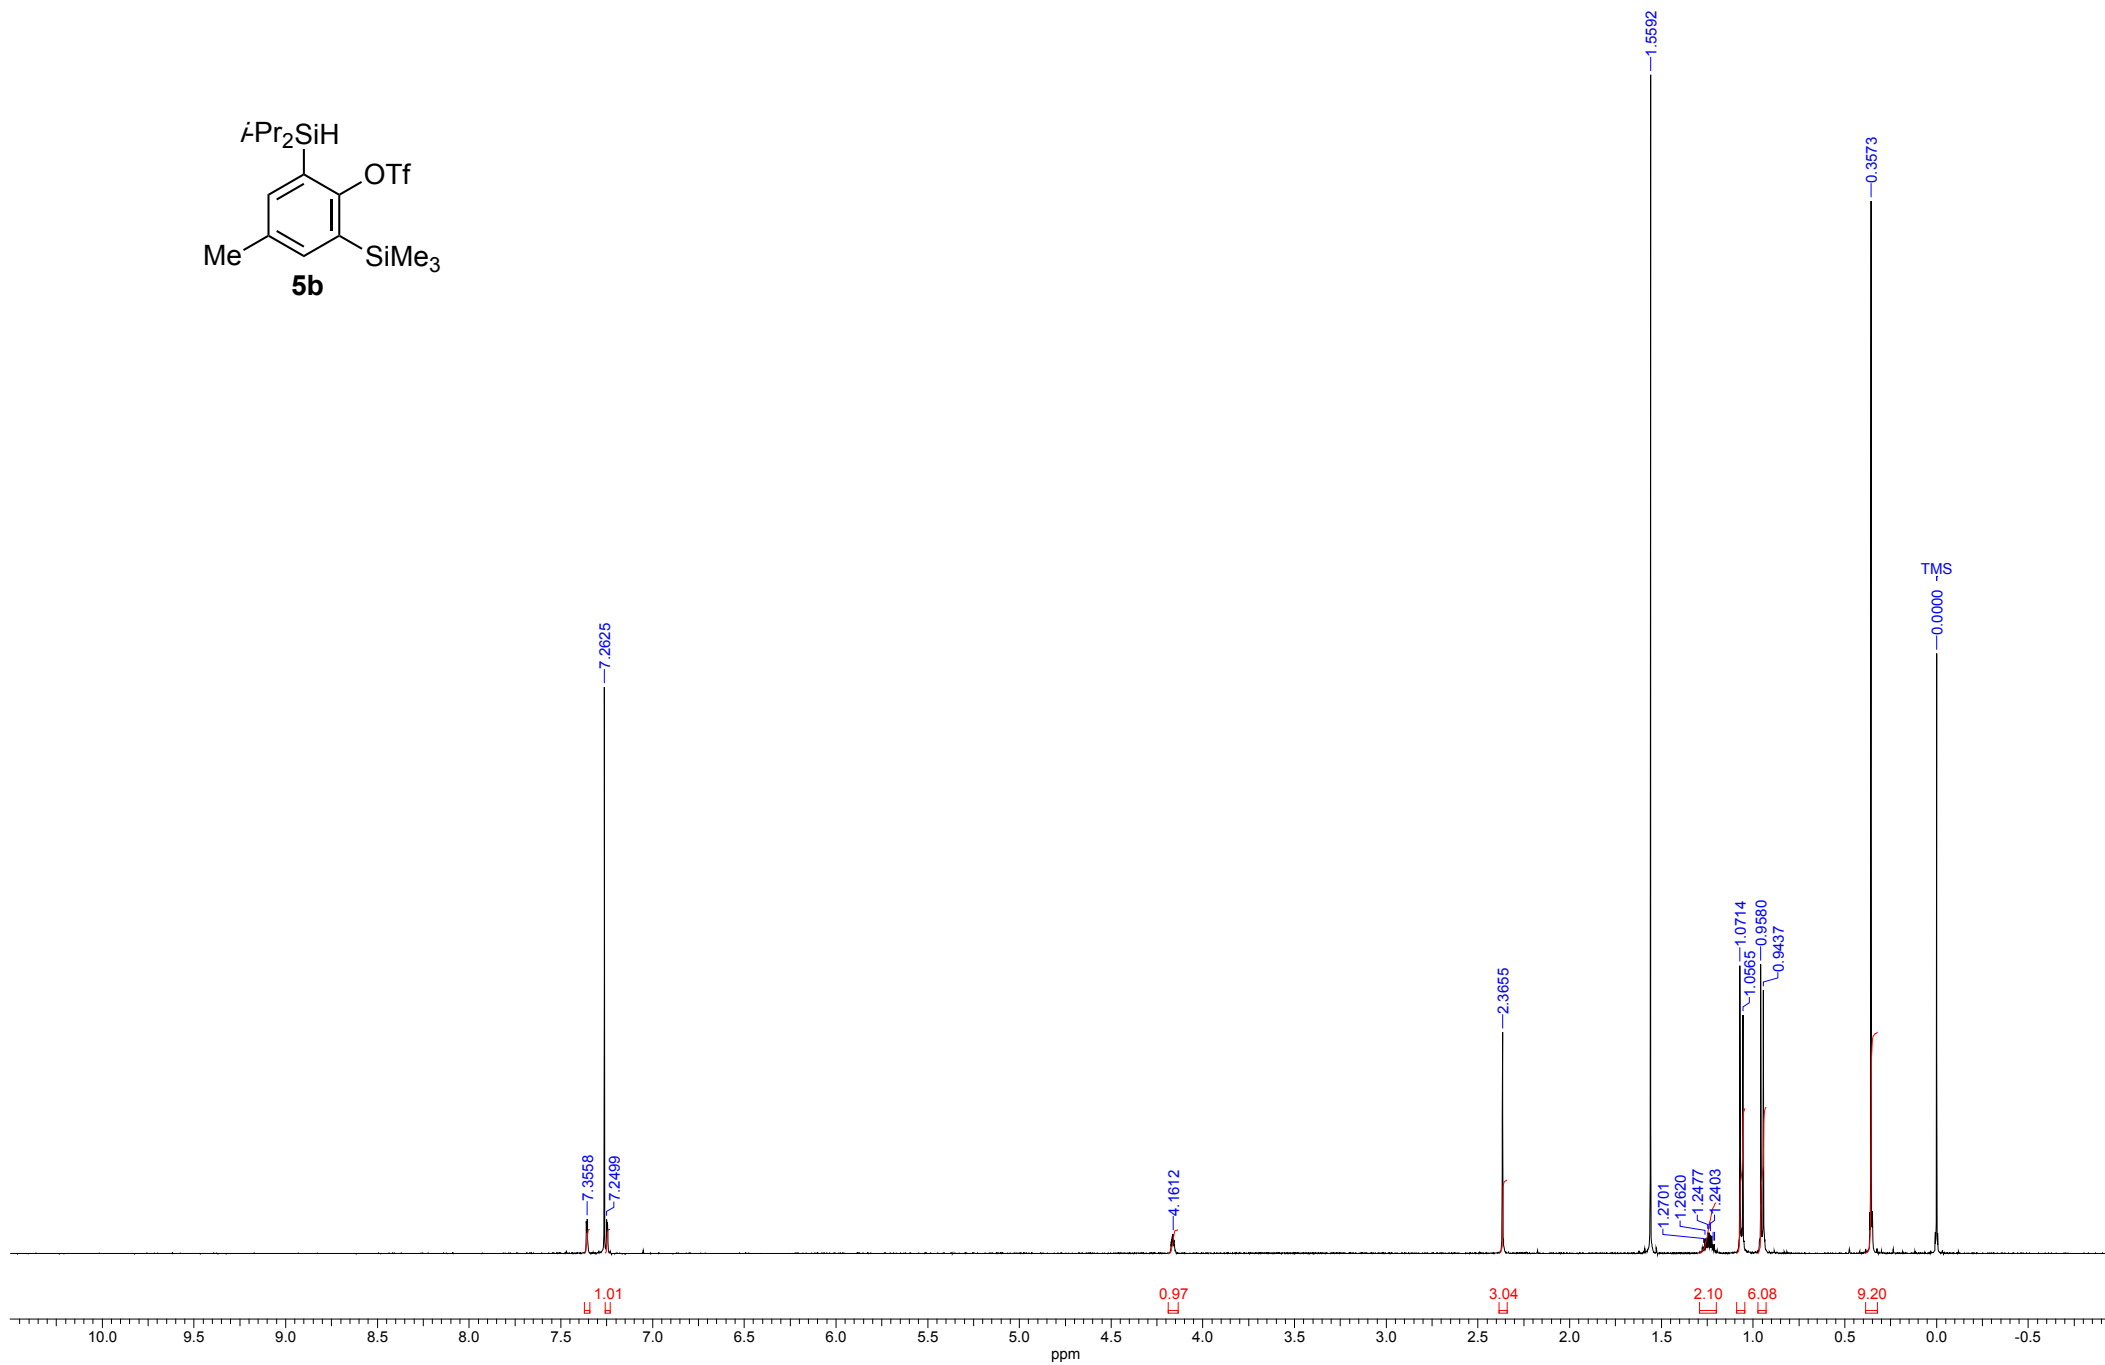

|                        |          |                        |                      |              |                                         |                 |                  |         |              |
|------------------------|----------|------------------------|----------------------|--------------|-----------------------------------------|-----------------|------------------|---------|--------------|
| Acquisition Time (sec) | 0.8336   | Date                   | 20 Oct 2020 22:51:38 | File Name    | F:\NMR_CE_t_H\tawatari\TT0622-13C-1.als | Frequency (MHz) | 125.77           | Nucleus | 13C          |
| Number of Transients   | 256      | Original Points Count  | 26214                | Points Count | 26214                                   | Pulse Sequence  | single_pulse_dec | Solvent | CHLOROFORM-D |
| Sweep Width (Hz)       | 31446.06 | Temperature (degree C) | 20.800               |              |                                         |                 |                  |         |              |

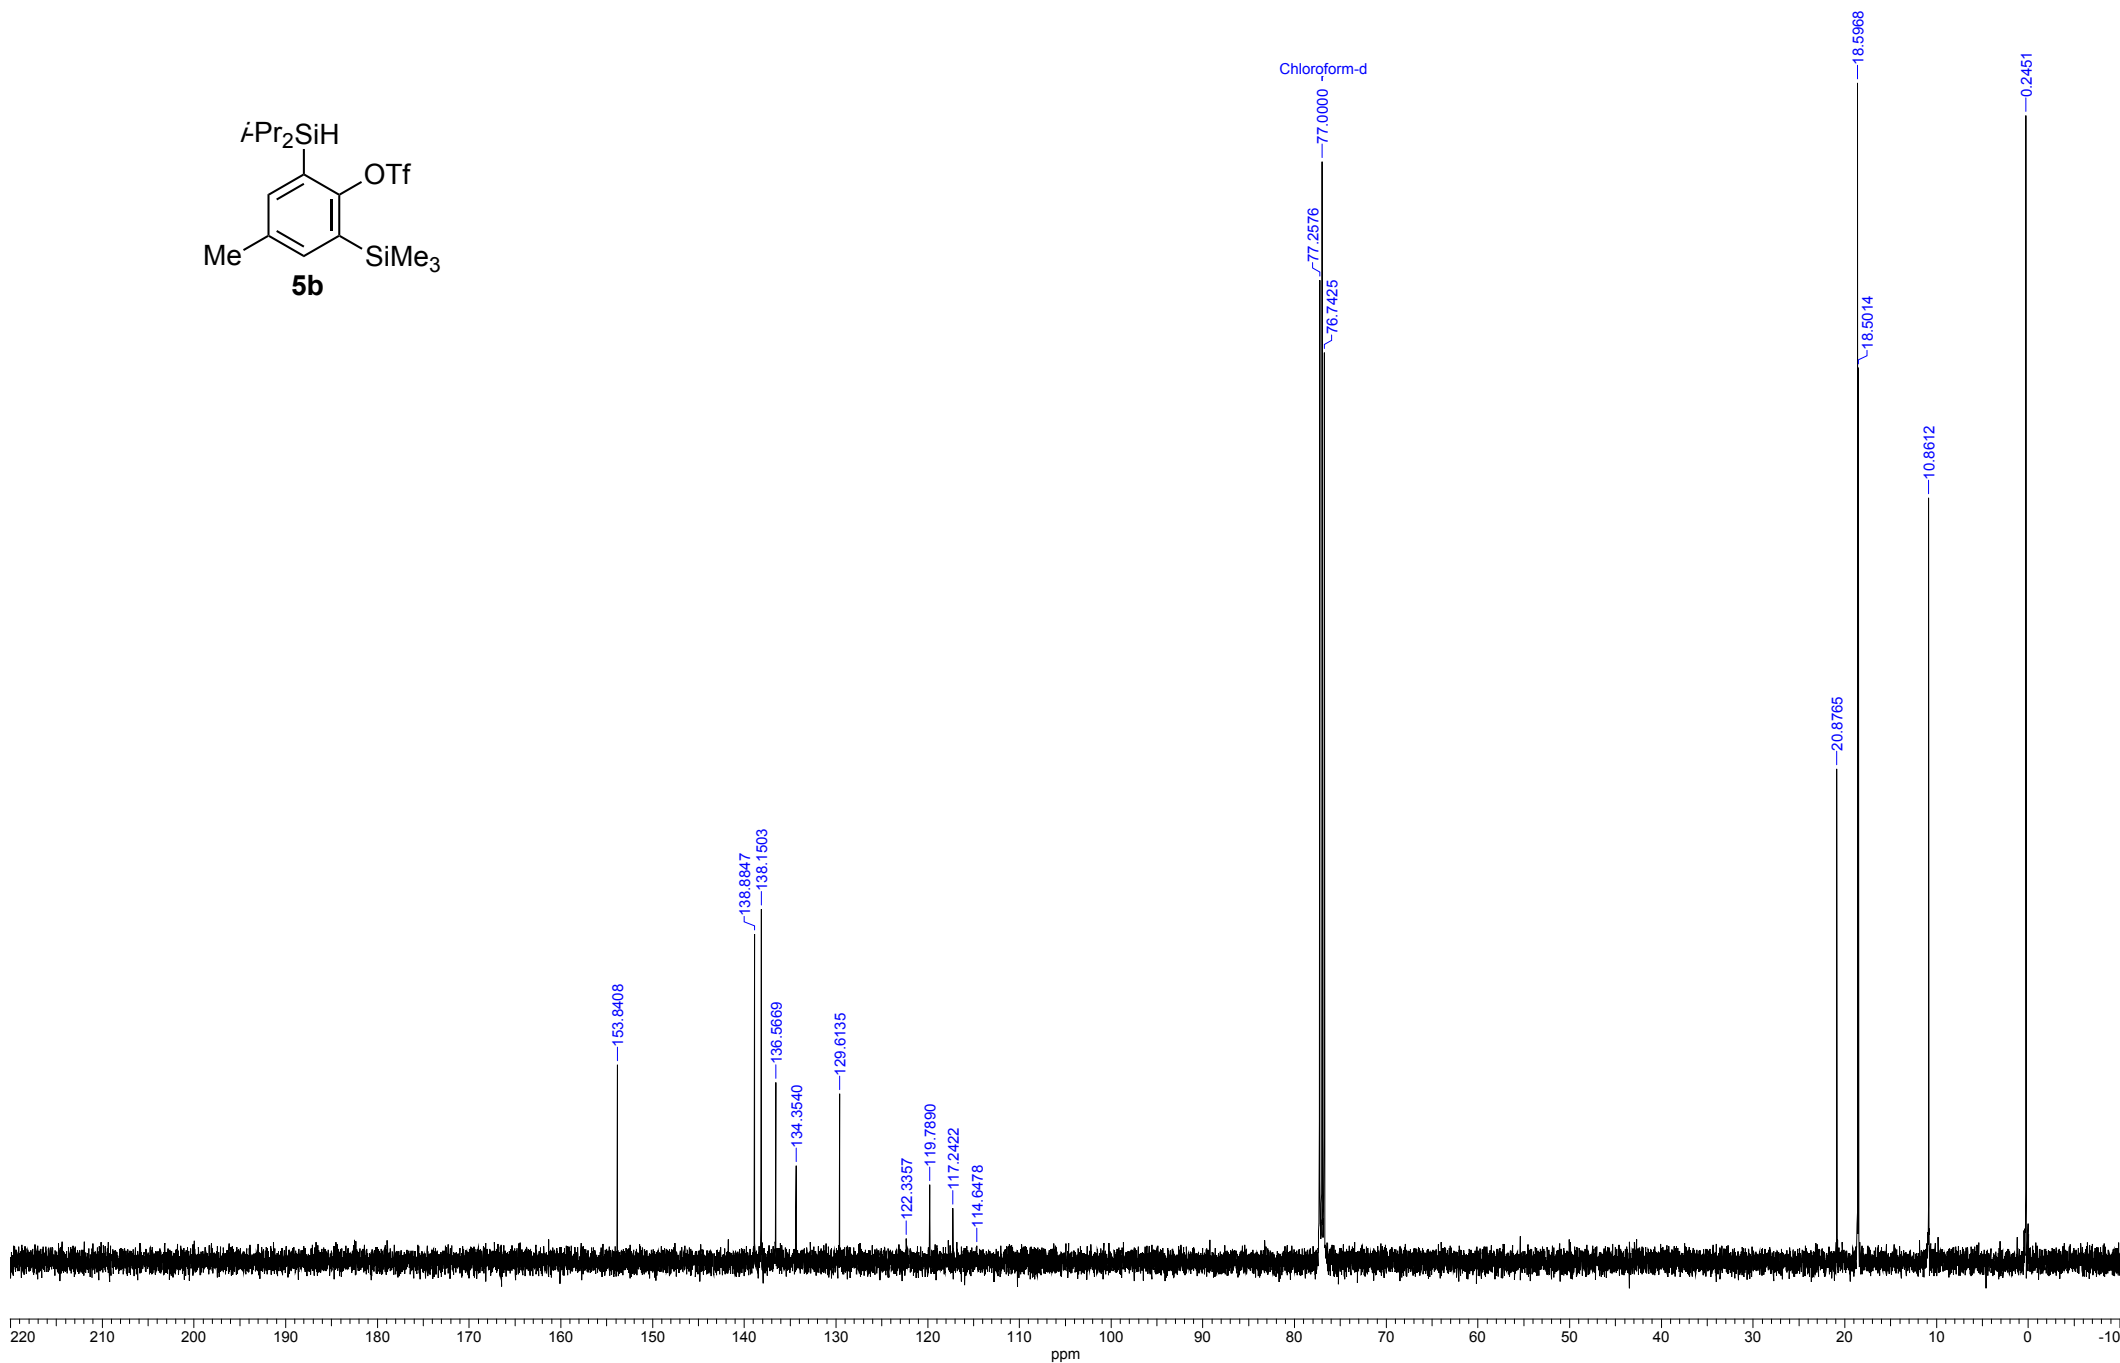

|                        |         |                        |              |                      |                      |                       |                                                        |
|------------------------|---------|------------------------|--------------|----------------------|----------------------|-----------------------|--------------------------------------------------------|
| Acquisition Time (sec) | 1.8153  | Comment                | single_pulse | Date                 | 06 Jan 2021 22:28:36 | File Name             | F:\NMR CE t H \tawarani\T0677-1H-retake_proton-1-1.als |
| Frequency (MHz)        | 600.17  | Nucleus                | 1H           | Number of Transients | 8                    | Original Points Count | 16384                                                  |
| Sweep Width (Hz)       | 9025.27 | Temperature (degree C) | 19.000       | Points Count         | 13120                | Pulse Sequence        | proton.jxp                                             |
|                        |         |                        |              |                      |                      | Solvent               | CHLOROFORM-D                                           |

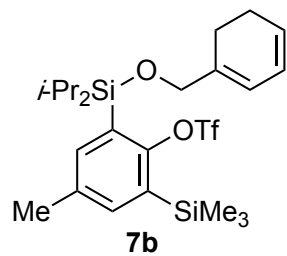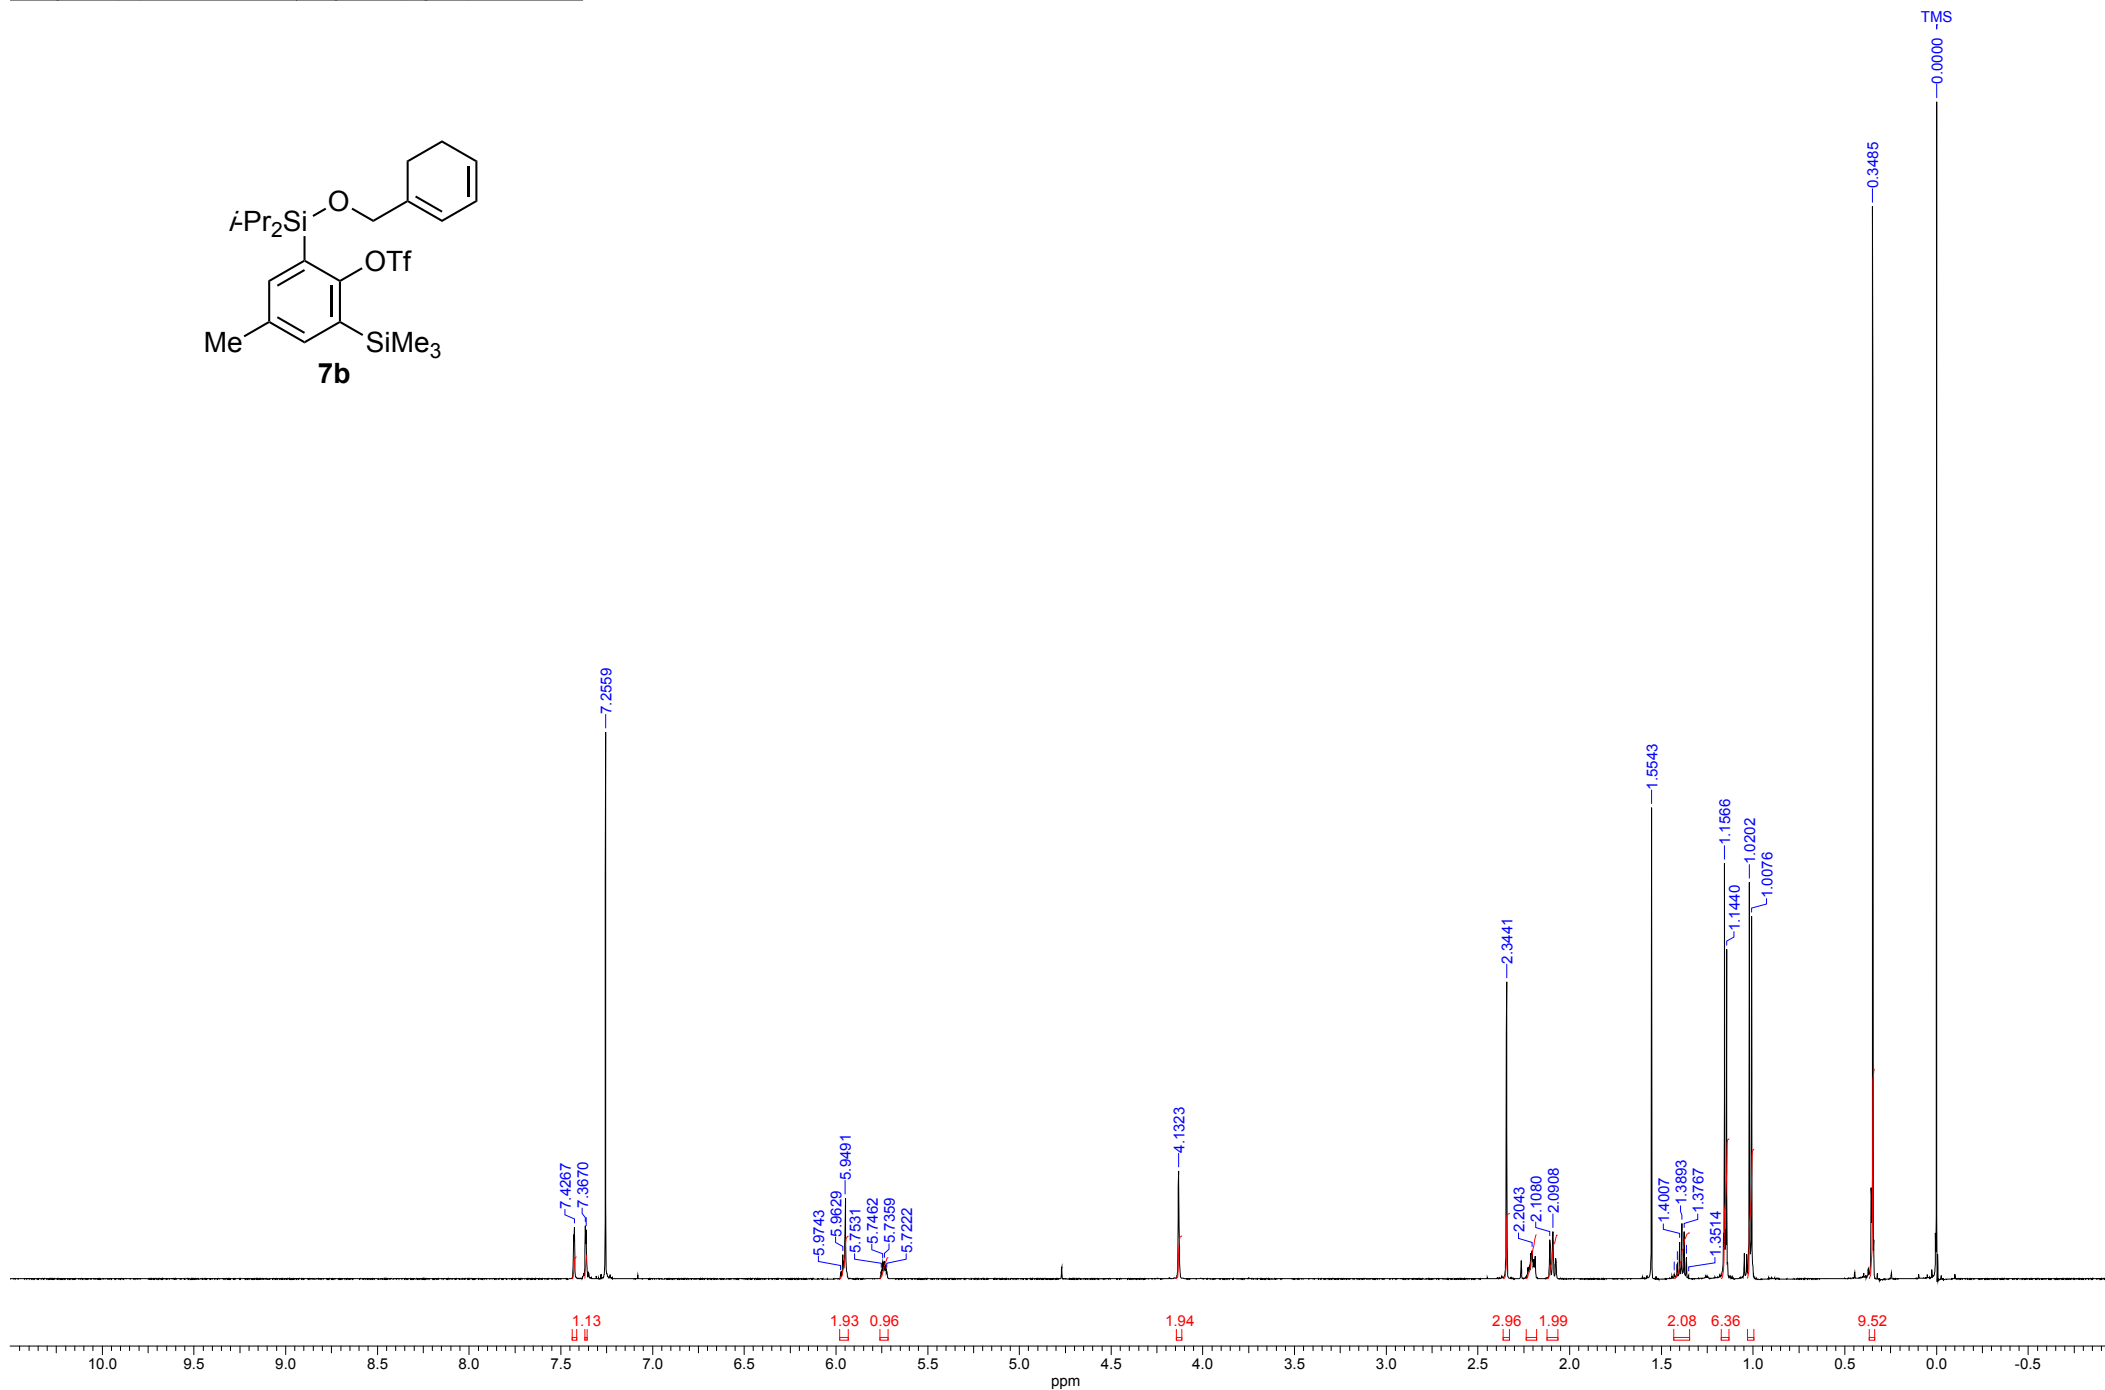

|                        |                                                       |                 |                                  |                      |                      |                        |        |
|------------------------|-------------------------------------------------------|-----------------|----------------------------------|----------------------|----------------------|------------------------|--------|
| Acquisition Time (sec) | 0.6921                                                | Comment         | single pulse decoupled gated NOE | Date                 | 06 Jan 2021 22:28:14 |                        |        |
| File Name              | F:\NMR CE t H \tawatar\TT0677-13C-retake carbon-1.als | Frequency (MHz) | 150.00                           | Number of Transients | 256                  | Original Points Count  | 26214  |
| Pulse Sequence         | carbon cool.jxp                                       | Solvent         | CHLOROFORM-D                     | Sweep Width (Hz)     | 37876.77             | Temperature (degree C) | 19.000 |
|                        |                                                       |                 |                                  |                      |                      | Points Count           | 26214  |

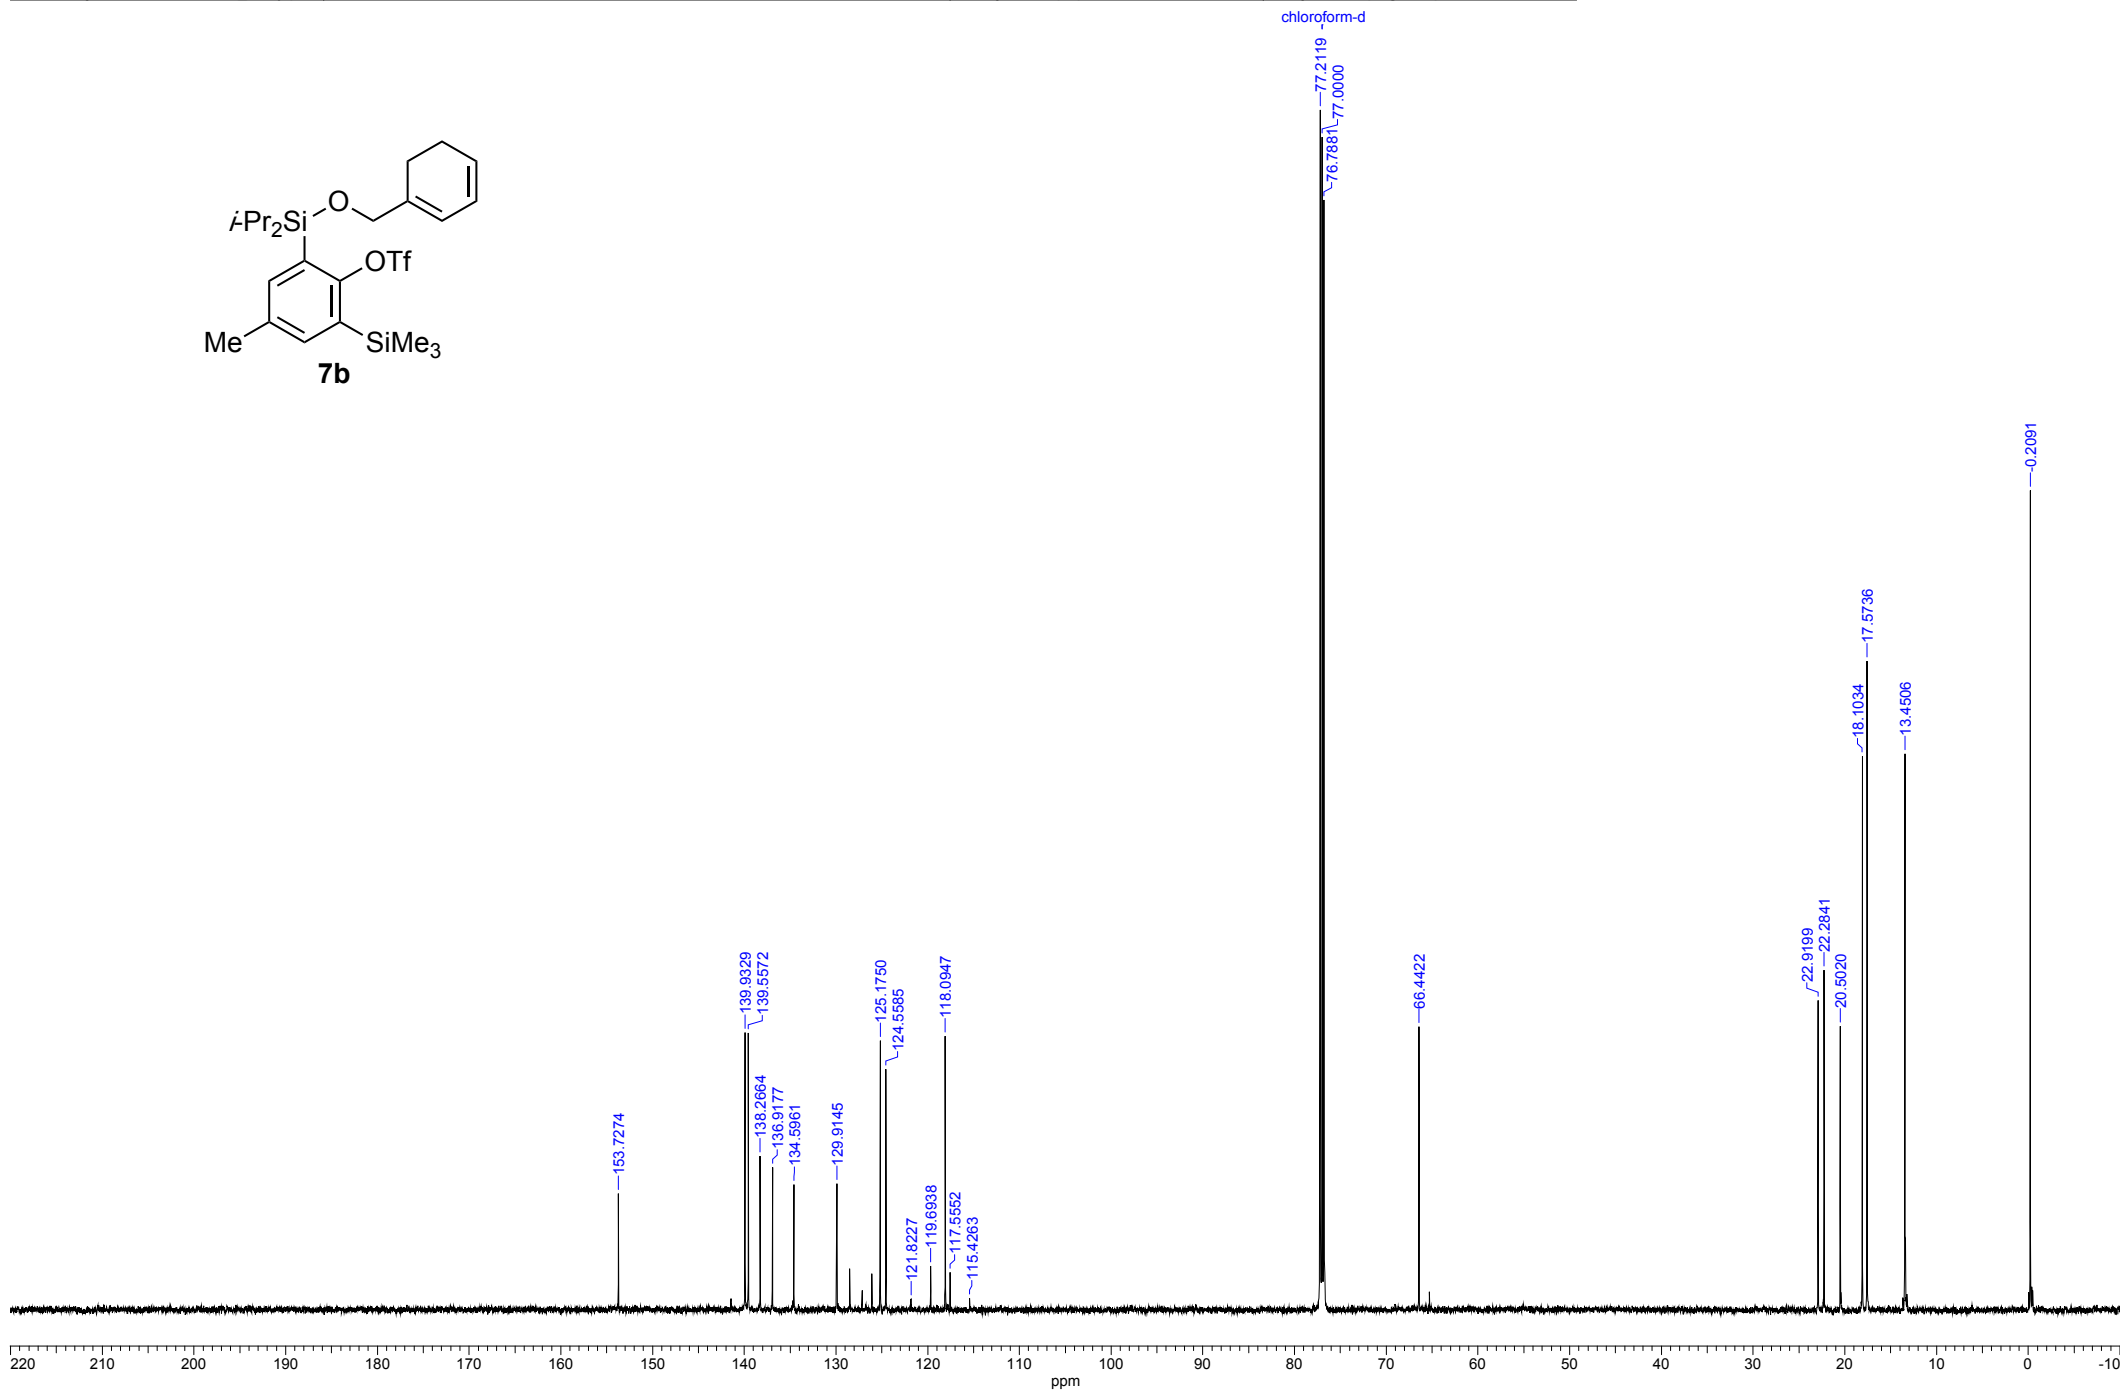

|                        |         |                        |                      |              |                                             |                 |                  |         |              |
|------------------------|---------|------------------------|----------------------|--------------|---------------------------------------------|-----------------|------------------|---------|--------------|
| Acquisition Time (sec) | 3.4918  | Date                   | 03 Mar 2020 15:00:02 | File Name    | F:\NMR CE t H \tawatari\TT0367\column-1.als | Frequency (MHz) | 500.16           | Nucleus | 1H           |
| Number of Transients   | 8       | Original Points Count  | 26214                | Points Count | 26214                                       | Pulse Sequence  | single_pulse.ex2 | Solvent | CHLOROFORM-D |
| Sweep Width (Hz)       | 7507.39 | Temperature (degree C) | 19.700               |              |                                             |                 |                  |         |              |

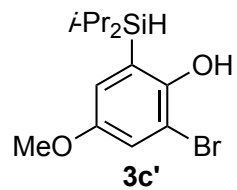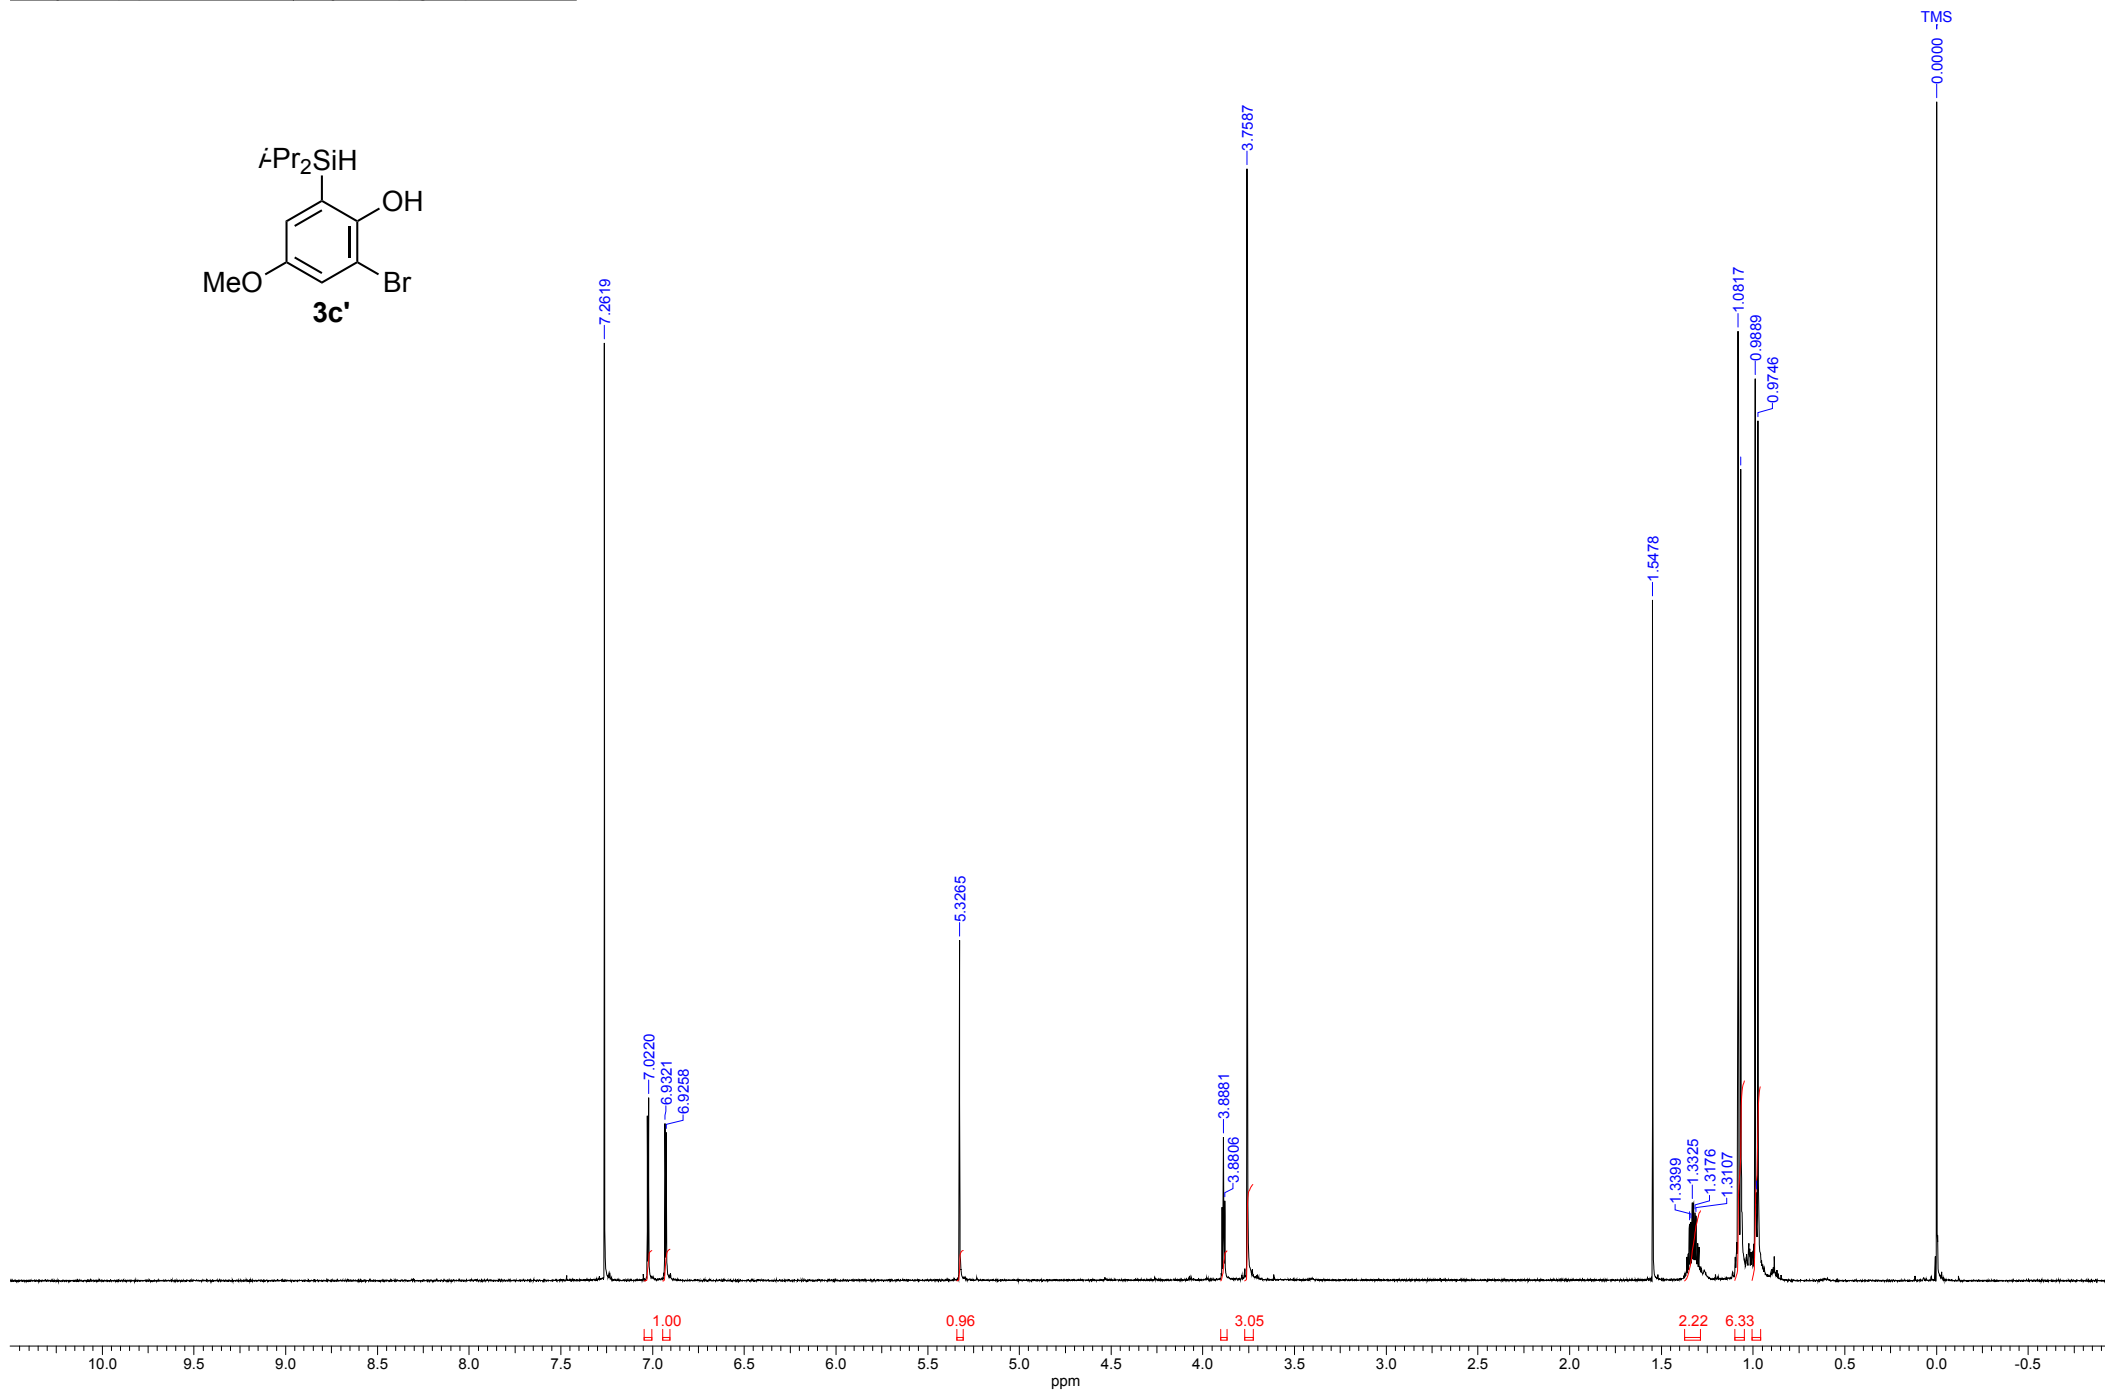



|                        |          |                        |                      |              |                                        |                 |                  |         |              |
|------------------------|----------|------------------------|----------------------|--------------|----------------------------------------|-----------------|------------------|---------|--------------|
| Acquisition Time (sec) | 0.8336   | Date                   | 03 Mar 2020 15:03:30 | File Name    | F:\NMR_CE_t_H\tawatar\TT0367-13C-1.als | Frequency (MHz) | 125.77           | Nucleus | 13C          |
| Number of Transients   | 256      | Original Points Count  | 26214                | Points Count | 26214                                  | Pulse Sequence  | single_pulse_dec | Solvent | CHLOROFORM-D |
| Sweep Width (Hz)       | 31446.06 | Temperature (degree C) | 20.000               |              |                                        |                 |                  |         |              |

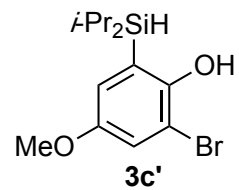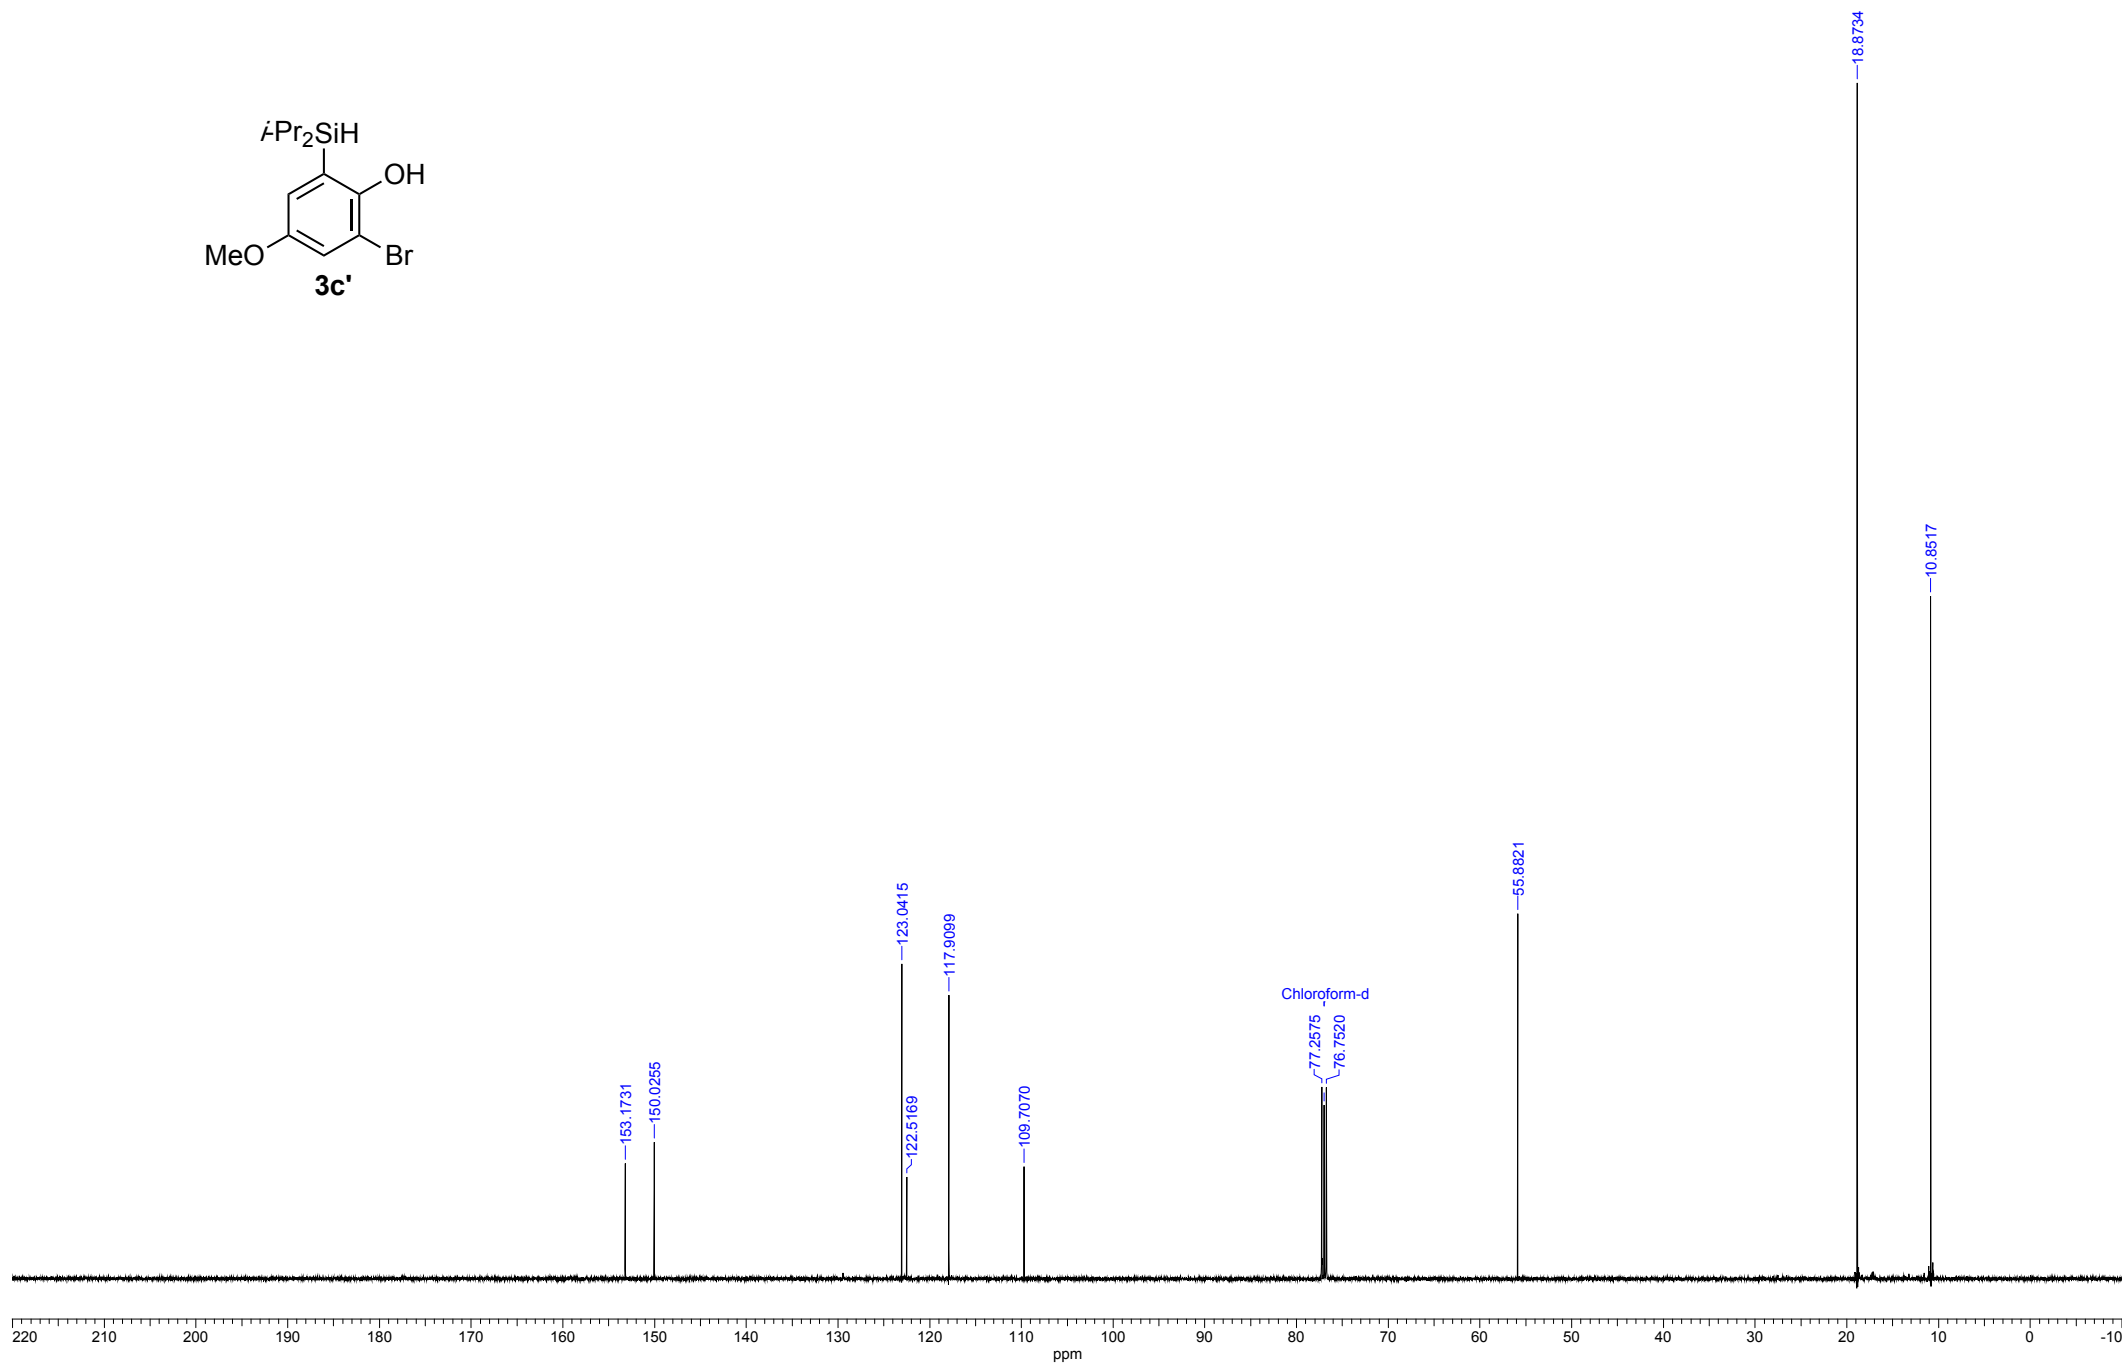

|                        |         |                        |                      |              |                                                |                 |                  |         |              |
|------------------------|---------|------------------------|----------------------|--------------|------------------------------------------------|-----------------|------------------|---------|--------------|
| Acquisition Time (sec) | 3.4918  | Date                   | 02 Mar 2020 23:13:08 | File Name    | F:\NMR_CE t H \tawatari\TT0375-1H-retake-1.als | Frequency (MHz) | 500.16           | Nucleus | 1H           |
| Number of Transients   | 8       | Original Points Count  | 26214                | Points Count | 26214                                          | Pulse Sequence  | single_pulse.ex2 | Solvent | CHLOROFORM-D |
| Sweep Width (Hz)       | 7507.39 | Temperature (degree C) | 19.400               |              |                                                |                 |                  |         |              |

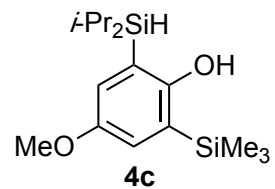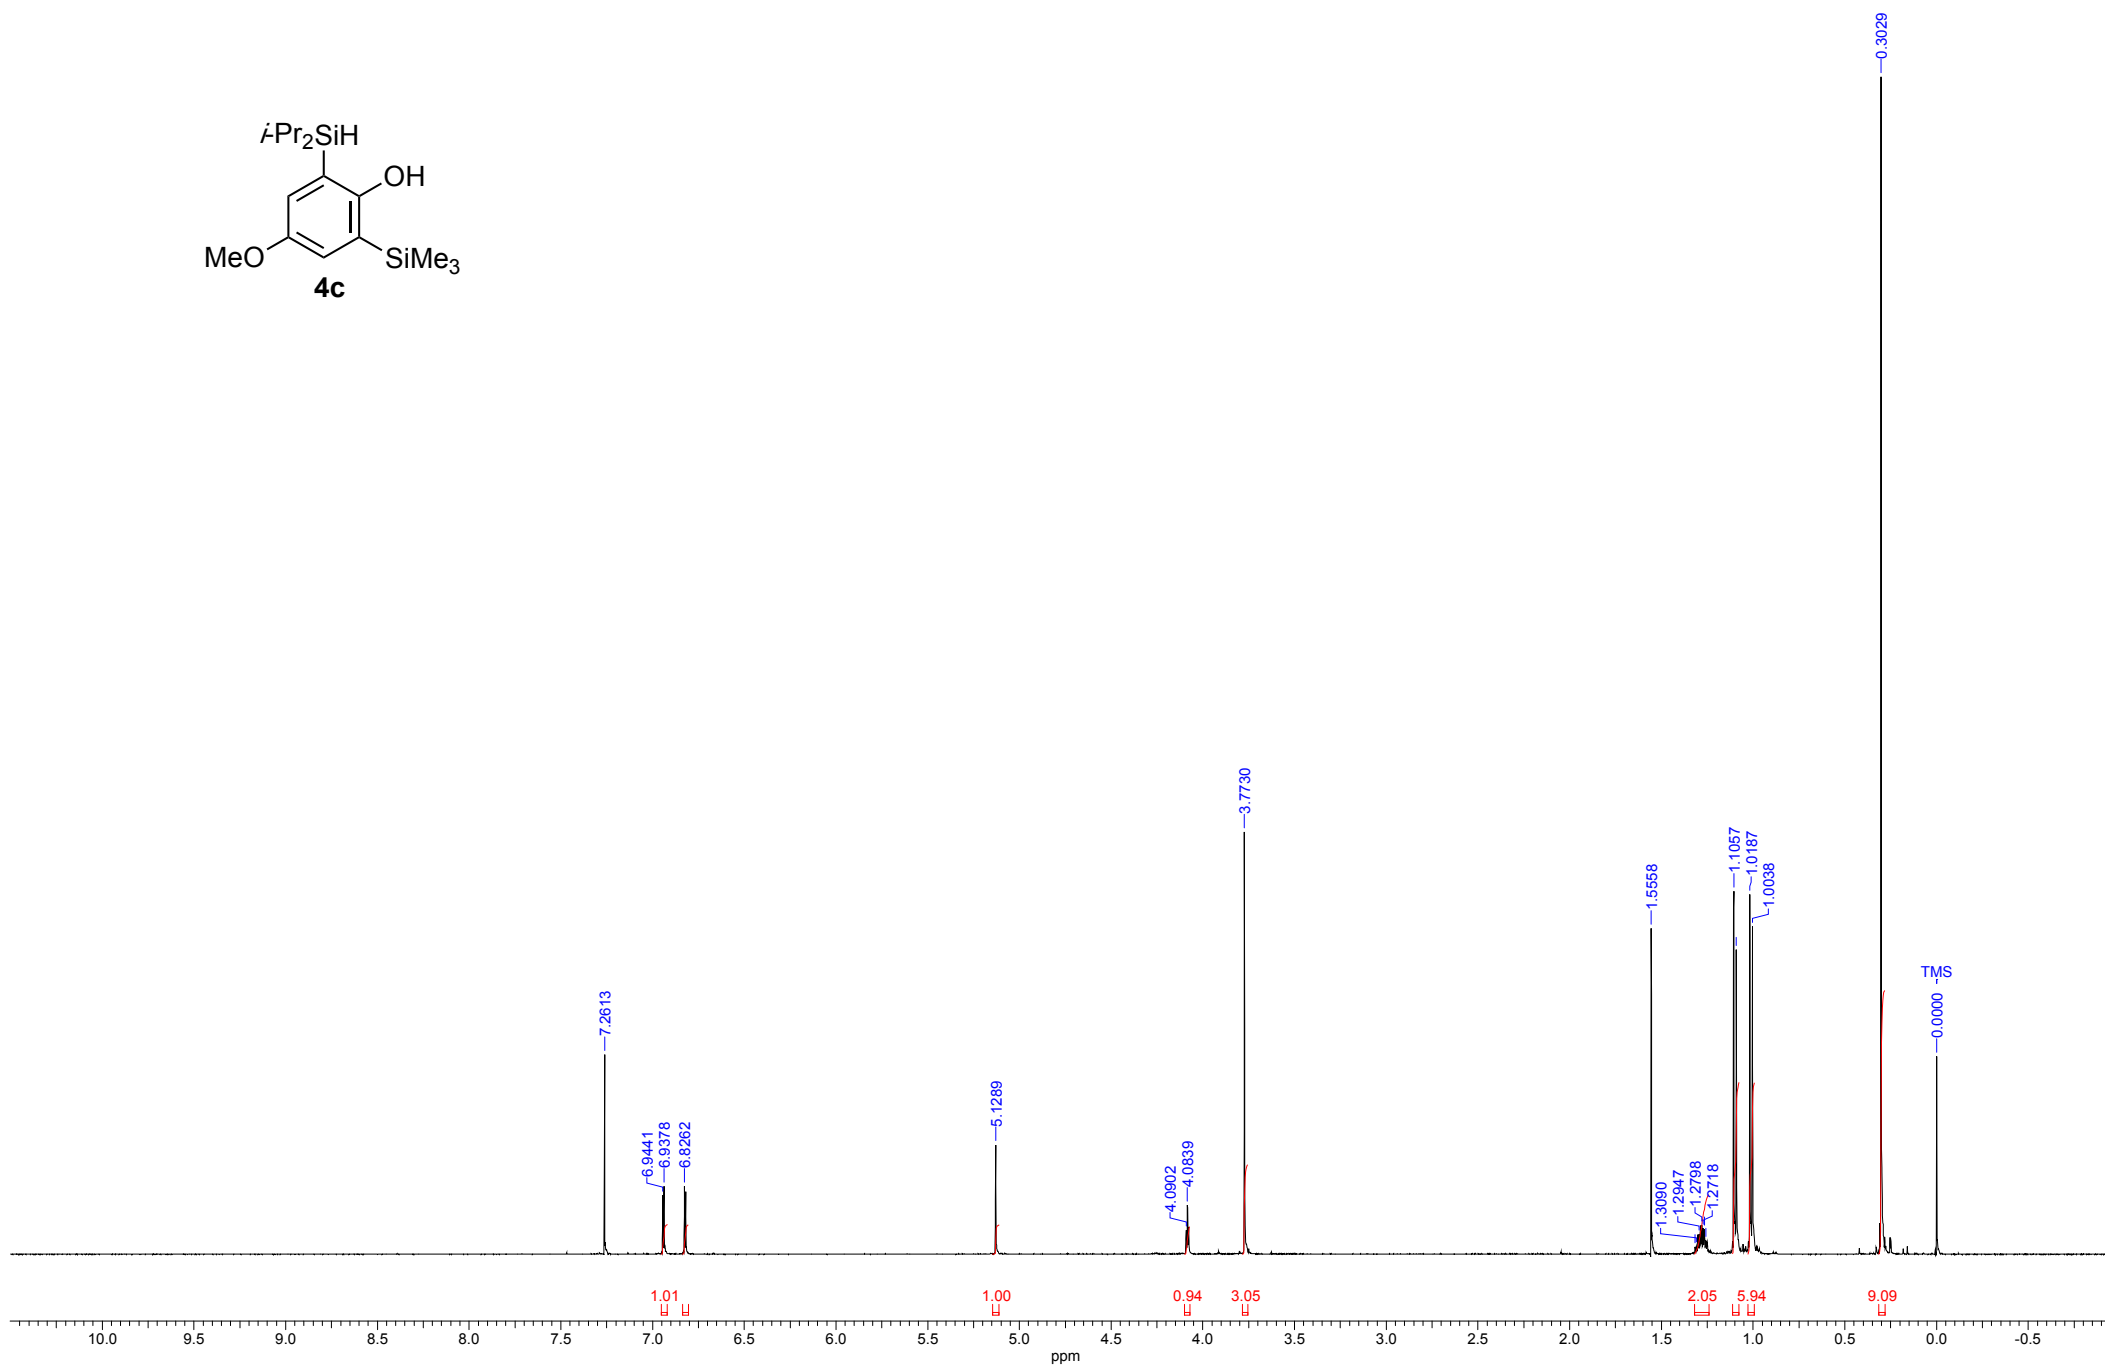

|                        |          |                        |                      |              |                                        |                 |                  |         |              |
|------------------------|----------|------------------------|----------------------|--------------|----------------------------------------|-----------------|------------------|---------|--------------|
| Acquisition Time (sec) | 0.8336   | Date                   | 02 Mar 2020 23:16:54 | File Name    | F:\NMR_CE_t_H\tawatar\TT0375-13C-1.als | Frequency (MHz) | 125.77           | Nucleus | 13C          |
| Number of Transients   | 128      | Original Points Count  | 26214                | Points Count | 26214                                  | Pulse Sequence  | single_pulse_dec | Solvent | CHLOROFORM-D |
| Sweep Width (Hz)       | 31446.06 | Temperature (degree C) | 20.500               |              |                                        |                 |                  |         |              |

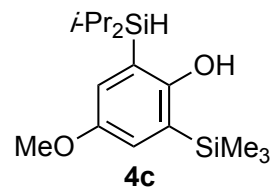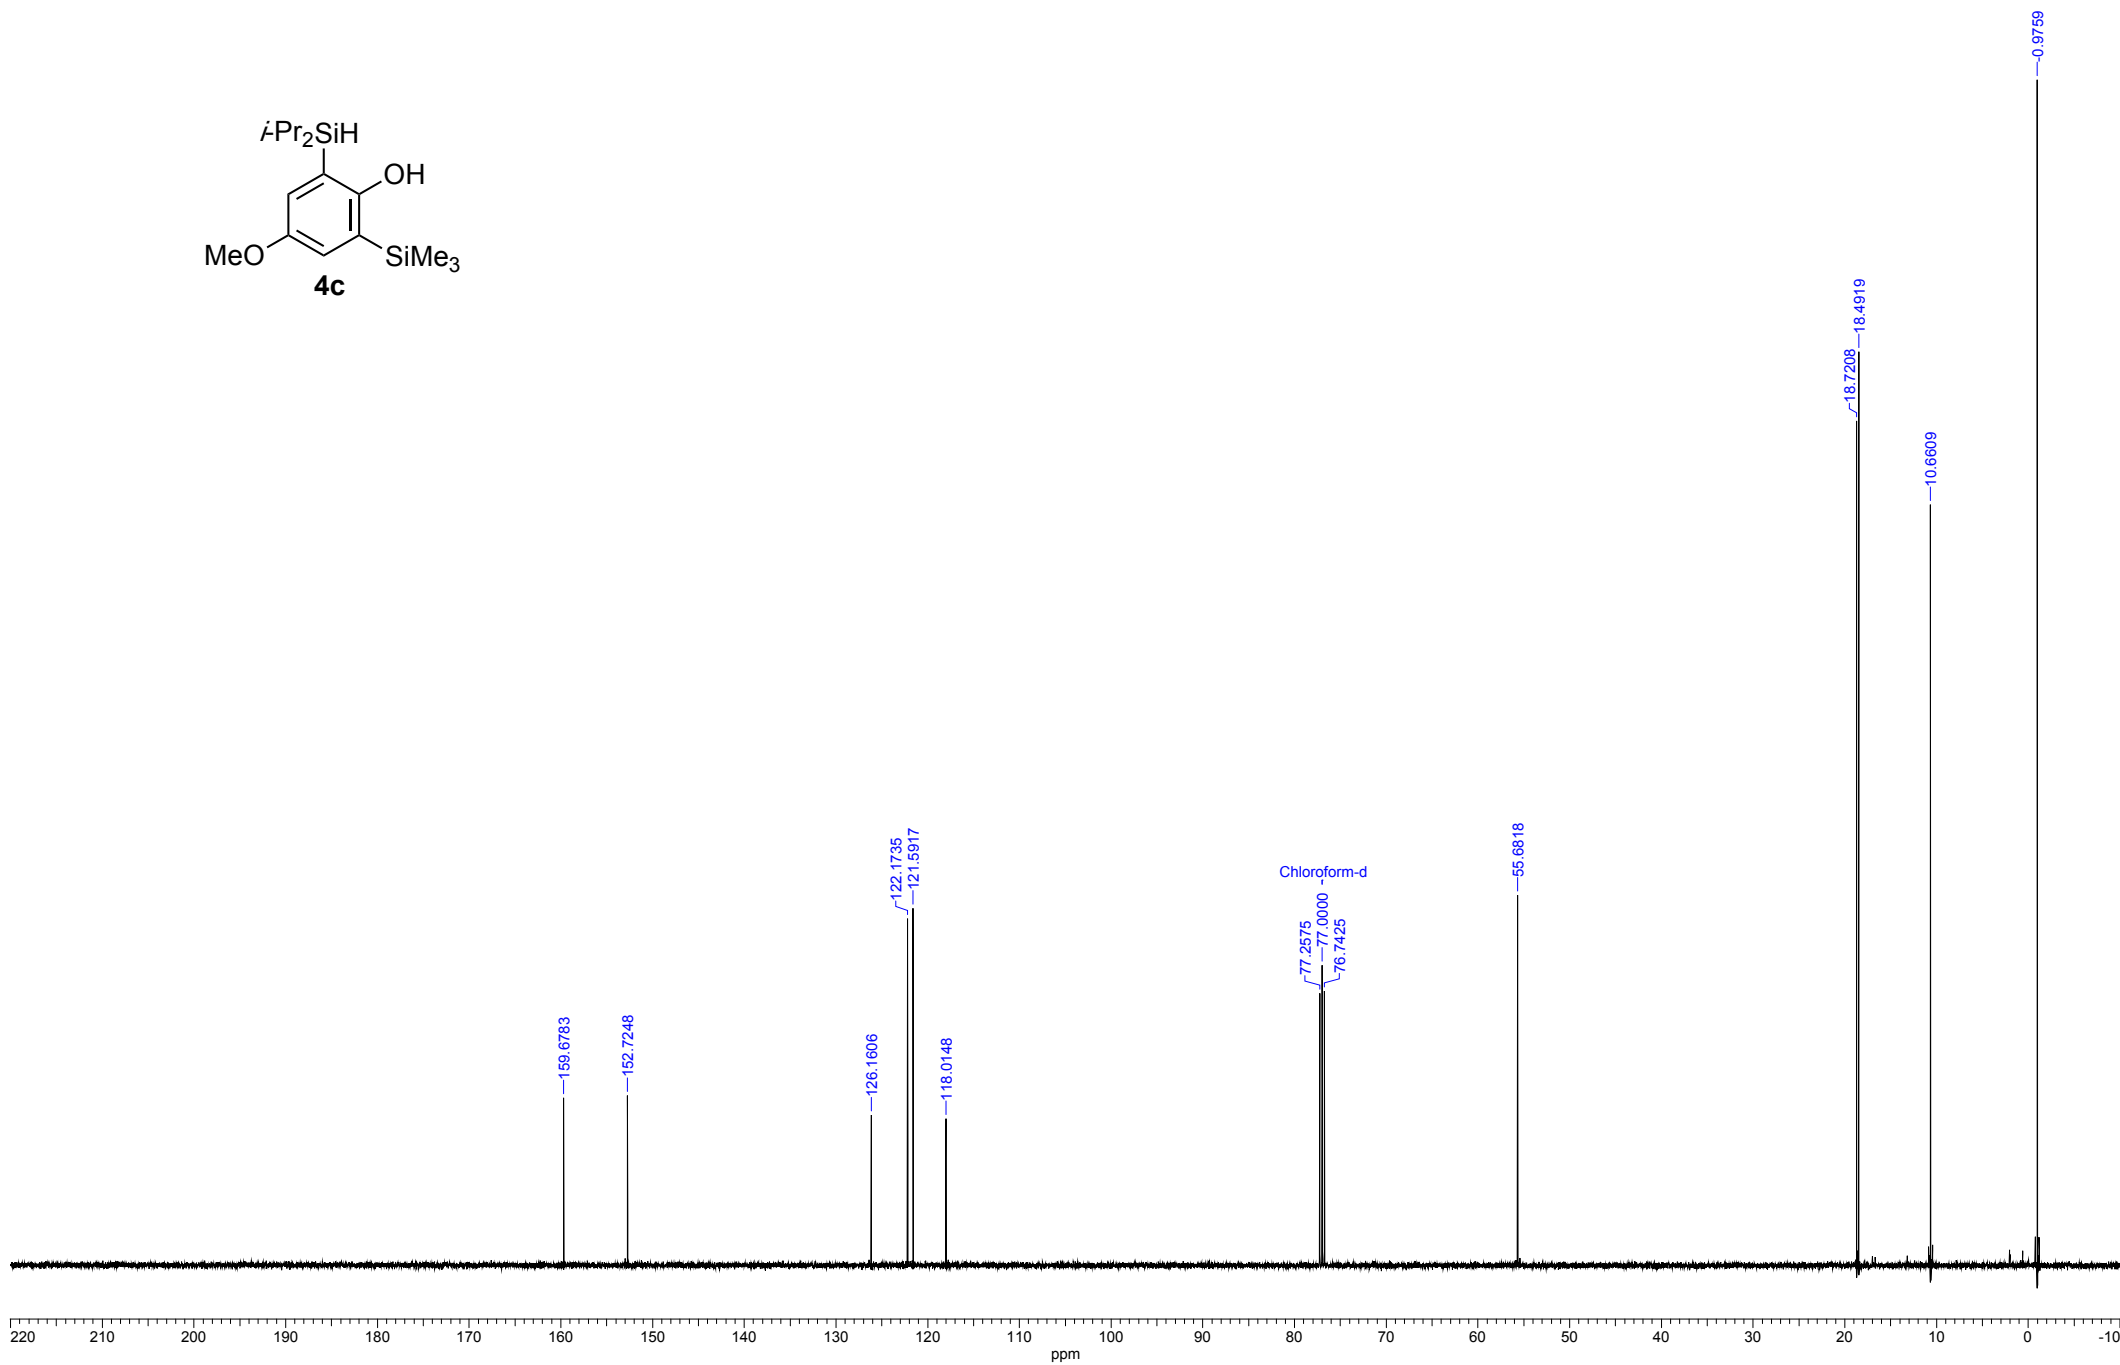

|                        |         |                        |                      |              |                                           |                 |                  |         |              |
|------------------------|---------|------------------------|----------------------|--------------|-------------------------------------------|-----------------|------------------|---------|--------------|
| Acquisition Time (sec) | 3.4918  | Date                   | 16 Jan 2020 17:56:14 | File Name    | F:\NMR CE t H \tawatari\TT0316ptlc1-1.als | Frequency (MHz) | 500.16           | Nucleus | 1H           |
| Number of Transients   | 8       | Original Points Count  | 26214                | Points Count | 26214                                     | Pulse Sequence  | single_pulse.ex2 | Solvent | CHLOROFORM-D |
| Sweep Width (Hz)       | 7507.39 | Temperature (degree C) | 19.500               |              |                                           |                 |                  |         |              |

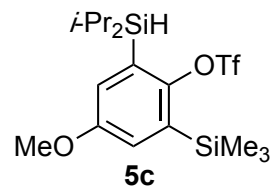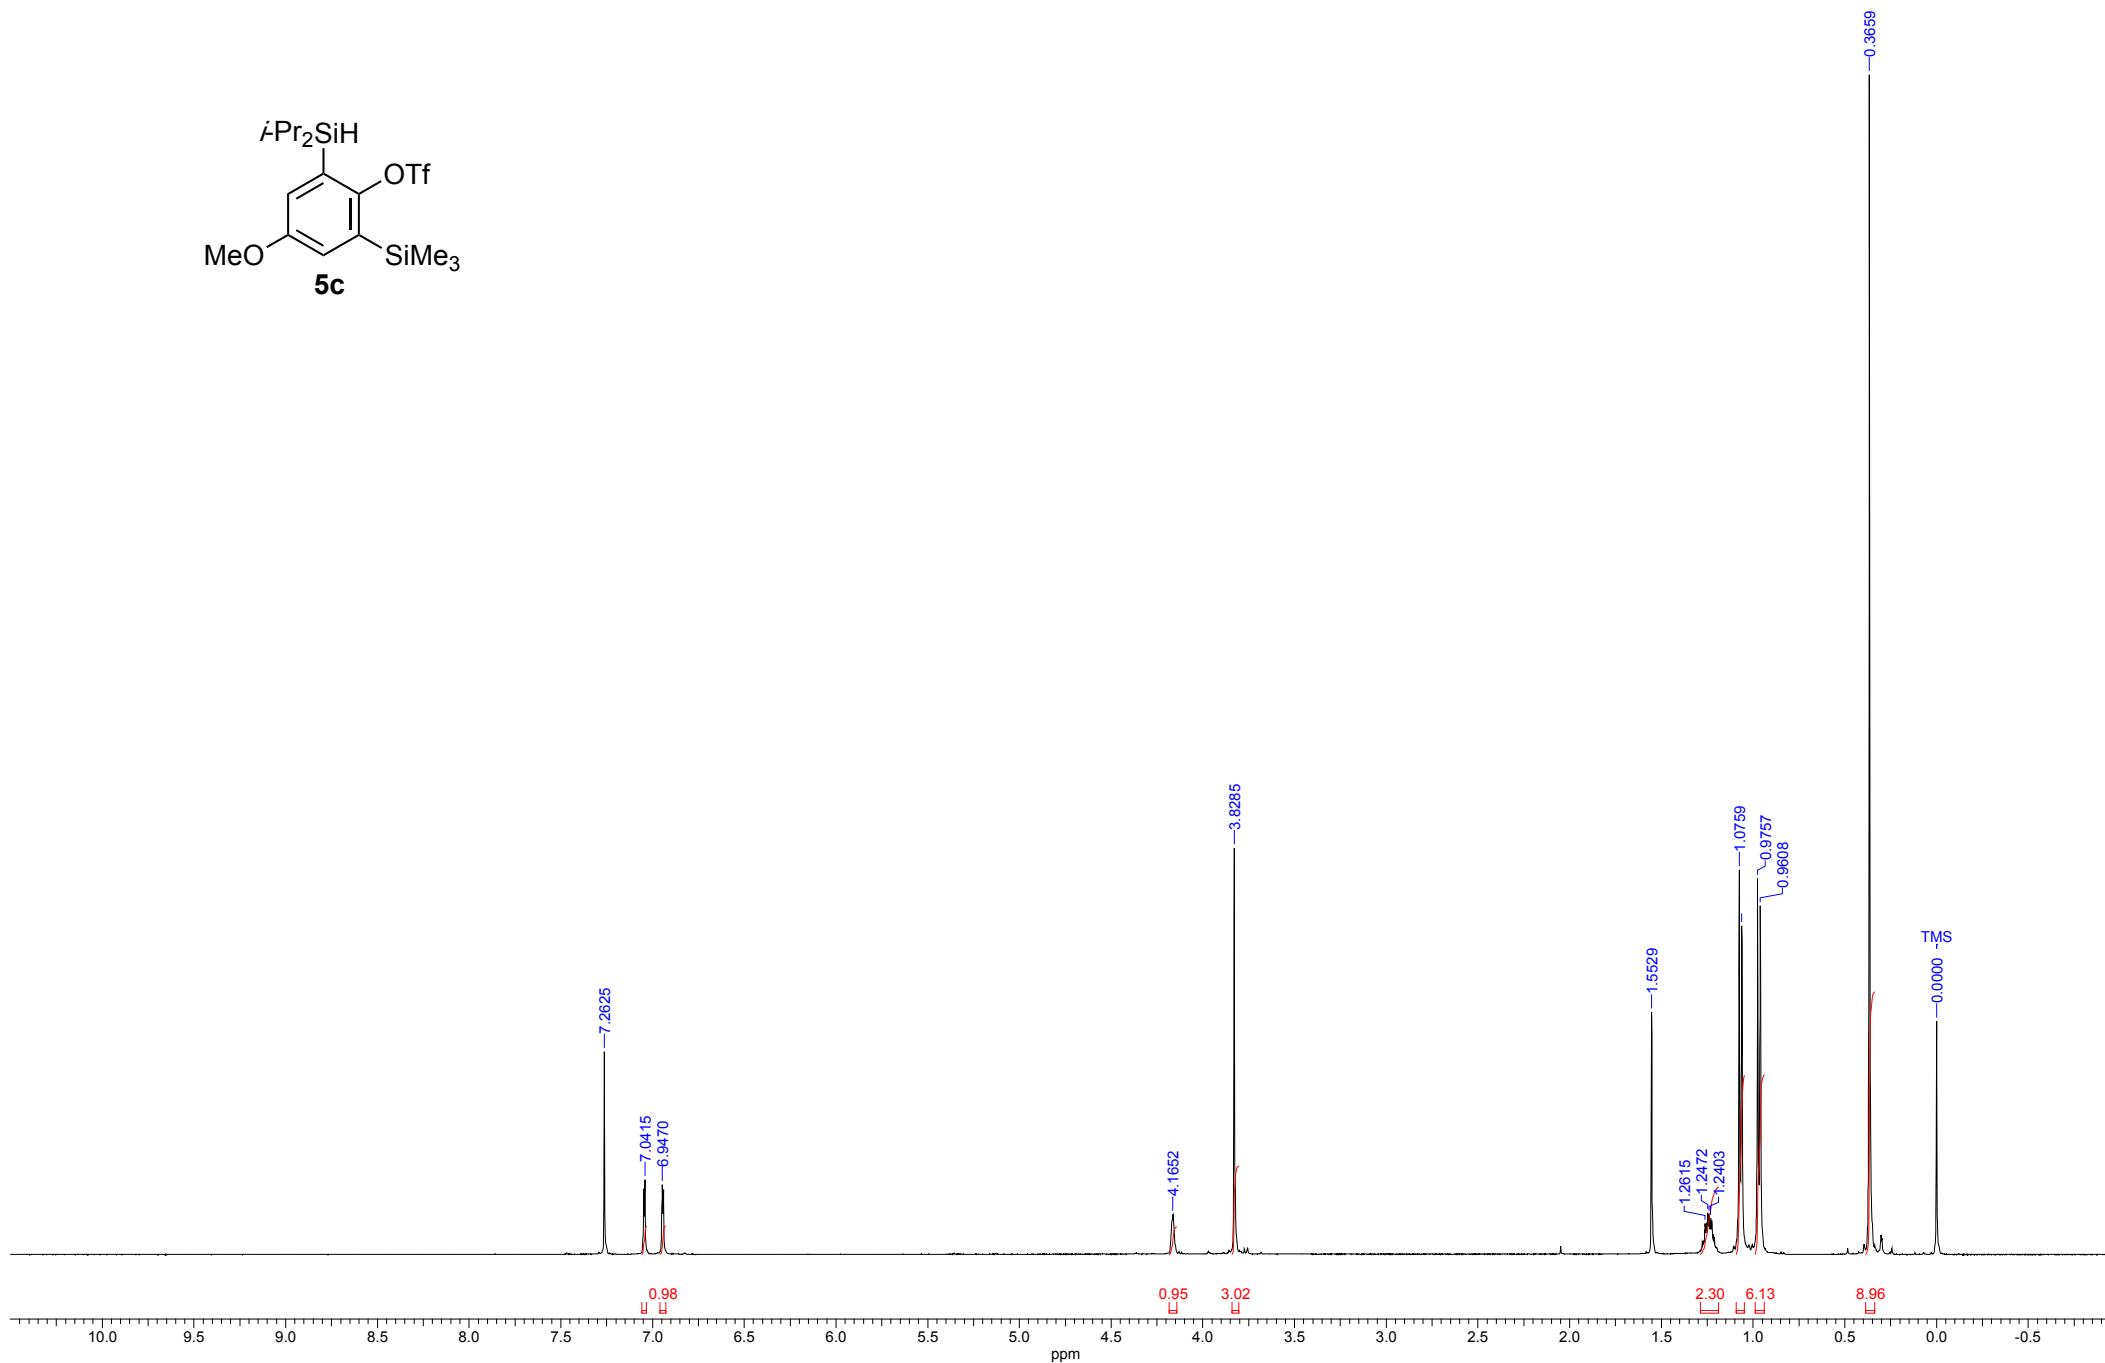

|                        |          |                        |                      |              |                                         |                 |                  |         |              |
|------------------------|----------|------------------------|----------------------|--------------|-----------------------------------------|-----------------|------------------|---------|--------------|
| Acquisition Time (sec) | 0.8336   | Date                   | 16 Jan 2020 22:03:18 | File Name    | F:\NMR CE t H \tawatar\TT0316-13C-1.als | Frequency (MHz) | 125.77           | Nucleus | 13C          |
| Number of Transients   | 256      | Original Points Count  | 26214                | Points Count | 26214                                   | Pulse Sequence  | single_pulse_dec | Solvent | CHLOROFORM-D |
| Sweep Width (Hz)       | 31446.06 | Temperature (degree C) | 20.000               |              |                                         |                 |                  |         |              |

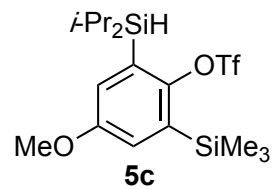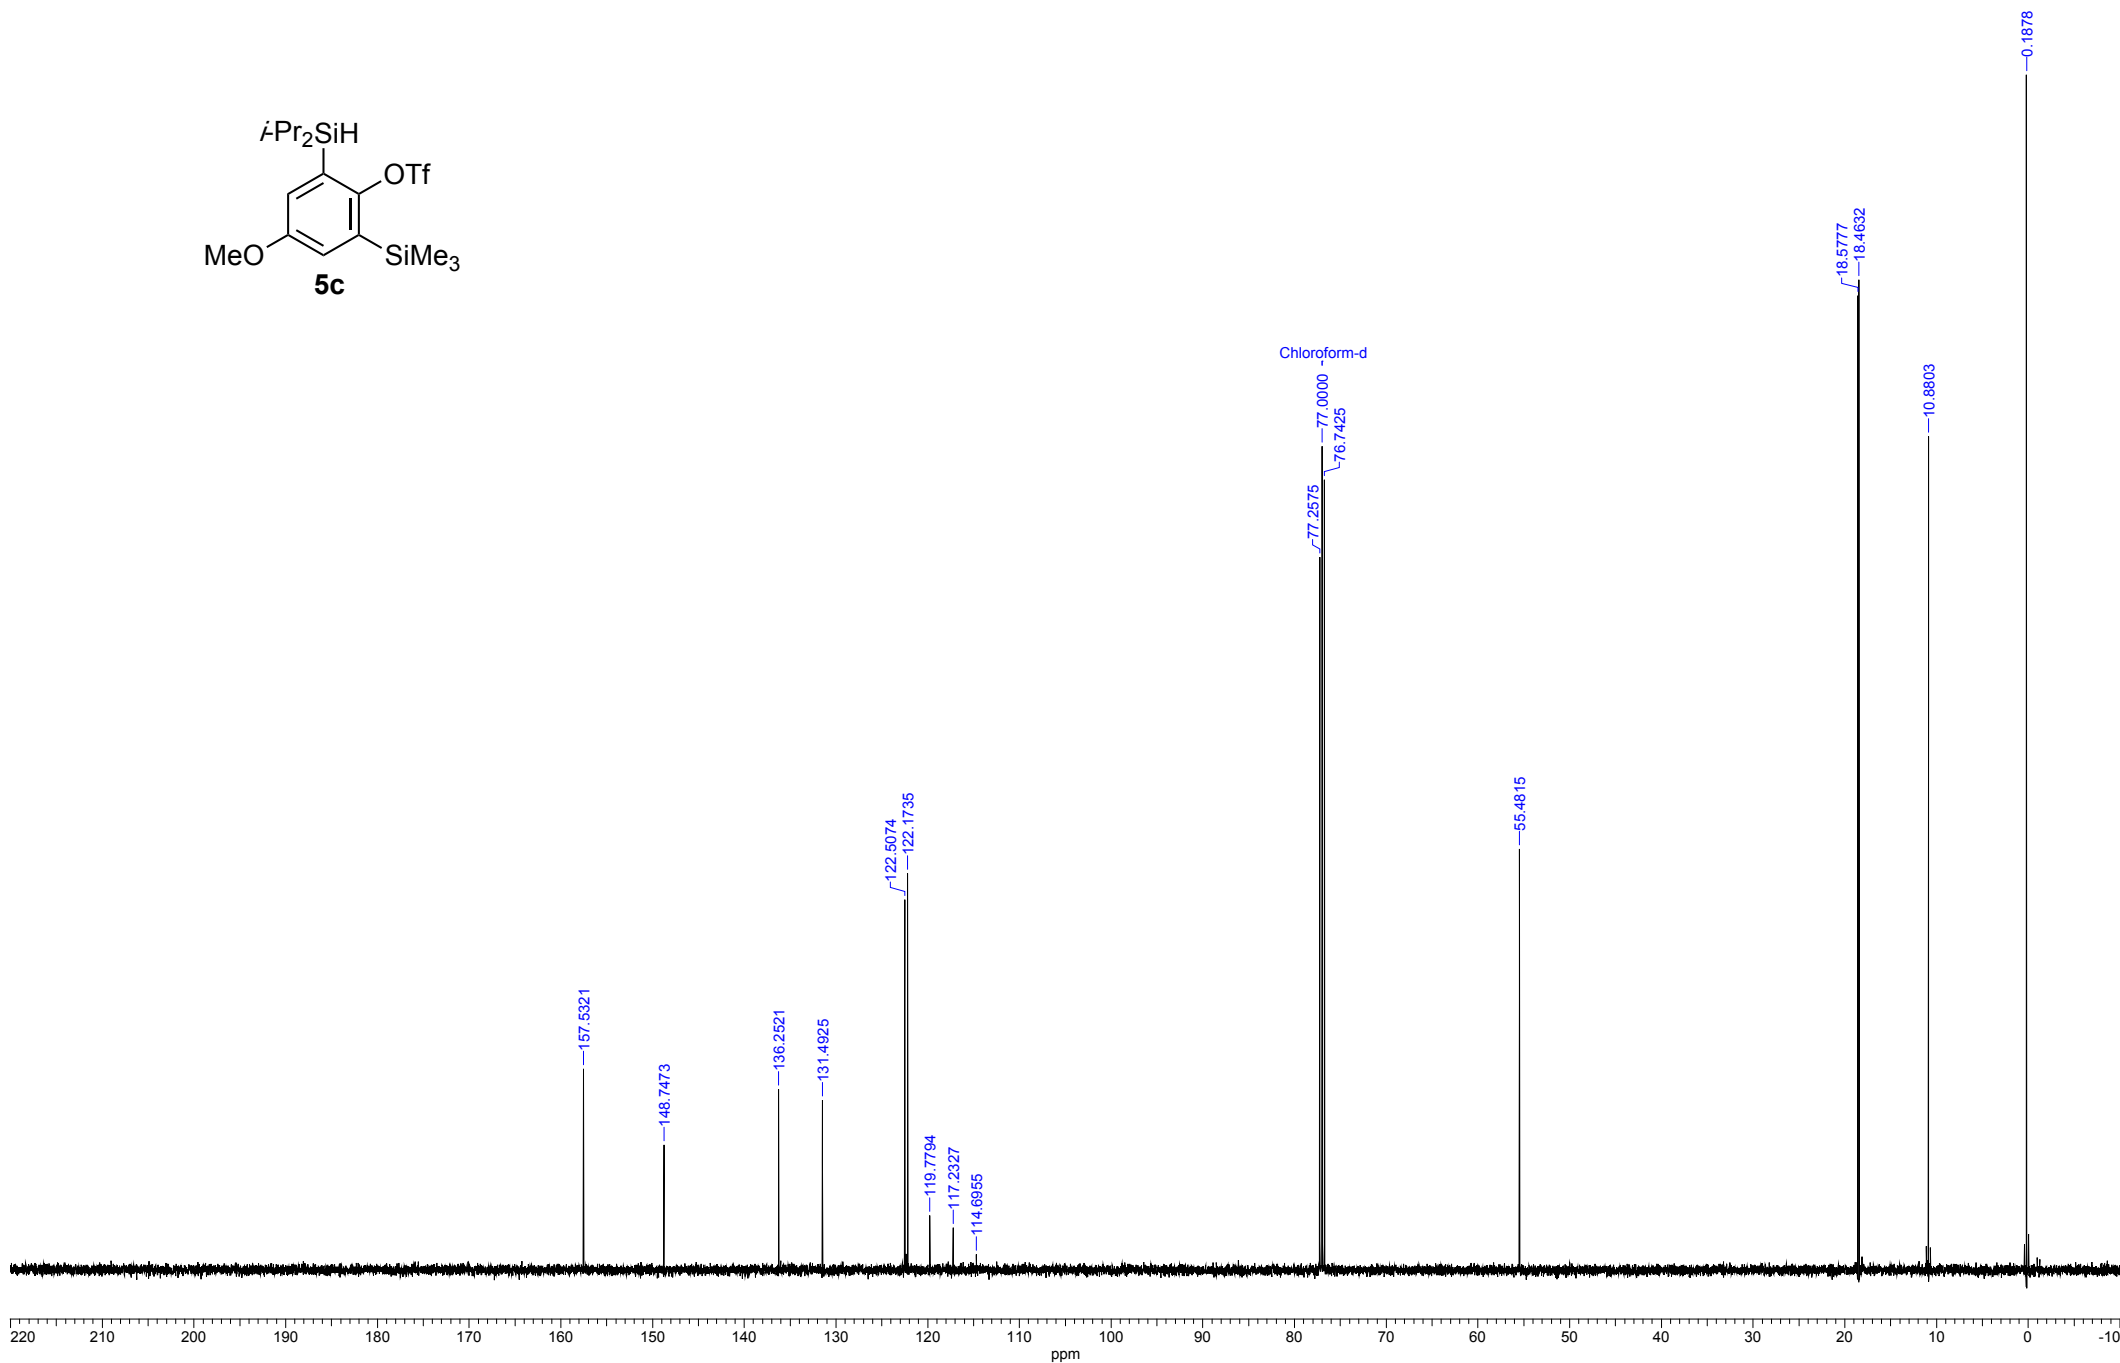

|                        |         |                        |              |                      |                      |                       |                                                  |              |
|------------------------|---------|------------------------|--------------|----------------------|----------------------|-----------------------|--------------------------------------------------|--------------|
| Acquisition Time (sec) | 1.8153  | Comment                | single pulse | Date                 | 04 Dec 2020 21:33:42 | File Name             | F:\NMR CE t H \tawatari\TT0581-1H_proton-1-1.als |              |
| Frequency (MHz)        | 600.17  | Nucleus                | 1H           | Number of Transients | 8                    | Original Points Count | 16384                                            |              |
| Sweep Width (Hz)       | 9025.27 | Temperature (degree C) | 20.500       | Points Count         | 13120                | Pulse Sequence        | proton.jxp                                       |              |
|                        |         |                        |              |                      |                      |                       | Solvent                                          | CHLOROFORM-D |

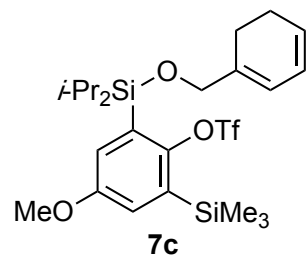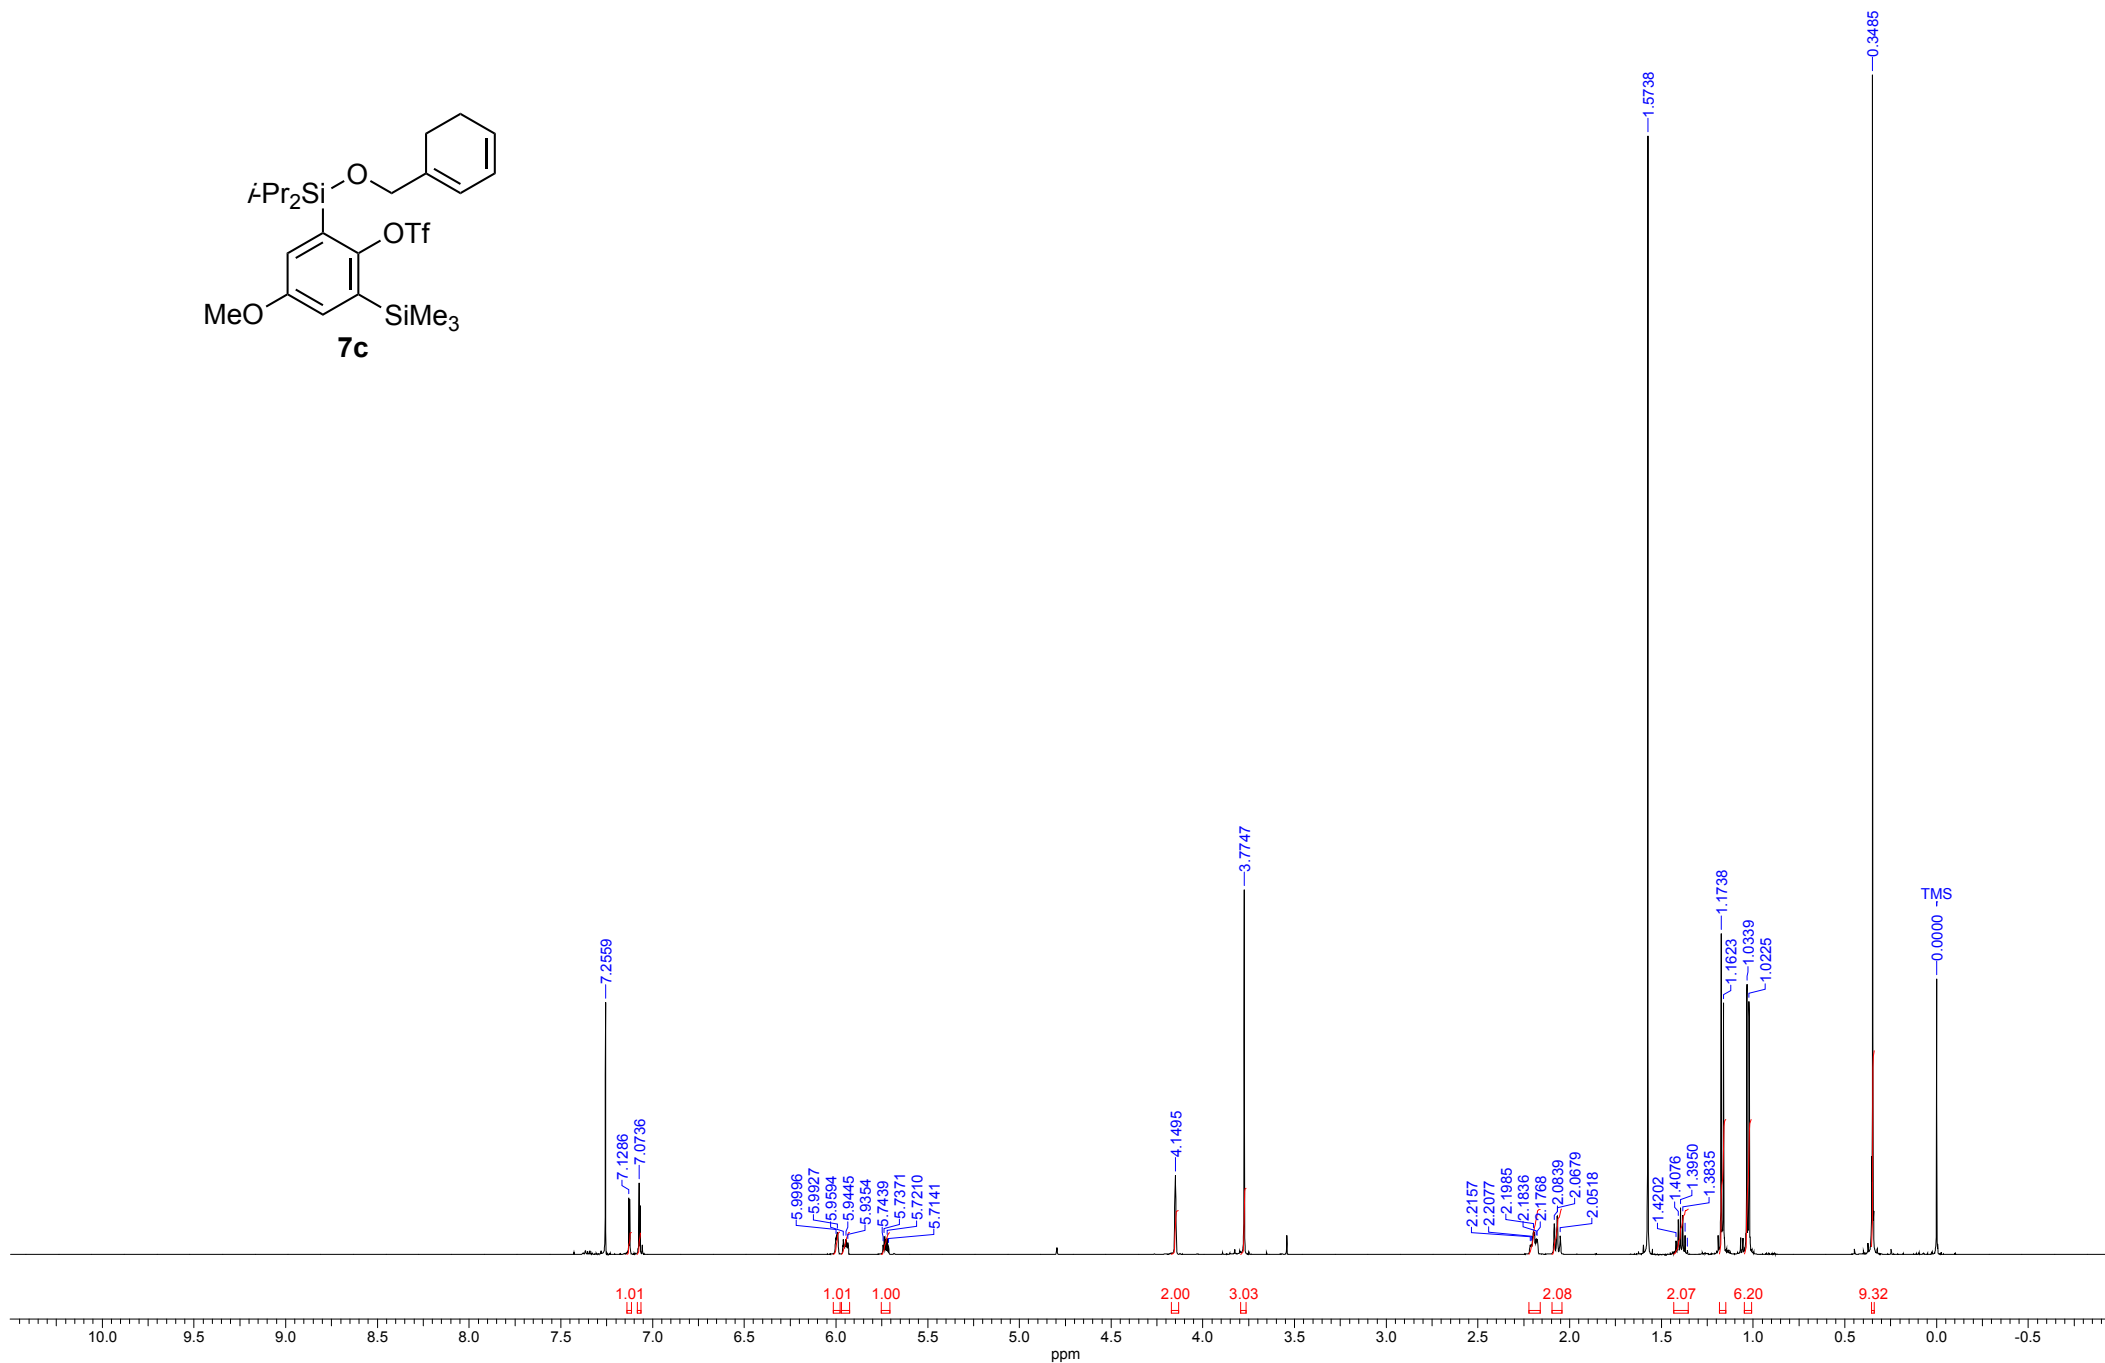

|                        |          |                        |                                  |                       |                      |              |                                                |
|------------------------|----------|------------------------|----------------------------------|-----------------------|----------------------|--------------|------------------------------------------------|
| Acquisition Time (sec) | 0.6921   | Comment                | single pulse decoupled gated NOE | Date                  | 04 Dec 2020 21:39:44 | File Name    | F:\NMR_CE_t_H\tawatari\TT0581-13C carbon-1.als |
| Frequency (MHz)        | 150.00   | Number of Transients   | 257                              | Original Points Count | 26214                | Points Count | 26214                                          |
| Sweep Width (Hz)       | 37876.77 | Temperature (degree C) | 20.600                           | Pulse Sequence        | carbon_cool.jxp      | Solvent      | CHLOROFORM-D                                   |

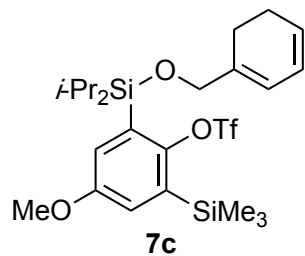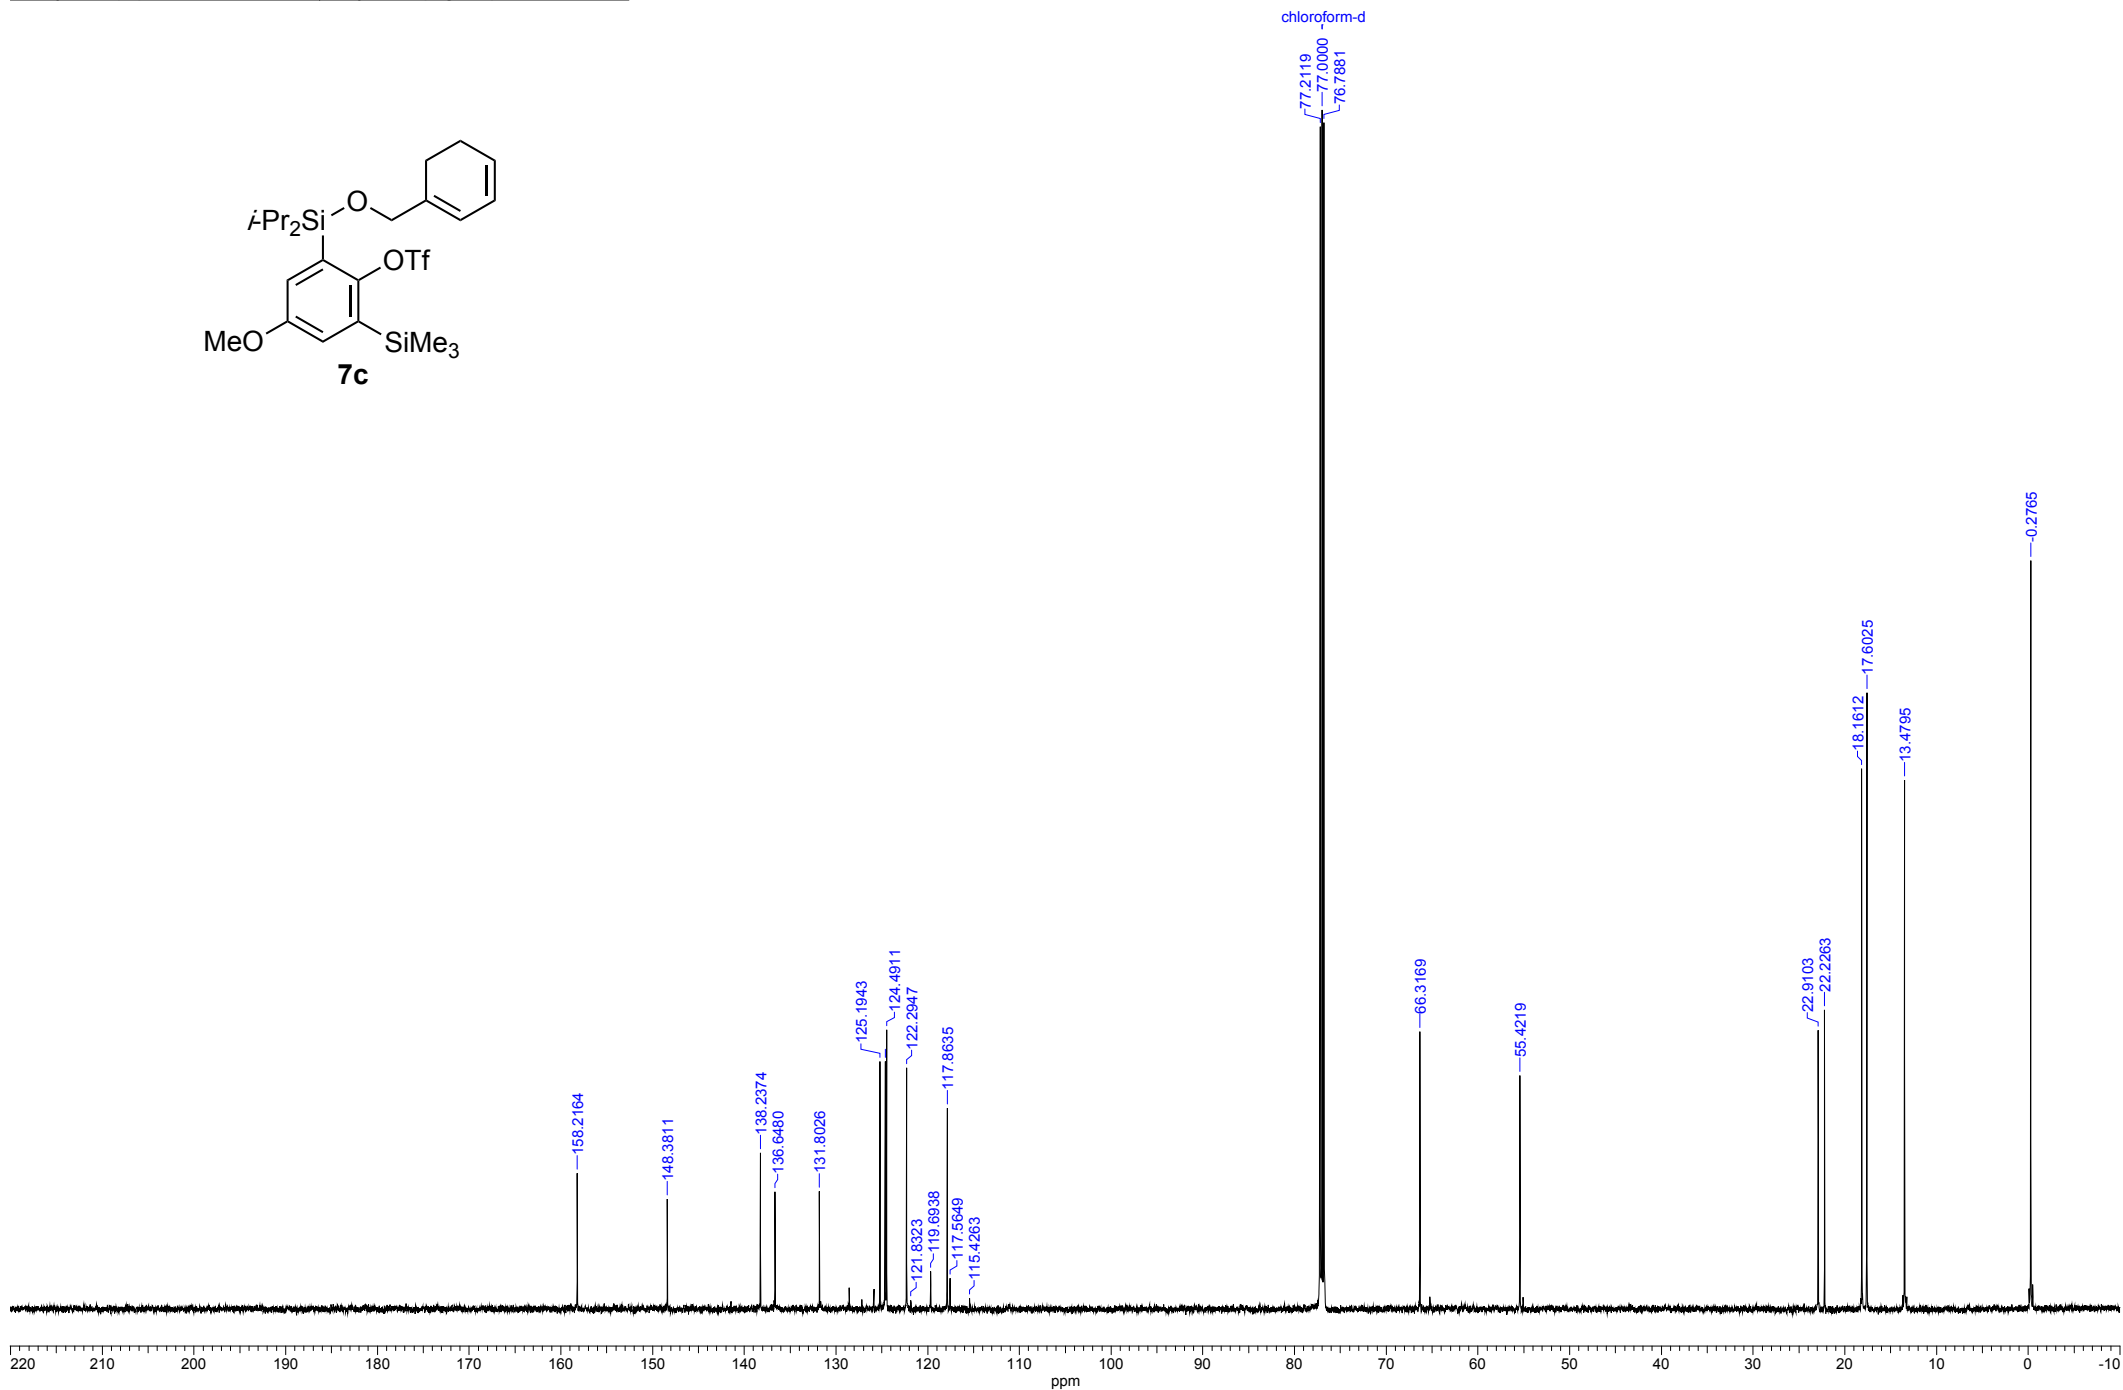

|                        |         |                        |                      |              |                                       |                 |                  |         |              |
|------------------------|---------|------------------------|----------------------|--------------|---------------------------------------|-----------------|------------------|---------|--------------|
| Acquisition Time (sec) | 3.4918  | Date                   | 18 Oct 2020 22:18:54 | File Name    | F:\NMR_CE_t_H\tawatar\TT0597-1H-1.als | Frequency (MHz) | 500.16           | Nucleus | 1H           |
| Number of Transients   | 8       | Original Points Count  | 26214                | Points Count | 26214                                 | Pulse Sequence  | single_pulse.ex2 | Solvent | CHLOROFORM-D |
| Sweep Width (Hz)       | 7507.39 | Temperature (degree C) | 18.500               |              |                                       |                 |                  |         |              |

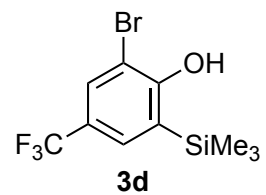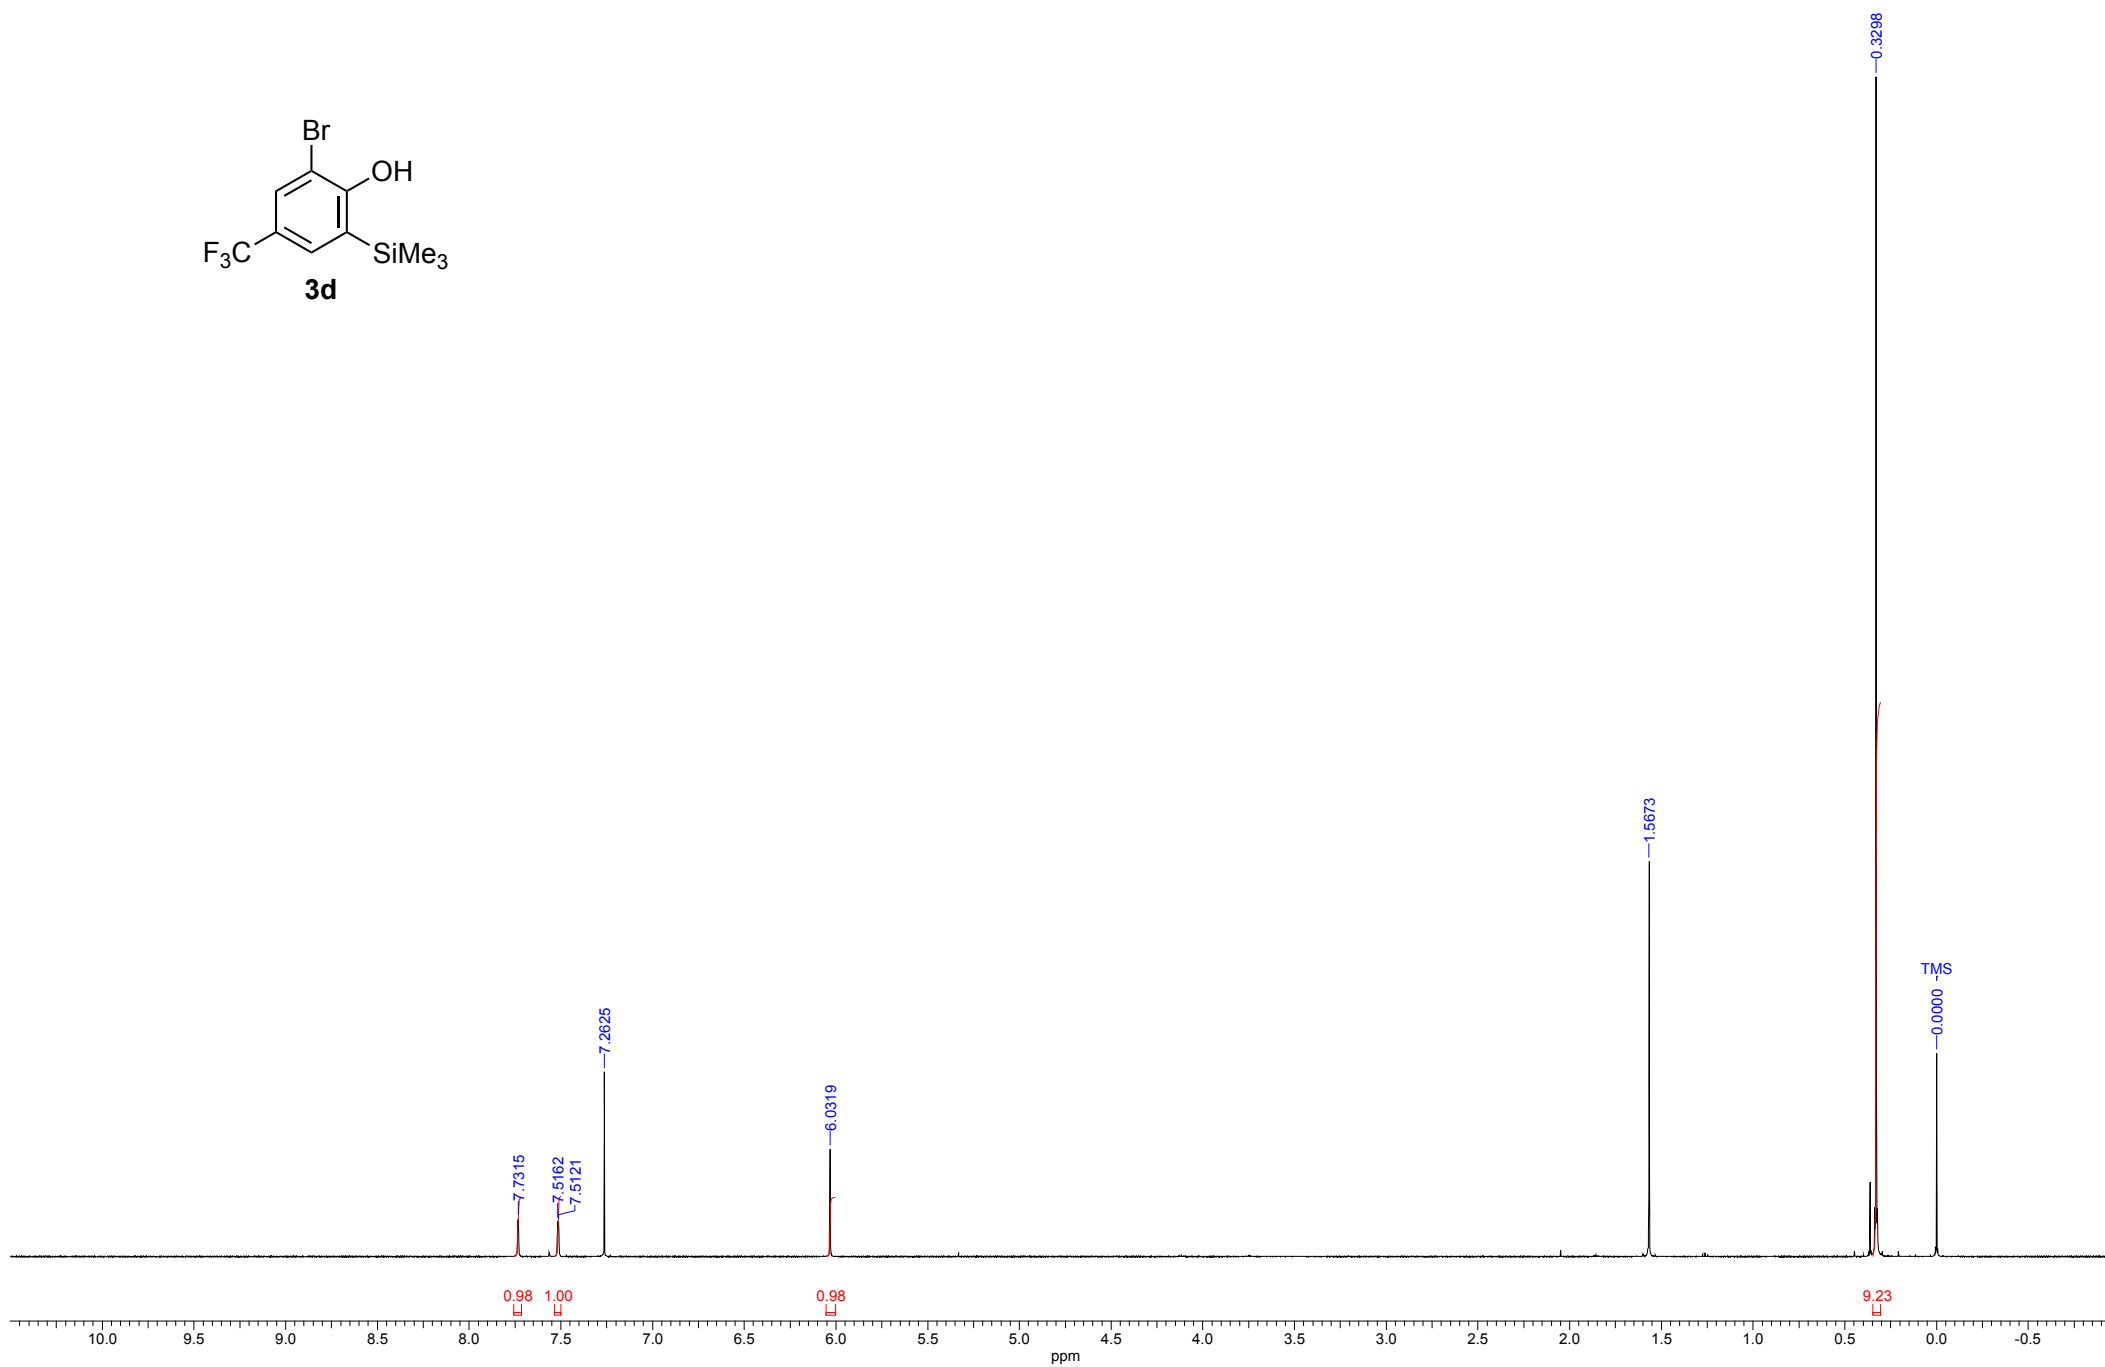



|                        |          |                        |                      |              |                                        |                 |                  |         |              |
|------------------------|----------|------------------------|----------------------|--------------|----------------------------------------|-----------------|------------------|---------|--------------|
| Acquisition Time (sec) | 0.8336   | Date                   | 18 Oct 2020 22:18:46 | File Name    | F:\NMR_CE_t_H\tawatar\TT0597-13C-1.als | Frequency (MHz) | 125.77           | Nucleus | 13C          |
| Number of Transients   | 256      | Original Points Count  | 26214                | Points Count | 26214                                  | Pulse Sequence  | single_pulse_dec | Solvent | CHLOROFORM-D |
| Sweep Width (Hz)       | 31446.06 | Temperature (degree C) | 19.300               |              |                                        |                 |                  |         |              |

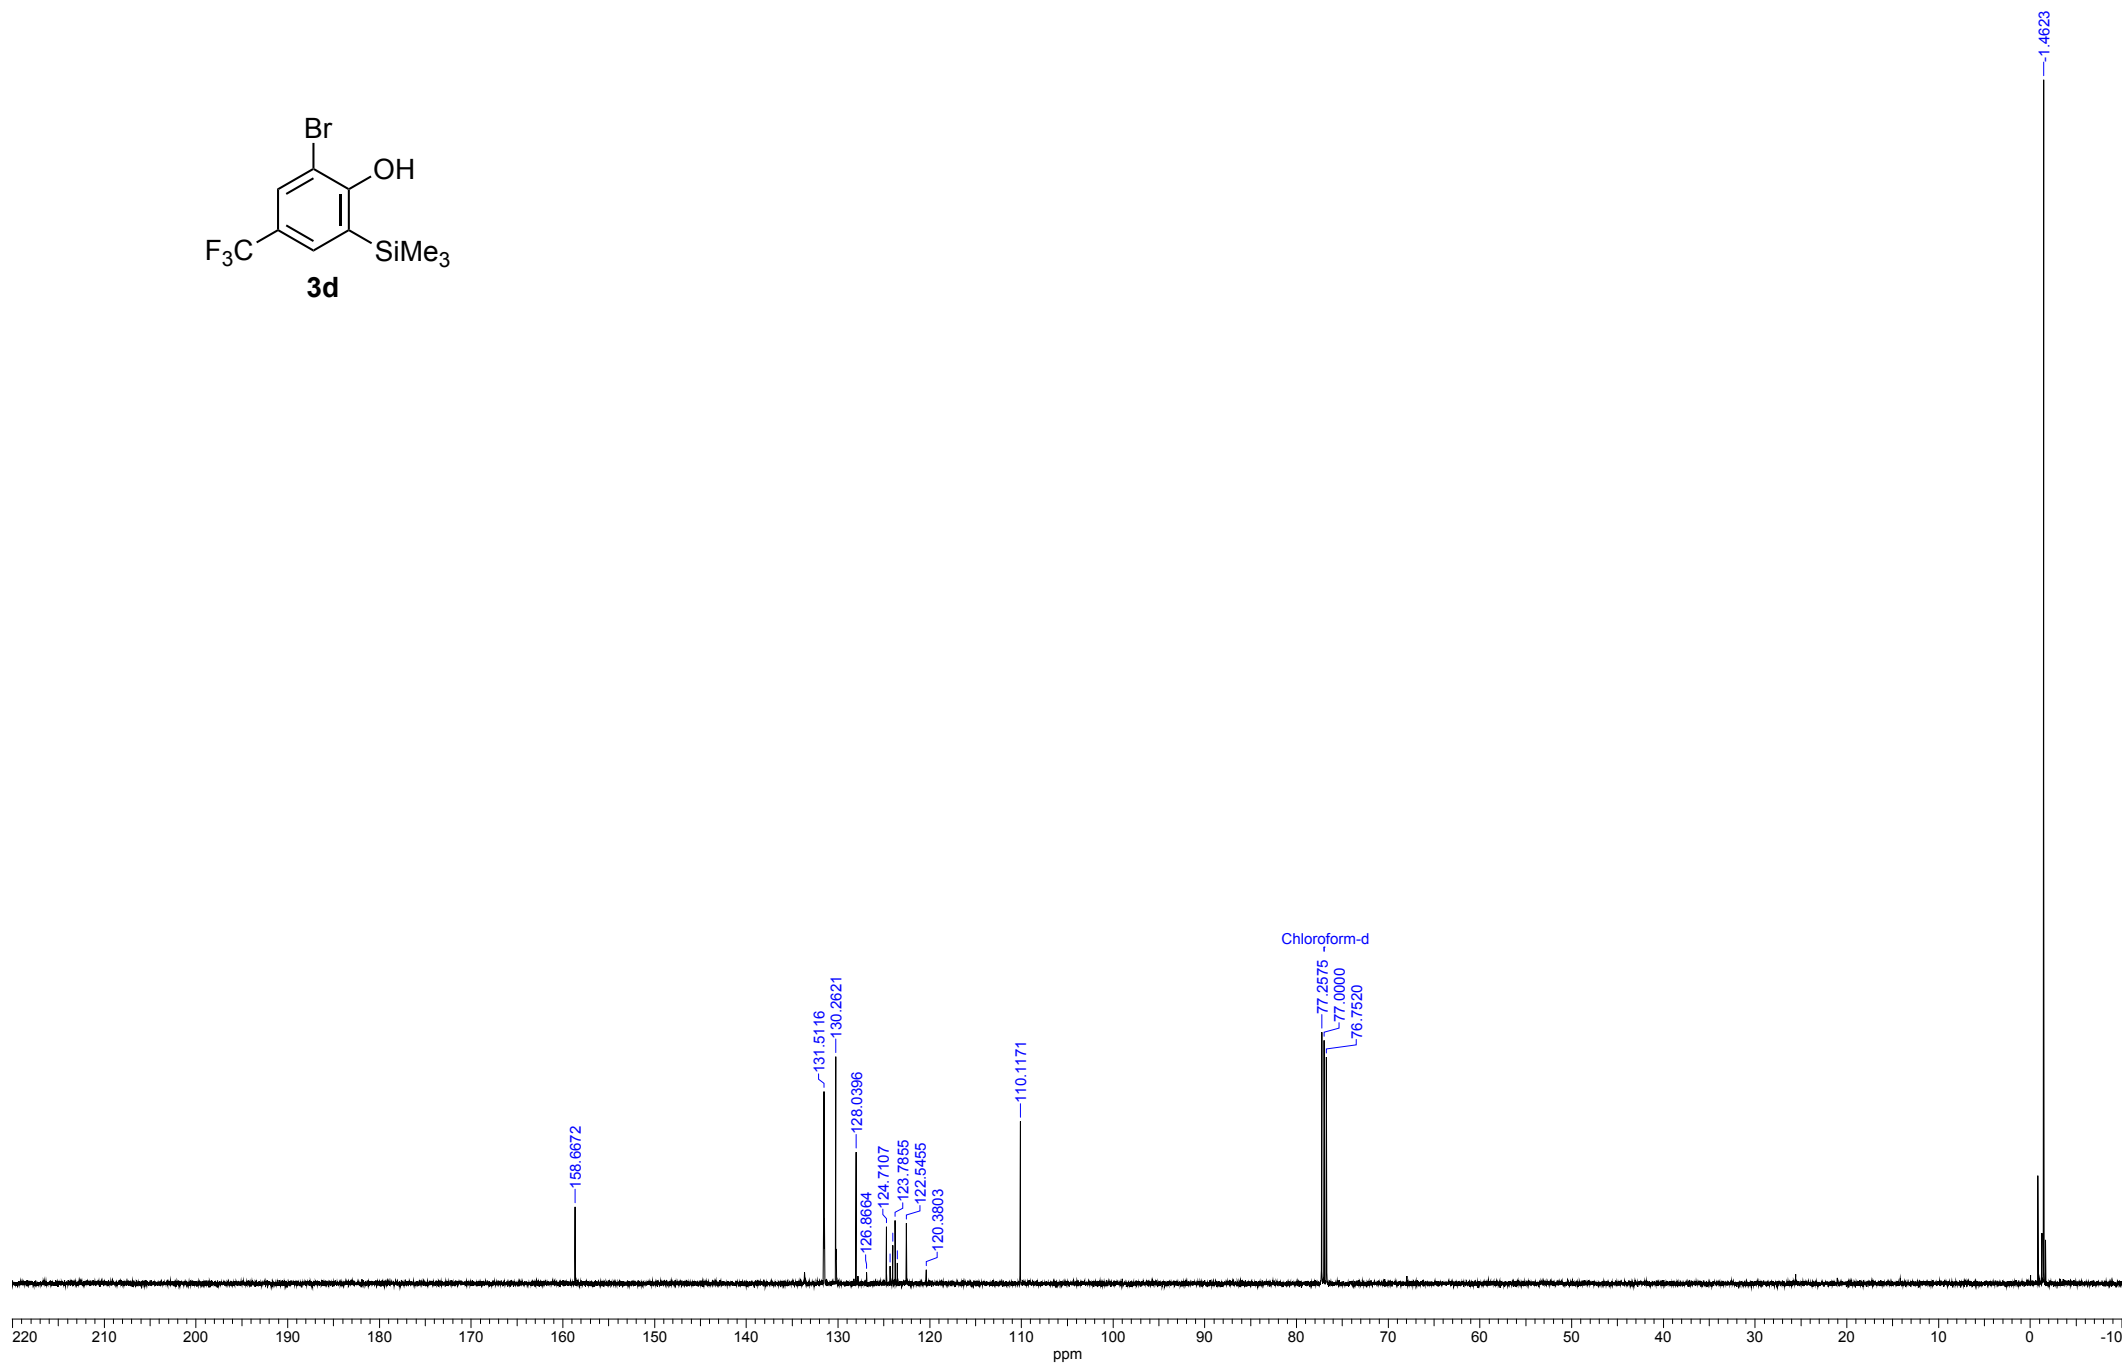

|                        |         |                        |                      |              |                                           |                 |                  |         |              |
|------------------------|---------|------------------------|----------------------|--------------|-------------------------------------------|-----------------|------------------|---------|--------------|
| Acquisition Time (sec) | 3.4918  | Date                   | 03 Oct 2020 14:38:20 | File Name    | F:\NMR_CE_t_H\tawatari\TT0598column-1.als | Frequency (MHz) | 500.16           | Nucleus | 1H           |
| Number of Transients   | 8       | Original Points Count  | 26214                | Points Count | 26214                                     | Pulse Sequence  | single_pulse.ex2 | Solvent | CHLOROFORM-D |
| Sweep Width (Hz)       | 7507.39 | Temperature (degree C) | 18.600               |              |                                           |                 |                  |         |              |

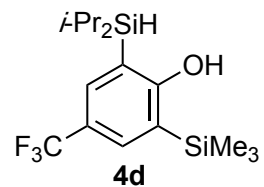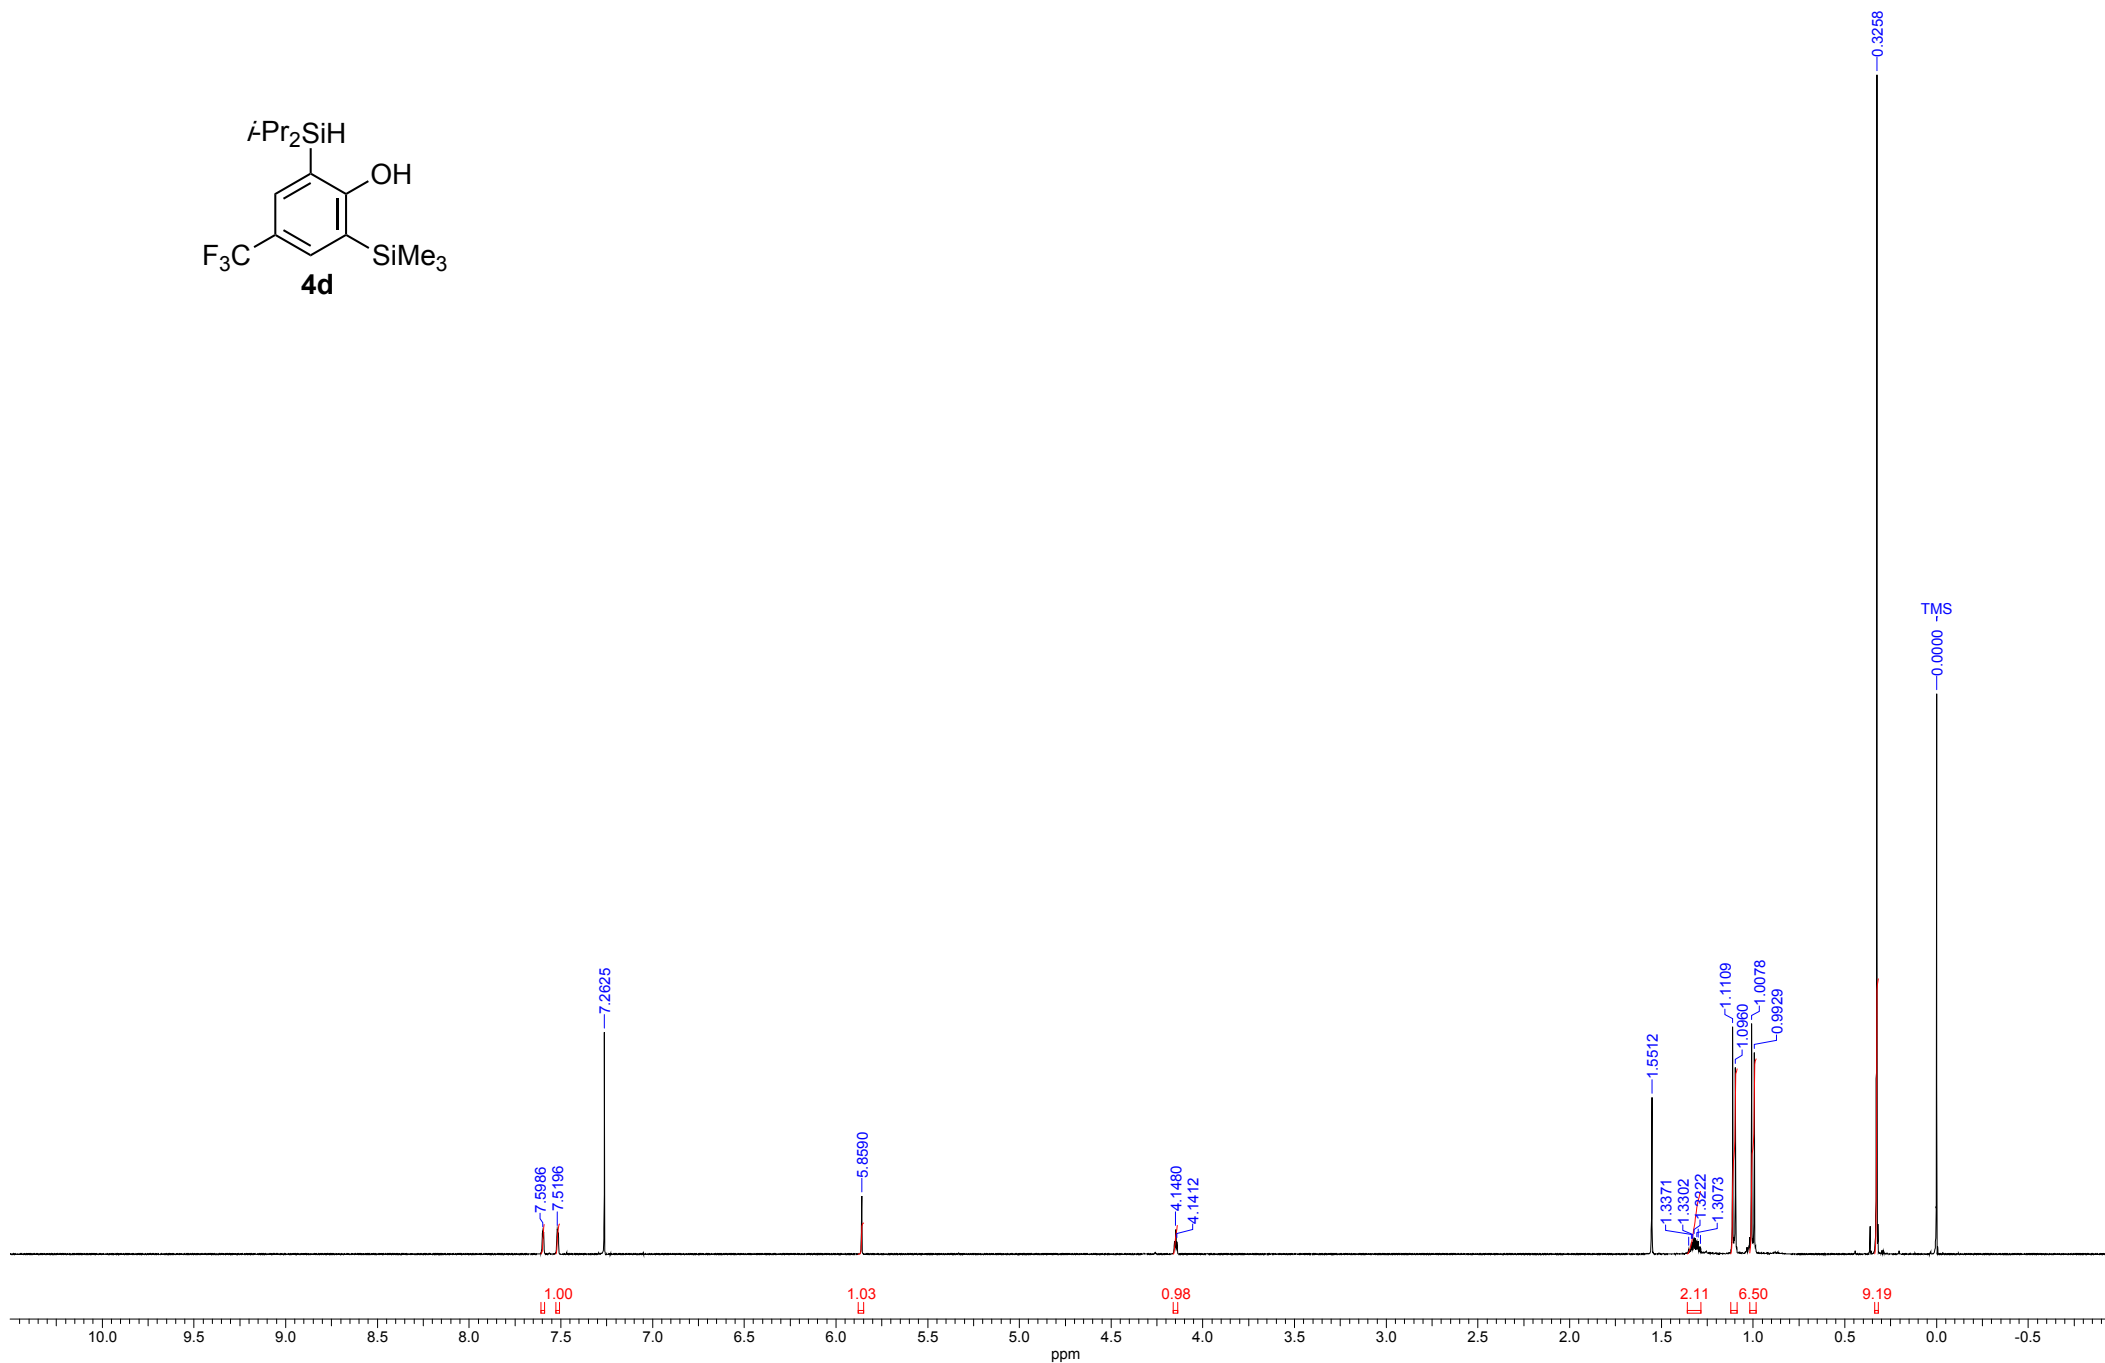

|                        |          |                        |                      |              |                                        |                 |                  |         |              |
|------------------------|----------|------------------------|----------------------|--------------|----------------------------------------|-----------------|------------------|---------|--------------|
| Acquisition Time (sec) | 0.8336   | Date                   | 14 Oct 2020 23:18:30 | File Name    | F:\NMR_CE t H \tawarani\TT0598-13C.als | Frequency (MHz) | 125.00           | Nucleus | 13C          |
| Number of Transients   | 256      | Original Points Count  | 26214                | Points Count | 26214                                  | Pulse Sequence  | single_pulse_dec | Solvent | CHLOROFORM-D |
| Sweep Width (Hz)       | 31444.86 | Temperature (degree C) | 19.200               |              |                                        |                 |                  |         |              |

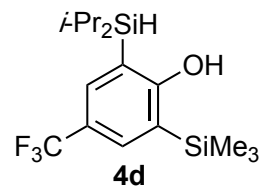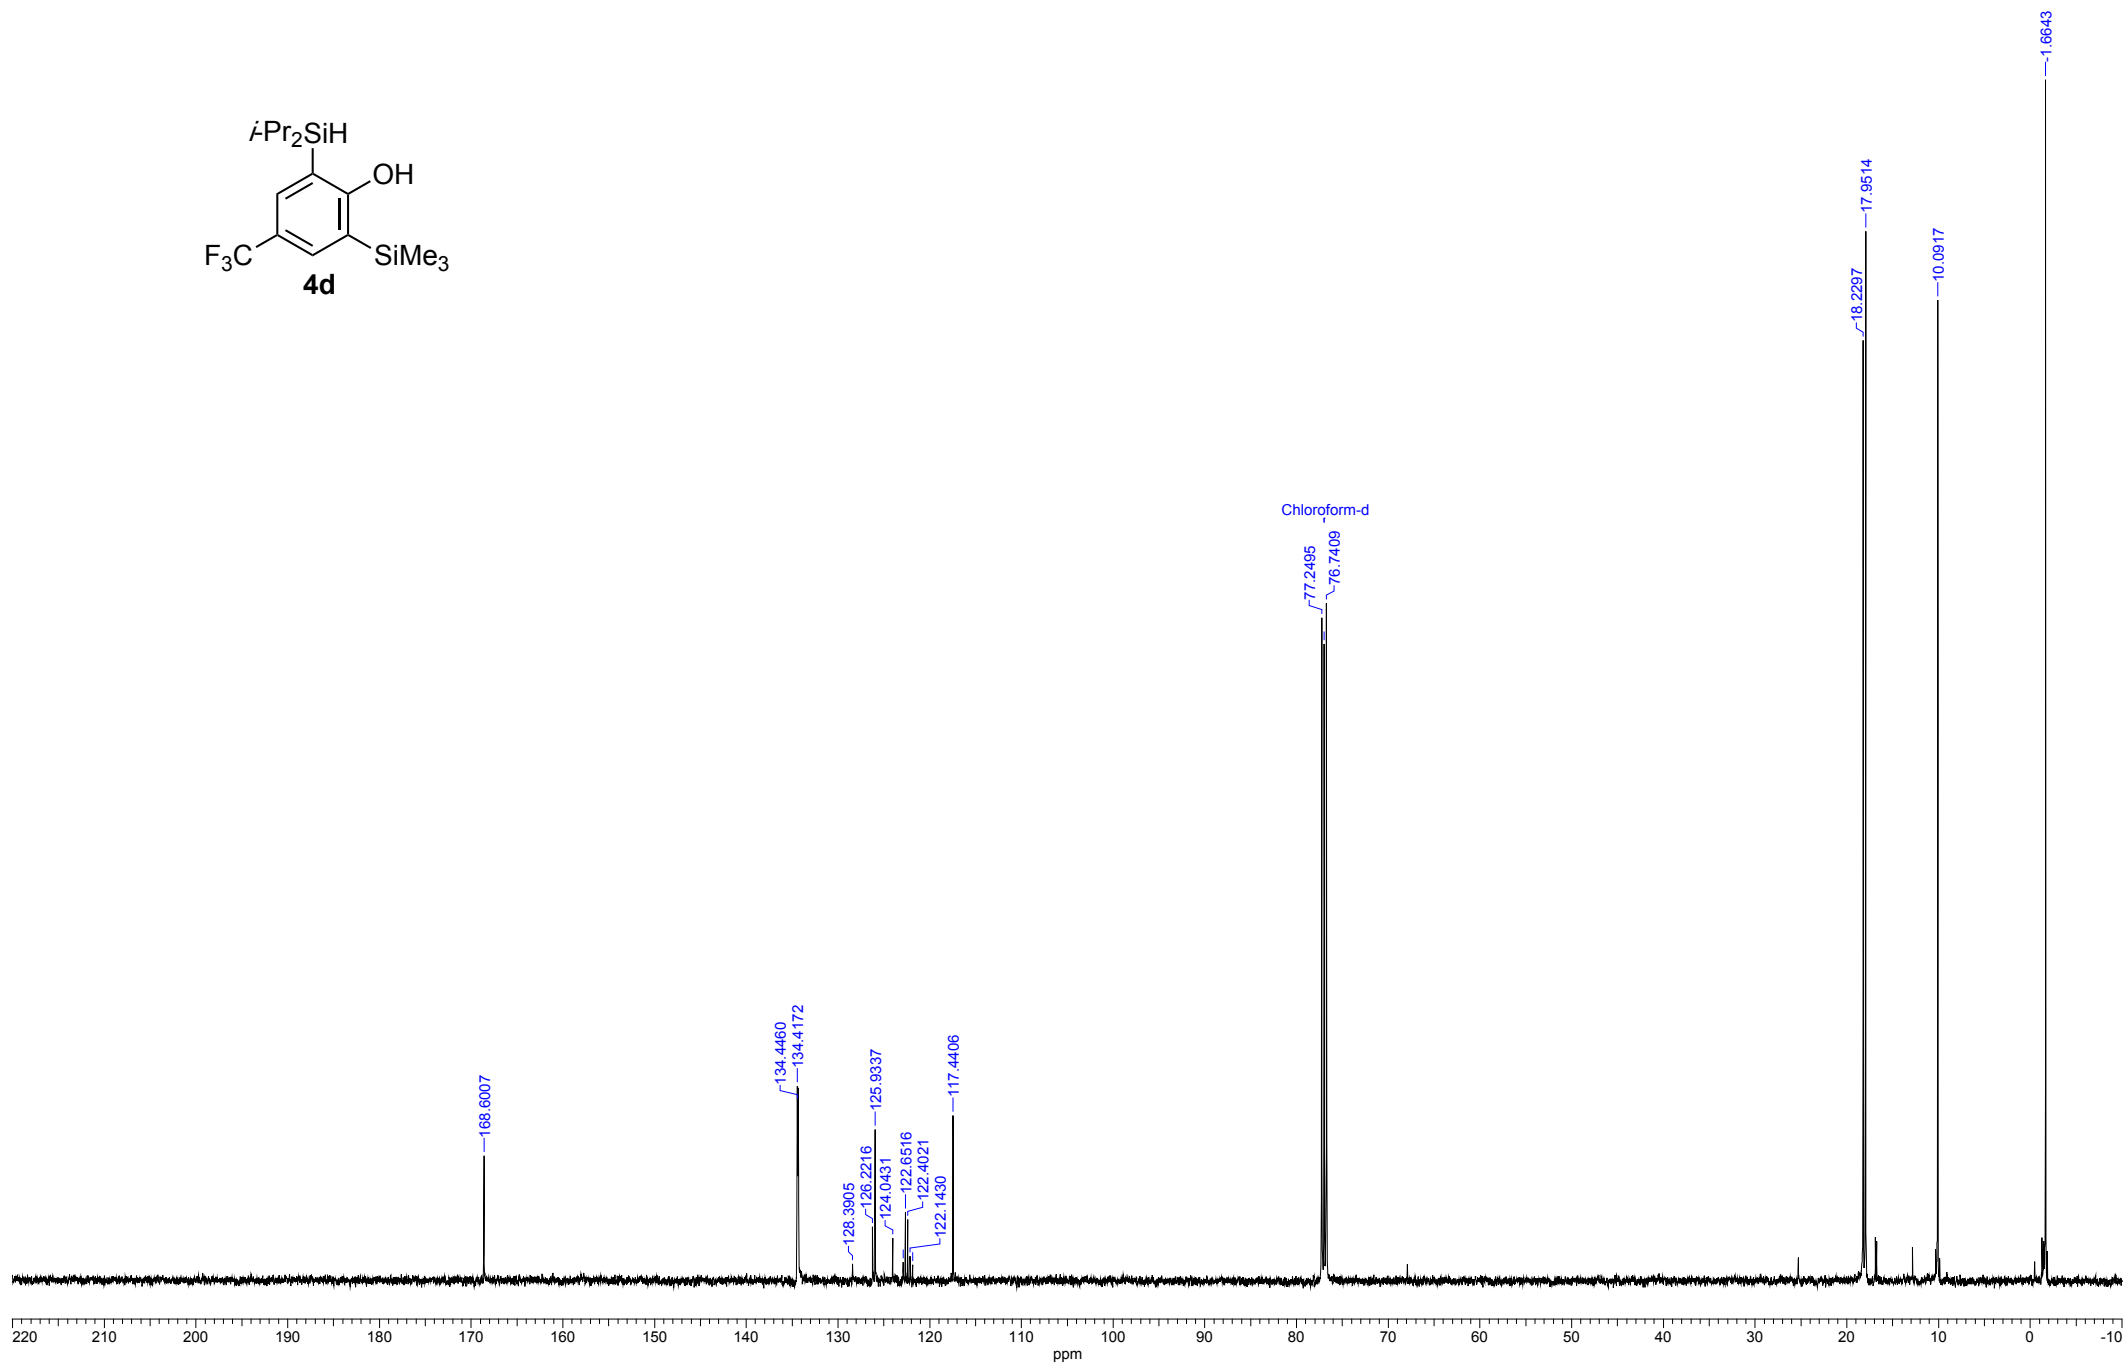

|                        |         |                        |                      |              |                                           |                 |                  |         |              |
|------------------------|---------|------------------------|----------------------|--------------|-------------------------------------------|-----------------|------------------|---------|--------------|
| Acquisition Time (sec) | 3.4918  | Date                   | 14 Oct 2020 16:51:48 | File Name    | F:\NMR CE t H \tawatari\TT0600ptlc1-1.als | Frequency (MHz) | 500.16           | Nucleus | 1H           |
| Number of Transients   | 8       | Original Points Count  | 26214                | Points Count | 26214                                     | Pulse Sequence  | single_pulse.ex2 | Solvent | CHLOROFORM-D |
| Sweep Width (Hz)       | 7507.39 | Temperature (degree C) | 18.400               |              |                                           |                 |                  |         |              |

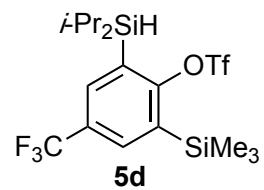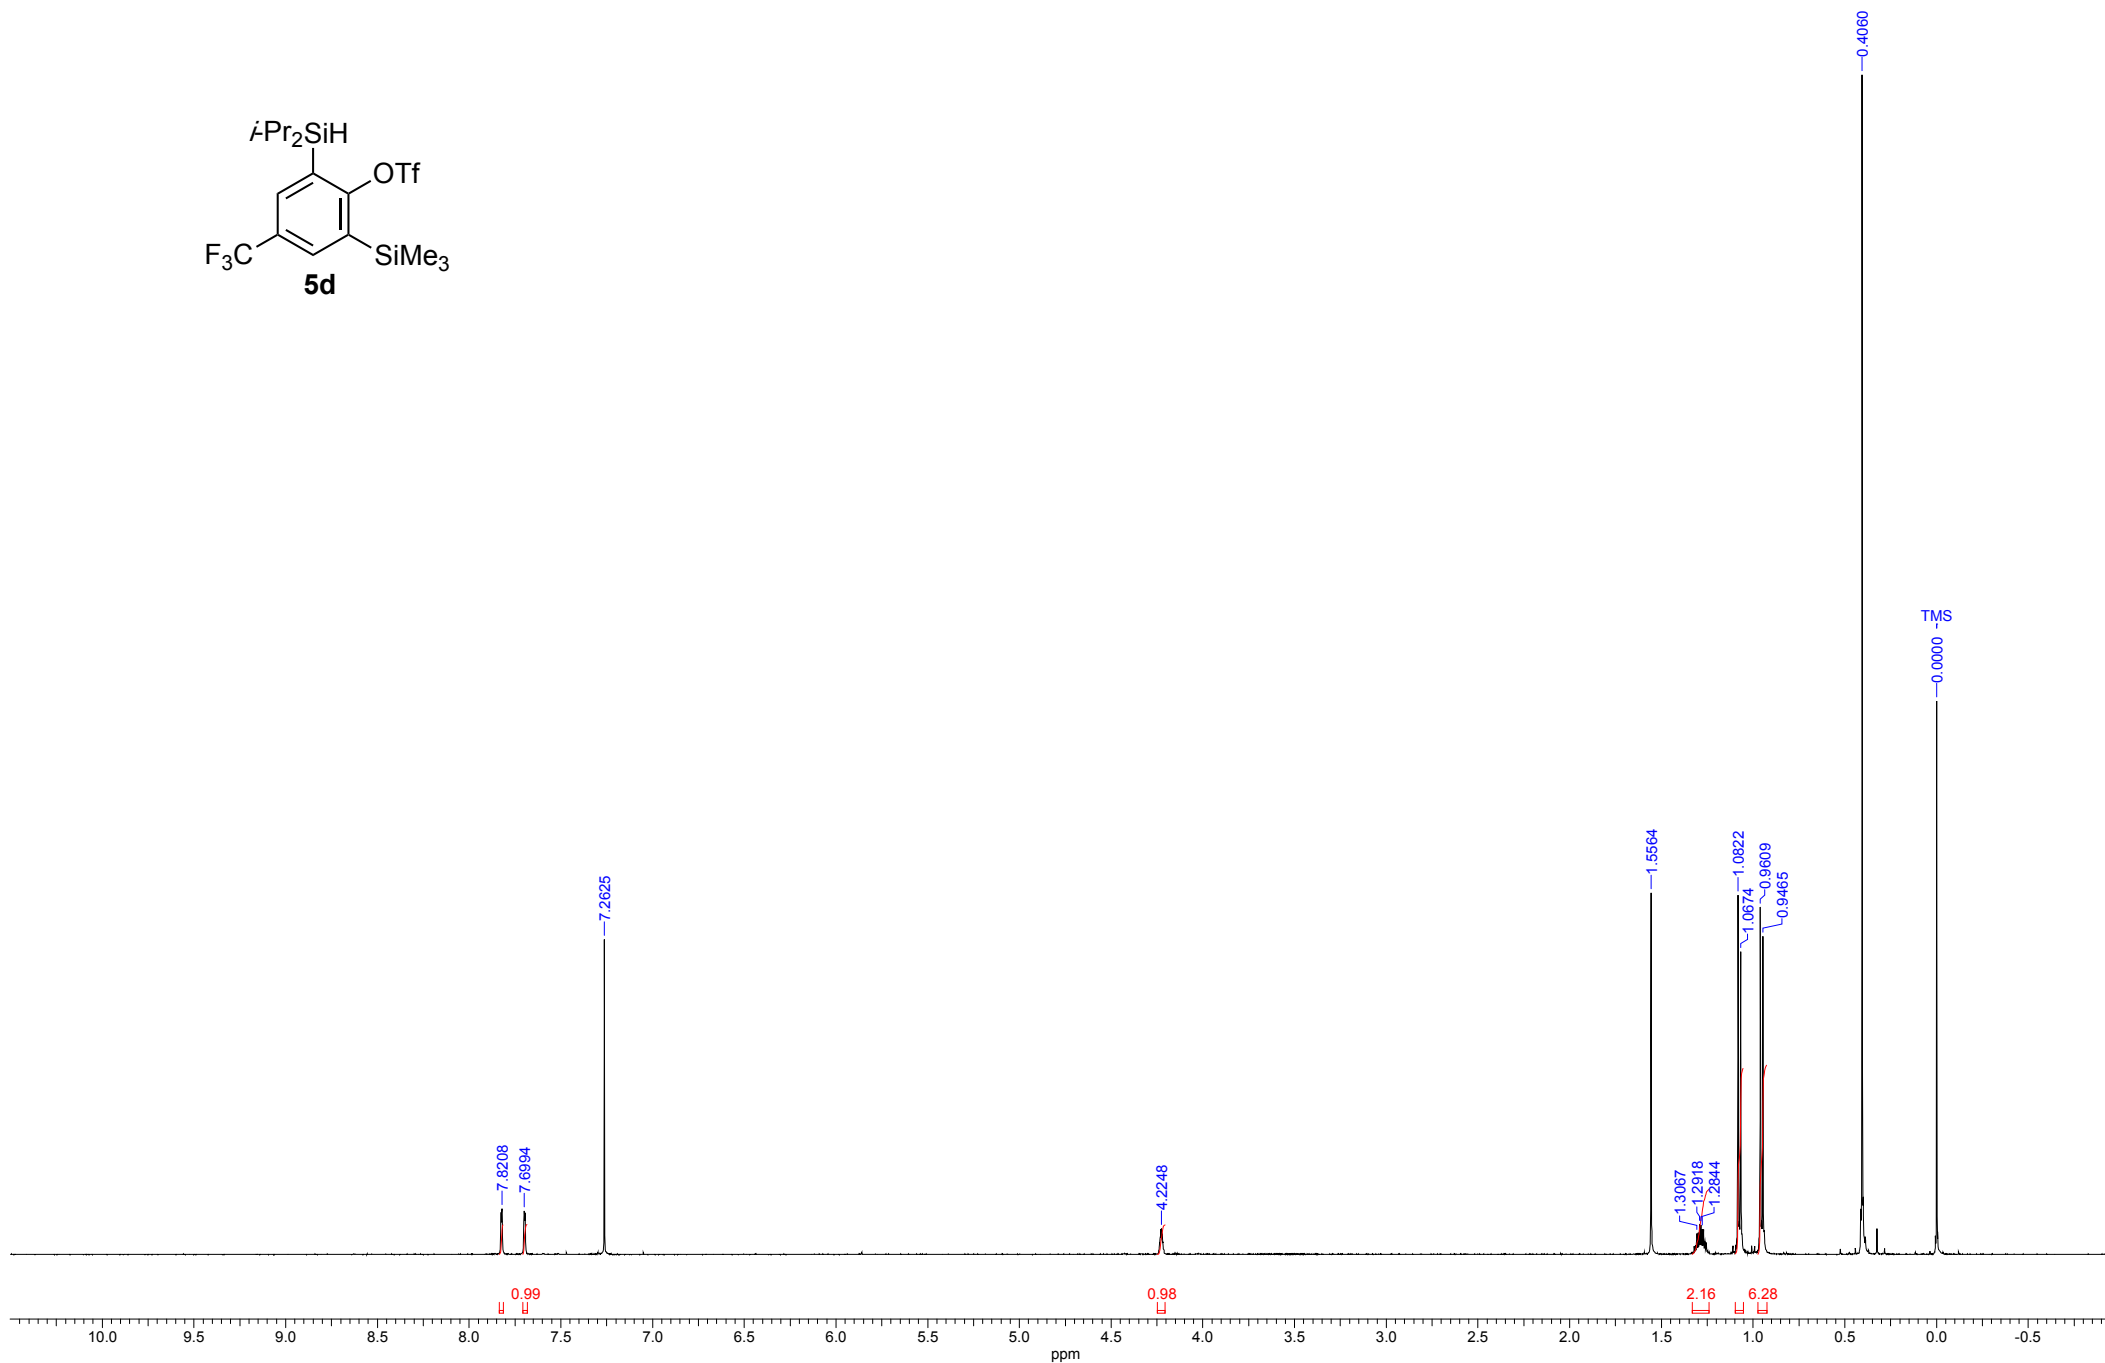

|                        |          |                        |                      |              |                                         |                 |                  |         |              |
|------------------------|----------|------------------------|----------------------|--------------|-----------------------------------------|-----------------|------------------|---------|--------------|
| Acquisition Time (sec) | 0.8336   | Date                   | 05 Oct 2020 17:52:44 | File Name    | F:\NMR CE t H \tawatar\TT0600-13C-1.als | Frequency (MHz) | 125.77           | Nucleus | 13C          |
| Number of Transients   | 256      | Original Points Count  | 26214                | Points Count | 26214                                   | Pulse Sequence  | single_pulse_dec | Solvent | CHLOROFORM-D |
| Sweep Width (Hz)       | 31446.06 | Temperature (degree C) | 18.900               |              |                                         |                 |                  |         |              |

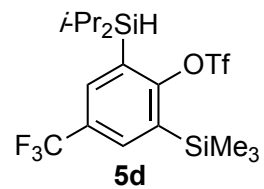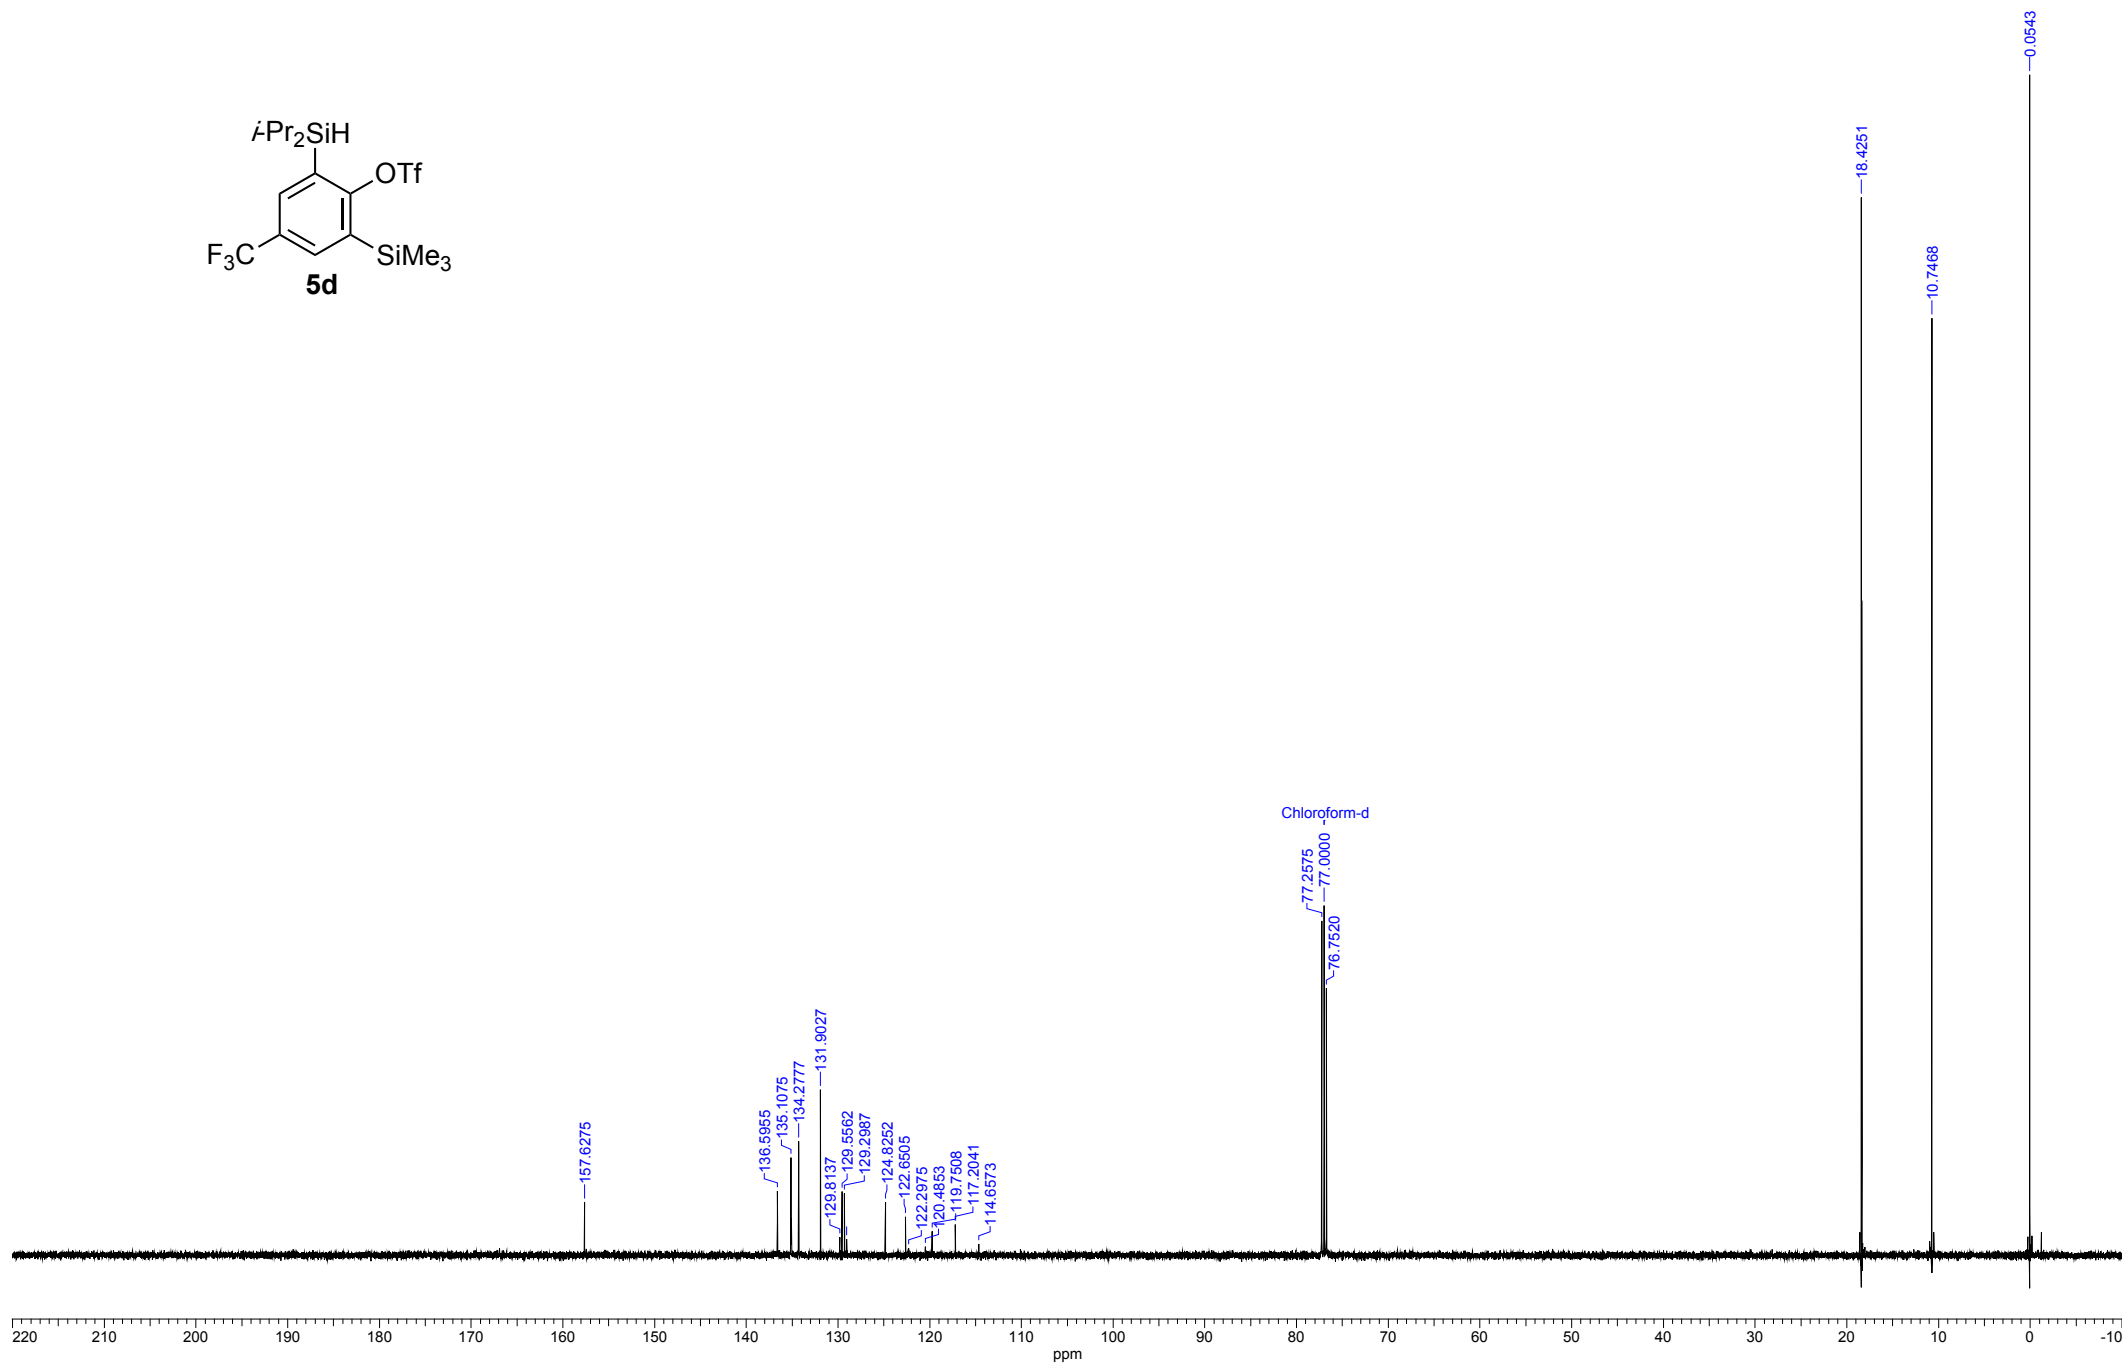

|                        |         |                        |              |                      |                      |                       |                                                  |              |
|------------------------|---------|------------------------|--------------|----------------------|----------------------|-----------------------|--------------------------------------------------|--------------|
| Acquisition Time (sec) | 1.8153  | Comment                | single pulse | Date                 | 25 Dec 2020 23:04:18 | File Name             | F:\NMR CE t H \tawatari\TT0675-1H_proton-1-1.als |              |
| Frequency (MHz)        | 600.17  | Nucleus                | 1H           | Number of Transients | 8                    | Original Points Count | 16384                                            |              |
| Sweep Width (Hz)       | 9025.27 | Temperature (degree C) | 19.200       | Points Count         | 13120                | Pulse Sequence        | proton.jxp                                       |              |
|                        |         |                        |              |                      |                      |                       | Solvent                                          | CHLOROFORM-D |

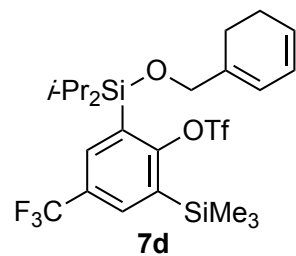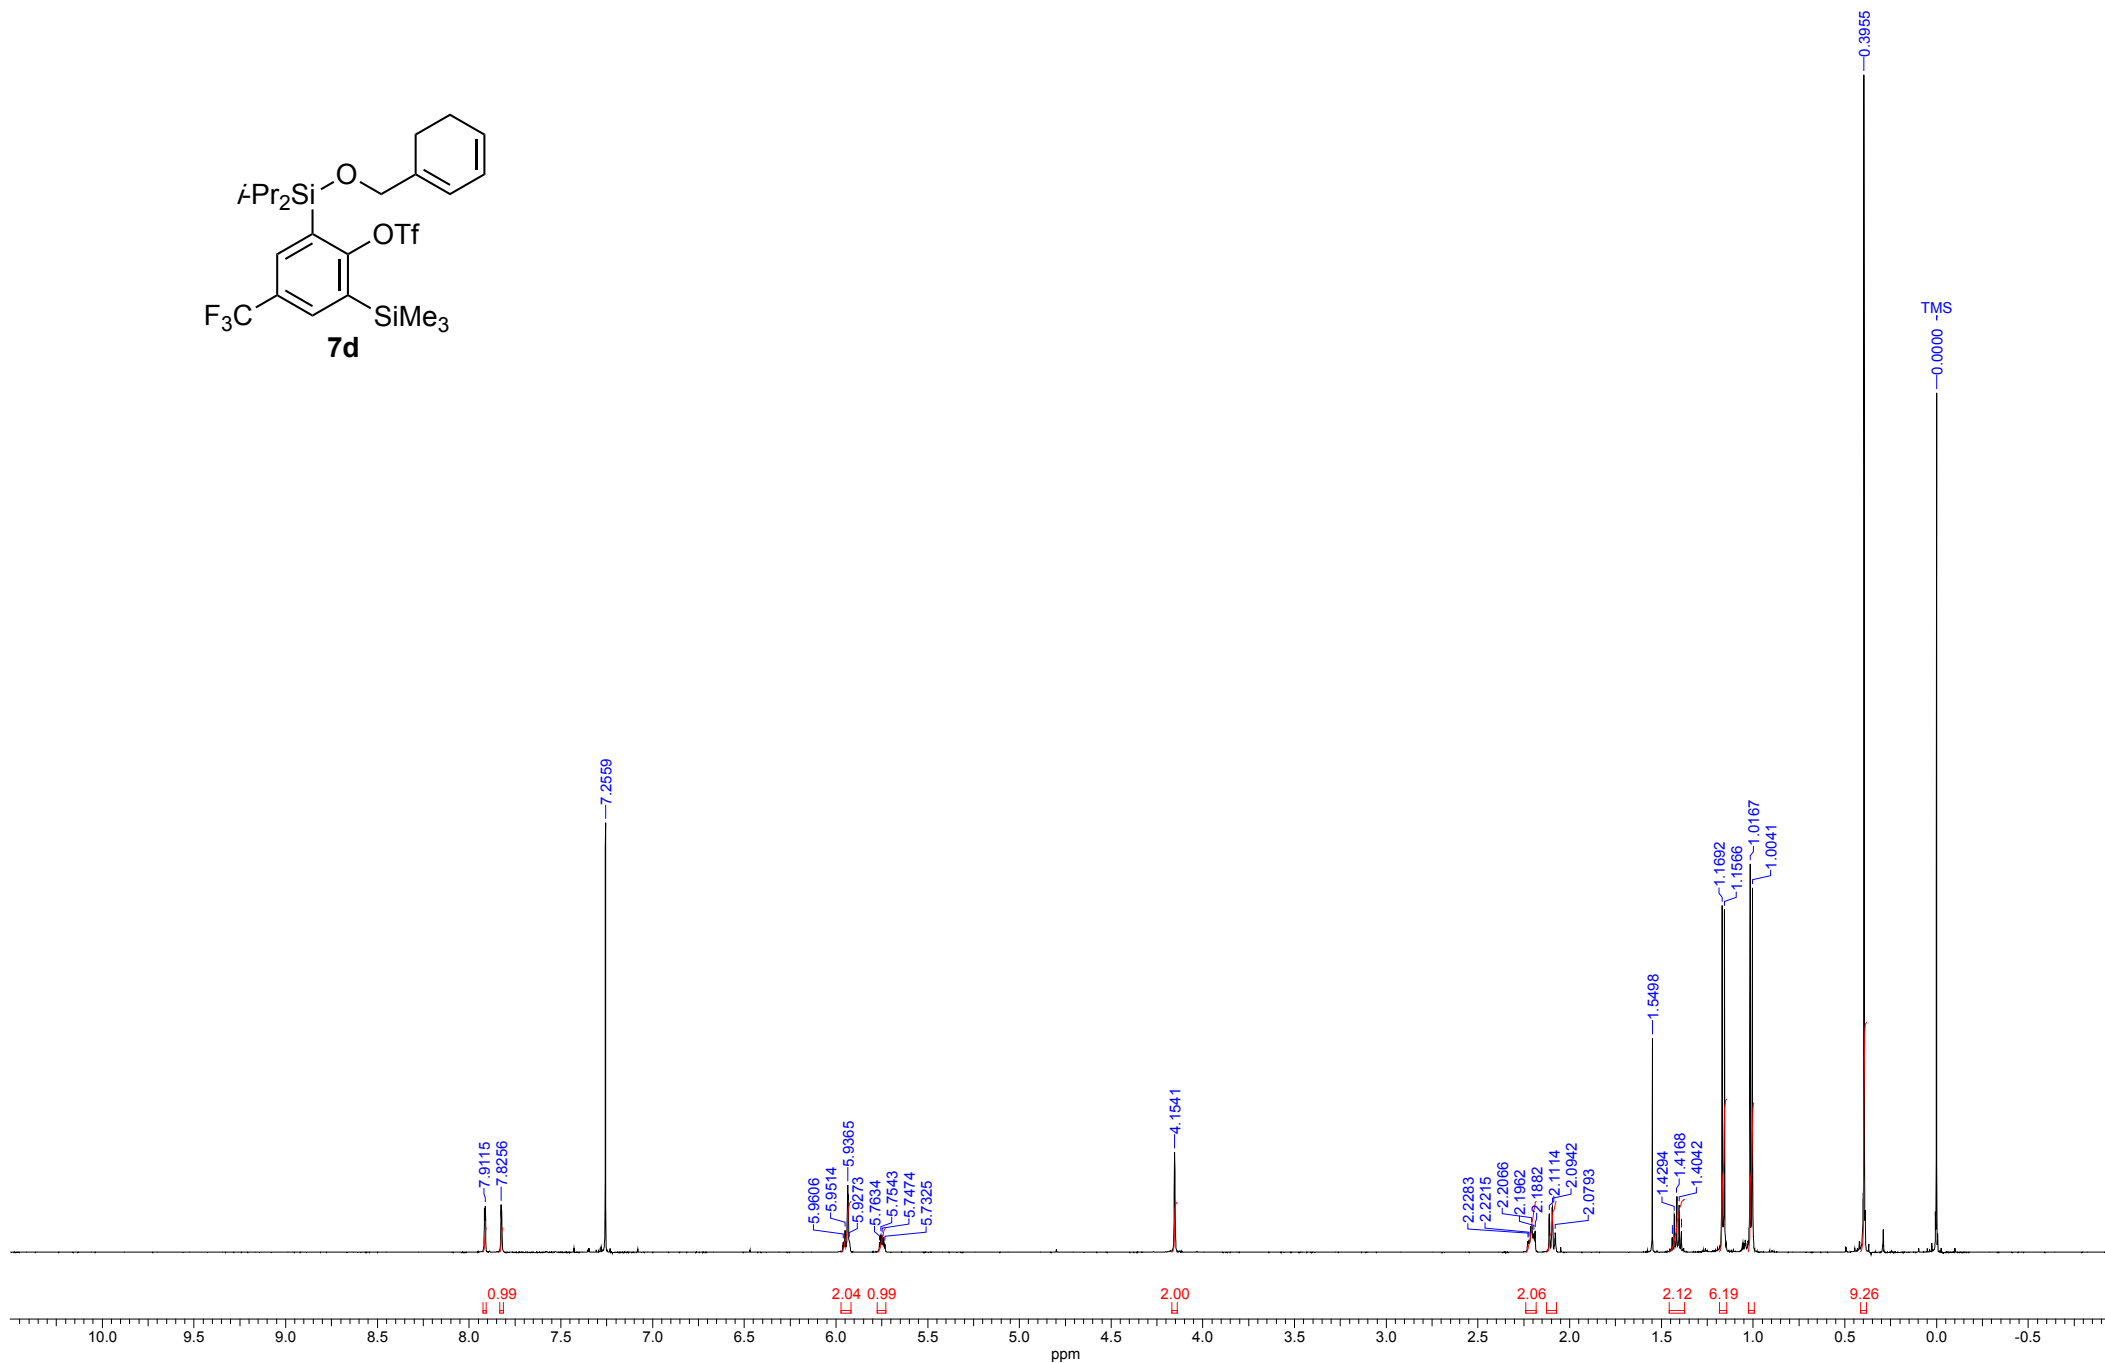

|                        |          |                        |                                  |                       |                      |              |                                                 |
|------------------------|----------|------------------------|----------------------------------|-----------------------|----------------------|--------------|-------------------------------------------------|
| Acquisition Time (sec) | 0.6921   | Comment                | single pulse decoupled gated NOE | Date                  | 25 Dec 2020 23:03:54 | File Name    | F:\NMR CE t H \tawatari\TT0675-13C carbon-1.als |
| Frequency (MHz)        | 150.00   | Number of Transients   | 1024                             | Original Points Count | 26214                | Points Count | 26214                                           |
| Sweep Width (Hz)       | 37876.77 | Temperature (degree C) | 19.700                           | Pulse Sequence        | carbon_cool.jxp      | Solvent      | CHLOROFORM-D                                    |

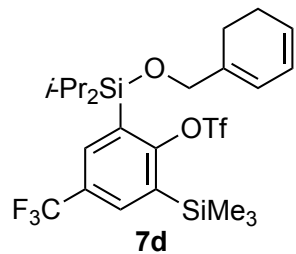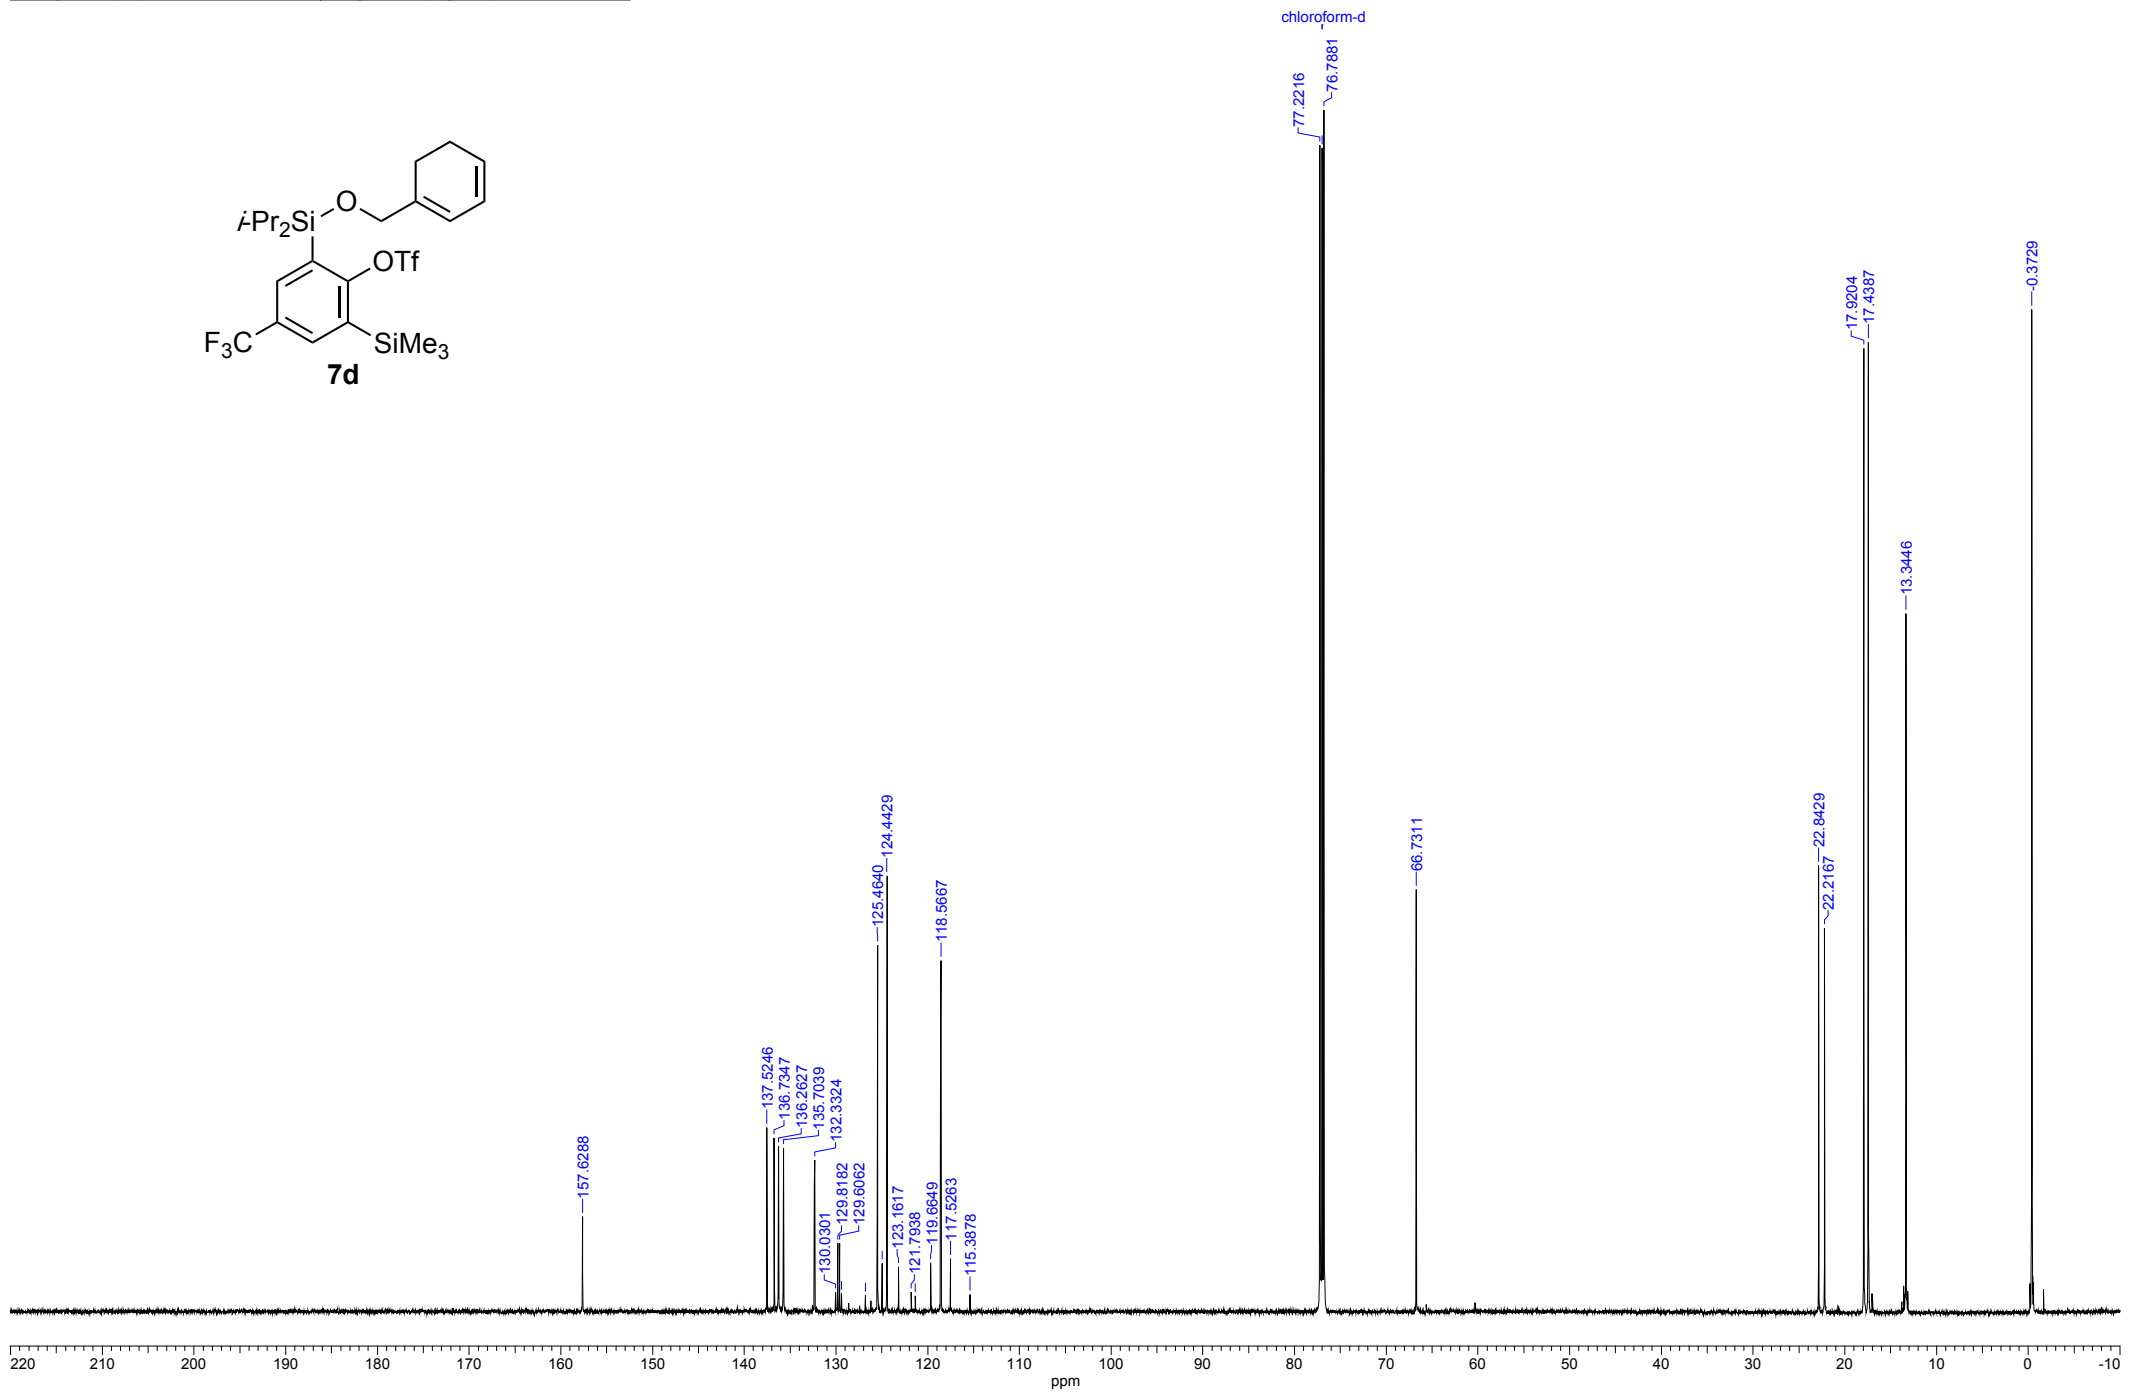

|                        |         |                        |                      |              |                                        |                 |                  |         |              |
|------------------------|---------|------------------------|----------------------|--------------|----------------------------------------|-----------------|------------------|---------|--------------|
| Acquisition Time (sec) | 3.4918  | Date                   | 02 Mar 2020 23:18:58 | File Name    | F:\NMR_CE_t_H\tawarani\TT0370-1H-1.als | Frequency (MHz) | 500.16           | Nucleus | 1H           |
| Number of Transients   | 8       | Original Points Count  | 26214                | Points Count | 26214                                  | Pulse Sequence  | single_pulse.ex2 | Solvent | CHLOROFORM-D |
| Sweep Width (Hz)       | 7507.39 | Temperature (degree C) | 19.300               |              |                                        |                 |                  |         |              |

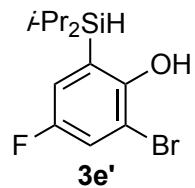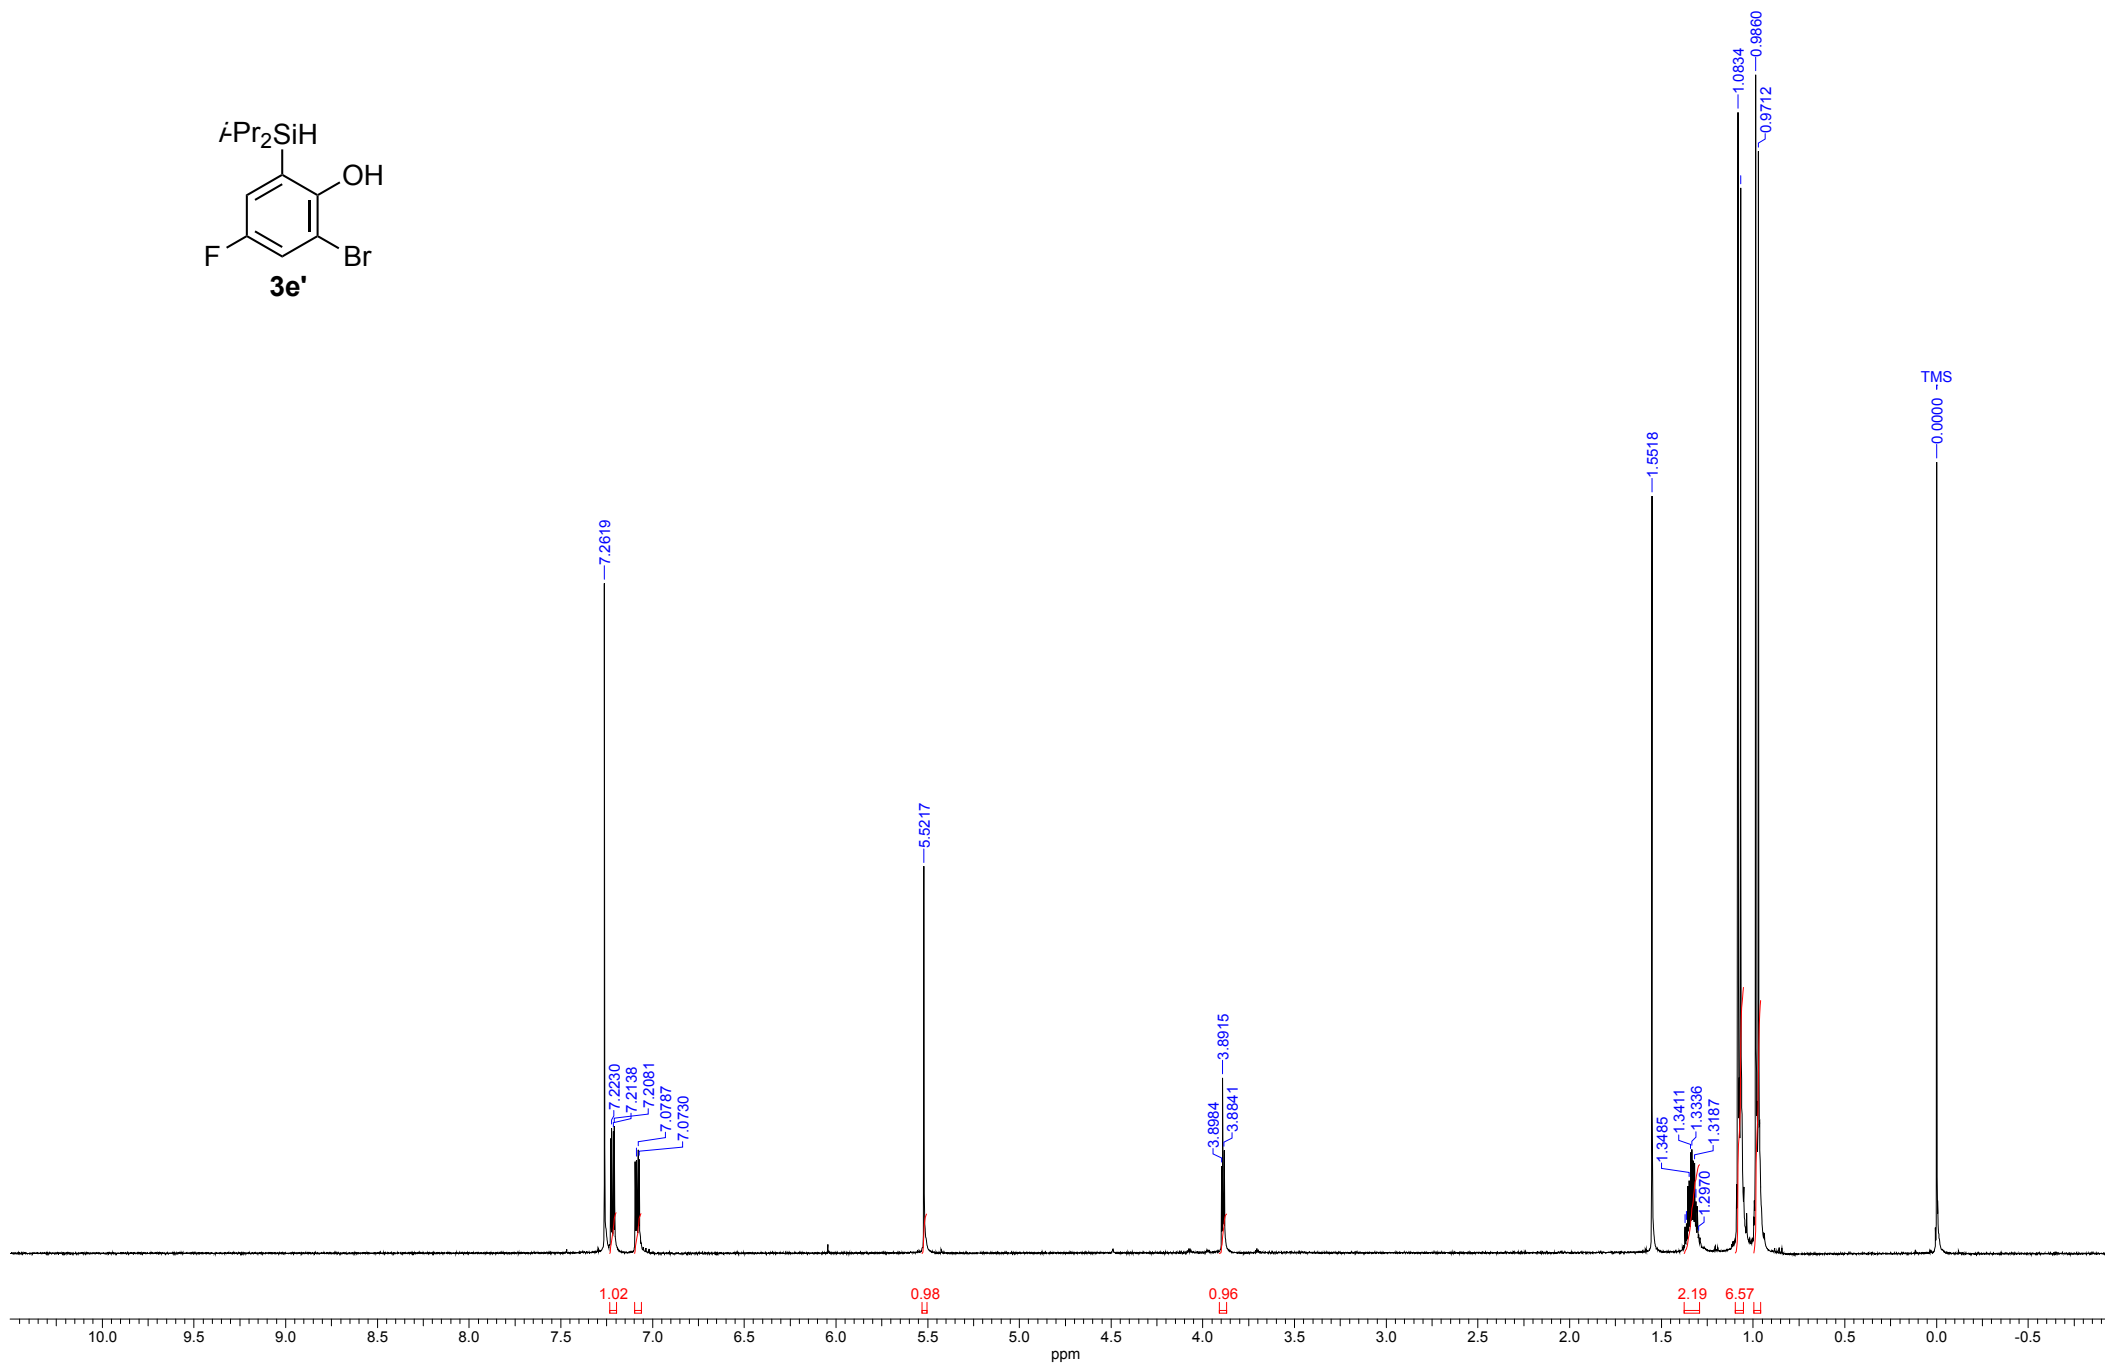



|                        |          |                        |                      |              |                                        |                 |                  |         |              |
|------------------------|----------|------------------------|----------------------|--------------|----------------------------------------|-----------------|------------------|---------|--------------|
| Acquisition Time (sec) | 0.8336   | Date                   | 28 Feb 2020 21:03:34 | File Name    | F:\NMR_CE_t_H\tawatar\TT0370-13C-1.als | Frequency (MHz) | 125.77           | Nucleus | 13C          |
| Number of Transients   | 128      | Original Points Count  | 26214                | Points Count | 26214                                  | Pulse Sequence  | single_pulse_dec | Solvent | CHLOROFORM-D |
| Sweep Width (Hz)       | 31446.06 | Temperature (degree C) | 19.800               |              |                                        |                 |                  |         |              |

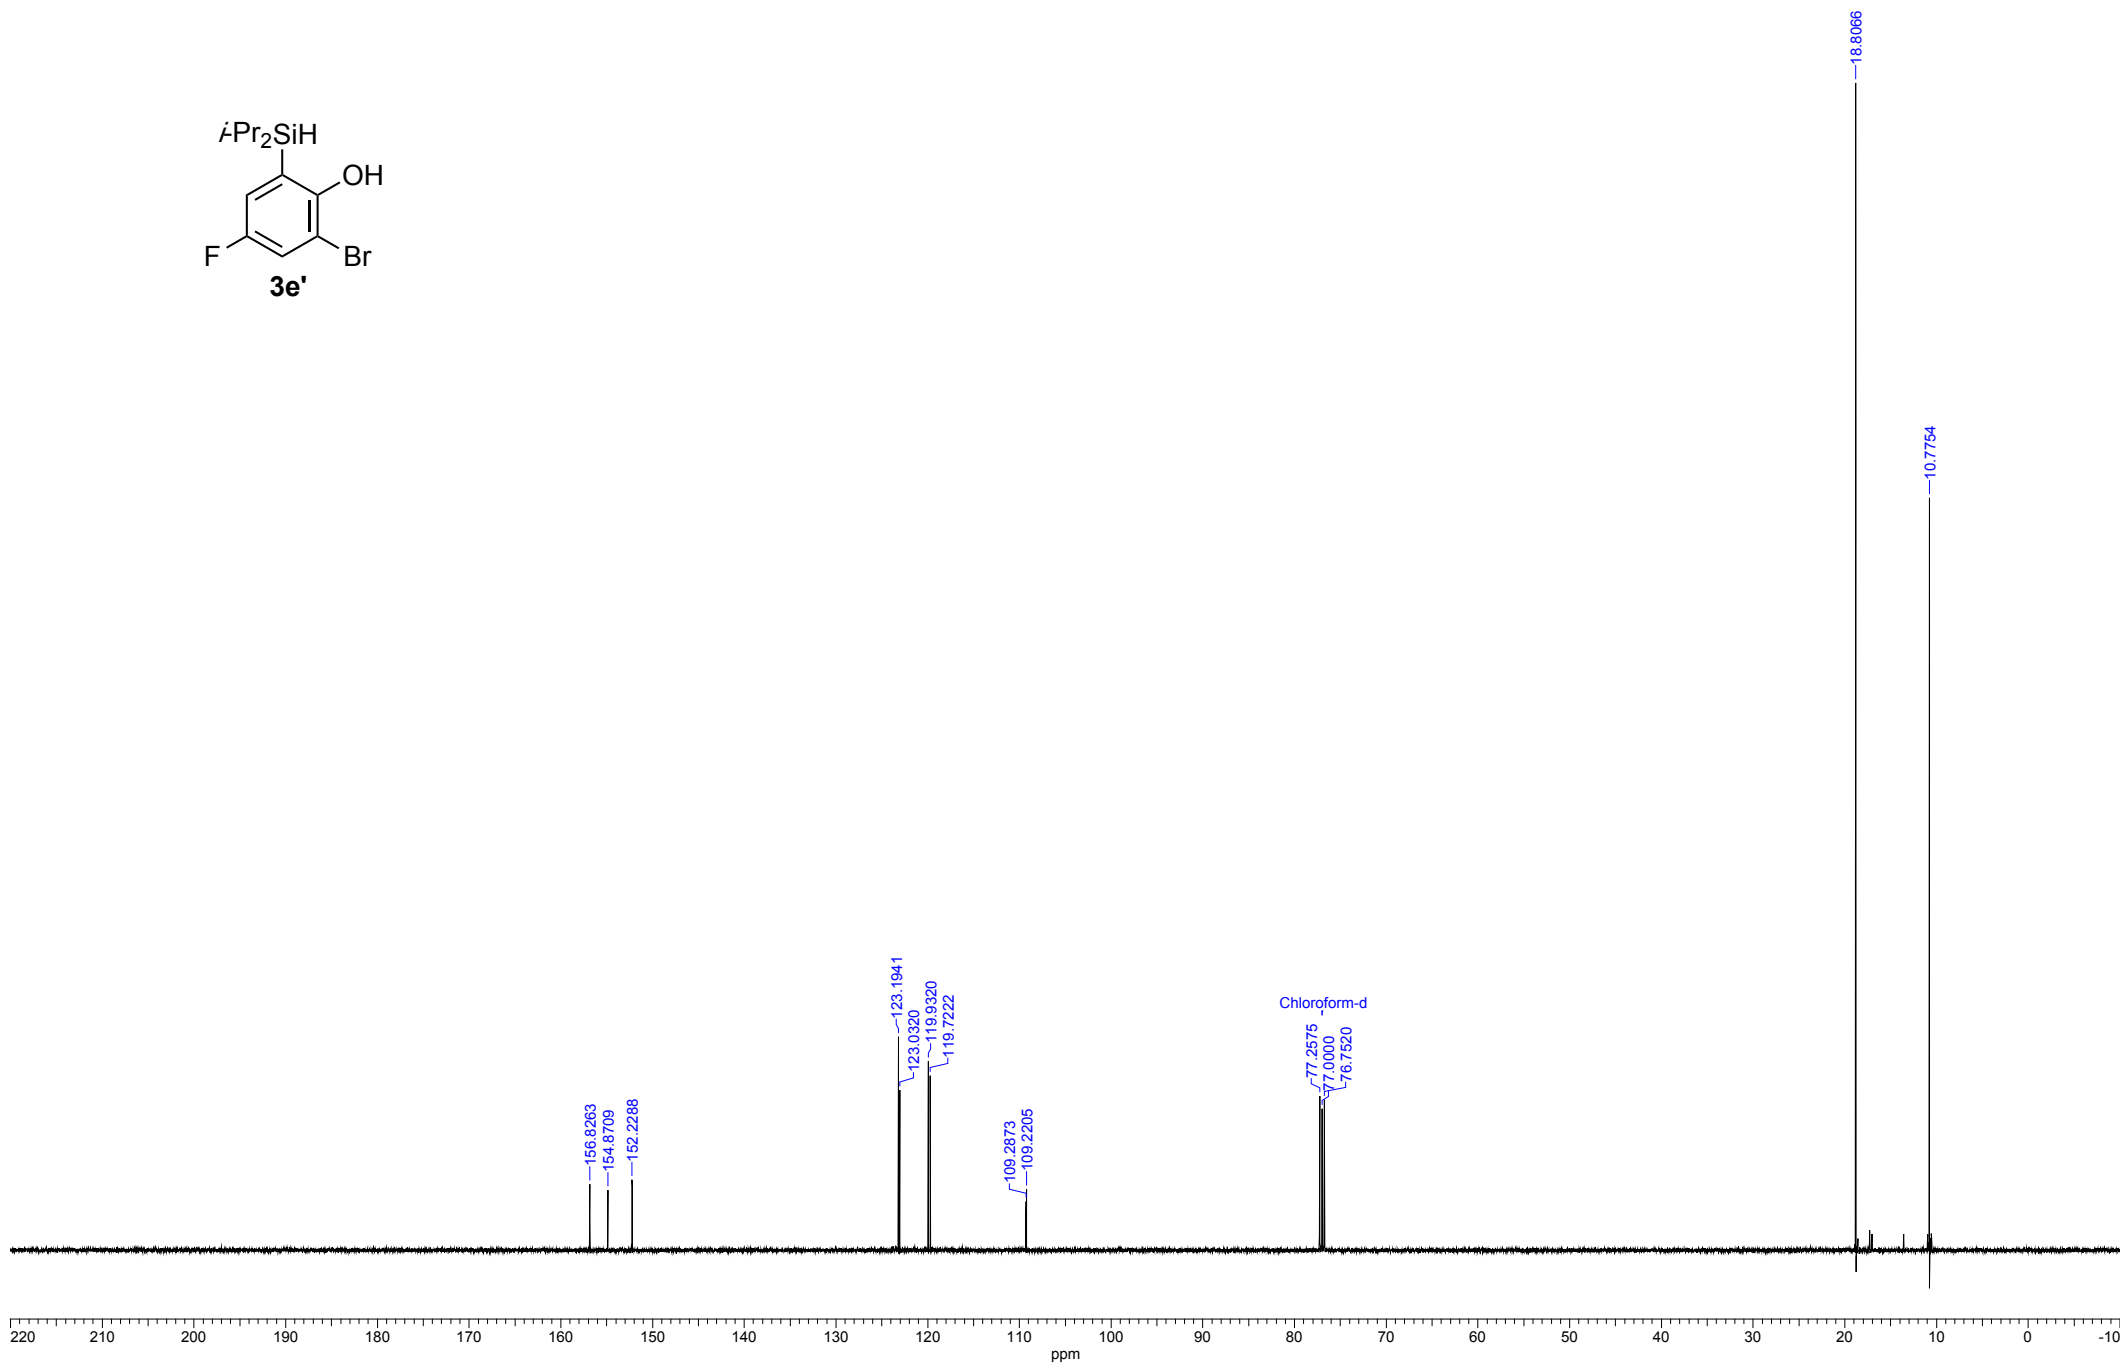

|                        |         |                        |                      |              |                                              |                 |                  |         |              |
|------------------------|---------|------------------------|----------------------|--------------|----------------------------------------------|-----------------|------------------|---------|--------------|
| Acquisition Time (sec) | 3.4918  | Date                   | 02 Mar 2020 22:48:52 | File Name    | F:\NMR_CE_t_H\tawatar\TT0376-1H-retake-1.als | Frequency (MHz) | 500.16           | Nucleus | 1H           |
| Number of Transients   | 8       | Original Points Count  | 26214                | Points Count | 26214                                        | Pulse Sequence  | single_pulse.ex2 | Solvent | CHLOROFORM-D |
| Sweep Width (Hz)       | 7507.39 | Temperature (degree C) | 19.700               |              |                                              |                 |                  |         |              |

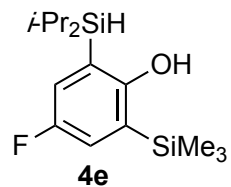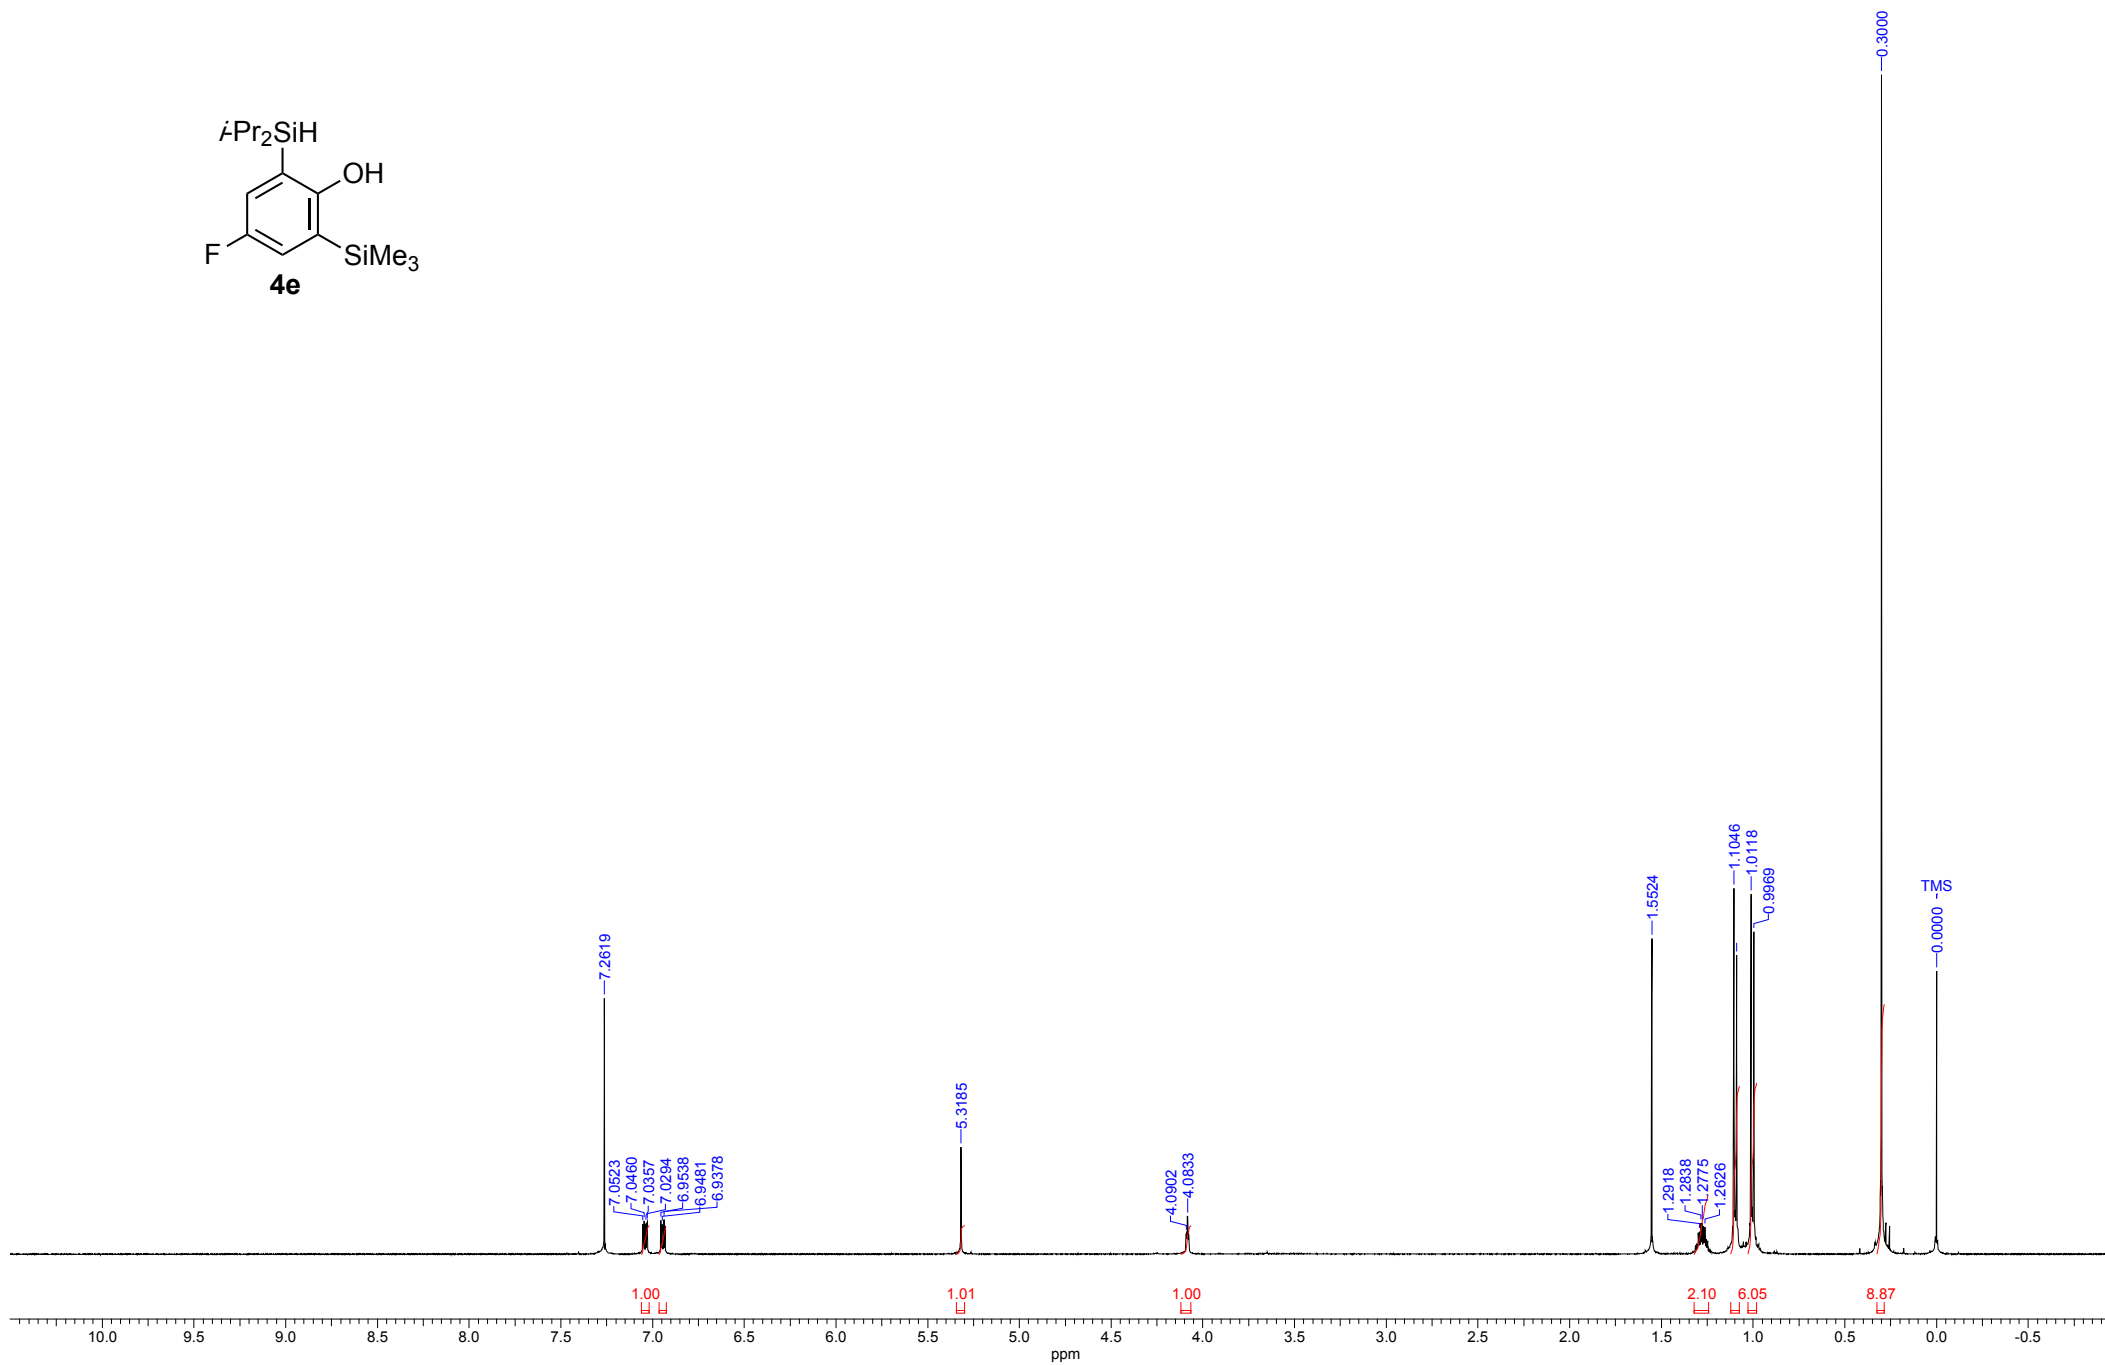

|                        |          |                        |                      |              |                                        |                 |                  |         |              |
|------------------------|----------|------------------------|----------------------|--------------|----------------------------------------|-----------------|------------------|---------|--------------|
| Acquisition Time (sec) | 0.8336   | Date                   | 28 Feb 2020 21:04:34 | File Name    | F:\NMR_CE_t_H\tawatar\TT0376-13C-1.als | Frequency (MHz) | 125.77           | Nucleus | 13C          |
| Number of Transients   | 128      | Original Points Count  | 26214                | Points Count | 26214                                  | Pulse Sequence  | single_pulse_dec | Solvent | CHLOROFORM-D |
| Sweep Width (Hz)       | 31446.06 | Temperature (degree C) | 20.300               |              |                                        |                 |                  |         |              |

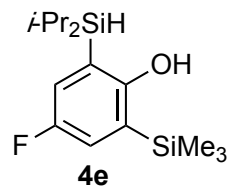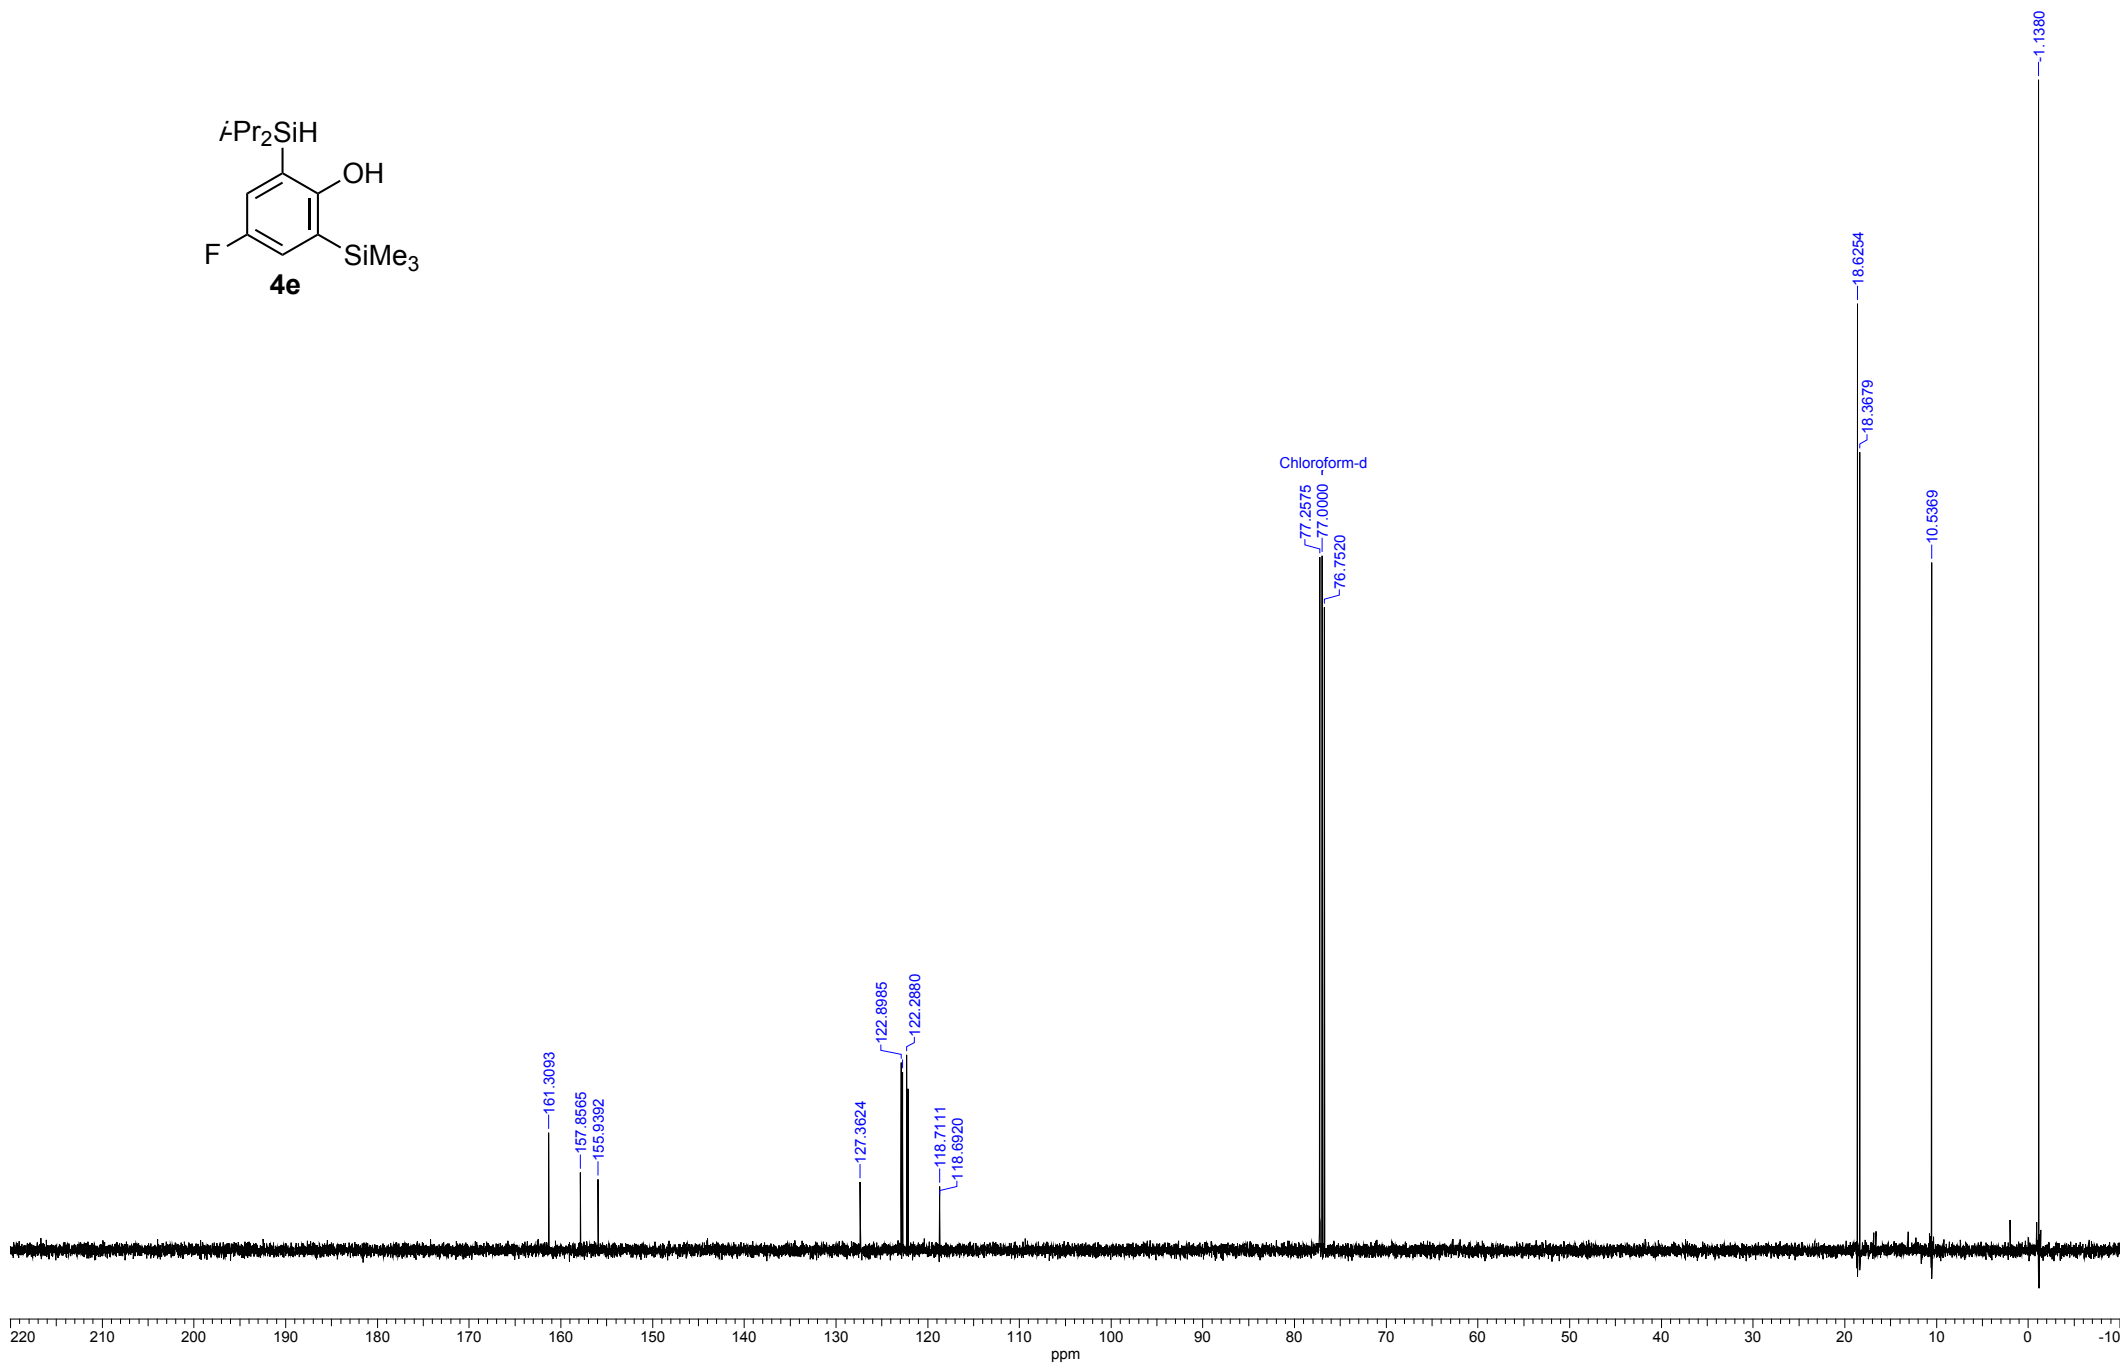

|                        |         |                        |                      |              |                                       |                 |                  |         |              |
|------------------------|---------|------------------------|----------------------|--------------|---------------------------------------|-----------------|------------------|---------|--------------|
| Acquisition Time (sec) | 3.4918  | Date                   | 07 Mar 2020 17:50:06 | File Name    | F:\NMR_CE_t_H\tawatar\TT0384-1H-1.als | Frequency (MHz) | 500.16           | Nucleus | 1H           |
| Number of Transients   | 8       | Original Points Count  | 26214                | Points Count | 26214                                 | Pulse Sequence  | single_pulse.ex2 | Solvent | CHLOROFORM-D |
| Sweep Width (Hz)       | 7507.39 | Temperature (degree C) | 18.900               |              |                                       |                 |                  |         |              |

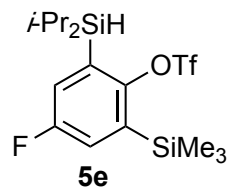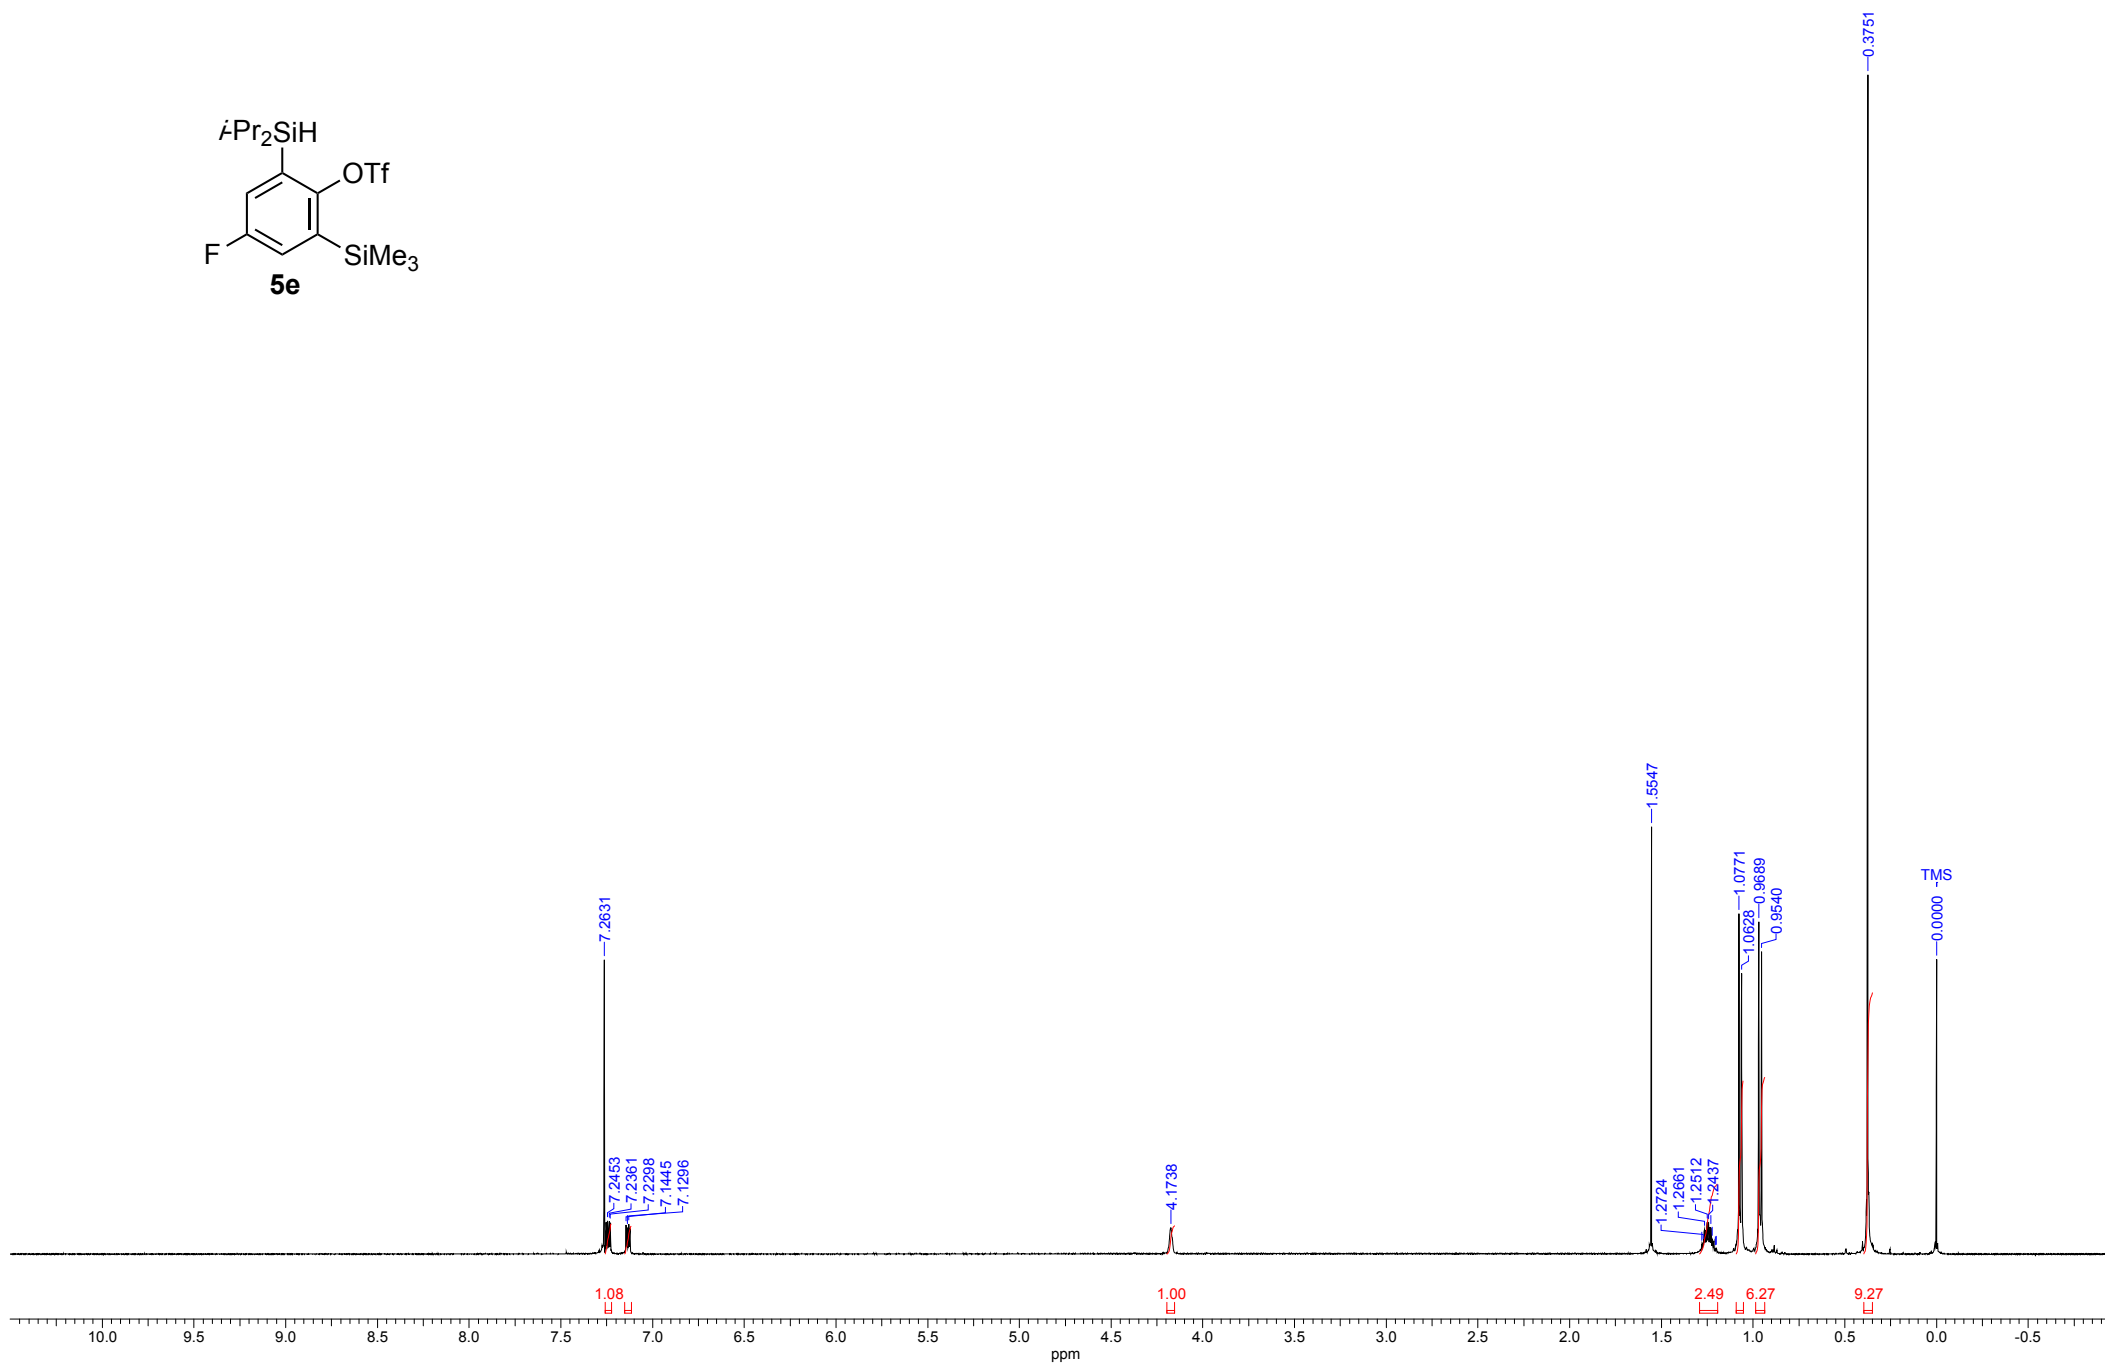

|                        |          |                        |                      |              |                                        |                 |                  |         |              |
|------------------------|----------|------------------------|----------------------|--------------|----------------------------------------|-----------------|------------------|---------|--------------|
| Acquisition Time (sec) | 0.8336   | Date                   | 07 Mar 2020 17:50:26 | File Name    | F:\NMR_CE_t_H\tawatar\TT0384-13C-1.als | Frequency (MHz) | 125.77           | Nucleus | 13C          |
| Number of Transients   | 256      | Original Points Count  | 26214                | Points Count | 26214                                  | Pulse Sequence  | single_pulse_dec | Solvent | CHLOROFORM-D |
| Sweep Width (Hz)       | 31446.06 | Temperature (degree C) | 19.200               |              |                                        |                 |                  |         |              |

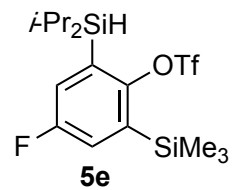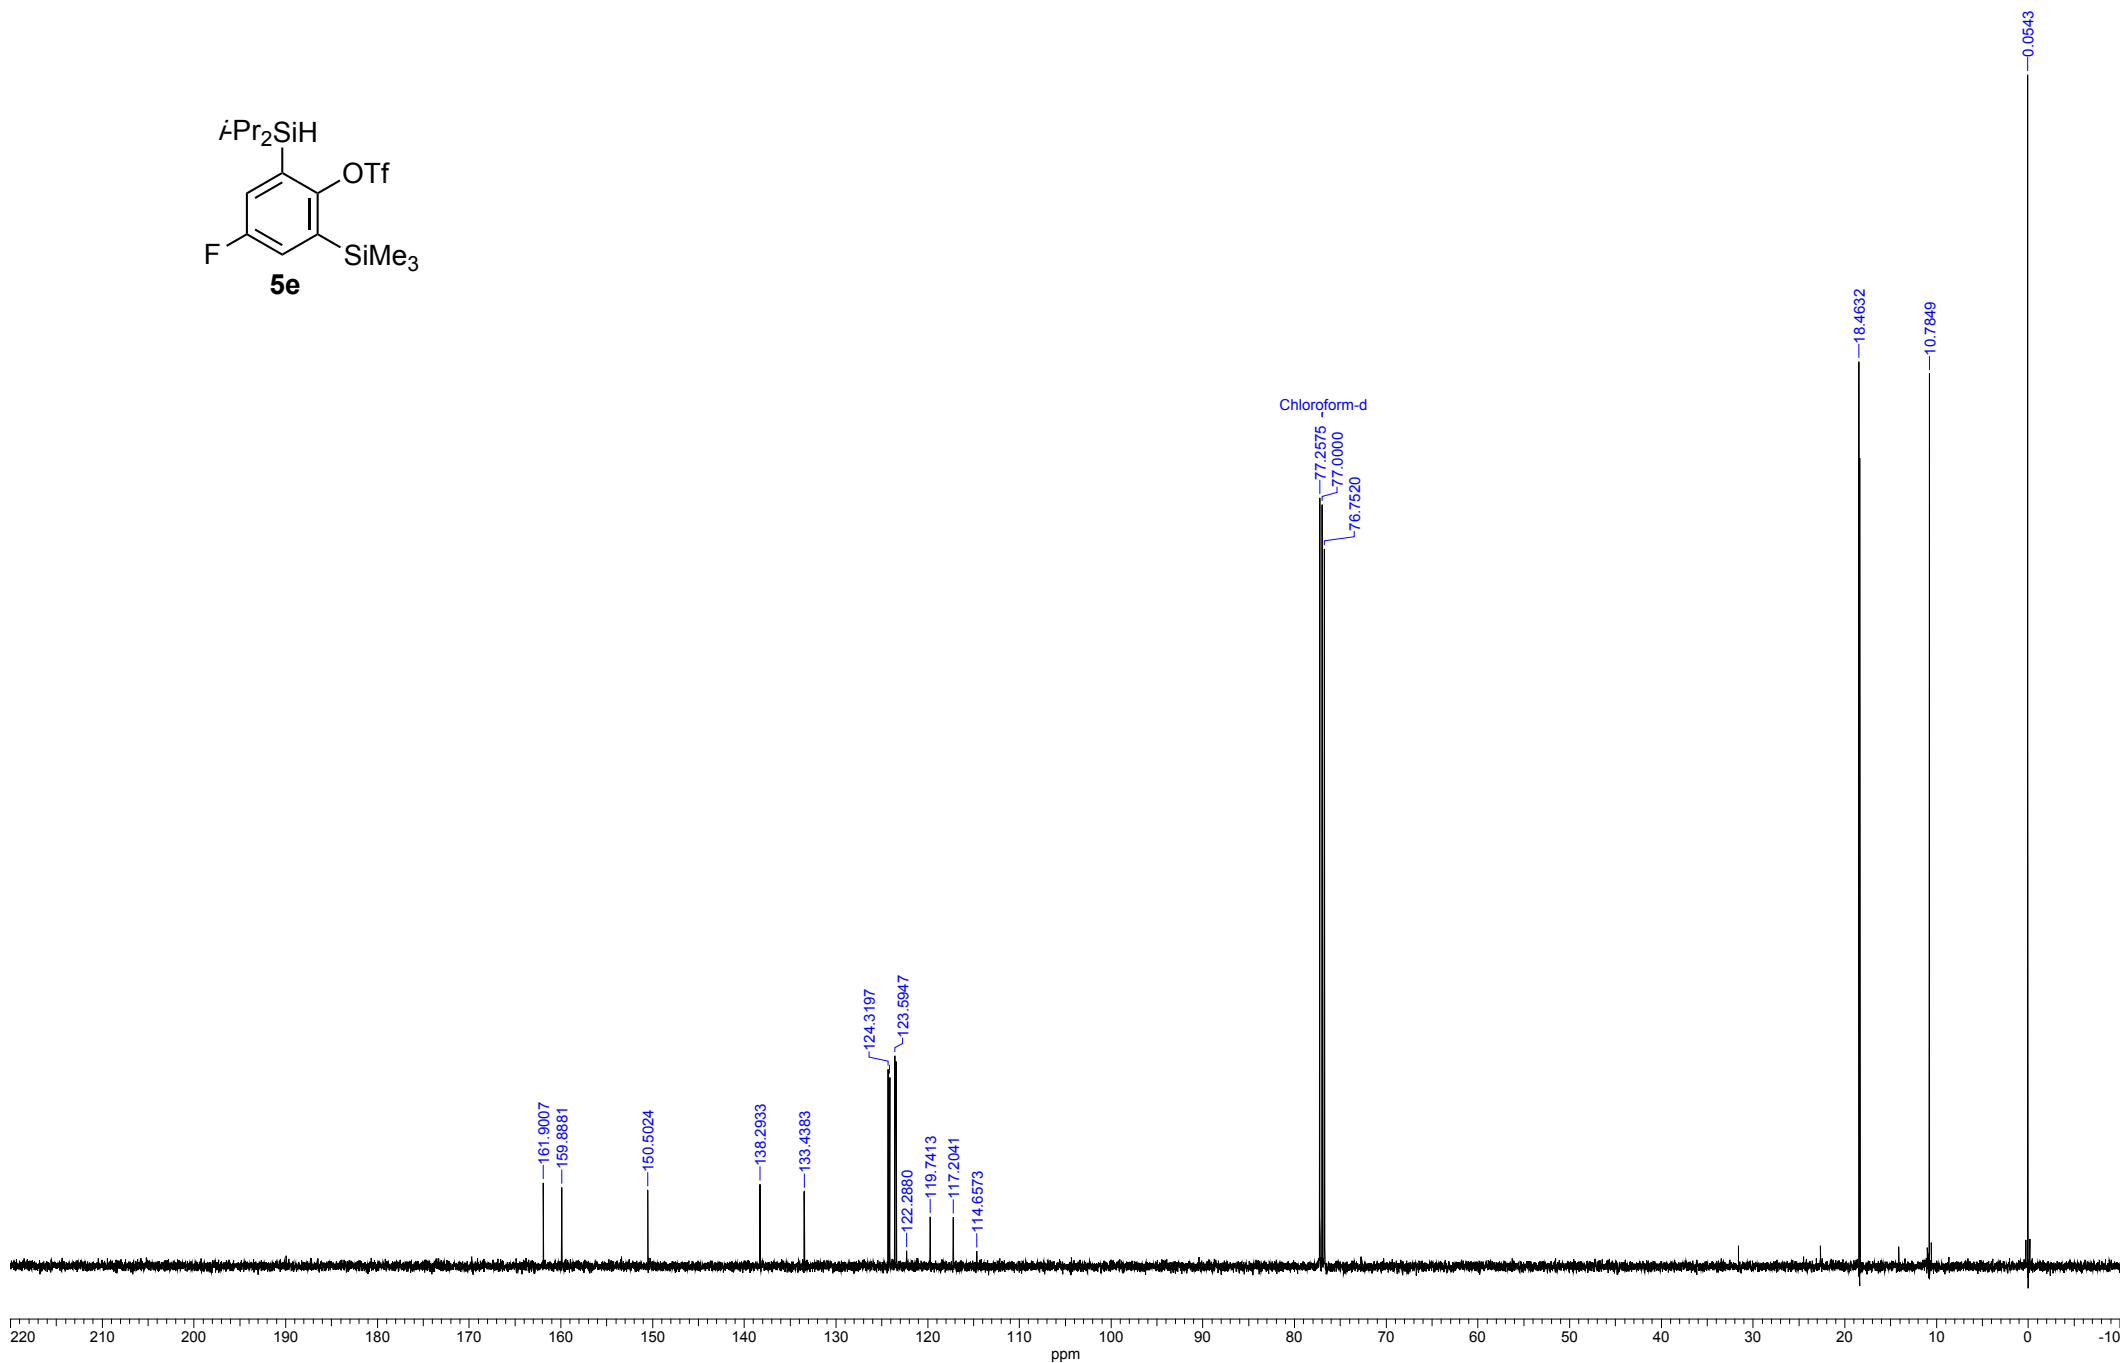

|                        |         |                        |              |                      |                      |                       |                                                  |
|------------------------|---------|------------------------|--------------|----------------------|----------------------|-----------------------|--------------------------------------------------|
| Acquisition Time (sec) | 1.8153  | Comment                | single pulse | Date                 | 22 Jun 2021 08:48:32 | File Name             | F:\NMR CE t H \tawatari\TT0562-1H_proton-1-1.als |
| Frequency (MHz)        | 600.17  | Nucleus                | 1H           | Number of Transients | 8                    | Original Points Count | 16384                                            |
| Sweep Width (Hz)       | 9025.27 | Temperature (degree C) | 21.500       | Points Count         | 13120                | Pulse Sequence        | proton.jxp                                       |
|                        |         |                        |              |                      |                      | Solvent               | CHLOROFORM-D                                     |

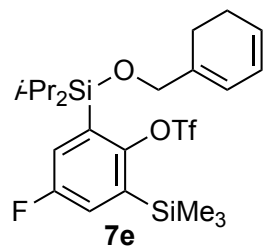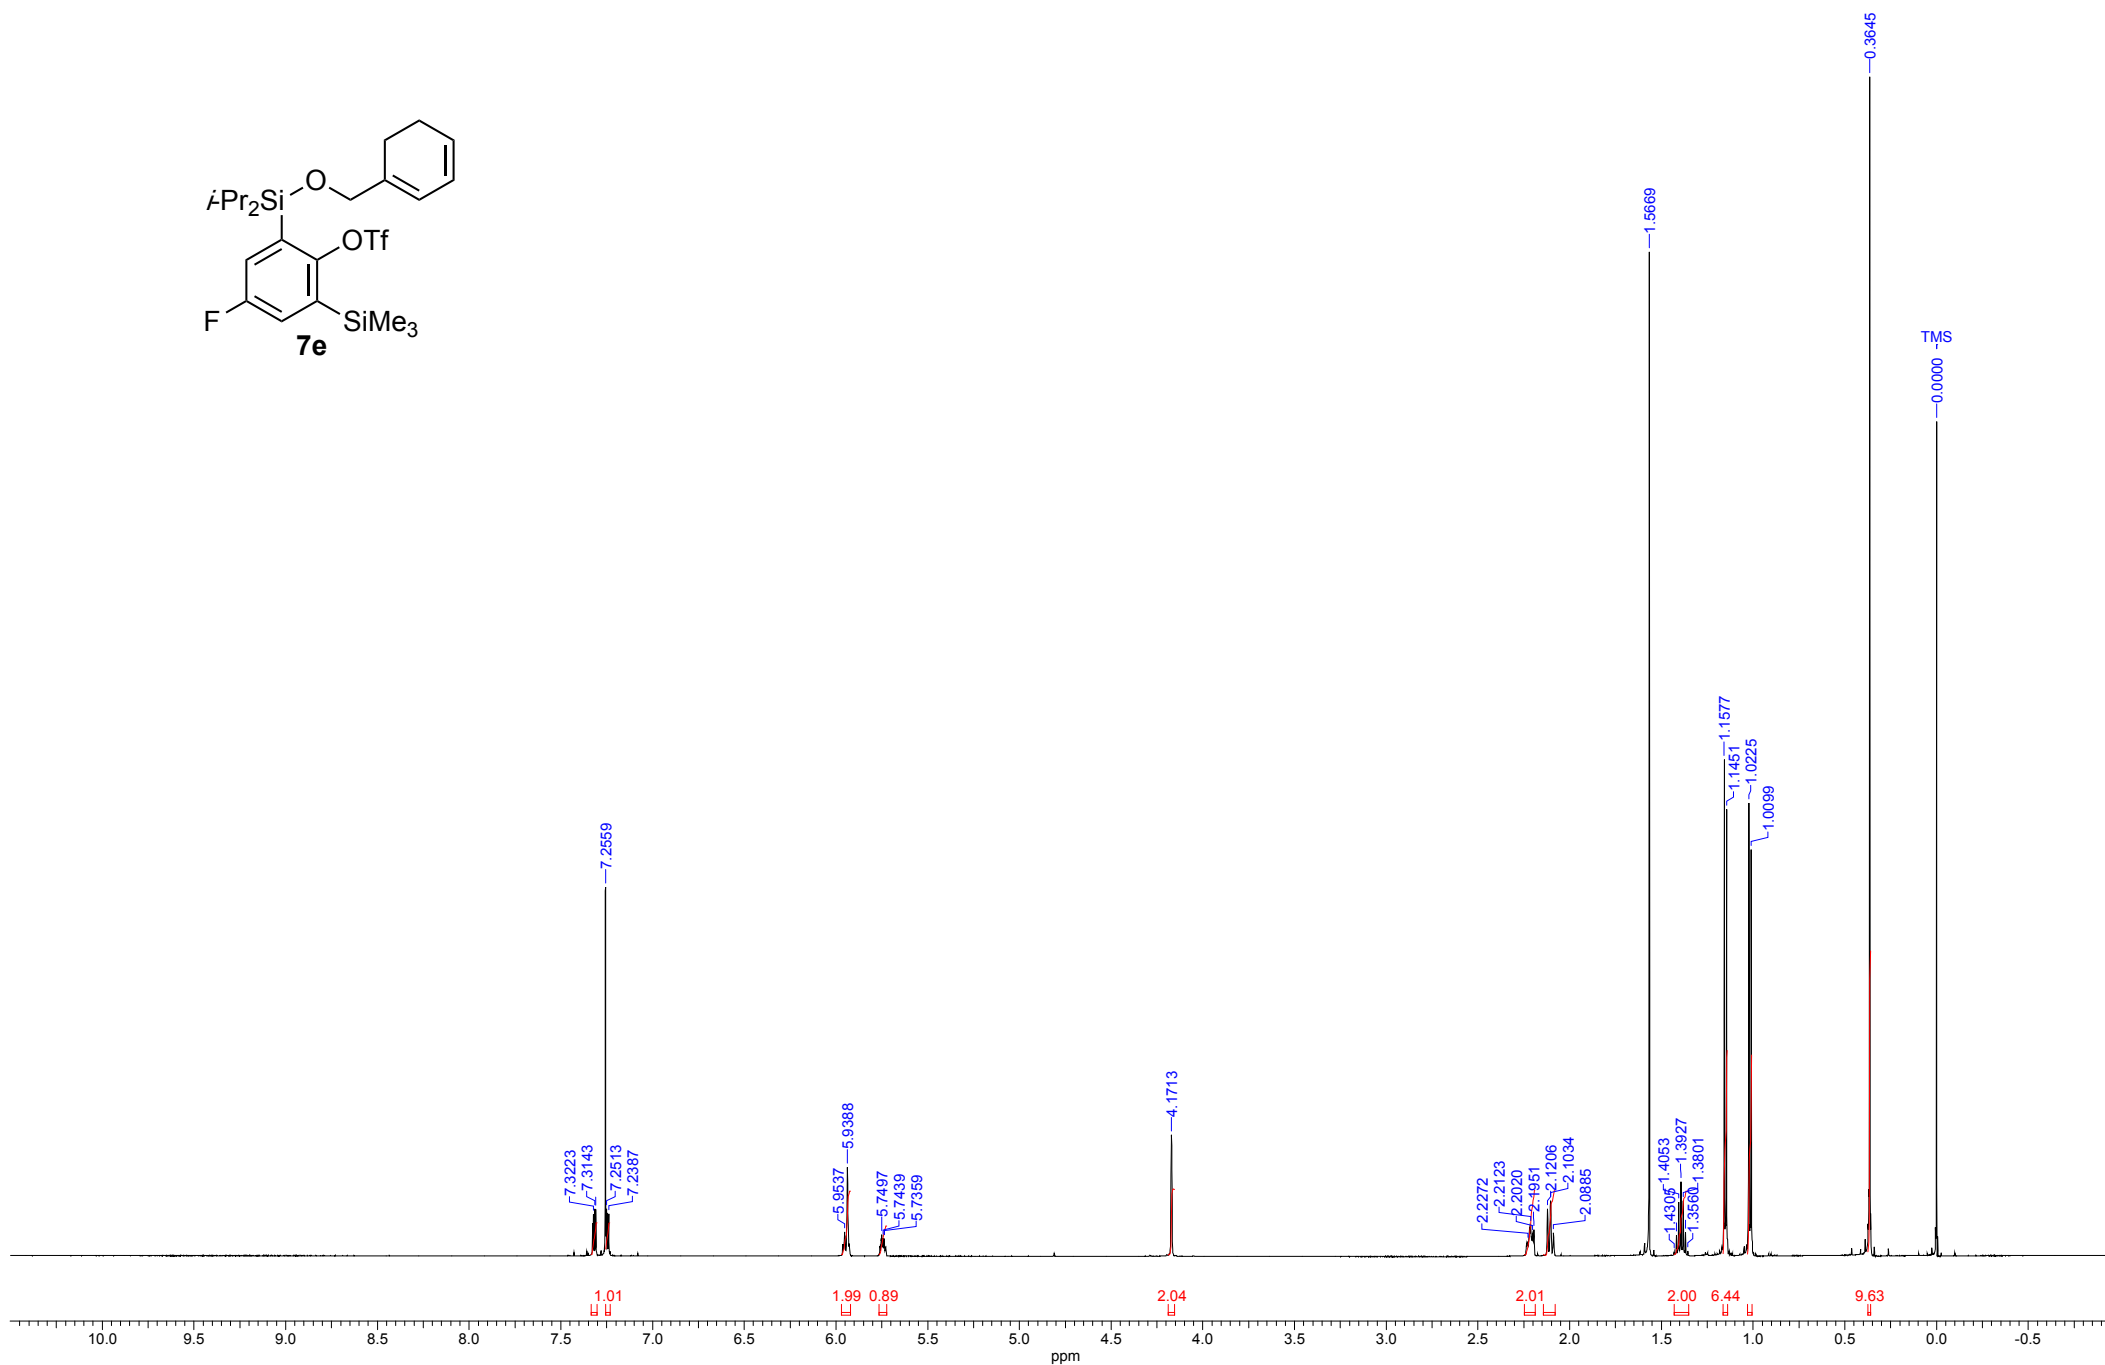

|                        |                                                      |                 |                                  |                        |                      |
|------------------------|------------------------------------------------------|-----------------|----------------------------------|------------------------|----------------------|
| Acquisition Time (sec) | 0.6921                                               | Comment         | single pulse decoupled gated NOE | Date                   | 12 Sep 2020 17:23:24 |
| File Name              | F:\NMR CE t H \tawatar\TT0562-13Cretake carbon-1.als | Frequency (MHz) | 150.00                           | Number of Transients   | 254                  |
| Pulse Sequence         | carbon_cool.xp                                       | Solvent         | CHLOROFORM-D                     | Original Points Count  | 26214                |
|                        |                                                      |                 |                                  | Sweep Width (Hz)       | 37876.77             |
|                        |                                                      |                 |                                  | Temperature (degree C) | 21.600               |
|                        |                                                      |                 |                                  | Points Count           | 26214                |

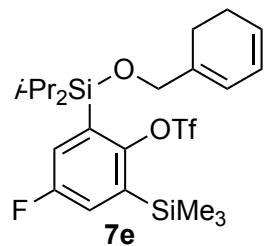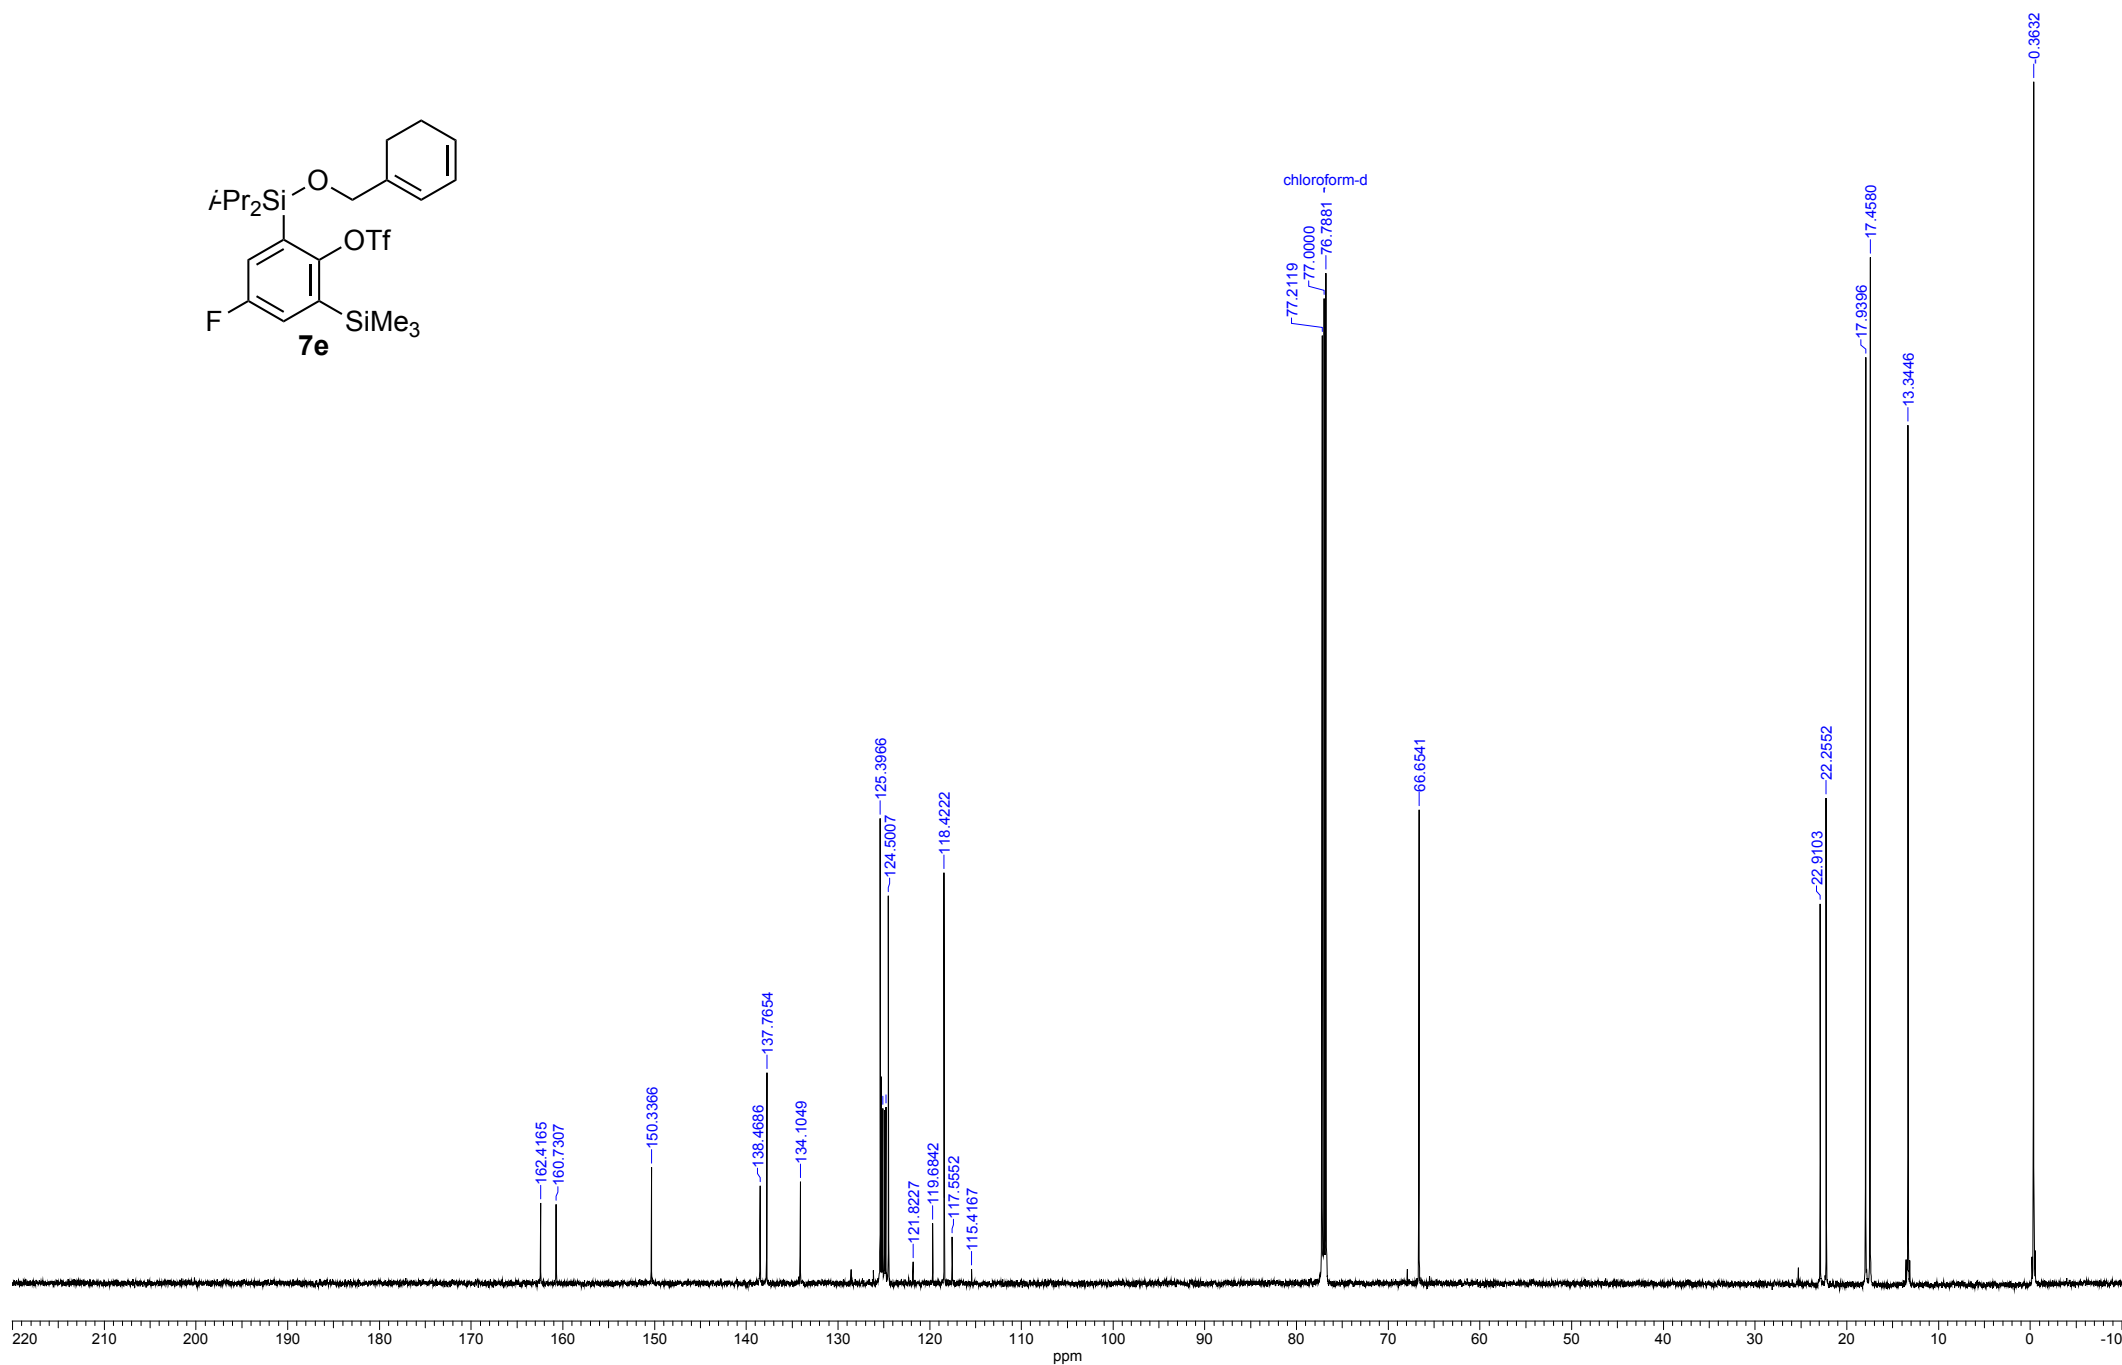

|                        |         |                        |                      |              |                                       |                 |                  |         |              |
|------------------------|---------|------------------------|----------------------|--------------|---------------------------------------|-----------------|------------------|---------|--------------|
| Acquisition Time (sec) | 3.4918  | Date                   | 23 Oct 2020 23:29:38 | File Name    | F:\NMR_CE_t_H\tawatar\TT0627-1H-1.als | Frequency (MHz) | 500.16           | Nucleus | 1H           |
| Number of Transients   | 8       | Original Points Count  | 26214                | Points Count | 26214                                 | Pulse Sequence  | single_pulse.ex2 | Solvent | CHLOROFORM-D |
| Sweep Width (Hz)       | 7507.39 | Temperature (degree C) | 20.900               |              |                                       |                 |                  |         |              |

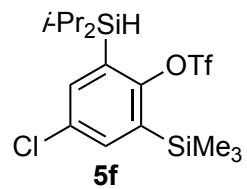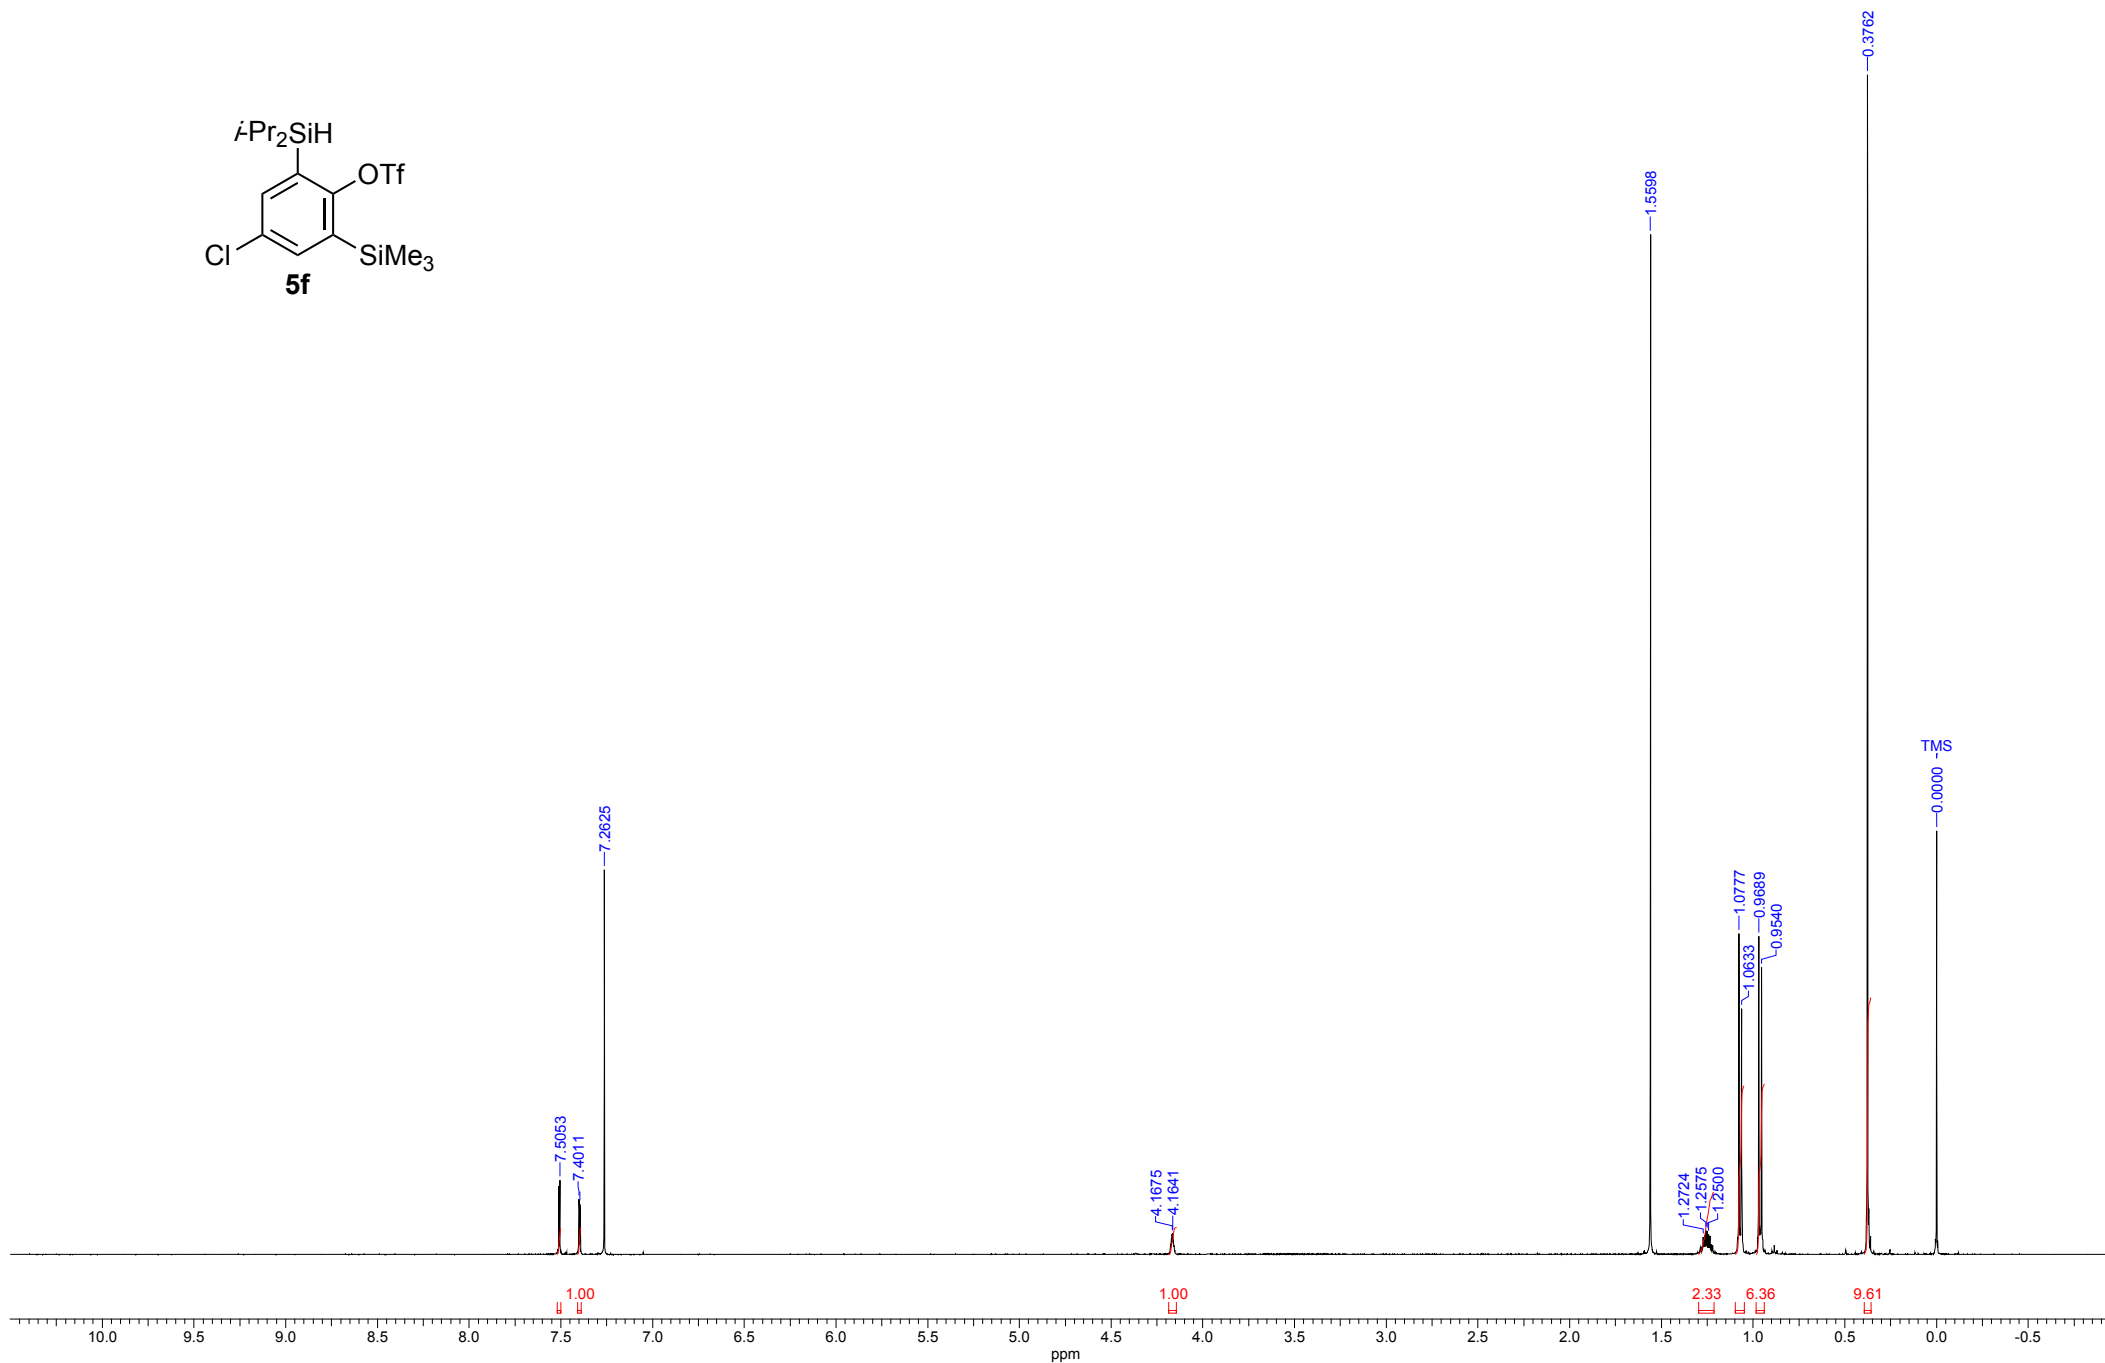



|                        |          |                        |                      |              |                                          |                 |                  |         |              |
|------------------------|----------|------------------------|----------------------|--------------|------------------------------------------|-----------------|------------------|---------|--------------|
| Acquisition Time (sec) | 0.8336   | Date                   | 23 Oct 2020 23:29:50 | File Name    | F:\NMR CE t H \tawatari\TT0627-13C-1.als | Frequency (MHz) | 125.77           | Nucleus | 13C          |
| Number of Transients   | 256      | Original Points Count  | 26214                | Points Count | 26214                                    | Pulse Sequence  | single_pulse_dec | Solvent | CHLOROFORM-D |
| Sweep Width (Hz)       | 31446.06 | Temperature (degree C) | 20.900               |              |                                          |                 |                  |         |              |

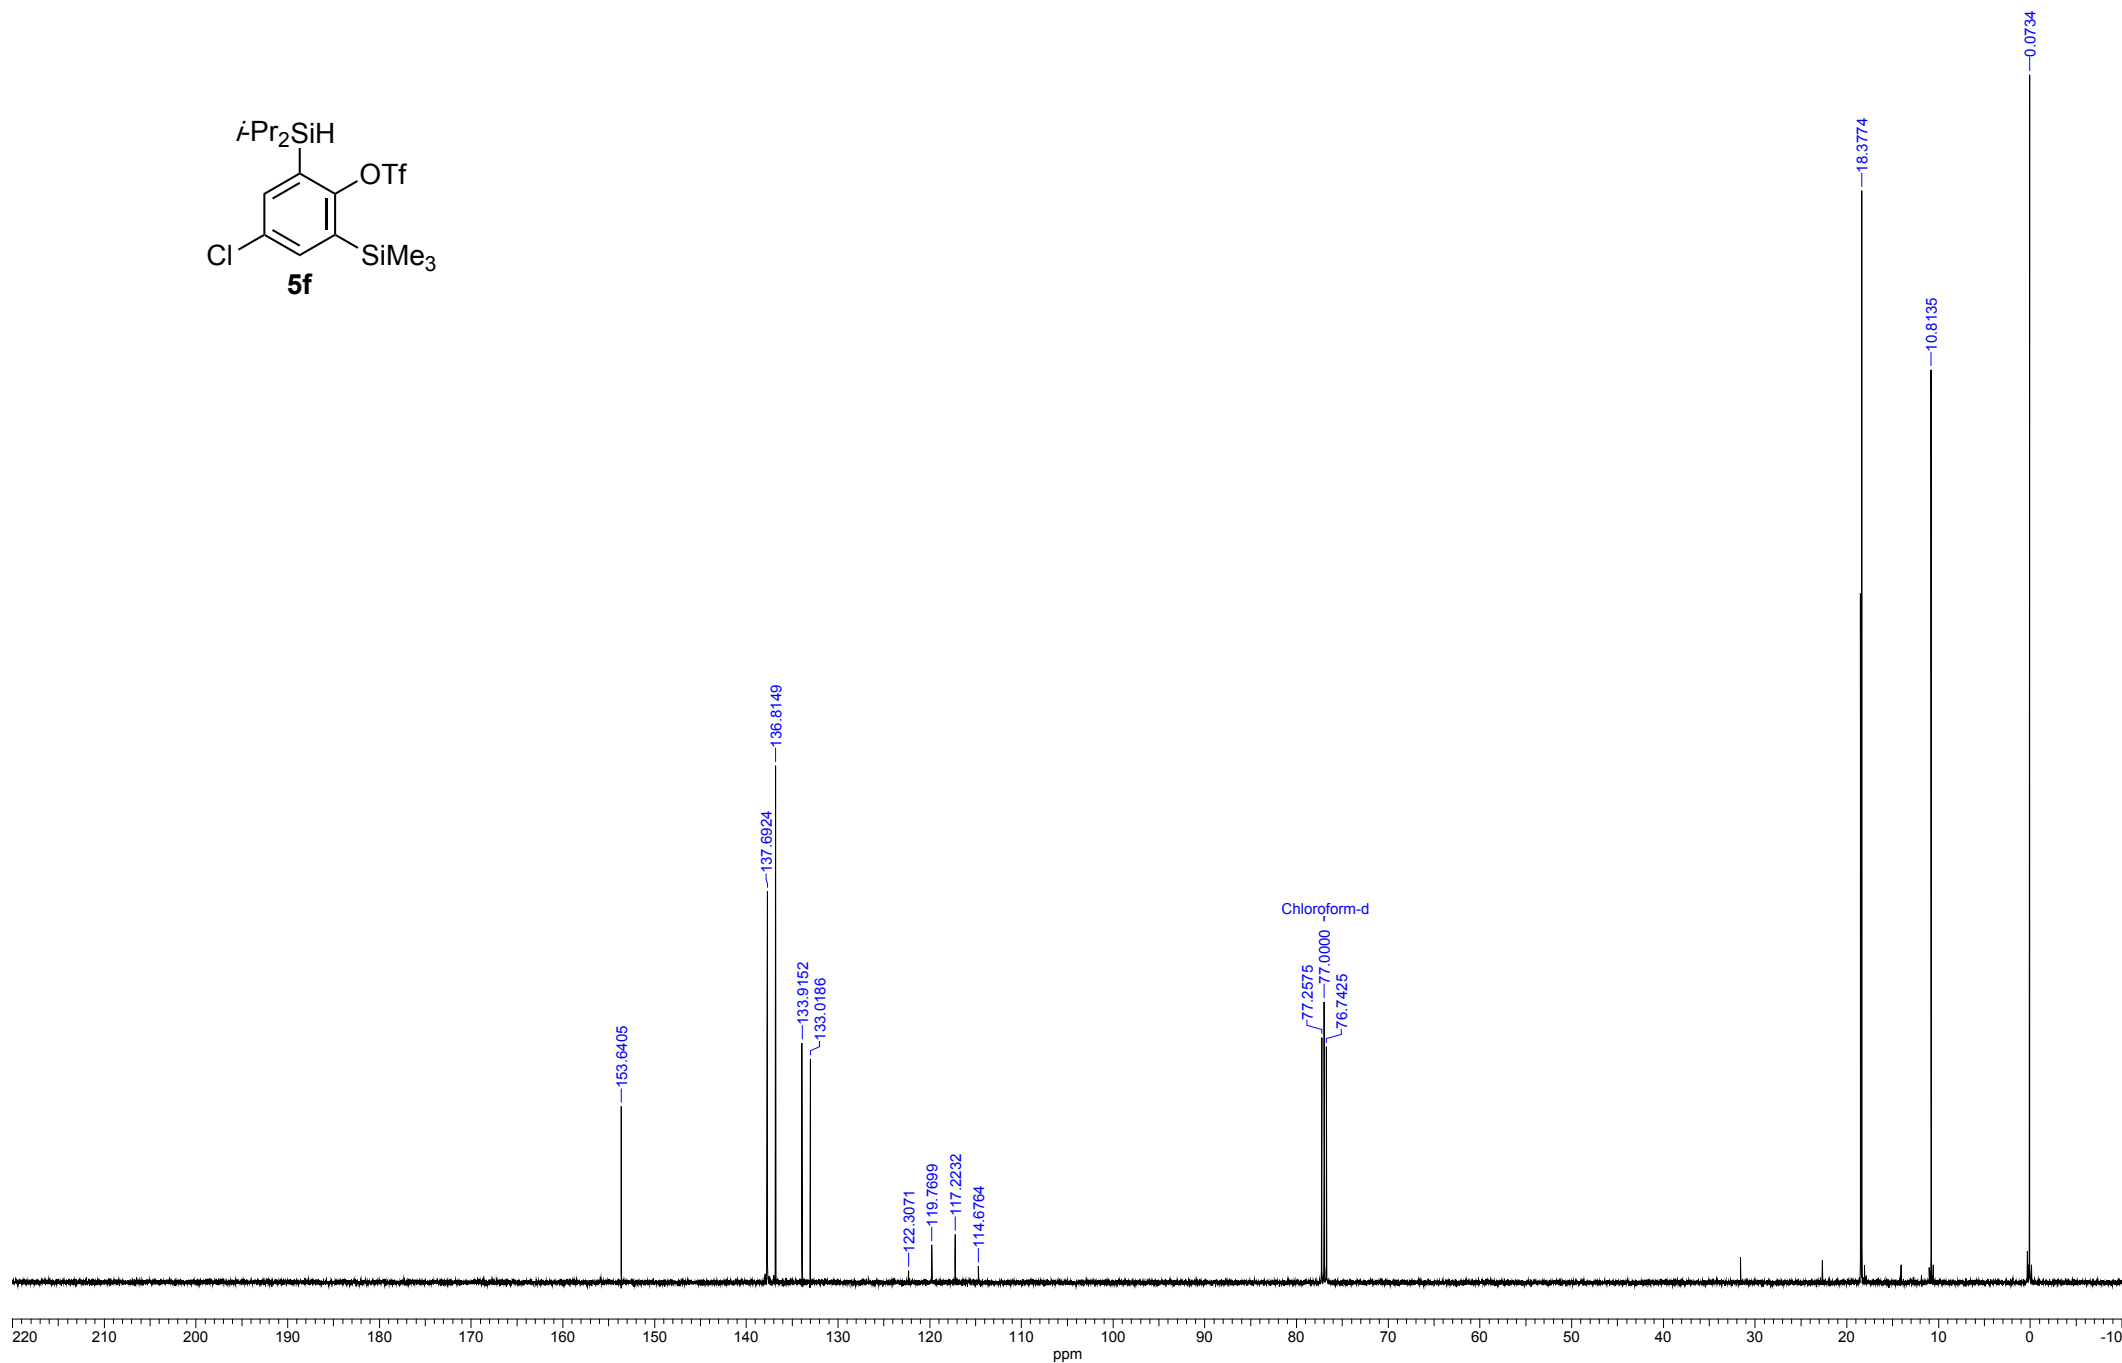

|                        |         |                        |              |                      |                      |                       |                                                  |              |
|------------------------|---------|------------------------|--------------|----------------------|----------------------|-----------------------|--------------------------------------------------|--------------|
| Acquisition Time (sec) | 1.8153  | Comment                | single pulse | Date                 | 16 Jan 2021 15:07:08 | File Name             | F:\NMR CE t H \tawatari\TT0689-1H_proton-1-1.als |              |
| Frequency (MHz)        | 600.17  | Nucleus                | 1H           | Number of Transients | 8                    | Original Points Count | 16384                                            |              |
| Sweep Width (Hz)       | 9025.27 | Temperature (degree C) | 19.300       | Points Count         | 13120                | Pulse Sequence        | proton.jxp                                       |              |
|                        |         |                        |              |                      |                      |                       | Solvent                                          | CHLOROFORM-D |

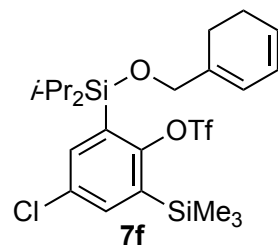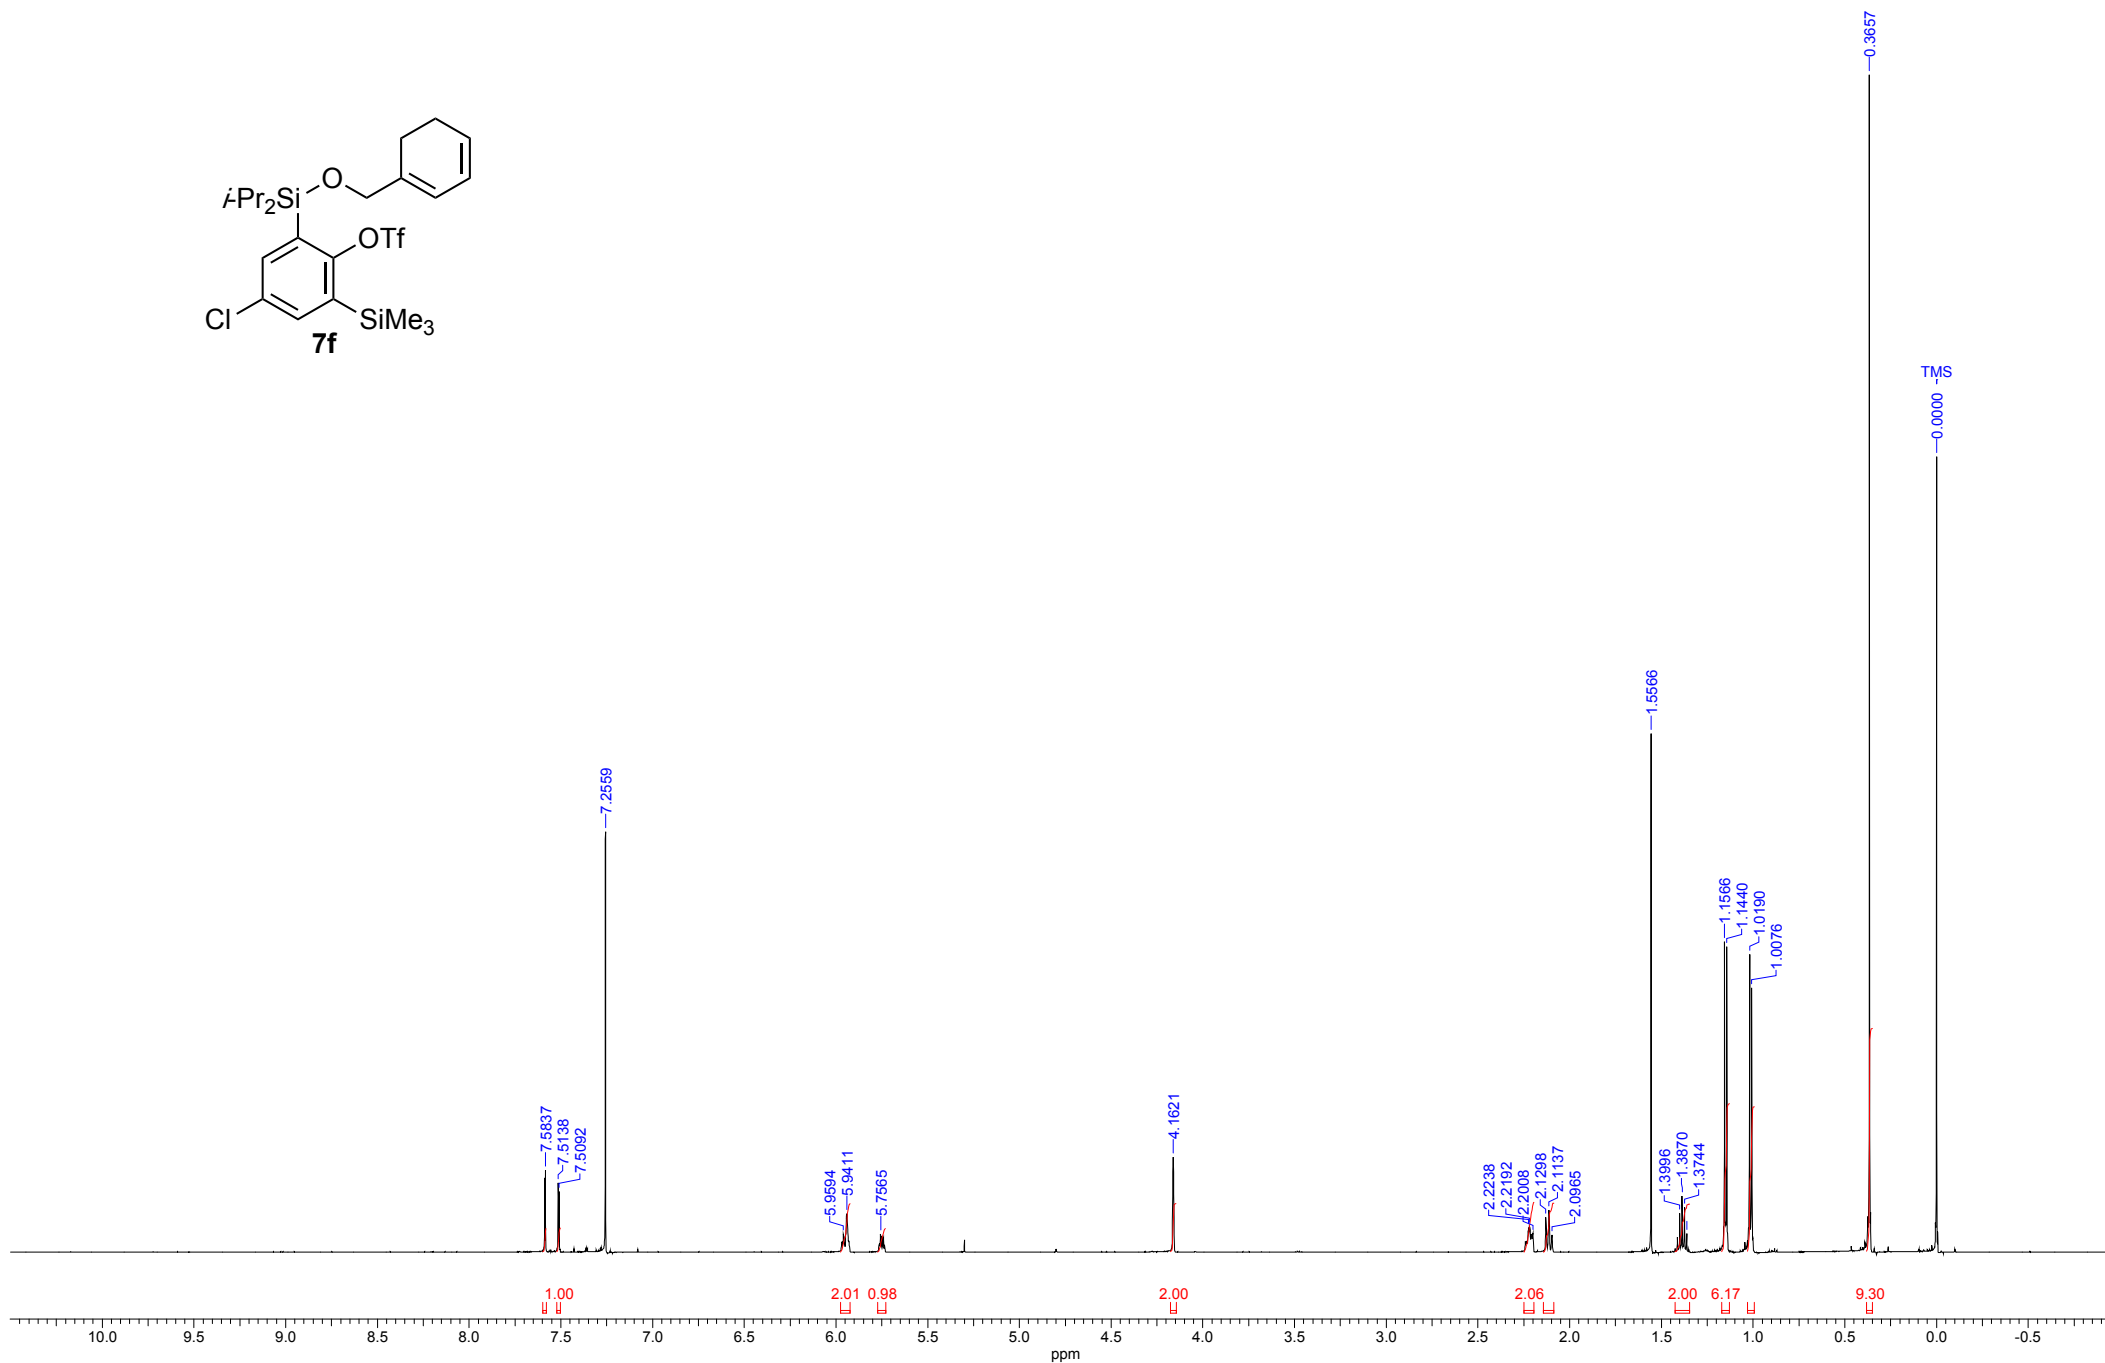

|                        |          |                        |                                  |                       |                      |              |                                                |
|------------------------|----------|------------------------|----------------------------------|-----------------------|----------------------|--------------|------------------------------------------------|
| Acquisition Time (sec) | 0.6921   | Comment                | single pulse decoupled gated NOE | Date                  | 16 Jan 2021 15:06:46 | File Name    | F:\NMR_CE t H \tawatari\T0689-13C carbon-1.als |
| Frequency (MHz)        | 150.00   | Number of Transients   | 400                              | Original Points Count | 26214                | Points Count | 26214                                          |
| Sweep Width (Hz)       | 37876.77 | Temperature (degree C) | 19.400                           | Pulse Sequence        | carbon_cool.jxp      | Solvent      | CHLOROFORM-D                                   |

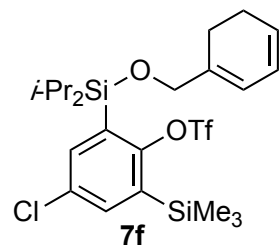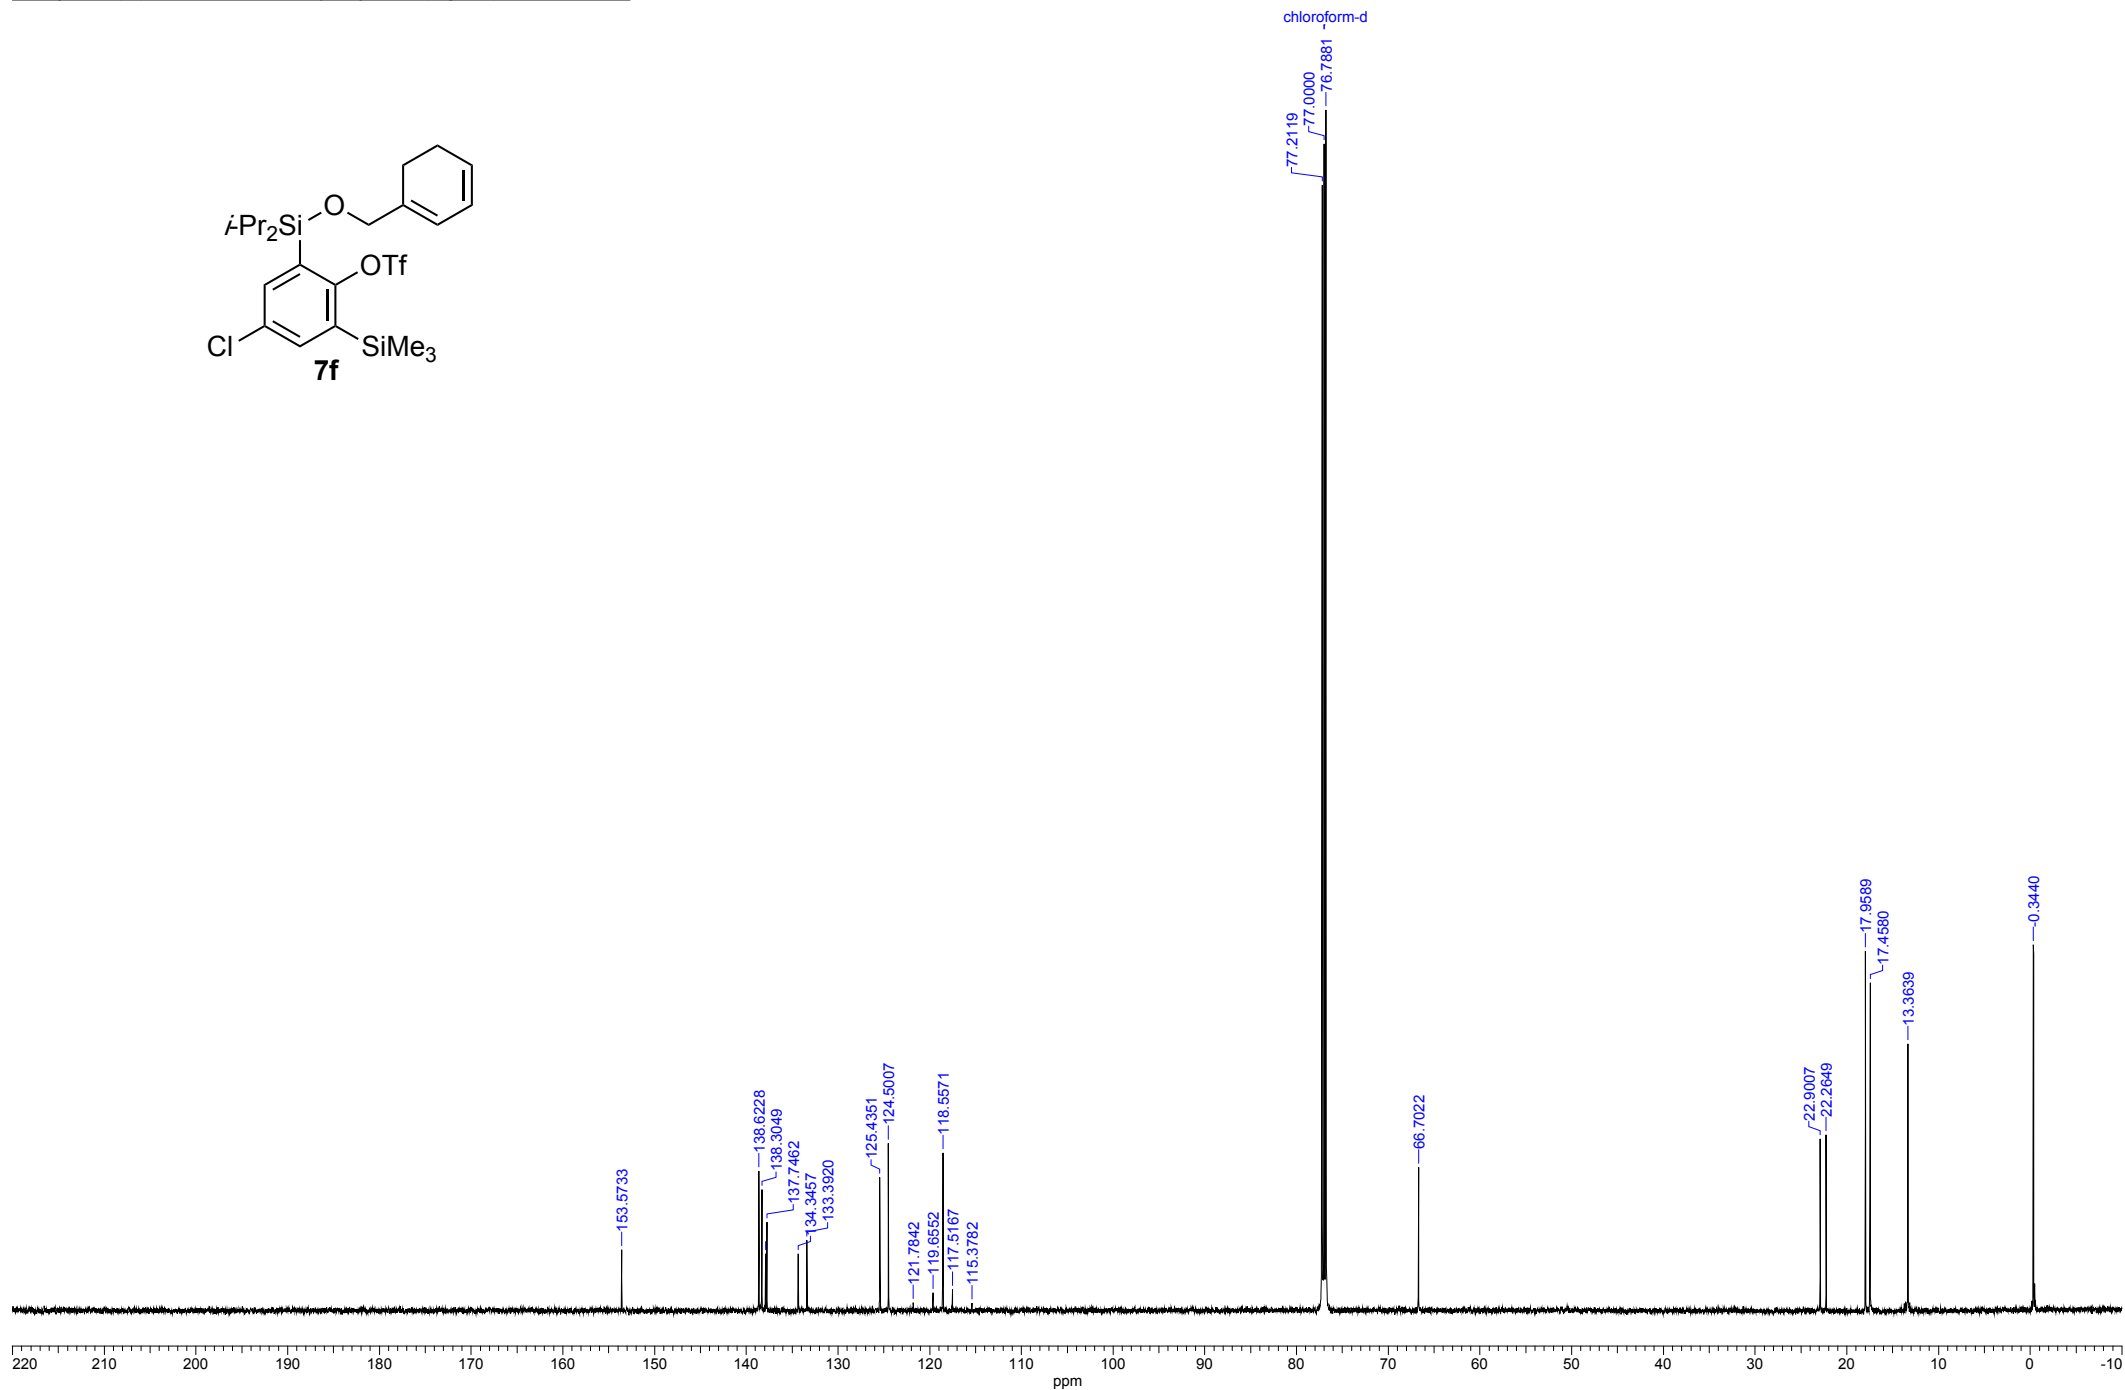

|                        |         |                        |                      |              |                                            |                 |                  |         |              |
|------------------------|---------|------------------------|----------------------|--------------|--------------------------------------------|-----------------|------------------|---------|--------------|
| Acquisition Time (sec) | 3.4918  | Date                   | 23 Sep 2020 21:20:26 | File Name    | F:\NMR_CE_t_H\tawarani\TT0588column2-1.als | Frequency (MHz) | 500.16           | Nucleus | 1H           |
| Number of Transients   | 8       | Original Points Count  | 26214                | Points Count | 26214                                      | Pulse Sequence  | single_pulse.ex2 | Solvent | CHLOROFORM-D |
| Sweep Width (Hz)       | 7507.39 | Temperature (degree C) | 18.600               |              |                                            |                 |                  |         |              |

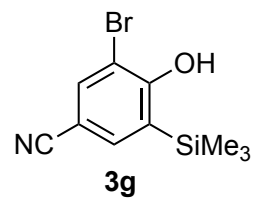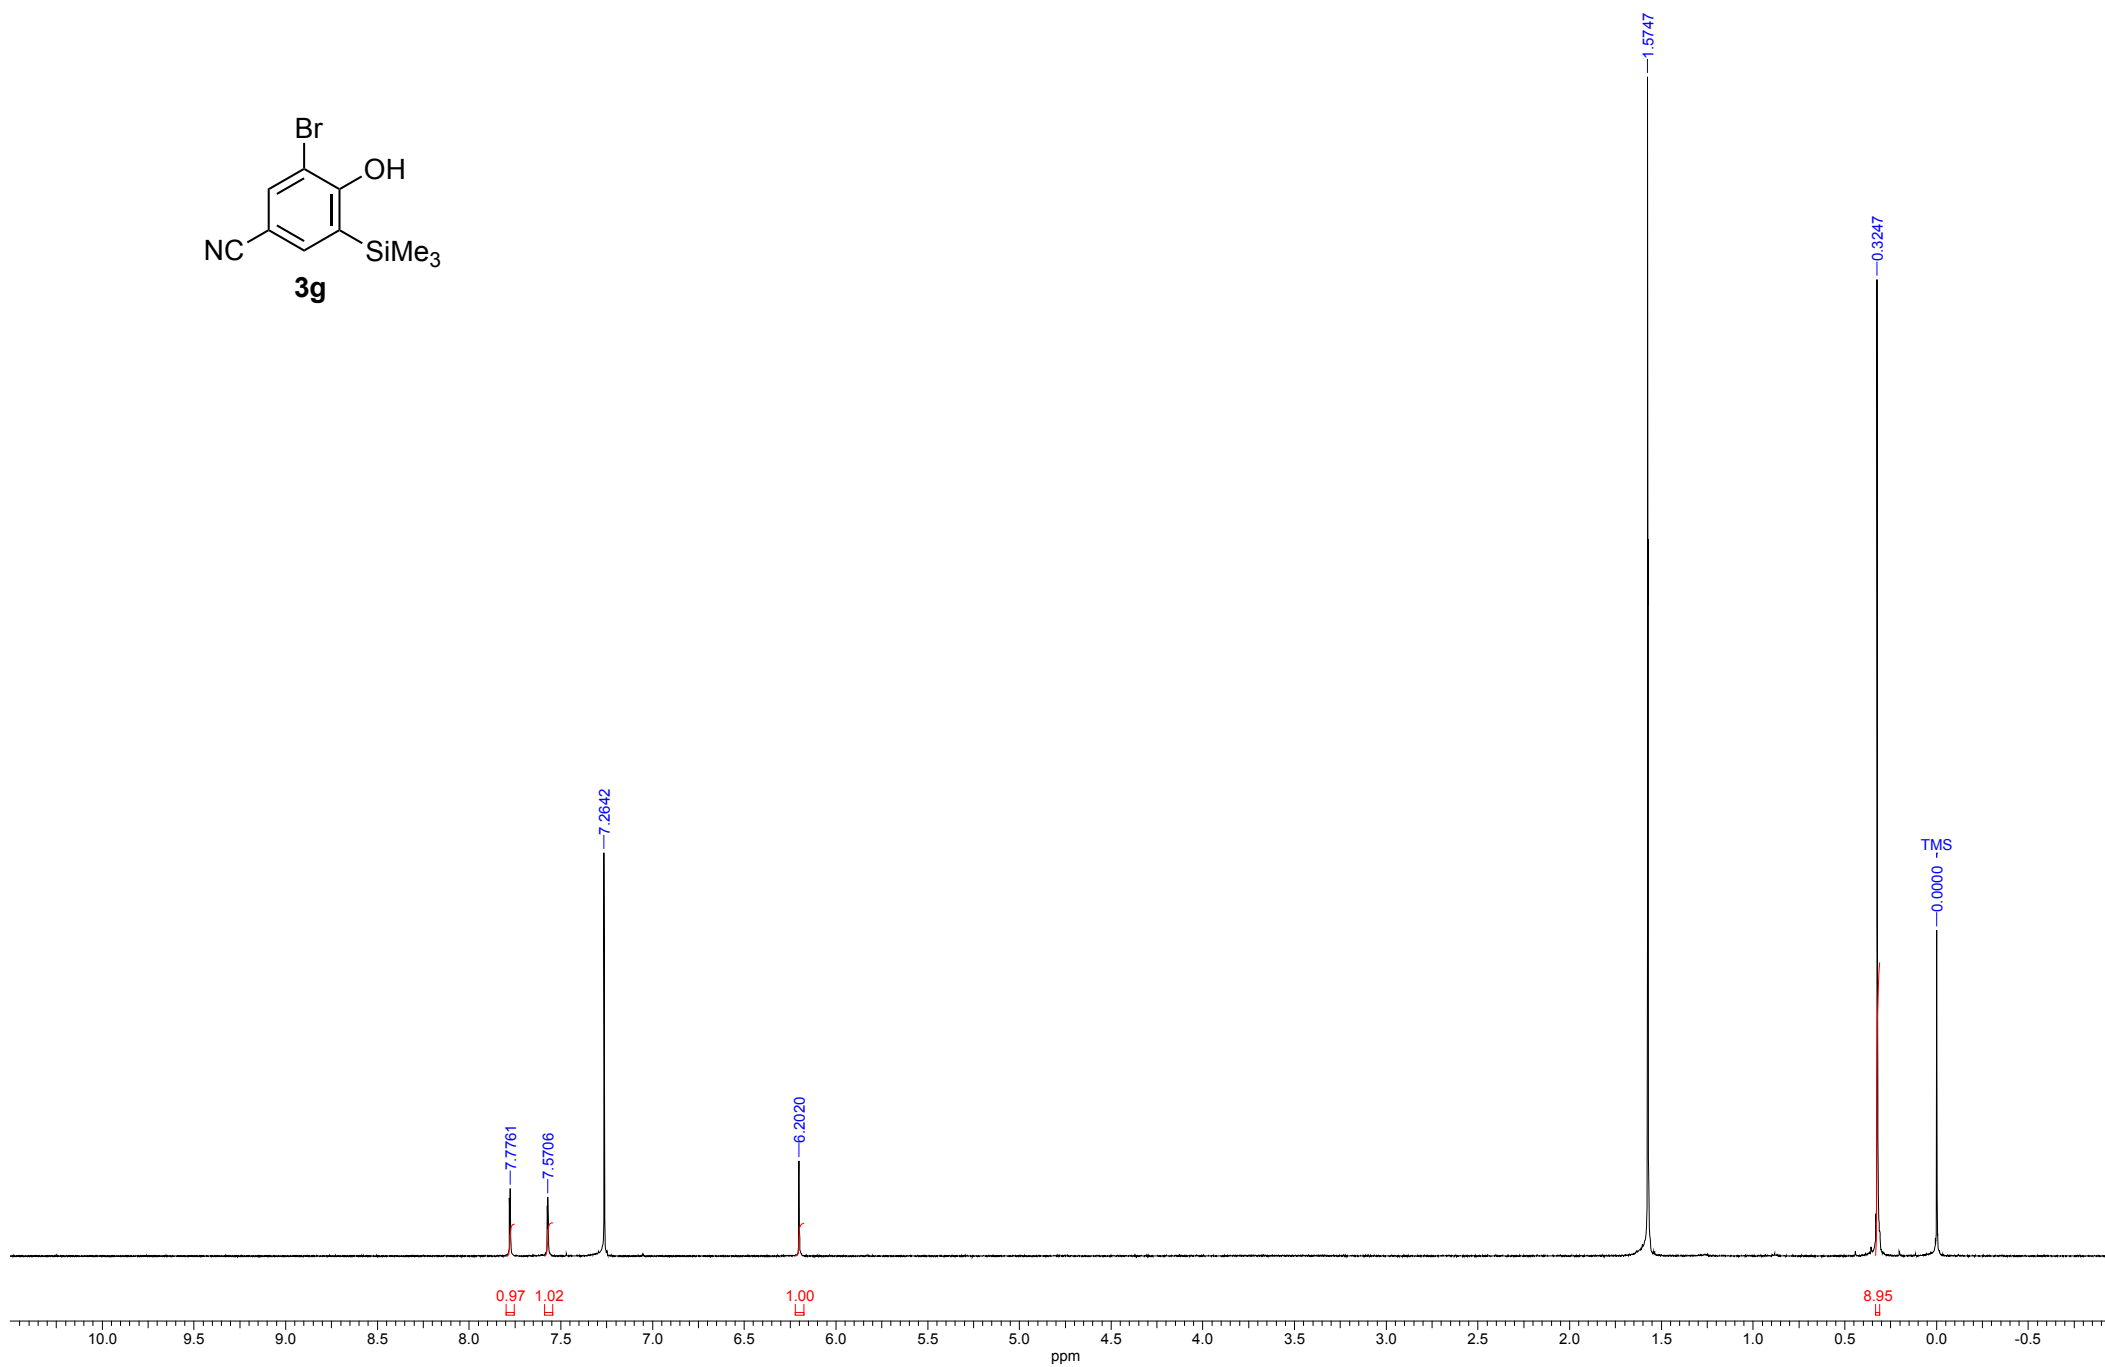

|                        |          |                        |                      |              |                                         |                 |                  |         |              |
|------------------------|----------|------------------------|----------------------|--------------|-----------------------------------------|-----------------|------------------|---------|--------------|
| Acquisition Time (sec) | 0.8336   | Date                   | 04 Dec 2020 21:50:36 | File Name    | F:\NMR_CE_t_H\tawatari\TT0588-13C-1.als | Frequency (MHz) | 125.77           | Nucleus | 13C          |
| Number of Transients   | 256      | Original Points Count  | 26214                | Points Count | 26214                                   | Pulse Sequence  | single_pulse_dec | Solvent | CHLOROFORM-D |
| Sweep Width (Hz)       | 31446.06 | Temperature (degree C) | 20.900               |              |                                         |                 |                  |         |              |

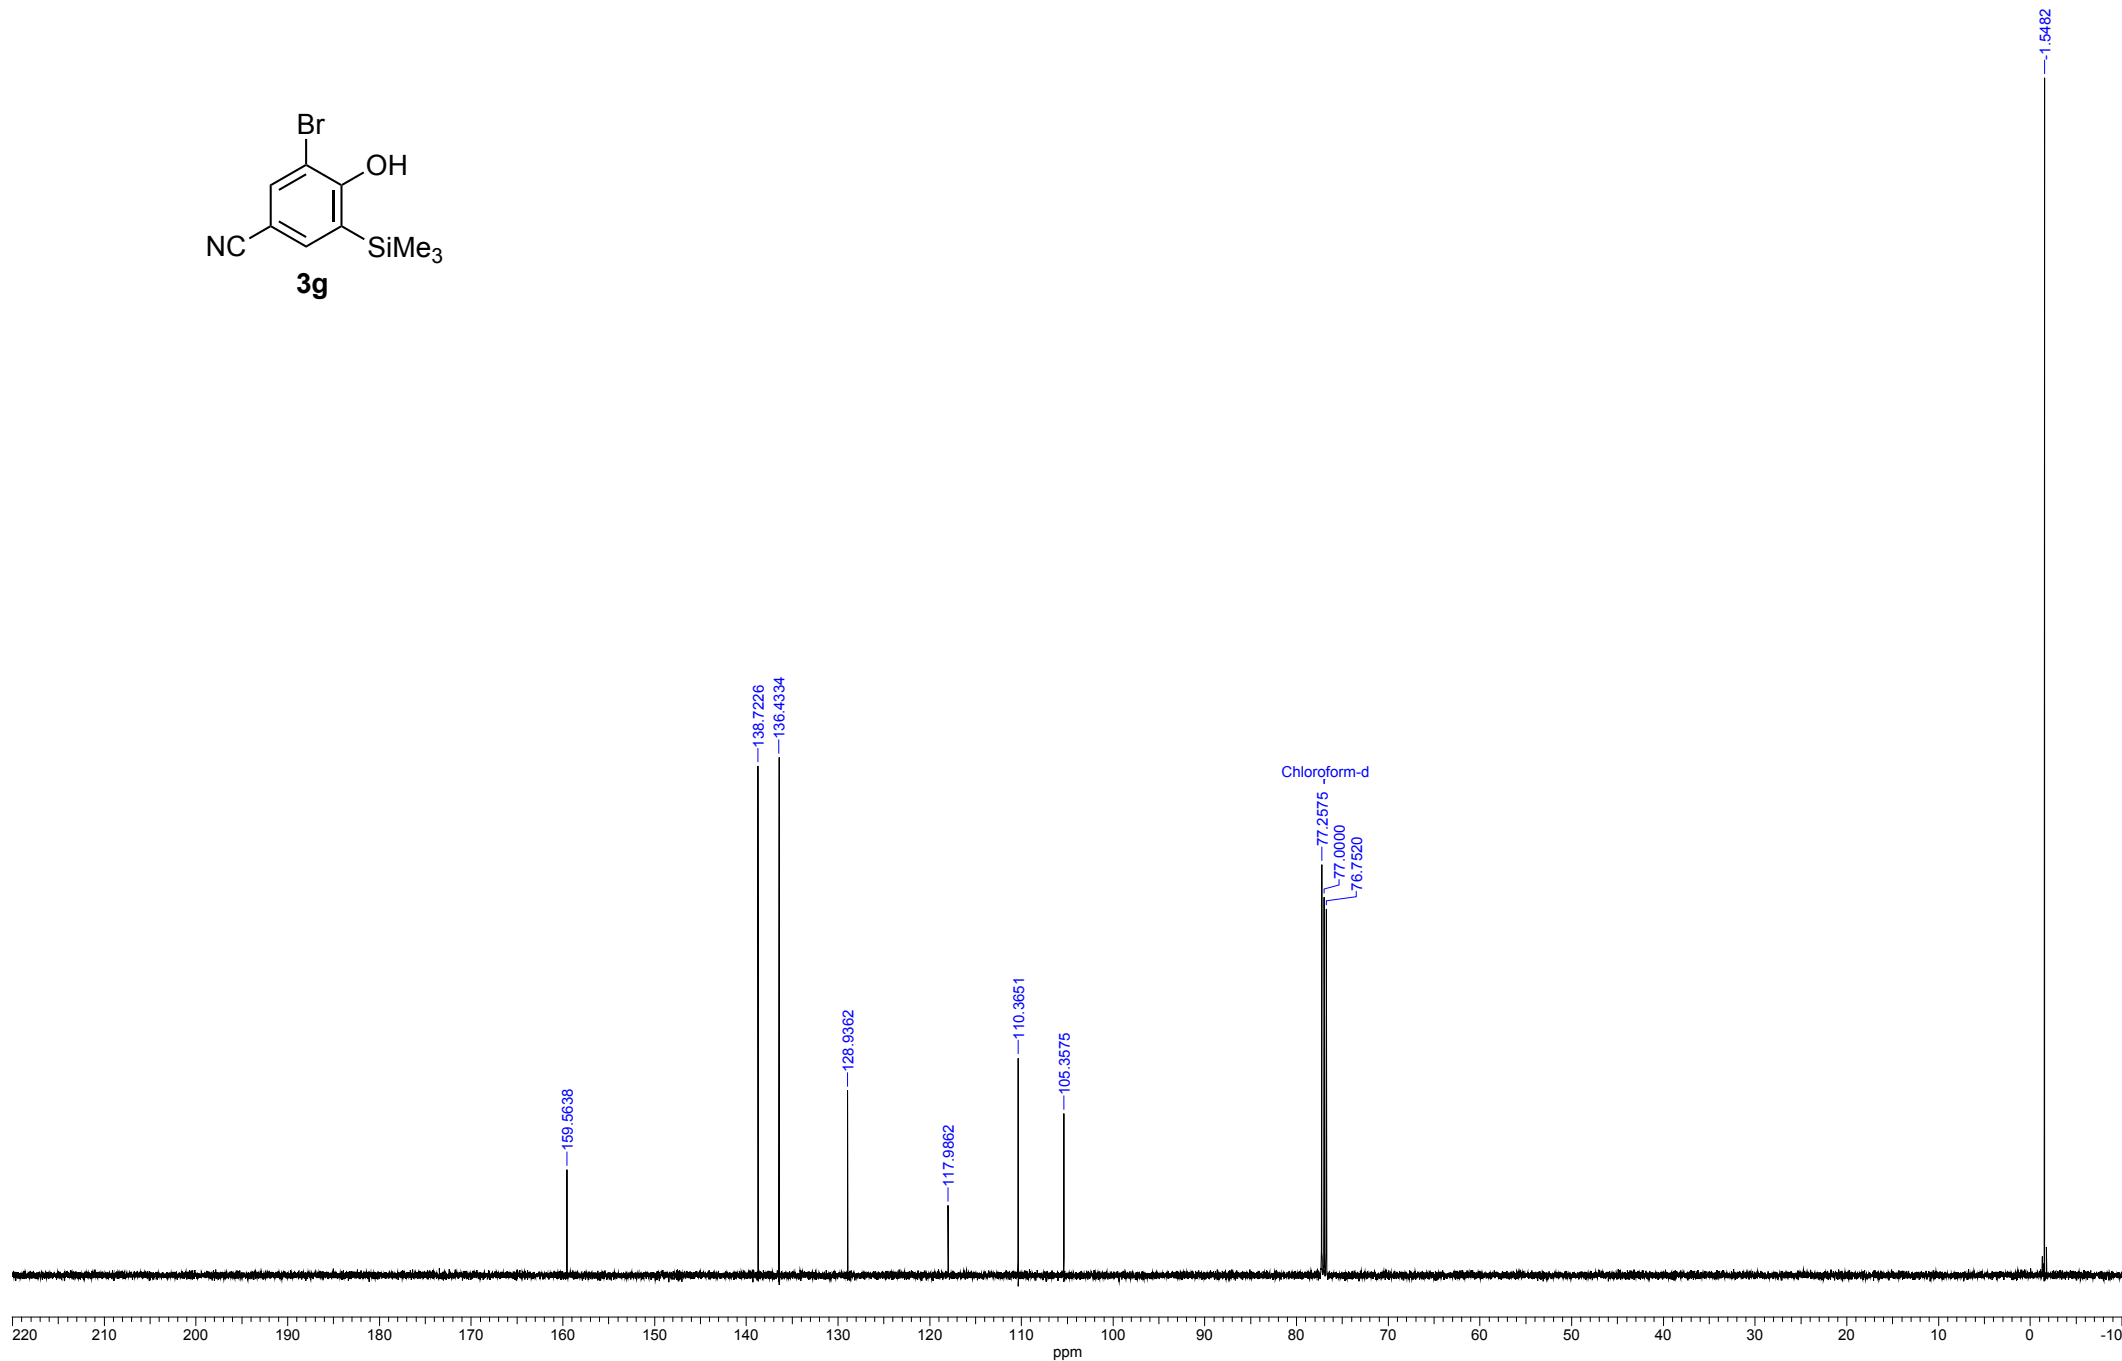

|                        |         |                        |                      |              |                                        |                 |                  |         |              |
|------------------------|---------|------------------------|----------------------|--------------|----------------------------------------|-----------------|------------------|---------|--------------|
| Acquisition Time (sec) | 3.4918  | Date                   | 25 Sep 2020 01:42:00 | File Name    | F:\NMR CE t H \tawatar\TT0591-1H-1.als | Frequency (MHz) | 500.16           | Nucleus | 1H           |
| Number of Transients   | 8       | Original Points Count  | 26214                | Points Count | 26214                                  | Pulse Sequence  | single_pulse.ex2 | Solvent | CHLOROFORM-D |
| Sweep Width (Hz)       | 7507.39 | Temperature (degree C) | 18.500               |              |                                        |                 |                  |         |              |

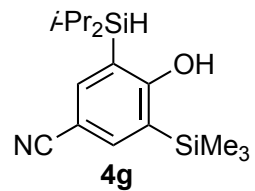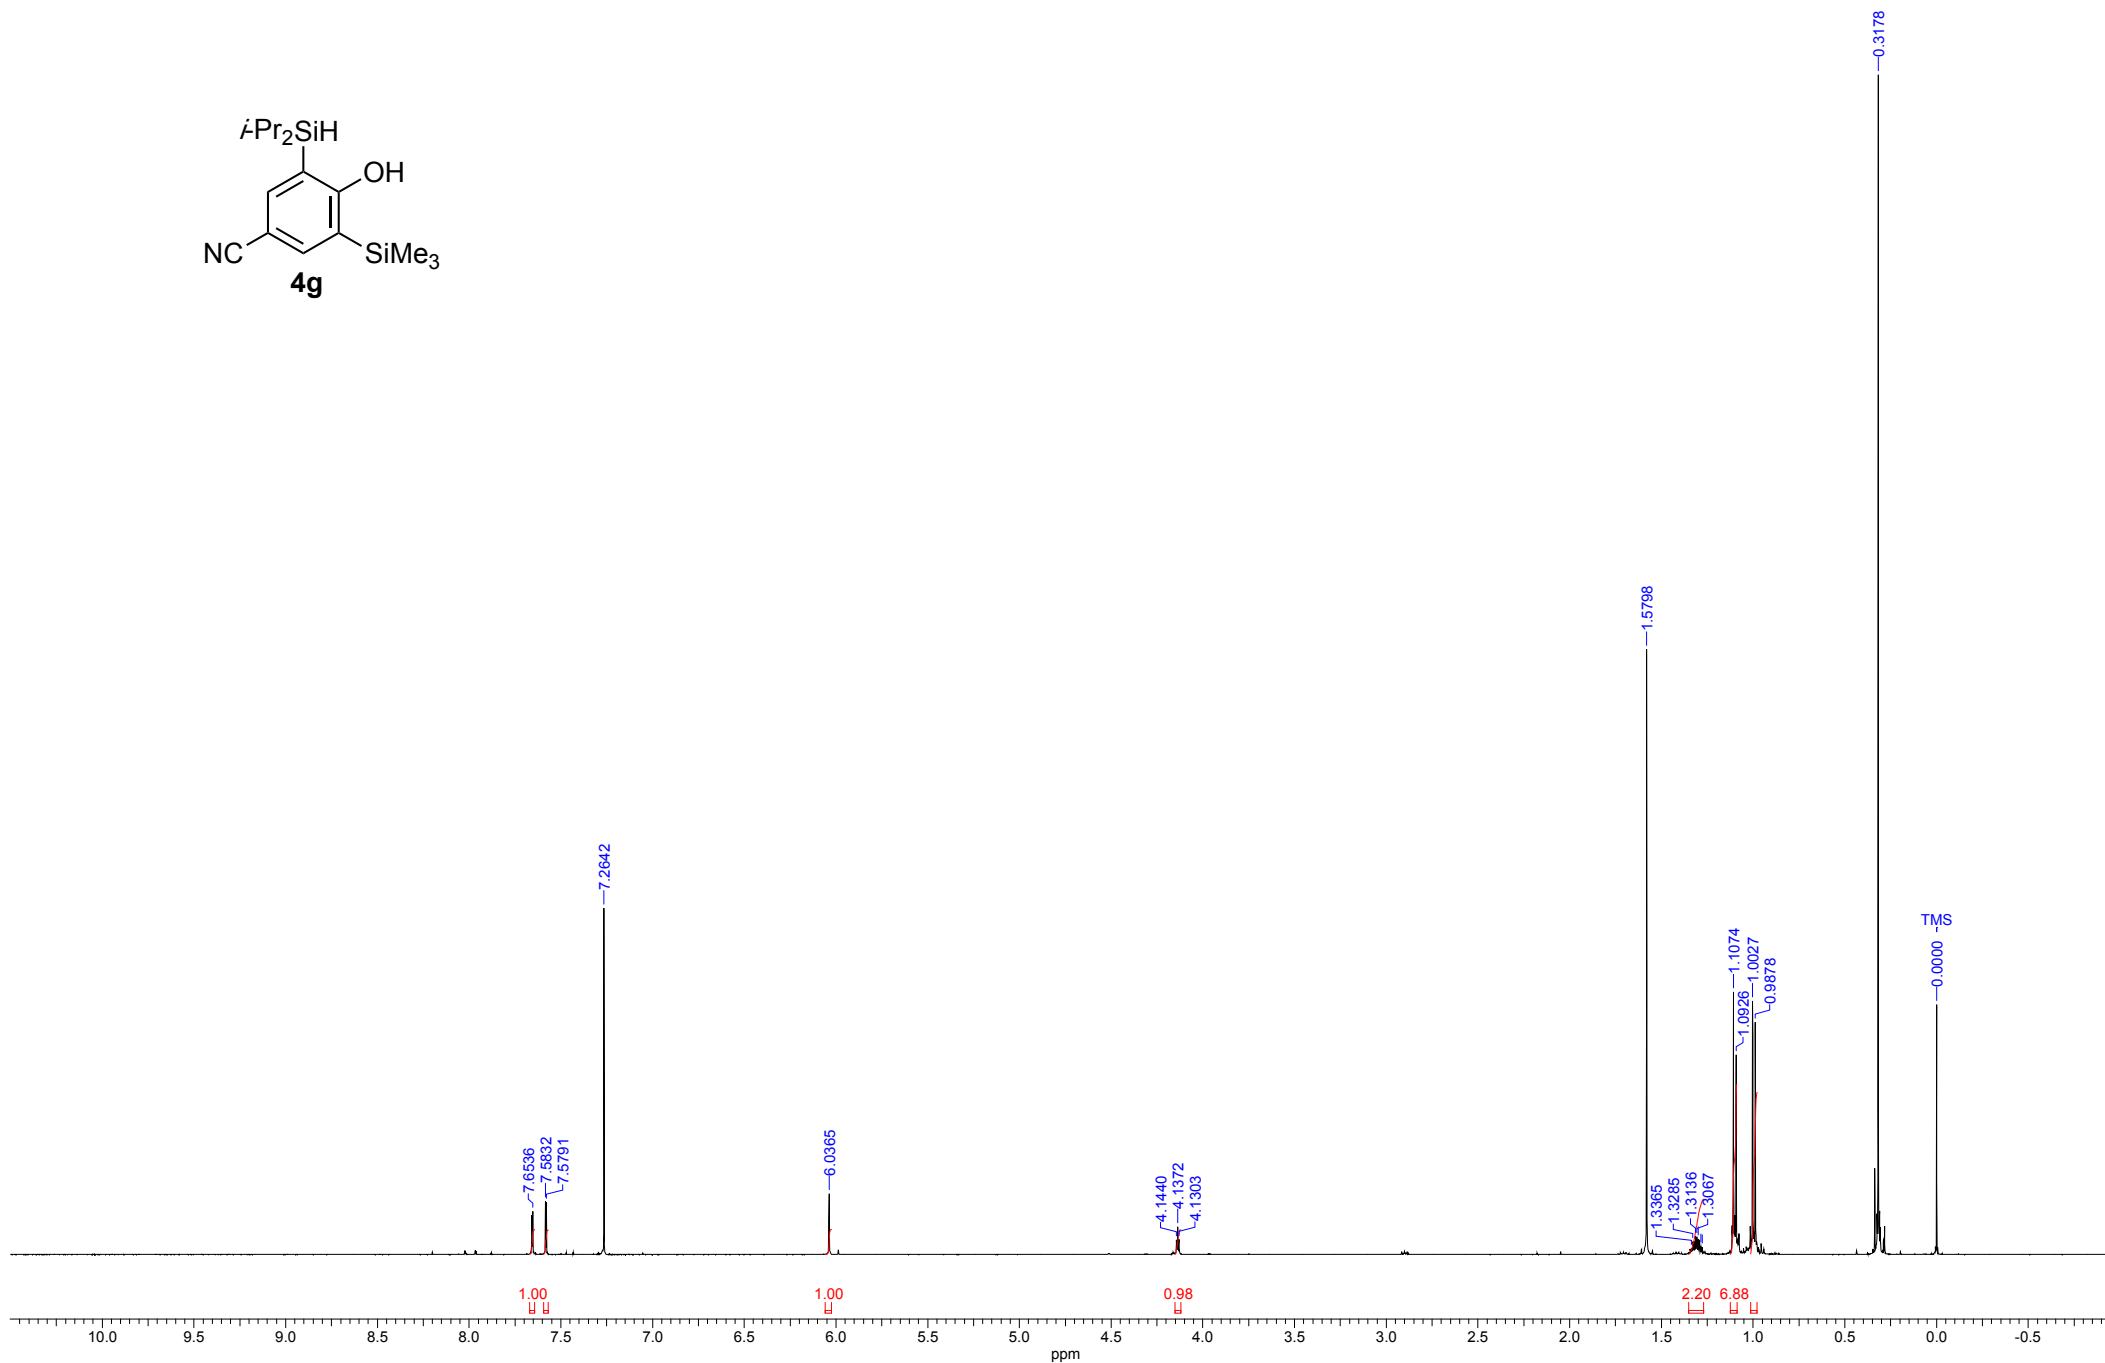

|                        |          |                        |                      |              |                                       |                 |                  |         |              |
|------------------------|----------|------------------------|----------------------|--------------|---------------------------------------|-----------------|------------------|---------|--------------|
| Acquisition Time (sec) | 0.8336   | Date                   | 14 Oct 2020 23:14:14 | File Name    | F:\NMR_CE_t_H\tawarani\TT0591-13C.als | Frequency (MHz) | 125.00           | Nucleus | 13C          |
| Number of Transients   | 256      | Original Points Count  | 26214                | Points Count | 26214                                 | Pulse Sequence  | single_pulse_dec | Solvent | CHLOROFORM-D |
| Sweep Width (Hz)       | 31444.86 | Temperature (degree C) | 18.900               |              |                                       |                 |                  |         |              |

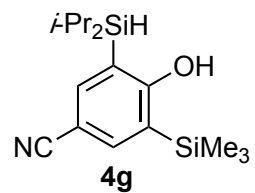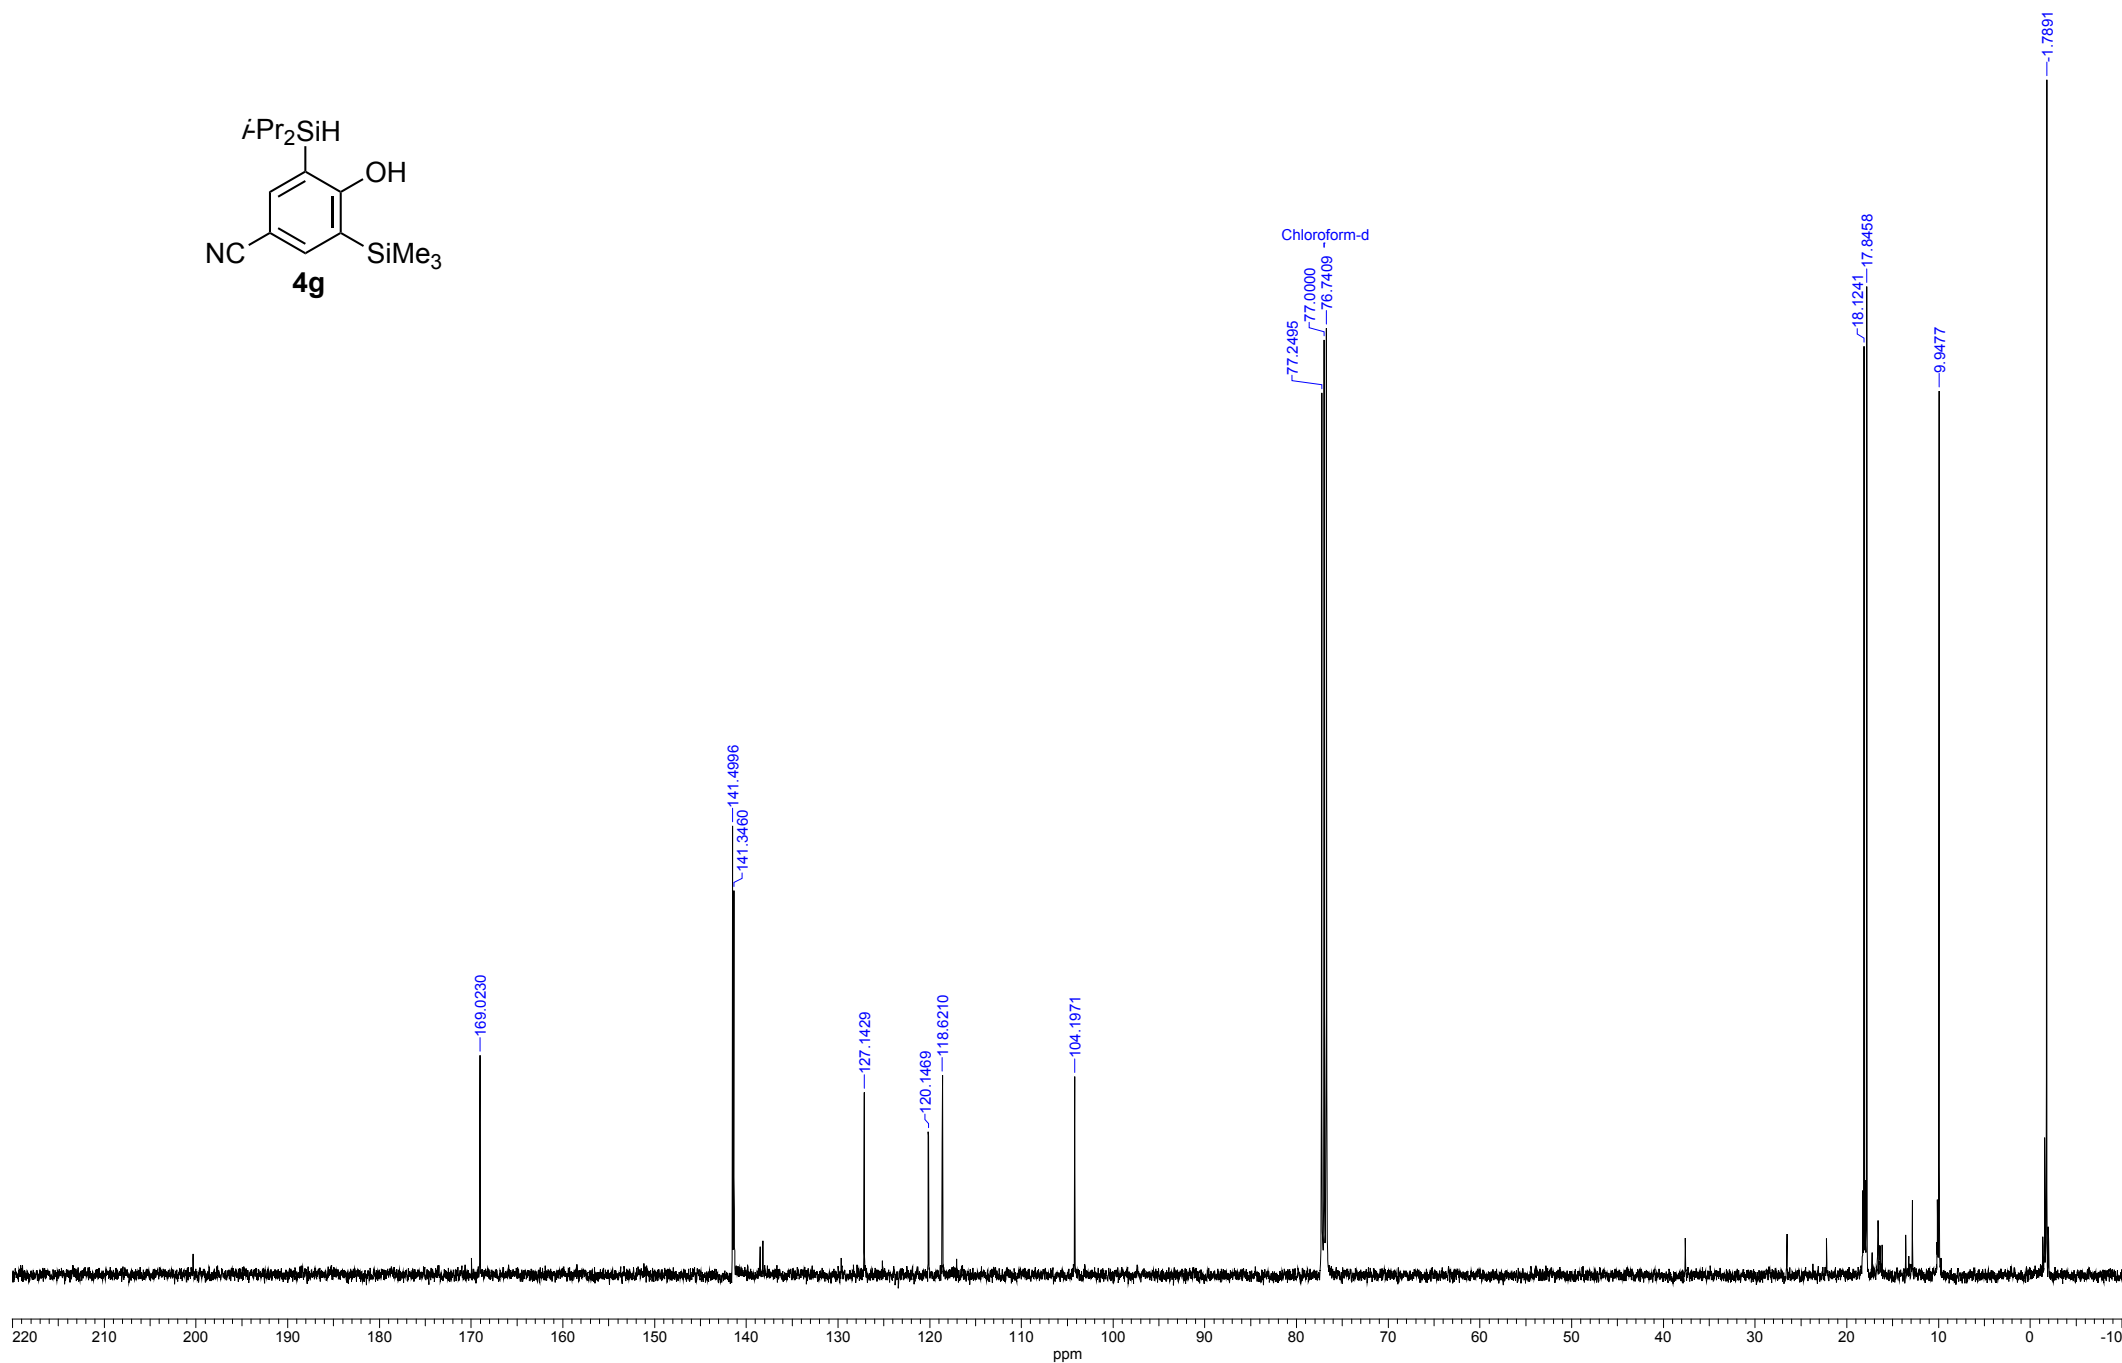

|                        |         |                        |              |                      |                      |                       |                                                  |              |
|------------------------|---------|------------------------|--------------|----------------------|----------------------|-----------------------|--------------------------------------------------|--------------|
| Acquisition Time (sec) | 1.8153  | Comment                | single pulse | Date                 | 04 Dec 2020 22:00:56 | File Name             | F:\NMR CE t H \tawatari\TT0652-1H_proton-1-1.als |              |
| Frequency (MHz)        | 600.17  | Nucleus                | 1H           | Number of Transients | 8                    | Original Points Count | 16384                                            |              |
| Sweep Width (Hz)       | 9025.27 | Temperature (degree C) | 20.700       | Points Count         | 13120                | Pulse Sequence        | proton.jxp                                       |              |
|                        |         |                        |              |                      |                      |                       | Solvent                                          | CHLOROFORM-D |

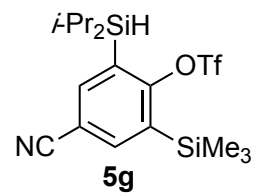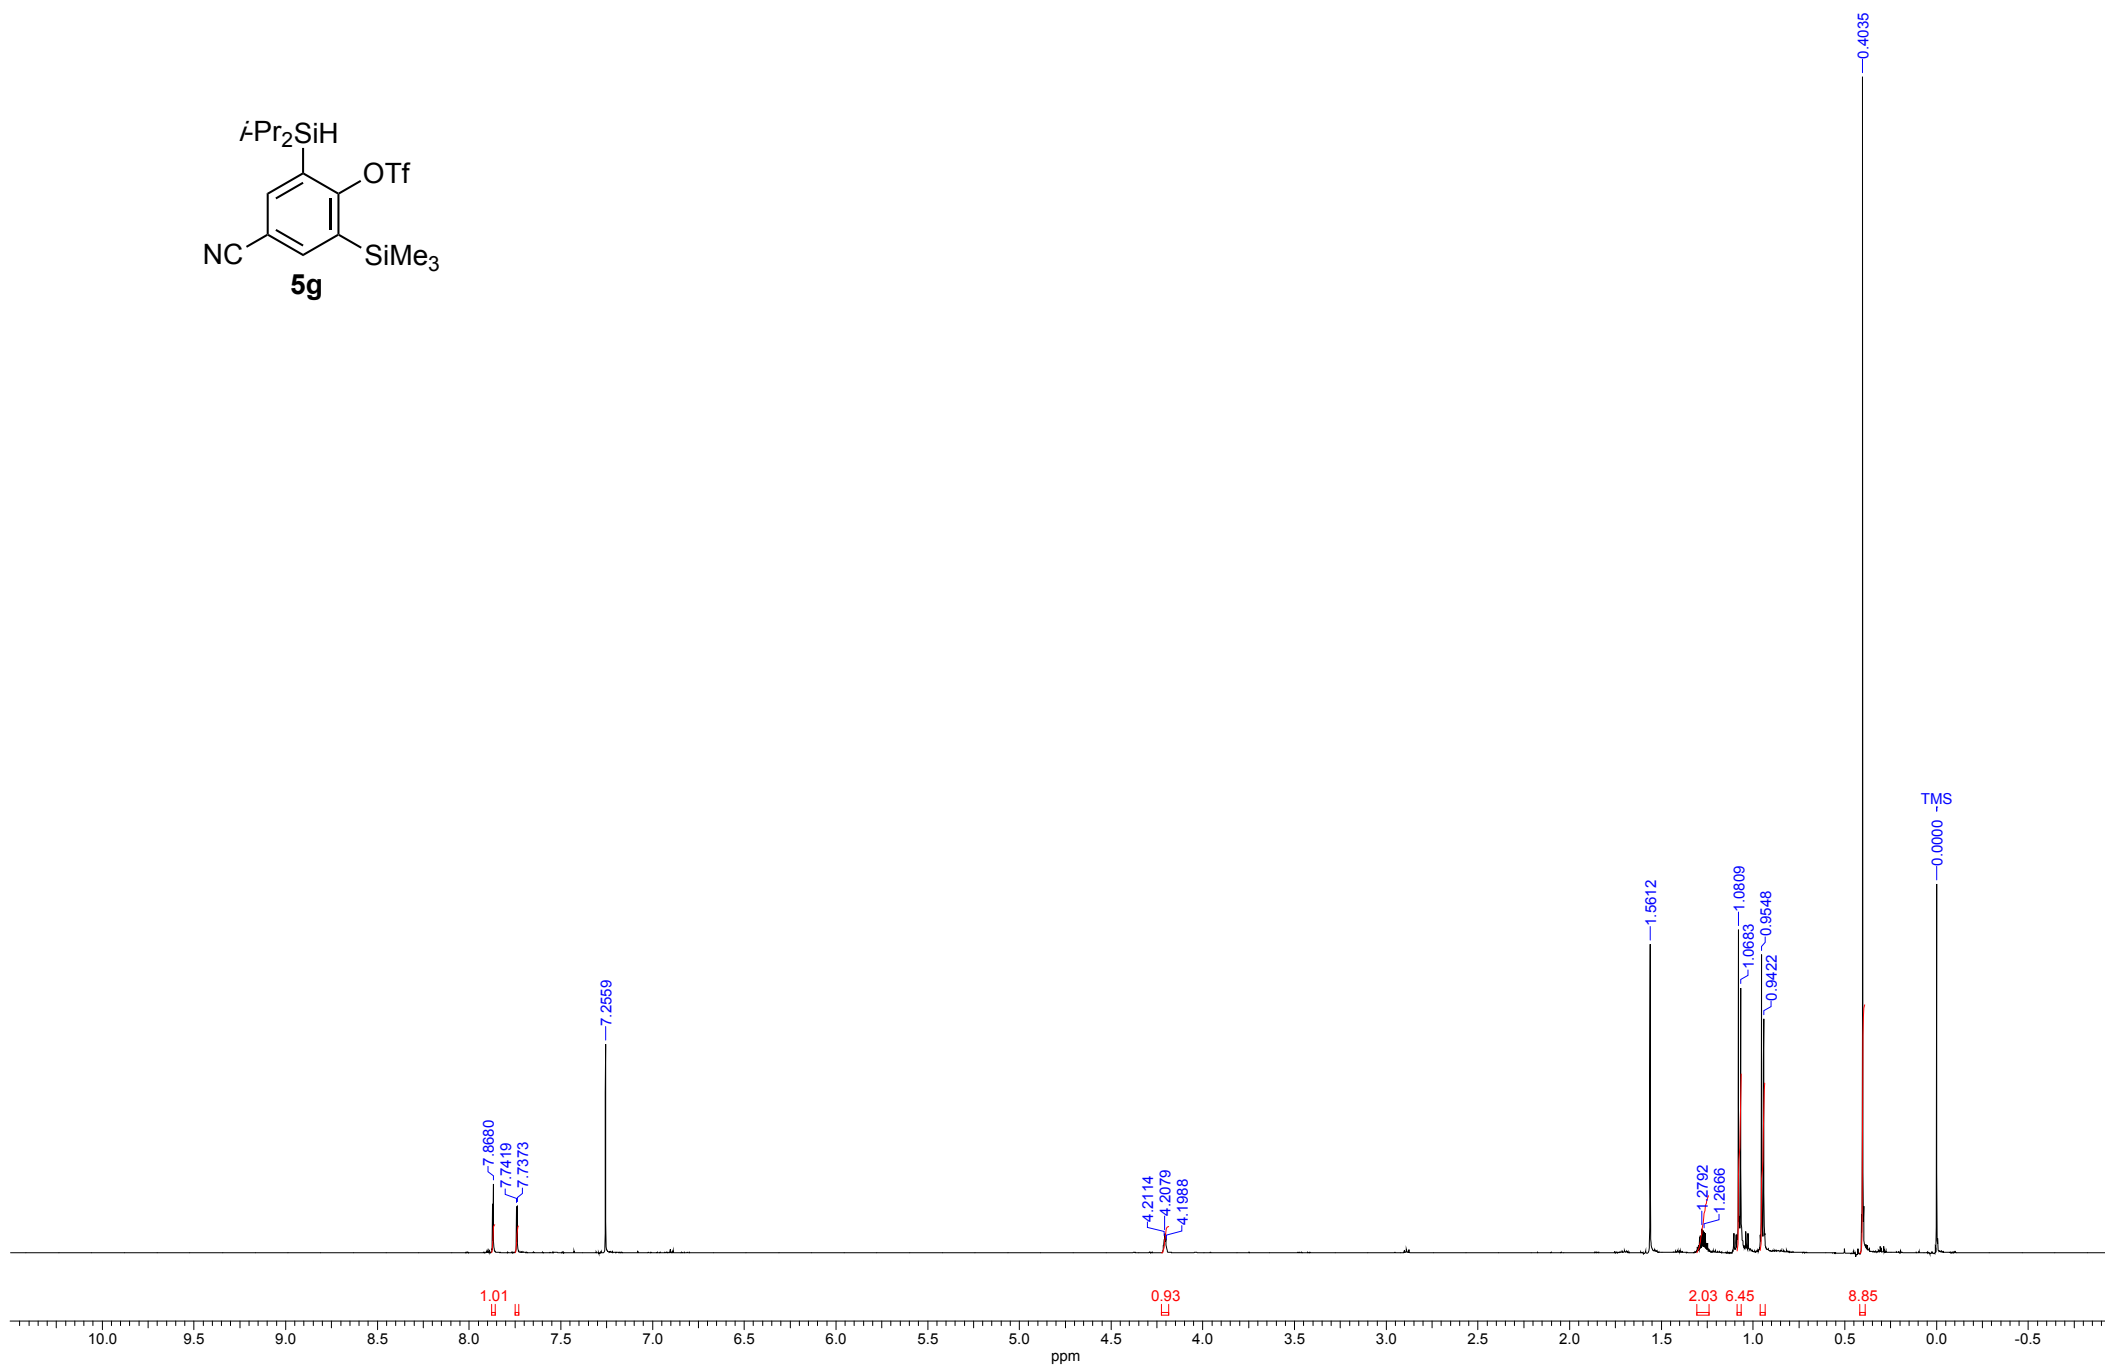



|                        |          |                        |                                  |                       |                      |              |                                                |
|------------------------|----------|------------------------|----------------------------------|-----------------------|----------------------|--------------|------------------------------------------------|
| Acquisition Time (sec) | 0.6921   | Comment                | single pulse decoupled gated NOE | Date                  | 04 Dec 2020 21:53:58 | File Name    | F:\NMR_CE_t_H_tawatari\TT0652-13C_carbon-1.als |
| Frequency (MHz)        | 150.00   | Number of Transients   | 128                              | Original Points Count | 26214                | Points Count | 26214                                          |
| Sweep Width (Hz)       | 37876.77 | Temperature (degree C) | 20.800                           | Pulse Sequence        | carbon_cool.jxp      | Solvent      | CHLOROFORM-D                                   |

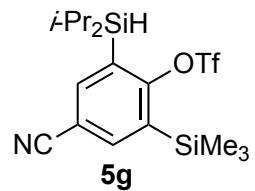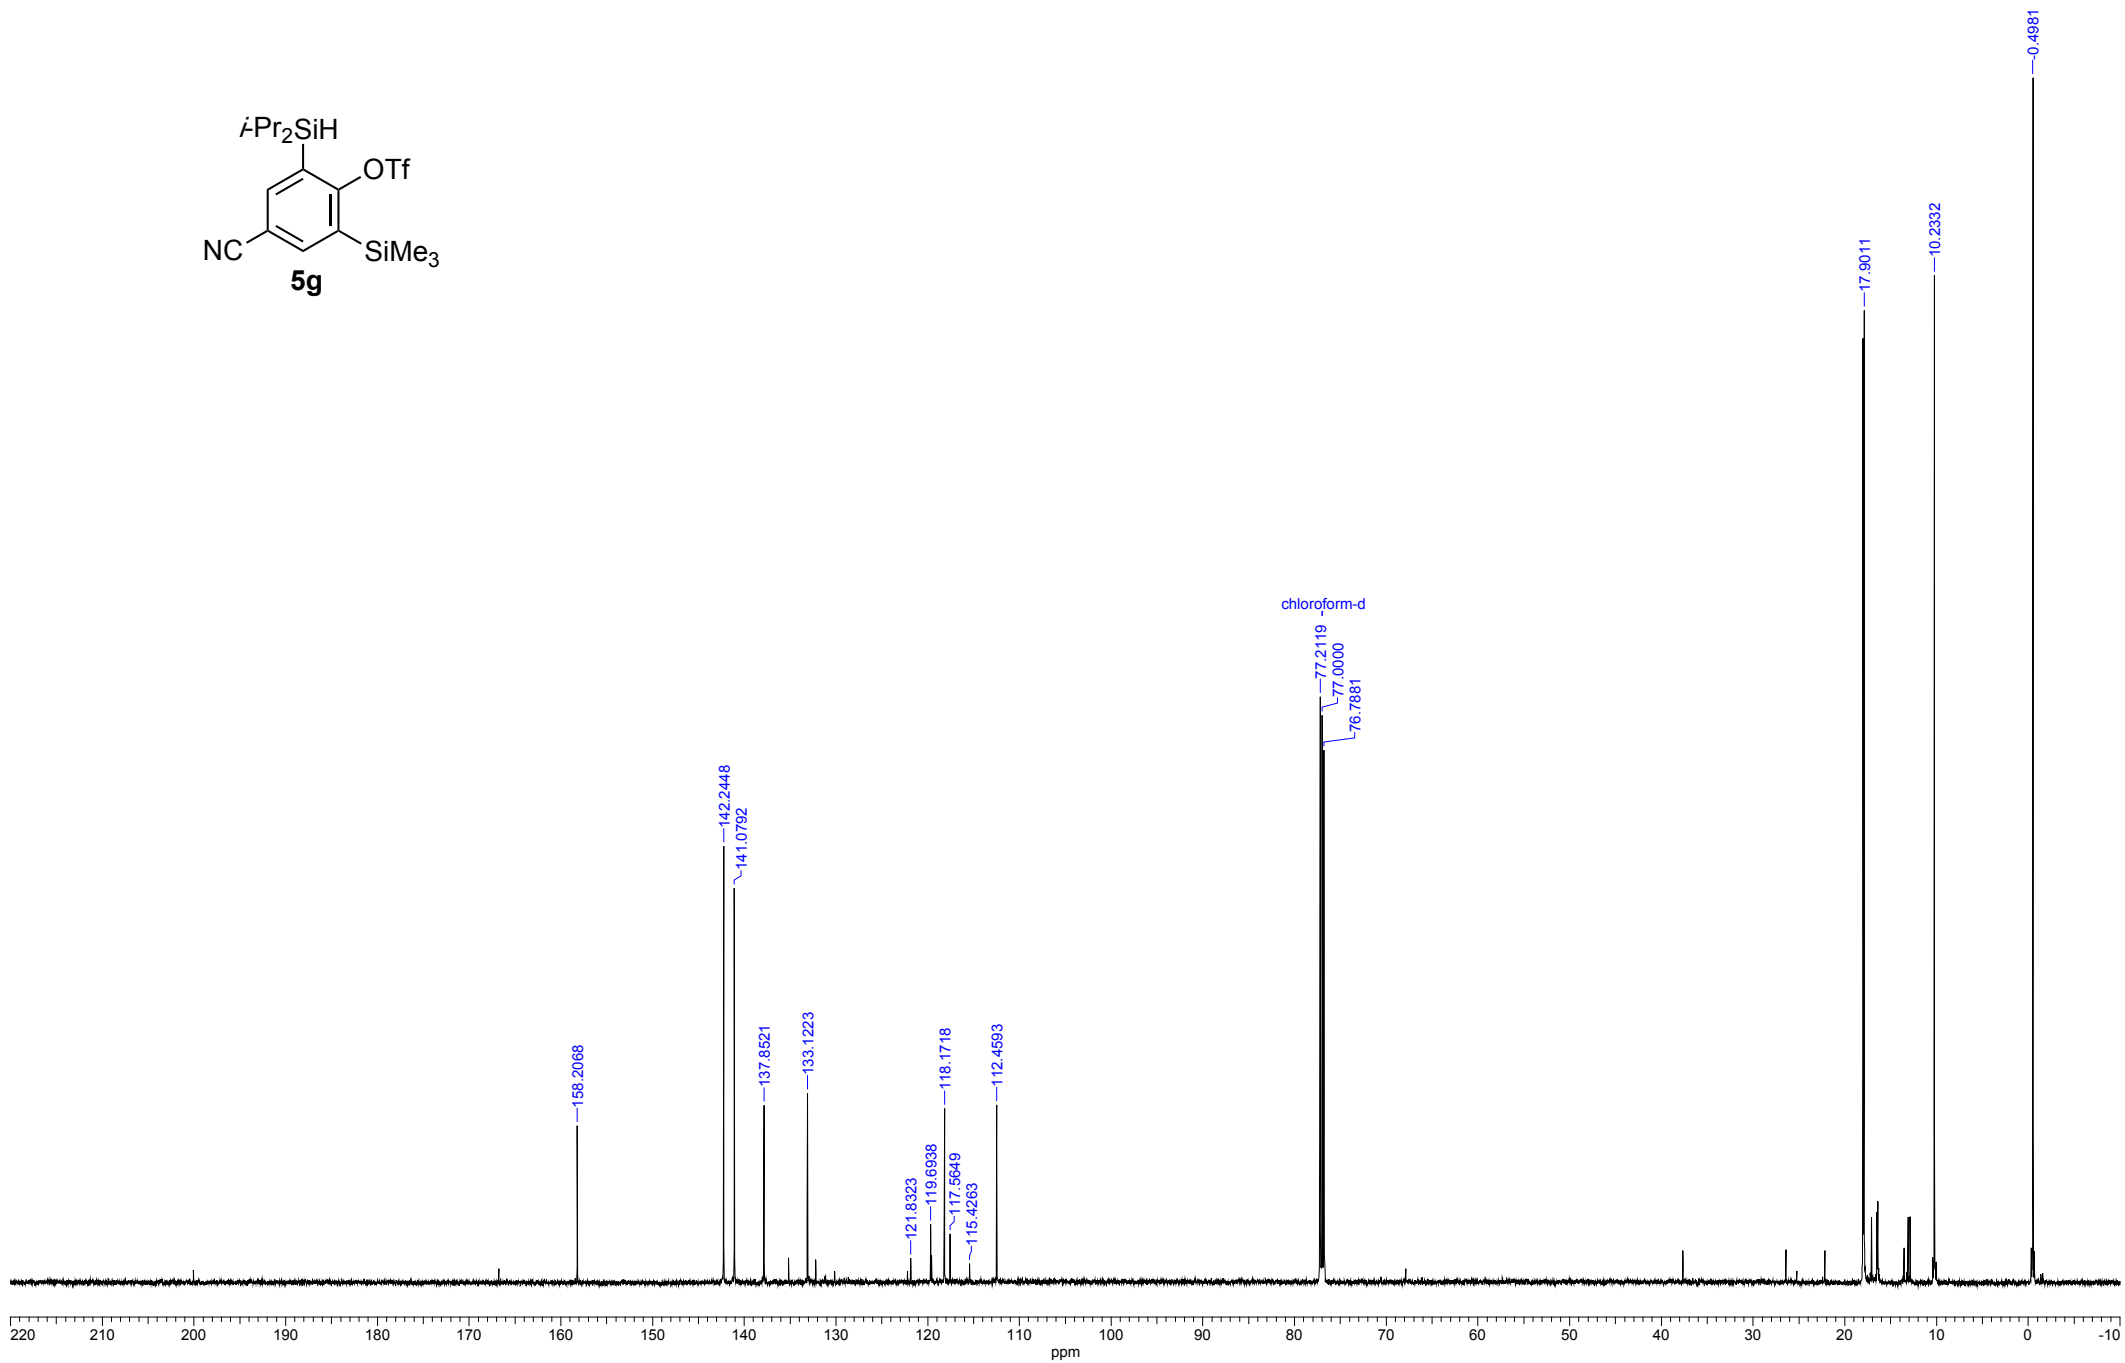

|                        |         |                        |              |                      |                      |                       |                                                        |
|------------------------|---------|------------------------|--------------|----------------------|----------------------|-----------------------|--------------------------------------------------------|
| Acquisition Time (sec) | 1.8153  | Comment                | single_pulse | Date                 | 11 Dec 2020 13:00:14 | File Name             | F:\NMR CE t H \tawatari\TTO657-1Hretake_proton-1-1_als |
| Frequency (MHz)        | 600.17  | Nucleus                | 1H           | Number of Transients | 8                    | Original Points Count | 16384                                                  |
| Sweep Width (Hz)       | 9025.27 | Temperature (degree C) | 20.900       | Points Count         | 13120                | Pulse Sequence        | proton.jxp                                             |
|                        |         |                        |              |                      |                      | Solvent               | CHLOROFORM-D                                           |

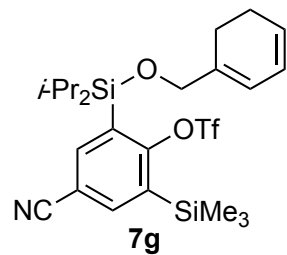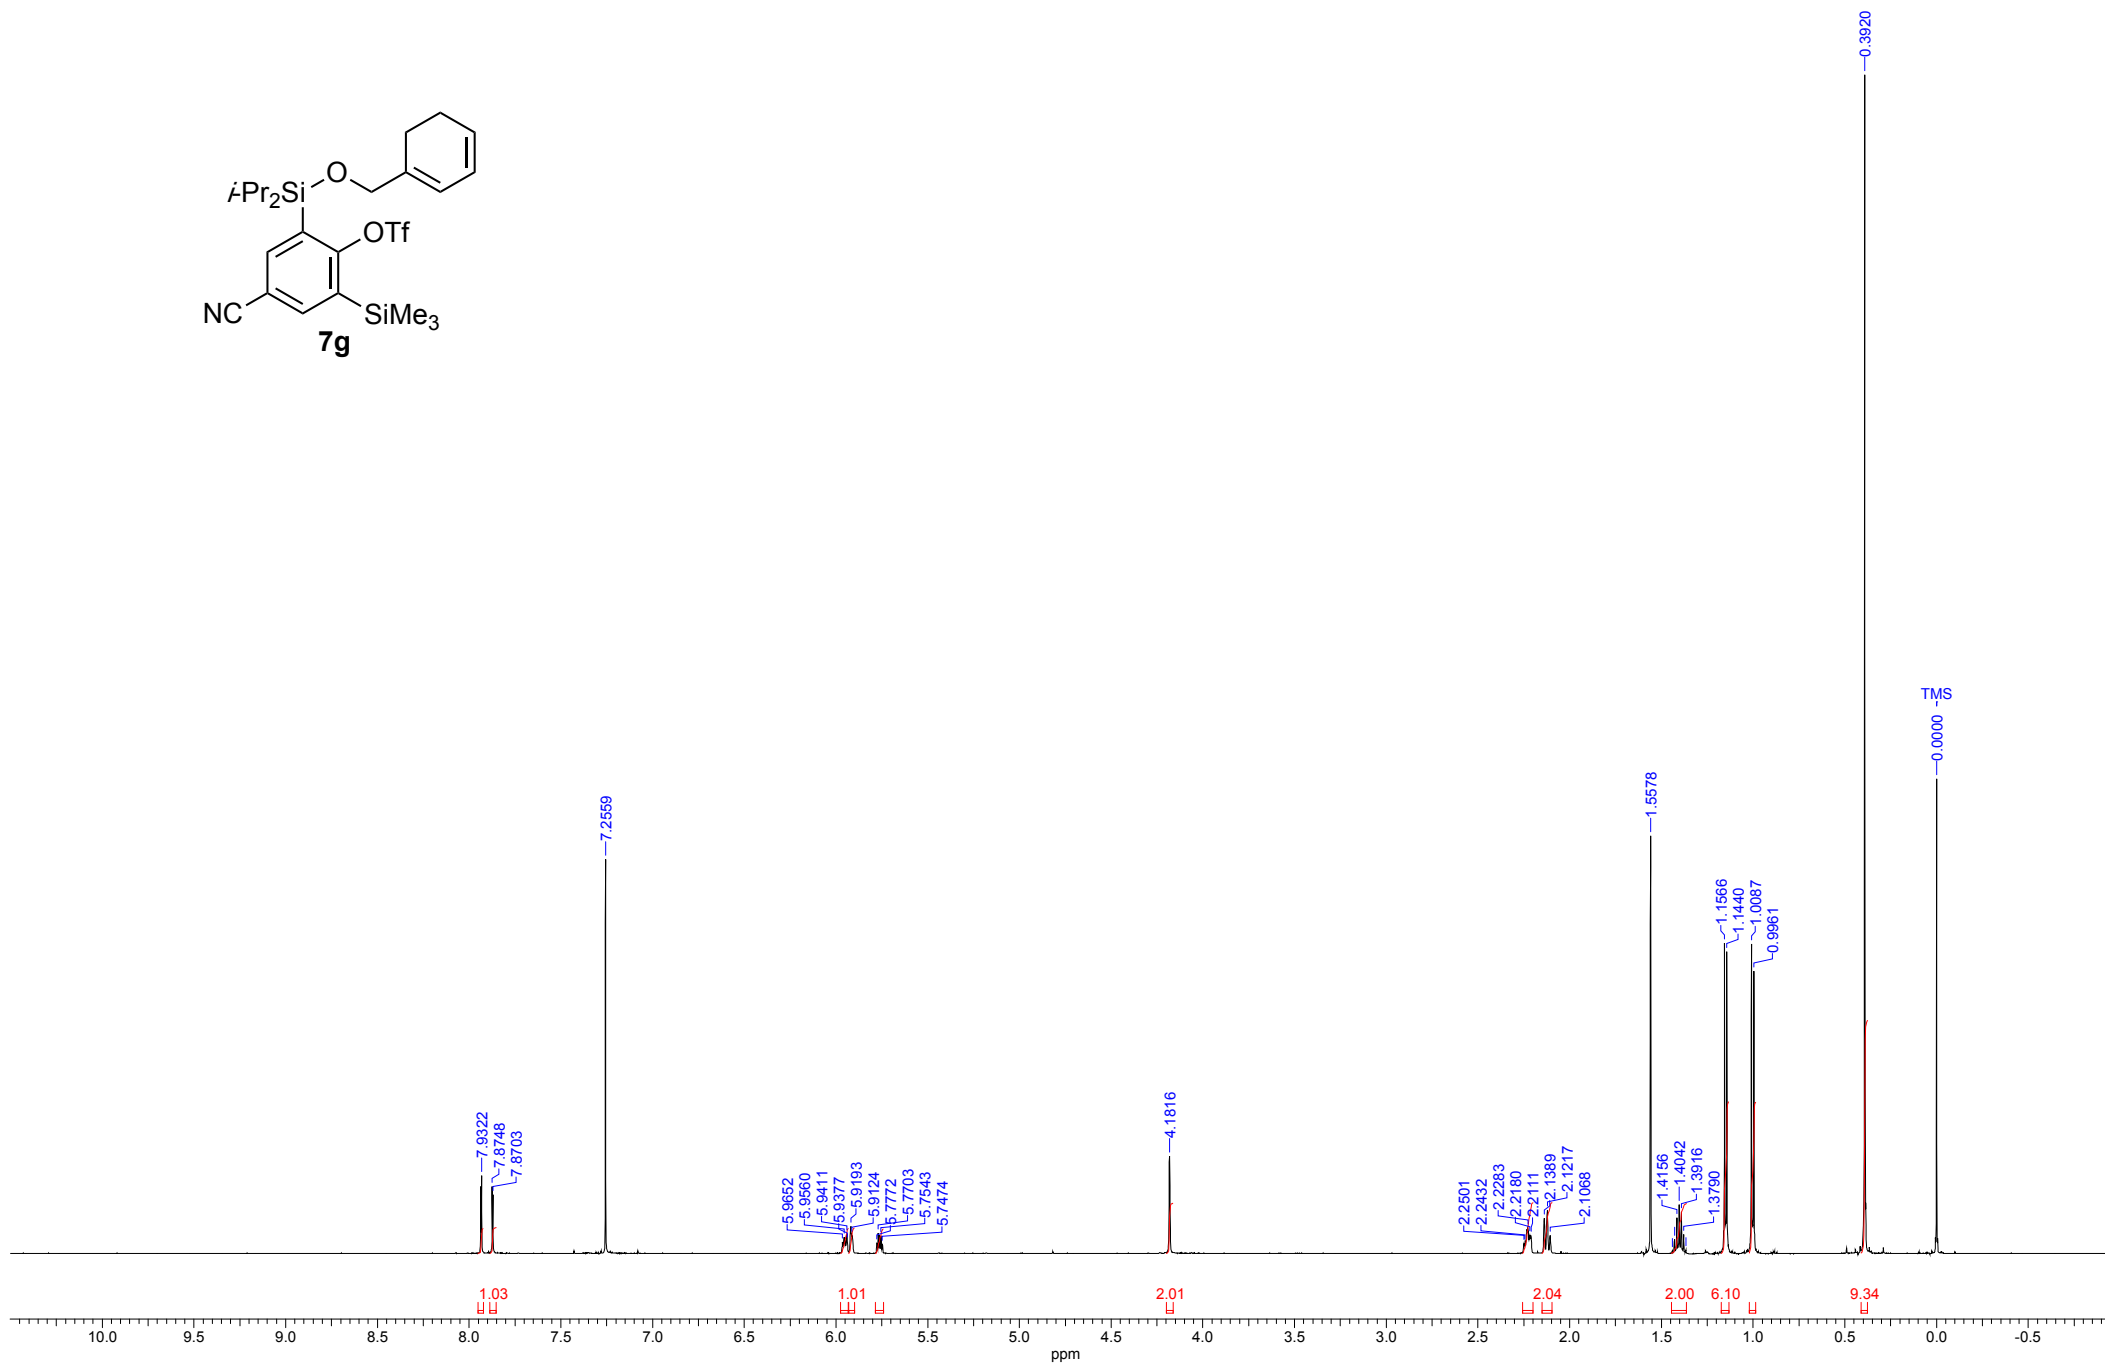

|                        |                                                      |                 |                                  |                        |                      |
|------------------------|------------------------------------------------------|-----------------|----------------------------------|------------------------|----------------------|
| Acquisition Time (sec) | 0.6921                                               | Comment         | single pulse decoupled gated NOE | Date                   | 11 Dec 2020 12:59:08 |
| File Name              | F:\NMR CE t H \tawatar\TT0657-13Cretake carbon-1.als | Frequency (MHz) | 150.00                           | Number of Transients   | 256                  |
| Pulse Sequence         | carbon_cool.jxp                                      | Solvent         | CHLOROFORM-D                     | Original Points Count  | 26214                |
|                        |                                                      |                 |                                  | Temperature (degree C) | 20.800               |
|                        |                                                      |                 |                                  | Points Count           | 26214                |

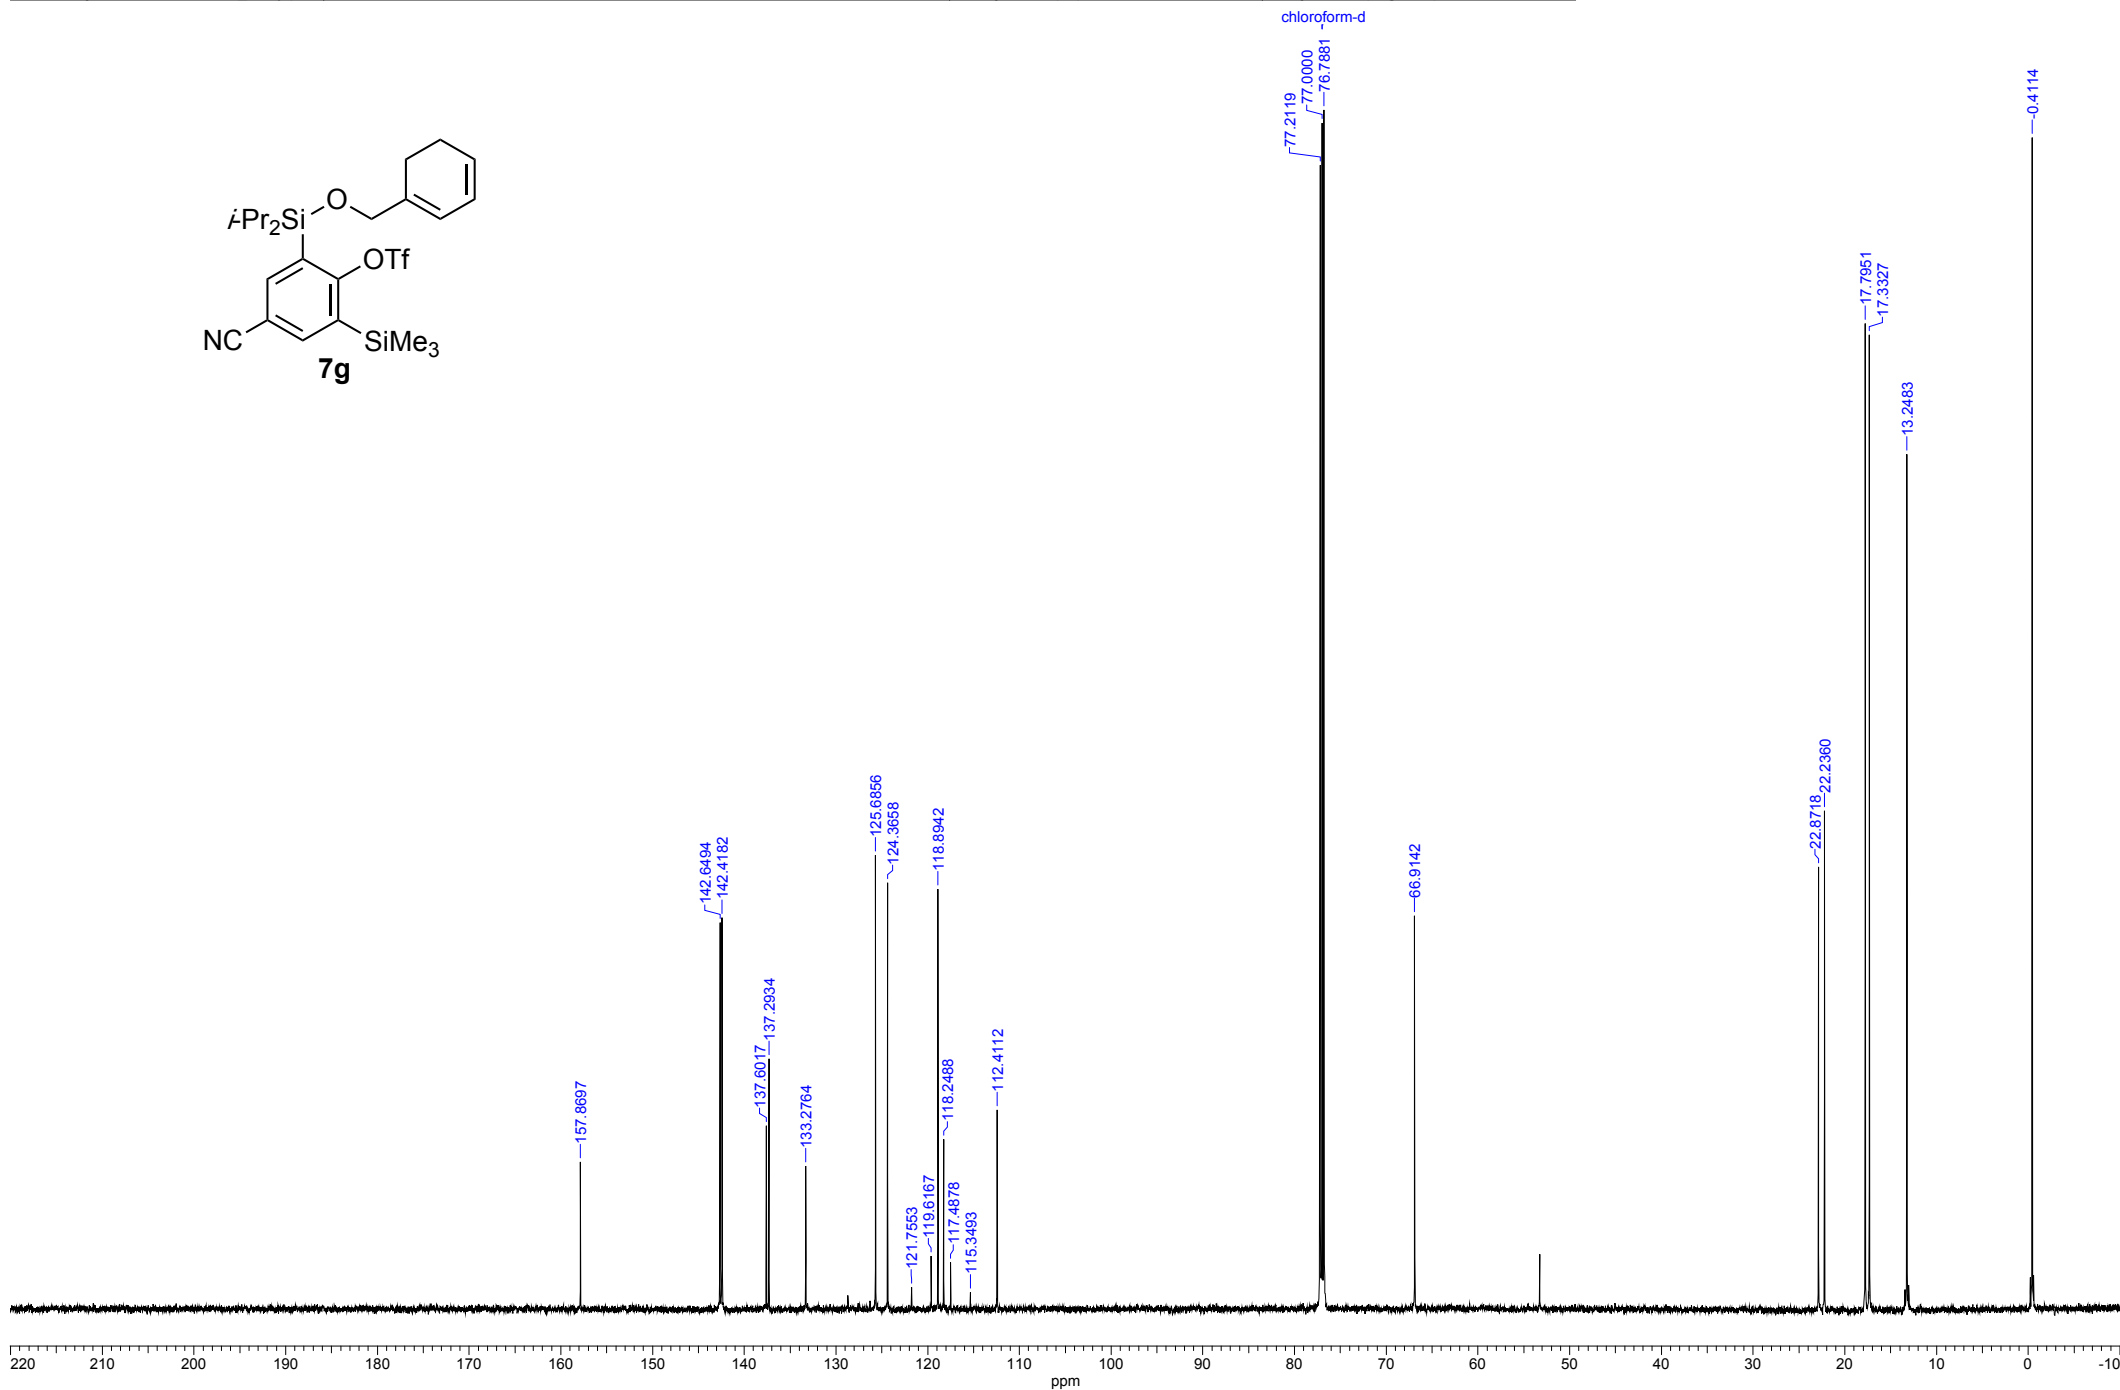

|                        |         |                        |                      |              |                                       |                 |                  |         |              |
|------------------------|---------|------------------------|----------------------|--------------|---------------------------------------|-----------------|------------------|---------|--------------|
| Acquisition Time (sec) | 3.4918  | Date                   | 22 Jan 2020 11:35:38 | File Name    | F:\NMR_CE_t_H\tawatar\TT0327-1H-1.als | Frequency (MHz) | 500.16           | Nucleus | 1H           |
| Number of Transients   | 8       | Original Points Count  | 26214                | Points Count | 26214                                 | Pulse Sequence  | single_pulse.ex2 | Solvent | CHLOROFORM-D |
| Sweep Width (Hz)       | 7507.39 | Temperature (degree C) | 19.000               |              |                                       |                 |                  |         |              |

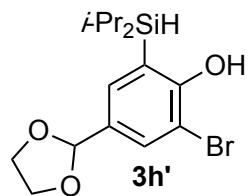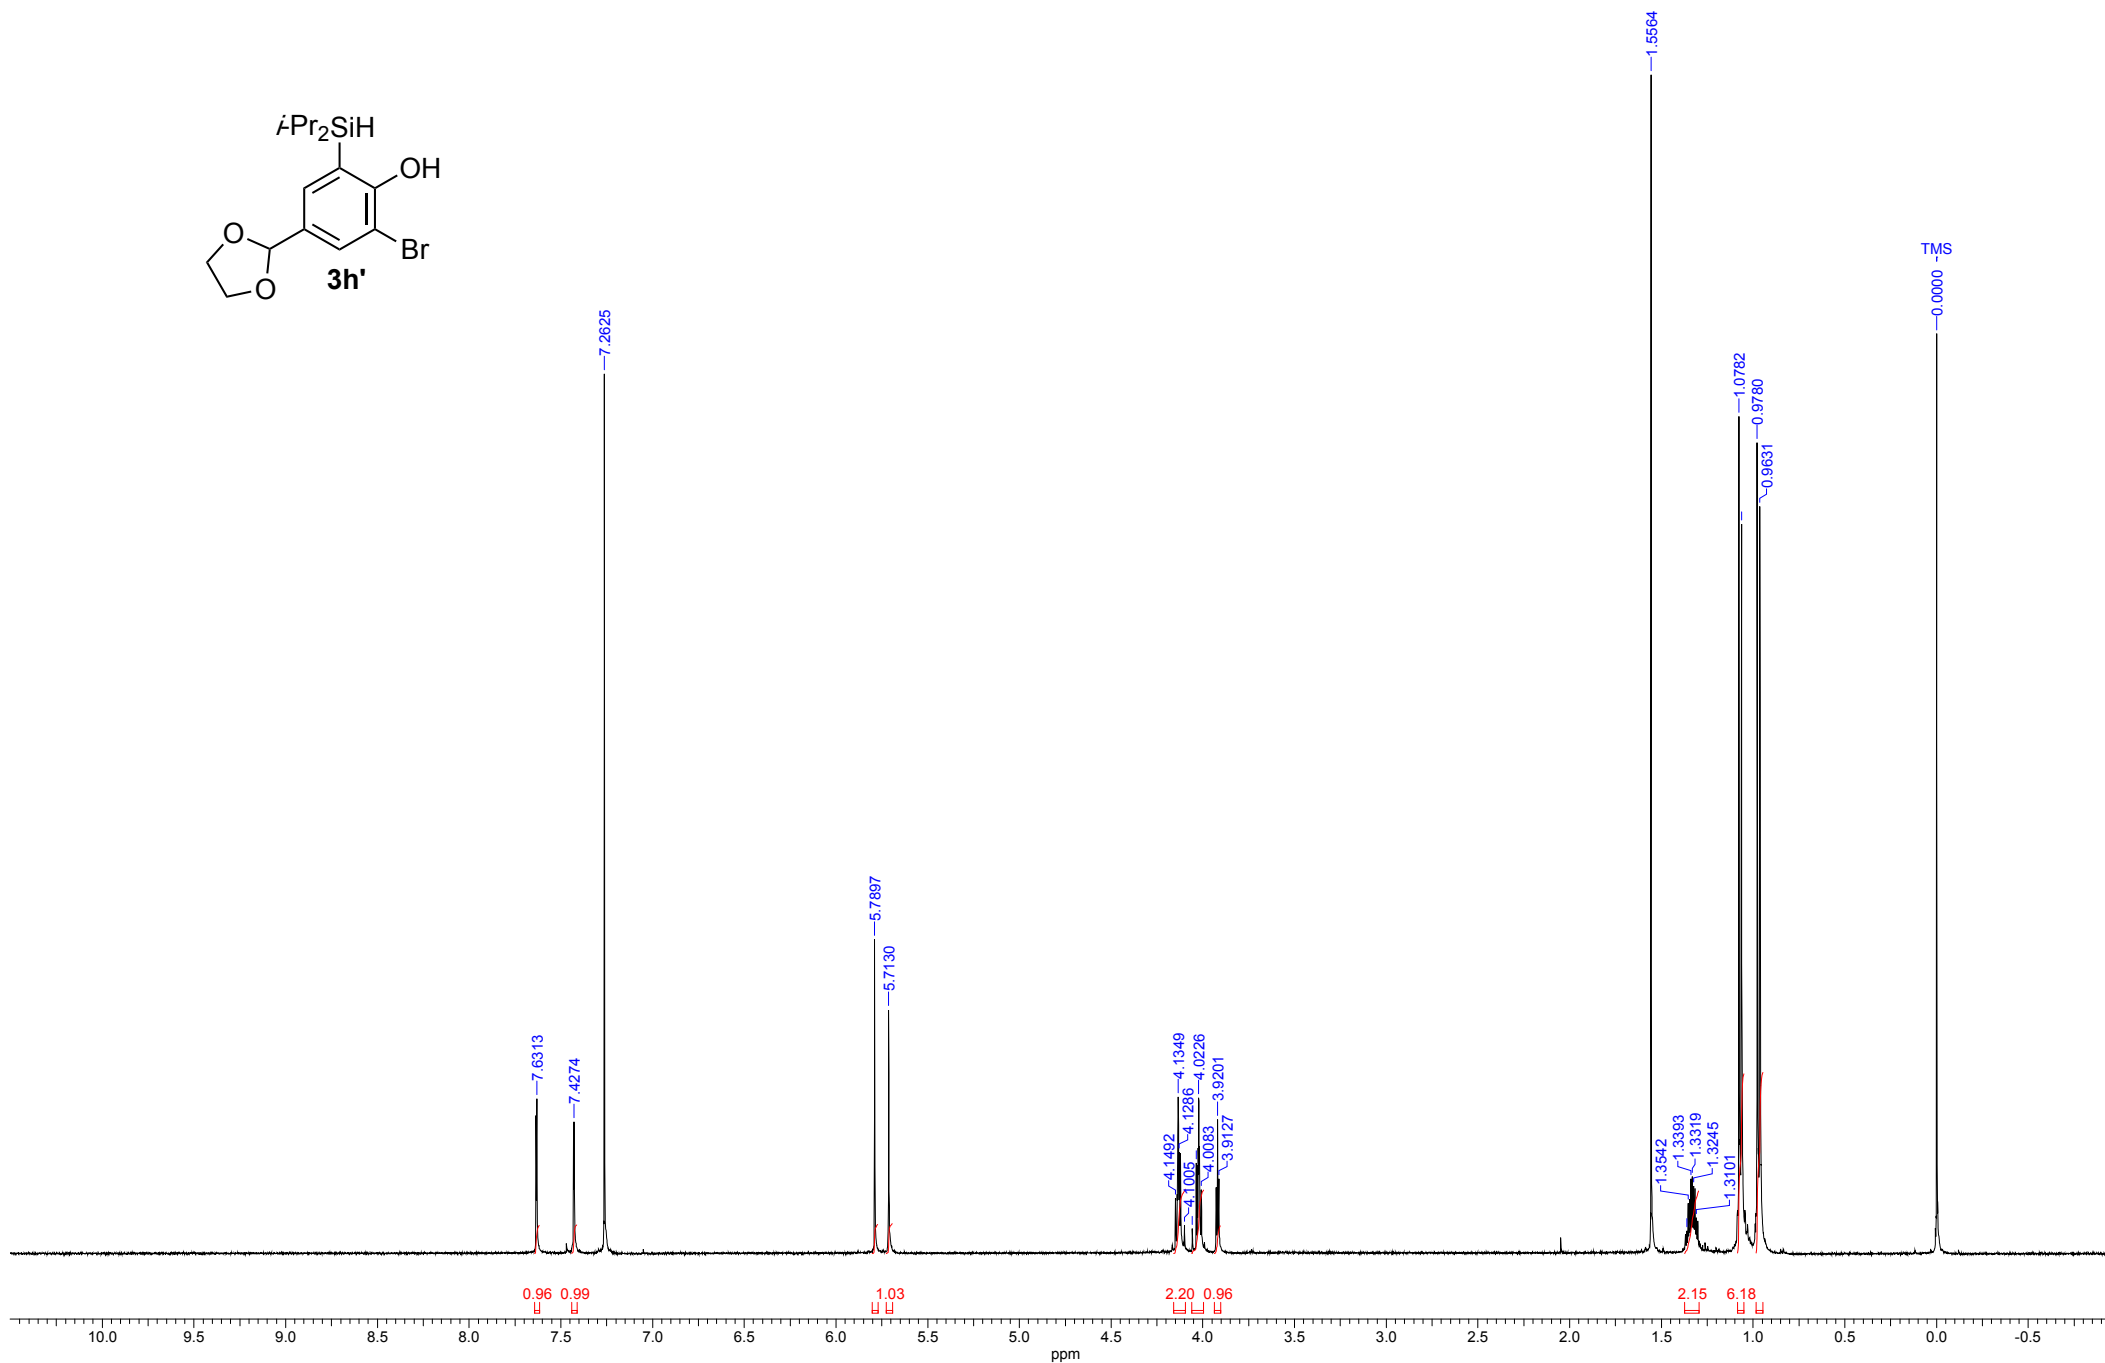

|                        |          |                        |                      |              |                                         |                 |                  |         |              |
|------------------------|----------|------------------------|----------------------|--------------|-----------------------------------------|-----------------|------------------|---------|--------------|
| Acquisition Time (sec) | 0.8336   | Date                   | 22 Jan 2020 11:39:58 | File Name    | F:\NMR_CE t H \tawatar\TT0327-13C-1.als | Frequency (MHz) | 125.77           | Nucleus | 13C          |
| Number of Transients   | 256      | Original Points Count  | 26214                | Points Count | 26214                                   | Pulse Sequence  | single_pulse_dec | Solvent | CHLOROFORM-D |
| Sweep Width (Hz)       | 31446.06 | Temperature (degree C) | 20.200               |              |                                         |                 |                  |         |              |

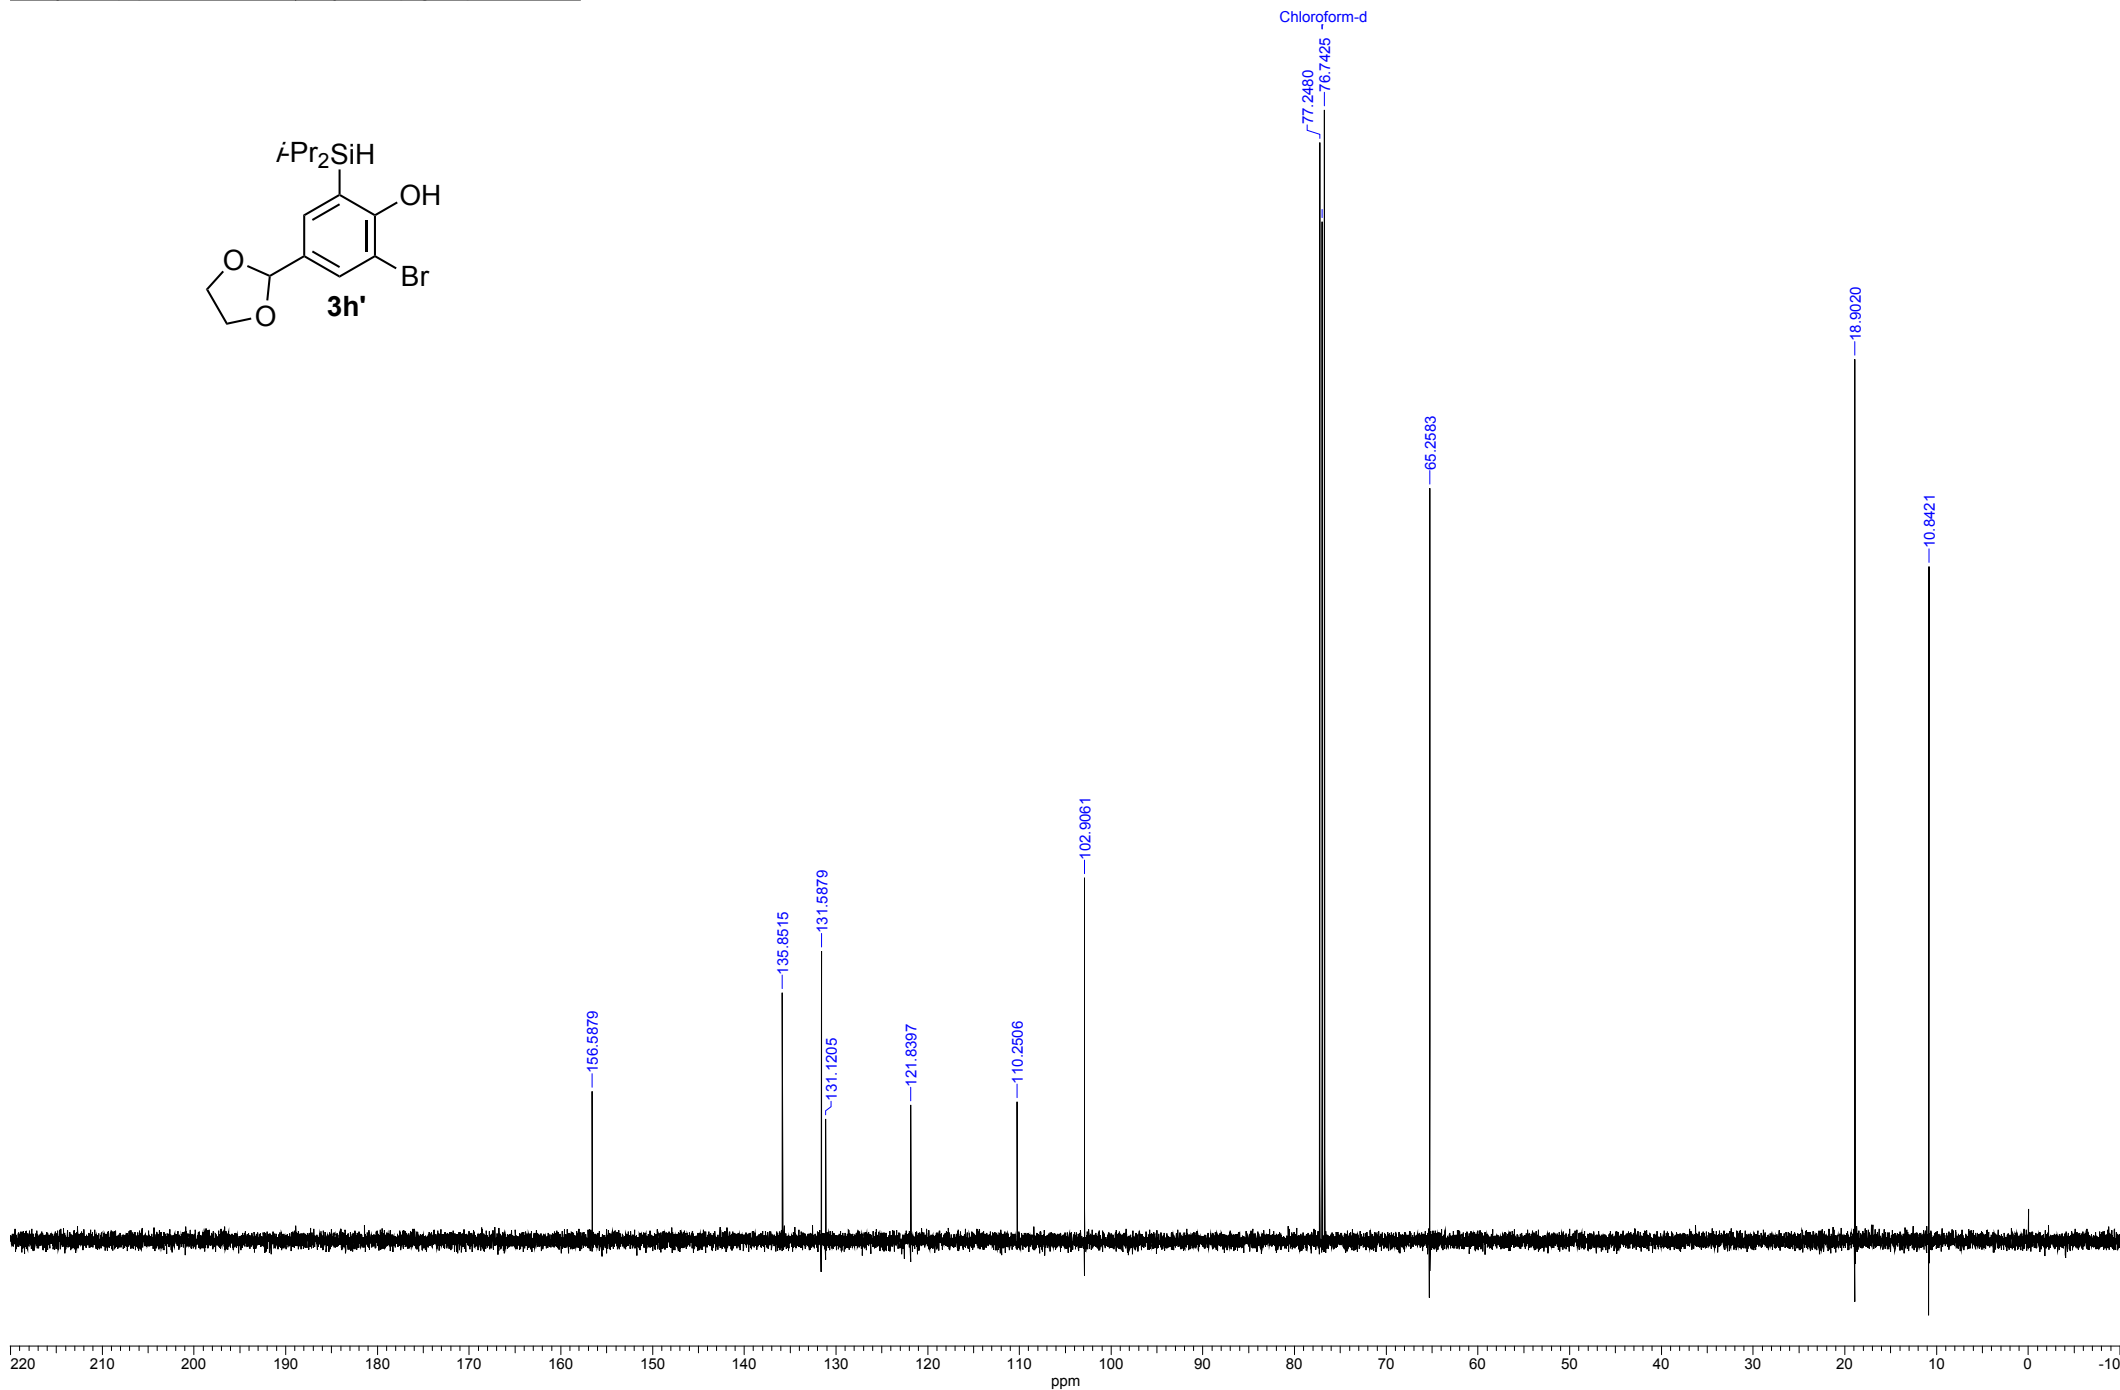

|                        |         |                        |                      |              |                                             |                 |                  |         |              |
|------------------------|---------|------------------------|----------------------|--------------|---------------------------------------------|-----------------|------------------|---------|--------------|
| Acquisition Time (sec) | 3.4918  | Date                   | 23 Jan 2020 11:55:50 | File Name    | F:\NMR CE t H \tawatari\TT0329column2-1.als | Frequency (MHz) | 500.16           | Nucleus | 1H           |
| Number of Transients   | 8       | Original Points Count  | 26214                | Points Count | 26214                                       | Pulse Sequence  | single_pulse.ex2 | Solvent | CHLOROFORM-D |
| Sweep Width (Hz)       | 7507.39 | Temperature (degree C) | 19.300               |              |                                             |                 |                  |         |              |

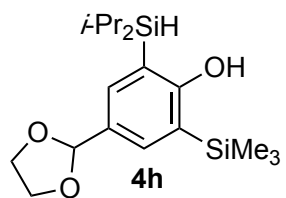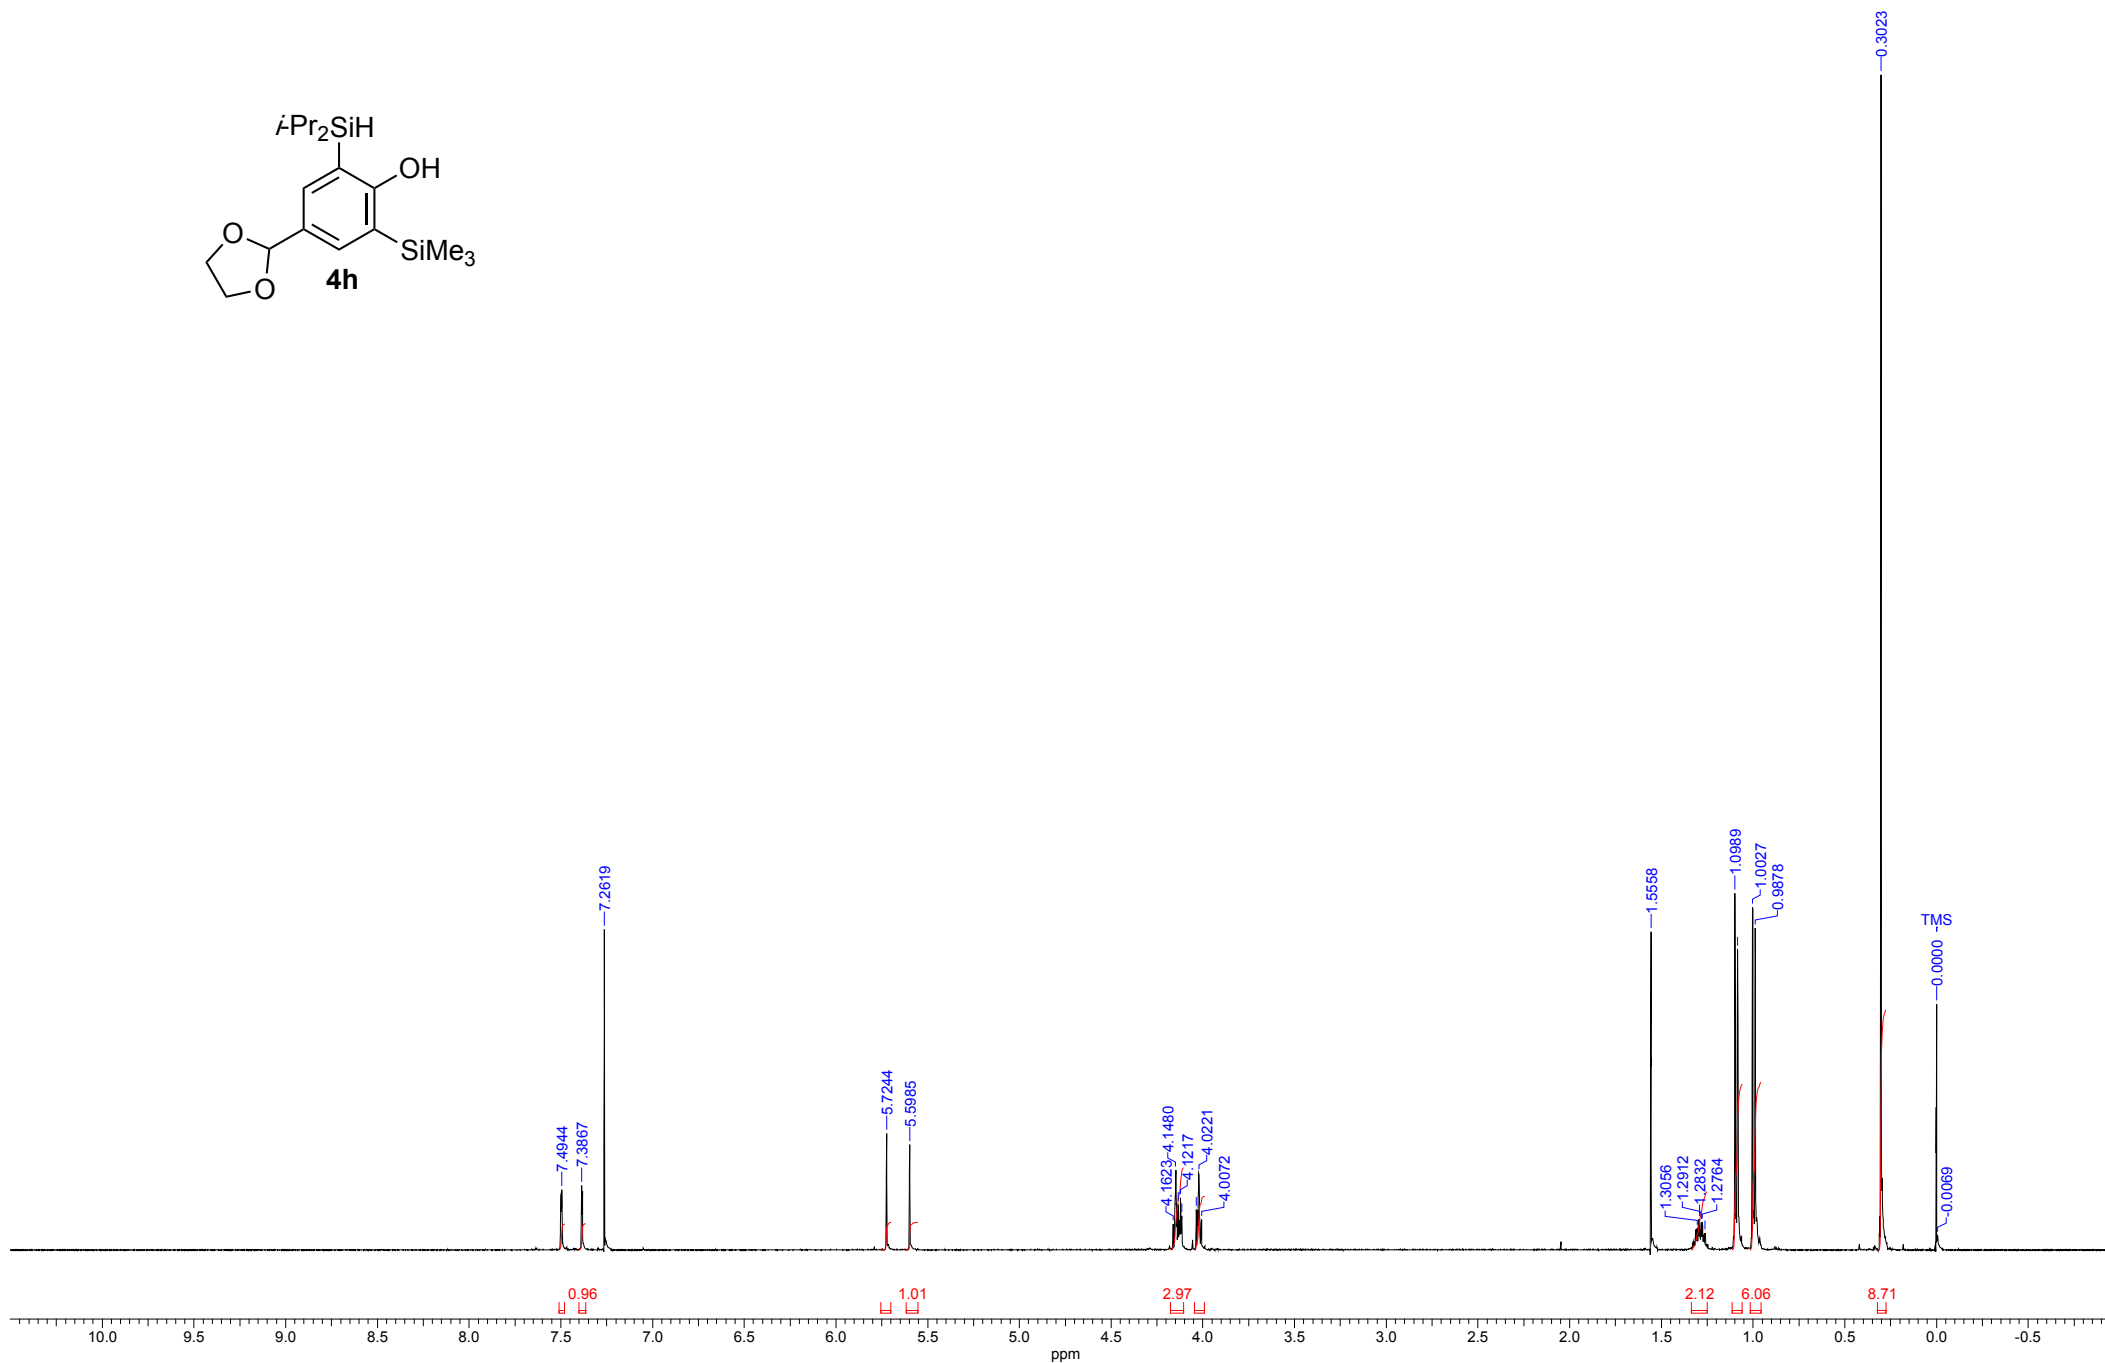

|                        |          |                        |                      |              |                                        |                 |                  |         |              |
|------------------------|----------|------------------------|----------------------|--------------|----------------------------------------|-----------------|------------------|---------|--------------|
| Acquisition Time (sec) | 0.8336   | Date                   | 02 Mar 2020 18:18:40 | File Name    | F:\NMR_CE_t_H\tawatar\TT0329-13C-1.als | Frequency (MHz) | 125.77           | Nucleus | 13C          |
| Number of Transients   | 256      | Original Points Count  | 26214                | Points Count | 26214                                  | Pulse Sequence  | single_pulse_dec | Solvent | CHLOROFORM-D |
| Sweep Width (Hz)       | 31446.06 | Temperature (degree C) | 19.900               |              |                                        |                 |                  |         |              |

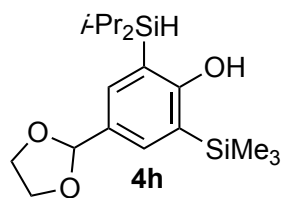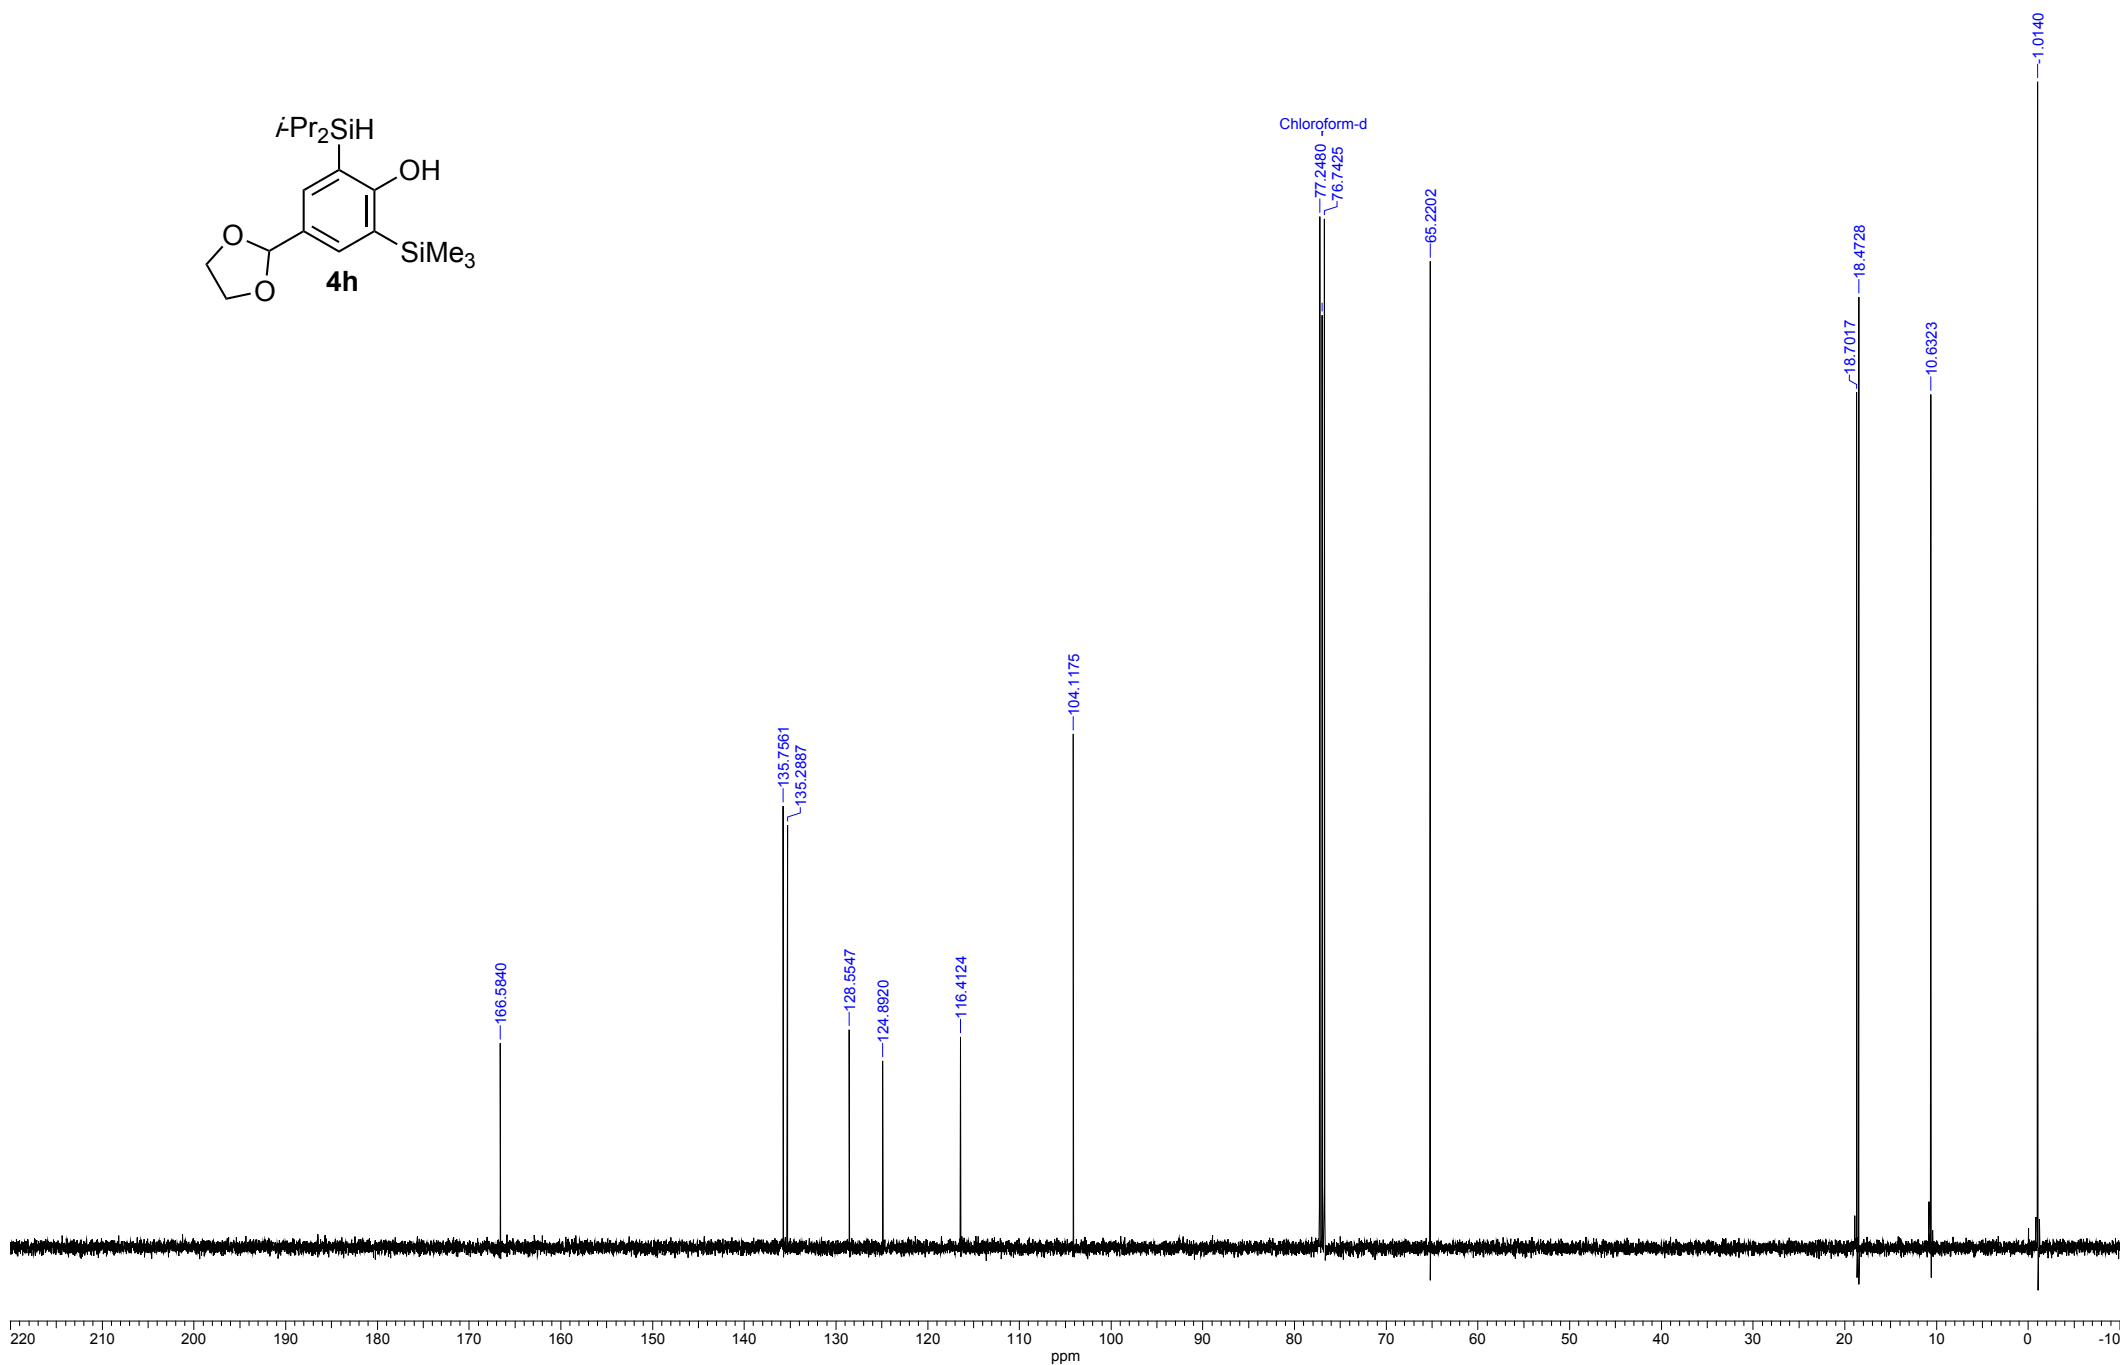

|                        |         |                        |                      |              |                                        |                 |                  |         |                |
|------------------------|---------|------------------------|----------------------|--------------|----------------------------------------|-----------------|------------------|---------|----------------|
| Acquisition Time (sec) | 3.4918  | Date                   | 05 Mar 2020 22:38:16 | File Name    | F:\NMR_CE_t_H\tawarani\TT0382-1H-1.als | Frequency (MHz) | 500.16           | Nucleus | <sup>1</sup> H |
| Number of Transients   | 8       | Original Points Count  | 26214                | Points Count | 26214                                  | Pulse Sequence  | single_pulse.ex2 | Solvent | CHLOROFORM-D   |
| Sweep Width (Hz)       | 7507.39 | Temperature (degree C) | 18.800               |              |                                        |                 |                  |         |                |

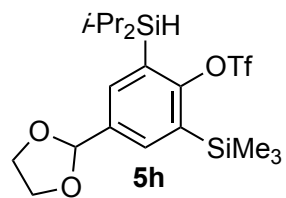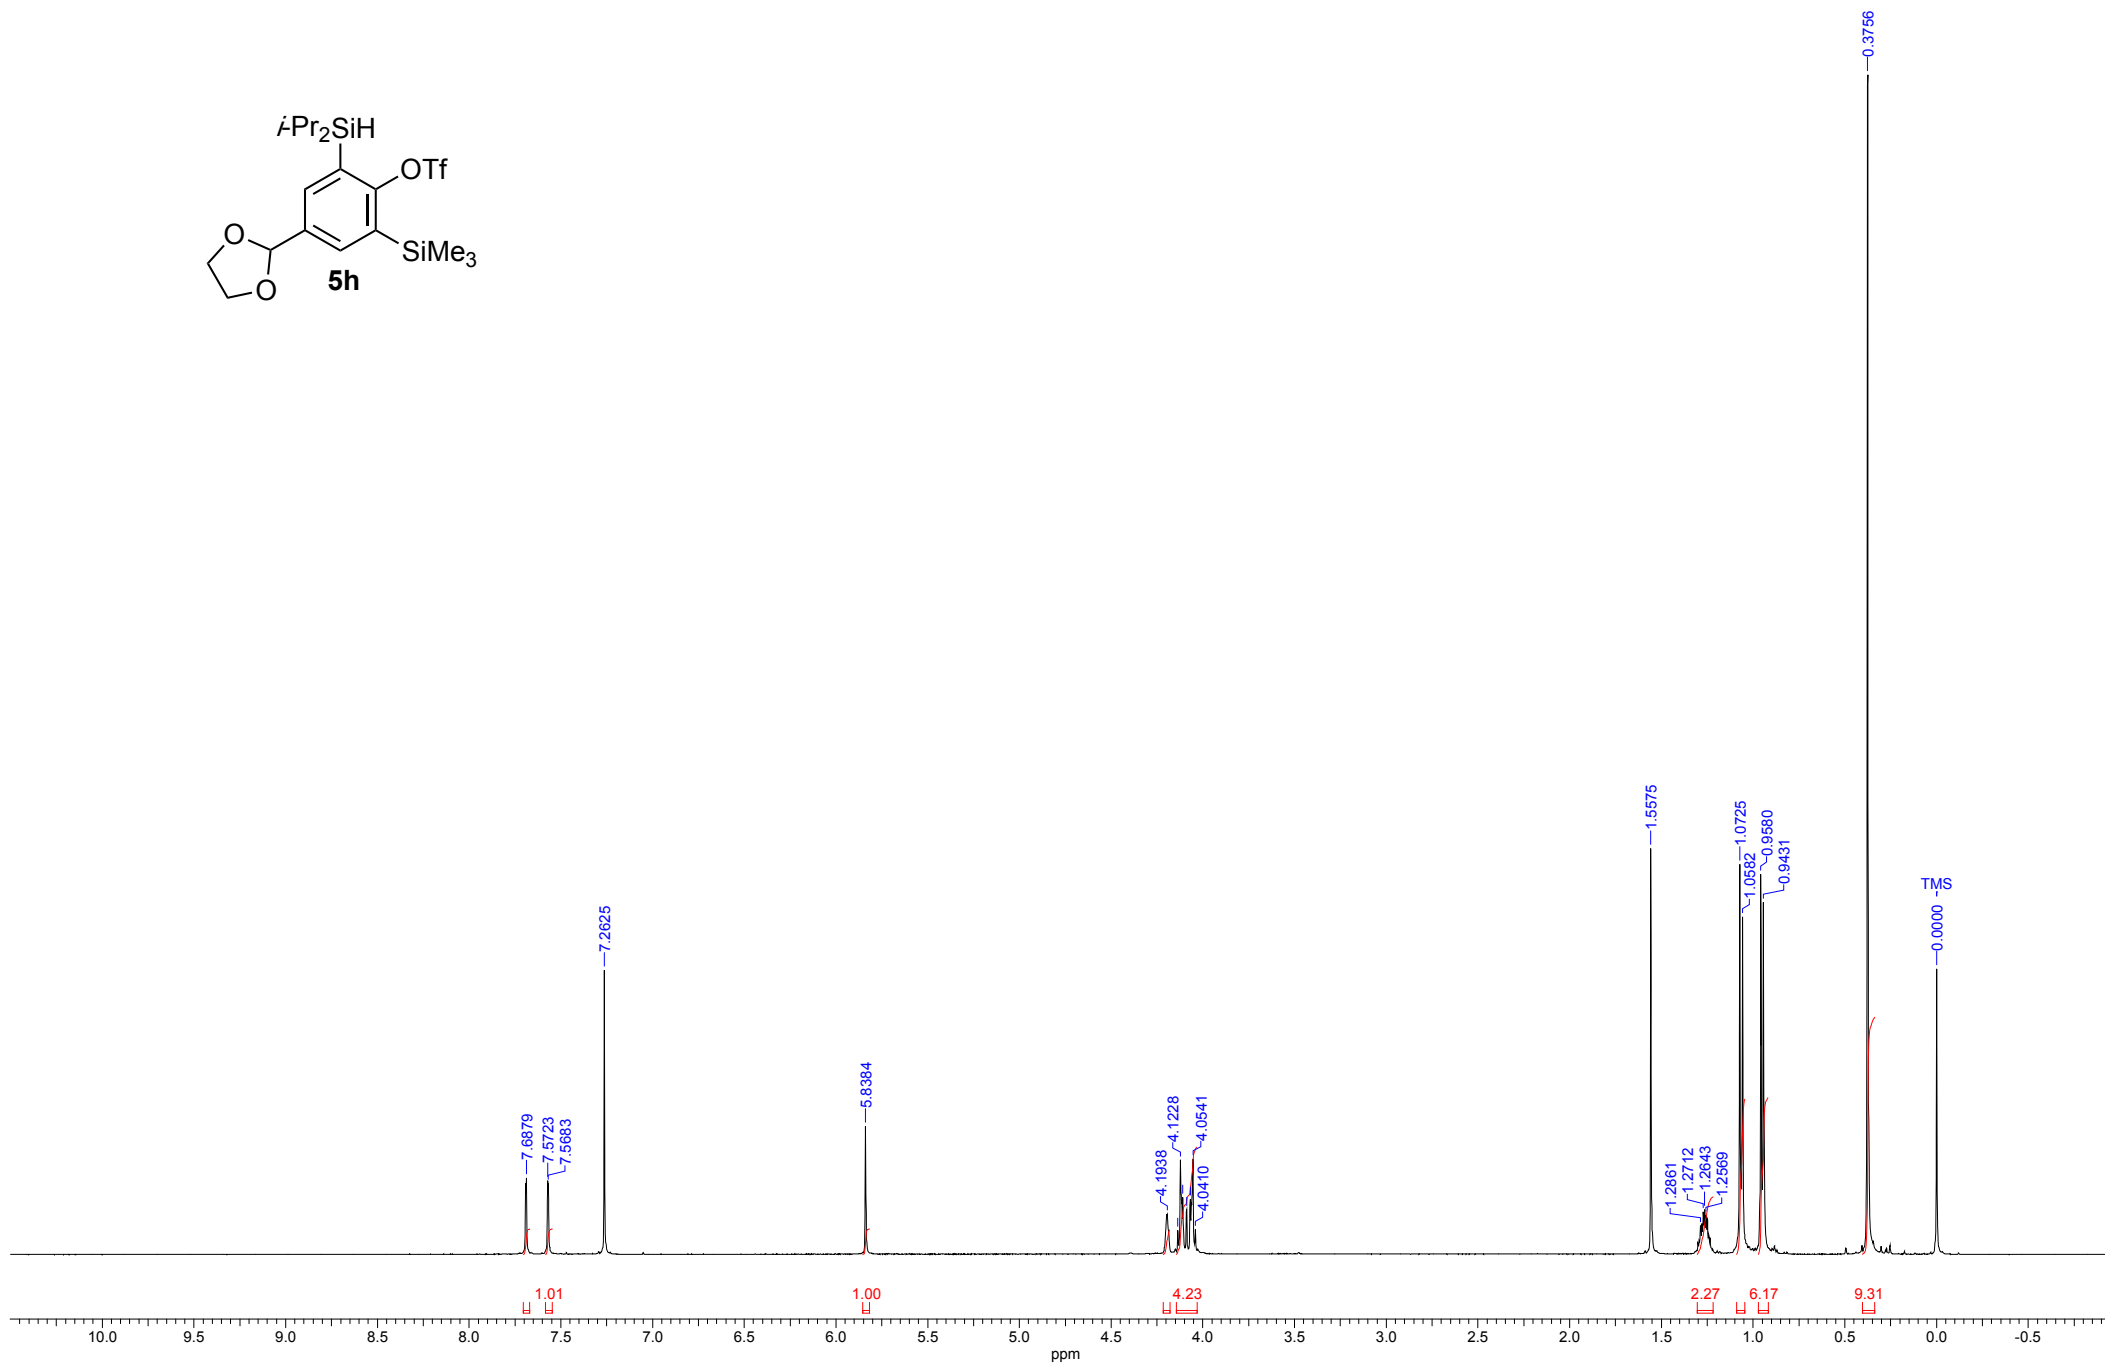



|                        |          |                        |                      |              |                                        |                 |                  |         |              |
|------------------------|----------|------------------------|----------------------|--------------|----------------------------------------|-----------------|------------------|---------|--------------|
| Acquisition Time (sec) | 0.8336   | Date                   | 05 Mar 2020 23:19:38 | File Name    | F:\NMR_CE_t_H\tawatar\TT0382-13C-1.als | Frequency (MHz) | 125.77           | Nucleus | 13C          |
| Number of Transients   | 256      | Original Points Count  | 26214                | Points Count | 26214                                  | Pulse Sequence  | single_pulse_dec | Solvent | CHLOROFORM-D |
| Sweep Width (Hz)       | 31446.06 | Temperature (degree C) | 19.000               |              |                                        |                 |                  |         |              |

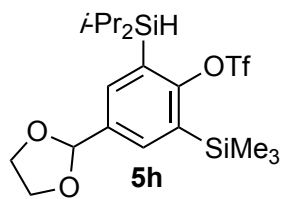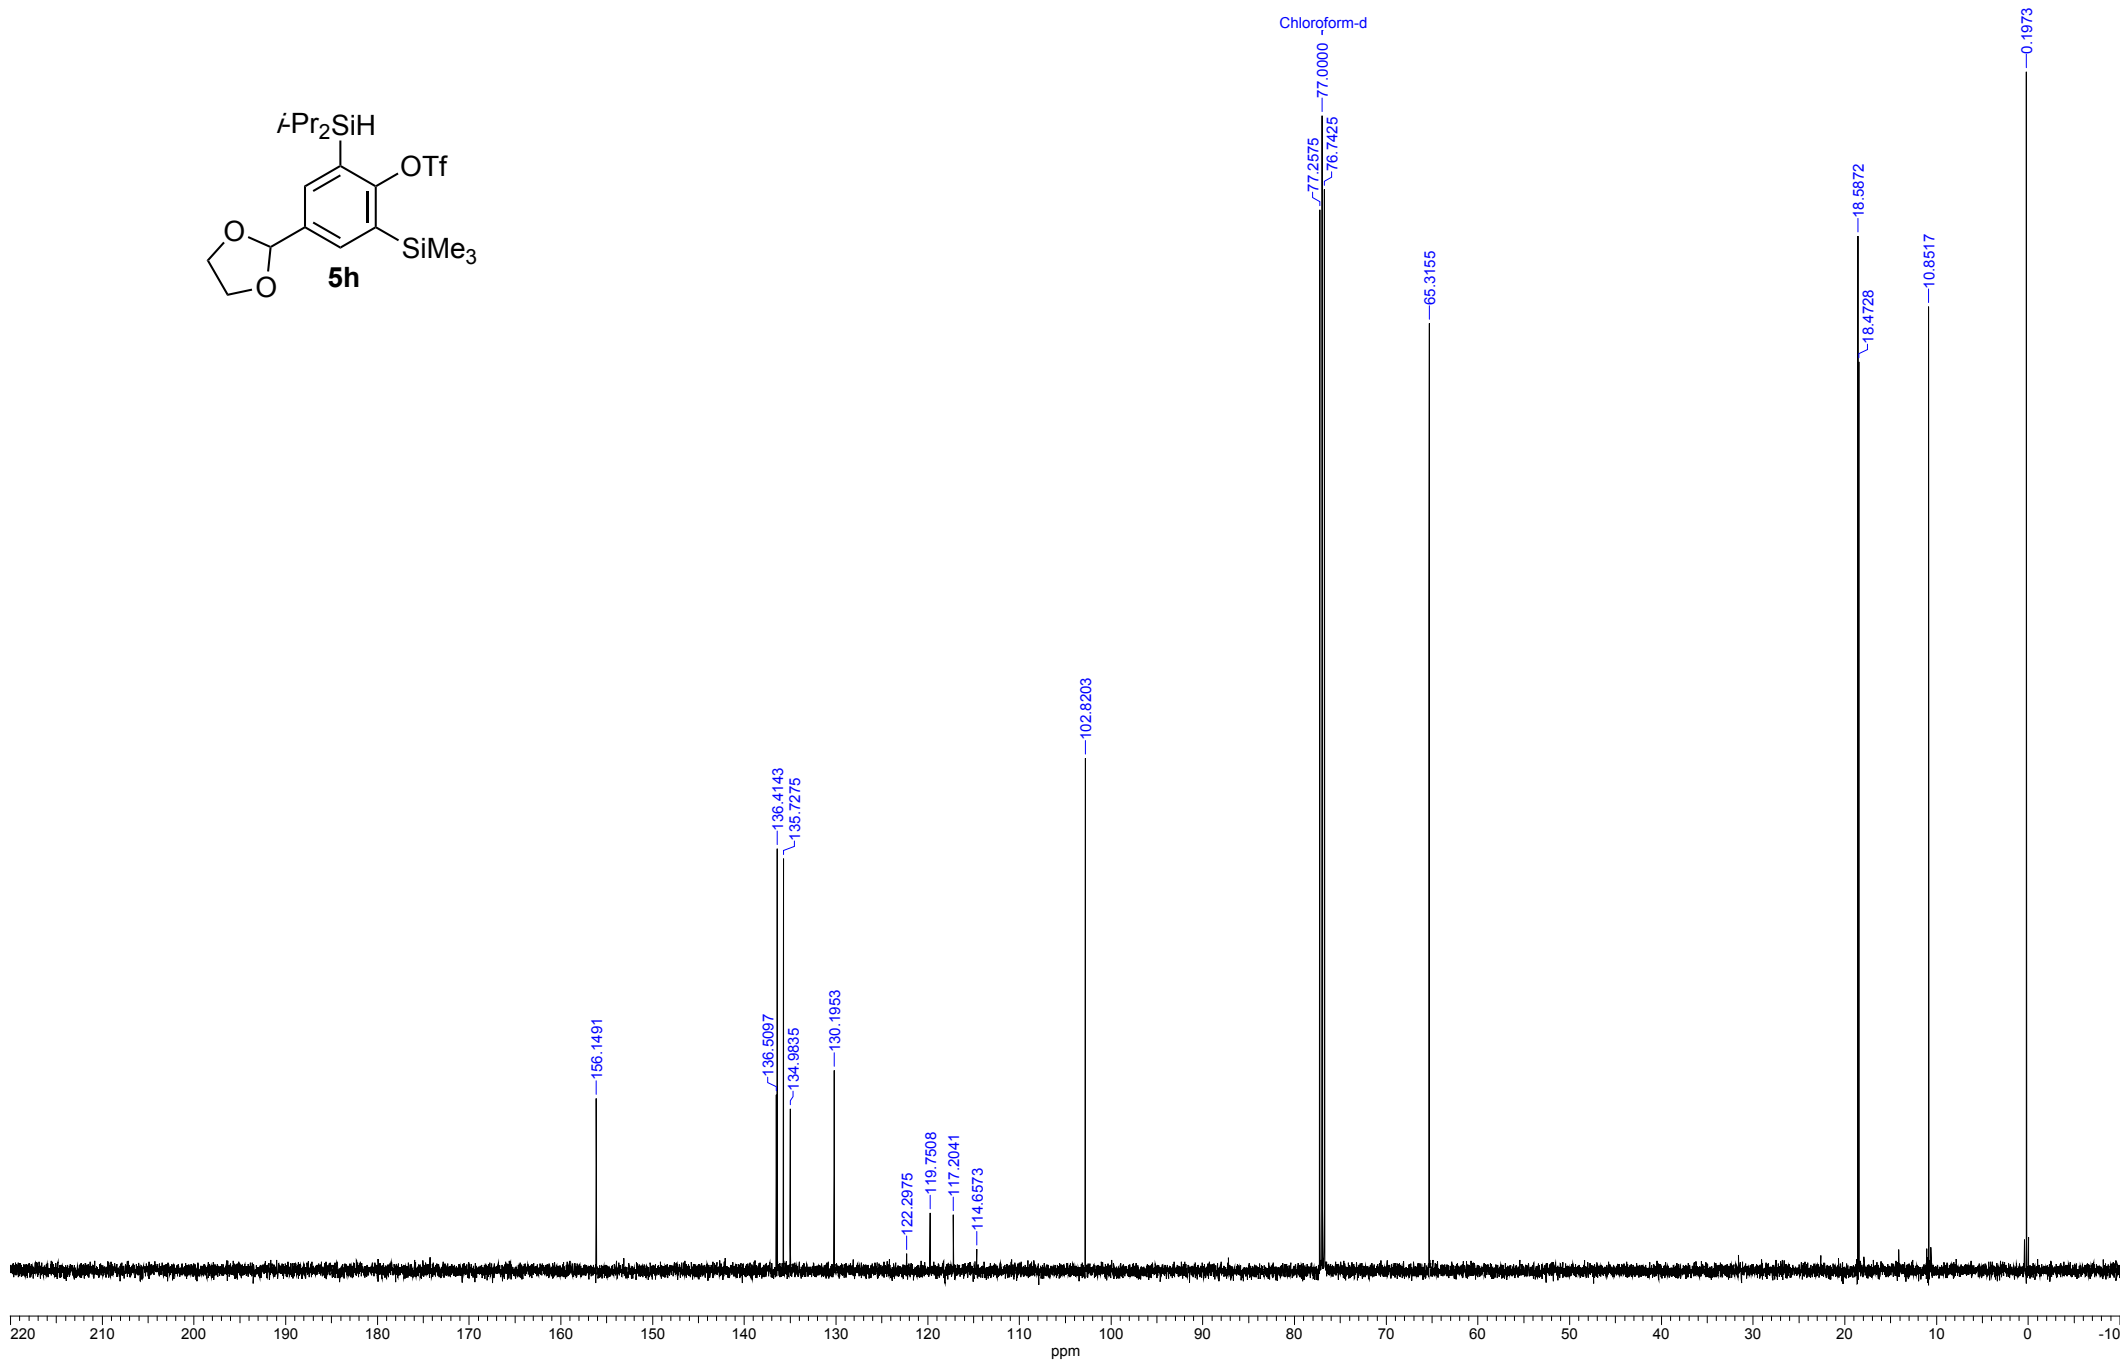

|                        |         |                        |              |                      |                      |                       |                                                  |              |
|------------------------|---------|------------------------|--------------|----------------------|----------------------|-----------------------|--------------------------------------------------|--------------|
| Acquisition Time (sec) | 1.8153  | Comment                | single pulse | Date                 | 22 Jun 2021 23:41:20 | File Name             | F:\NMR CE t H \tawatari\TT0542-1H_proton-1-1.als |              |
| Frequency (MHz)        | 600.17  | Nucleus                | 1H           | Number of Transients | 8                    | Original Points Count | 16384                                            |              |
| Sweep Width (Hz)       | 9025.27 | Temperature (degree C) | 21.300       | Points Count         | 13120                | Pulse Sequence        | proton.jxp                                       |              |
|                        |         |                        |              |                      |                      |                       | Solvent                                          | CHLOROFORM-D |

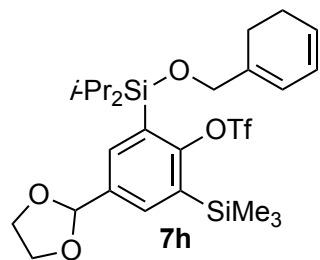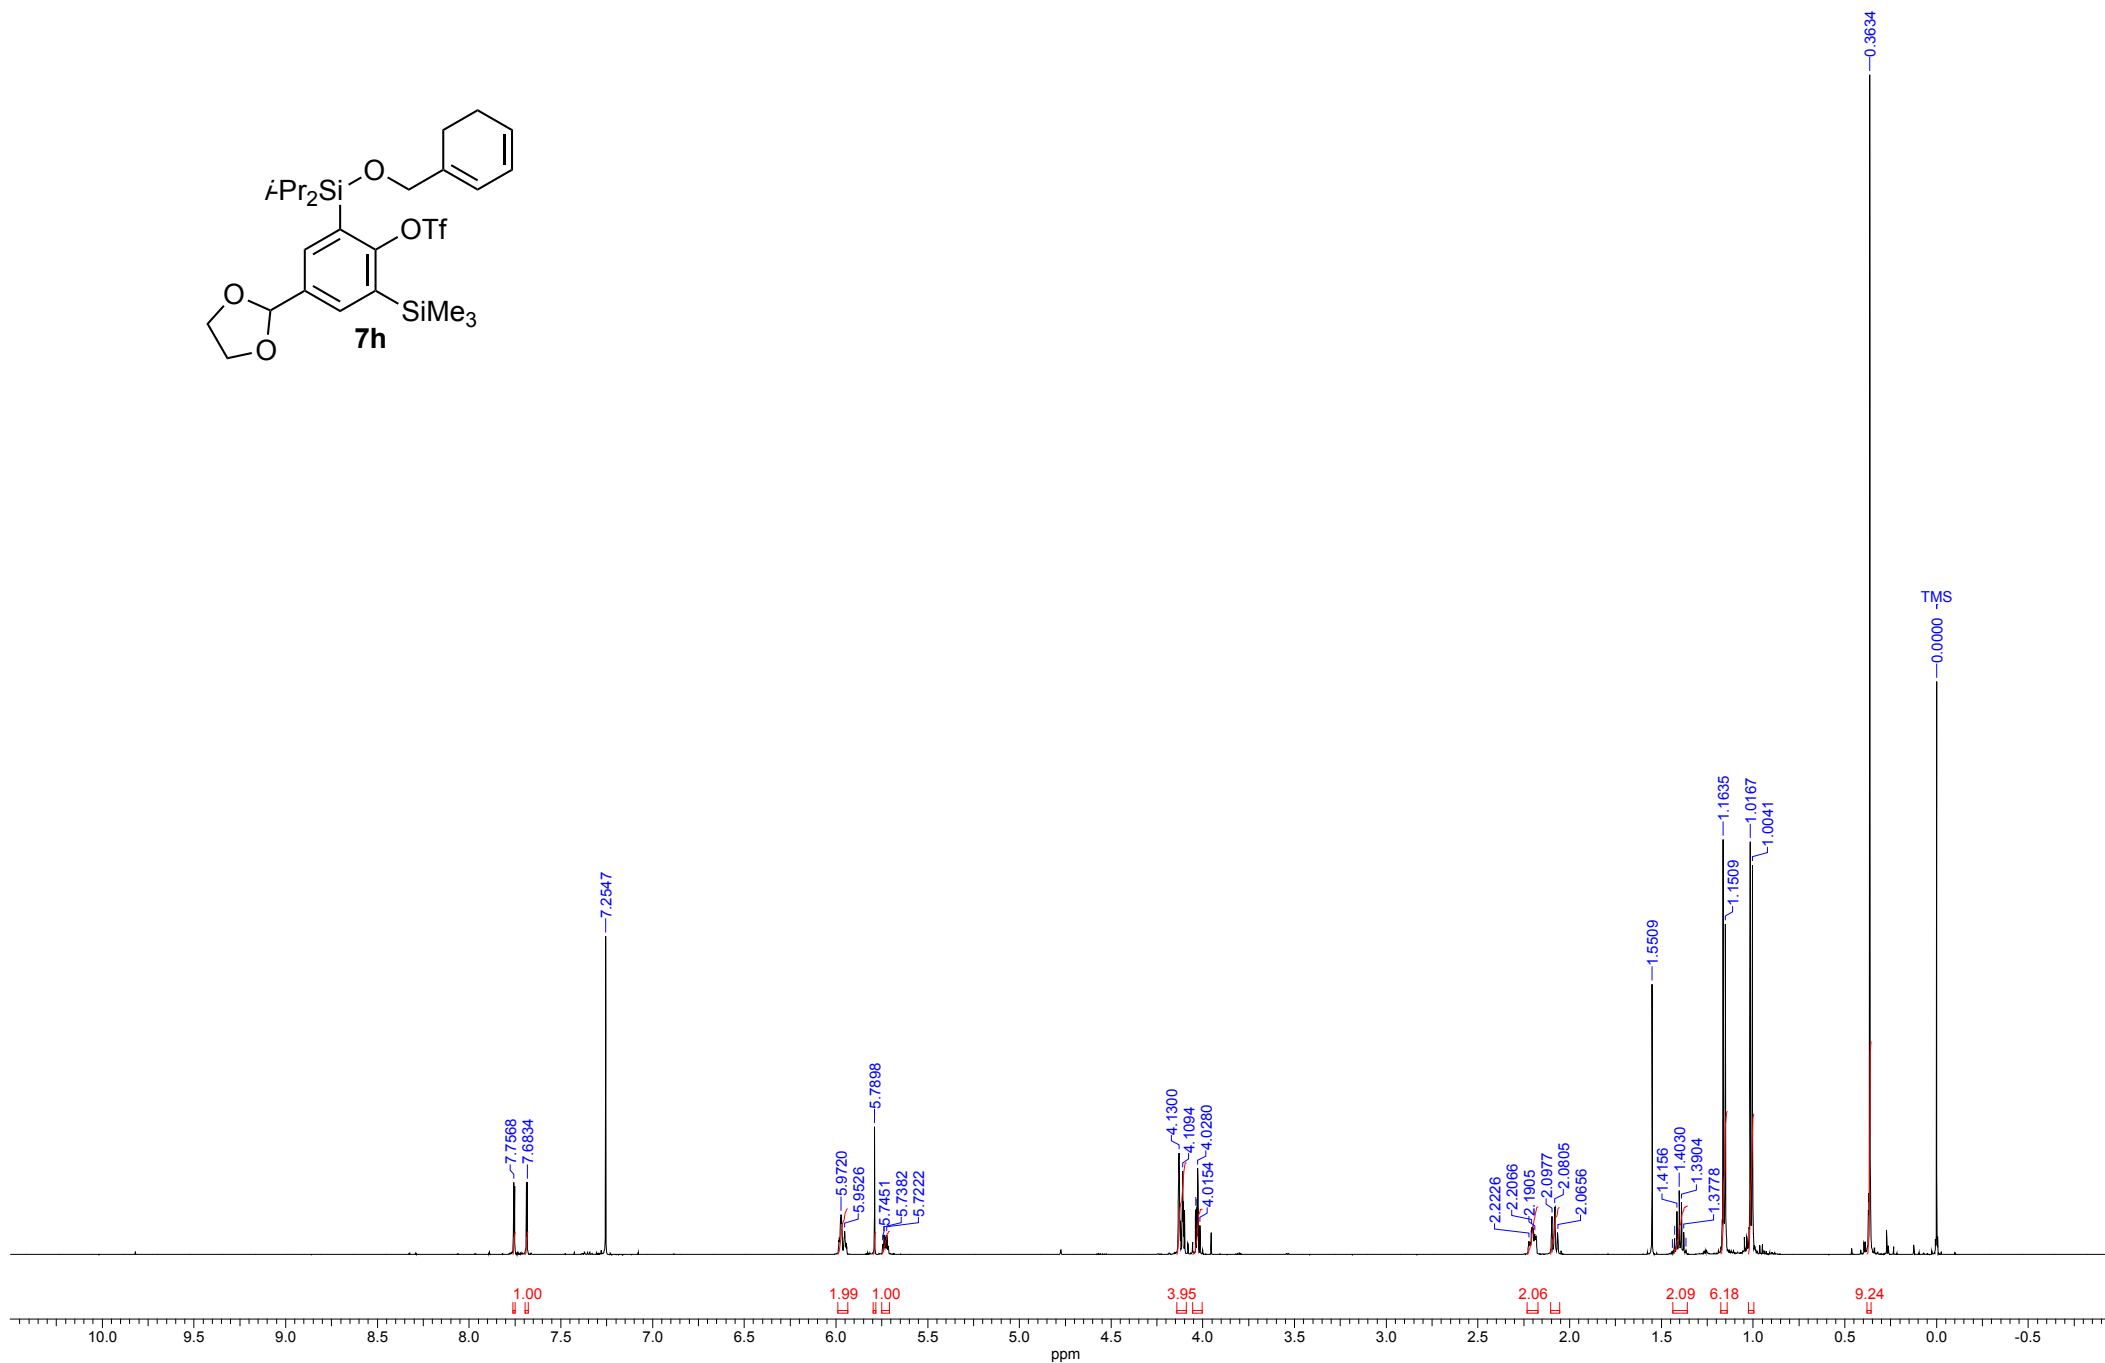

|                        |          |                        |                                  |                       |                      |              |                                                |
|------------------------|----------|------------------------|----------------------------------|-----------------------|----------------------|--------------|------------------------------------------------|
| Acquisition Time (sec) | 0.6921   | Comment                | single pulse decoupled gated NOE | Date                  | 26 Aug 2020 16:42:48 | File Name    | F:\NMR_CE_t_H\tawatari\TT0542-13C carbon-1.als |
| Frequency (MHz)        | 150.00   | Number of Transients   | 449                              | Original Points Count | 26214                | Points Count | 26214                                          |
| Sweep Width (Hz)       | 37876.77 | Temperature (degree C) | 21.400                           | Pulse Sequence        | carbon_cool.jxp      | Solvent      | CHLOROFORM-D                                   |

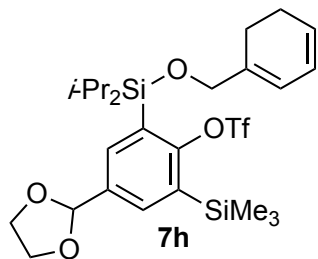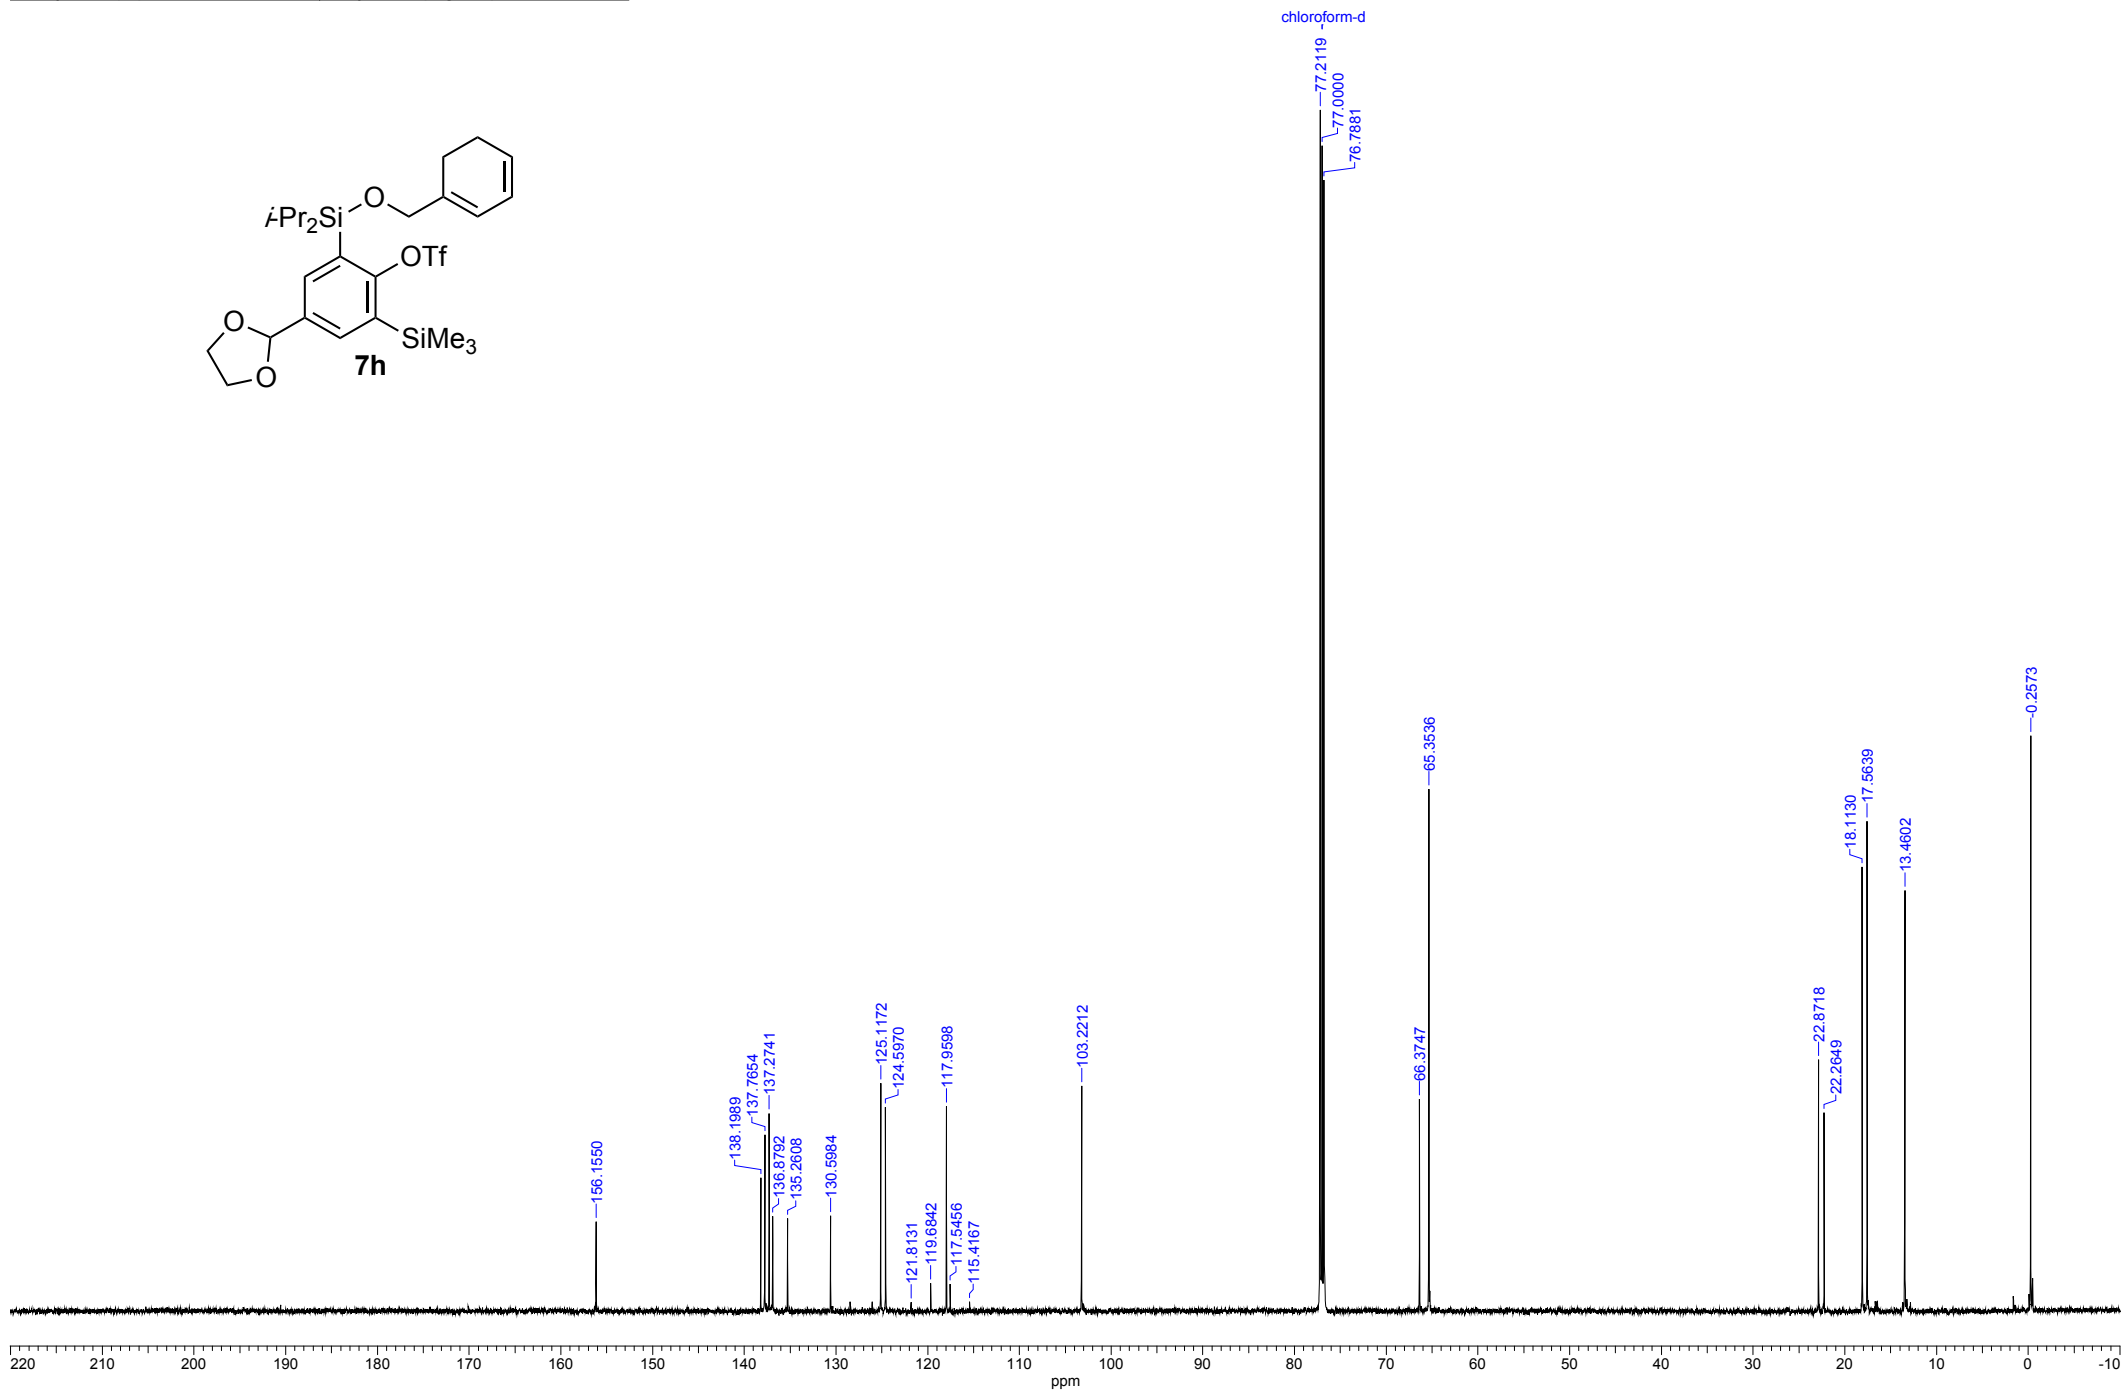

|                        |         |                        |              |                      |                      |                       |                                                  |
|------------------------|---------|------------------------|--------------|----------------------|----------------------|-----------------------|--------------------------------------------------|
| Acquisition Time (sec) | 1.8153  | Comment                | single pulse | Date                 | 04 Dec 2020 22:10:38 | File Name             | F:\NMR CE t H \tawatari\TT0537-1H_proton-1-1.als |
| Frequency (MHz)        | 600.17  | Nucleus                | 1H           | Number of Transients | 8                    | Original Points Count | 16384                                            |
| Sweep Width (Hz)       | 9025.27 | Temperature (degree C) | 21.300       | Points Count         | 13120                | Pulse Sequence        | proton.jxp                                       |
|                        |         |                        |              |                      |                      | Solvent               | CHLOROFORM-D                                     |

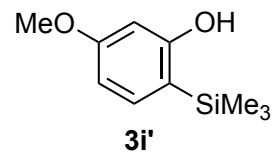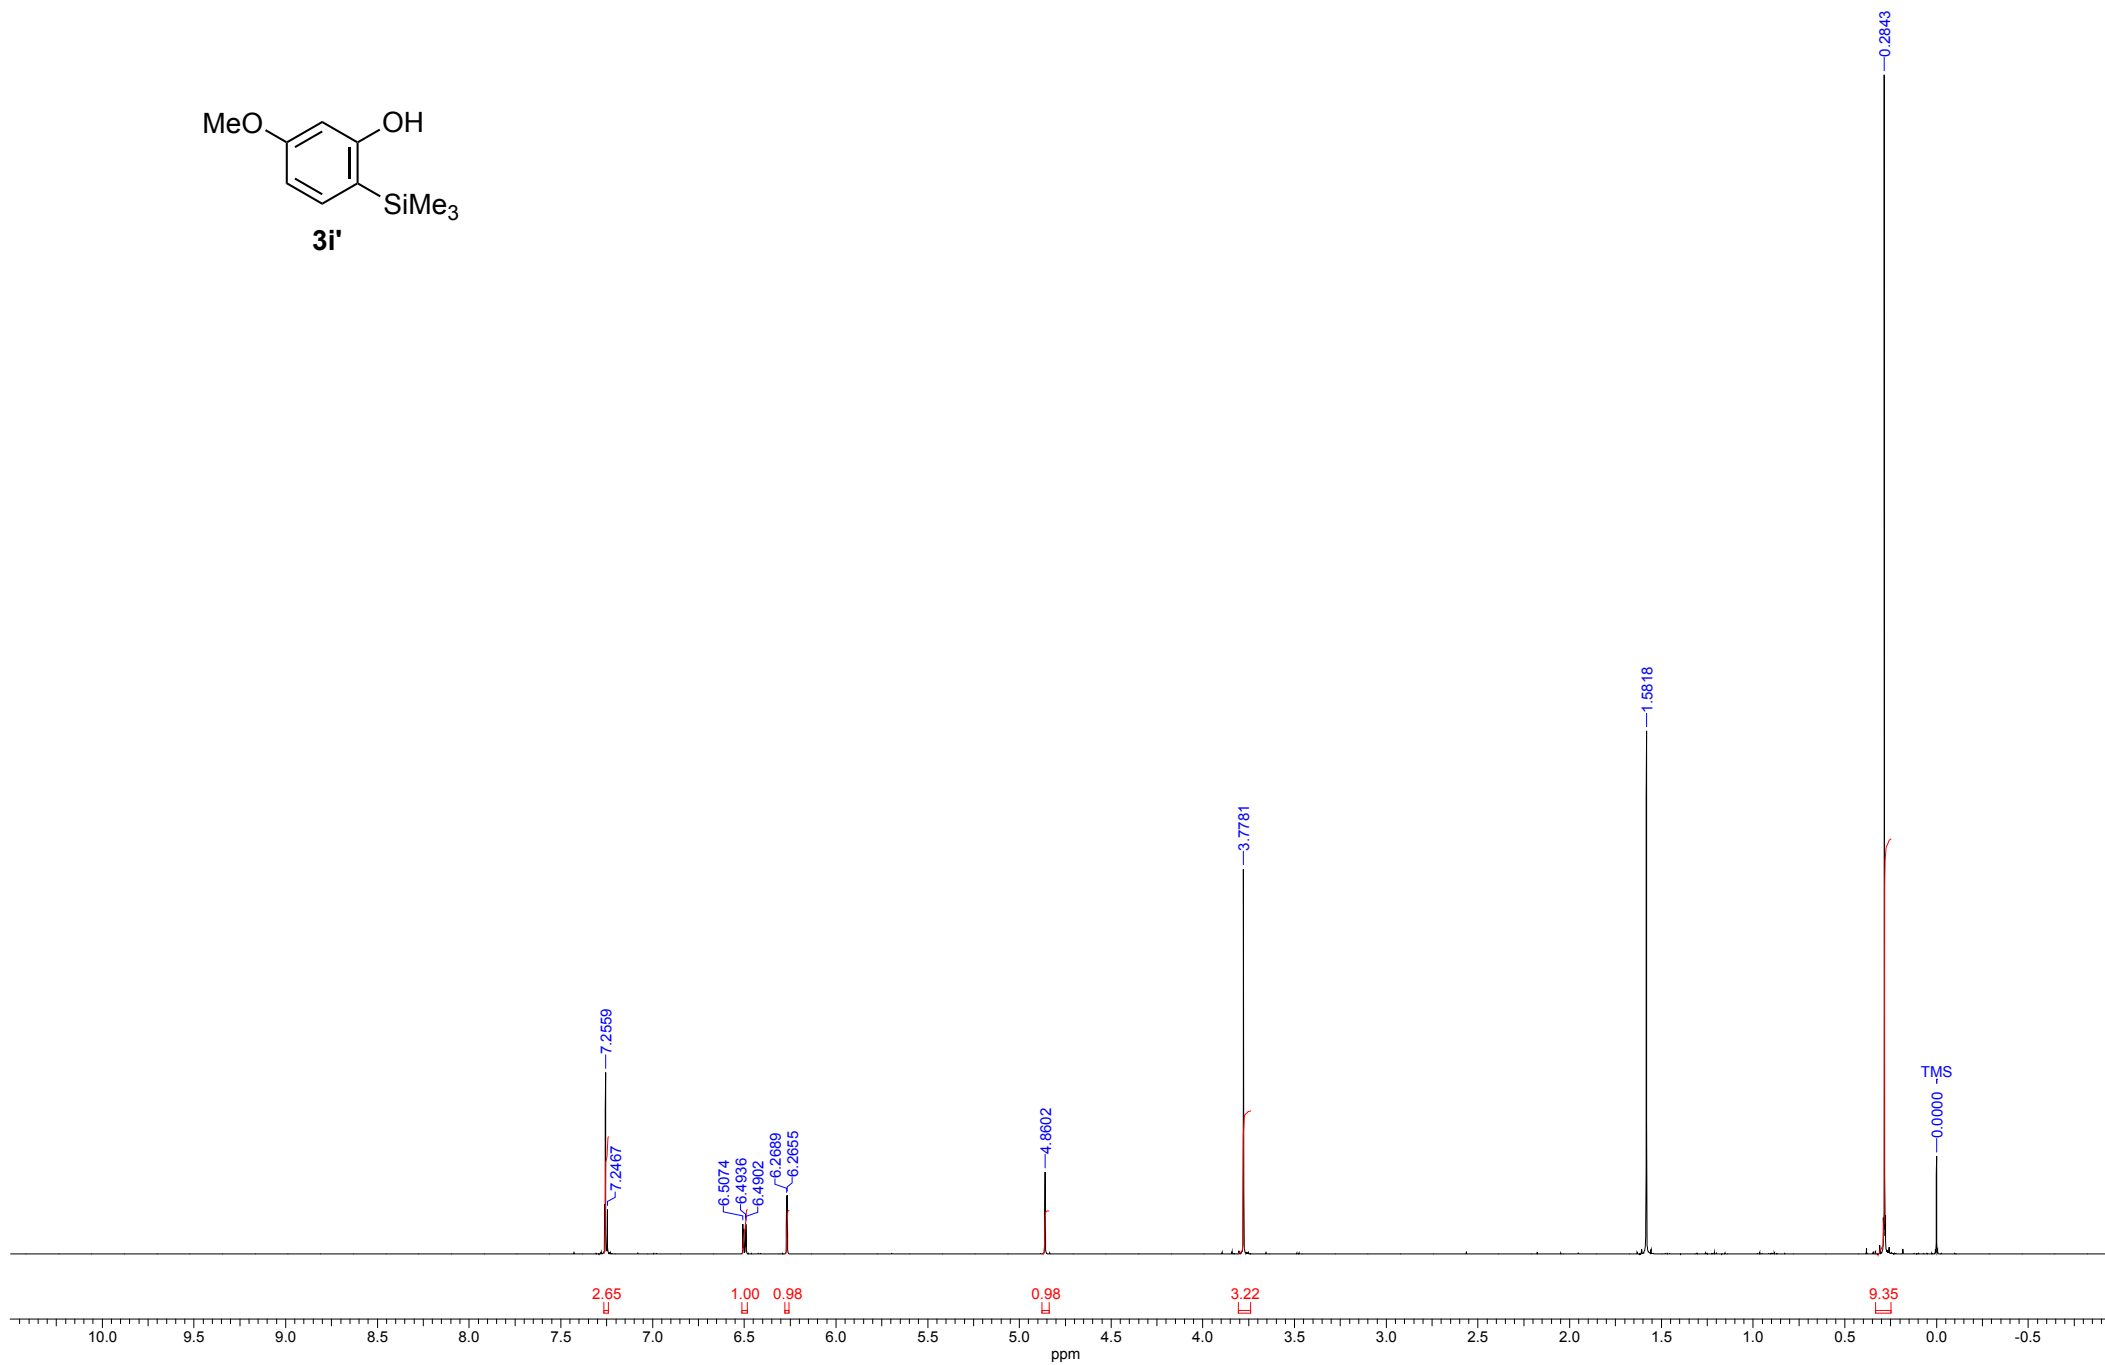

|                        |          |                        |                                  |                       |                      |              |                                                |
|------------------------|----------|------------------------|----------------------------------|-----------------------|----------------------|--------------|------------------------------------------------|
| Acquisition Time (sec) | 0.6921   | Comment                | single pulse decoupled gated NOE | Date                  | 04 Dec 2020 22:14:06 | File Name    | F:\NMR_CE_t_H\tawatari\TT0537-13C_carbon-1.als |
| Frequency (MHz)        | 150.00   | Number of Transients   | 421                              | Original Points Count | 26214                | Points Count | 26214                                          |
| Sweep Width (Hz)       | 37876.77 | Temperature (degree C) | 21.400                           | Pulse Sequence        | carbon_cool.jxp      | Solvent      | CHLOROFORM-D                                   |

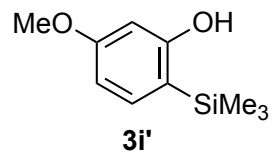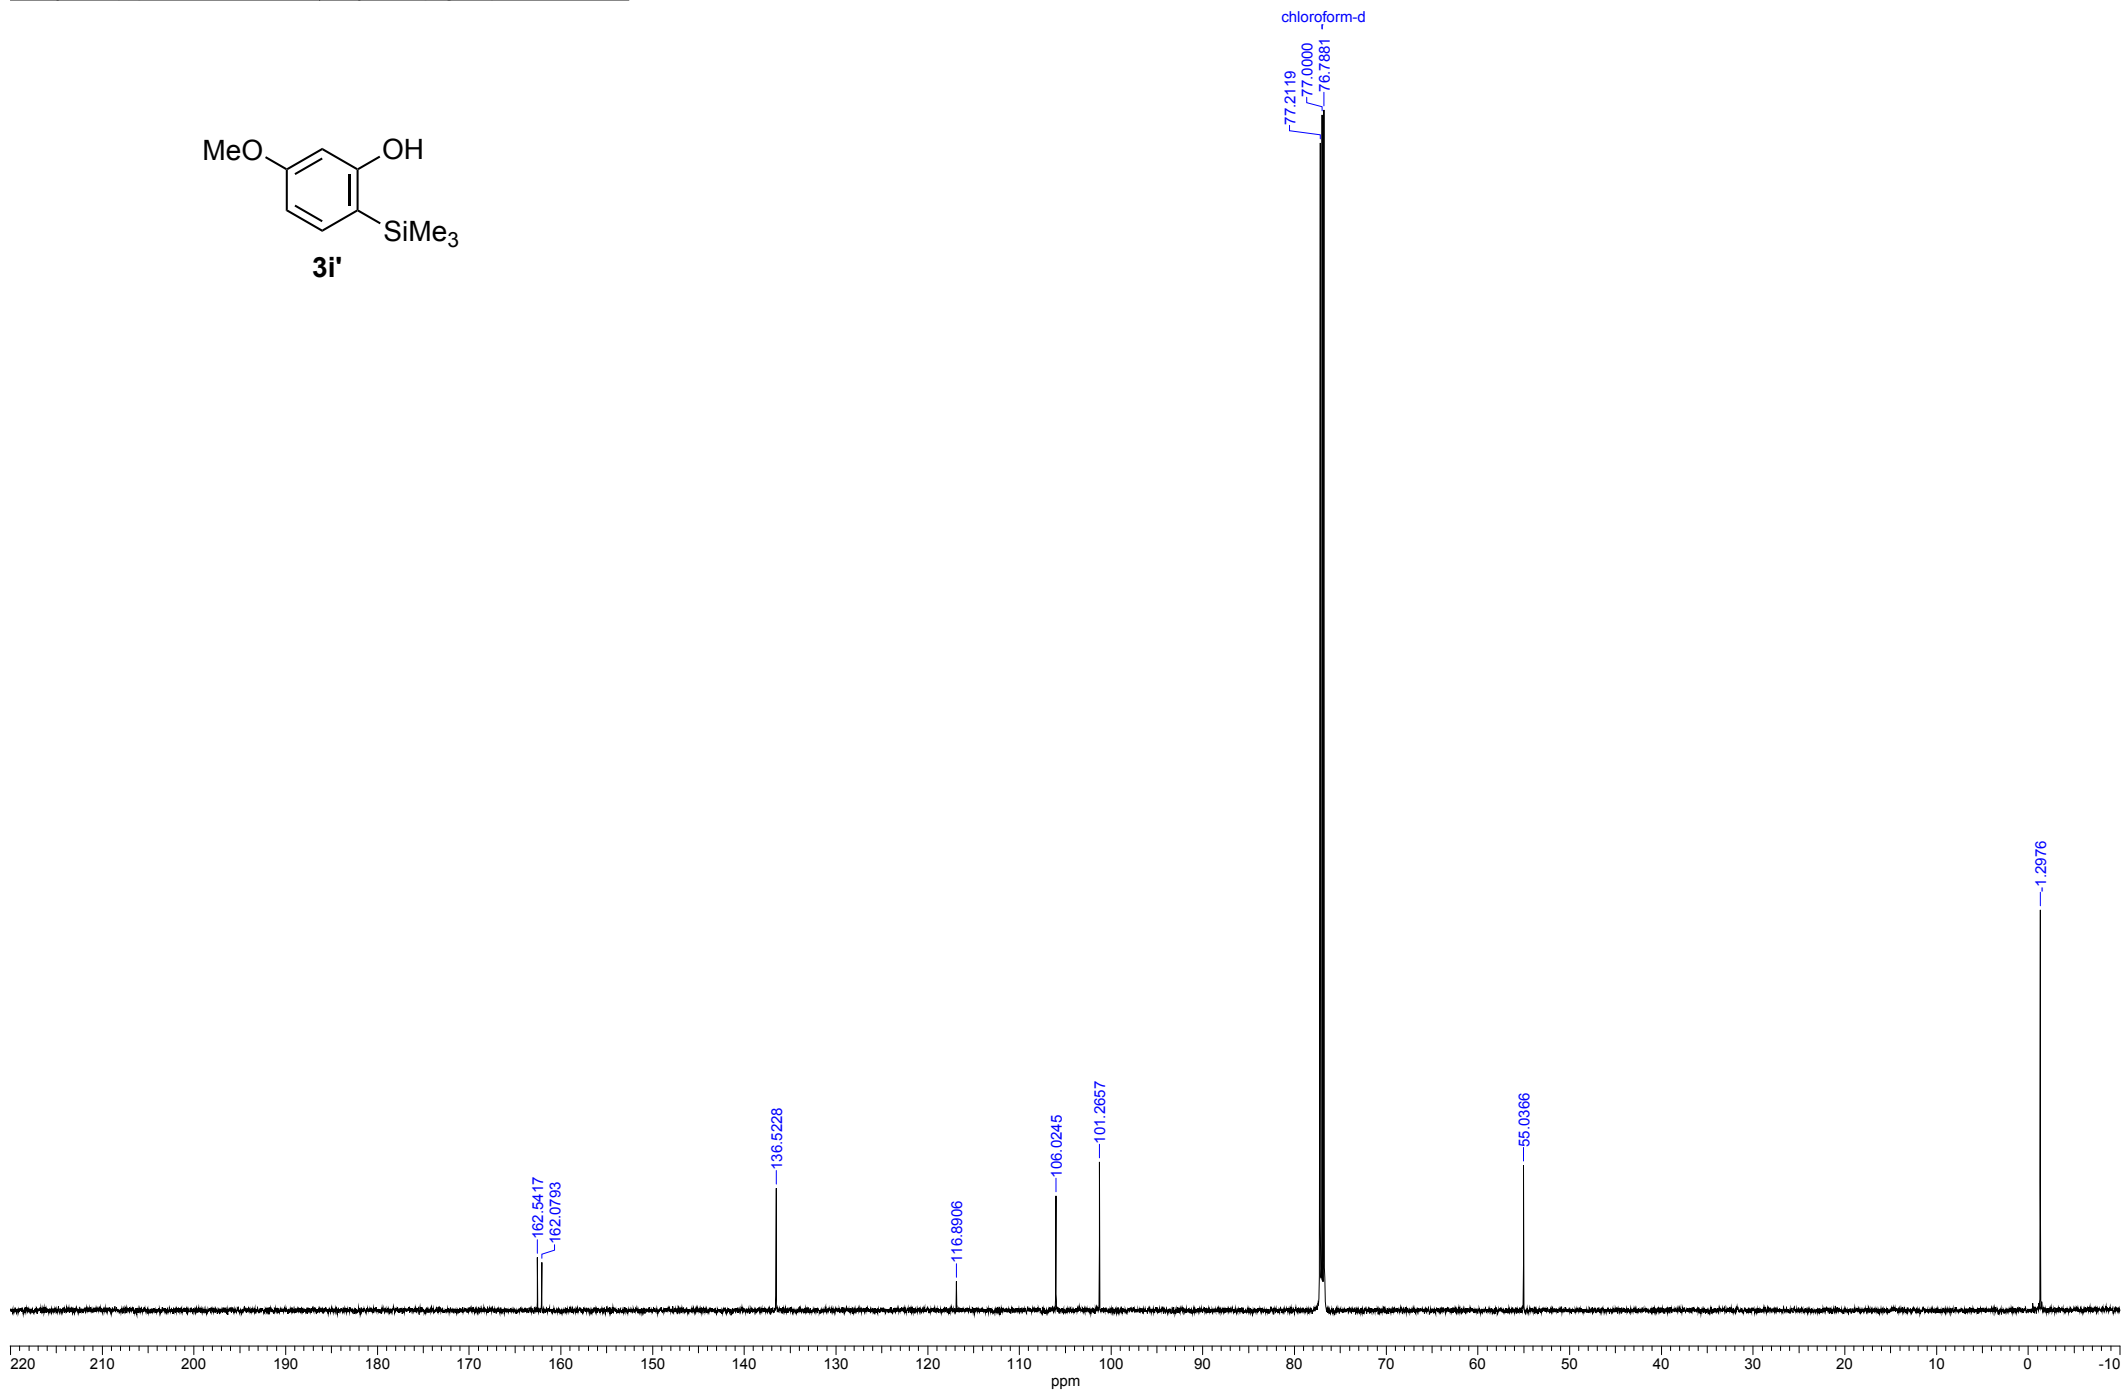

|                        |         |                        |              |                      |                      |                       |                                                  |
|------------------------|---------|------------------------|--------------|----------------------|----------------------|-----------------------|--------------------------------------------------|
| Acquisition Time (sec) | 1.8153  | Comment                | single pulse | Date                 | 04 Dec 2020 22:20:00 | File Name             | F:\NMR CE t H \tawatari\TT0538-1H_proton-1-1.als |
| Frequency (MHz)        | 600.17  | Nucleus                | 1H           | Number of Transients | 8                    | Original Points Count | 16384                                            |
| Sweep Width (Hz)       | 9025.27 | Temperature (degree C) | 21.100       | Points Count         | 13120                | Pulse Sequence        | proton.jxp                                       |
|                        |         |                        |              |                      |                      | Solvent               | CHLOROFORM-D                                     |

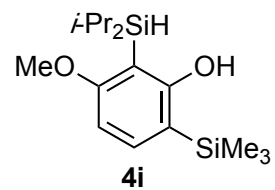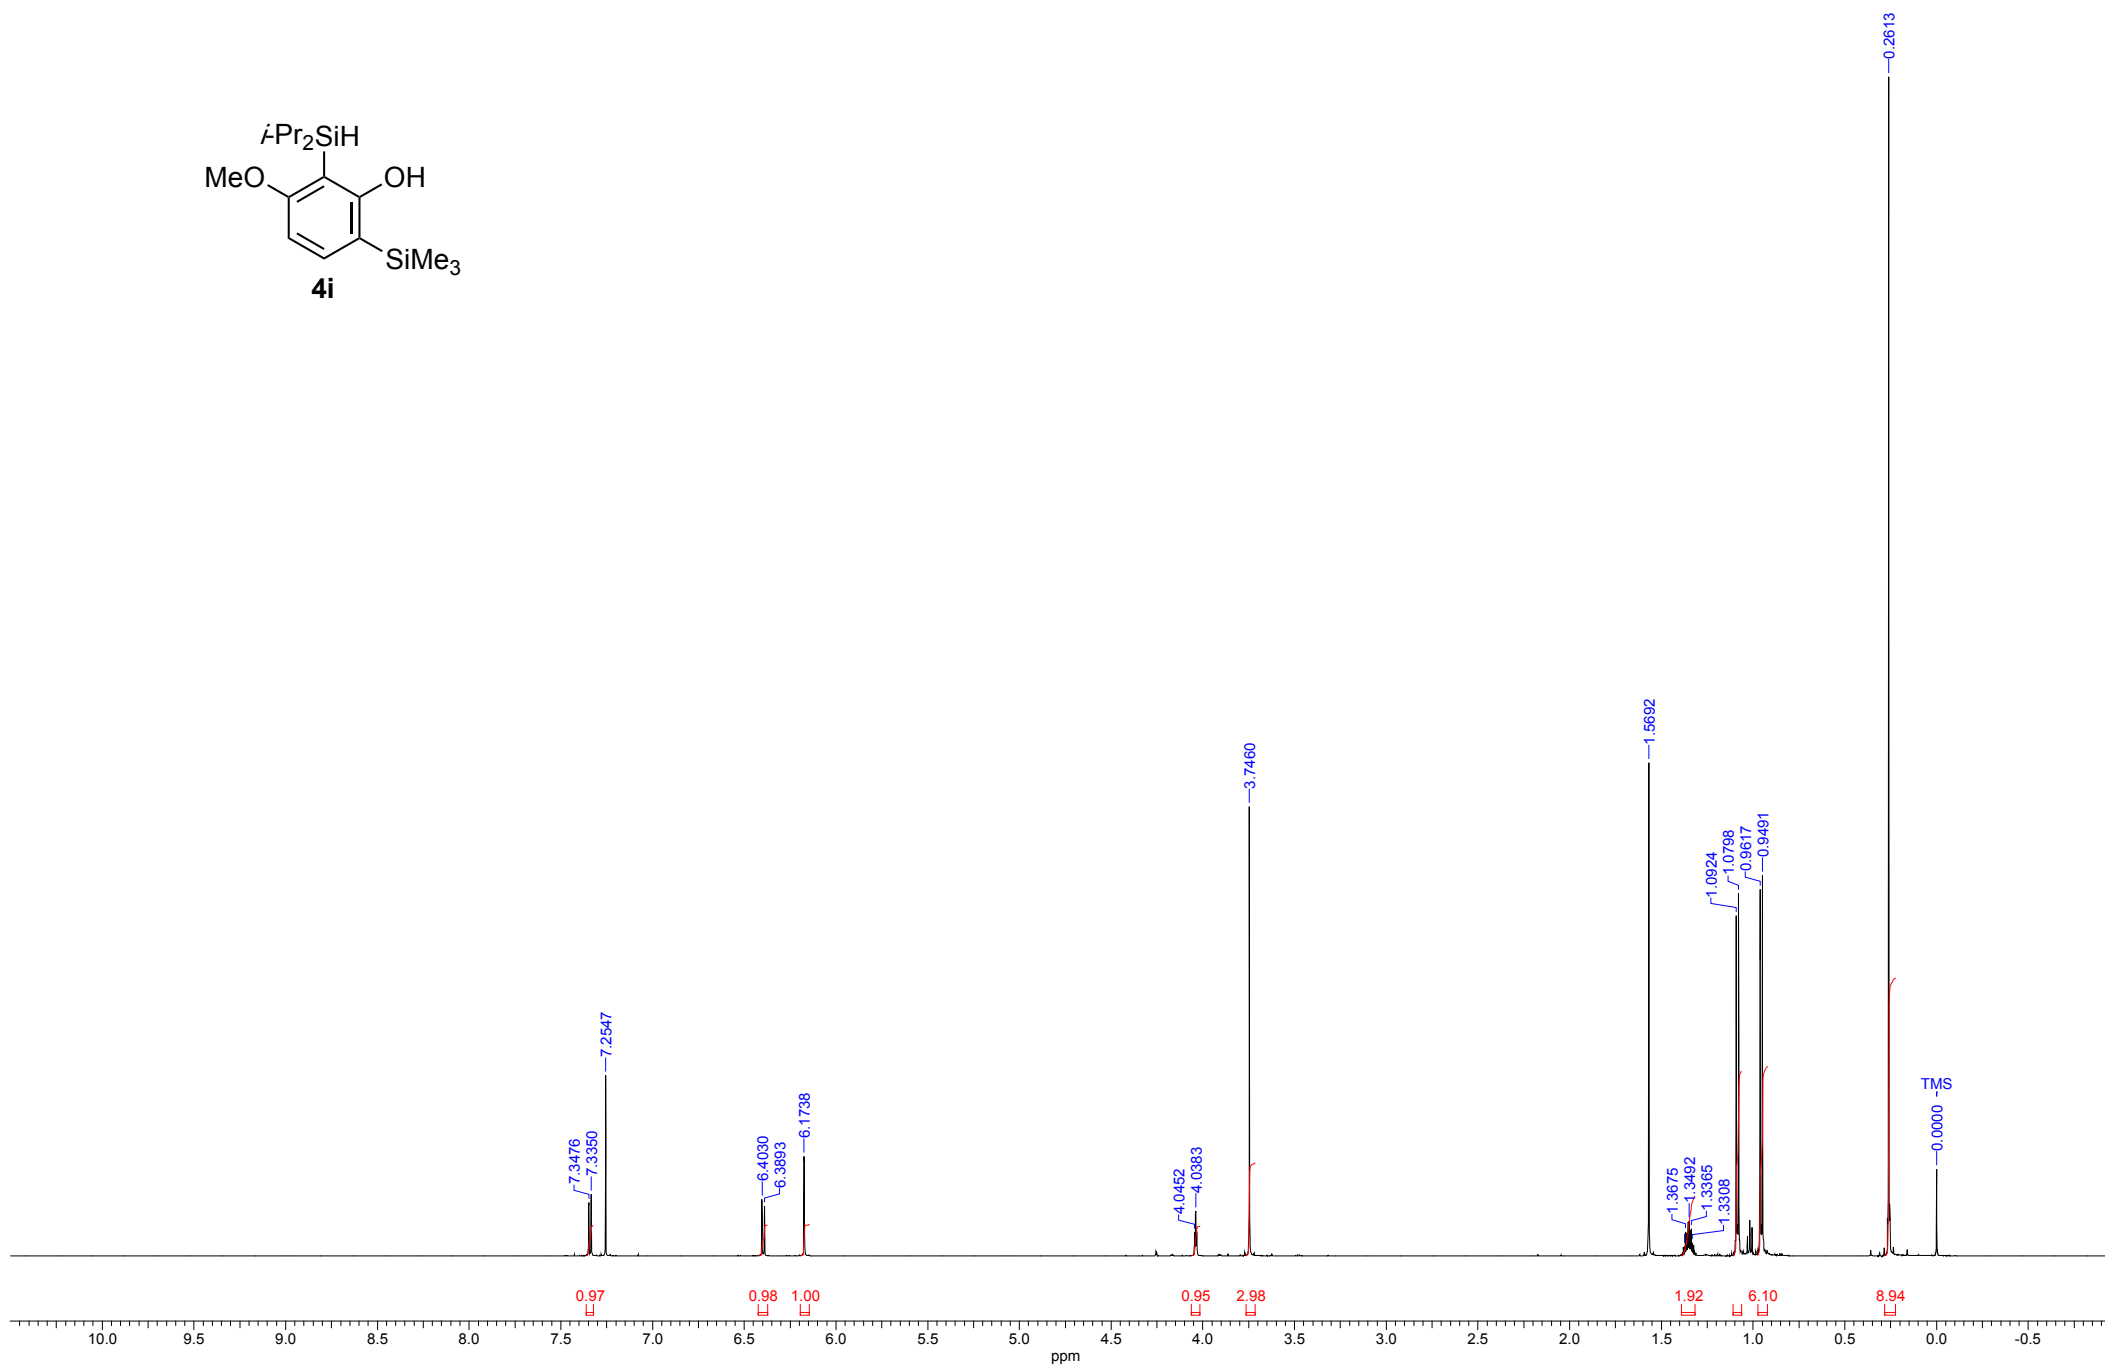

|                        |          |                        |                                  |                       |                      |              |                                                |
|------------------------|----------|------------------------|----------------------------------|-----------------------|----------------------|--------------|------------------------------------------------|
| Acquisition Time (sec) | 0.6921   | Comment                | single pulse decoupled gated NOE | Date                  | 04 Dec 2020 22:27:22 | File Name    | F:\NMR_CE_t_H\tawatari\TT0538-13C carbon-1.als |
| Frequency (MHz)        | 150.00   | Number of Transients   | 349                              | Original Points Count | 26214                | Points Count | 26214                                          |
| Sweep Width (Hz)       | 37876.77 | Temperature (degree C) | 21.200                           | Pulse Sequence        | carbon_cool.jxp      | Solvent      | CHLOROFORM-D                                   |

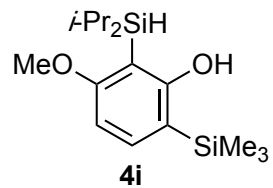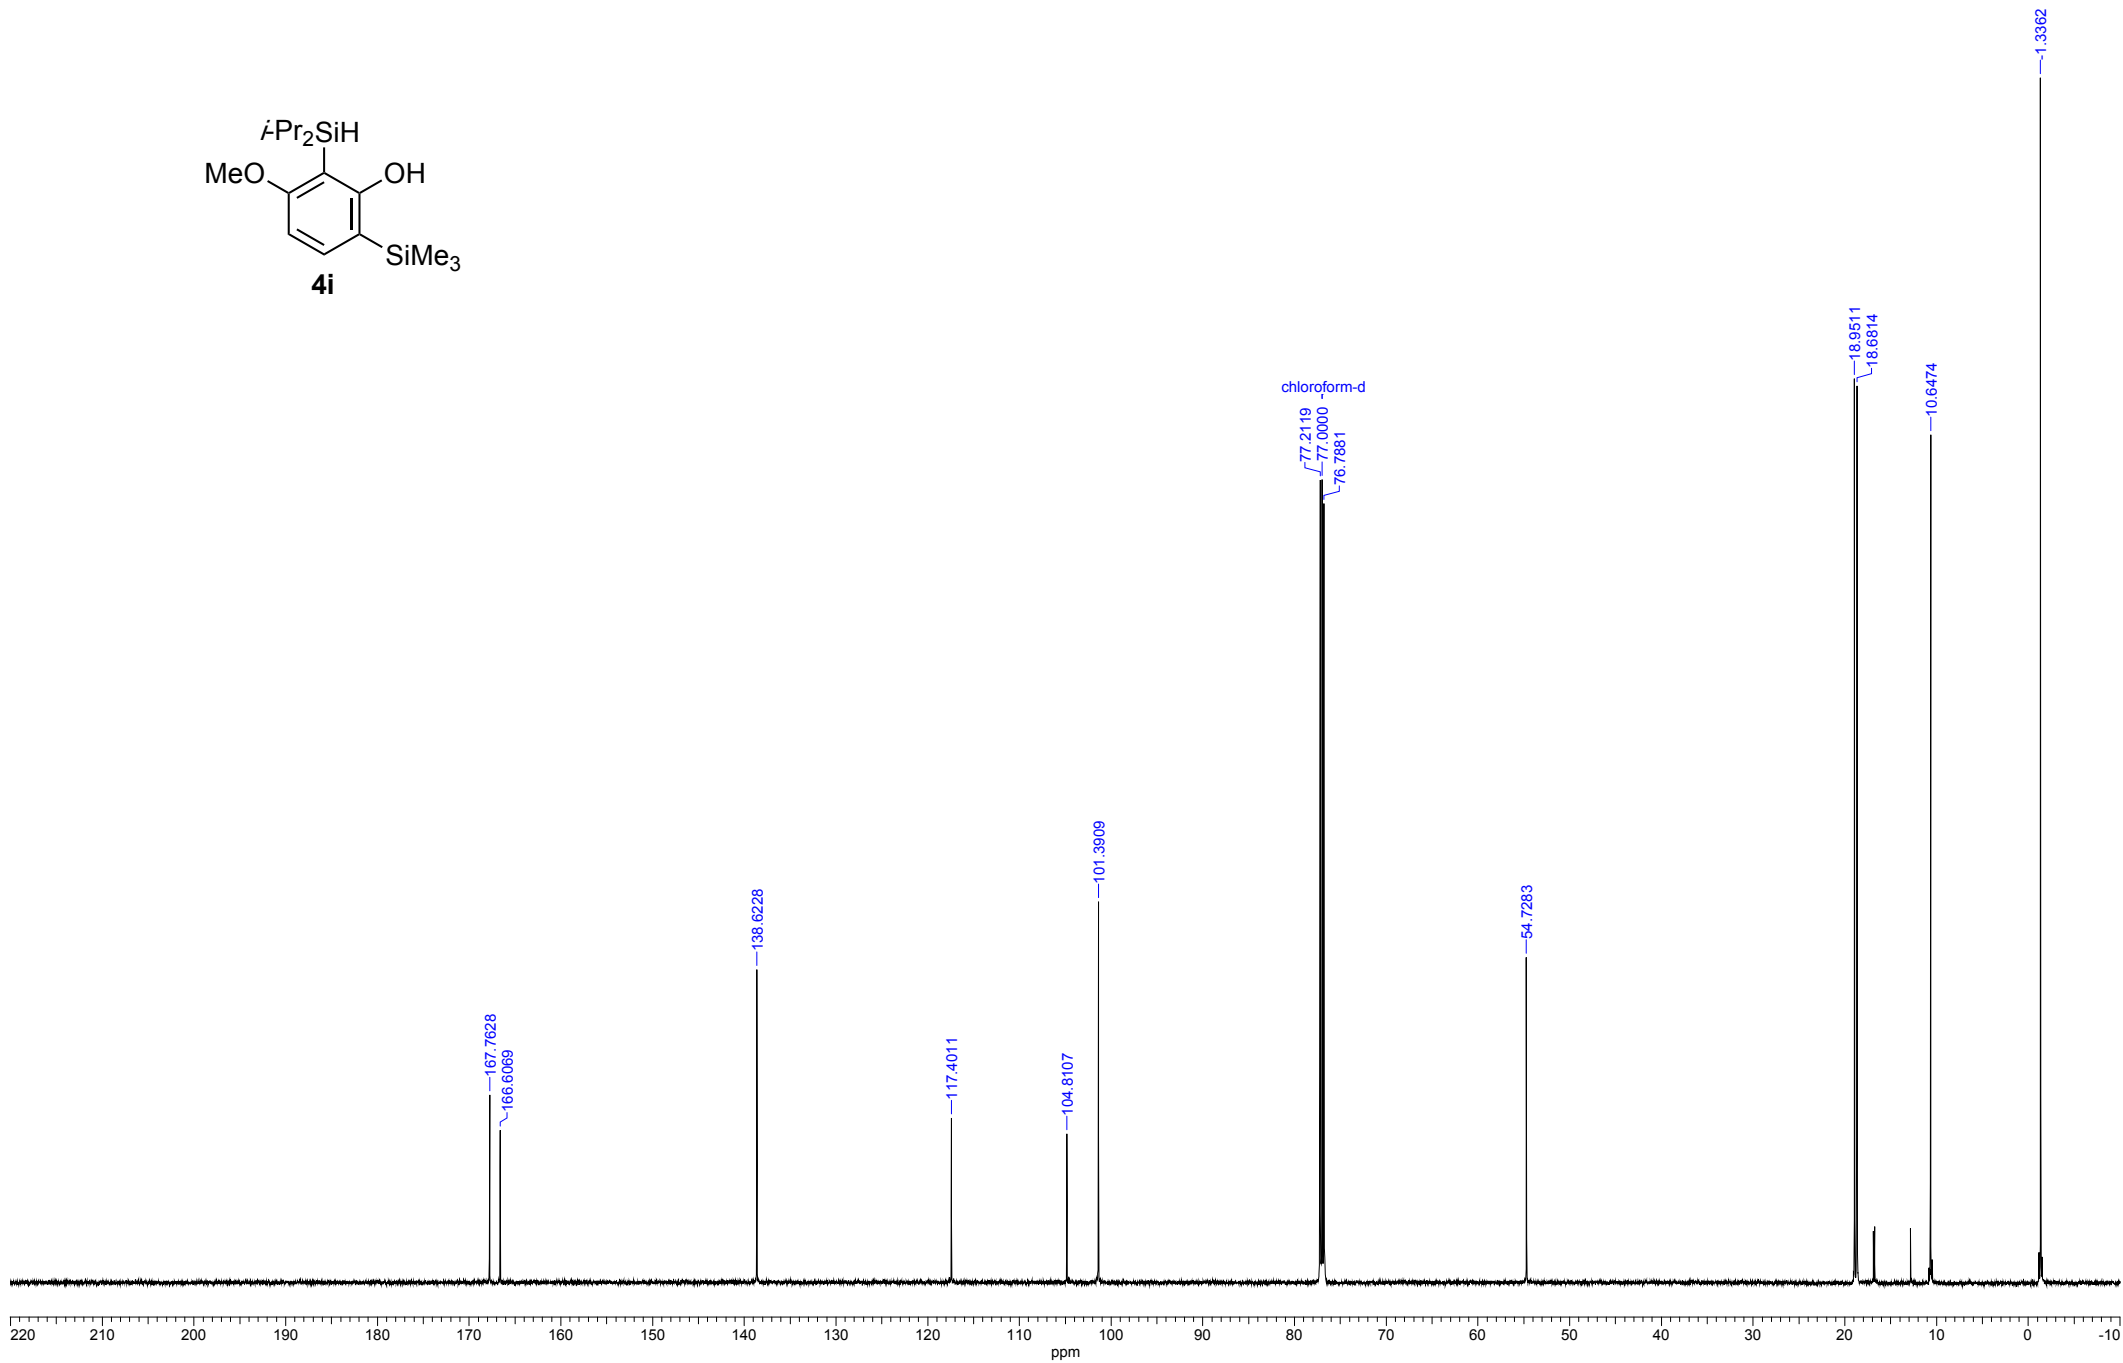

|                        |         |                        |              |                      |                      |                       |                                                  |              |
|------------------------|---------|------------------------|--------------|----------------------|----------------------|-----------------------|--------------------------------------------------|--------------|
| Acquisition Time (sec) | 1.8153  | Comment                | single pulse | Date                 | 23 Jun 2021 19:47:10 | File Name             | F:\NMR CE t H \tawatari\TT0541-1H_proton-1-1.als |              |
| Frequency (MHz)        | 600.17  | Nucleus                | 1H           | Number of Transients | 8                    | Original Points Count | 16384                                            |              |
| Sweep Width (Hz)       | 9025.27 | Temperature (degree C) | 21.400       | Points Count         | 13120                | Pulse Sequence        | proton.jxp                                       |              |
|                        |         |                        |              |                      |                      |                       | Solvent                                          | CHLOROFORM-D |

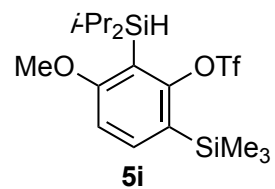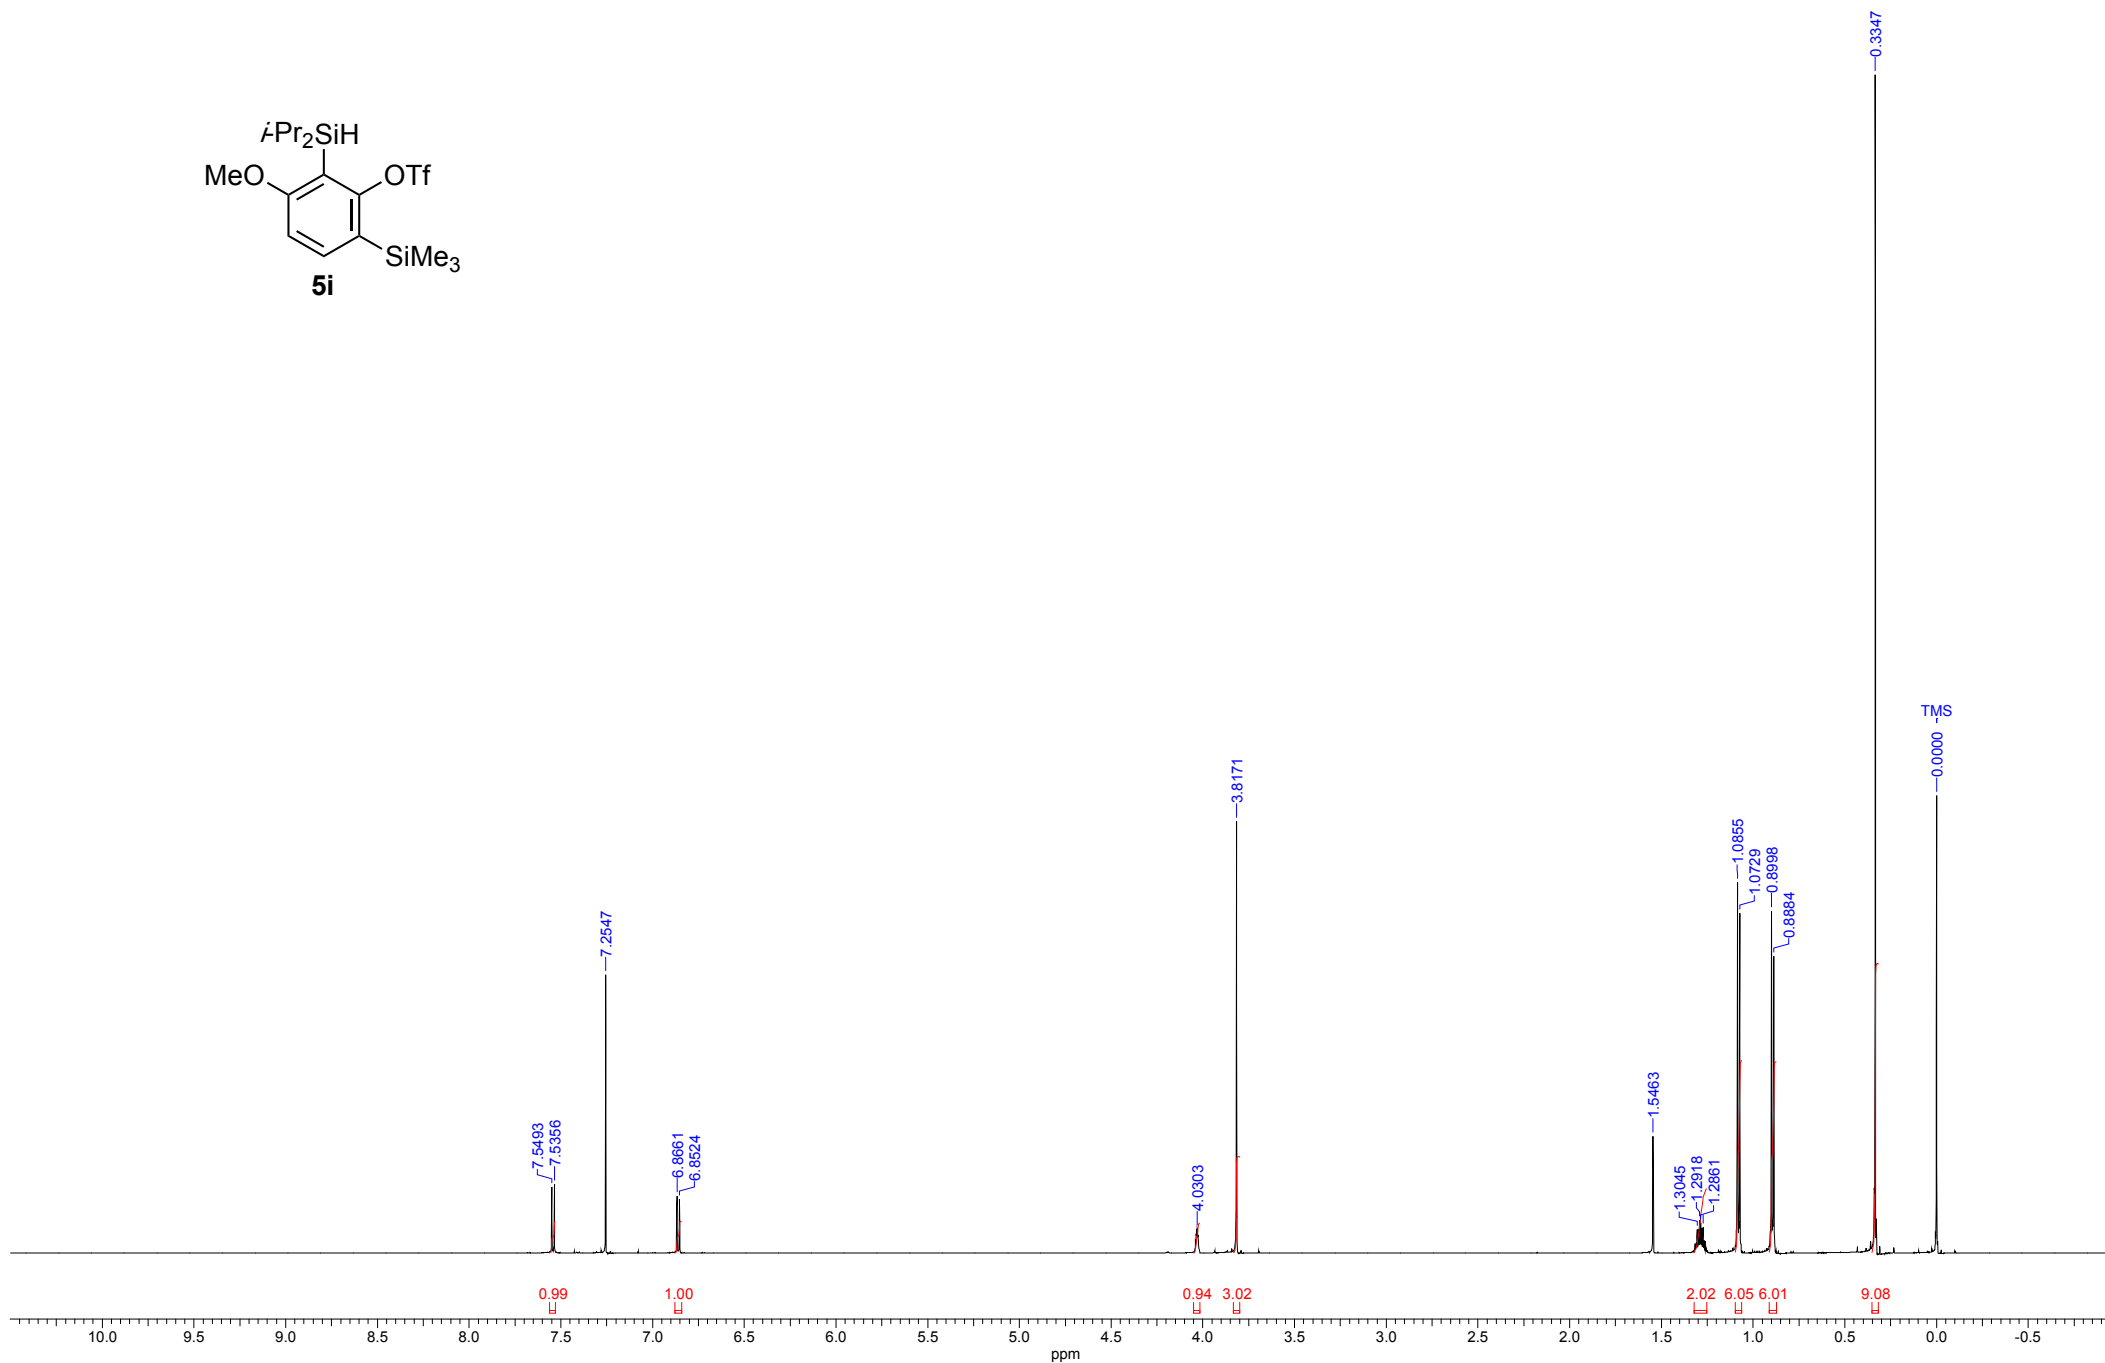



|                        |          |                        |                                  |                       |                      |              |                                                |
|------------------------|----------|------------------------|----------------------------------|-----------------------|----------------------|--------------|------------------------------------------------|
| Acquisition Time (sec) | 0.6921   | Comment                | single pulse decoupled gated NOE | Date                  | 04 Dec 2020 22:27:54 | File Name    | F:\NMR_CE_t_H\tawatari\TT0541-13C carbon-1.als |
| Frequency (MHz)        | 150.00   | Number of Transients   | 578                              | Original Points Count | 26214                | Points Count | 26214                                          |
| Sweep Width (Hz)       | 37876.77 | Temperature (degree C) | 21.500                           | Pulse Sequence        | carbon_cool.jxp      | Solvent      | CHLOROFORM-D                                   |

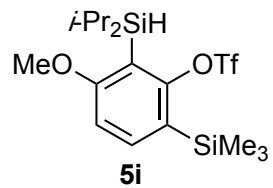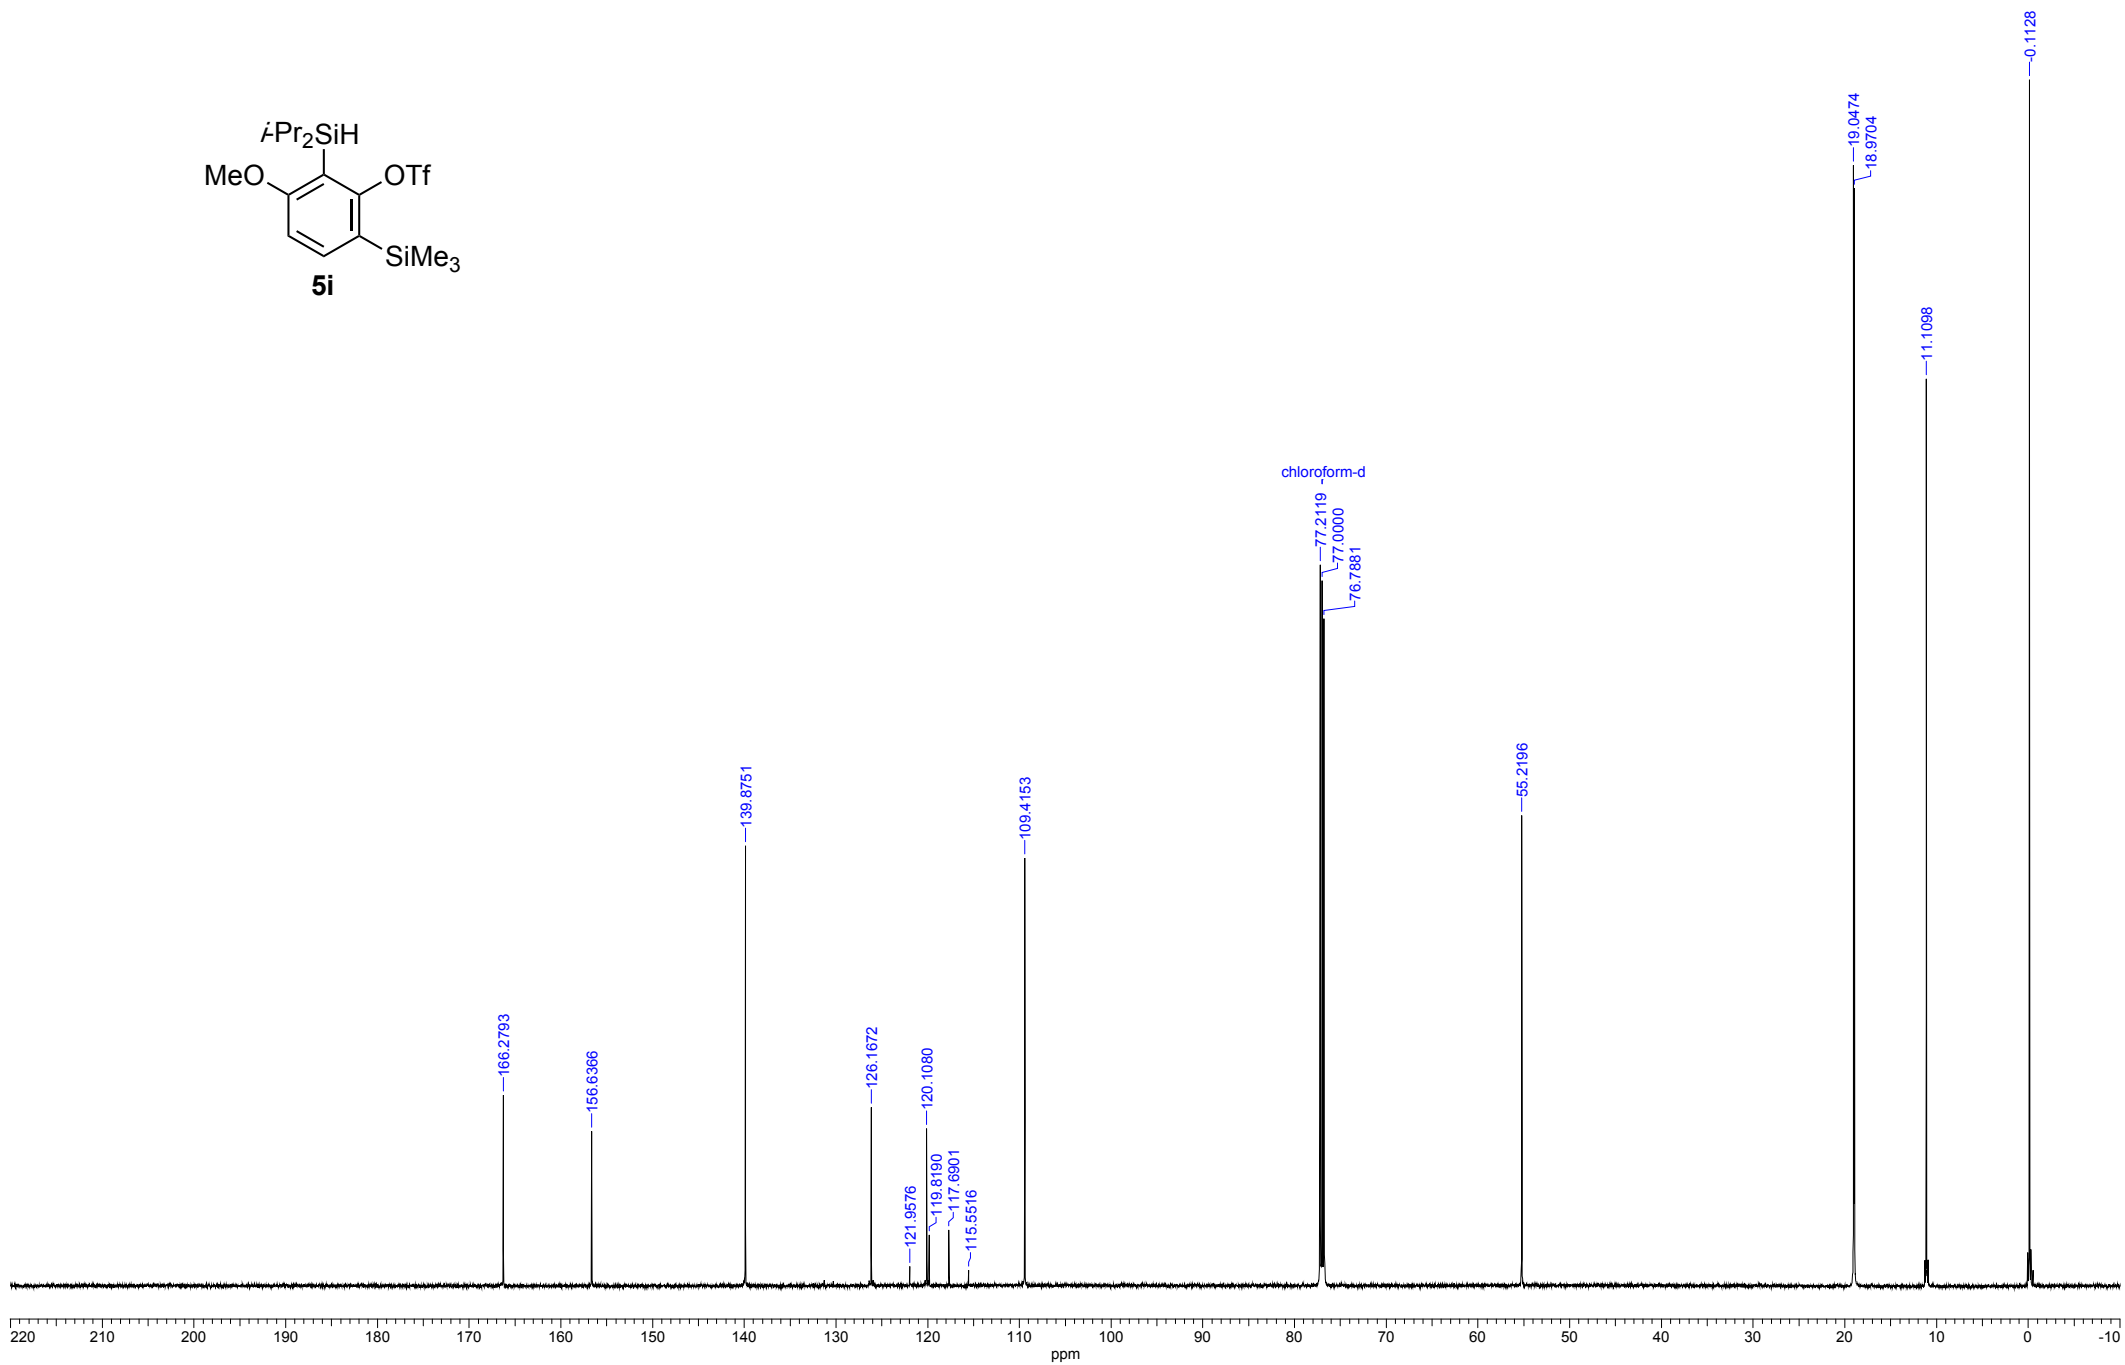

|                        |         |                        |              |                      |                      |                       |                                                       |
|------------------------|---------|------------------------|--------------|----------------------|----------------------|-----------------------|-------------------------------------------------------|
| Acquisition Time (sec) | 1.8153  | Comment                | single_pulse | Date                 | 23 Jun 2021 19:55:54 | File Name             | F:\NMR CE t H \tawatari\T0546-1Hretake_proton-1-1.als |
| Frequency (MHz)        | 600.17  | Nucleus                | 1H           | Number of Transients | 8                    | Original Points Count | 16384                                                 |
| Sweep Width (Hz)       | 9025.27 | Temperature (degree C) | 21.600       | Points Count         | 13120                | Pulse Sequence        | proton.jxp                                            |
|                        |         |                        |              |                      |                      | Solvent               | CHLOROFORM-D                                          |

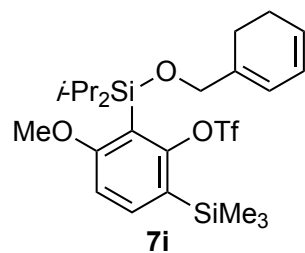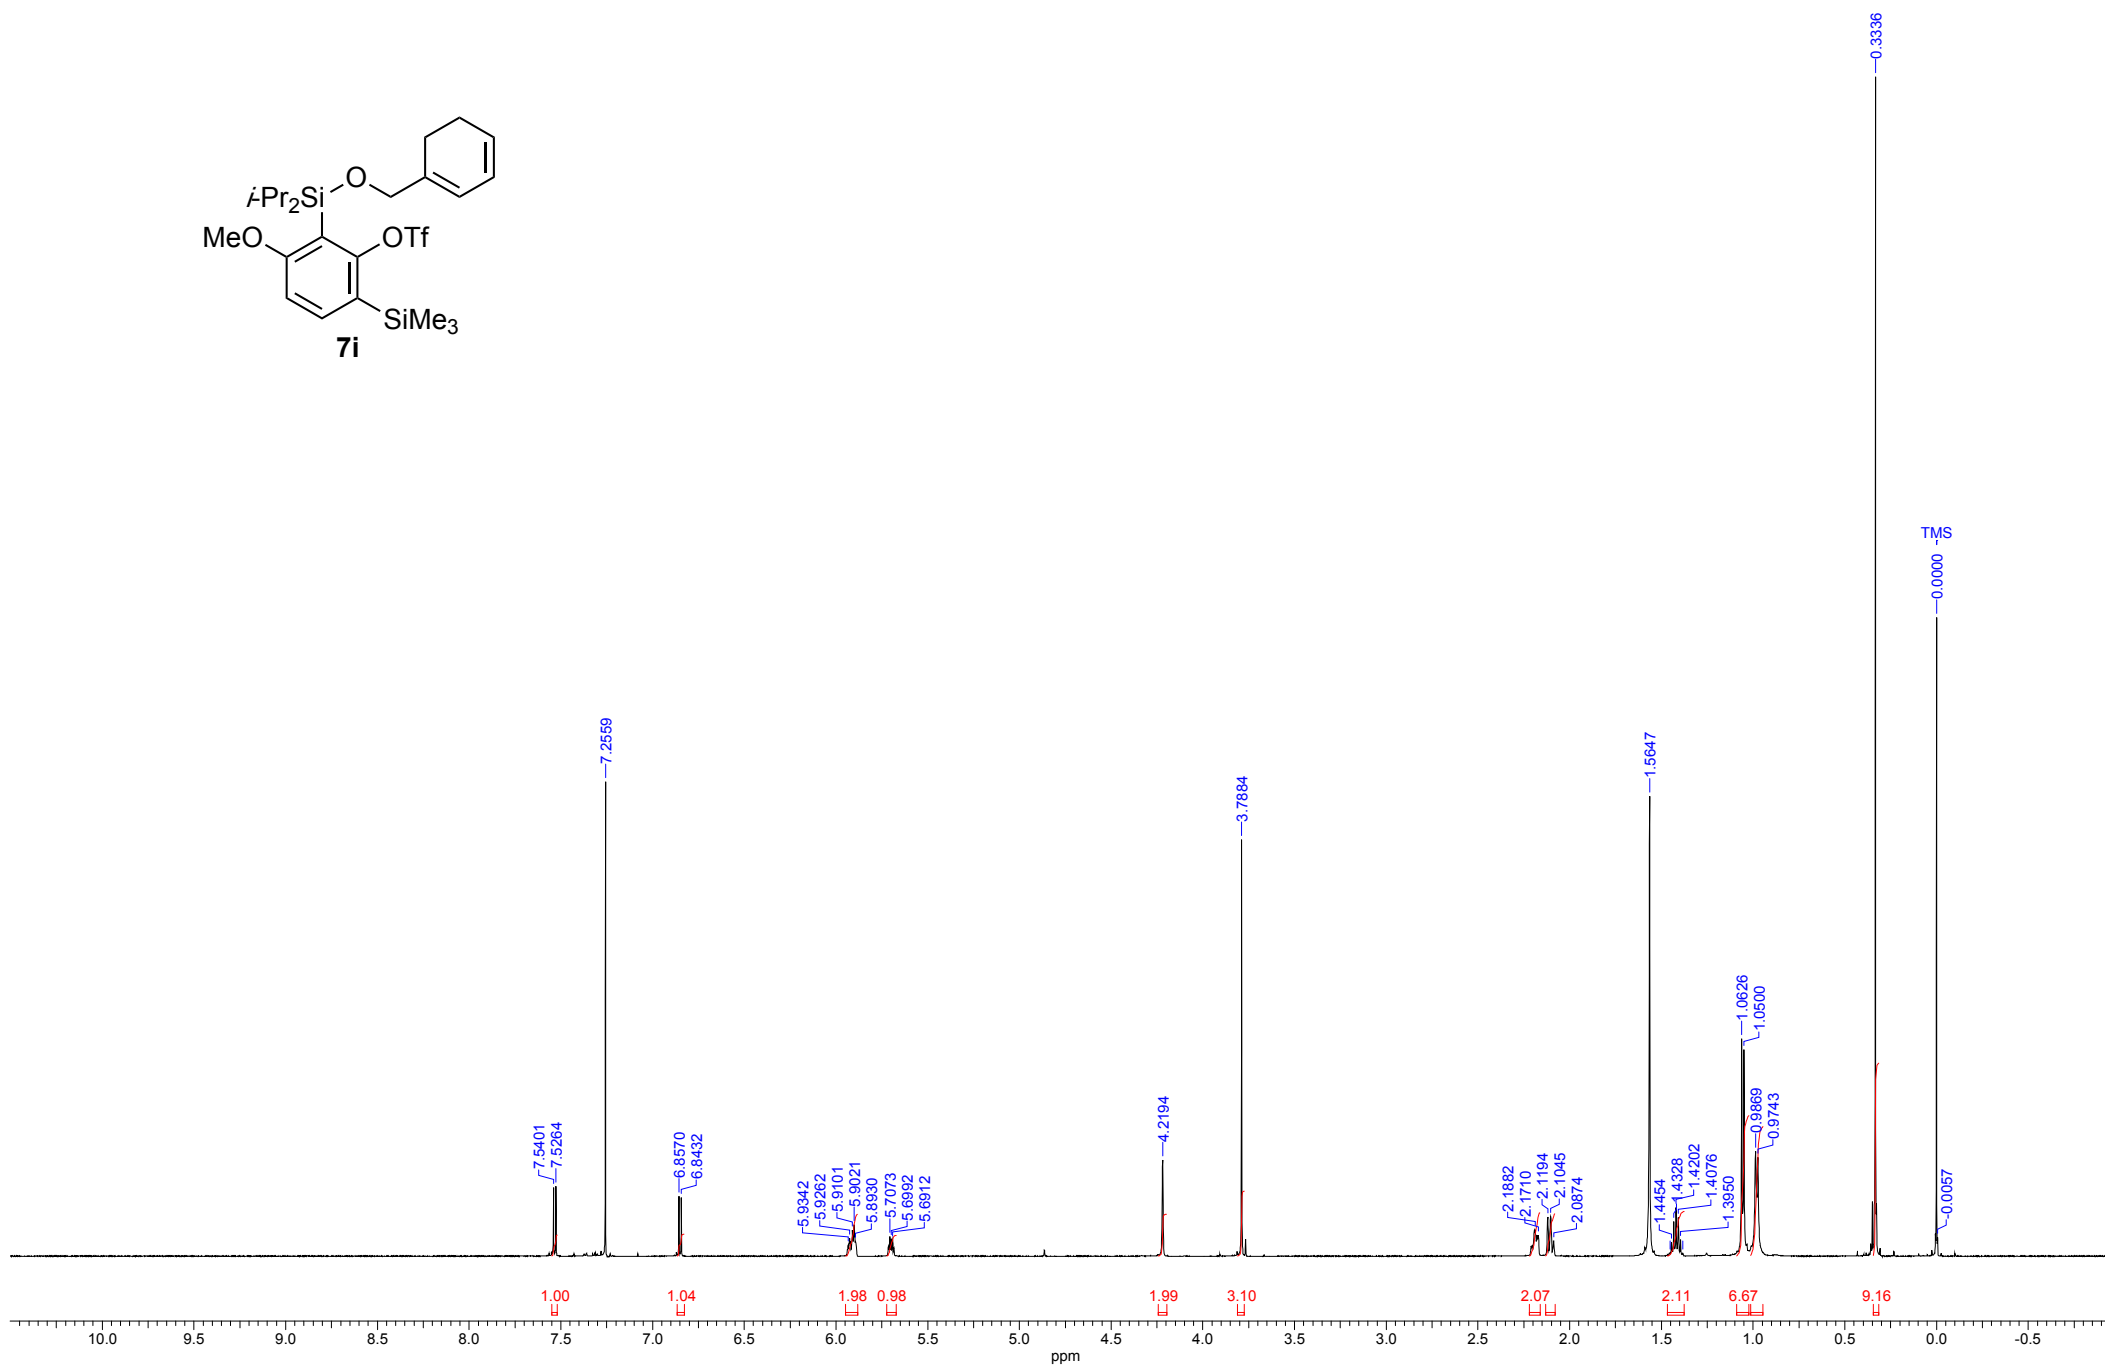

|                        |                                                        |                 |                                  |                        |                      |
|------------------------|--------------------------------------------------------|-----------------|----------------------------------|------------------------|----------------------|
| Acquisition Time (sec) | 0.6921                                                 | Comment         | single pulse decoupled gated NOE | Date                   | 05 Sep 2020 00:43:52 |
| File Name              | F:\NMR CE t H \tawatar\TT0546-13C carbon-1-1retake.als | Frequency (MHz) | 150.00                           | Number of Transients   | 354                  |
| Pulse Sequence         | carbon_cool.jxp                                        | Solvent         | CHLOROFORM-D                     | Sweep Width (Hz)       | 37876.77             |
|                        |                                                        |                 |                                  | Temperature (degree C) | 21.700               |
|                        |                                                        |                 |                                  | Original Points Count  | 26214                |
|                        |                                                        |                 |                                  | Points Count           | 26214                |

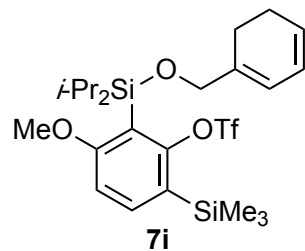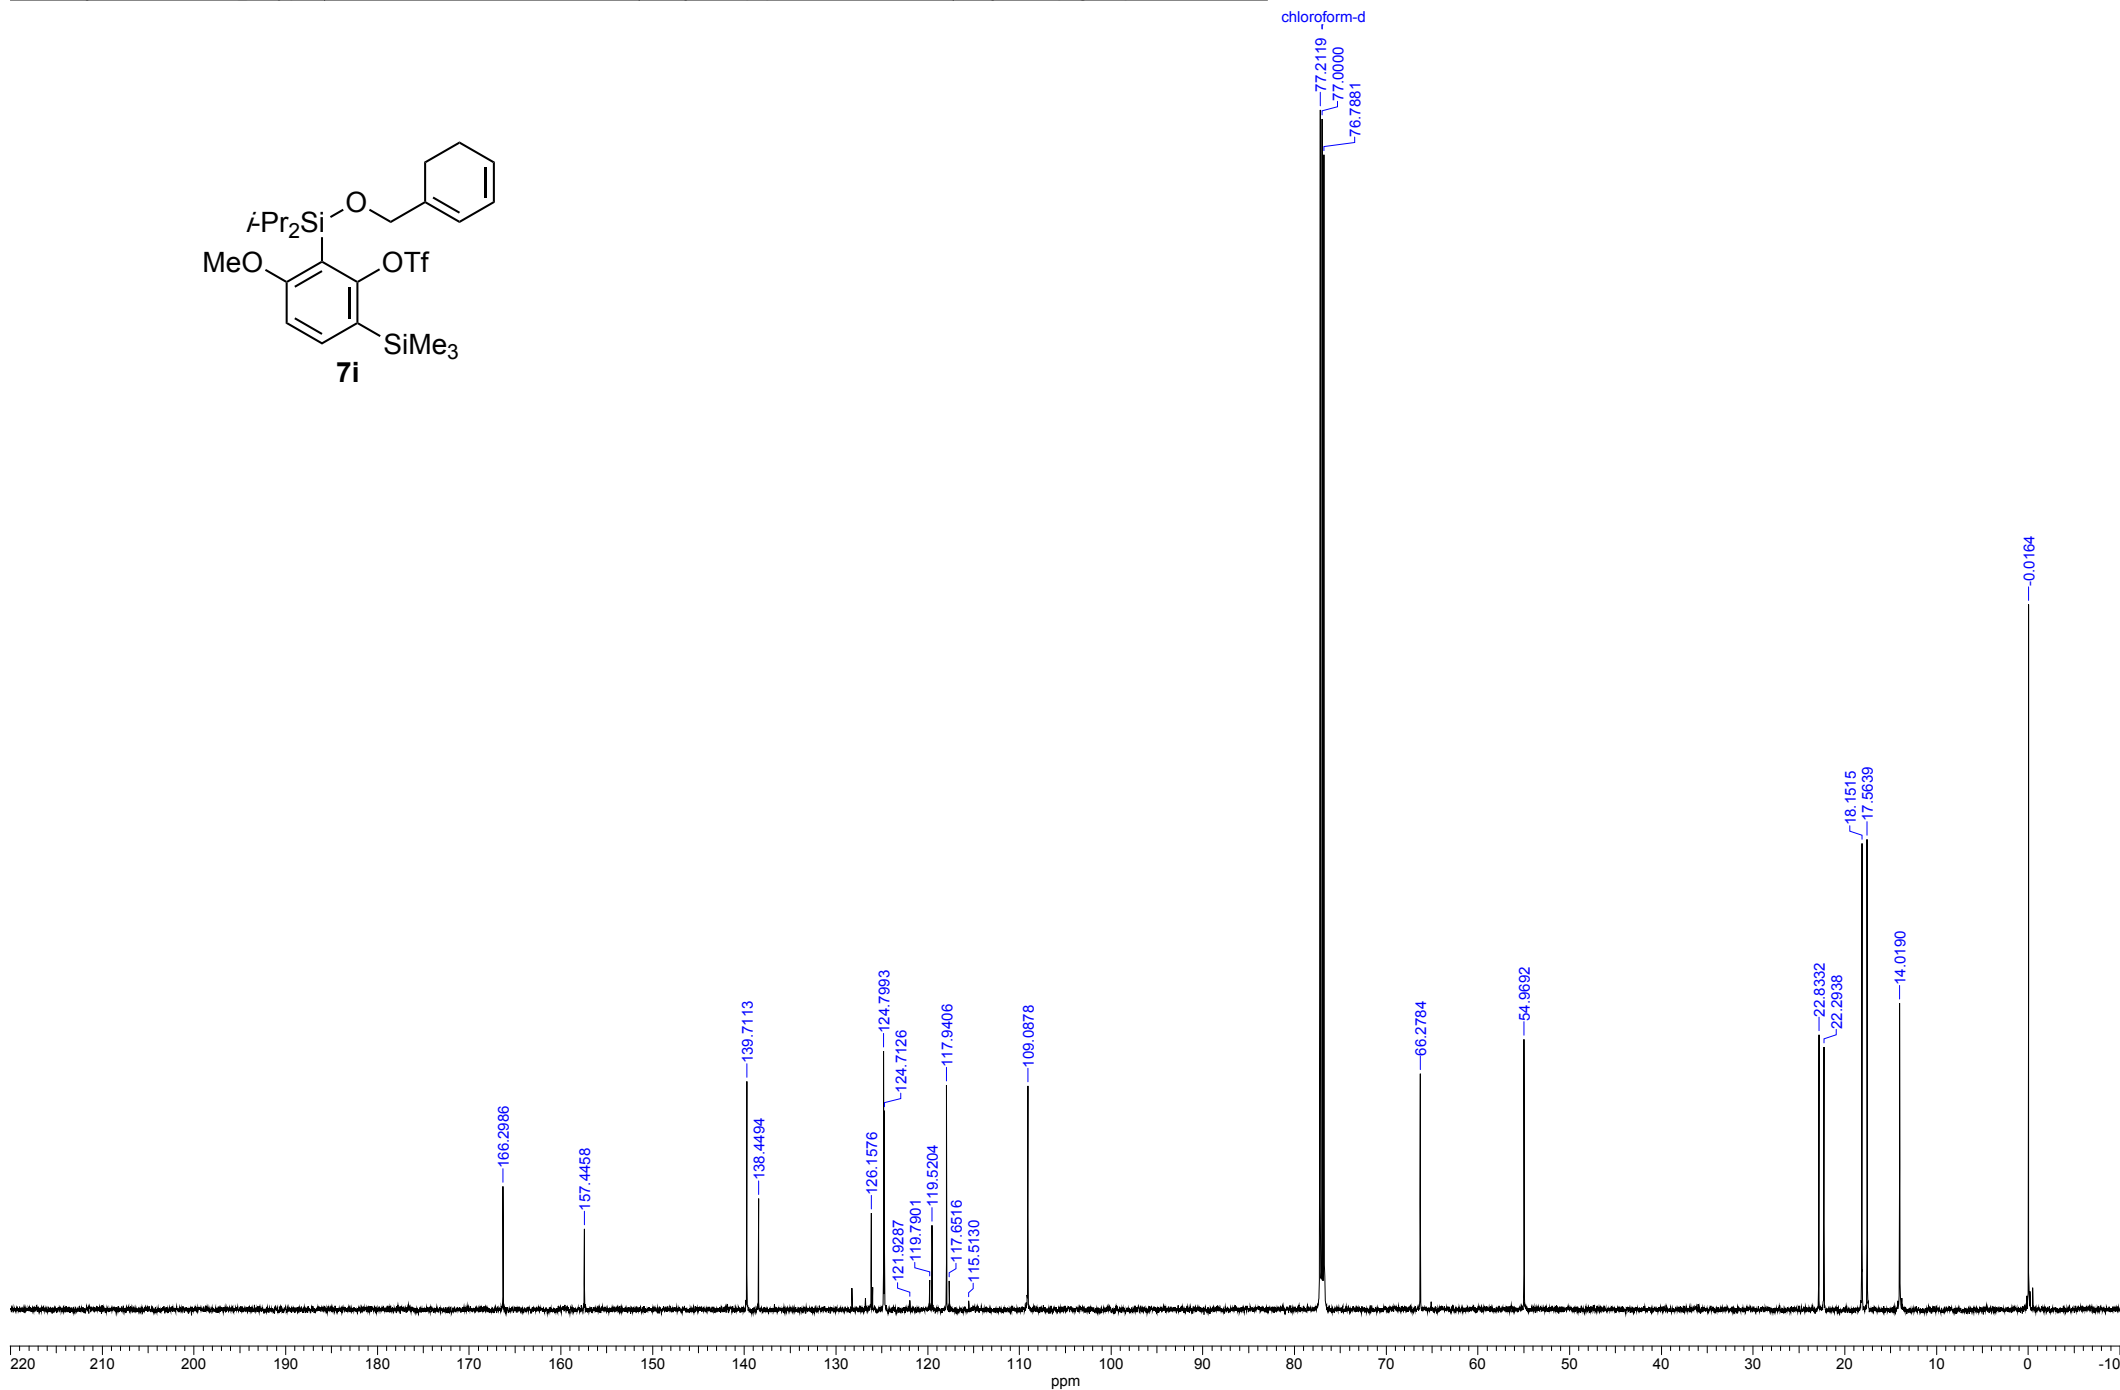

|                        |         |                        |              |                      |                      |                       |                                                  |
|------------------------|---------|------------------------|--------------|----------------------|----------------------|-----------------------|--------------------------------------------------|
| Acquisition Time (sec) | 1.8153  | Comment                | single pulse | Date                 | 23 Jun 2021 20:16:18 | File Name             | F:\NMR CE t H \tawatari\TT0564-1H_proton-1-1.als |
| Frequency (MHz)        | 600.17  | Nucleus                | 1H           | Number of Transients | 8                    | Original Points Count | 16384                                            |
| Sweep Width (Hz)       | 9025.27 | Temperature (degree C) | 21.600       | Points Count         | 13120                | Pulse Sequence        | proton.jxp                                       |
|                        |         |                        |              |                      |                      | Solvent               | CHLOROFORM-D                                     |

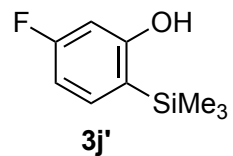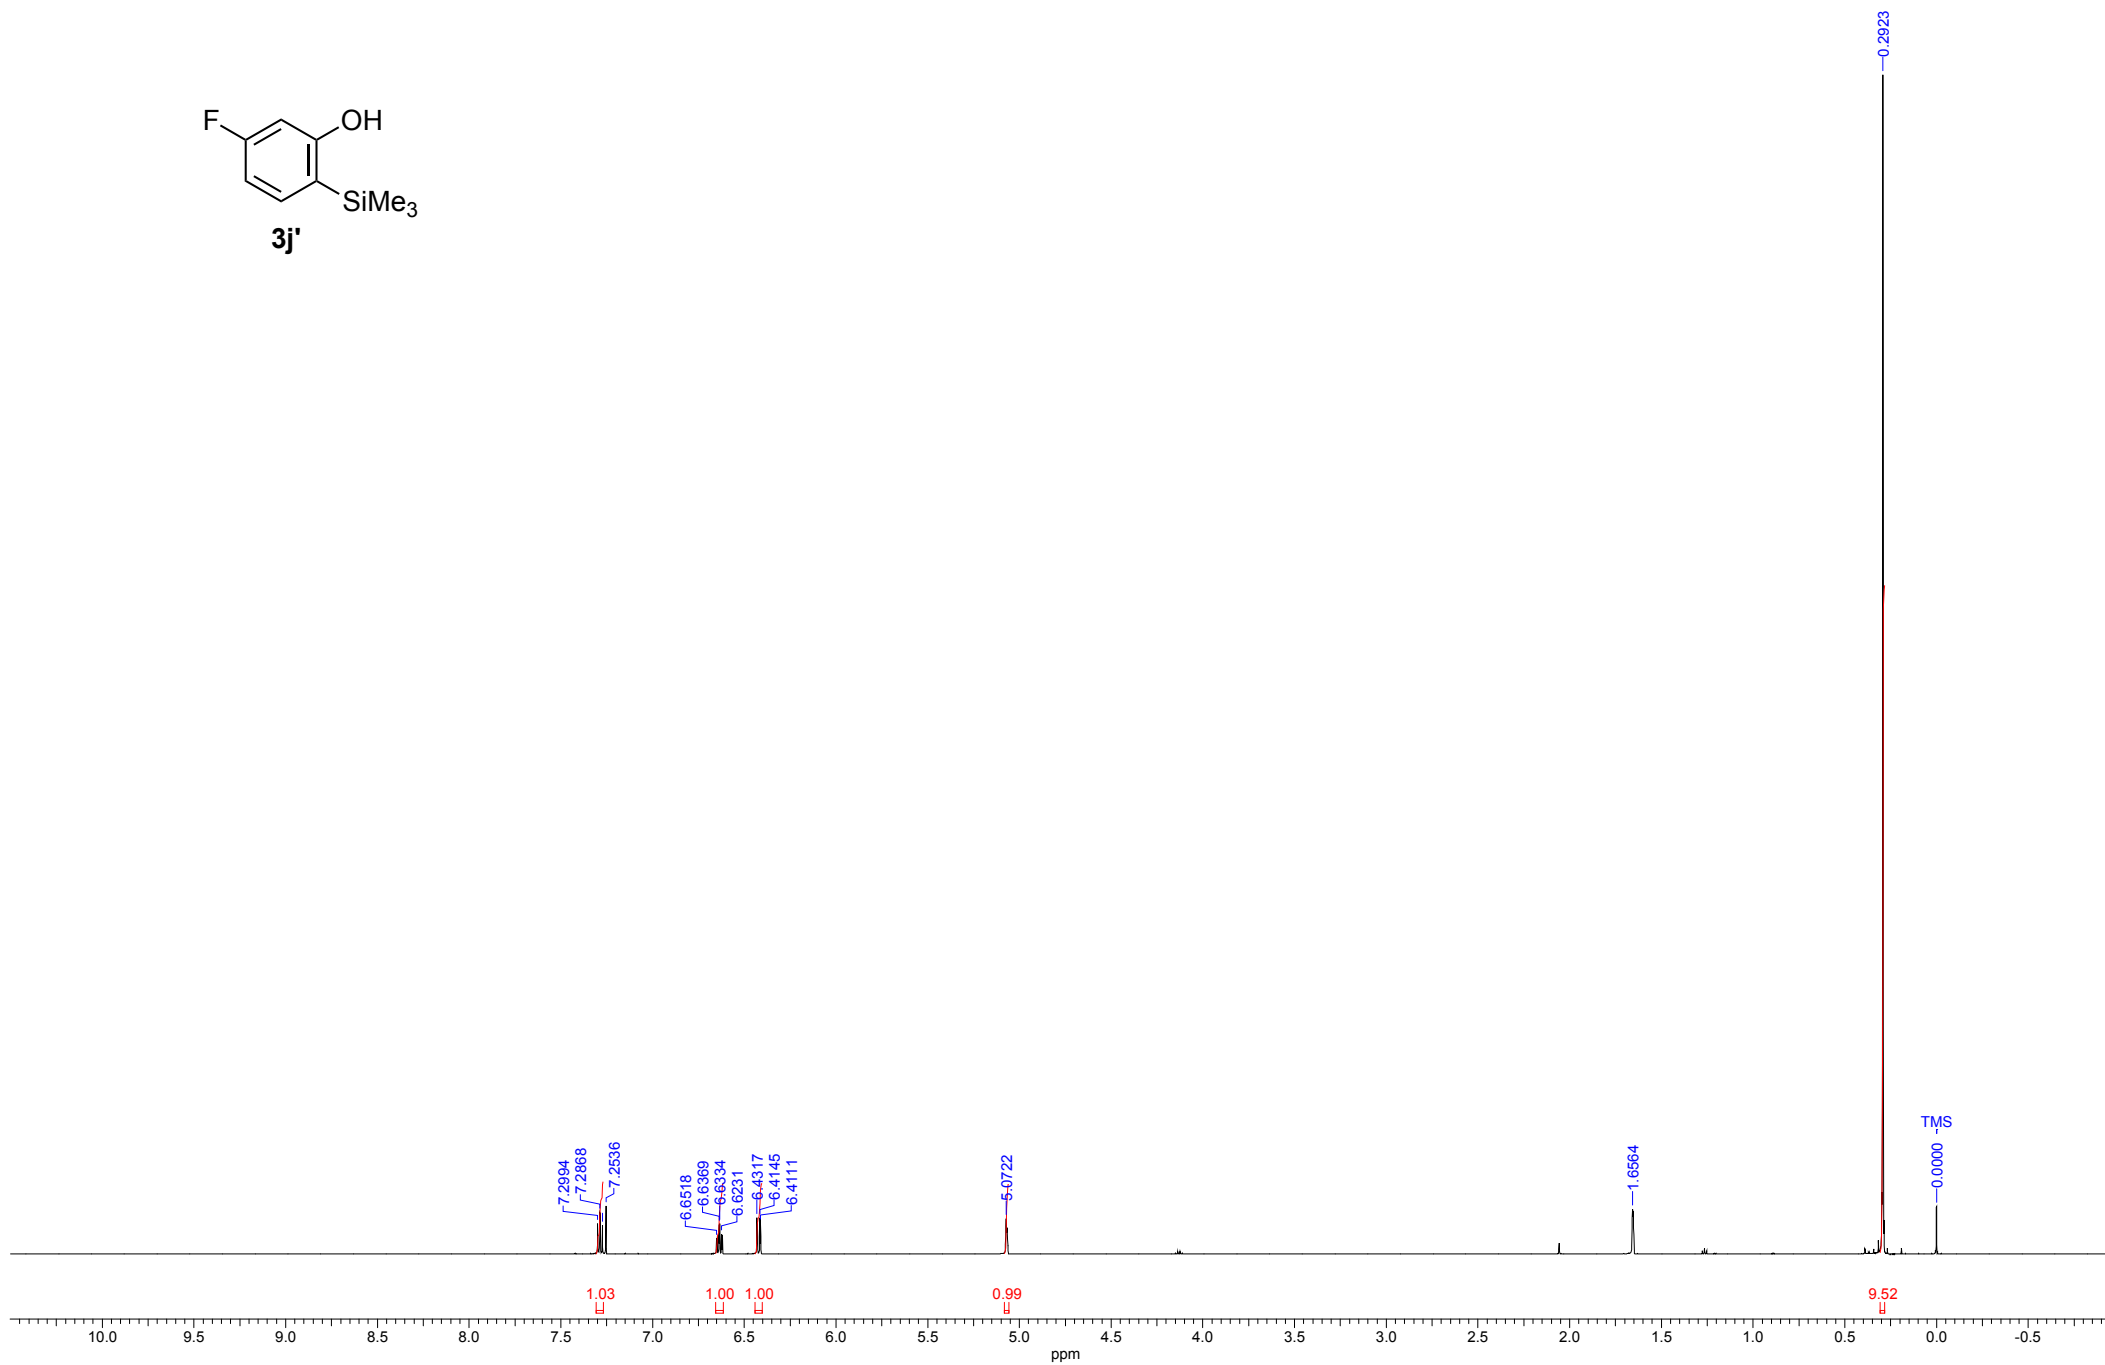

|                        |          |                        |                                  |                       |                      |              |                                                |
|------------------------|----------|------------------------|----------------------------------|-----------------------|----------------------|--------------|------------------------------------------------|
| Acquisition Time (sec) | 0.6921   | Comment                | single pulse decoupled gated NOE | Date                  | 04 Dec 2020 22:35:12 | File Name    | F:\NMR_CE_t_H\tawatari\TT0564-13C carbon-1.als |
| Frequency (MHz)        | 150.00   | Number of Transients   | 101                              | Original Points Count | 26214                | Points Count | 26214                                          |
| Sweep Width (Hz)       | 37876.77 | Temperature (degree C) | 21.500                           | Pulse Sequence        | carbon_cool.jxp      | Solvent      | CHLOROFORM-D                                   |

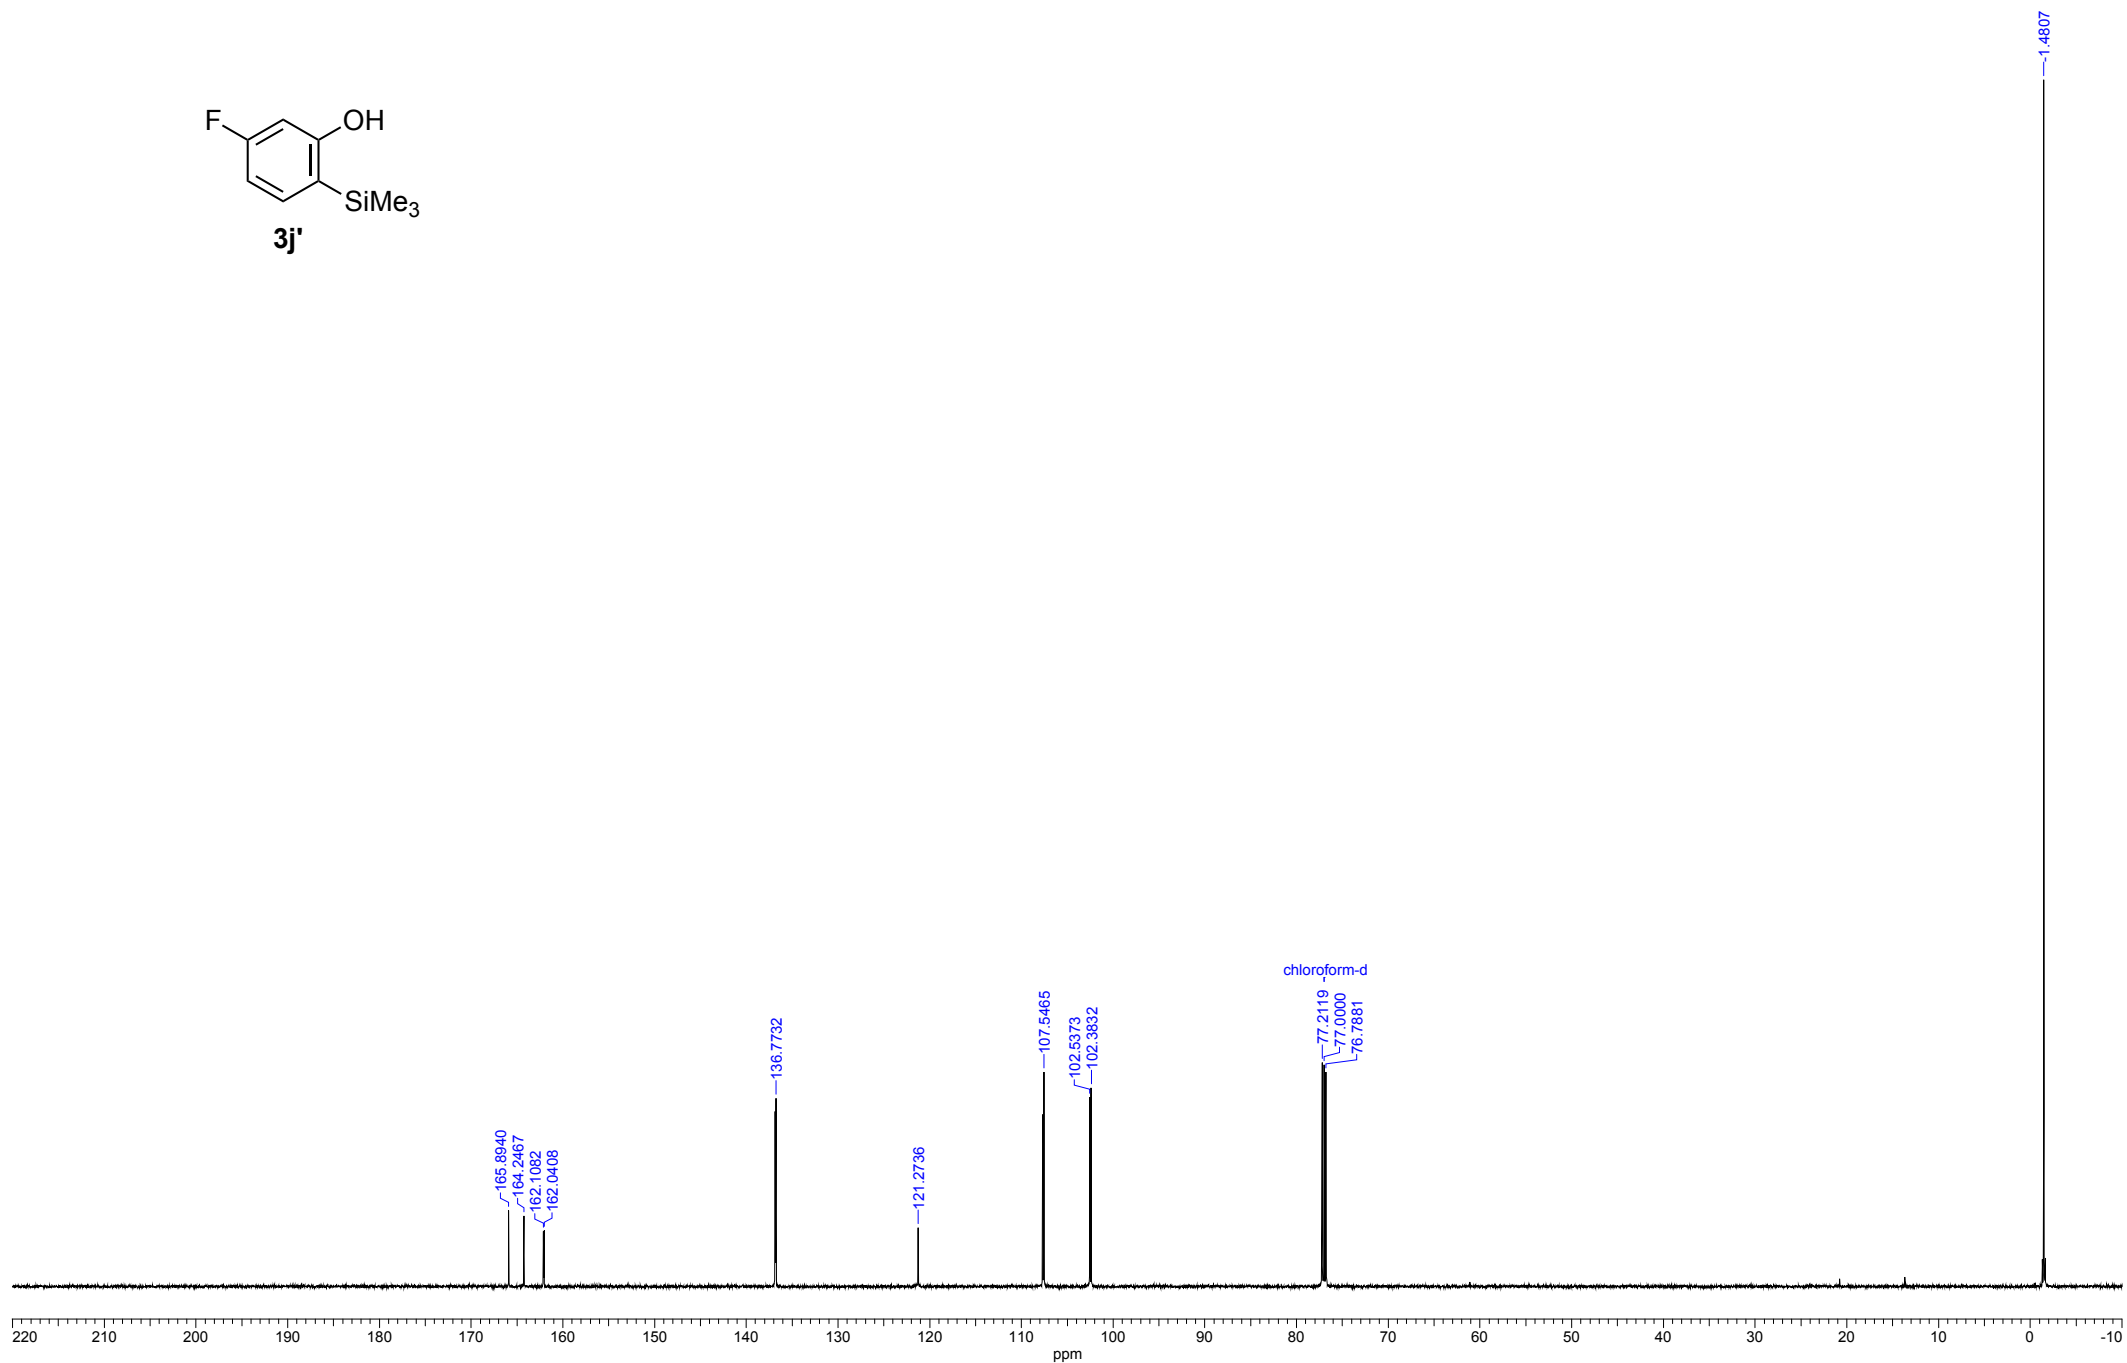

|                        |         |                        |              |                      |                      |                       |                                                  |              |
|------------------------|---------|------------------------|--------------|----------------------|----------------------|-----------------------|--------------------------------------------------|--------------|
| Acquisition Time (sec) | 1.8153  | Comment                | single pulse | Date                 | 04 Dec 2020 22:42:50 | File Name             | F:\NMR CE t H \tawatari\TT0566-1H_proton-1-1.als |              |
| Frequency (MHz)        | 600.17  | Nucleus                | 1H           | Number of Transients | 8                    | Original Points Count | 16384                                            |              |
| Sweep Width (Hz)       | 9025.27 | Temperature (degree C) | 21.400       | Points Count         | 13120                | Pulse Sequence        | proton.jxp                                       |              |
|                        |         |                        |              |                      |                      |                       | Solvent                                          | CHLOROFORM-D |

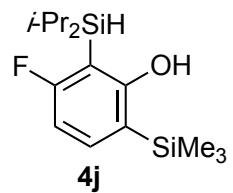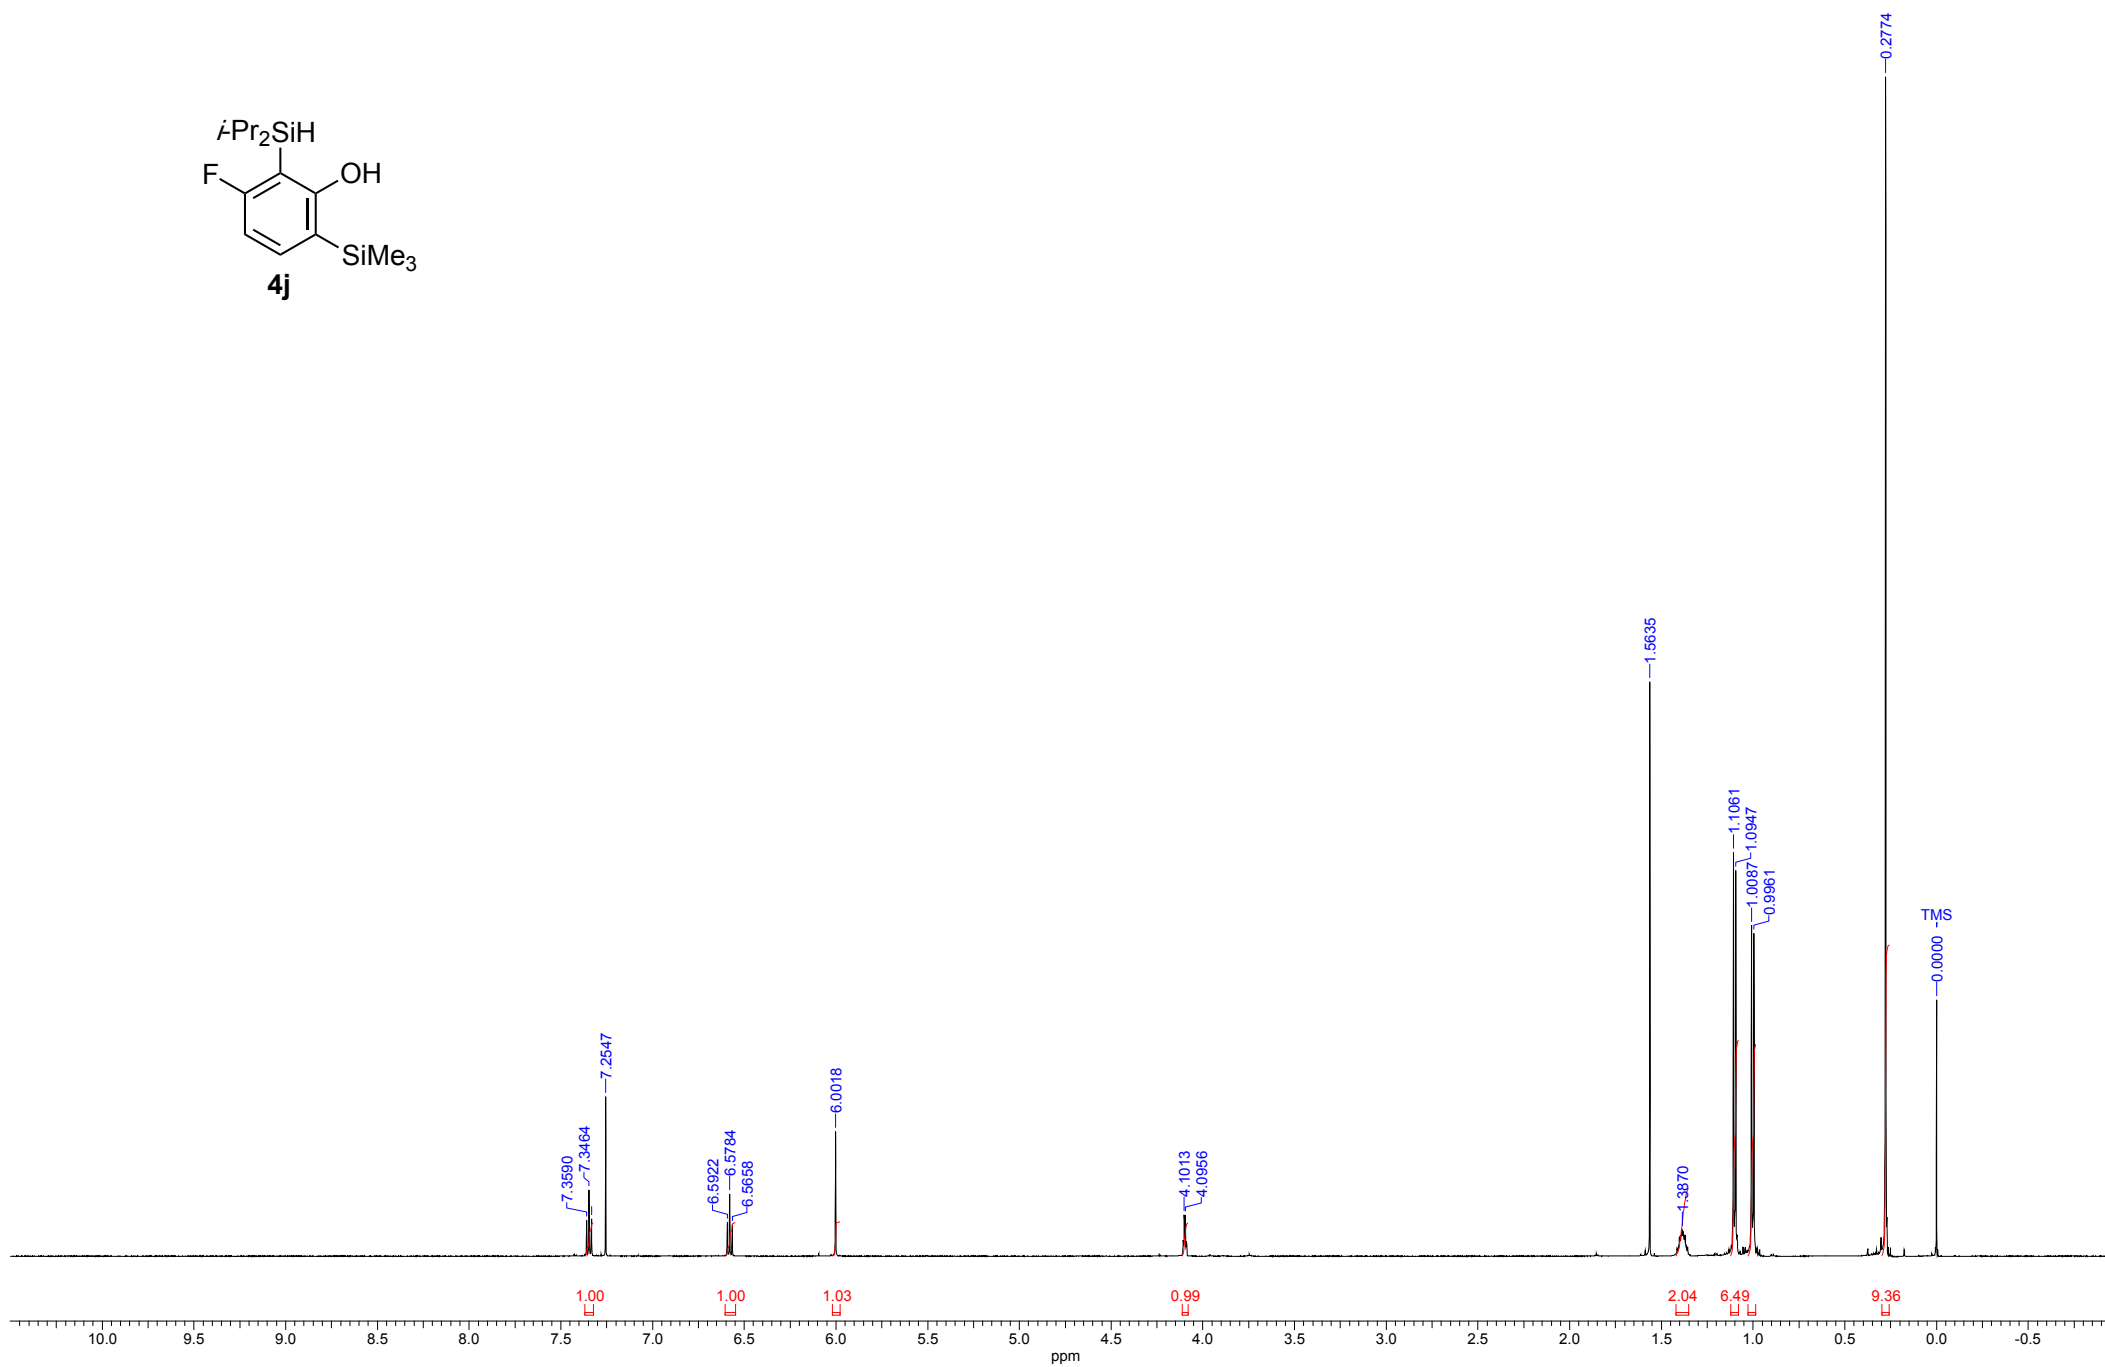

|                        |          |                        |                                  |                       |                      |              |                                                |
|------------------------|----------|------------------------|----------------------------------|-----------------------|----------------------|--------------|------------------------------------------------|
| Acquisition Time (sec) | 0.6921   | Comment                | single pulse decoupled gated NOE | Date                  | 04 Dec 2020 22:36:16 | File Name    | F:\NMR_CE_t_H\tawatari\TT0566-13C carbon-1.als |
| Frequency (MHz)        | 150.00   | Number of Transients   | 124                              | Original Points Count | 26214                | Points Count | 26214                                          |
| Sweep Width (Hz)       | 37876.77 | Temperature (degree C) | 21.400                           | Pulse Sequence        | carbon_cool.jxp      | Solvent      | CHLOROFORM-D                                   |

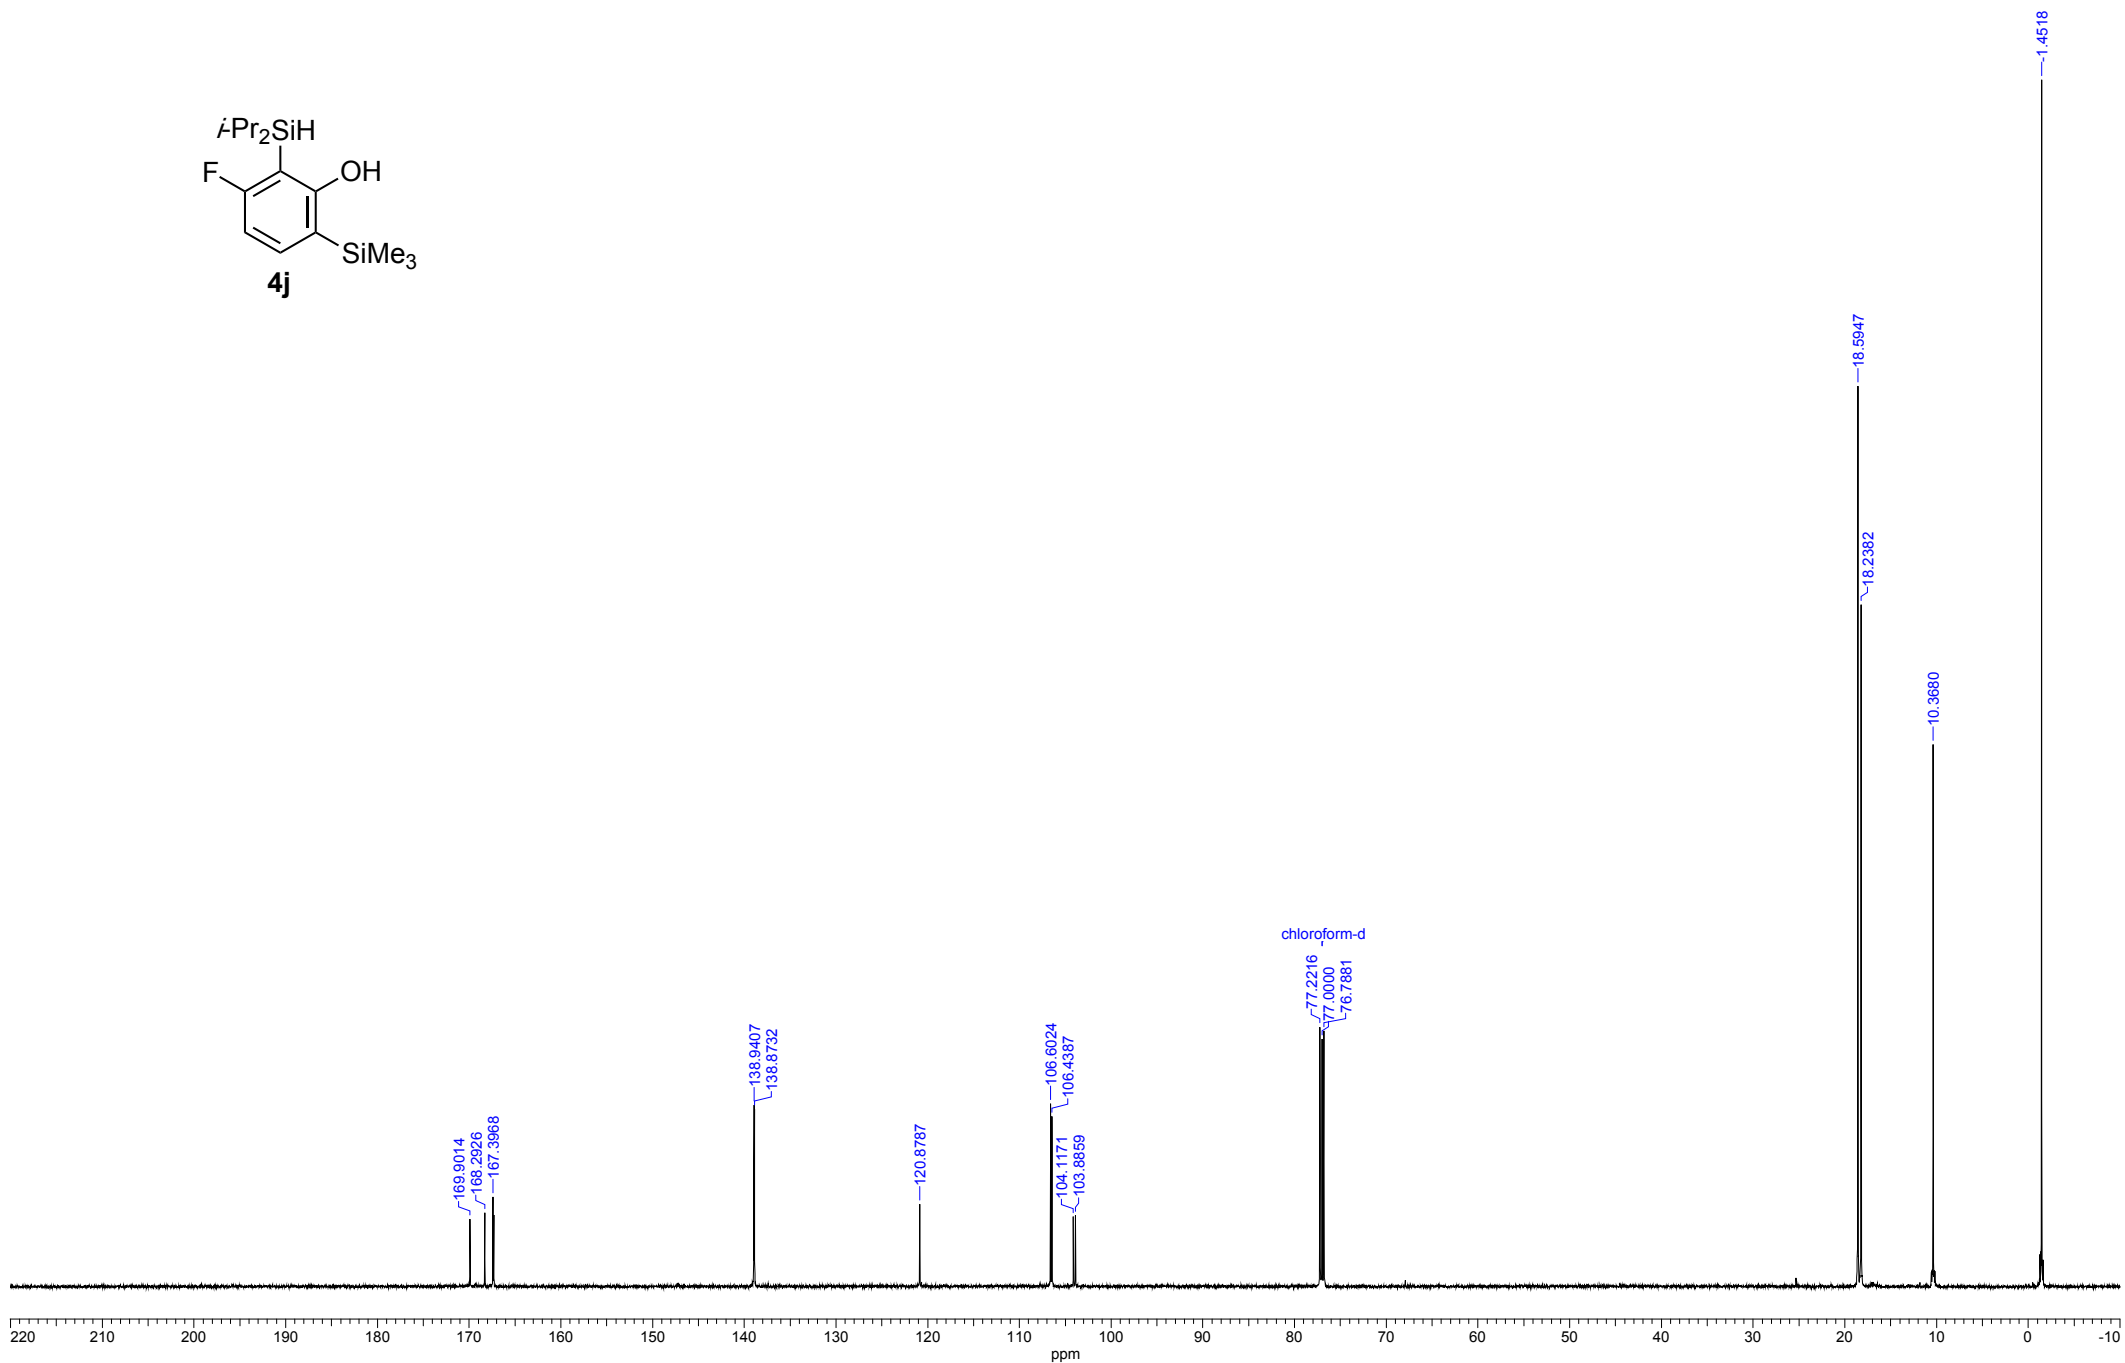

|                        |         |                        |              |                      |                      |                       |                                                  |
|------------------------|---------|------------------------|--------------|----------------------|----------------------|-----------------------|--------------------------------------------------|
| Acquisition Time (sec) | 1.8153  | Comment                | single pulse | Date                 | 23 Jun 2021 20:43:20 | File Name             | F:\NMR CE t H \tawarani\TT0570-1H_proton-1-1.als |
| Frequency (MHz)        | 600.17  | Nucleus                | 1H           | Number of Transients | 8                    | Original Points Count | 16384                                            |
| Sweep Width (Hz)       | 9025.27 | Temperature (degree C) | 21.500       | Points Count         | 13120                | Pulse Sequence        | proton.jxp                                       |
|                        |         |                        |              |                      |                      | Solvent               | CHLOROFORM-D                                     |

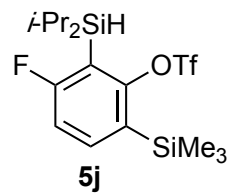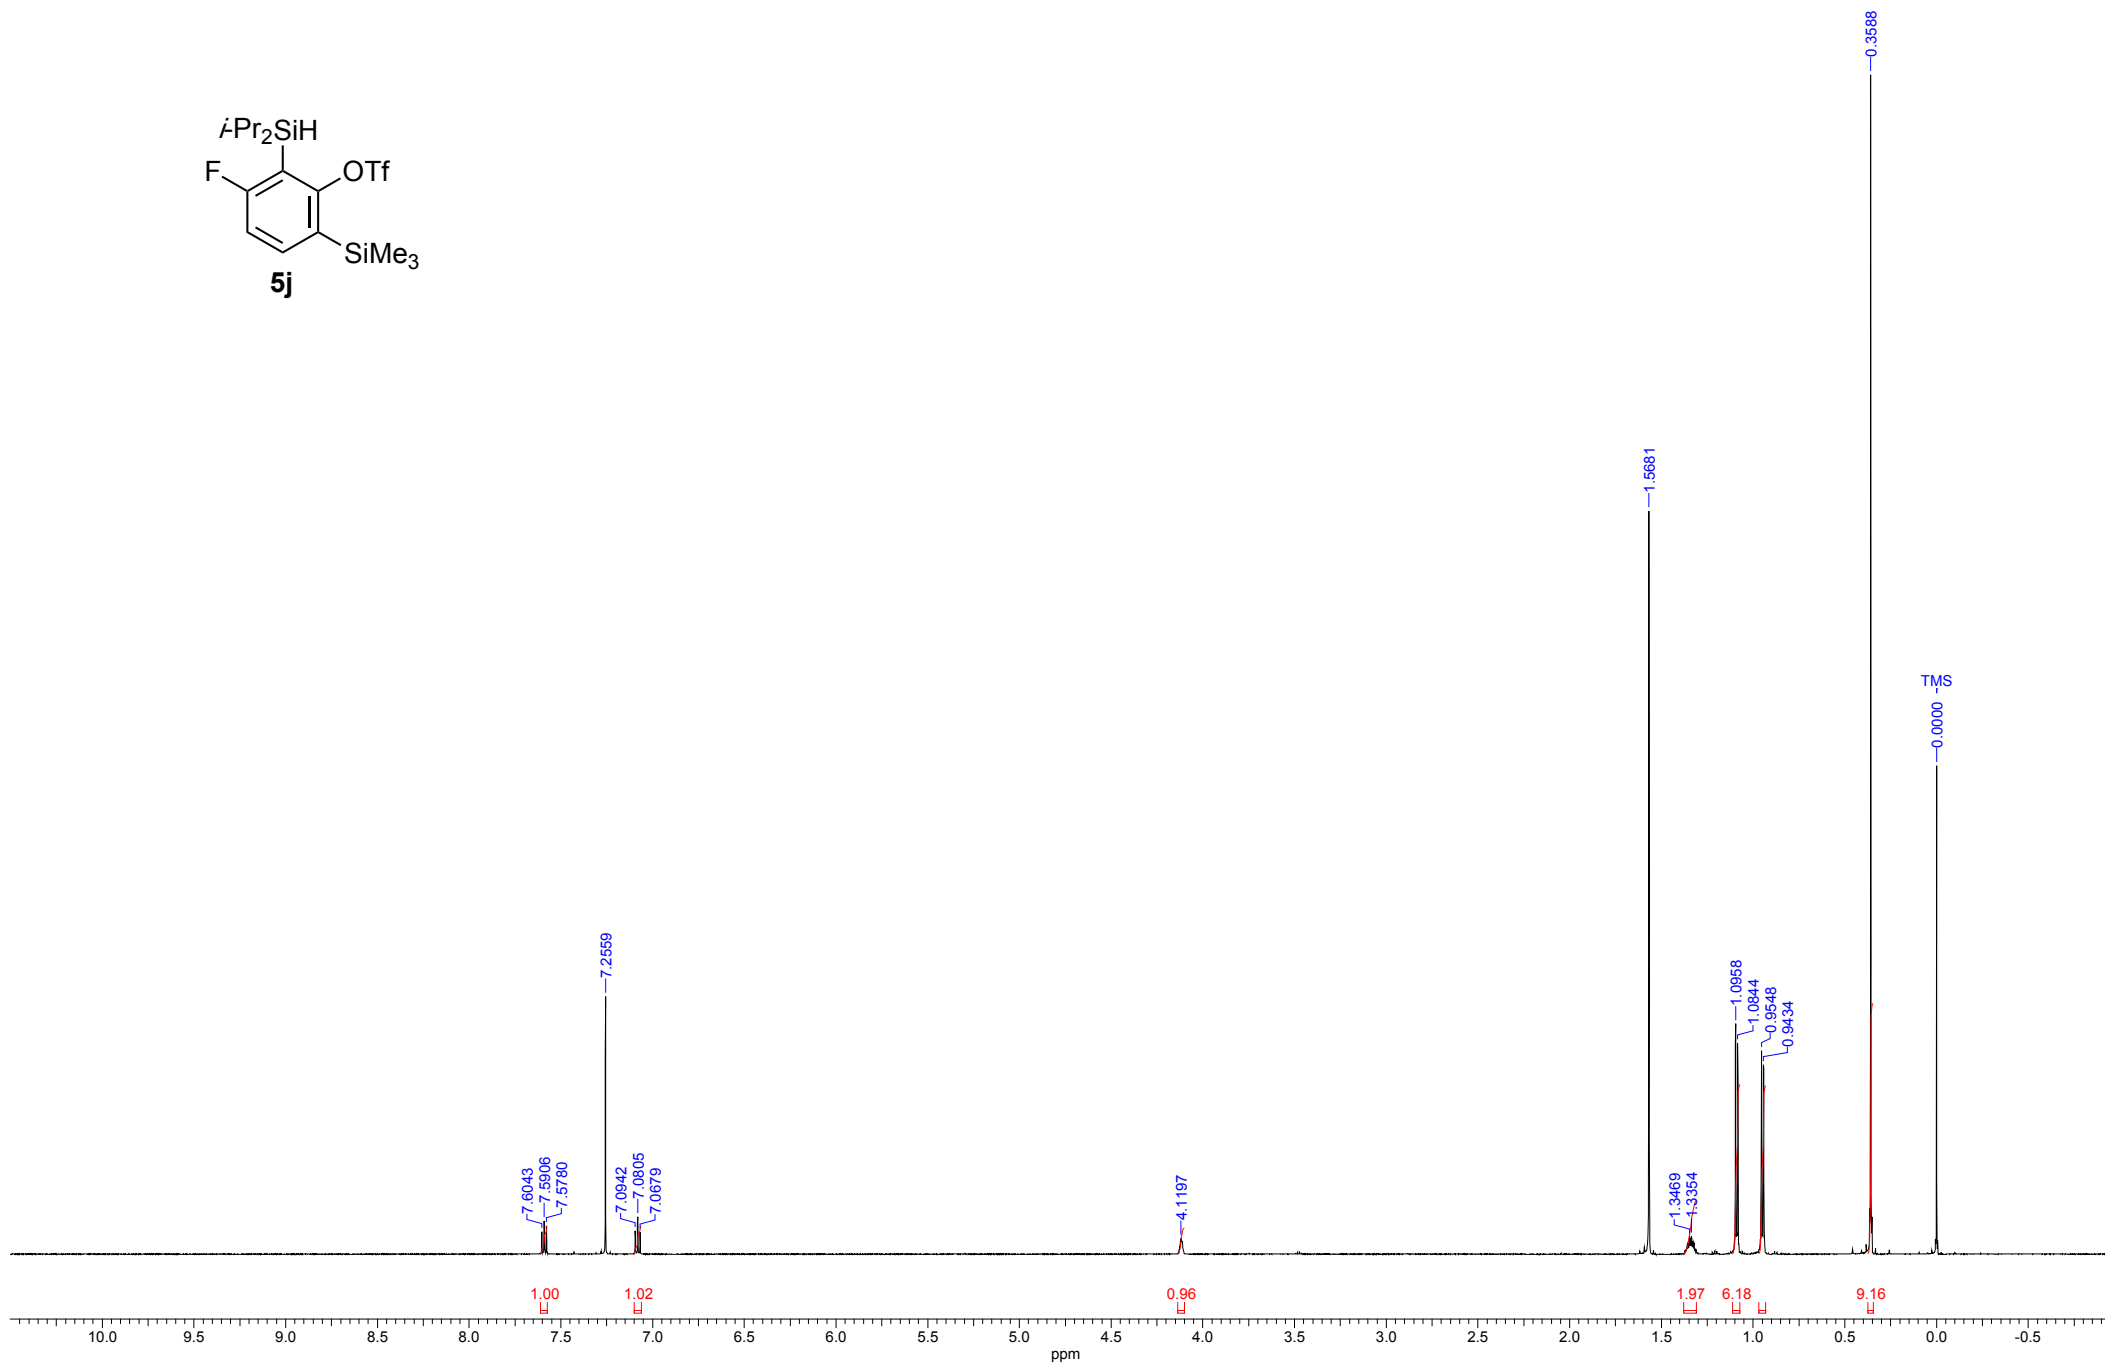



|                        |          |                        |                                  |                       |                      |              |                                                |
|------------------------|----------|------------------------|----------------------------------|-----------------------|----------------------|--------------|------------------------------------------------|
| Acquisition Time (sec) | 0.6921   | Comment                | single pulse decoupled gated NOE | Date                  | 04 Dec 2020 22:37:18 | File Name    | F:\NMR_CE_t_H\tawatari\TT0570-13C carbon-1.als |
| Frequency (MHz)        | 150.00   | Number of Transients   | 256                              | Original Points Count | 26214                | Points Count | 26214                                          |
| Sweep Width (Hz)       | 37876.77 | Temperature (degree C) | 21.500                           | Pulse Sequence        | carbon_cool.jxp      | Solvent      | CHLOROFORM-D                                   |

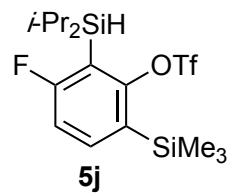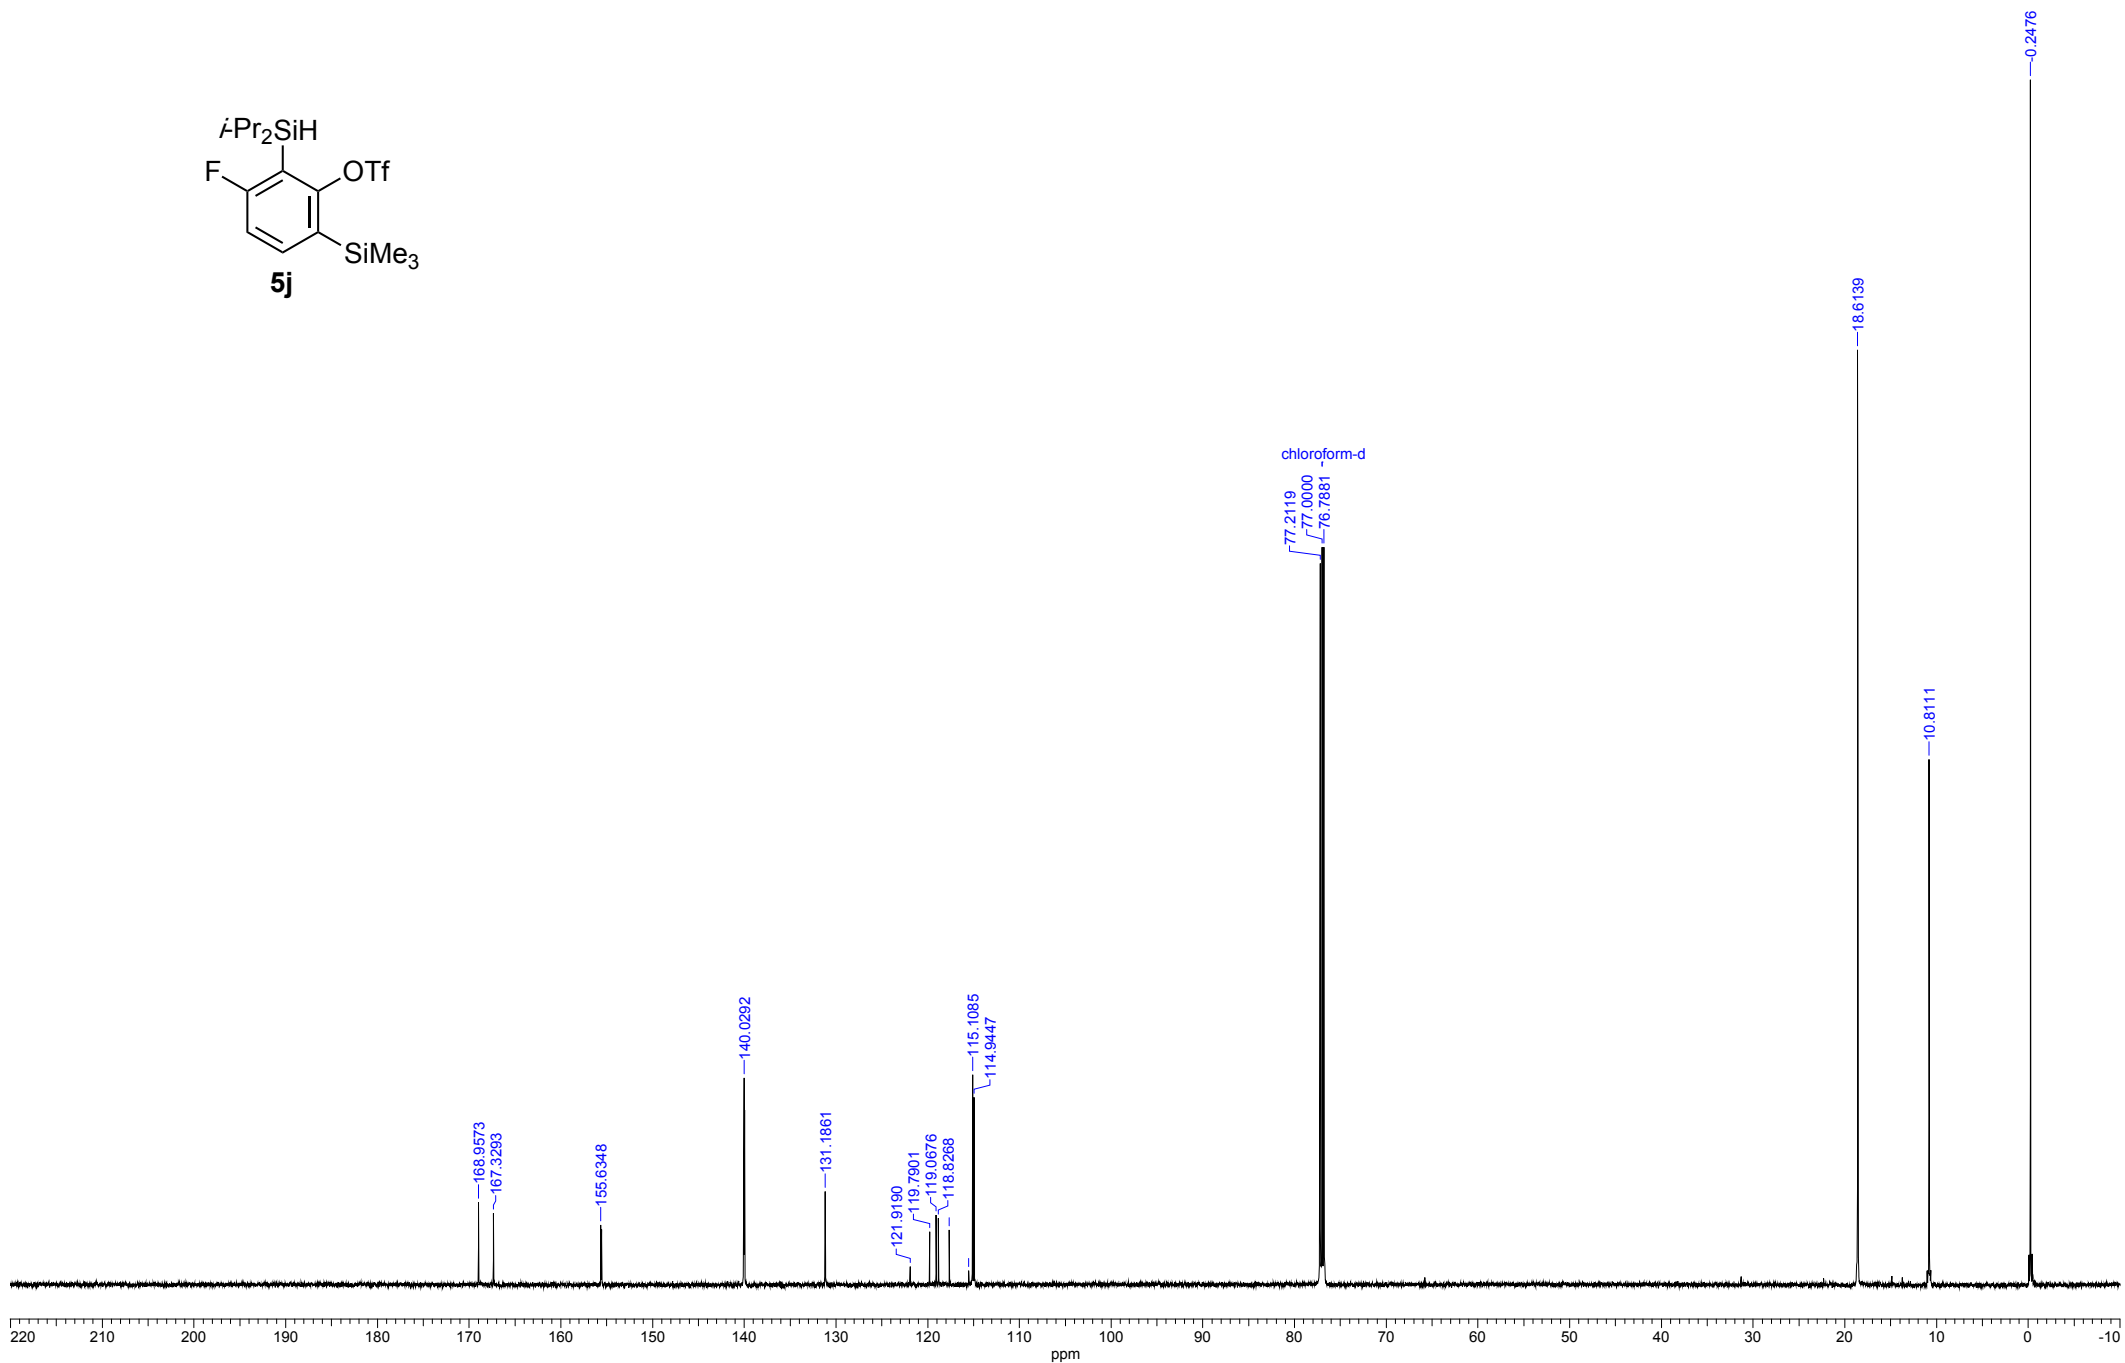

|                        |         |                        |              |                      |                      |                       |                                                  |              |
|------------------------|---------|------------------------|--------------|----------------------|----------------------|-----------------------|--------------------------------------------------|--------------|
| Acquisition Time (sec) | 1.8153  | Comment                | single pulse | Date                 | 23 Jun 2021 20:59:30 | File Name             | F:\NMR CE t H \tawatari\TT0661-1H_proton-1-1.als |              |
| Frequency (MHz)        | 600.17  | Nucleus                | 1H           | Number of Transients | 8                    | Original Points Count | 16384                                            |              |
| Sweep Width (Hz)       | 9025.27 | Temperature (degree C) | 20.900       | Points Count         | 13120                | Pulse Sequence        | proton.jxp                                       |              |
|                        |         |                        |              |                      |                      |                       | Solvent                                          | CHLOROFORM-D |

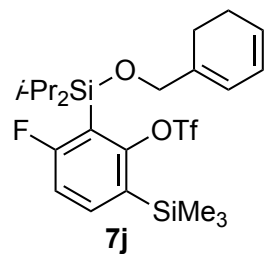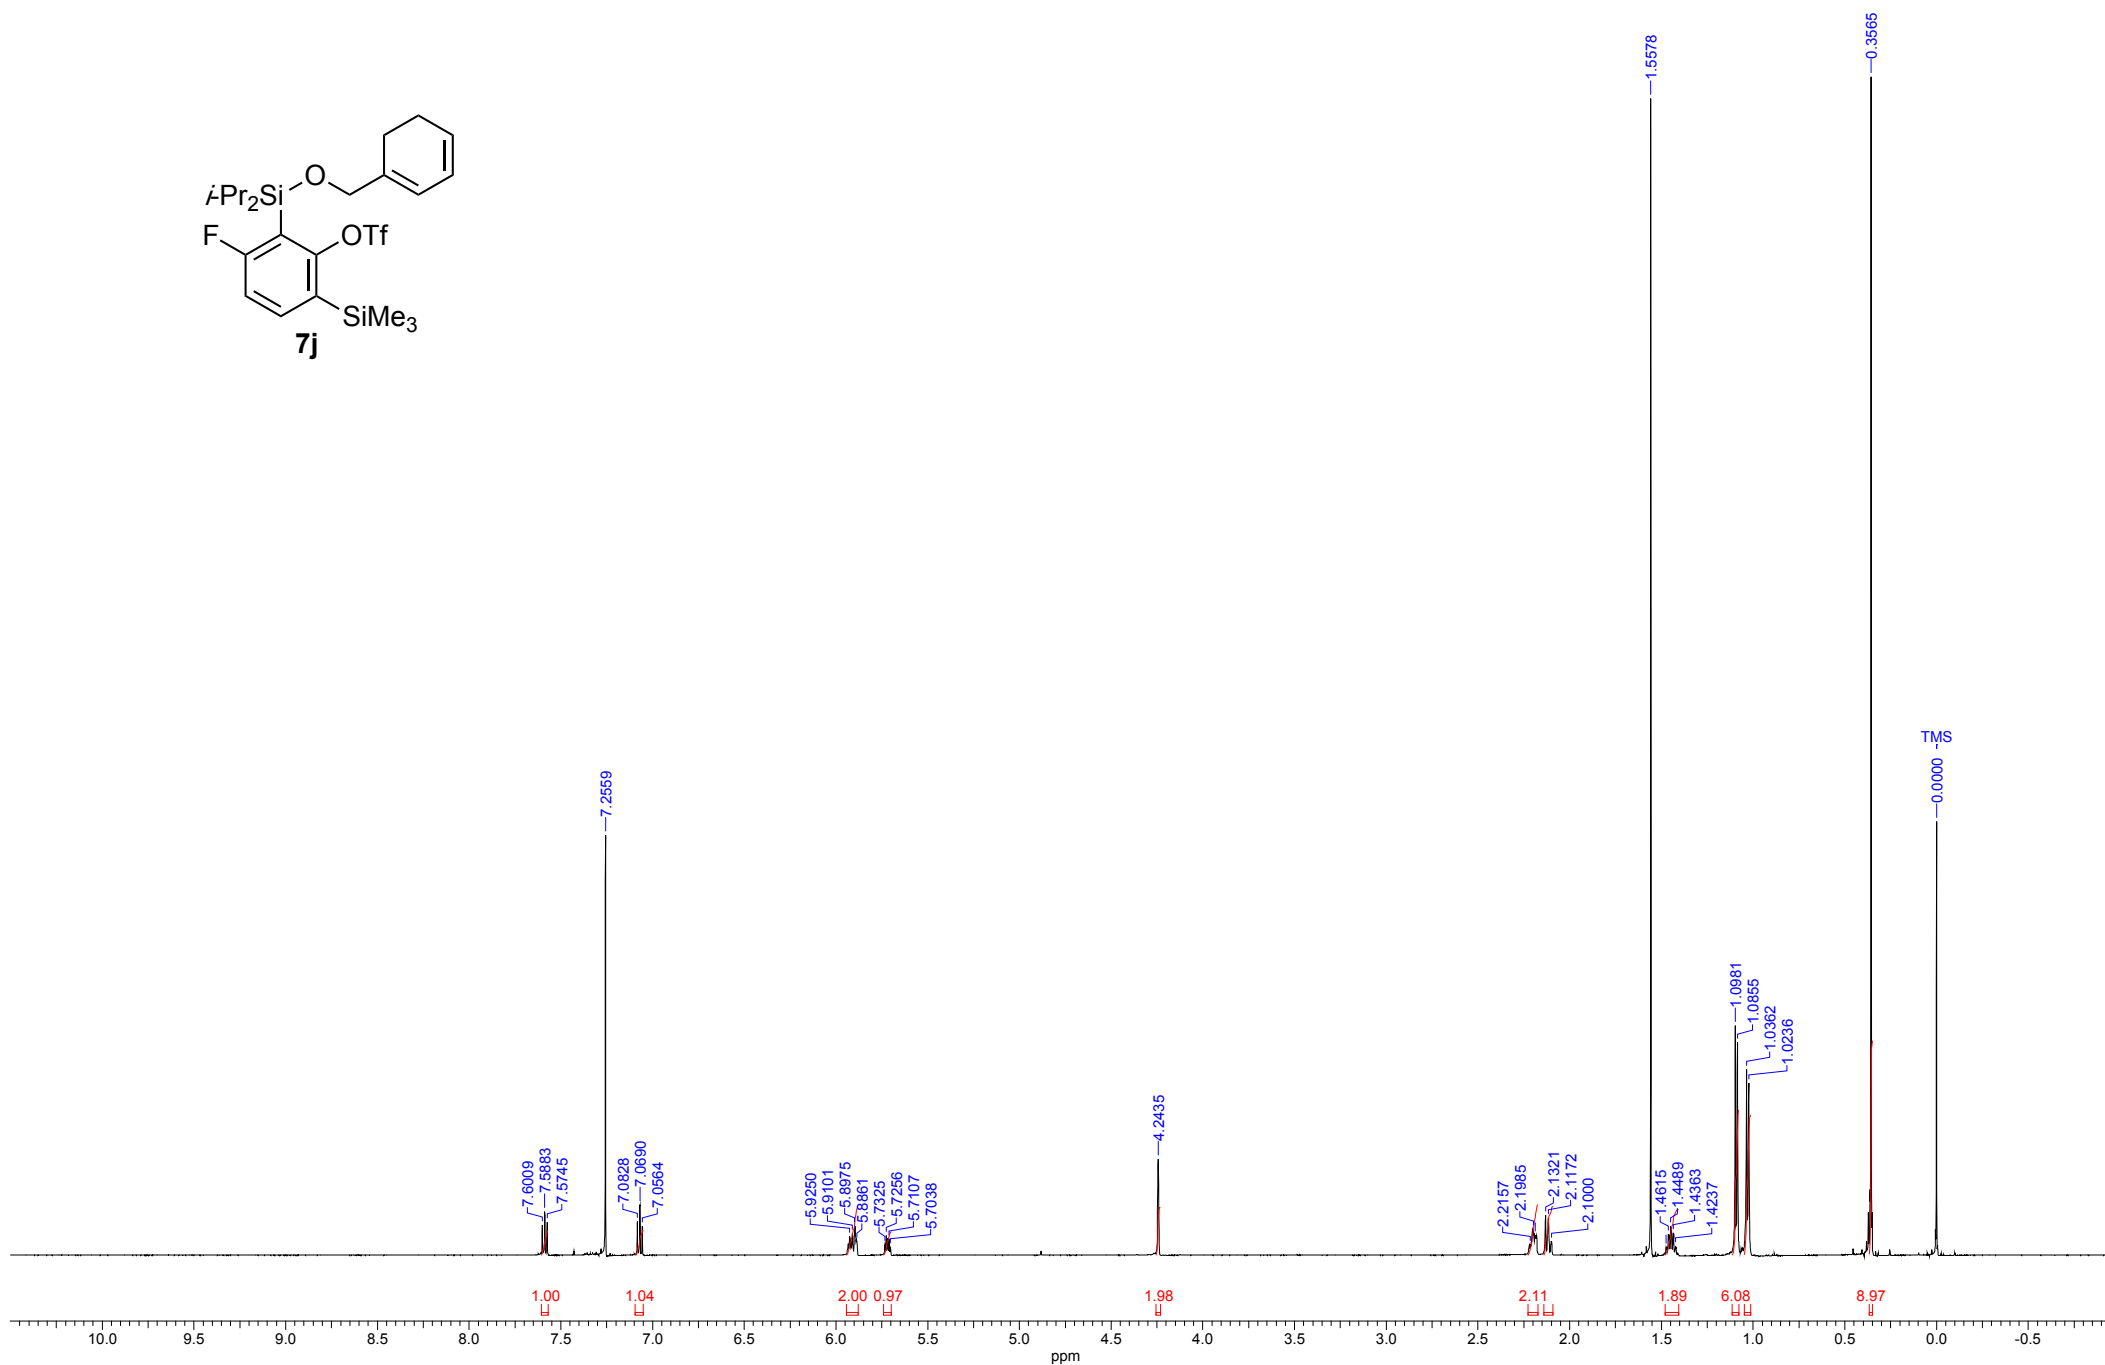

|                        |          |                        |                                  |                       |                      |              |                                                |
|------------------------|----------|------------------------|----------------------------------|-----------------------|----------------------|--------------|------------------------------------------------|
| Acquisition Time (sec) | 0.6921   | Comment                | single pulse decoupled gated NOE | Date                  | 11 Dec 2020 12:59:46 | File Name    | F:\NMR_CE_t_H\tawatari\TT0661-13C carbon-1.als |
| Frequency (MHz)        | 150.00   | Number of Transients   | 512                              | Original Points Count | 26214                | Points Count | 26214                                          |
| Sweep Width (Hz)       | 37876.77 | Temperature (degree C) | 21.000                           | Pulse Sequence        | carbon_cool.jxp      | Solvent      | CHLOROFORM-D                                   |

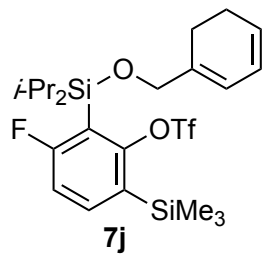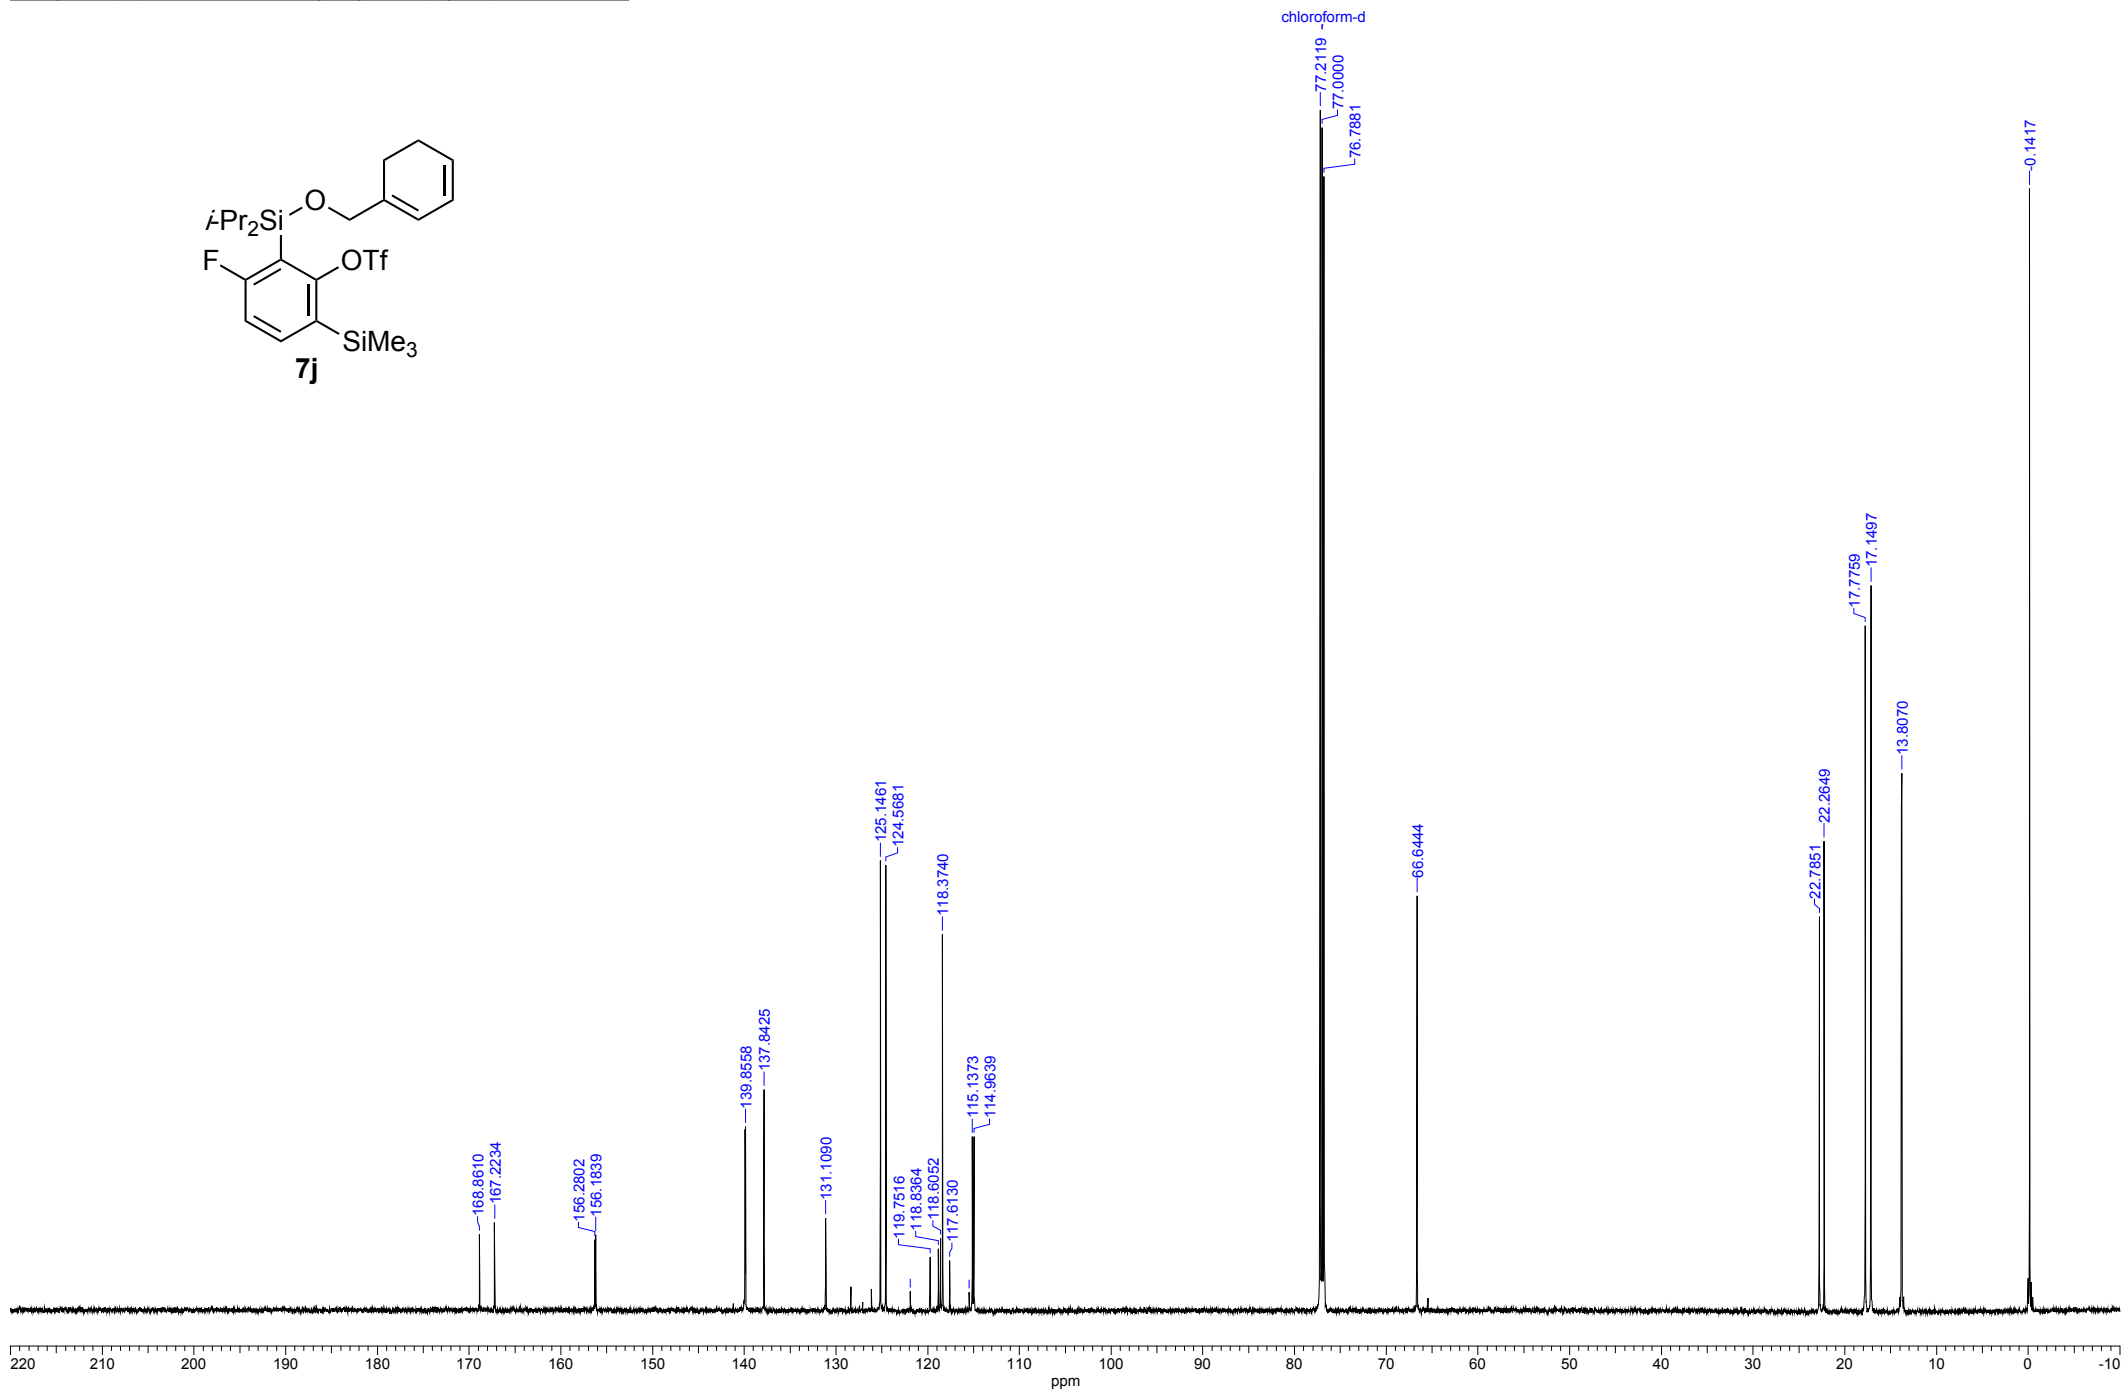

|                        |         |                        |                      |              |                                        |                 |                  |         |              |
|------------------------|---------|------------------------|----------------------|--------------|----------------------------------------|-----------------|------------------|---------|--------------|
| Acquisition Time (sec) | 3.4918  | Date                   | 07 Jul 2020 23:53:24 | File Name    | F:\NMR_CE_t_H\tawatari\TT0487-1H-1.als | Frequency (MHz) | 500.16           | Nucleus | 1H           |
| Number of Transients   | 8       | Original Points Count  | 26214                | Points Count | 26214                                  | Pulse Sequence  | single_pulse.ex2 | Solvent | CHLOROFORM-D |
| Sweep Width (Hz)       | 7507.39 | Temperature (degree C) | 22.600               |              |                                        |                 |                  |         |              |

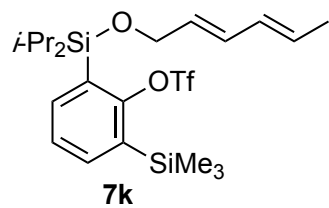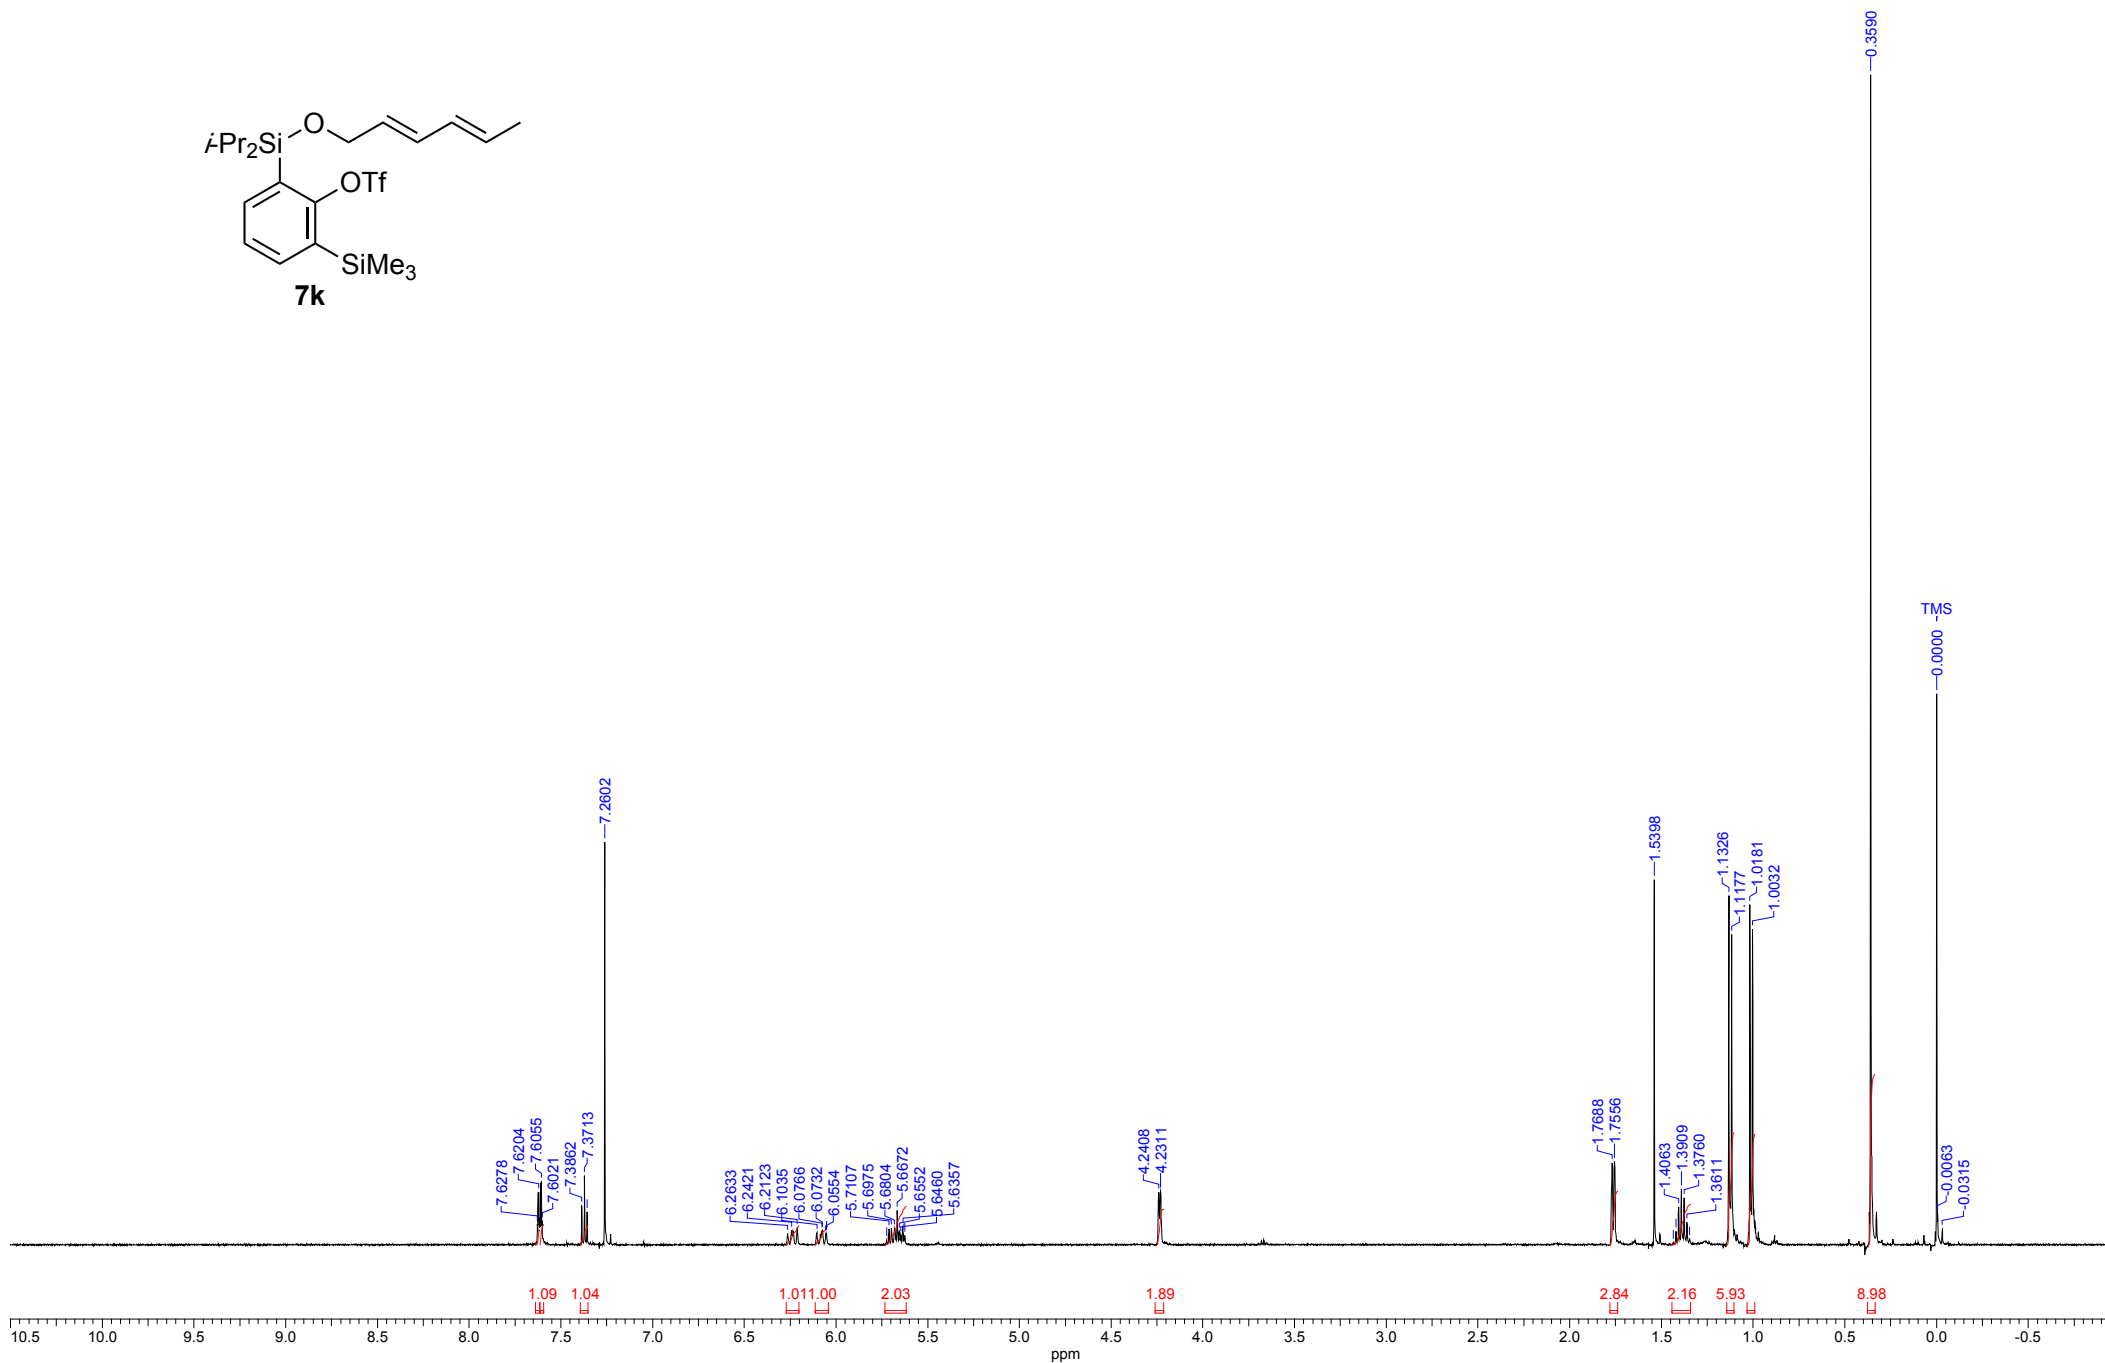

|                        |          |                        |                      |              |                                          |                 |                  |         |              |
|------------------------|----------|------------------------|----------------------|--------------|------------------------------------------|-----------------|------------------|---------|--------------|
| Acquisition Time (sec) | 0.8336   | Date                   | 07 Jul 2020 23:53:36 | File Name    | F:\NMR CE t H \tawatari\TT0487-13C-1.als | Frequency (MHz) | 125.77           | Nucleus | 13C          |
| Number of Transients   | 256      | Original Points Count  | 26214                | Points Count | 26214                                    | Pulse Sequence  | single_pulse_dec | Solvent | CHLOROFORM-D |
| Sweep Width (Hz)       | 31446.06 | Temperature (degree C) | 23.100               |              |                                          |                 |                  |         |              |

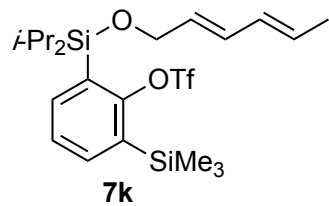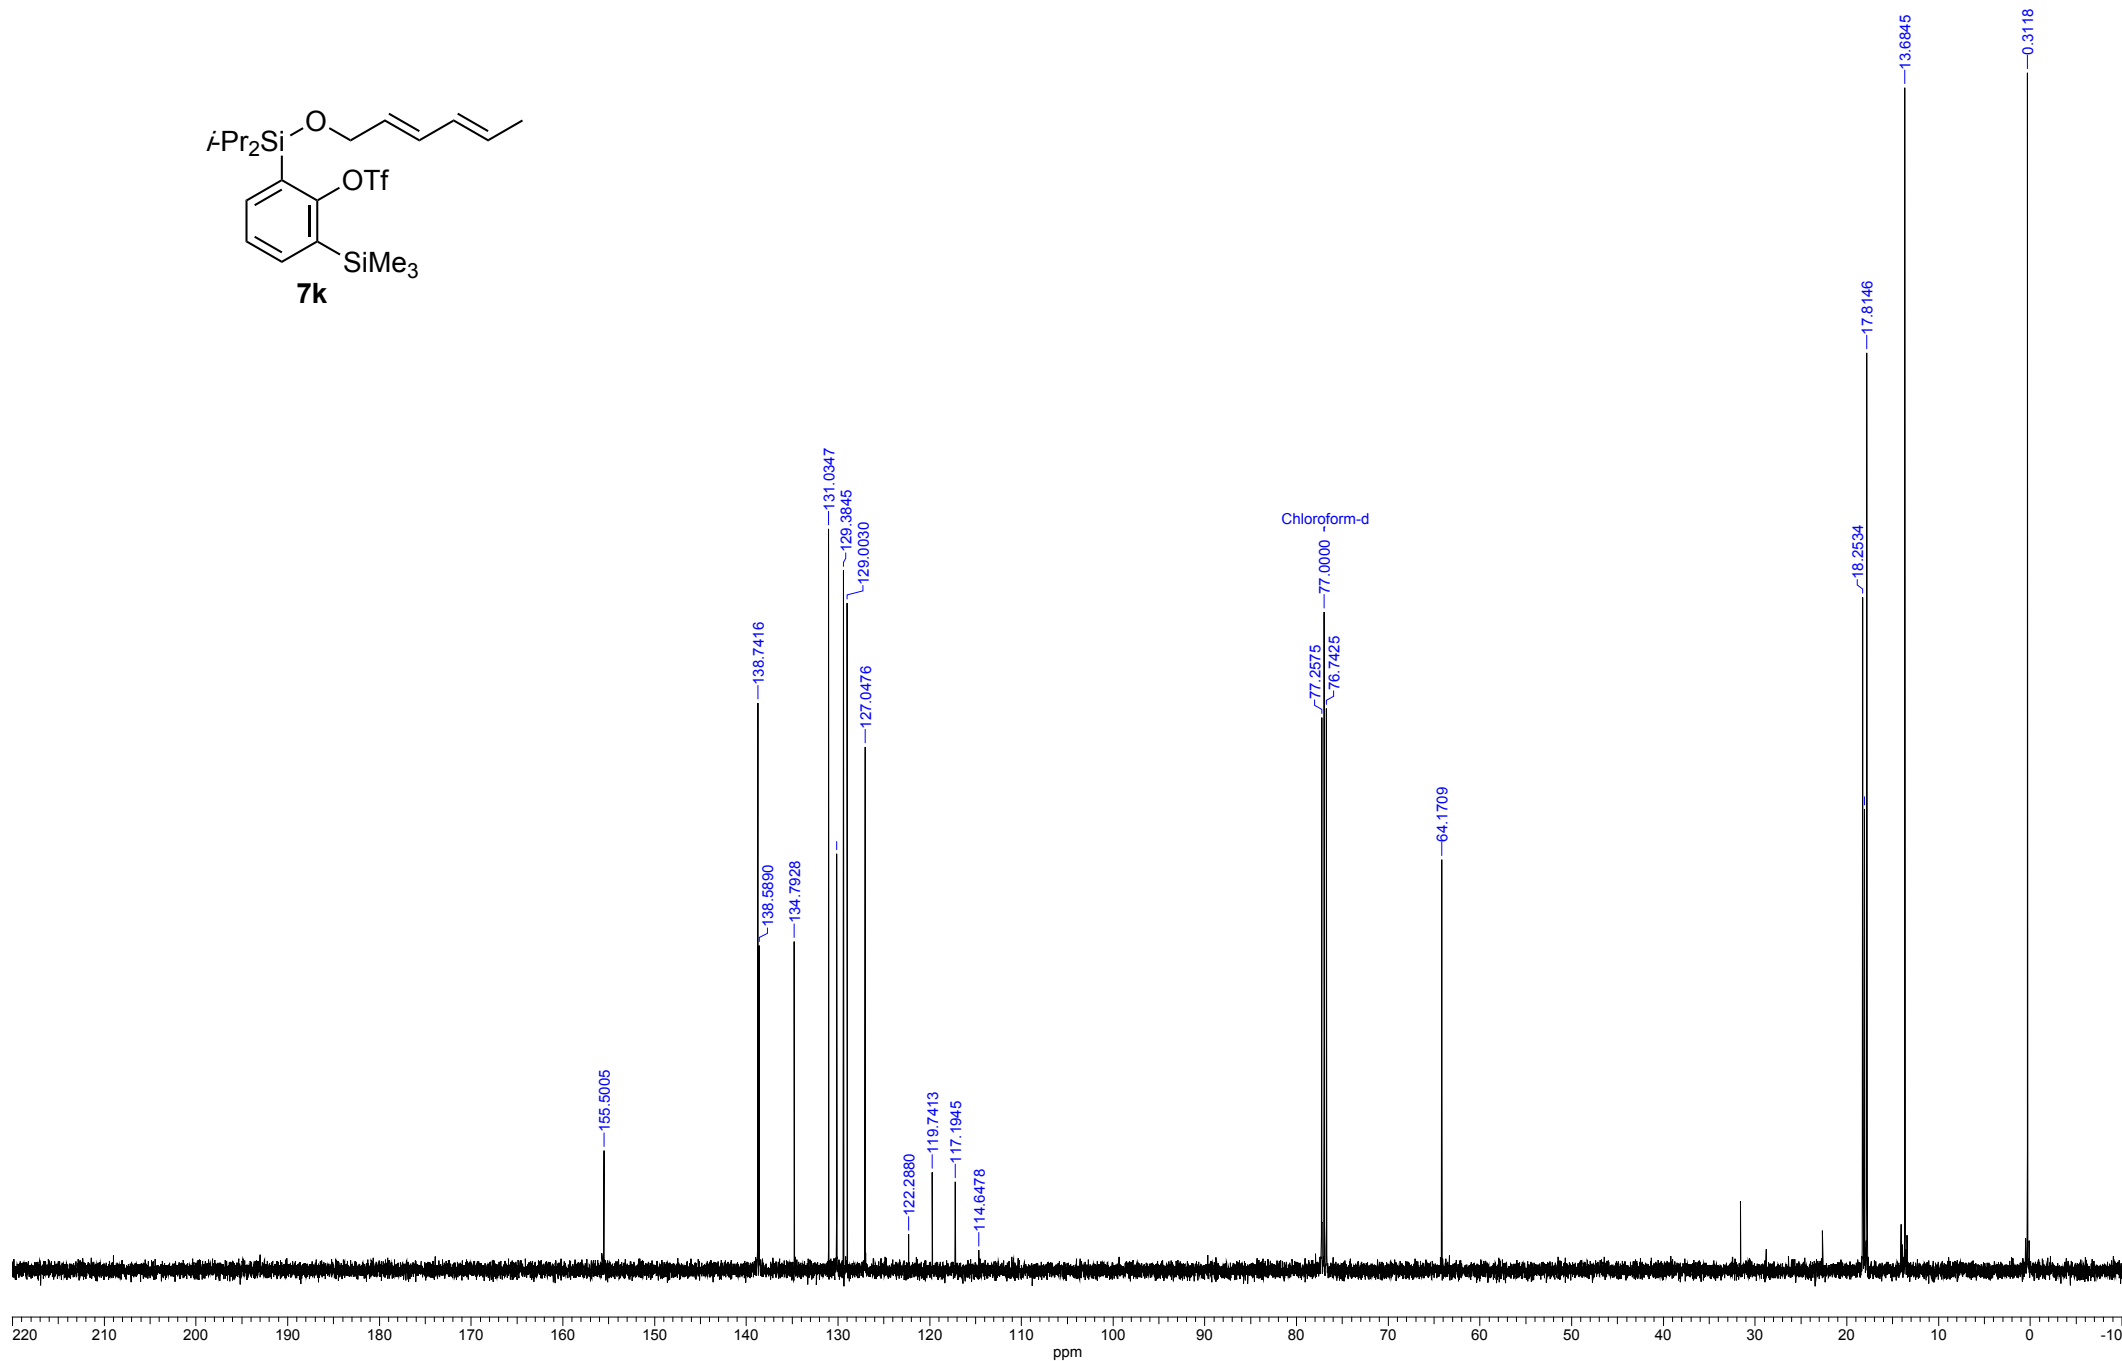

|                        |         |                        |              |                      |                      |                       |                                                  |              |
|------------------------|---------|------------------------|--------------|----------------------|----------------------|-----------------------|--------------------------------------------------|--------------|
| Acquisition Time (sec) | 1.8153  | Comment                | single pulse | Date                 | 22 Feb 2021 15:26:40 | File Name             | F:\NMR CE t H \tawatari\TT0722-1H_proton-1-1.als |              |
| Frequency (MHz)        | 600.17  | Nucleus                | 1H           | Number of Transients | 8                    | Original Points Count | 16384                                            |              |
| Sweep Width (Hz)       | 9025.27 | Temperature (degree C) | 20.000       | Points Count         | 13120                | Pulse Sequence        | proton.jxp                                       |              |
|                        |         |                        |              |                      |                      |                       | Solvent                                          | CHLOROFORM-D |

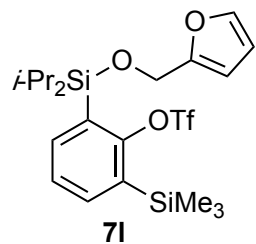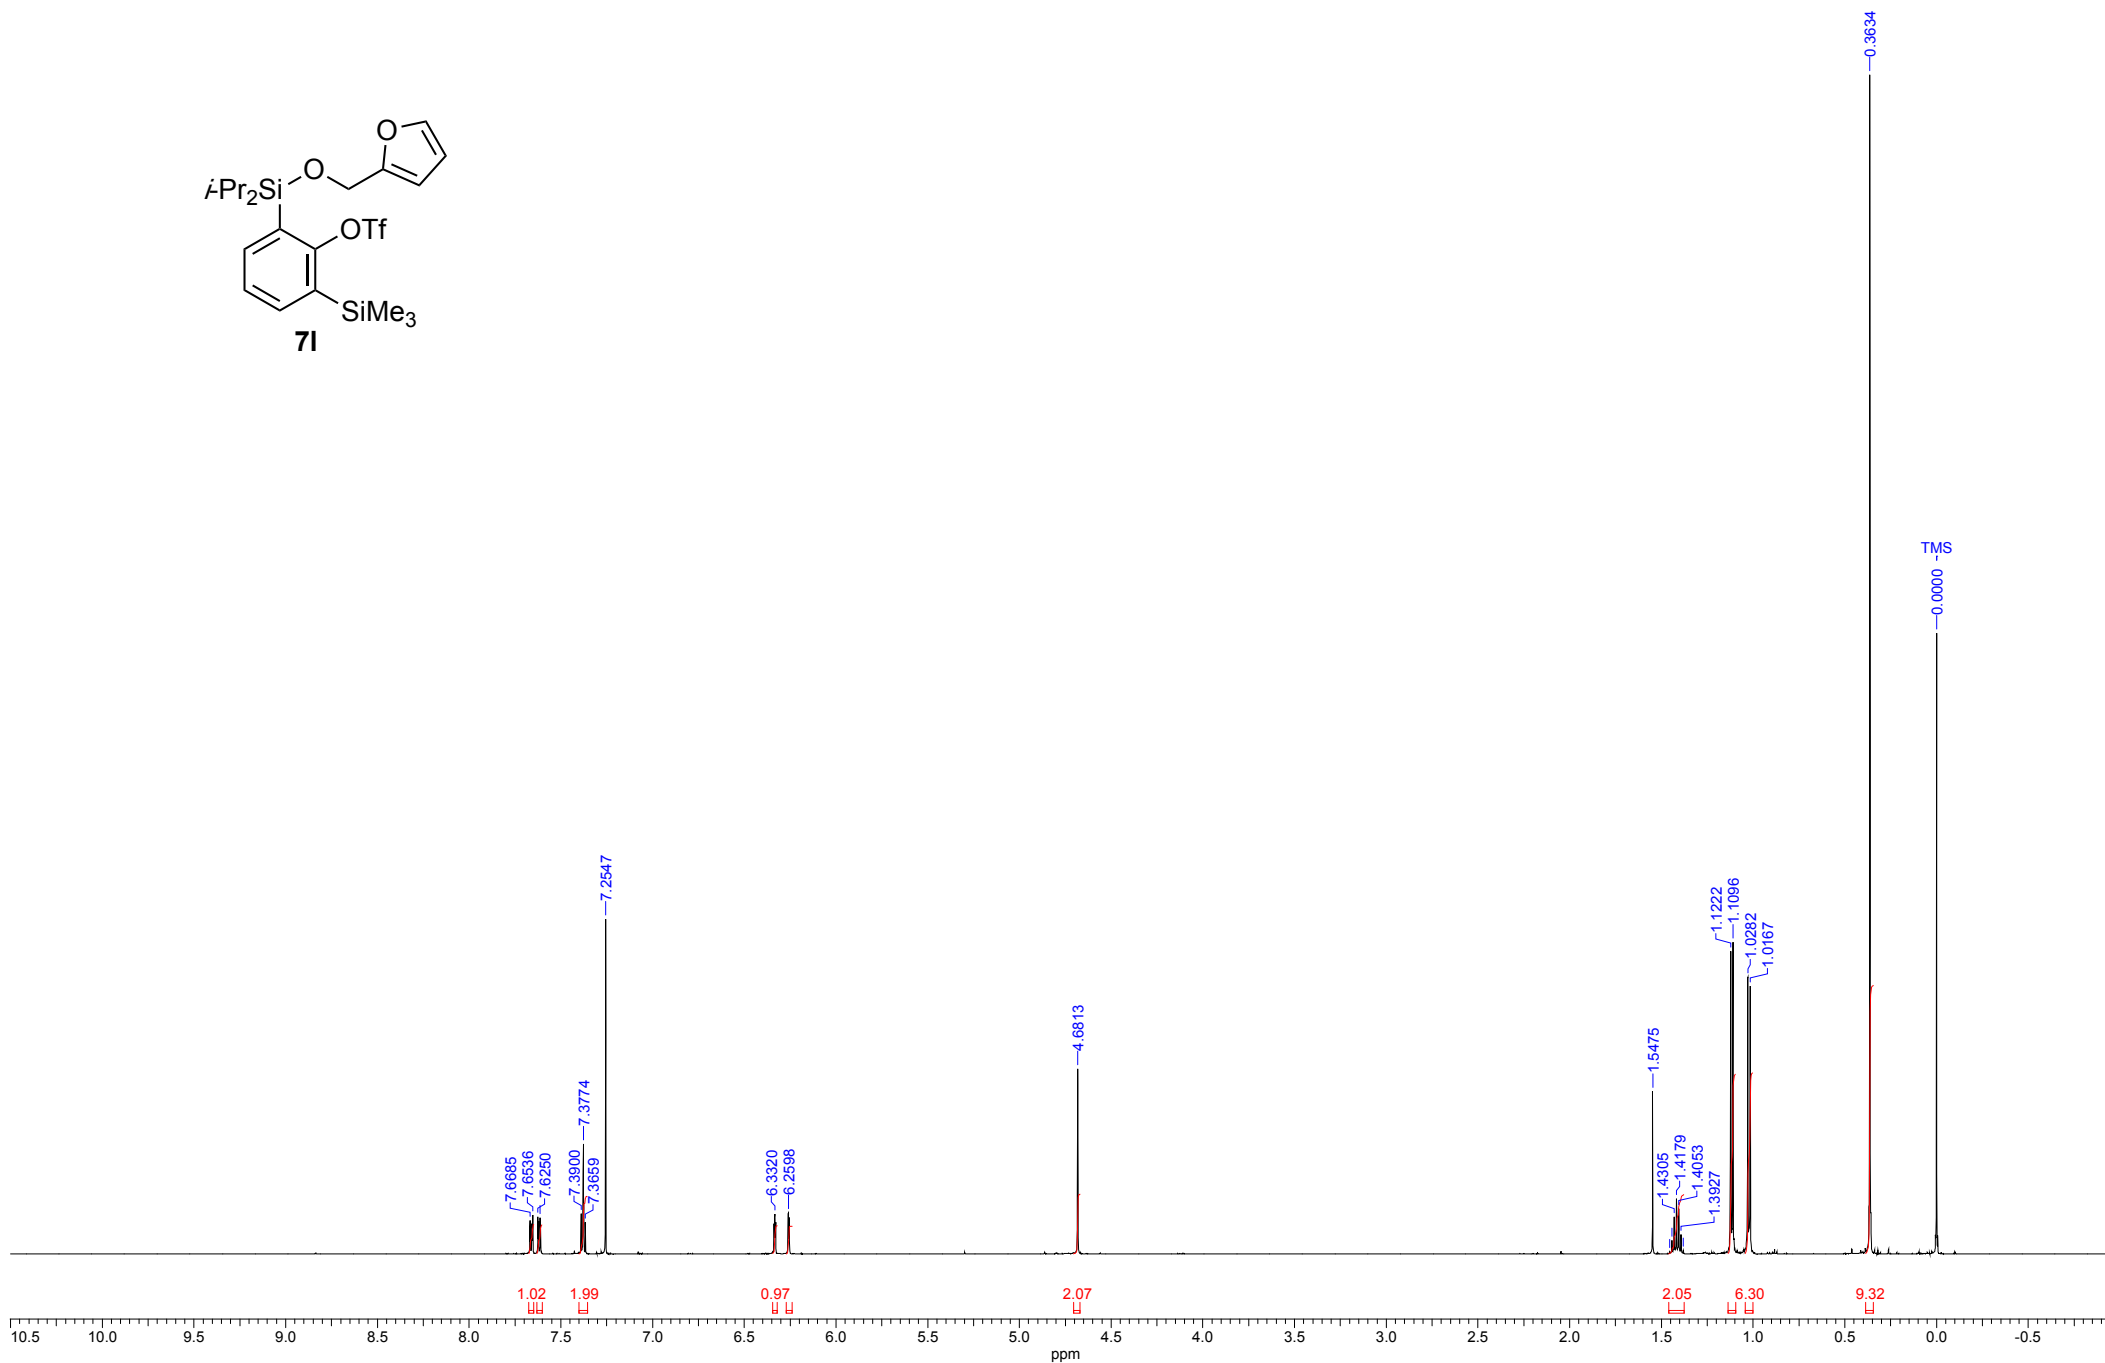

|                        |          |                        |                                  |                       |                      |              |                                                 |
|------------------------|----------|------------------------|----------------------------------|-----------------------|----------------------|--------------|-------------------------------------------------|
| Acquisition Time (sec) | 0.6921   | Comment                | single pulse decoupled gated NOE | Date                  | 22 Feb 2021 15:26:20 | File Name    | F:\NMR CE t H \tawatari\TT0722-13C carbon-1.als |
| Frequency (MHz)        | 150.00   | Number of Transients   | 256                              | Original Points Count | 26214                | Points Count | 26214                                           |
| Sweep Width (Hz)       | 37876.77 | Temperature (degree C) | 20.300                           | Pulse Sequence        | carbon_cool.jxp      | Solvent      | CHLOROFORM-D                                    |

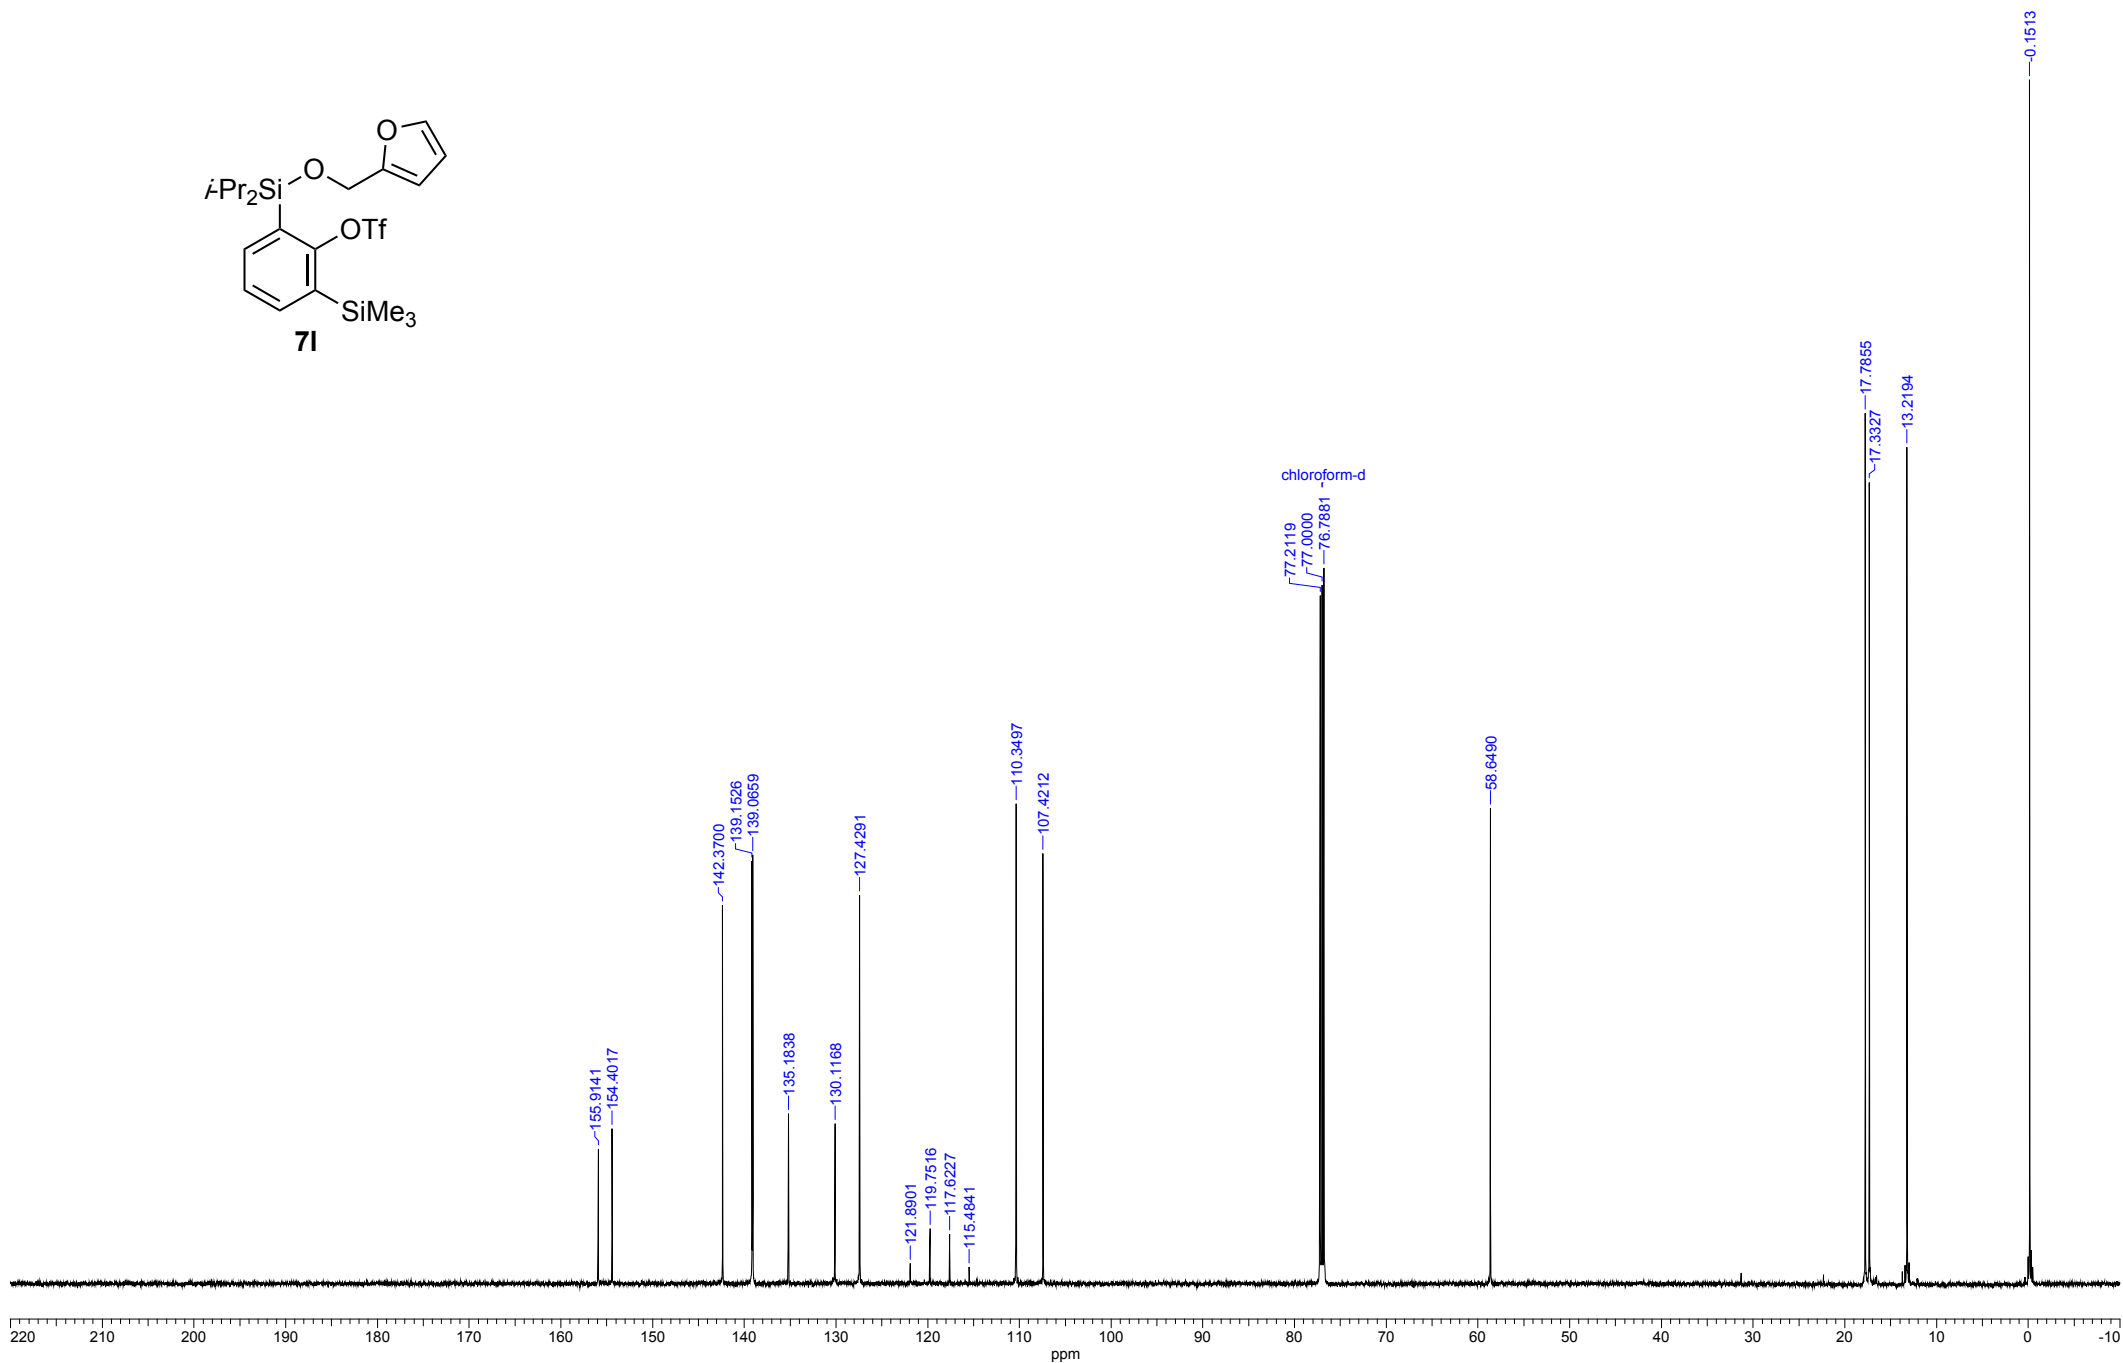

|                        |         |                        |              |                      |                      |                       |                                                  |              |
|------------------------|---------|------------------------|--------------|----------------------|----------------------|-----------------------|--------------------------------------------------|--------------|
| Acquisition Time (sec) | 1.8153  | Comment                | single pulse | Date                 | 22 Dec 2020 20:37:36 | File Name             | F:\NMR CE t H \tawatari\TT0669-1H_proton-1-1.als |              |
| Frequency (MHz)        | 600.17  | Nucleus                | 1H           | Number of Transients | 8                    | Original Points Count | 16384                                            |              |
| Sweep Width (Hz)       | 9025.27 | Temperature (degree C) | 19.300       | Points Count         | 13120                | Pulse Sequence        | proton.jxp                                       |              |
|                        |         |                        |              |                      |                      |                       | Solvent                                          | CHLOROFORM-D |

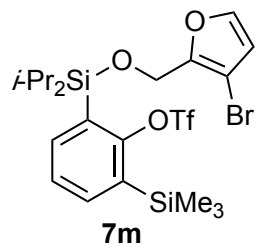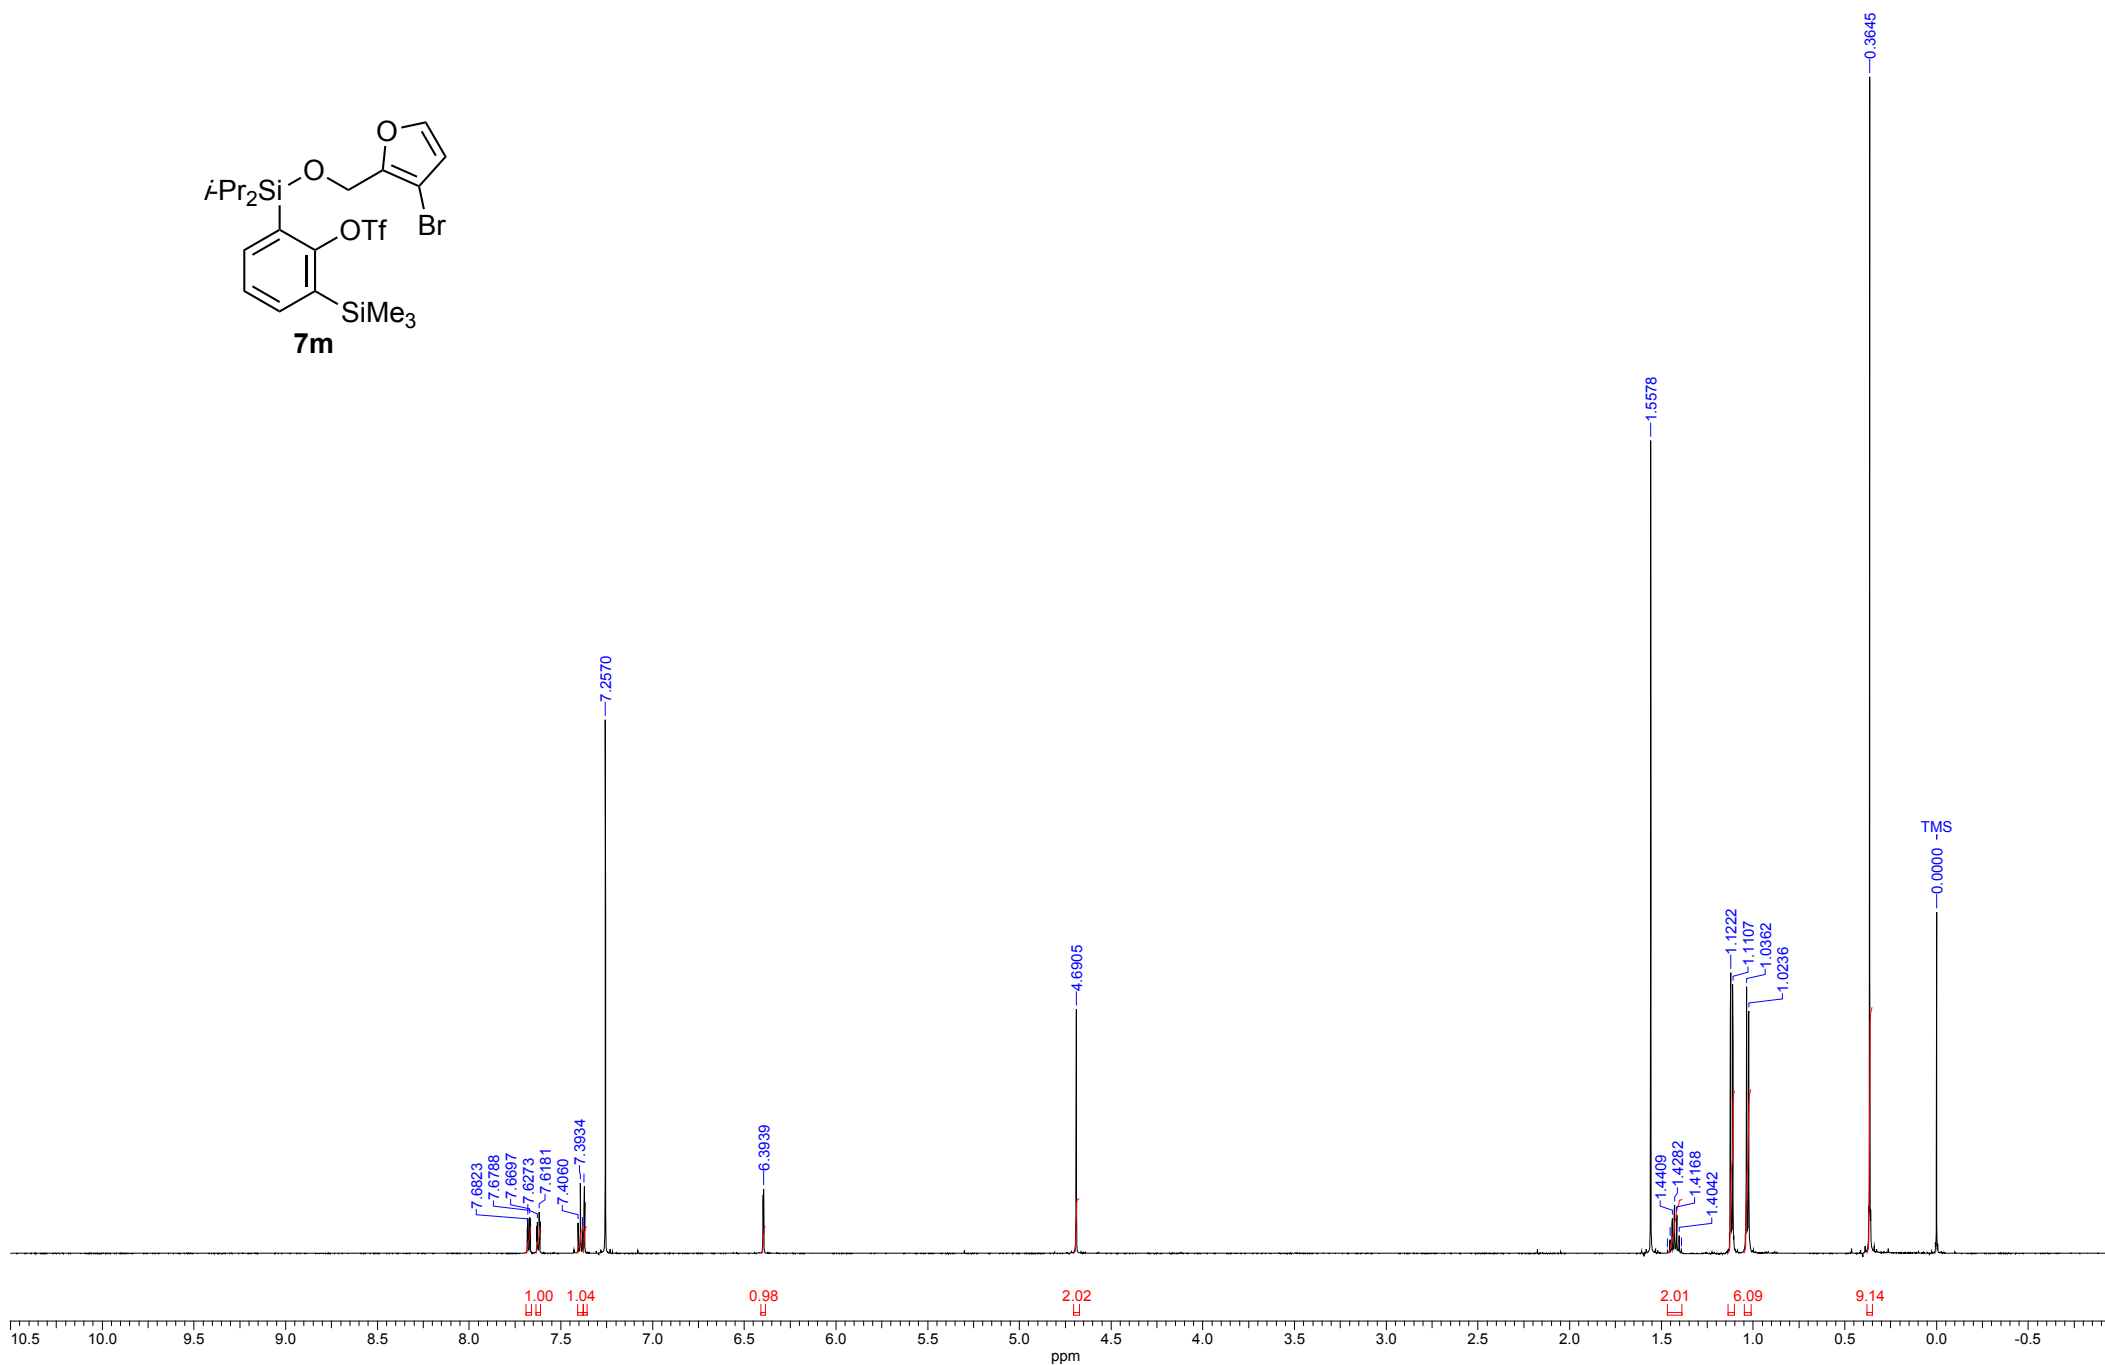



|                        |          |                        |                                  |                       |                      |                |                                                |
|------------------------|----------|------------------------|----------------------------------|-----------------------|----------------------|----------------|------------------------------------------------|
| Acquisition Time (sec) | 0.6921   | Comment                | single pulse decoupled gated NOE | Date                  | 22 Dec 2020 20:32:48 | File Name      | F:\NMR_CE_t_H\tawatari\TT0669-13C carbon-1.als |
| Frequency (MHz)        | 150.00   | Number of Transients   | 256                              | Points Count          | 26214                | Pulse Sequence | carbon_cool.jxp                                |
| Sweep Width (Hz)       | 37876.77 | Temperature (degree C) | 19.400                           | Original Points Count | 26214                | Solvent        | CHLOROFORM-D                                   |

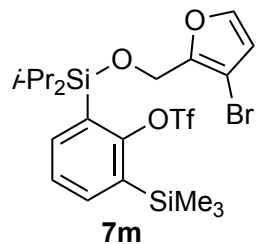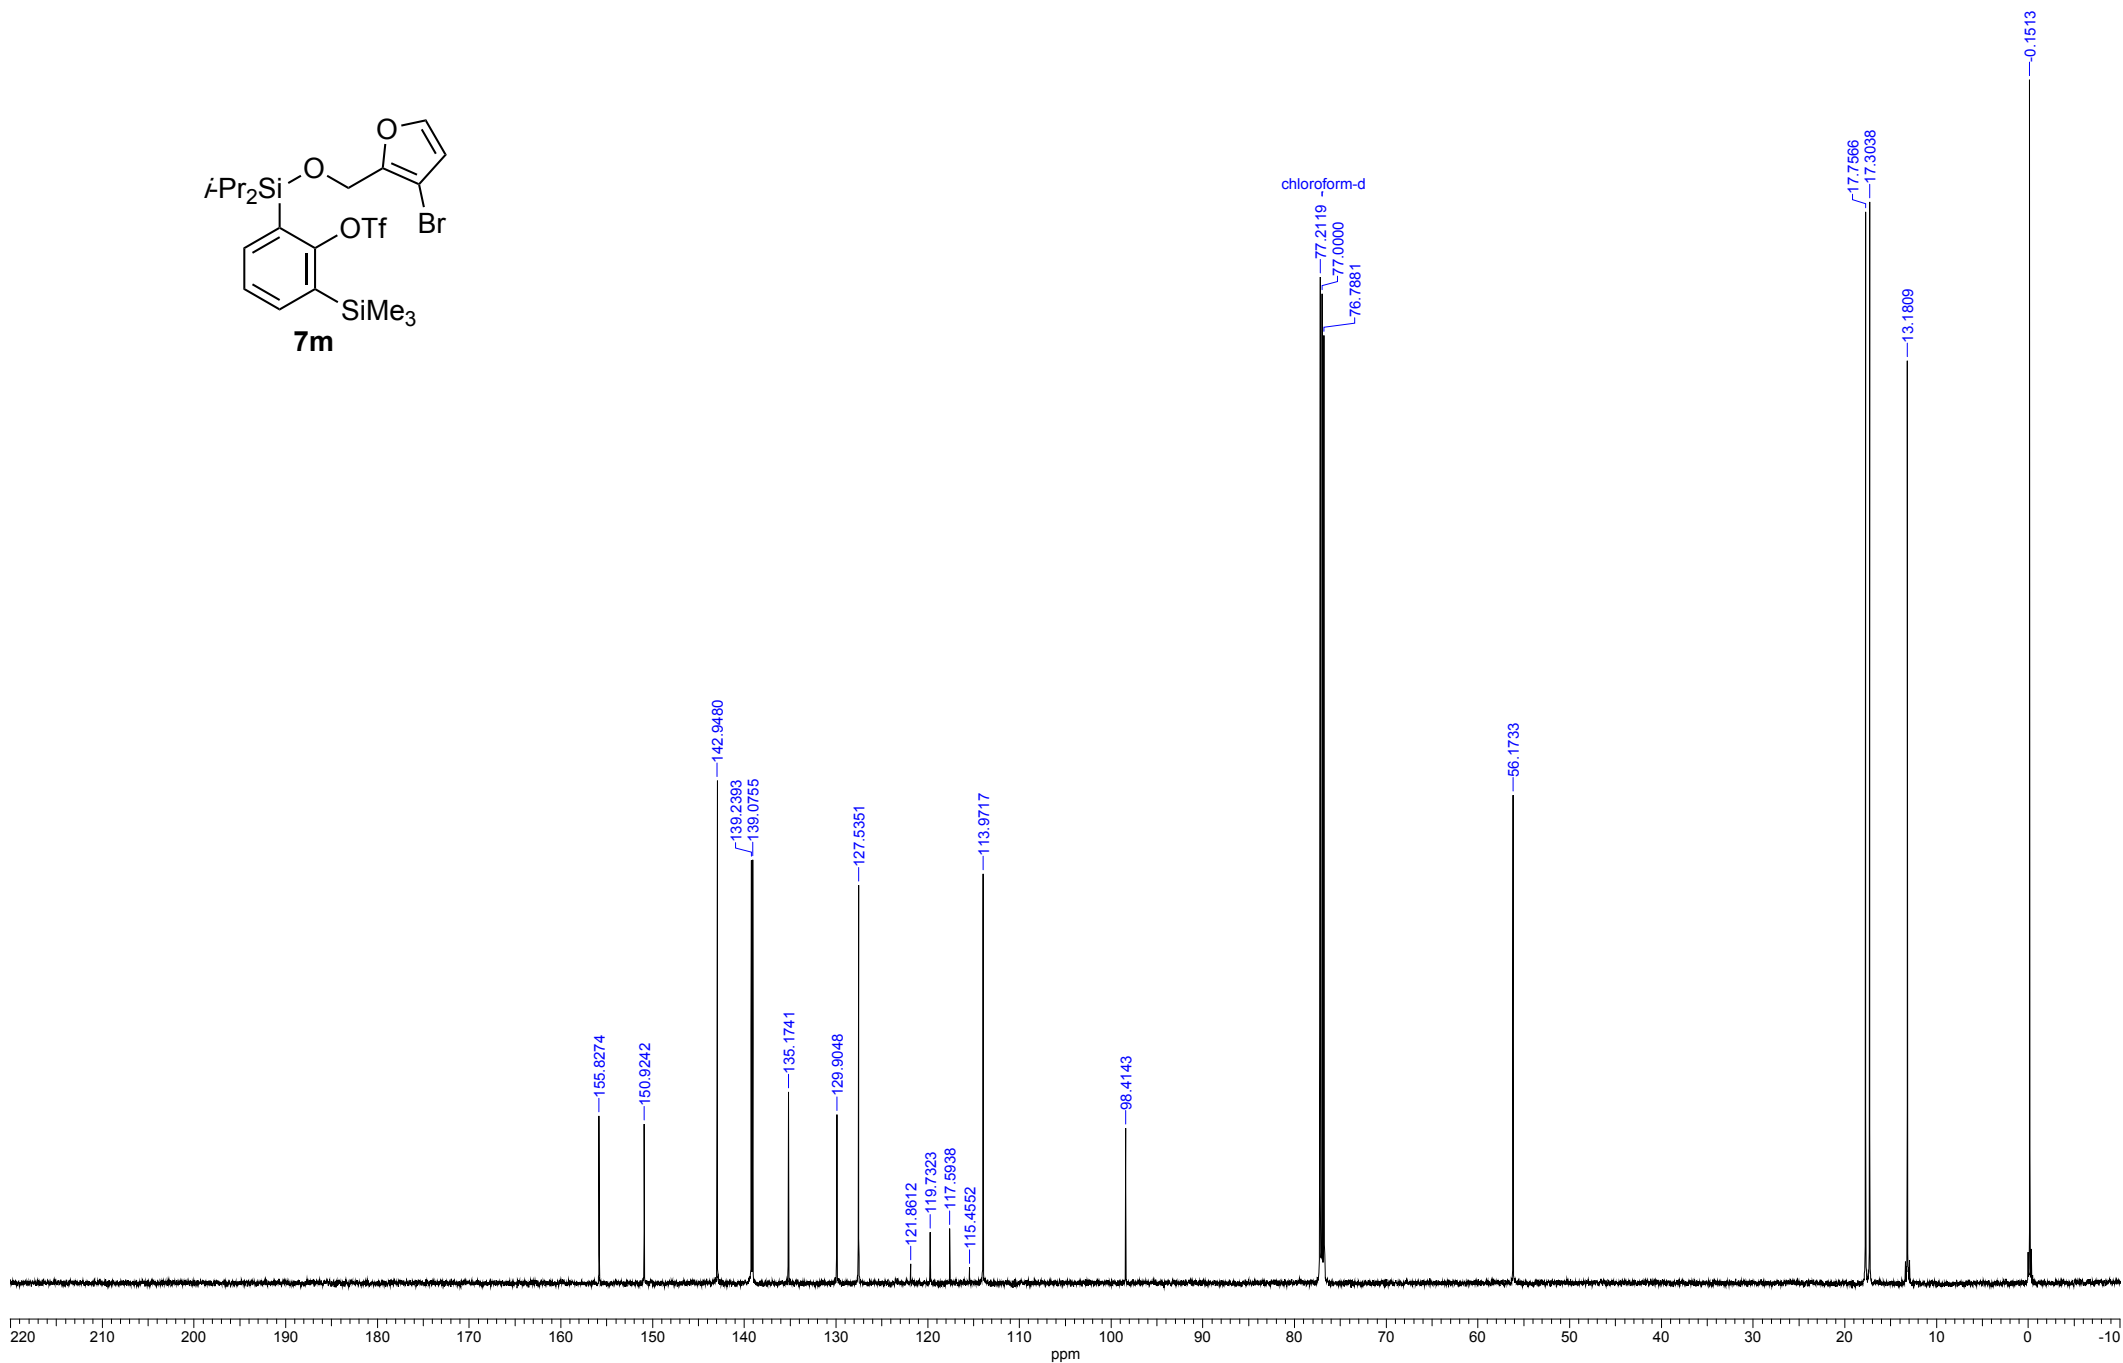

|                        |         |                        |              |                      |                      |                       |                                                  |              |
|------------------------|---------|------------------------|--------------|----------------------|----------------------|-----------------------|--------------------------------------------------|--------------|
| Acquisition Time (sec) | 1.8153  | Comment                | single pulse | Date                 | 24 Feb 2021 16:28:08 | File Name             | F:\NMR CE t H \tawatari\TT0728-1H_proton-1-1.als |              |
| Frequency (MHz)        | 600.17  | Nucleus                | 1H           | Number of Transients | 8                    | Original Points Count | 16384                                            |              |
| Sweep Width (Hz)       | 9025.27 | Temperature (degree C) | 20.500       | Points Count         | 13120                | Pulse Sequence        | proton.jxp                                       |              |
|                        |         |                        |              |                      |                      |                       | Solvent                                          | CHLOROFORM-D |

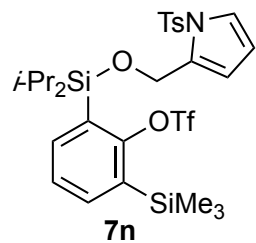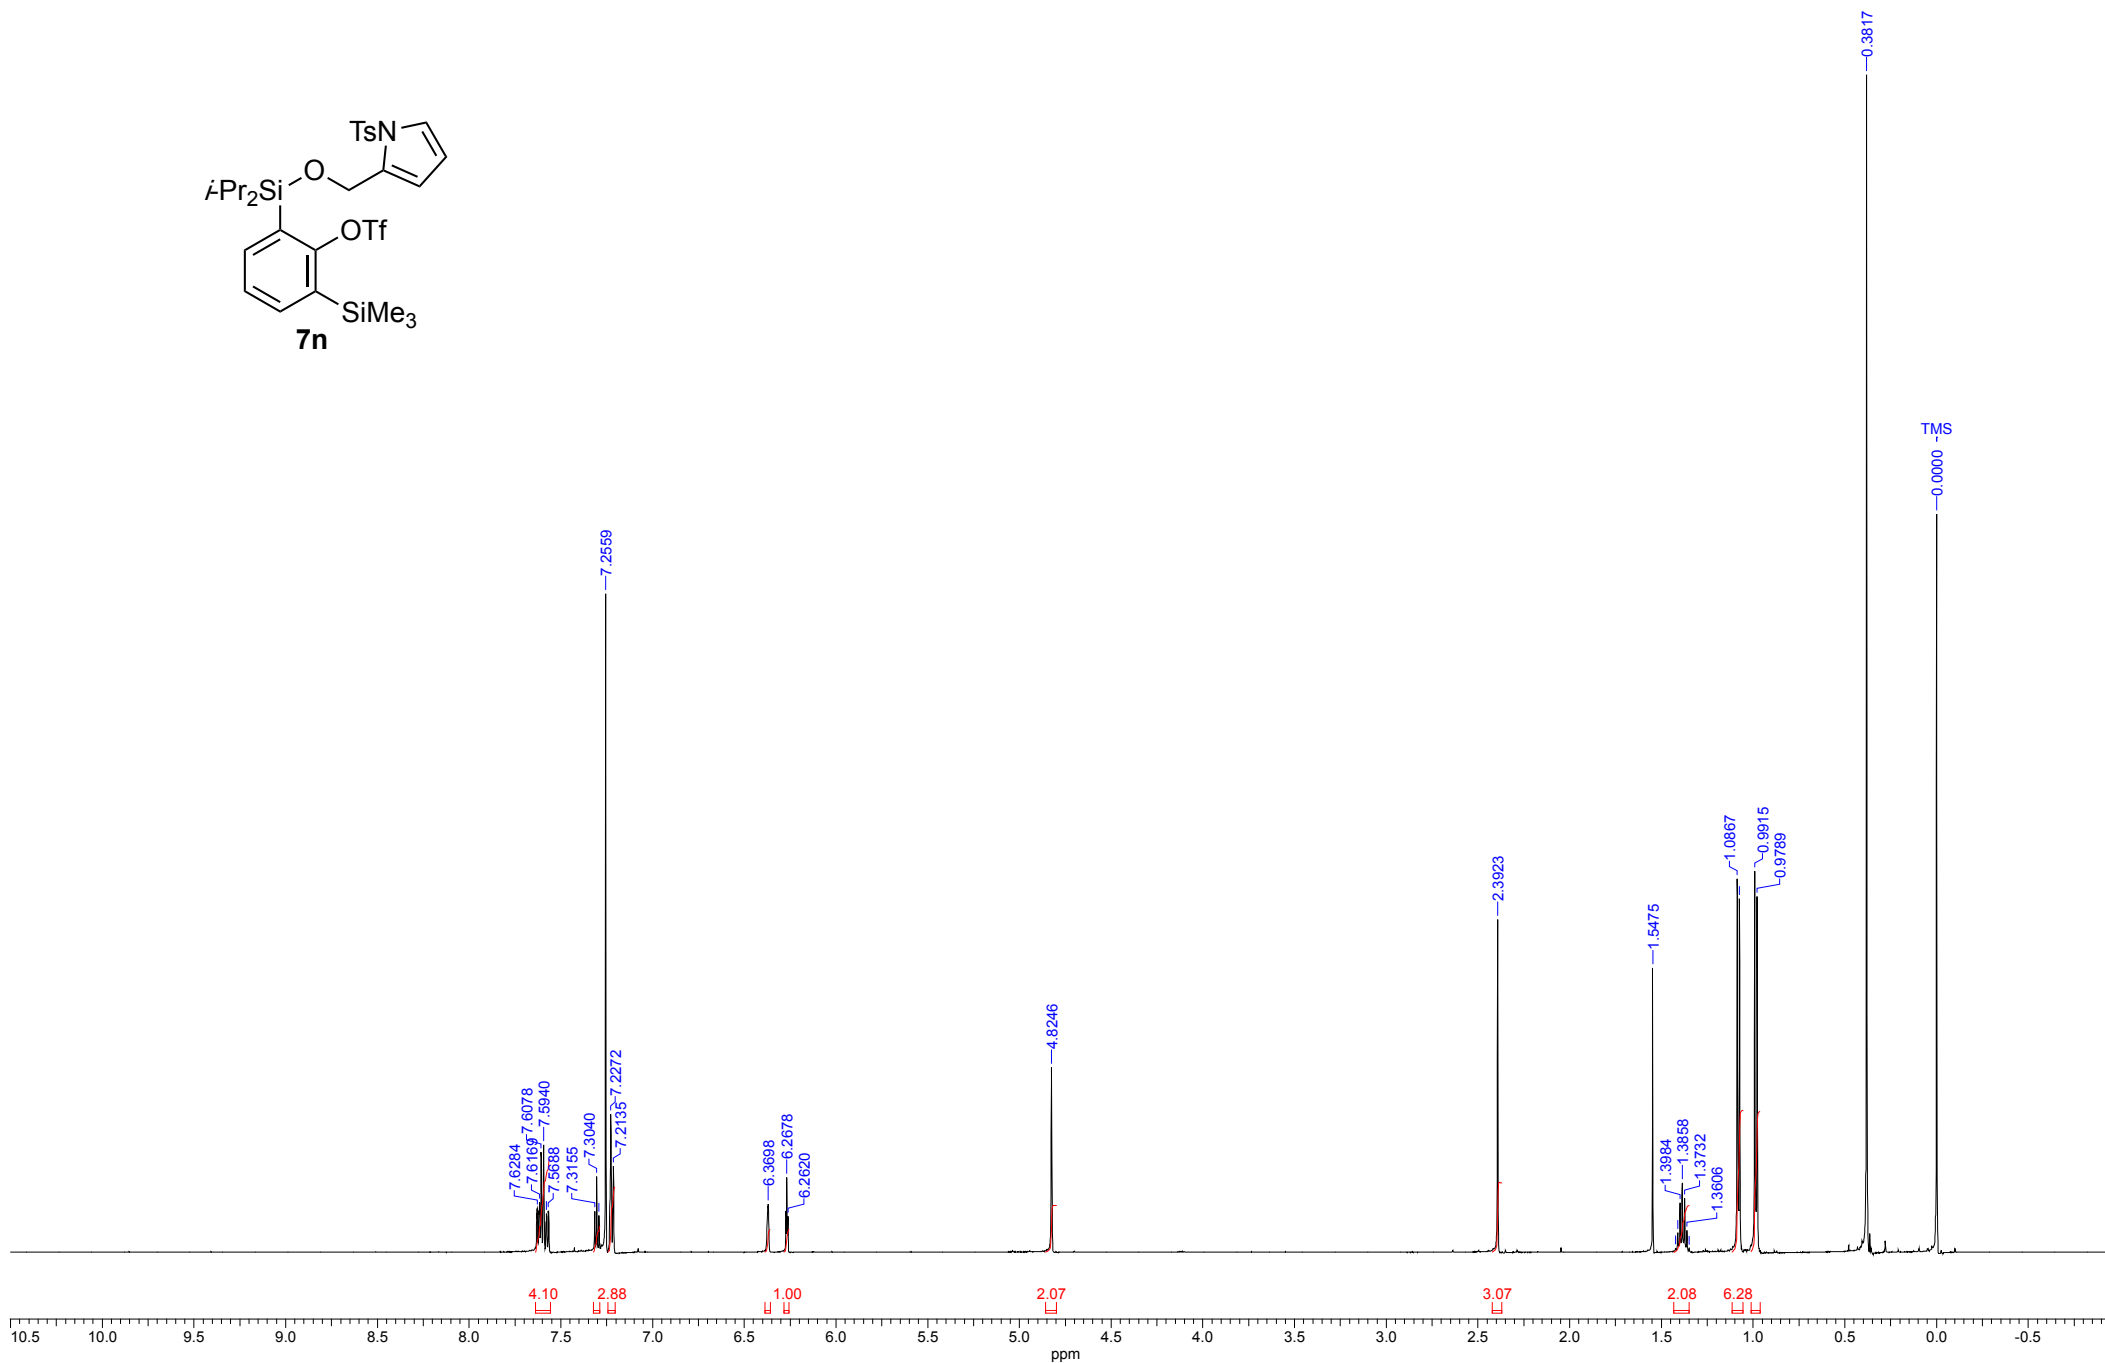

|                        |          |                        |                                  |                       |                      |              |                                                 |
|------------------------|----------|------------------------|----------------------------------|-----------------------|----------------------|--------------|-------------------------------------------------|
| Acquisition Time (sec) | 0.6921   | Comment                | single pulse decoupled gated NOE | Date                  | 24 Feb 2021 16:27:50 | File Name    | F:\NMR_CE t H \tawatari\TT0728-13C carbon-1.als |
| Frequency (MHz)        | 150.00   | Number of Transients   | 257                              | Original Points Count | 26214                | Points Count | 26214                                           |
| Sweep Width (Hz)       | 37876.77 | Temperature (degree C) | 20.800                           | Pulse Sequence        | carbon_cool.jxp      | Solvent      | CHLOROFORM-D                                    |

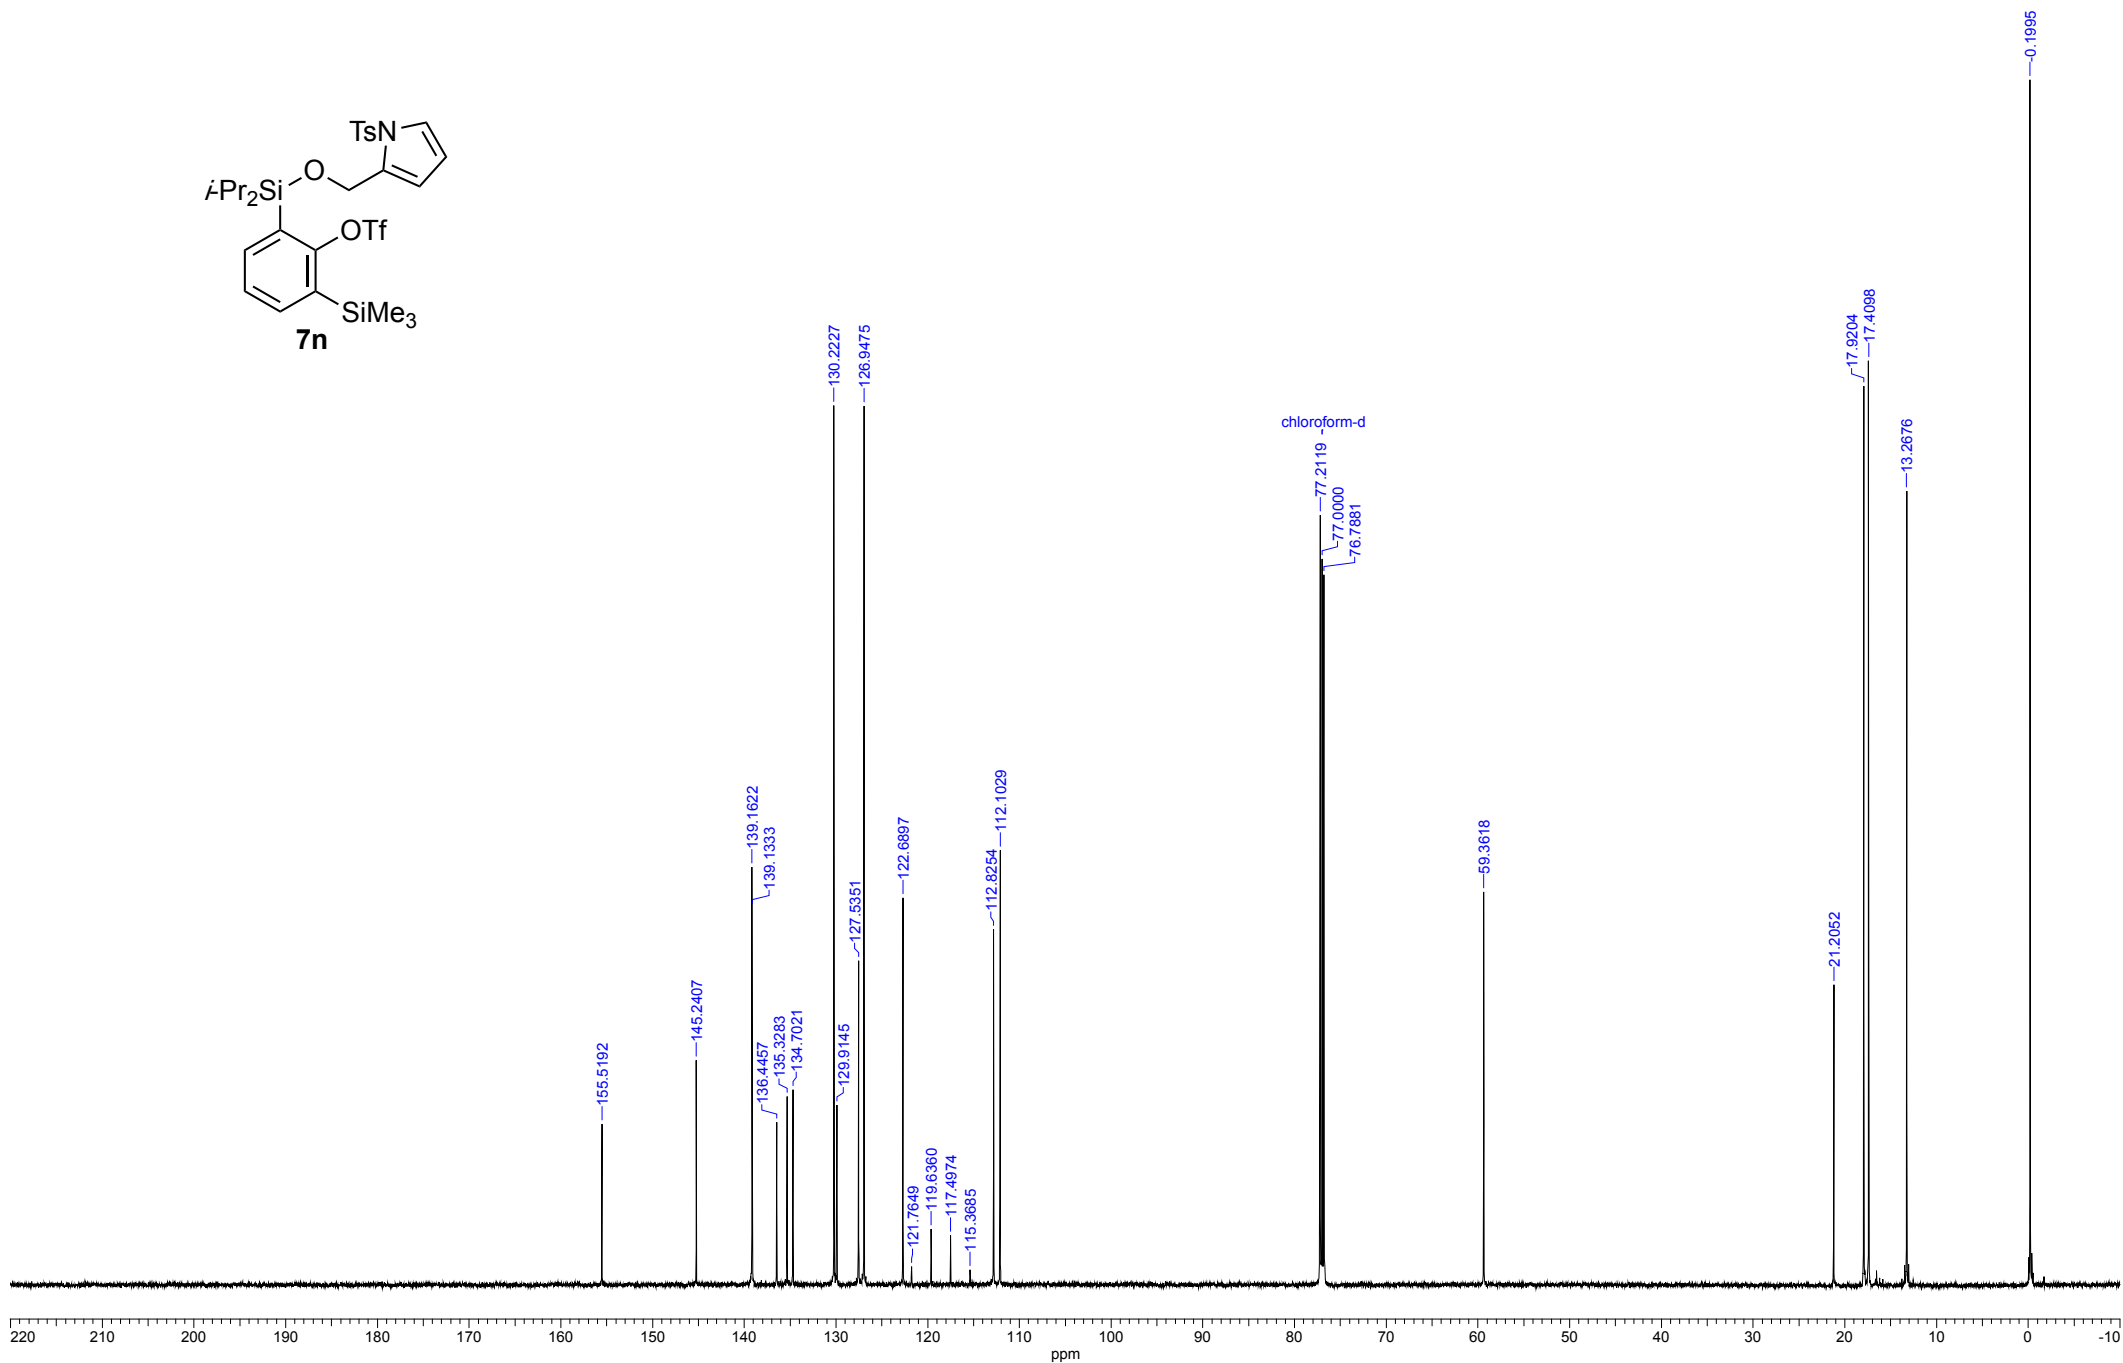

|                        |         |                        |                      |              |                                                 |                 |                  |         |              |
|------------------------|---------|------------------------|----------------------|--------------|-------------------------------------------------|-----------------|------------------|---------|--------------|
| Acquisition Time (sec) | 3.4918  | Date                   | 24 Jun 2021 20:43:44 | File Name    | F:\NMR_CE_t_H\tawataril\compound10\proton-2.als | Frequency (MHz) | 500.16           | Nucleus | 1H           |
| Number of Transients   | 8       | Original Points Count  | 26214                | Points Count | 26214                                           | Pulse Sequence  | single_pulse.ex2 | Solvent | CHLOROFORM-D |
| Sweep Width (Hz)       | 7507.39 | Temperature (degree C) | 20.200               |              |                                                 |                 |                  |         |              |

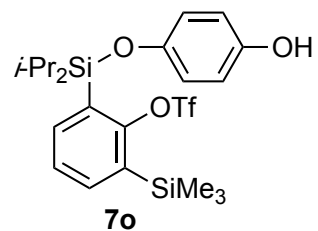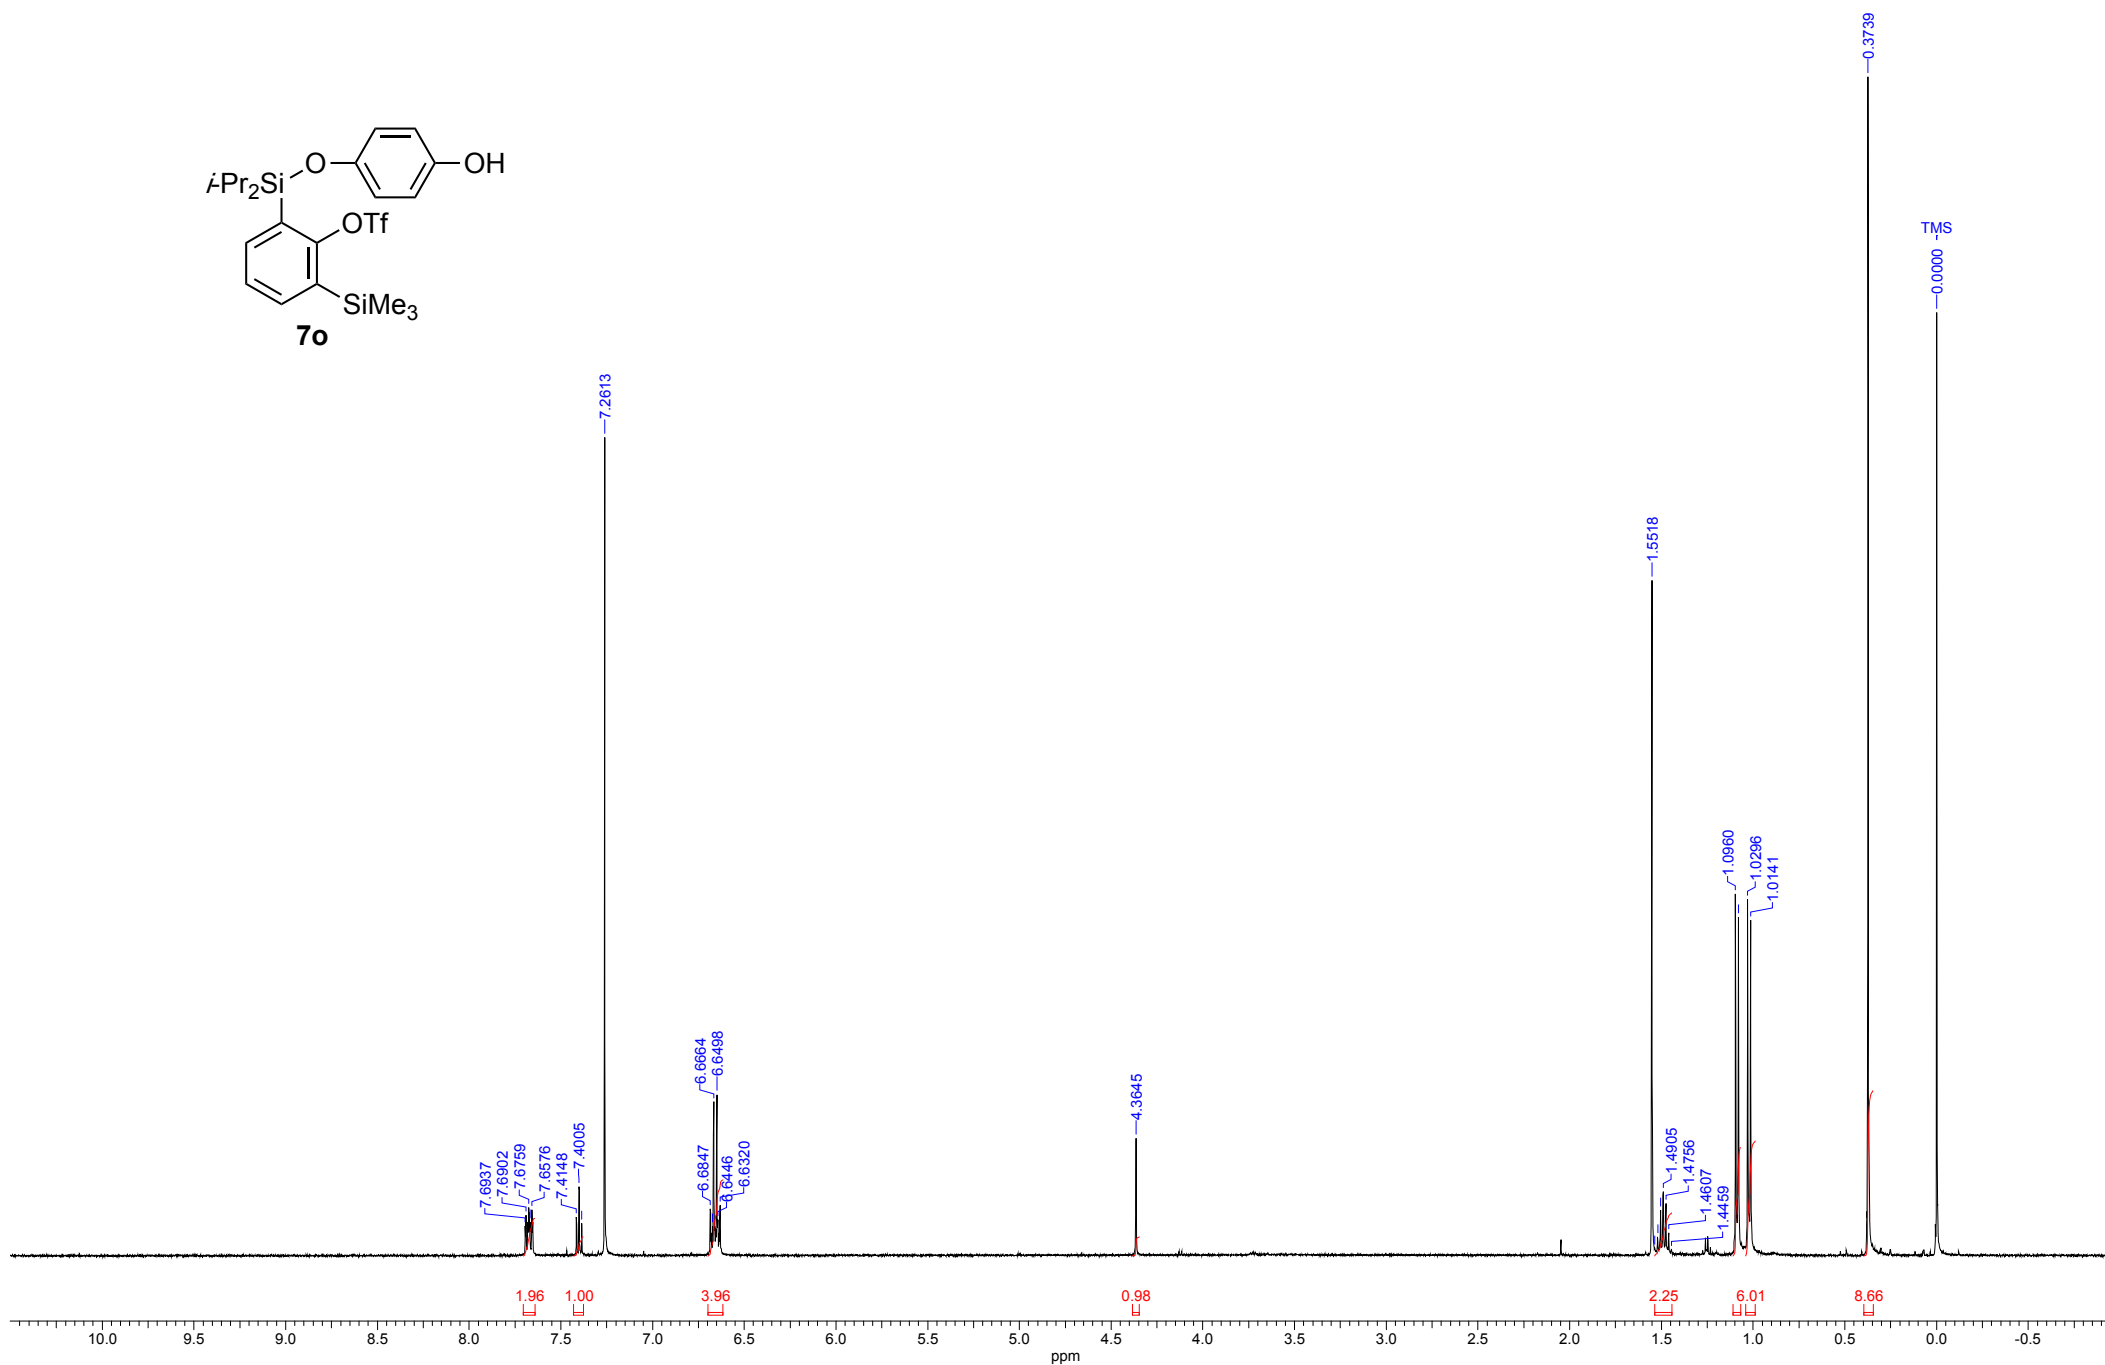

|                        |          |                        |                      |              |                                               |                 |                  |         |              |
|------------------------|----------|------------------------|----------------------|--------------|-----------------------------------------------|-----------------|------------------|---------|--------------|
| Acquisition Time (sec) | 0.8336   | Date                   | 24 Jun 2021 20:44:02 | File Name    | F:\NMR CE t H \tawatar\compound10carbon-2.als | Frequency (MHz) | 125.77           | Nucleus | 13C          |
| Number of Transients   | 256      | Original Points Count  | 26214                | Points Count | 26214                                         | Pulse Sequence  | single_pulse_dec | Solvent | CHLOROFORM-D |
| Sweep Width (Hz)       | 31446.06 | Temperature (degree C) | 20.900               |              |                                               |                 |                  |         |              |

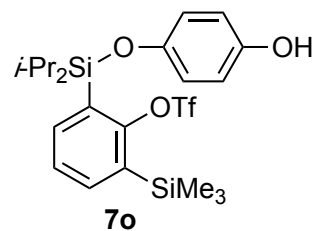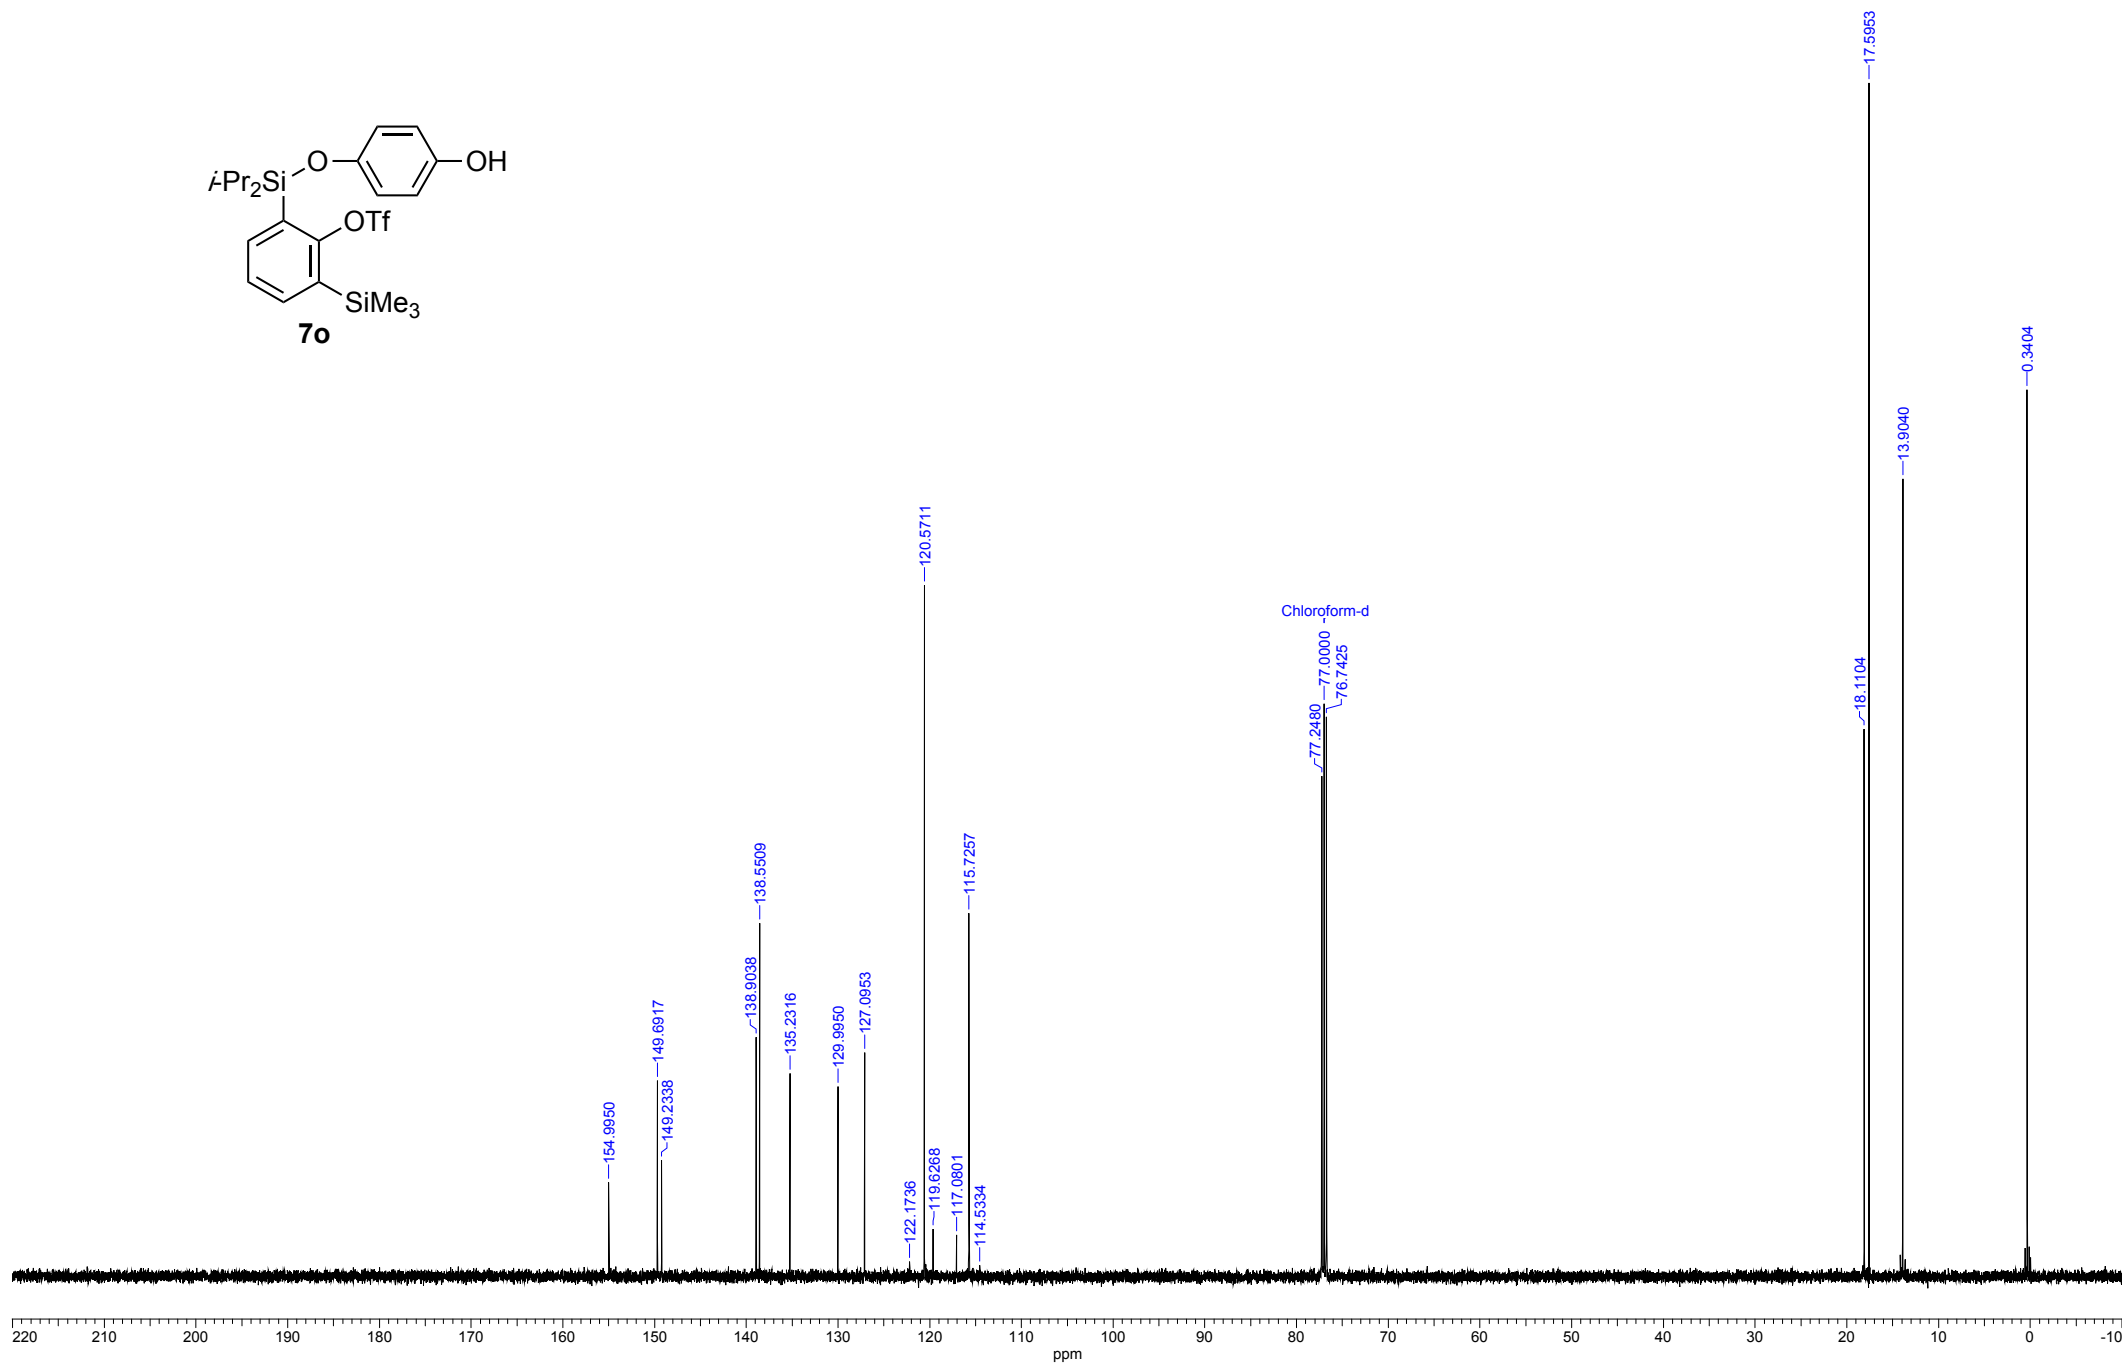

|                        |         |                        |                      |              |                                        |                 |                  |         |              |
|------------------------|---------|------------------------|----------------------|--------------|----------------------------------------|-----------------|------------------|---------|--------------|
| Acquisition Time (sec) | 3.4918  | Date                   | 24 Jun 2021 20:16:08 | File Name    | F:\NMR_CE_t_H\tawatari\TT0044-1H-1.als | Frequency (MHz) | 500.16           | Nucleus | 1H           |
| Number of Transients   | 8       | Original Points Count  | 26214                | Points Count | 26214                                  | Pulse Sequence  | single_pulse.ex2 | Solvent | CHLOROFORM-D |
| Sweep Width (Hz)       | 7507.39 | Temperature (degree C) | 22.200               |              |                                        |                 |                  |         |              |

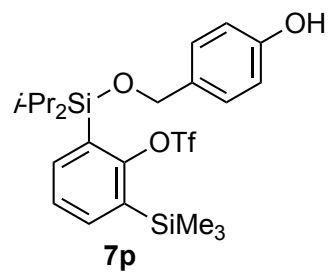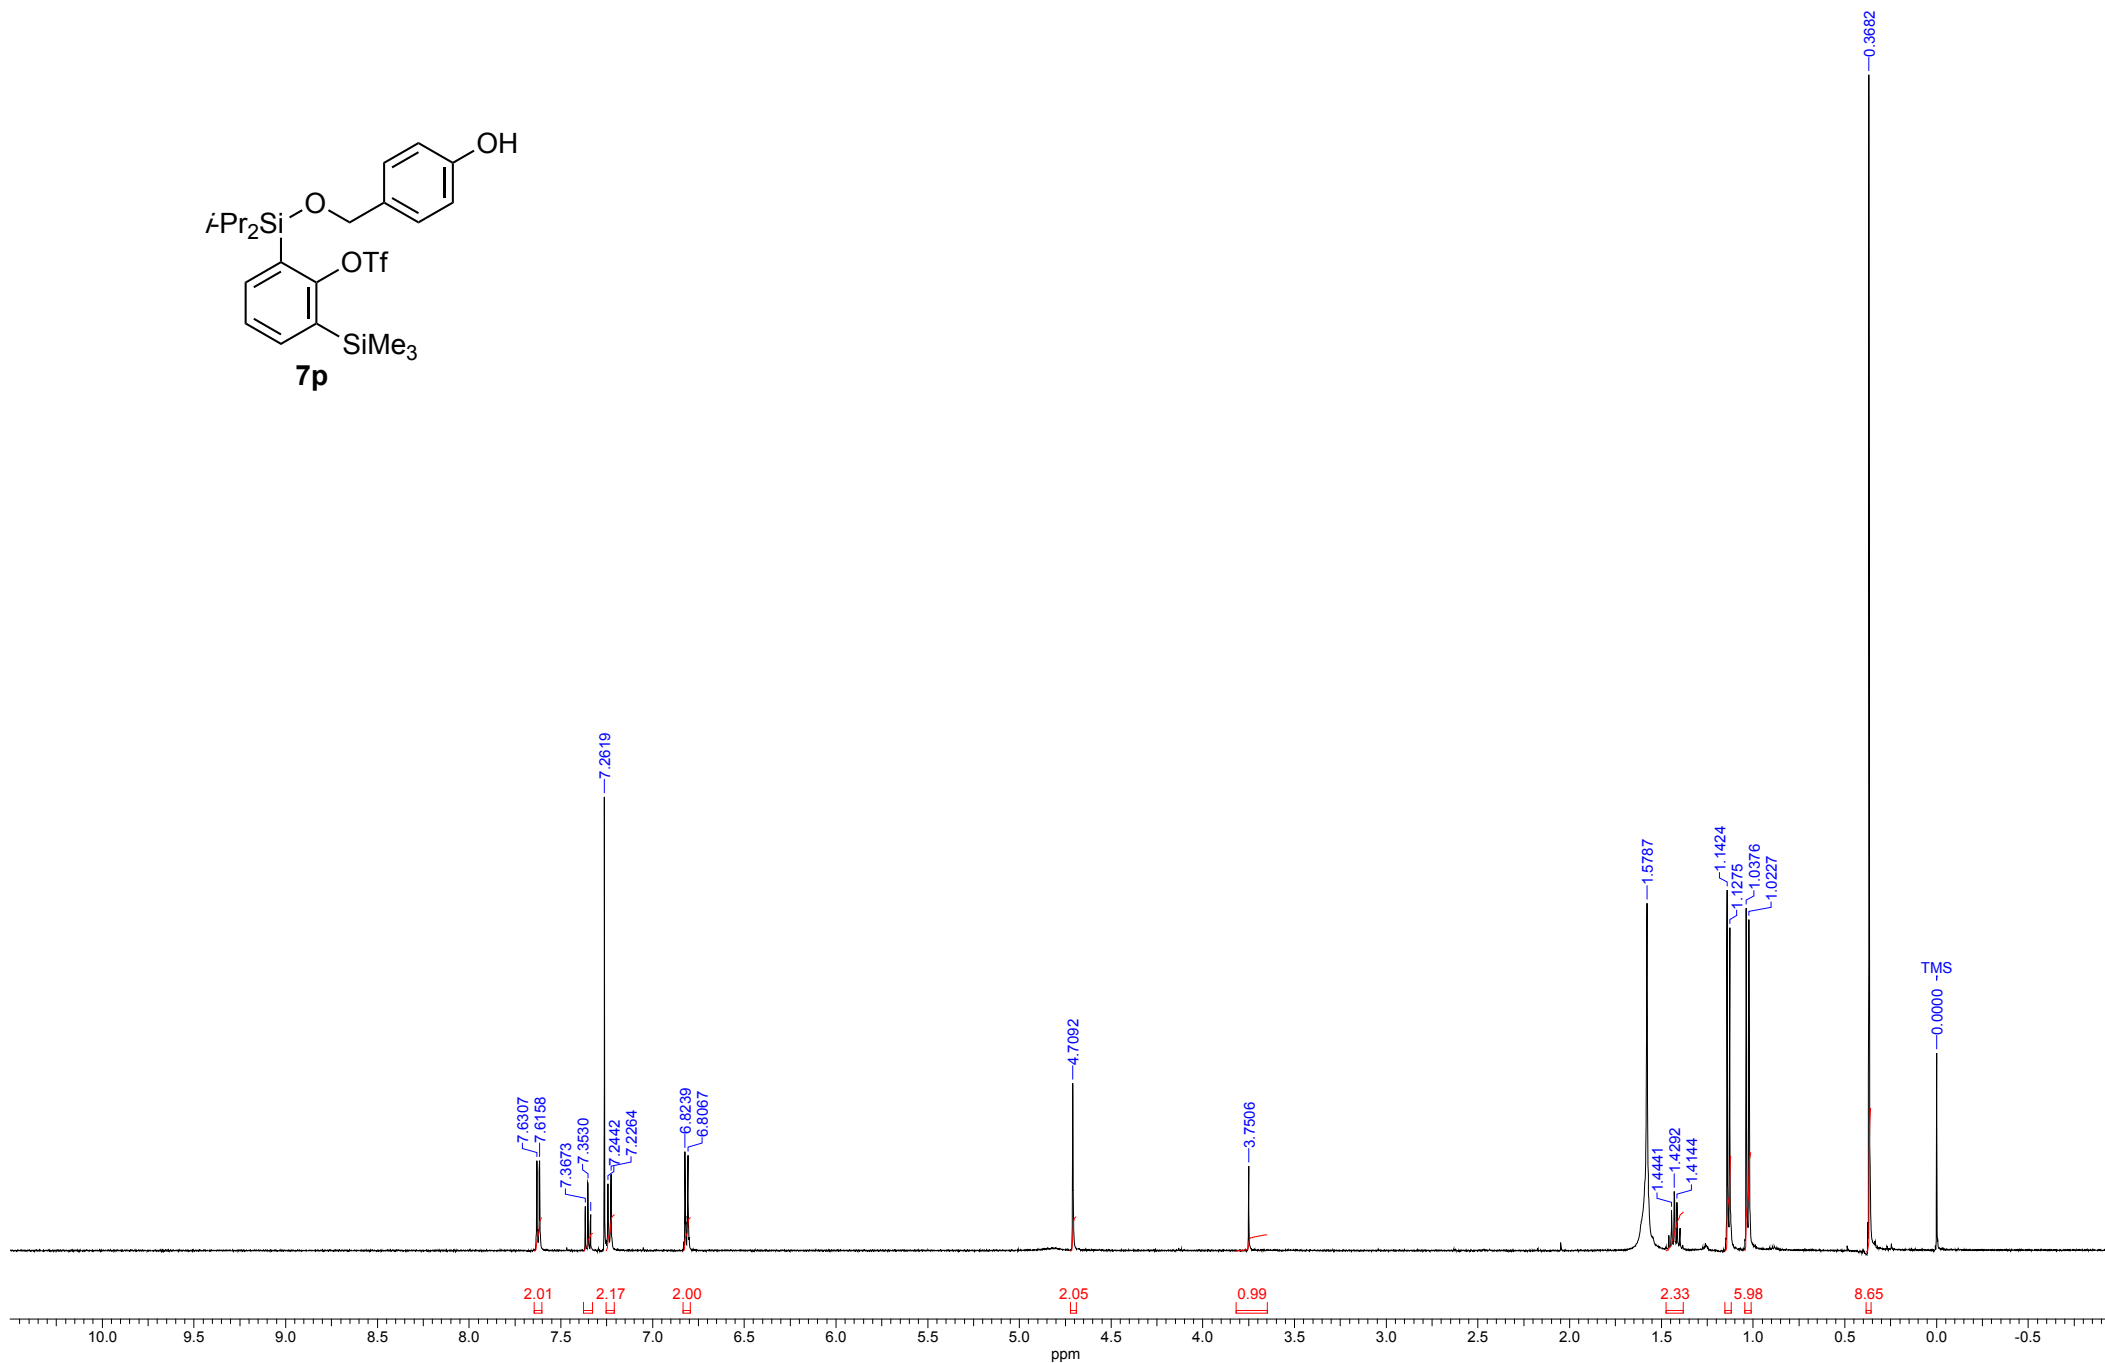

|                        |          |                        |                                  |                       |                      |              |                                                 |
|------------------------|----------|------------------------|----------------------------------|-----------------------|----------------------|--------------|-------------------------------------------------|
| Acquisition Time (sec) | 0.6921   | Comment                | single pulse decoupled gated NOE | Date                  | 07 Jul 2020 13:56:48 | File Name    | F:\NMR_CE t H \tawatani\TT0044-13C carbon-1.als |
| Frequency (MHz)        | 150.00   | Number of Transients   | 333                              | Original Points Count | 26214                | Points Count | 26214                                           |
| Sweep Width (Hz)       | 37876.77 | Temperature (degree C) | 21.200                           | Pulse Sequence        | carbon_cool.jxp      | Solvent      | CHLOROFORM-D                                    |

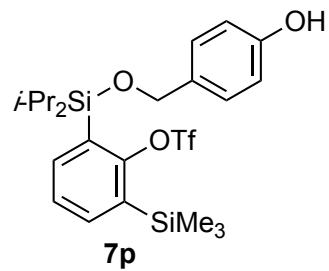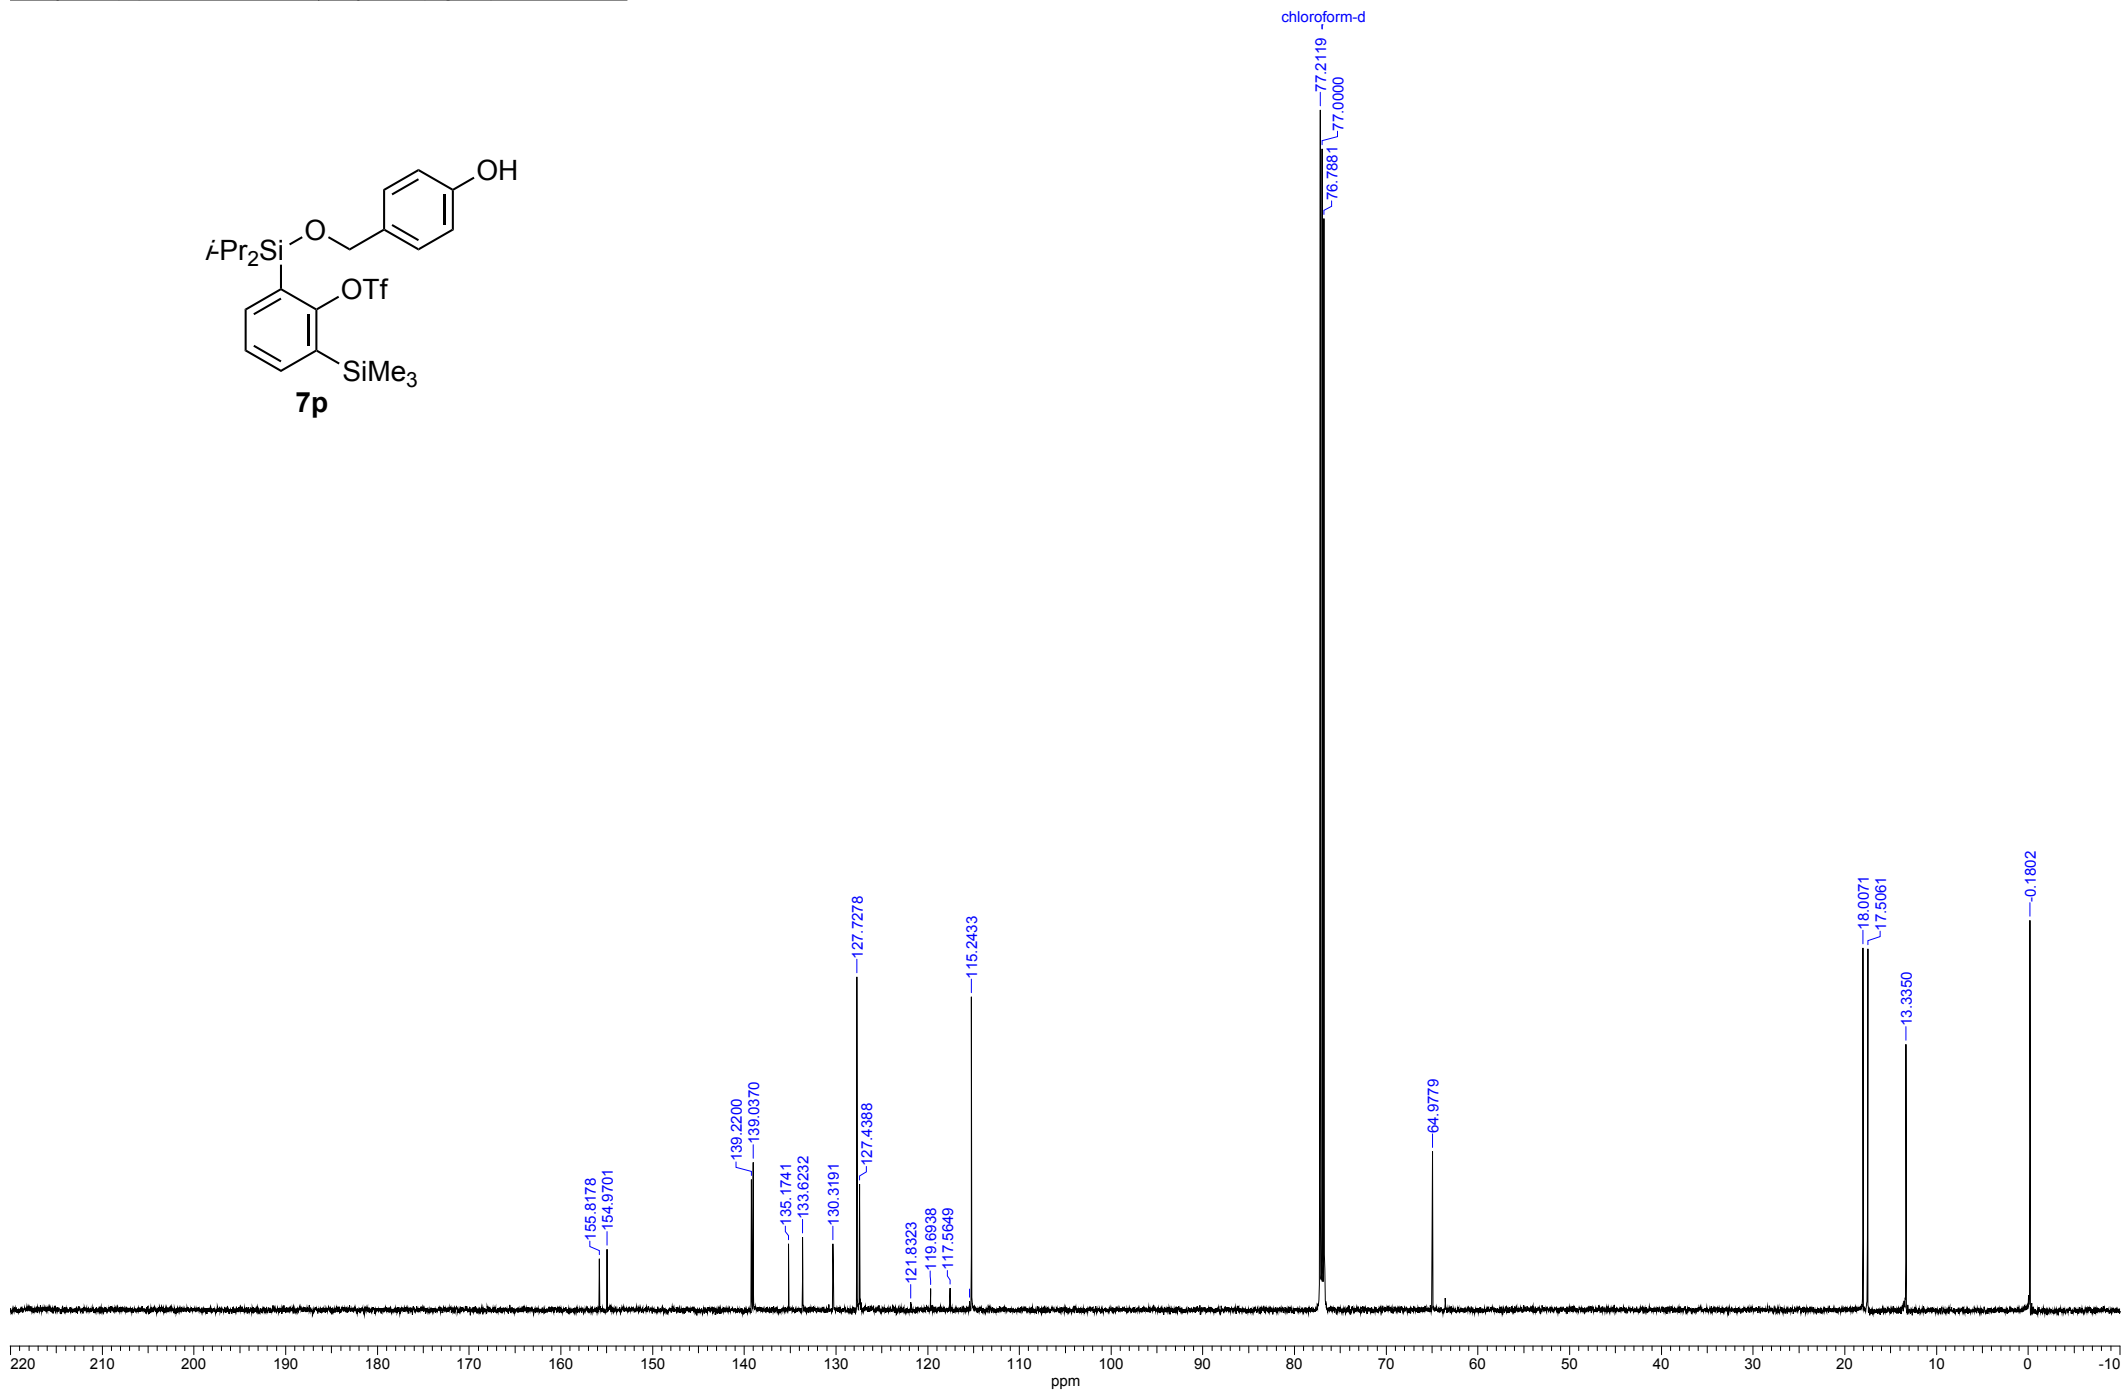

|                        |         |                        |                      |              |                                       |                 |                  |         |              |
|------------------------|---------|------------------------|----------------------|--------------|---------------------------------------|-----------------|------------------|---------|--------------|
| Acquisition Time (sec) | 3.4918  | Date                   | 27 Jun 2020 14:02:52 | File Name    | F:\NMR_CE_t_H\tawatar\TT0479-1H-1.als | Frequency (MHz) | 500.16           | Nucleus | 1H           |
| Number of Transients   | 8       | Original Points Count  | 26214                | Points Count | 26214                                 | Pulse Sequence  | single_pulse.ex2 | Solvent | CHLOROFORM-D |
| Sweep Width (Hz)       | 7507.39 | Temperature (degree C) | 22.400               |              |                                       |                 |                  |         |              |

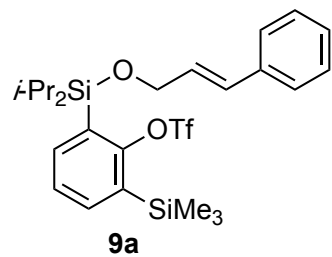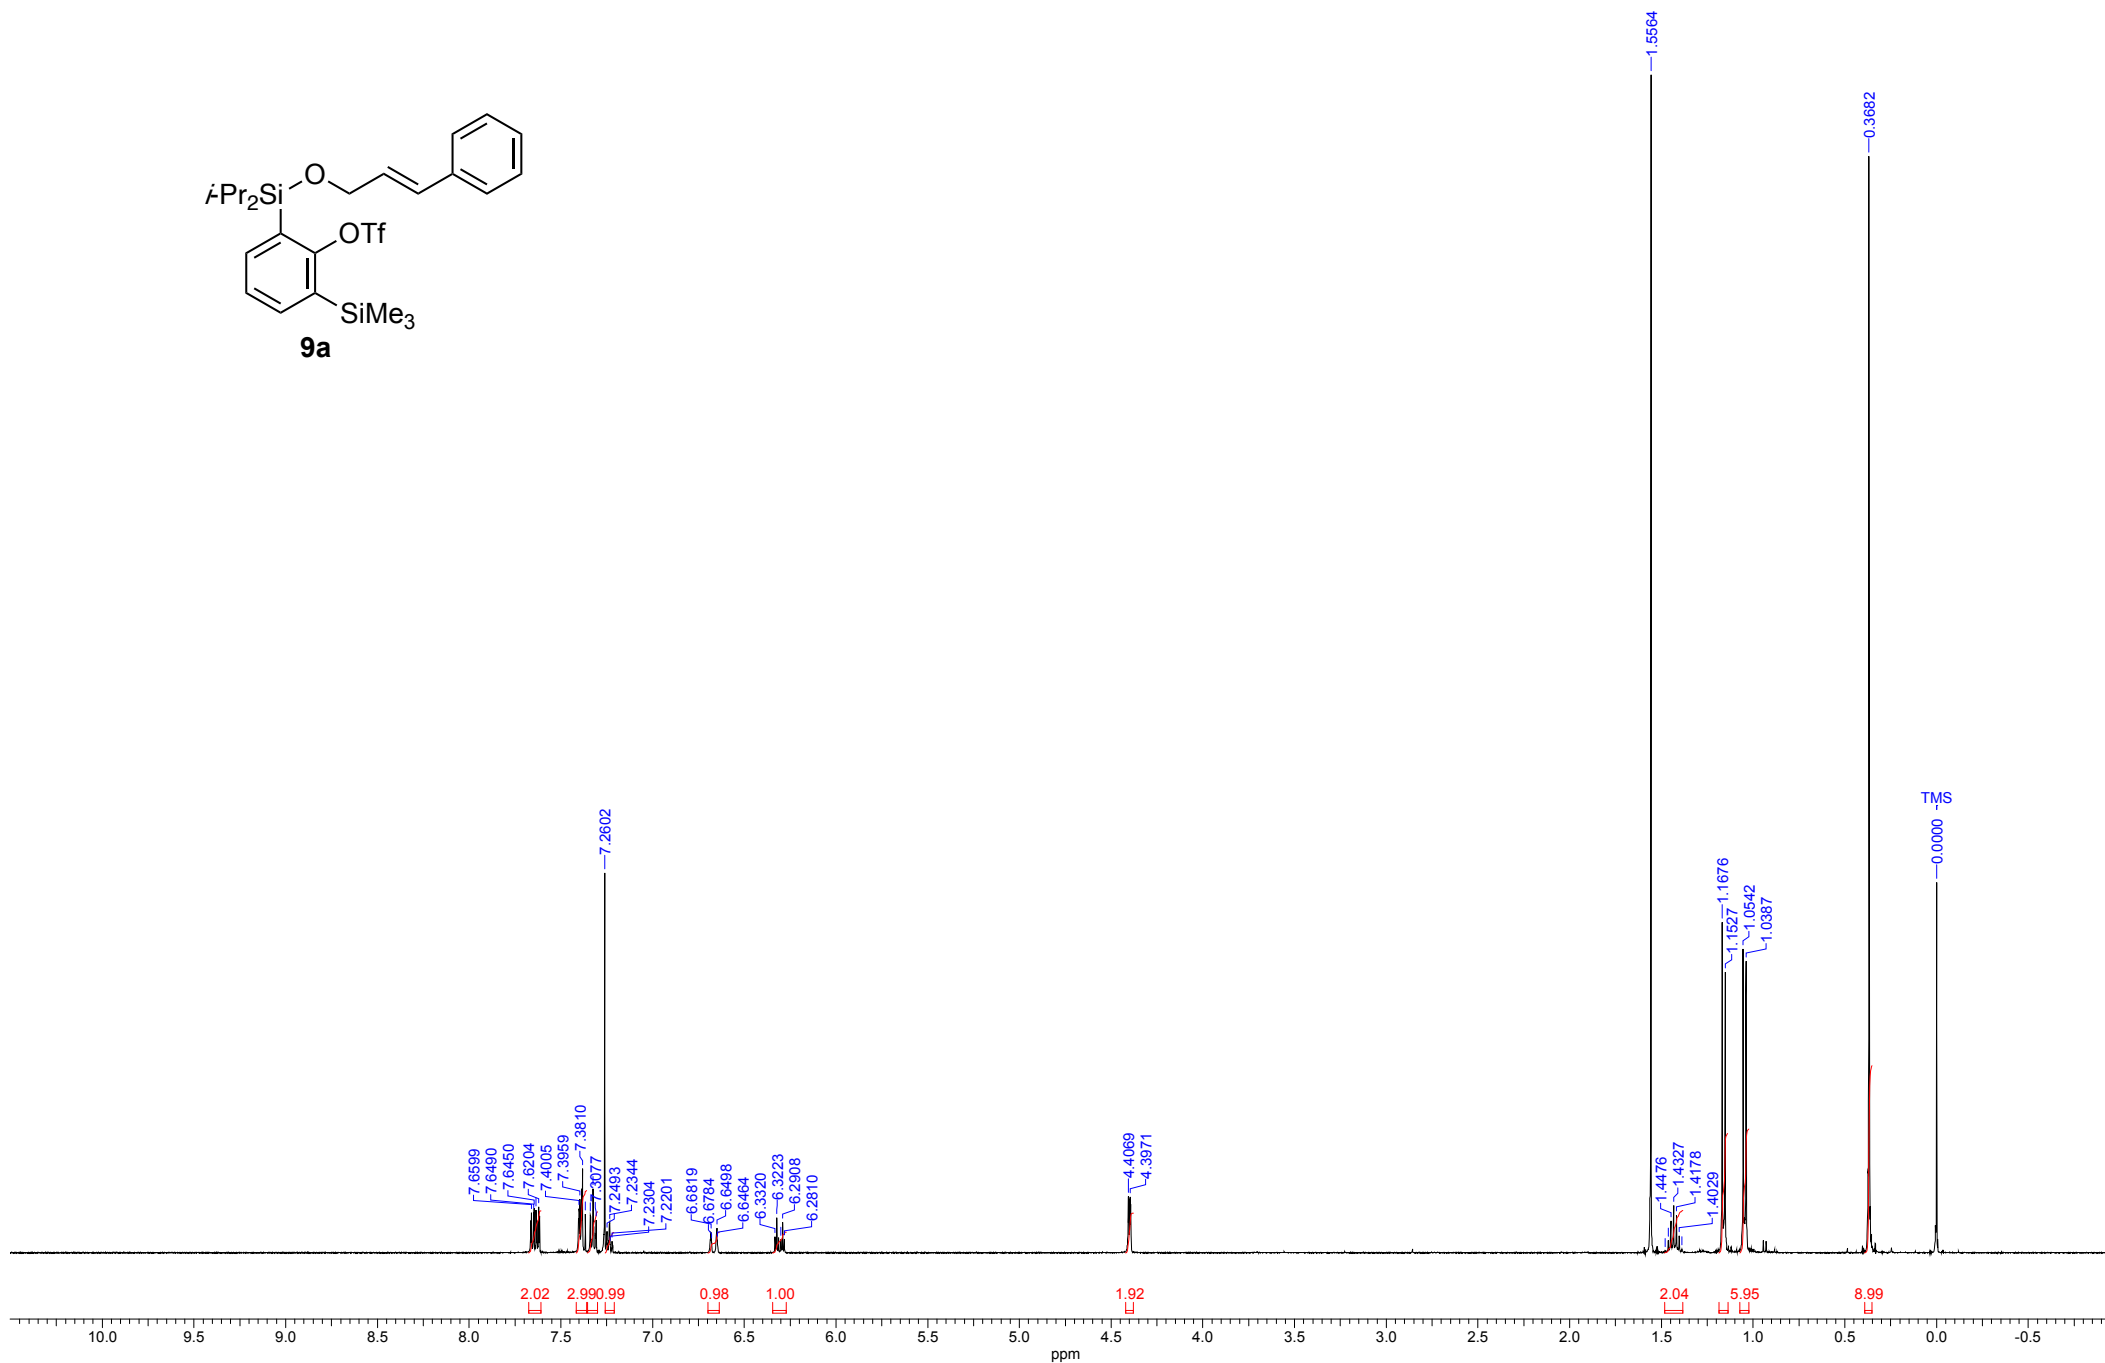



|                        |          |                        |                      |              |                                        |                 |                  |         |              |
|------------------------|----------|------------------------|----------------------|--------------|----------------------------------------|-----------------|------------------|---------|--------------|
| Acquisition Time (sec) | 0.8336   | Date                   | 27 Jun 2020 14:03:06 | File Name    | F:\NMR_CE_t_H\tawatar\TT0479-13C-1.als | Frequency (MHz) | 125.77           | Nucleus | 13C          |
| Number of Transients   | 256      | Original Points Count  | 26214                | Points Count | 26214                                  | Pulse Sequence  | single_pulse_dec | Solvent | CHLOROFORM-D |
| Sweep Width (Hz)       | 31446.06 | Temperature (degree C) | 22.900               |              |                                        |                 |                  |         |              |

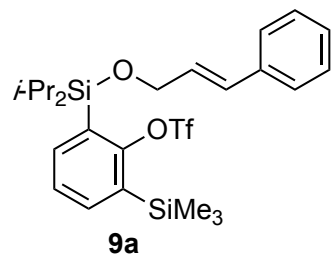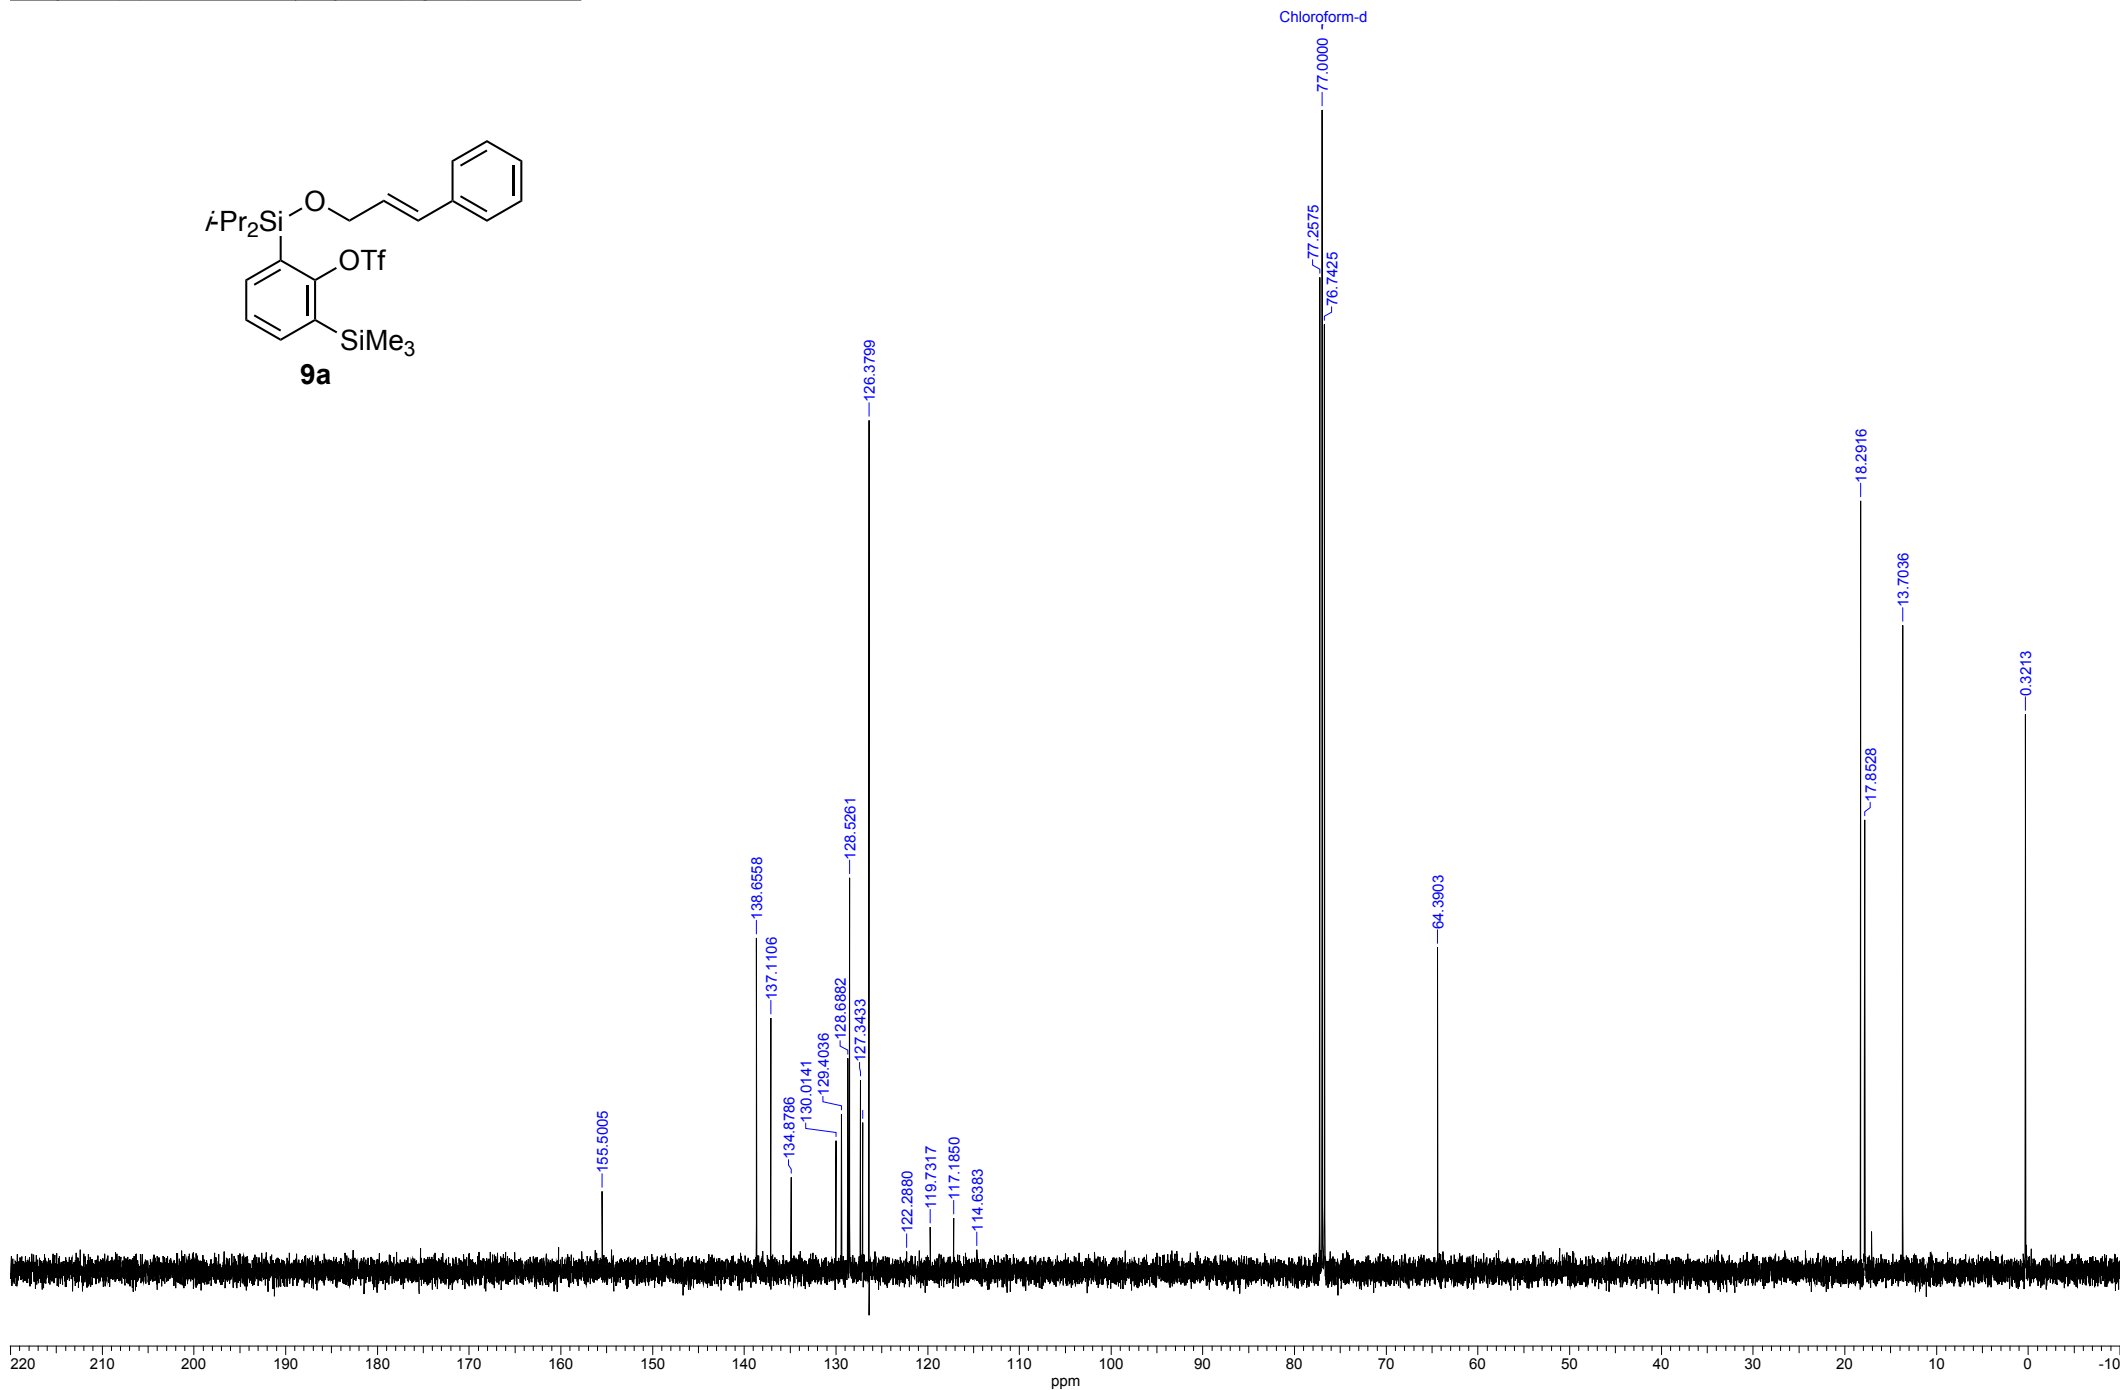

|                        |         |                        |              |                      |                      |                       |                                                  |              |
|------------------------|---------|------------------------|--------------|----------------------|----------------------|-----------------------|--------------------------------------------------|--------------|
| Acquisition Time (sec) | 1.8153  | Comment                | single pulse | Date                 | 14 Jan 2021 15:19:58 | File Name             | F:\NMR CE t H \tawatari\TT0685-1H_proton-1-1.als |              |
| Frequency (MHz)        | 600.17  | Nucleus                | 1H           | Number of Transients | 8                    | Original Points Count | 16384                                            |              |
| Sweep Width (Hz)       | 9025.27 | Temperature (degree C) | 18.400       | Points Count         | 13120                | Pulse Sequence        | proton.jxp                                       |              |
|                        |         |                        |              |                      |                      |                       | Solvent                                          | CHLOROFORM-D |

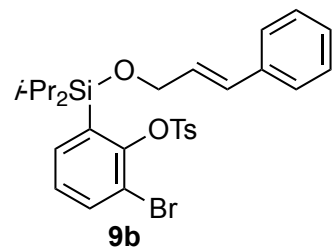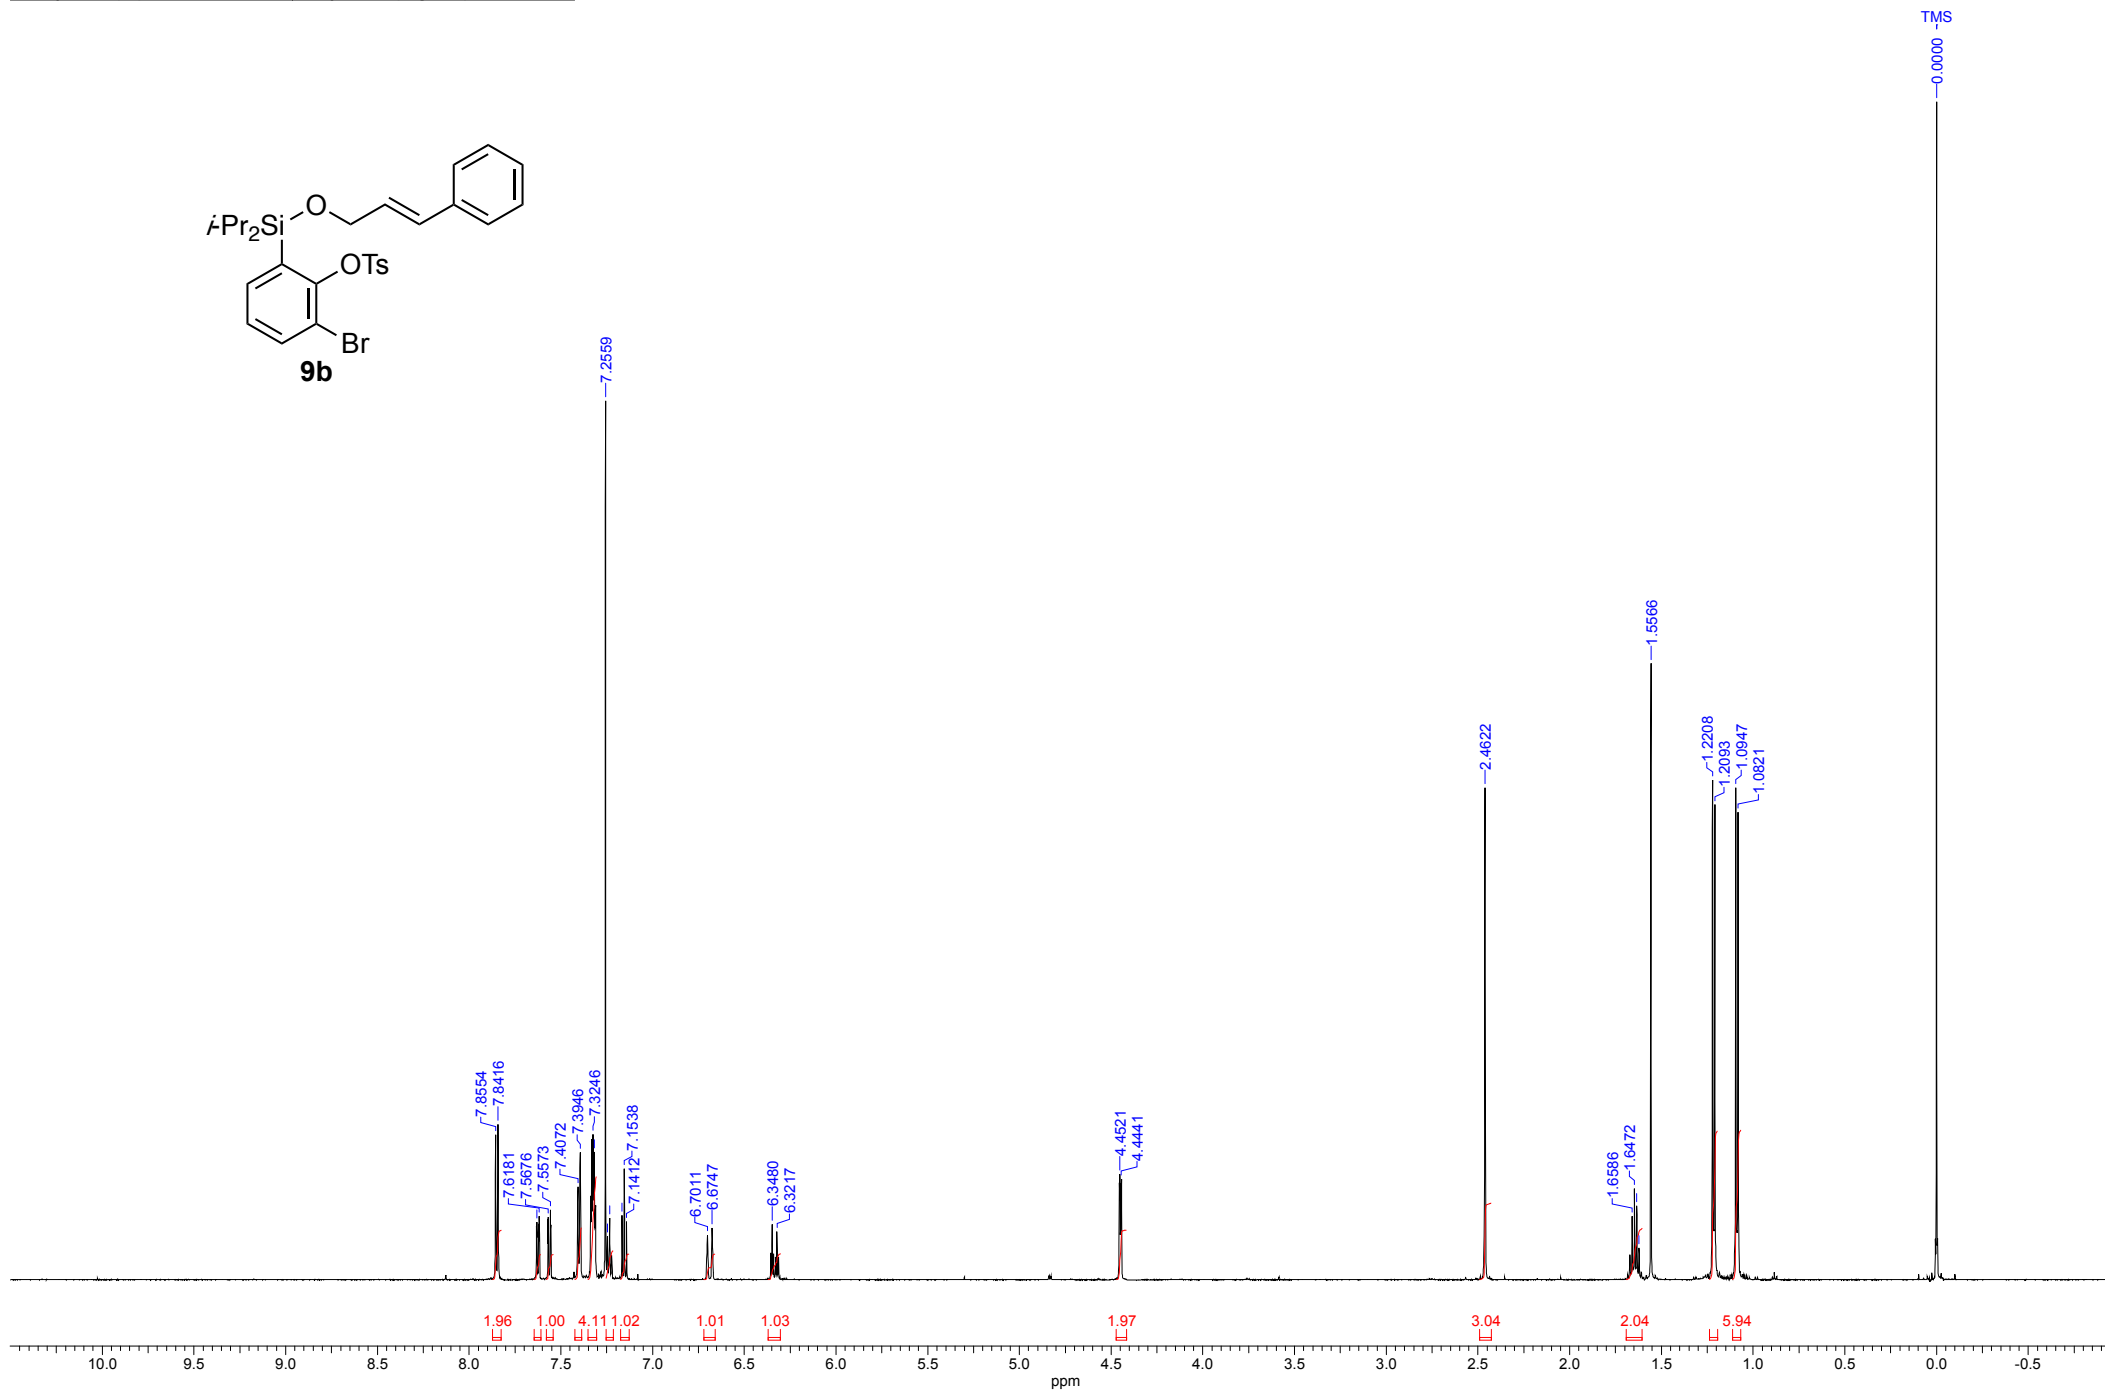

|                        |          |                        |                                  |                       |                      |                |                                                |
|------------------------|----------|------------------------|----------------------------------|-----------------------|----------------------|----------------|------------------------------------------------|
| Acquisition Time (sec) | 0.6921   | Comment                | single pulse decoupled gated NOE | Date                  | 14 Jan 2021 15:19:28 | File Name      | F:\NMR CE t H \tawatari\T0685-13C carbon-1.als |
| Frequency (MHz)        | 150.00   | Number of Transients   | 256                              | Points Count          | 26214                | Pulse Sequence | carbon_cool.jxp                                |
| Sweep Width (Hz)       | 37876.77 | Temperature (degree C) | 18.600                           | Original Points Count | 26214                | Solvent        | CHLOROFORM-D                                   |

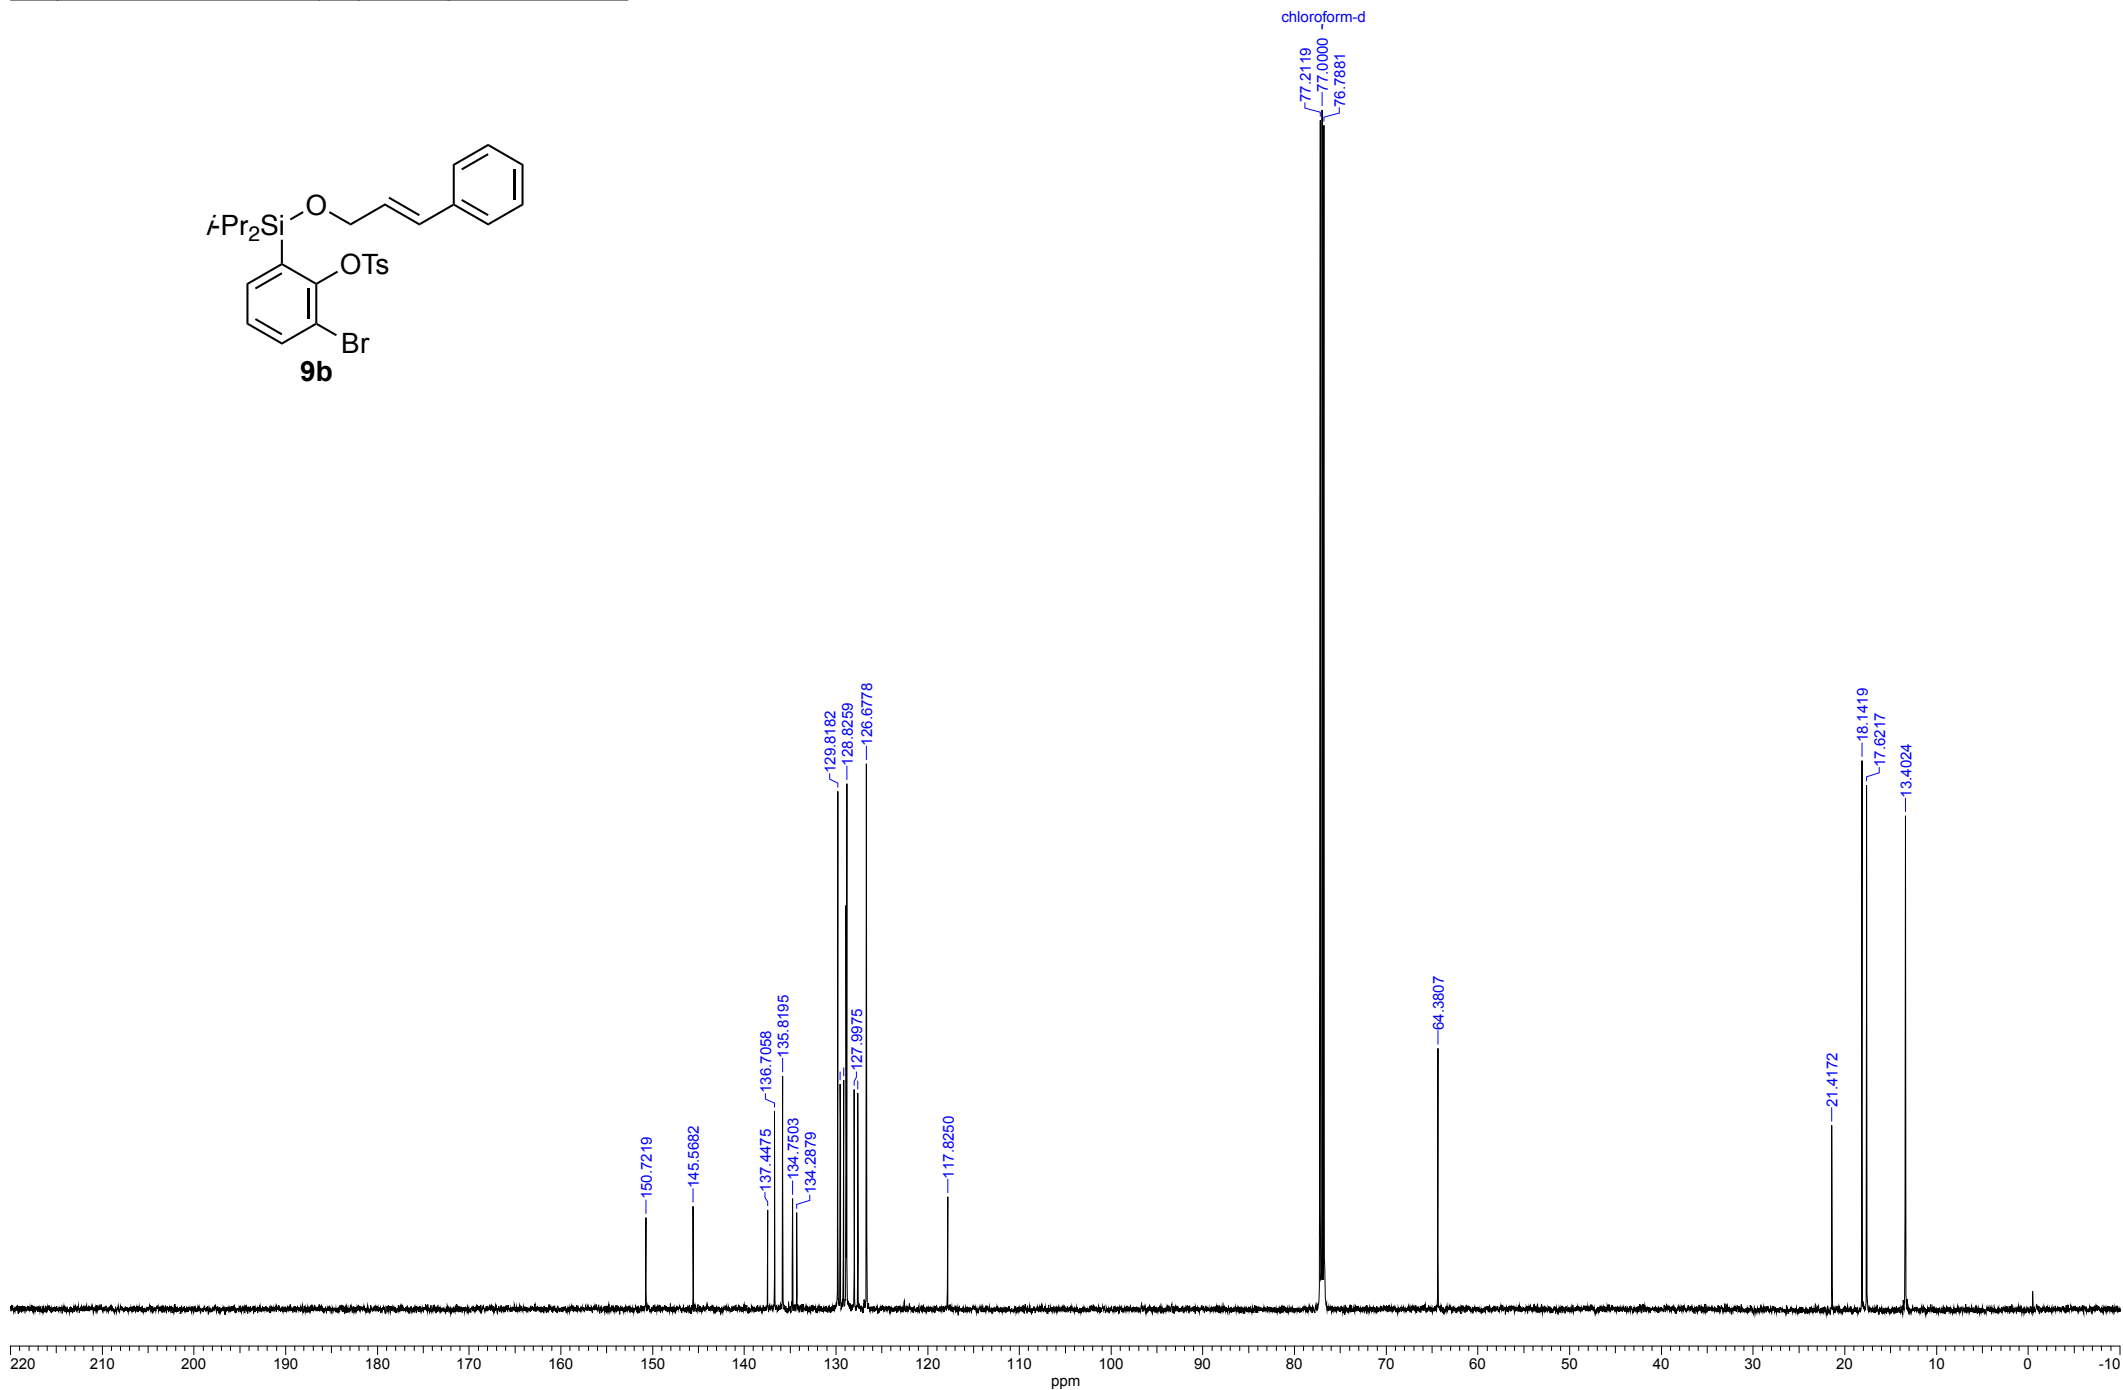

|                        |         |                        |                      |              |                                           |                 |                  |         |              |
|------------------------|---------|------------------------|----------------------|--------------|-------------------------------------------|-----------------|------------------|---------|--------------|
| Acquisition Time (sec) | 3.4918  | Date                   | 30 Jun 2020 22:12:30 | File Name    | F:\NMR_CE_t_H\tawatari\TT0484column-1.als | Frequency (MHz) | 500.16           | Nucleus | 1H           |
| Number of Transients   | 8       | Original Points Count  | 26214                | Points Count | 26214                                     | Pulse Sequence  | single_pulse.ex2 | Solvent | CHLOROFORM-D |
| Sweep Width (Hz)       | 7507.39 | Temperature (degree C) | 22.800               |              |                                           |                 |                  |         |              |

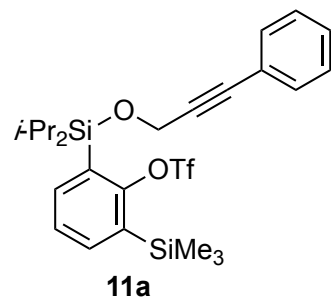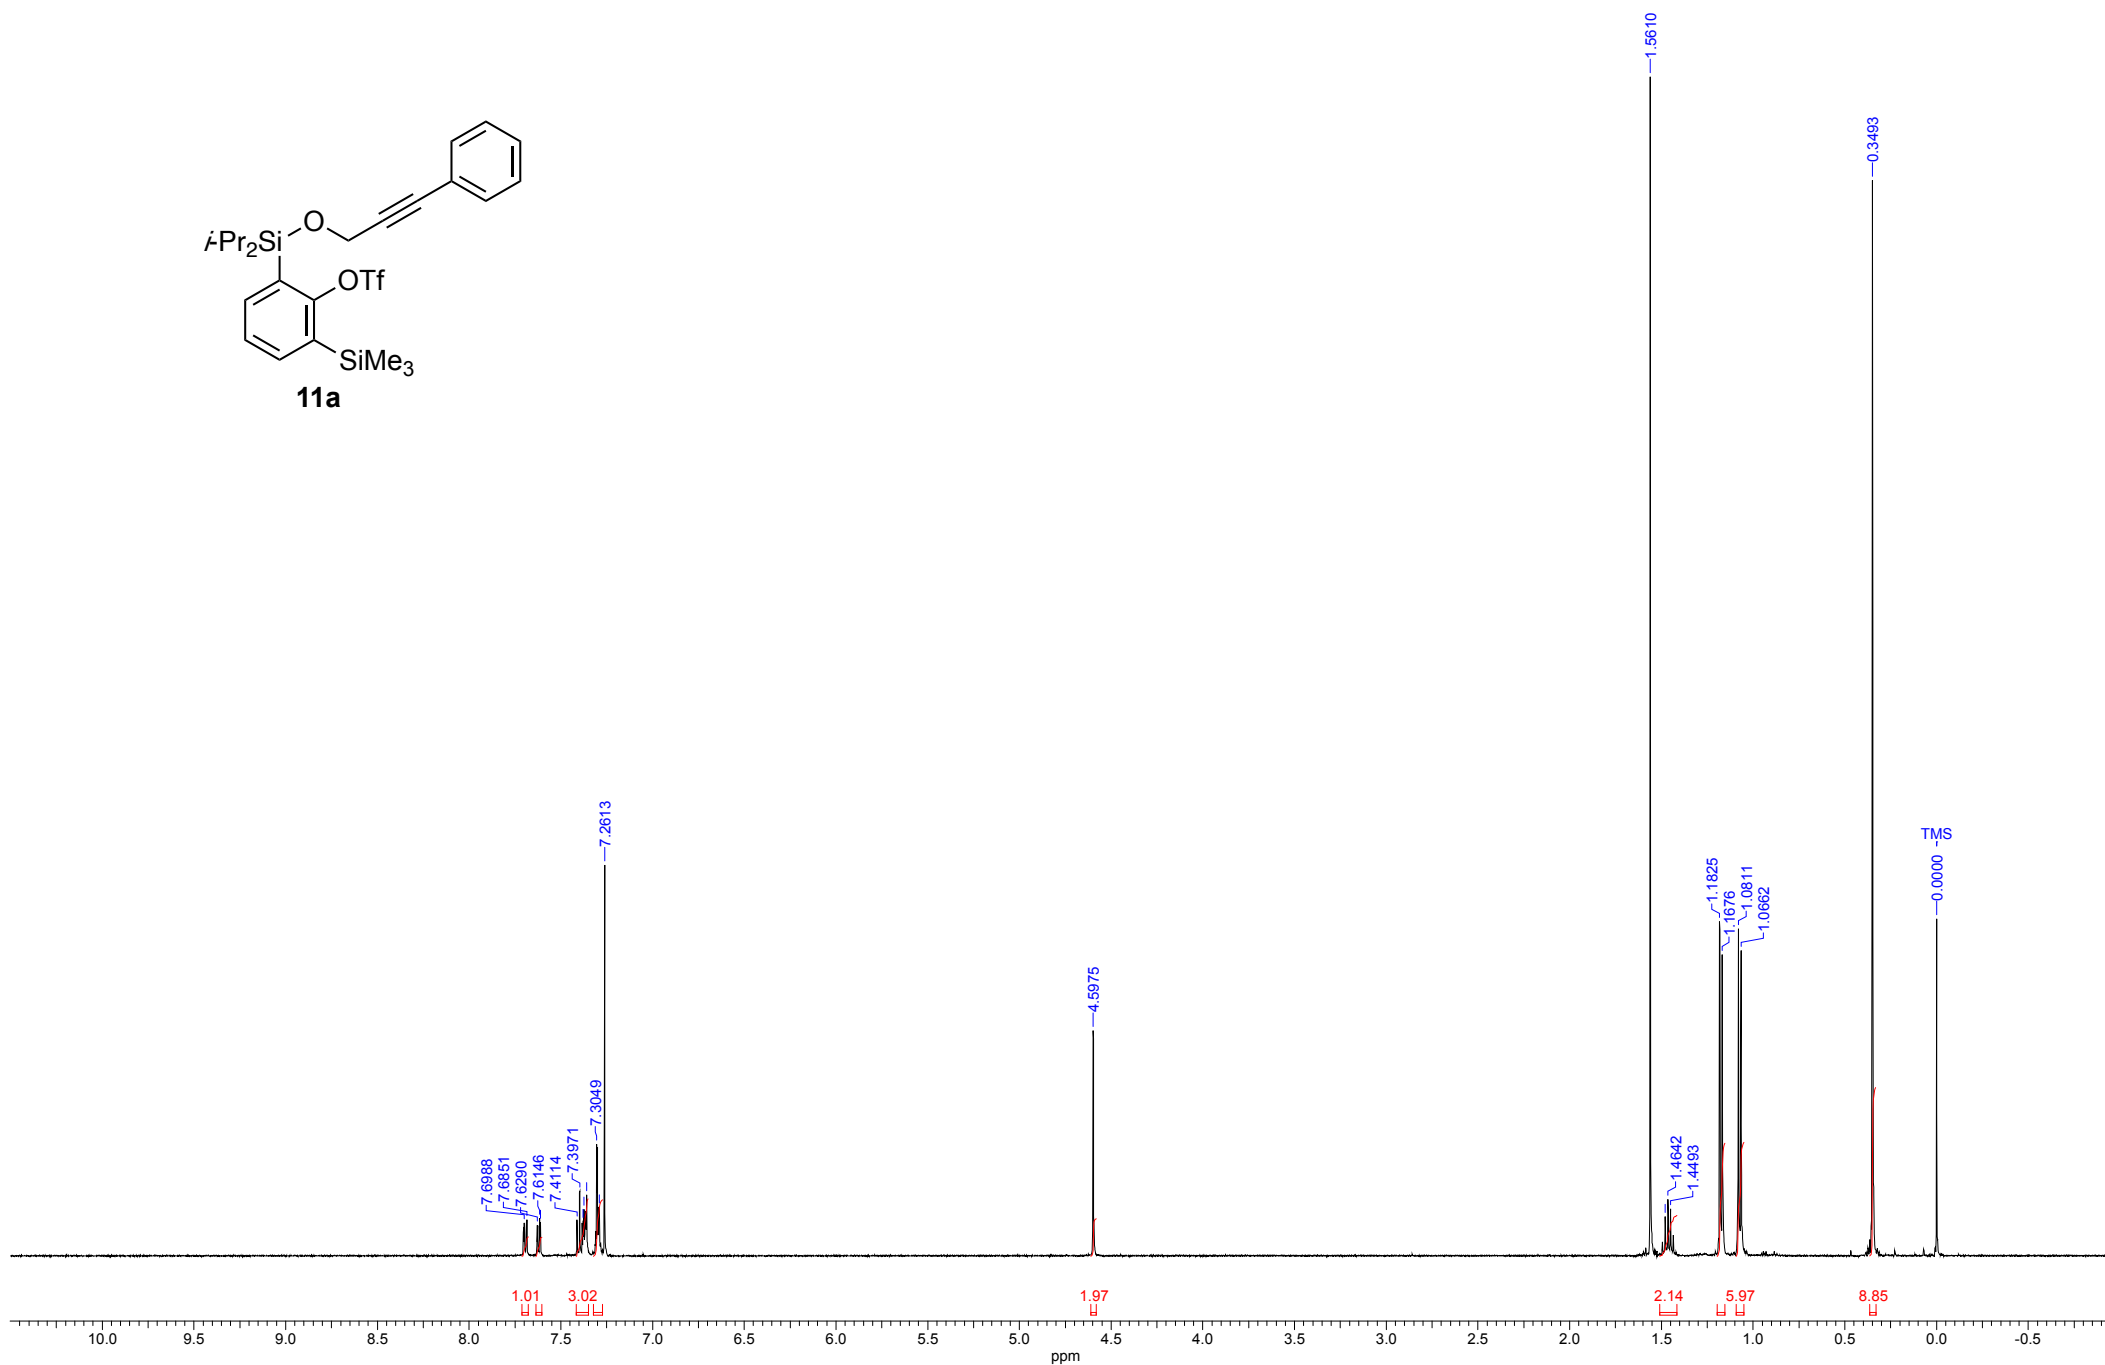

|                        |          |                        |                      |              |                                          |                 |                  |         |              |
|------------------------|----------|------------------------|----------------------|--------------|------------------------------------------|-----------------|------------------|---------|--------------|
| Acquisition Time (sec) | 0.8336   | Date                   | 30 Jun 2020 23:12:00 | File Name    | F:\NMR CE t H \tawarani\TT0484-13C-1.als | Frequency (MHz) | 125.77           | Nucleus | 13C          |
| Number of Transients   | 256      | Original Points Count  | 26214                | Points Count | 26214                                    | Pulse Sequence  | single_pulse_dec | Solvent | CHLOROFORM-D |
| Sweep Width (Hz)       | 31446.06 | Temperature (degree C) | 23.300               |              |                                          |                 |                  |         |              |

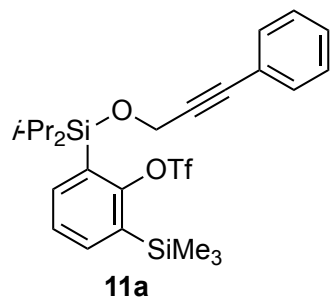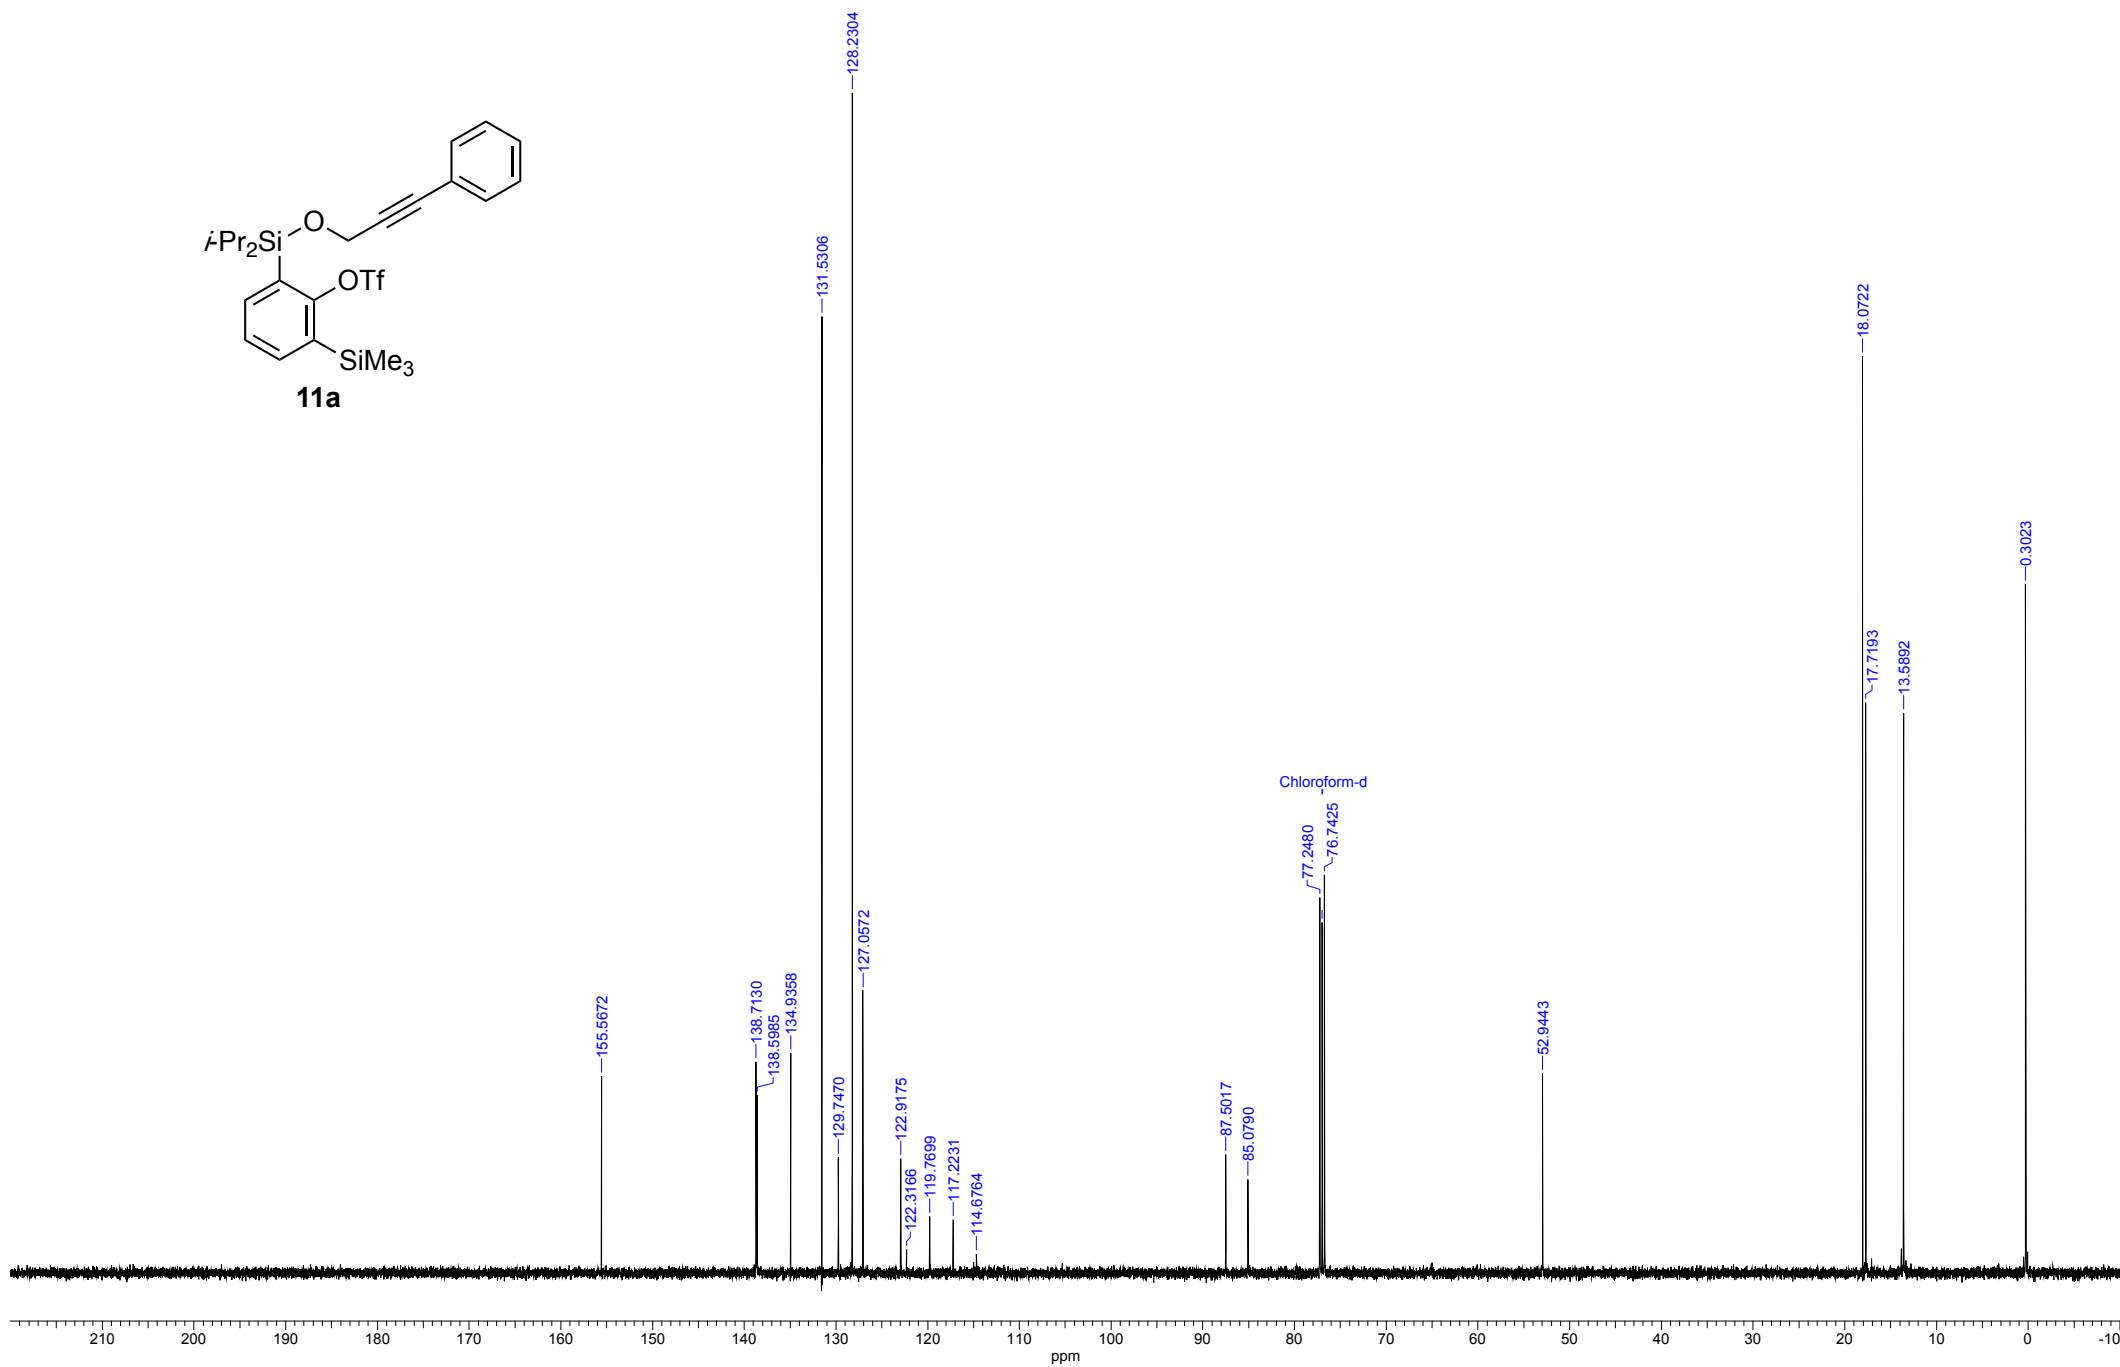

|                        |         |                        |              |                      |                      |                       |                                                  |              |
|------------------------|---------|------------------------|--------------|----------------------|----------------------|-----------------------|--------------------------------------------------|--------------|
| Acquisition Time (sec) | 1.8153  | Comment                | single pulse | Date                 | 17 Feb 2021 13:59:44 | File Name             | F:\NMR CE t H \tawatari\TT0714-1H_proton-1-1.als |              |
| Frequency (MHz)        | 600.17  | Nucleus                | 1H           | Number of Transients | 8                    | Original Points Count | 16384                                            |              |
| Sweep Width (Hz)       | 9025.27 | Temperature (degree C) | 20.900       | Points Count         | 13120                | Pulse Sequence        | proton.jxp                                       |              |
|                        |         |                        |              |                      |                      |                       | Solvent                                          | CHLOROFORM-D |

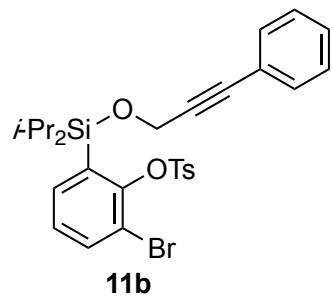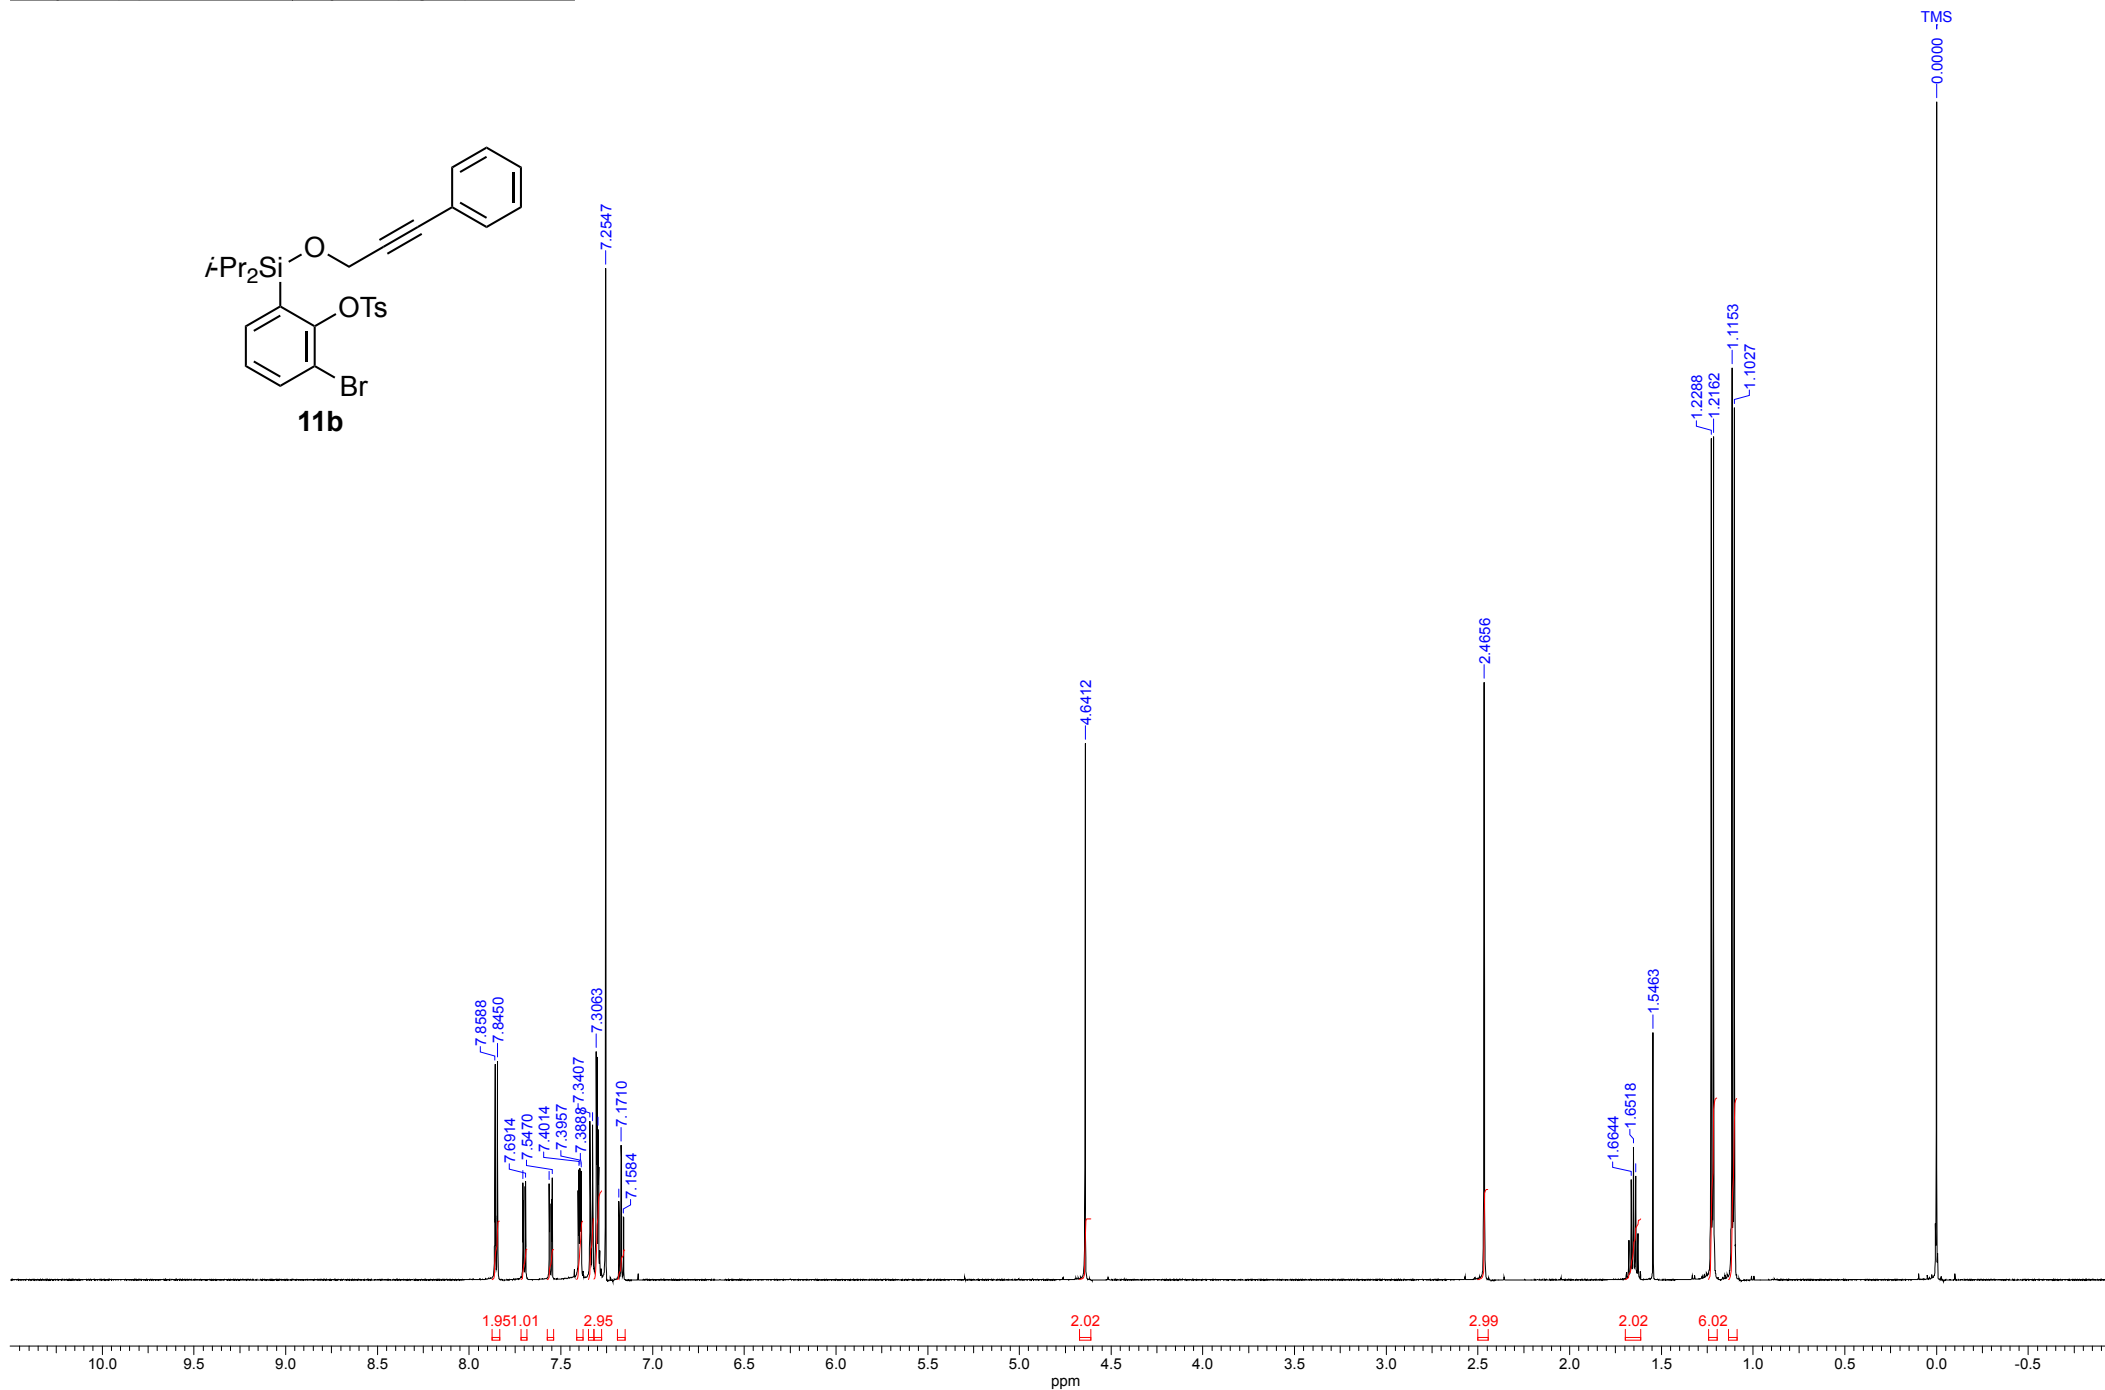

|                        |          |                        |                                  |              |                      |                |                                                 |
|------------------------|----------|------------------------|----------------------------------|--------------|----------------------|----------------|-------------------------------------------------|
| Acquisition Time (sec) | 0.6921   | Comment                | single pulse decoupled gated NOE | Date         | 17 Feb 2021 13:59:24 | File Name      | F:\NMR CE t H \tawatari\TT0714-13C carbon-1.als |
| Frequency (MHz)        | 150.00   | Number of Transients   | 256                              | Points Count | 26214                | Pulse Sequence | carbon_cool.jxp                                 |
| Sweep Width (Hz)       | 37876.77 | Temperature (degree C) | 21.000                           |              |                      | Solvent        | CHLOROFORM-D                                    |

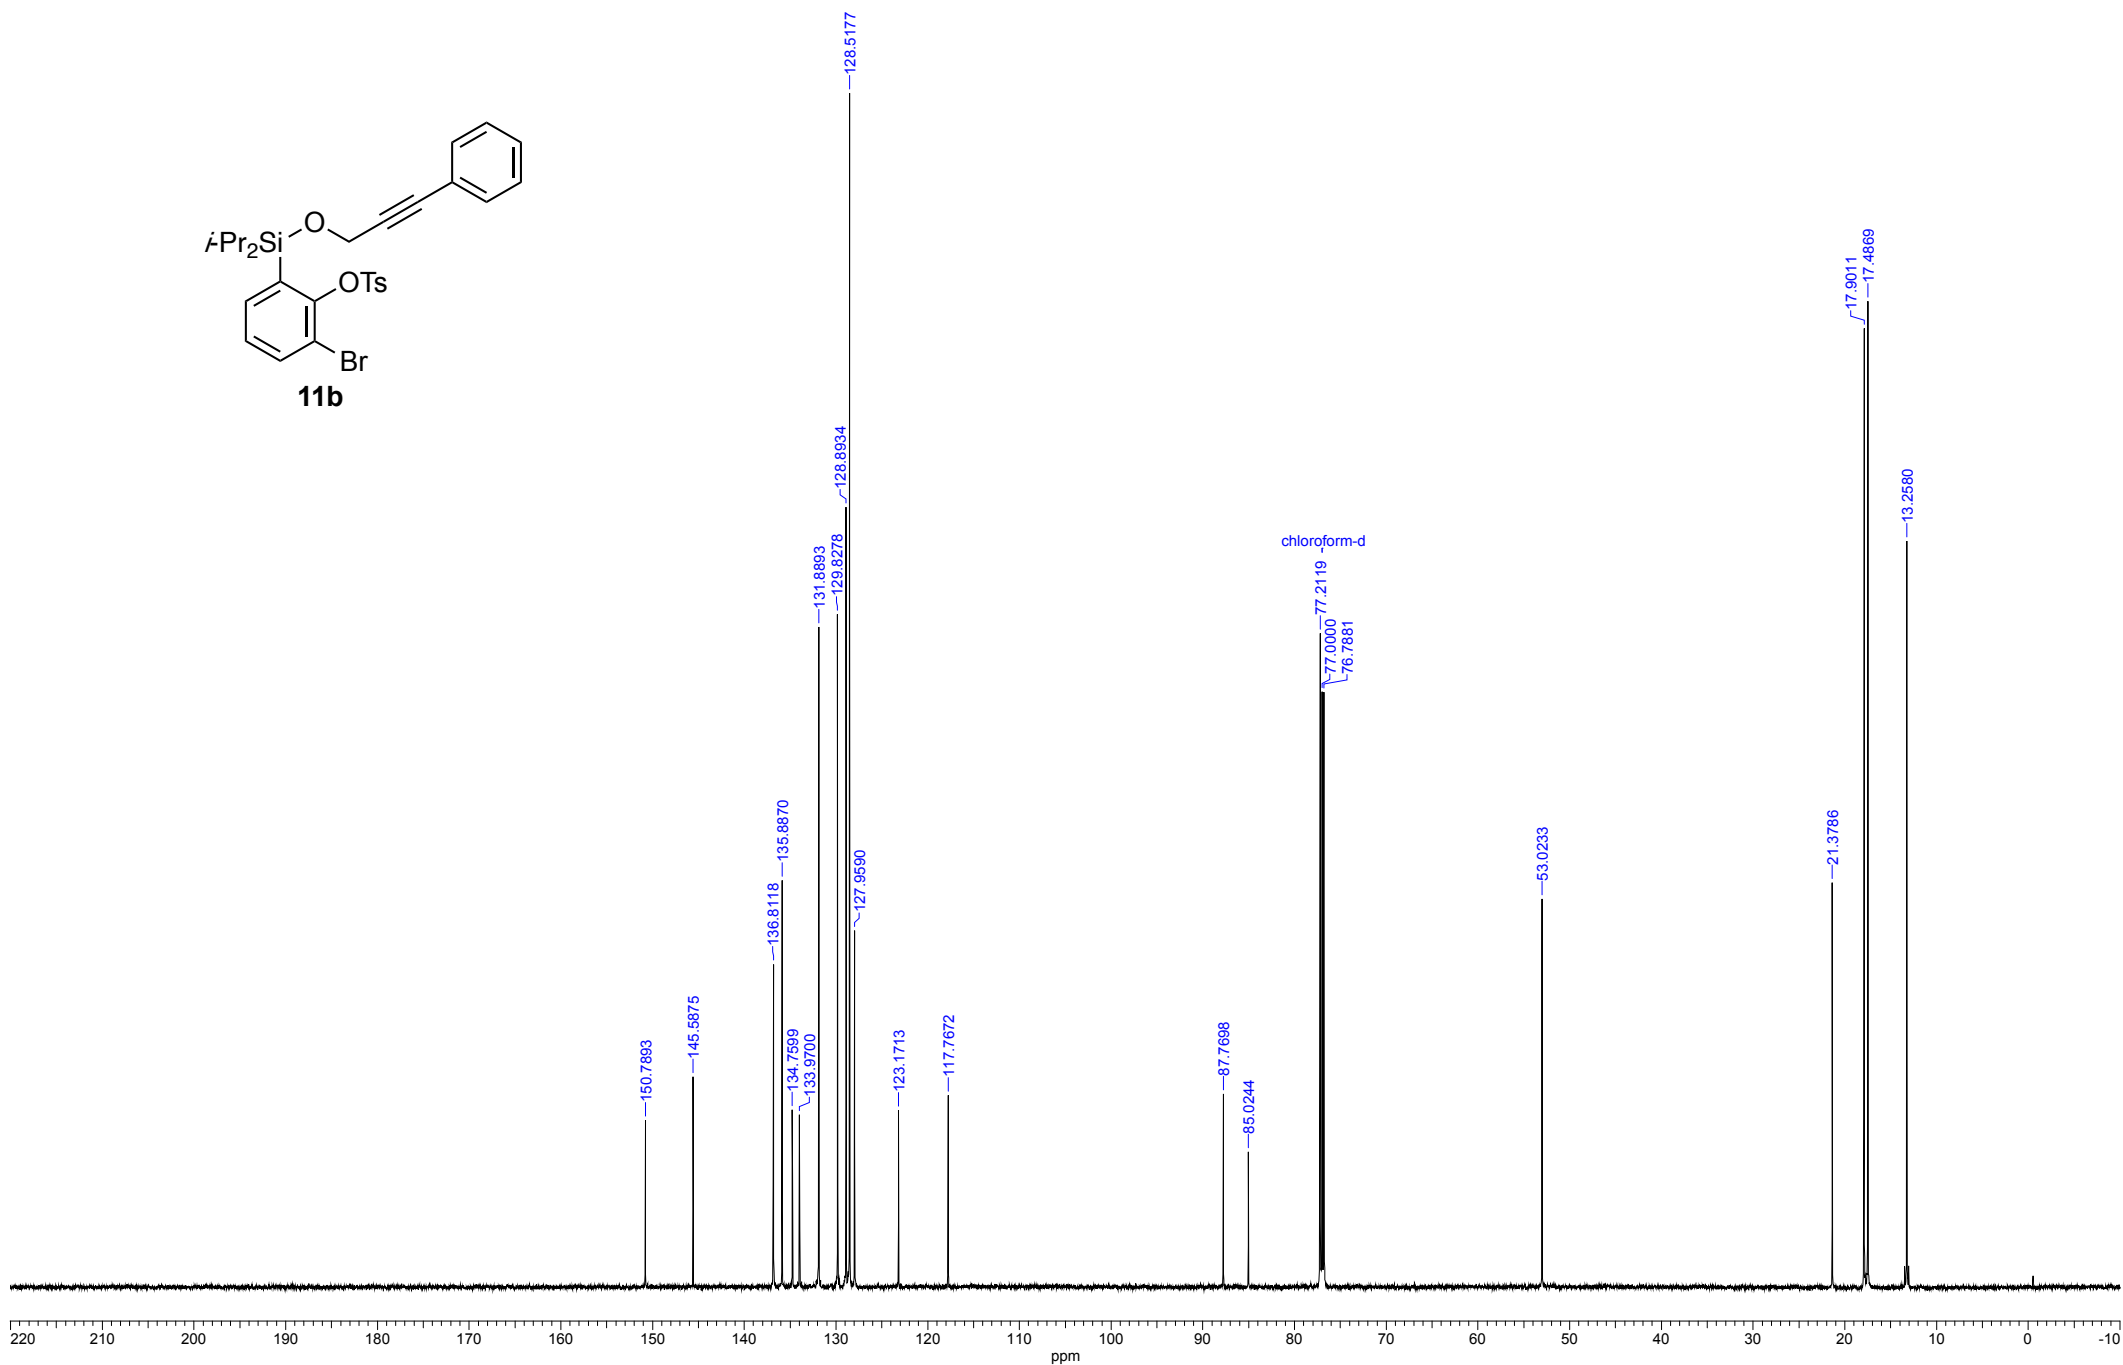

|                        |         |                        |              |                      |                      |                       |                                                  |              |
|------------------------|---------|------------------------|--------------|----------------------|----------------------|-----------------------|--------------------------------------------------|--------------|
| Acquisition Time (sec) | 1.8153  | Comment                | single pulse | Date                 | 10 Mar 2021 19:14:24 | File Name             | F:\NMR CE t H \tawatari\TT0746-1H_proton-1-1.als |              |
| Frequency (MHz)        | 600.17  | Nucleus                | 1H           | Number of Transients | 8                    | Original Points Count | 16384                                            |              |
| Sweep Width (Hz)       | 9025.27 | Temperature (degree C) | 20.700       | Points Count         | 13120                | Pulse Sequence        | proton.jxp                                       |              |
|                        |         |                        |              |                      |                      |                       | Solvent                                          | CHLOROFORM-D |

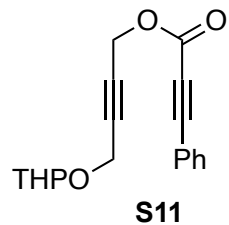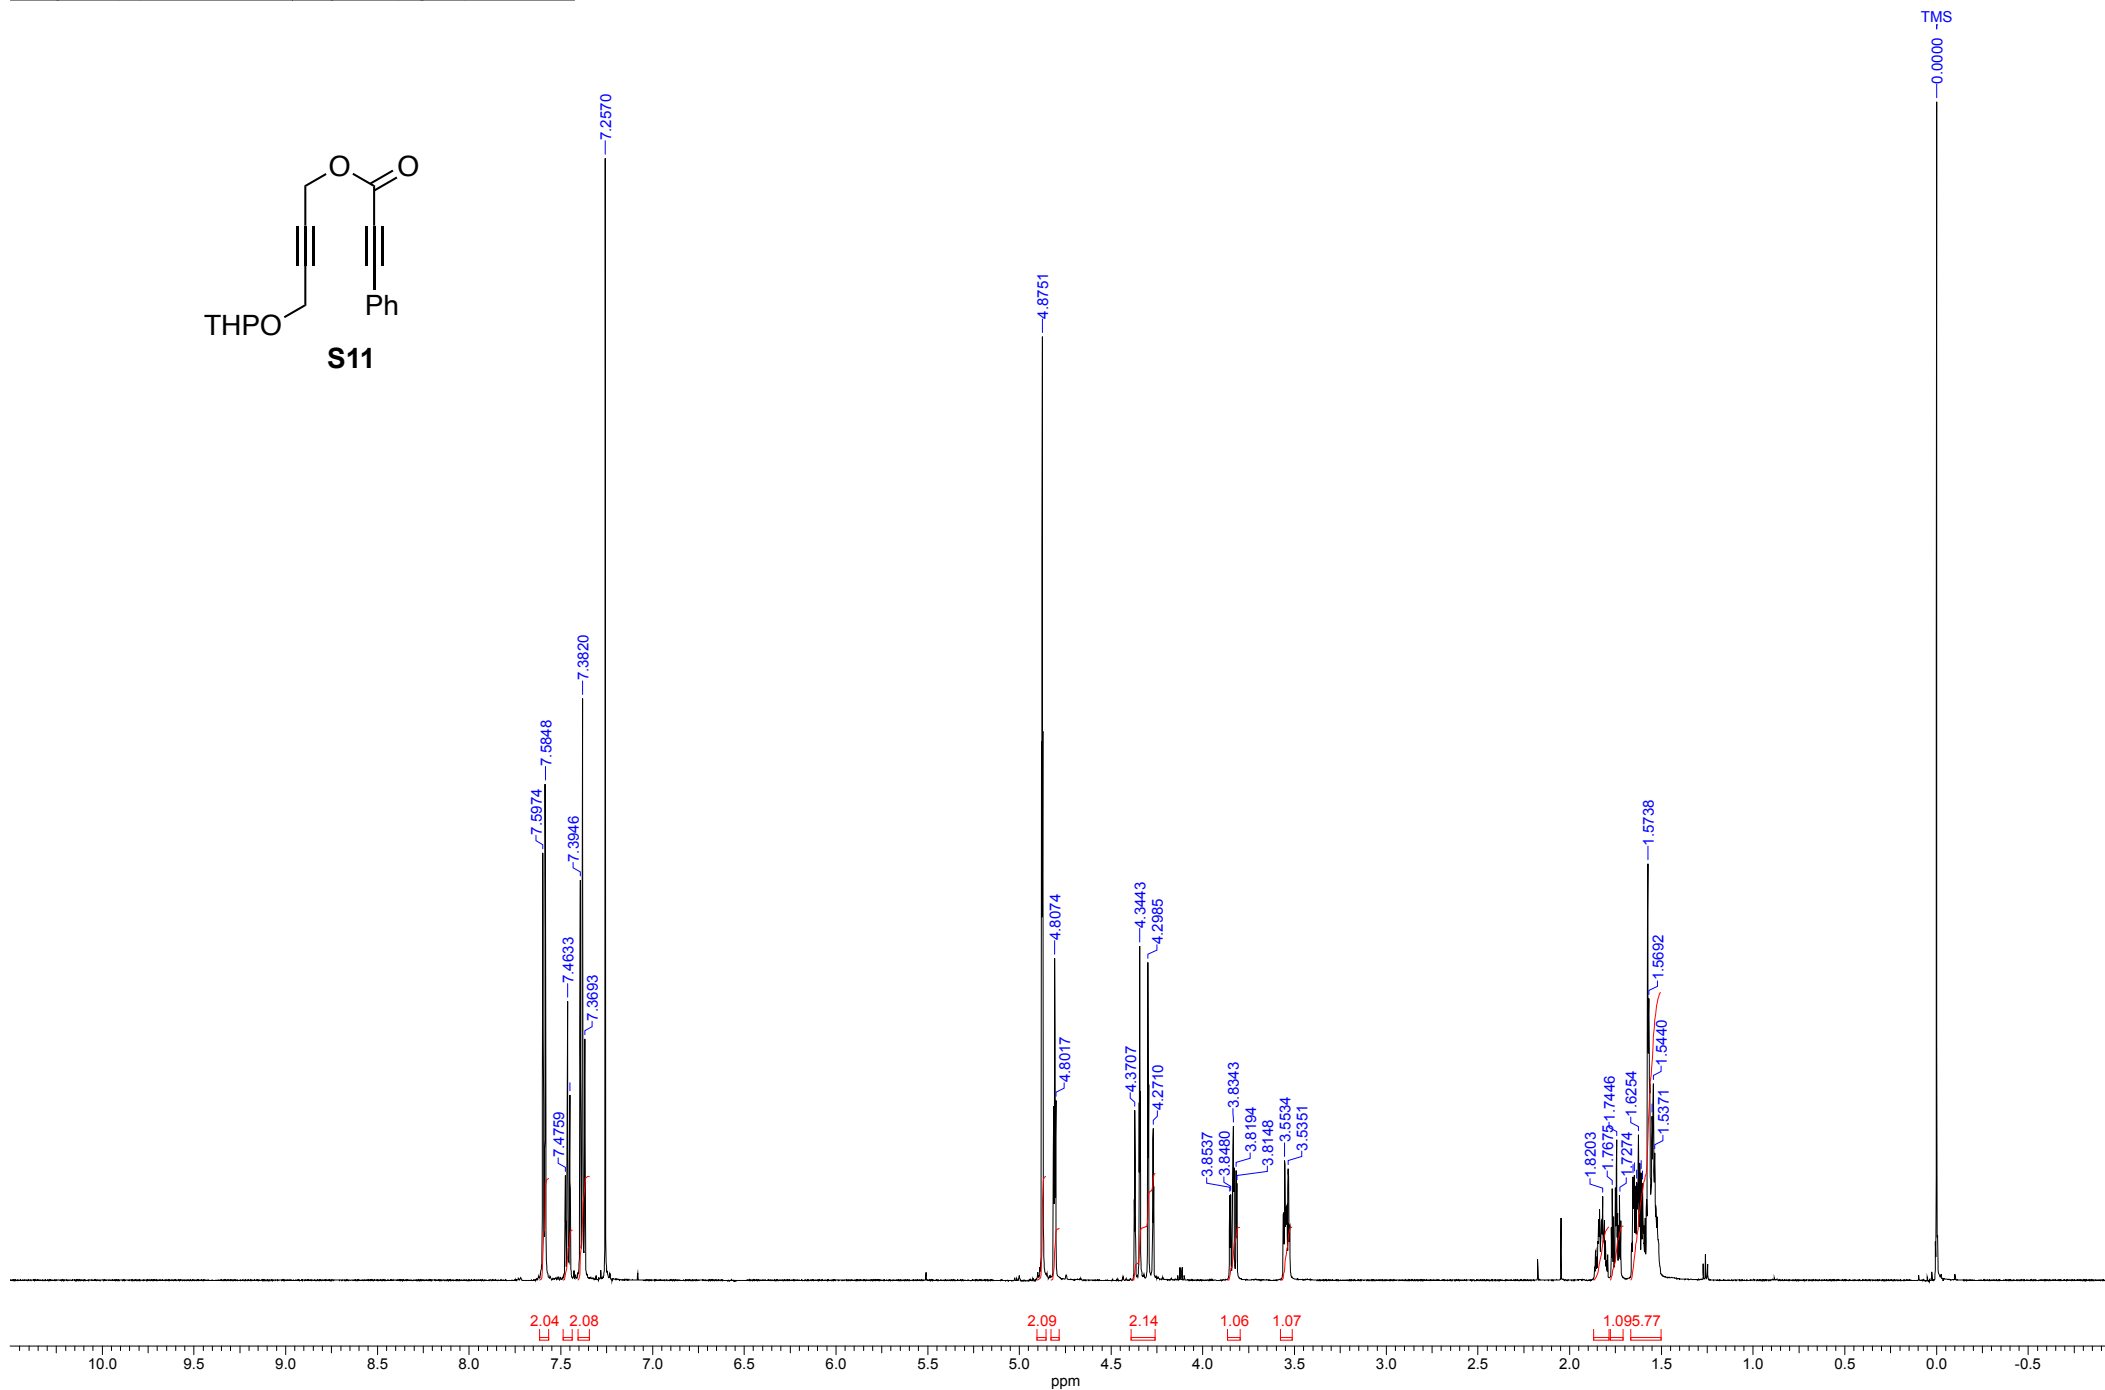



|                        |          |                        |                                  |              |                      |                |                                                 |
|------------------------|----------|------------------------|----------------------------------|--------------|----------------------|----------------|-------------------------------------------------|
| Acquisition Time (sec) | 0.6921   | Comment                | single pulse decoupled gated NOE | Date         | 10 Mar 2021 19:13:34 | File Name      | F:\NMR CE t H \tawatari\TT0746-13C carbon-1.als |
| Frequency (MHz)        | 150.00   | Number of Transients   | 256                              | Points Count | 26214                | Pulse Sequence | carbon_cool.jxp                                 |
| Sweep Width (Hz)       | 37876.77 | Temperature (degree C) | 20.900                           |              |                      | Solvent        | CHLOROFORM-D                                    |

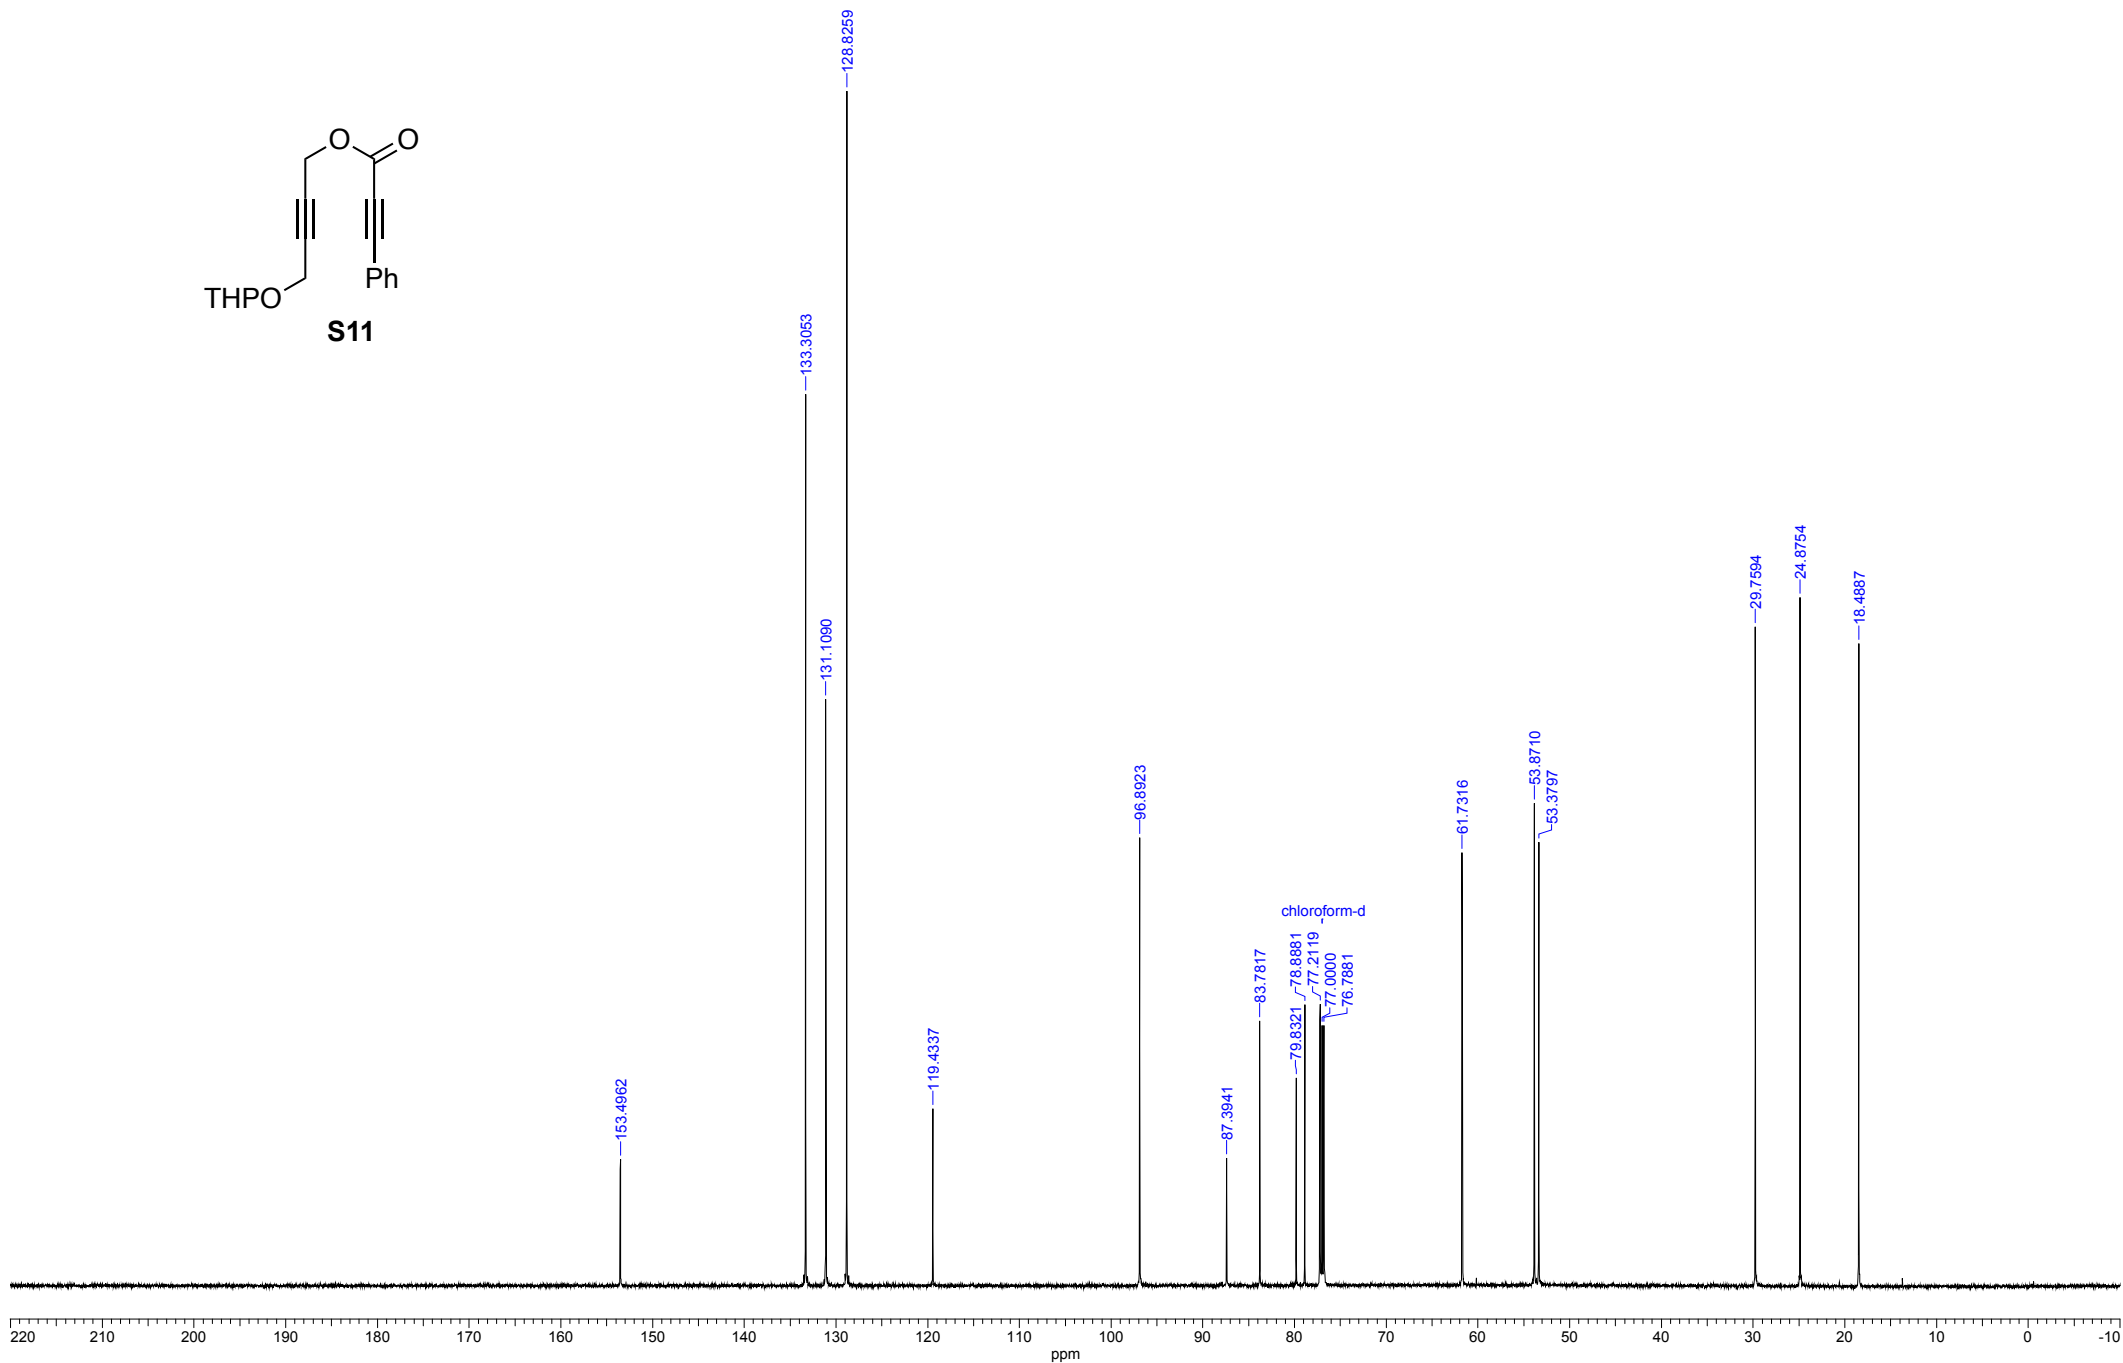

|                        |         |                        |              |                      |                      |                       |                                                  |              |
|------------------------|---------|------------------------|--------------|----------------------|----------------------|-----------------------|--------------------------------------------------|--------------|
| Acquisition Time (sec) | 1.8153  | Comment                | single pulse | Date                 | 13 Mar 2021 21:19:18 | File Name             | F:\NMR CE t H \tawatari\TT0747-1H_proton-1-1.als |              |
| Frequency (MHz)        | 600.17  | Nucleus                | 1H           | Number of Transients | 8                    | Original Points Count | 16384                                            |              |
| Sweep Width (Hz)       | 9025.27 | Temperature (degree C) | 20.900       | Points Count         | 13120                | Pulse Sequence        | proton.jxp                                       |              |
|                        |         |                        |              |                      |                      |                       | Solvent                                          | CHLOROFORM-D |

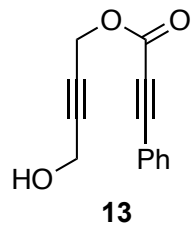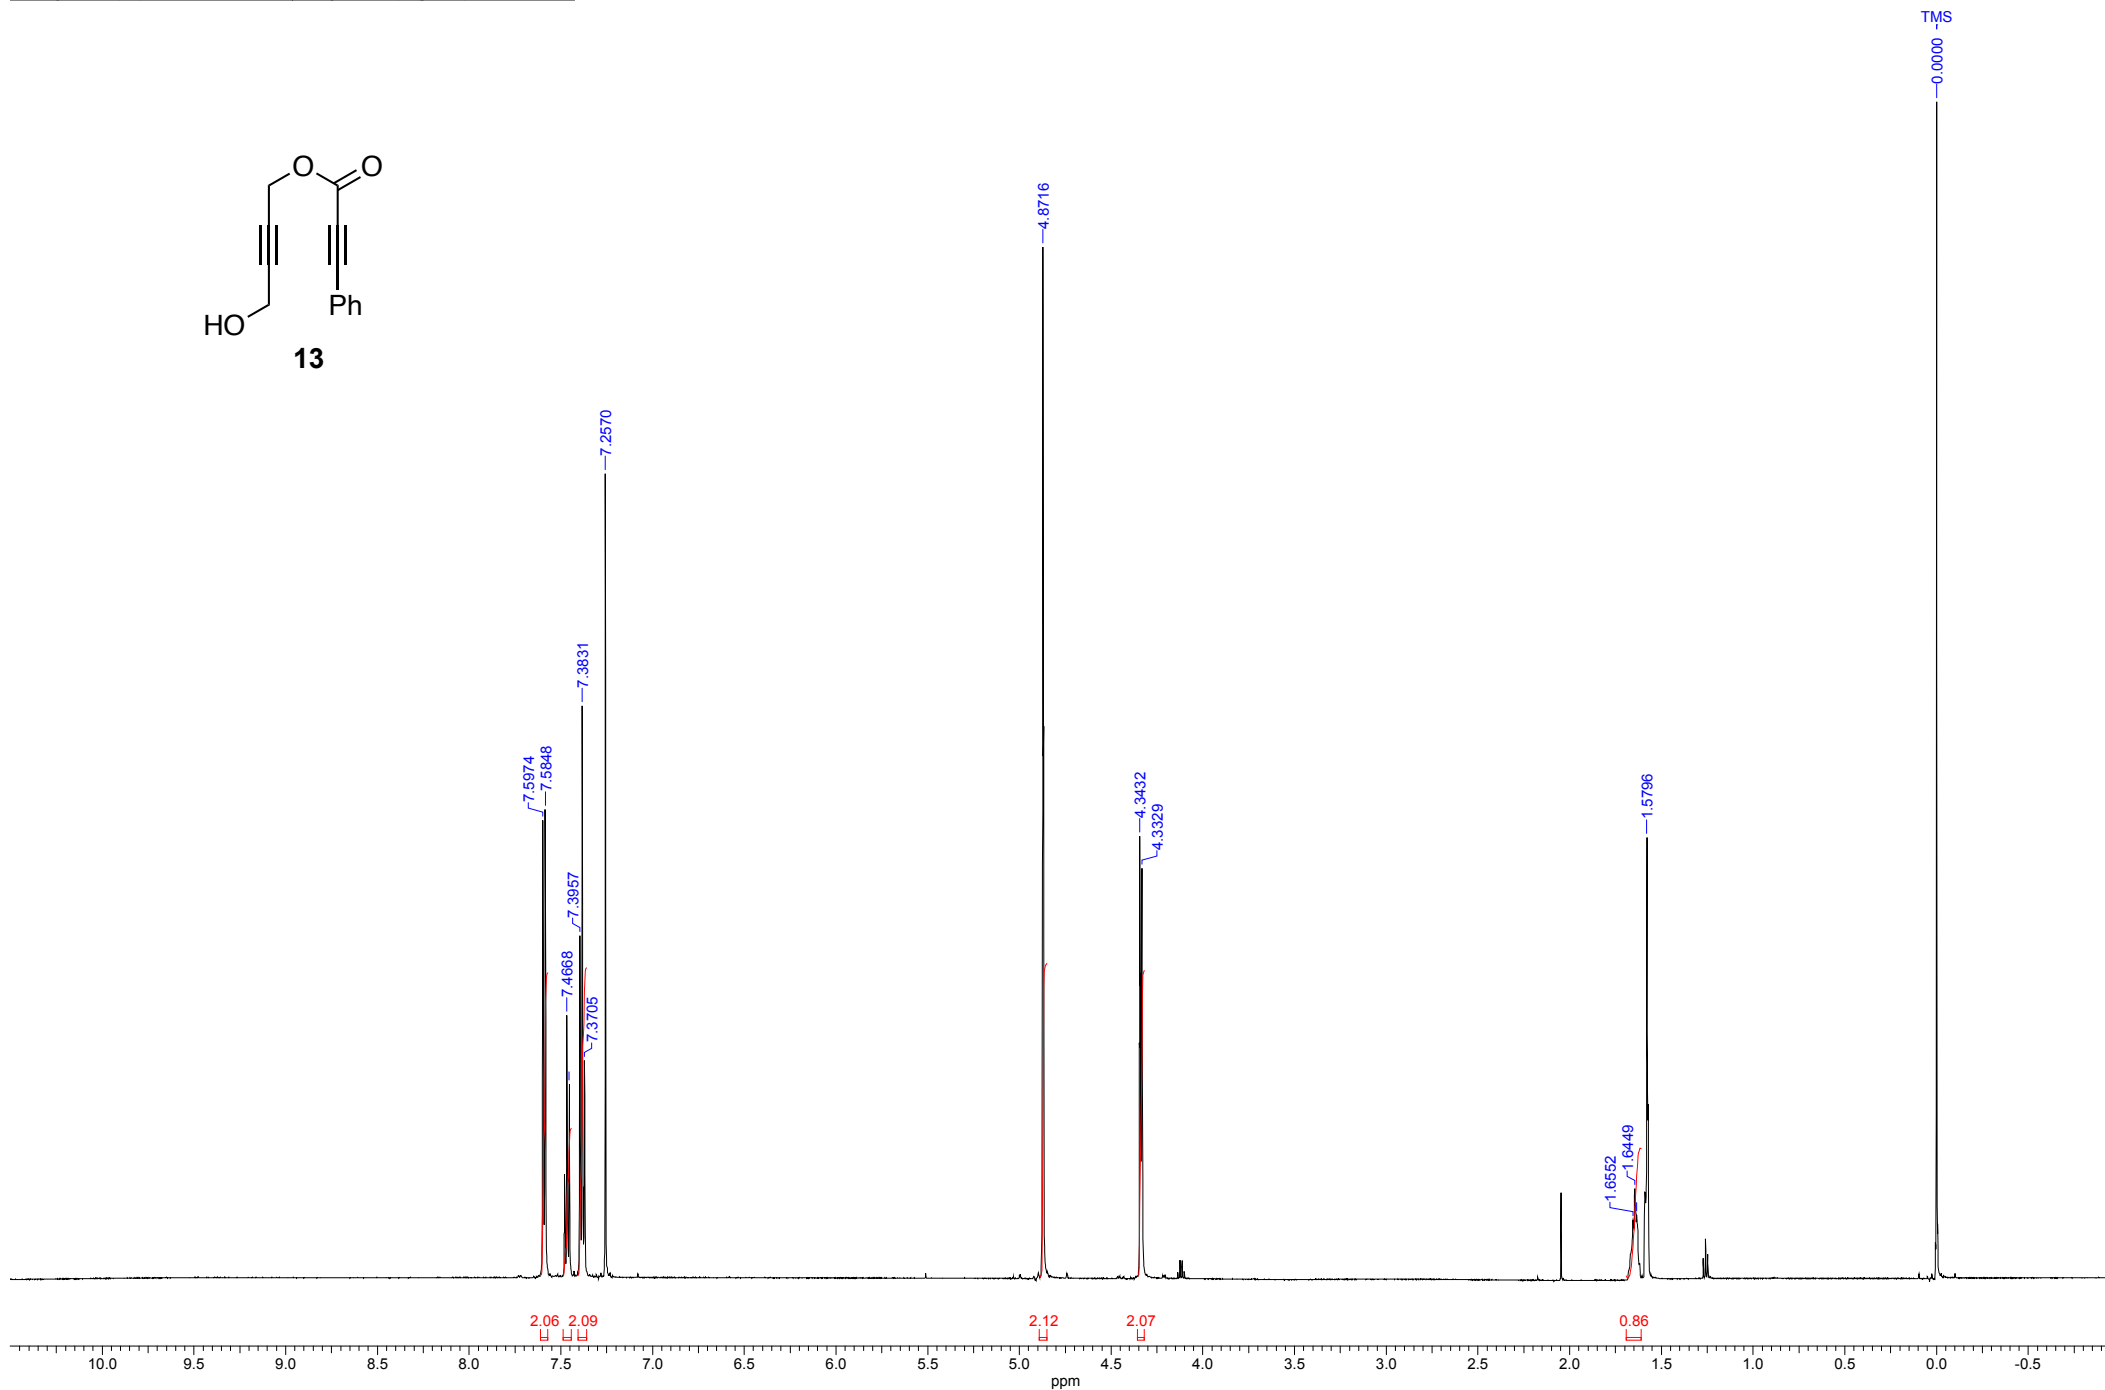

|                        |          |                        |                                  |                       |                      |              |                                                 |
|------------------------|----------|------------------------|----------------------------------|-----------------------|----------------------|--------------|-------------------------------------------------|
| Acquisition Time (sec) | 0.6921   | Comment                | single pulse decoupled gated NOE | Date                  | 13 Mar 2021 21:19:00 | File Name    | F:\NMR_CE t H \tawatari\TT0747-13C carbon-1.als |
| Frequency (MHz)        | 150.00   | Number of Transients   | 128                              | Original Points Count | 26214                | Points Count | 26214                                           |
| Sweep Width (Hz)       | 37876.77 | Temperature (degree C) | 20.700                           | Pulse Sequence        | carbon_cool.jxp      | Solvent      | CHLOROFORM-D                                    |

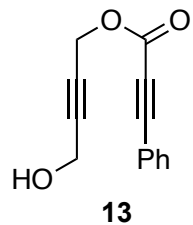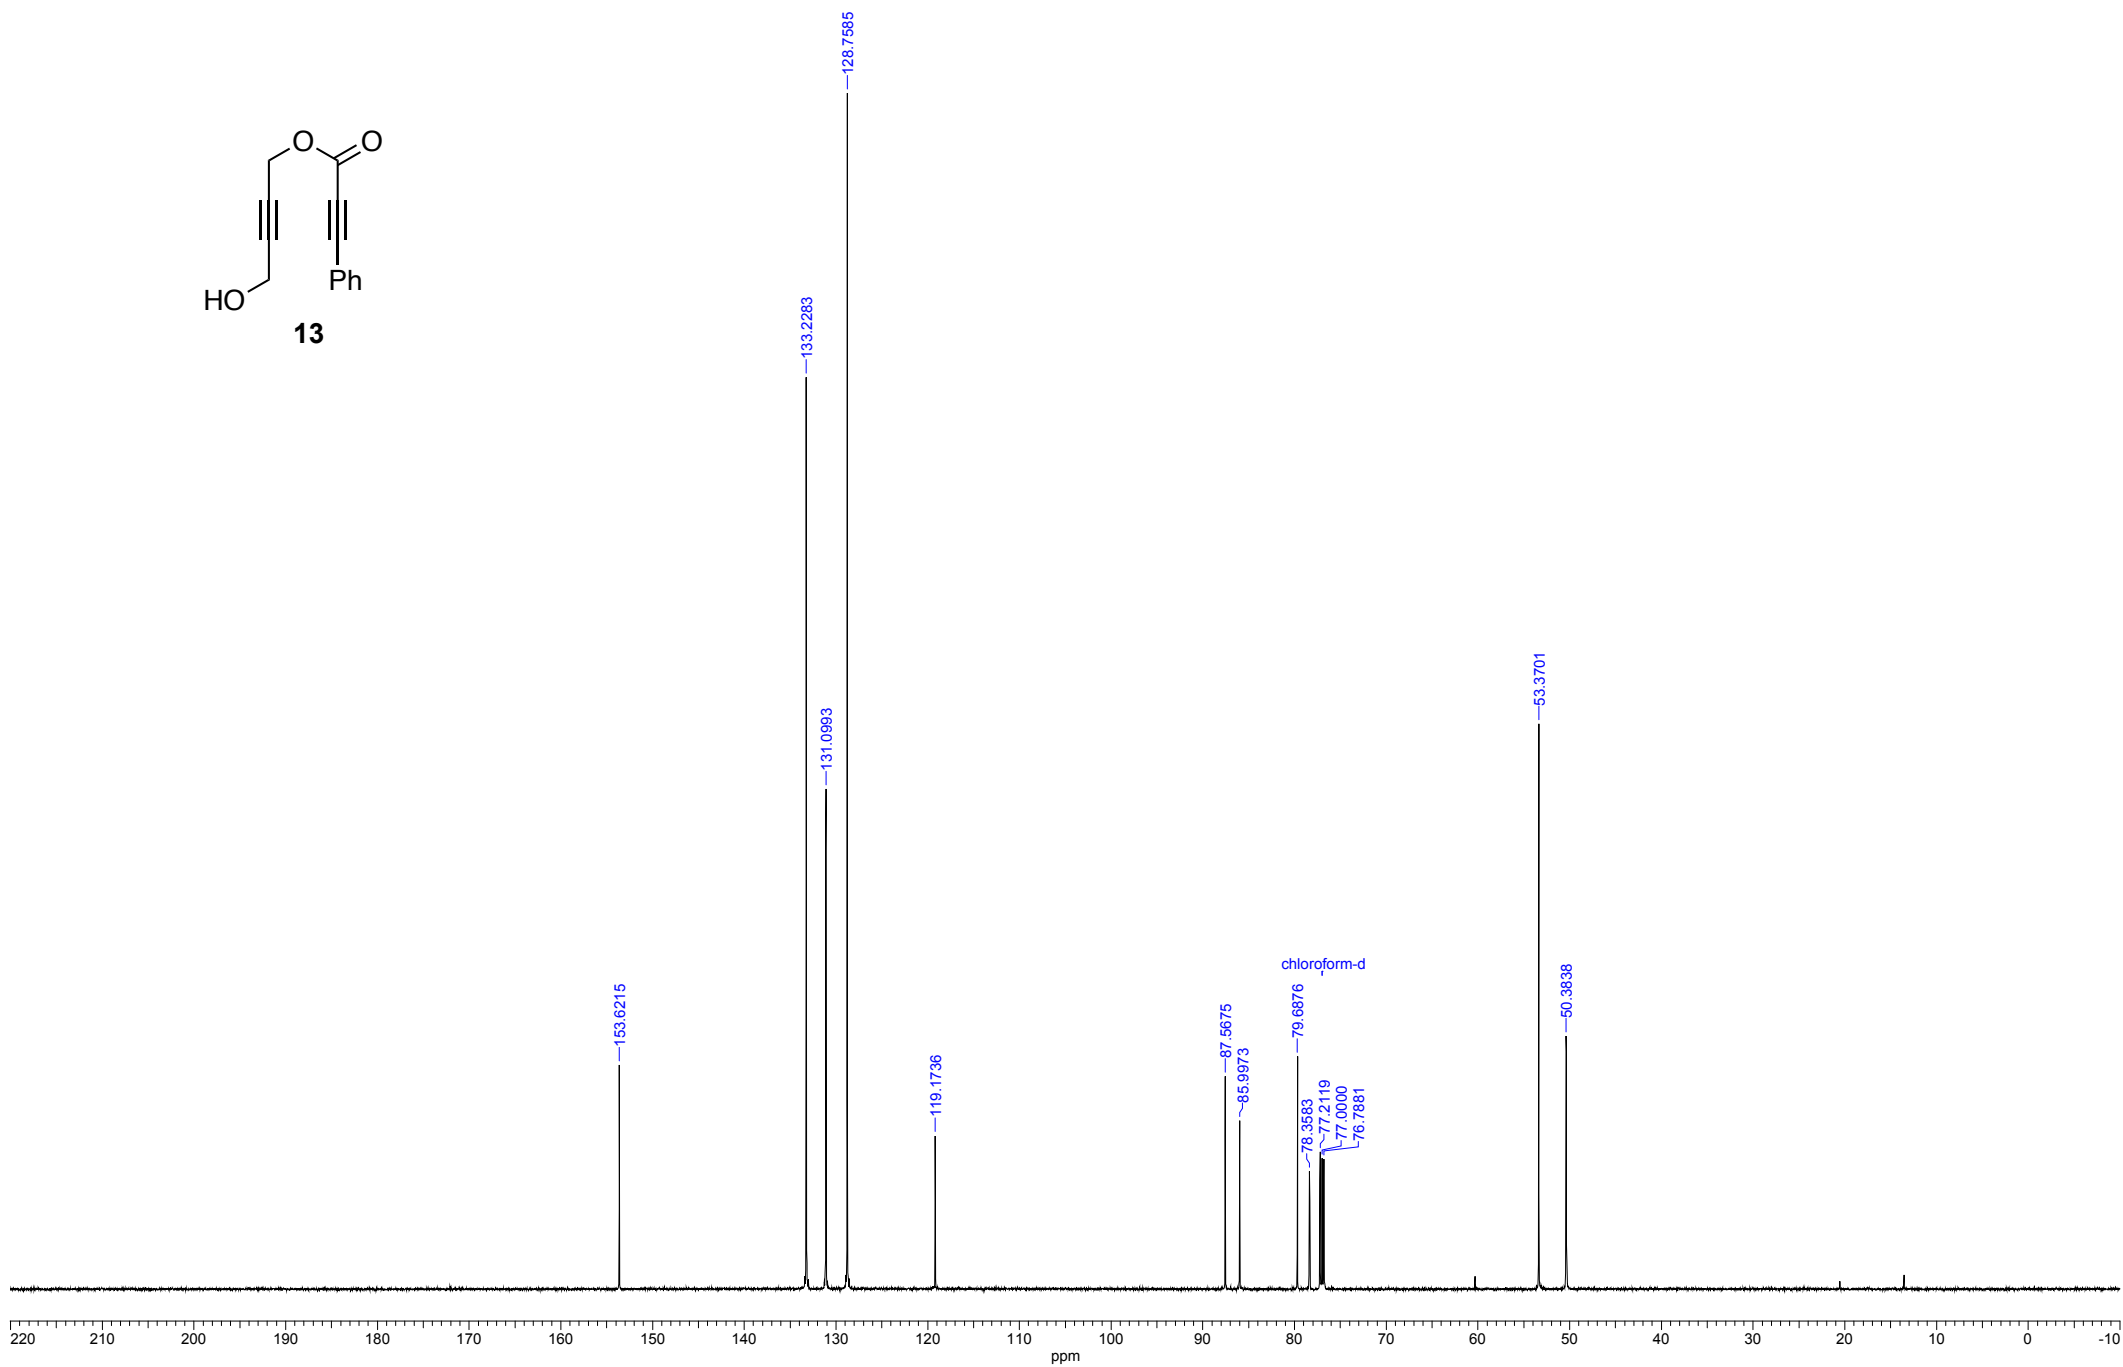

|                        |         |                        |                      |              |                                       |                 |                  |         |              |
|------------------------|---------|------------------------|----------------------|--------------|---------------------------------------|-----------------|------------------|---------|--------------|
| Acquisition Time (sec) | 3.4919  | Date                   | 18 Jun 2020 22:49:08 | File Name    | F:\NMR CE t H \tawatari\TT0467-1H.als | Frequency (MHz) | 500.00           | Nucleus | 1H           |
| Number of Transients   | 8       | Original Points Count  | 26214                | Points Count | 26214                                 | Pulse Sequence  | single_pulse.ex2 | Solvent | CHLOROFORM-D |
| Sweep Width (Hz)       | 7507.11 | Temperature (degree C) | 22.000               |              |                                       |                 |                  |         |              |

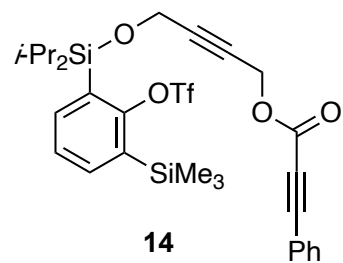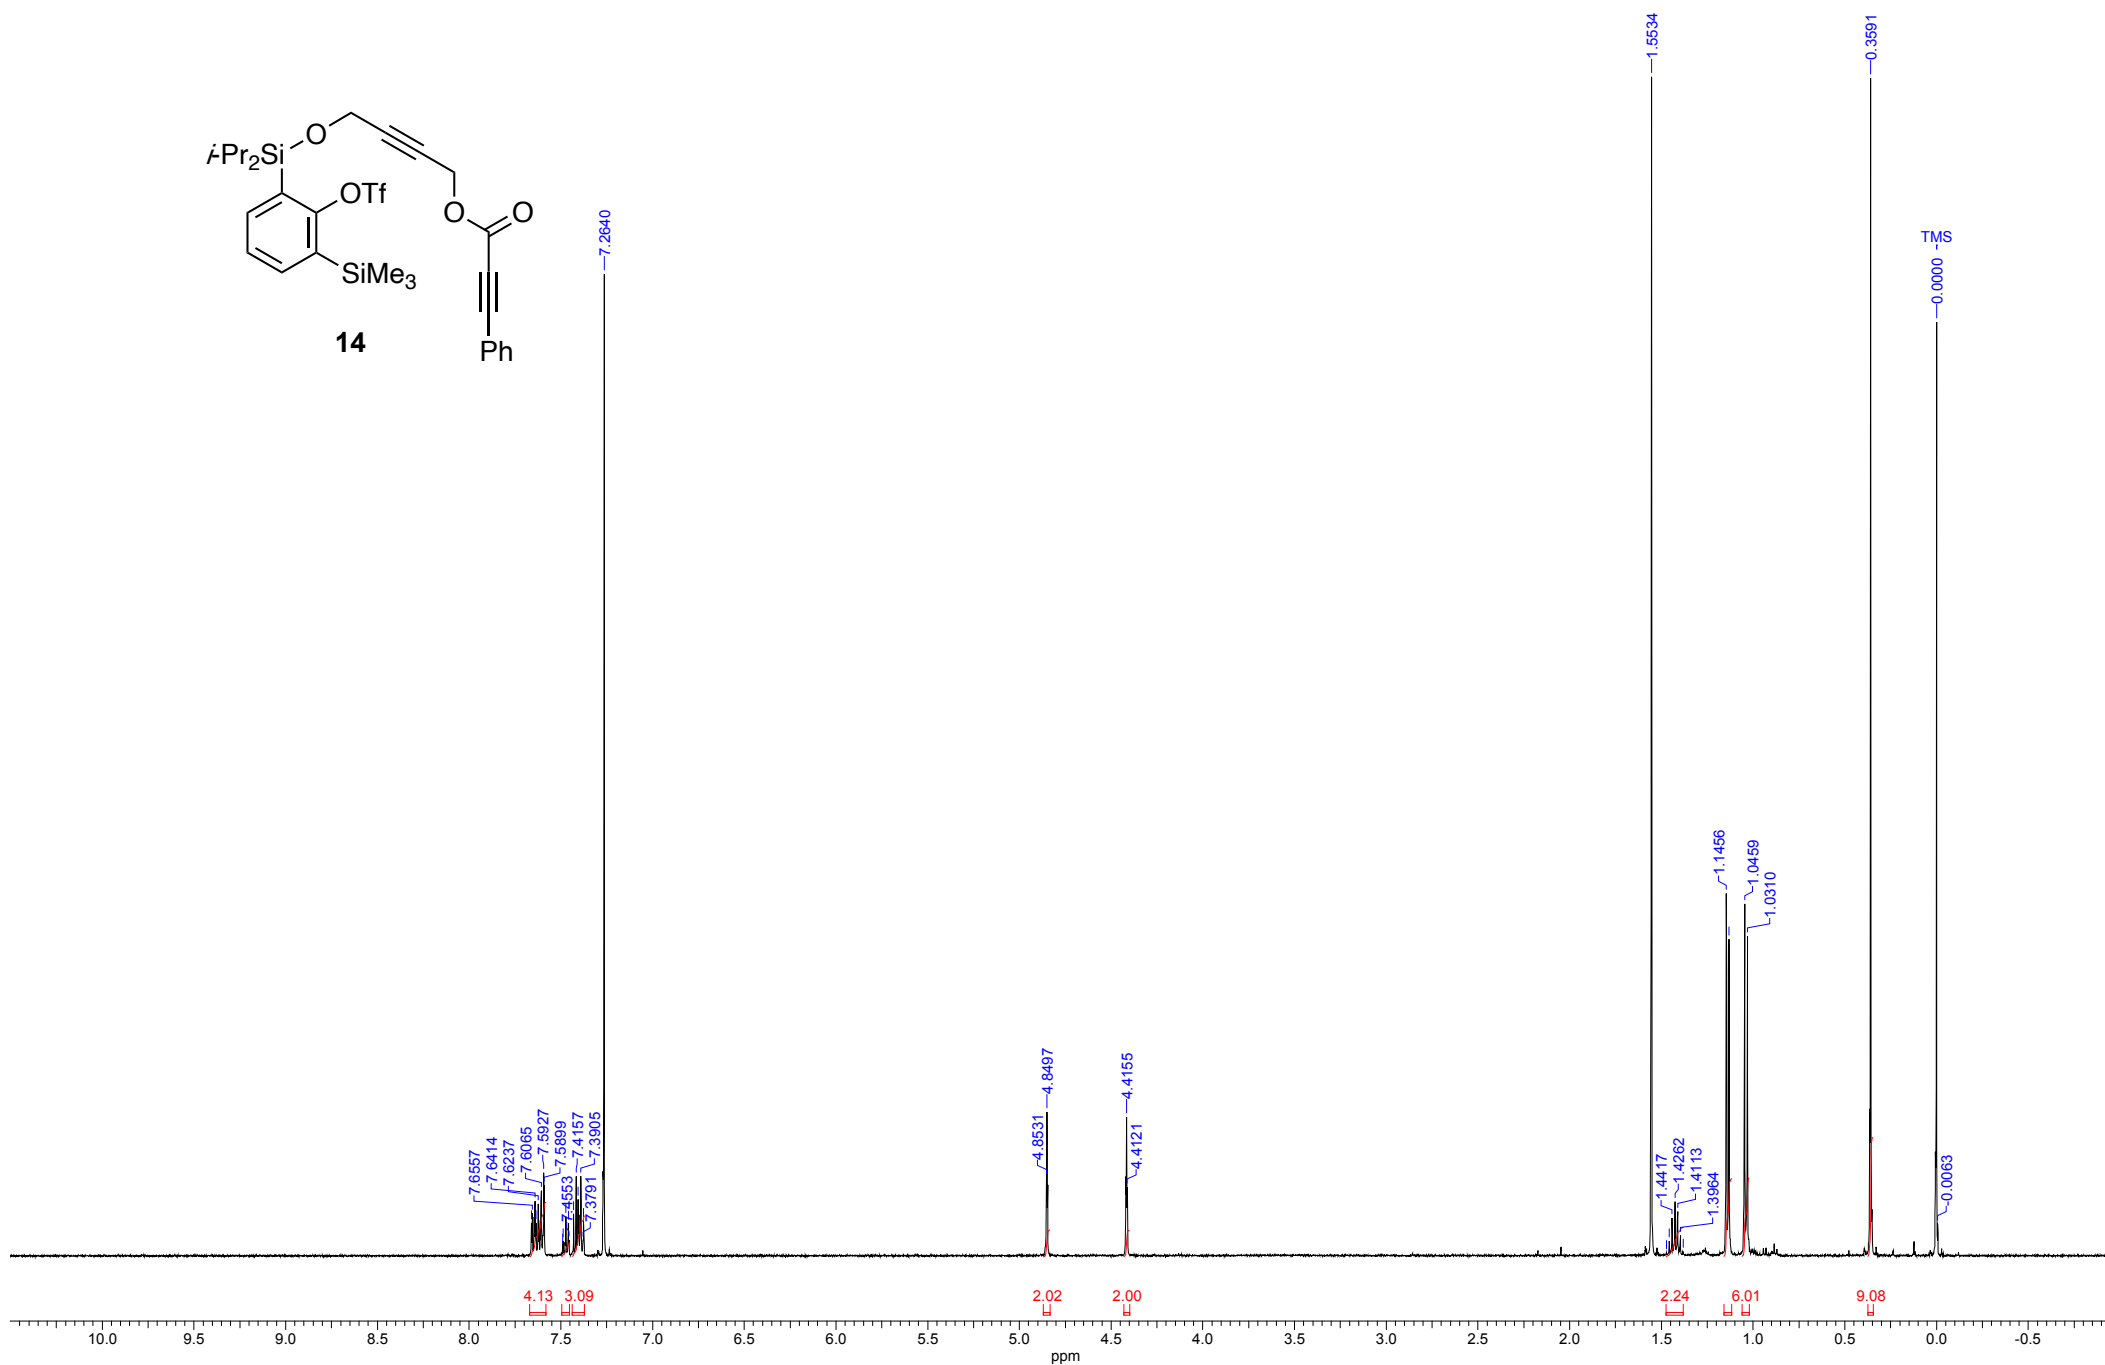

|                        |          |                        |                      |              |                                       |                 |                  |         |              |
|------------------------|----------|------------------------|----------------------|--------------|---------------------------------------|-----------------|------------------|---------|--------------|
| Acquisition Time (sec) | 0.8336   | Date                   | 18 Jun 2020 22:49:38 | File Name    | F:\NMR_CE_t_H\tawatari\TT0467-13C.als | Frequency (MHz) | 125.00           | Nucleus | 13C          |
| Number of Transients   | 256      | Original Points Count  | 26214                | Points Count | 26214                                 | Pulse Sequence  | single_pulse_dec | Solvent | CHLOROFORM-D |
| Sweep Width (Hz)       | 31444.86 | Temperature (degree C) | 22.600               |              |                                       |                 |                  |         |              |

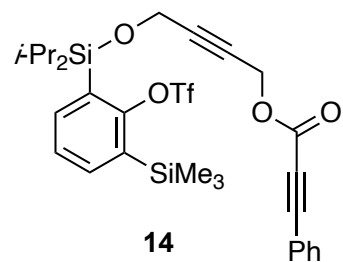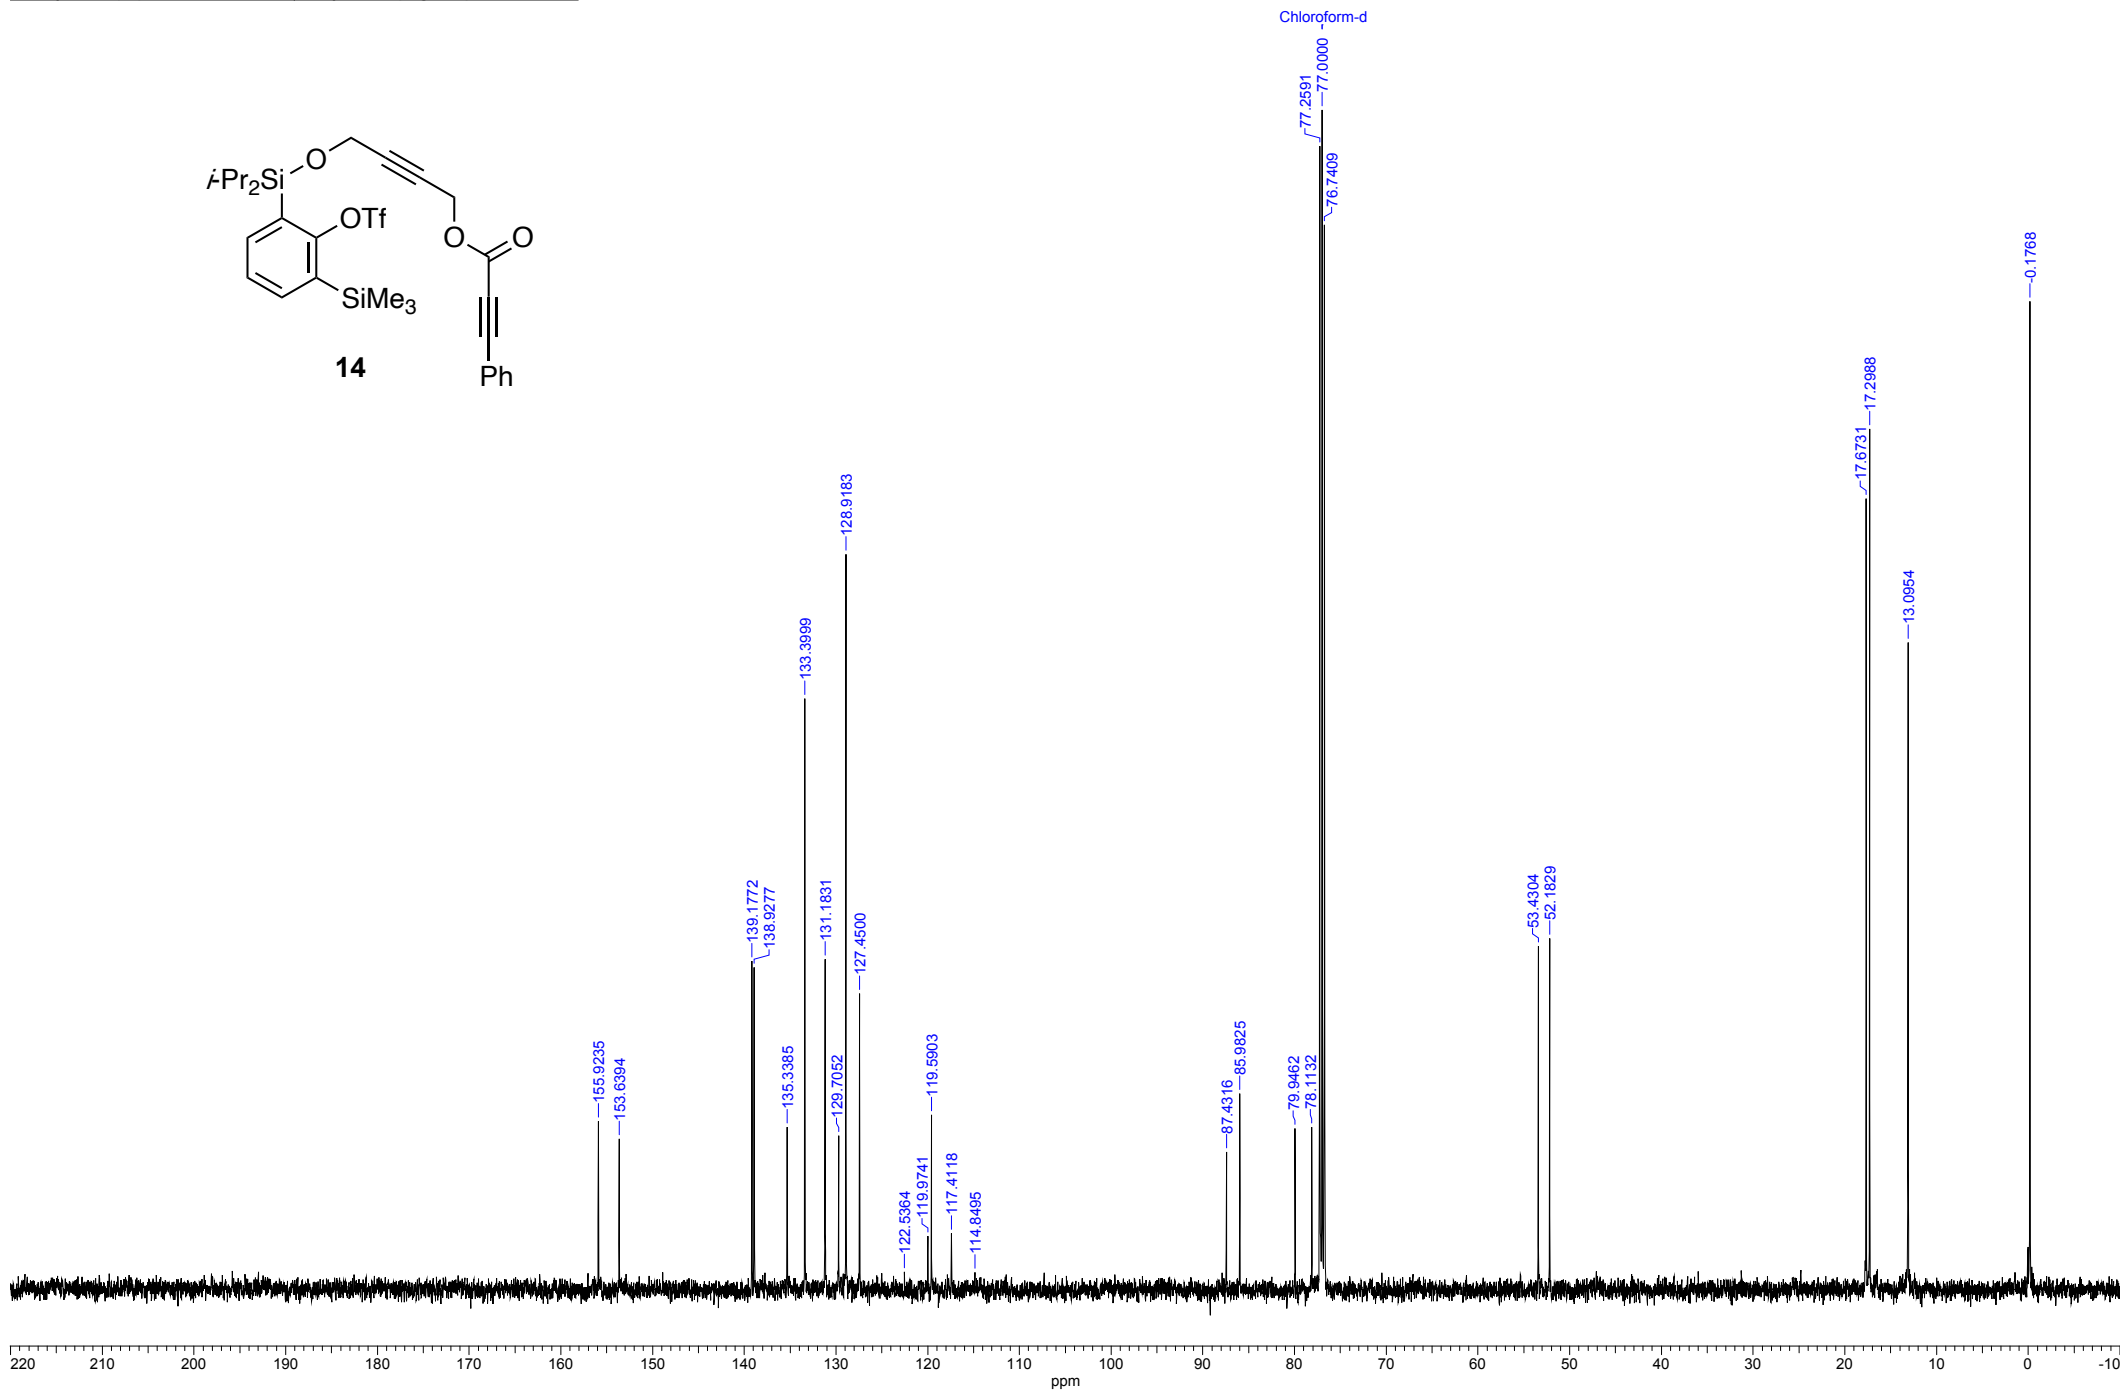

|                        |         |                        |              |                      |                      |                       |                                                  |
|------------------------|---------|------------------------|--------------|----------------------|----------------------|-----------------------|--------------------------------------------------|
| Acquisition Time (sec) | 1.8153  | Comment                | single pulse | Date                 | 05 Feb 2021 21:14:56 | File Name             | F:\NMR CE t H \tawatari\TT0705-1H_proton-1-1.als |
| Frequency (MHz)        | 600.17  | Nucleus                | 1H           | Number of Transients | 8                    | Original Points Count | 16384                                            |
| Sweep Width (Hz)       | 9025.27 | Temperature (degree C) | 20.100       | Points Count         | 13120                | Pulse Sequence        | proton.jxp                                       |
|                        |         |                        |              |                      |                      | Solvent               | CHLOROFORM-D                                     |

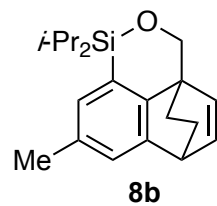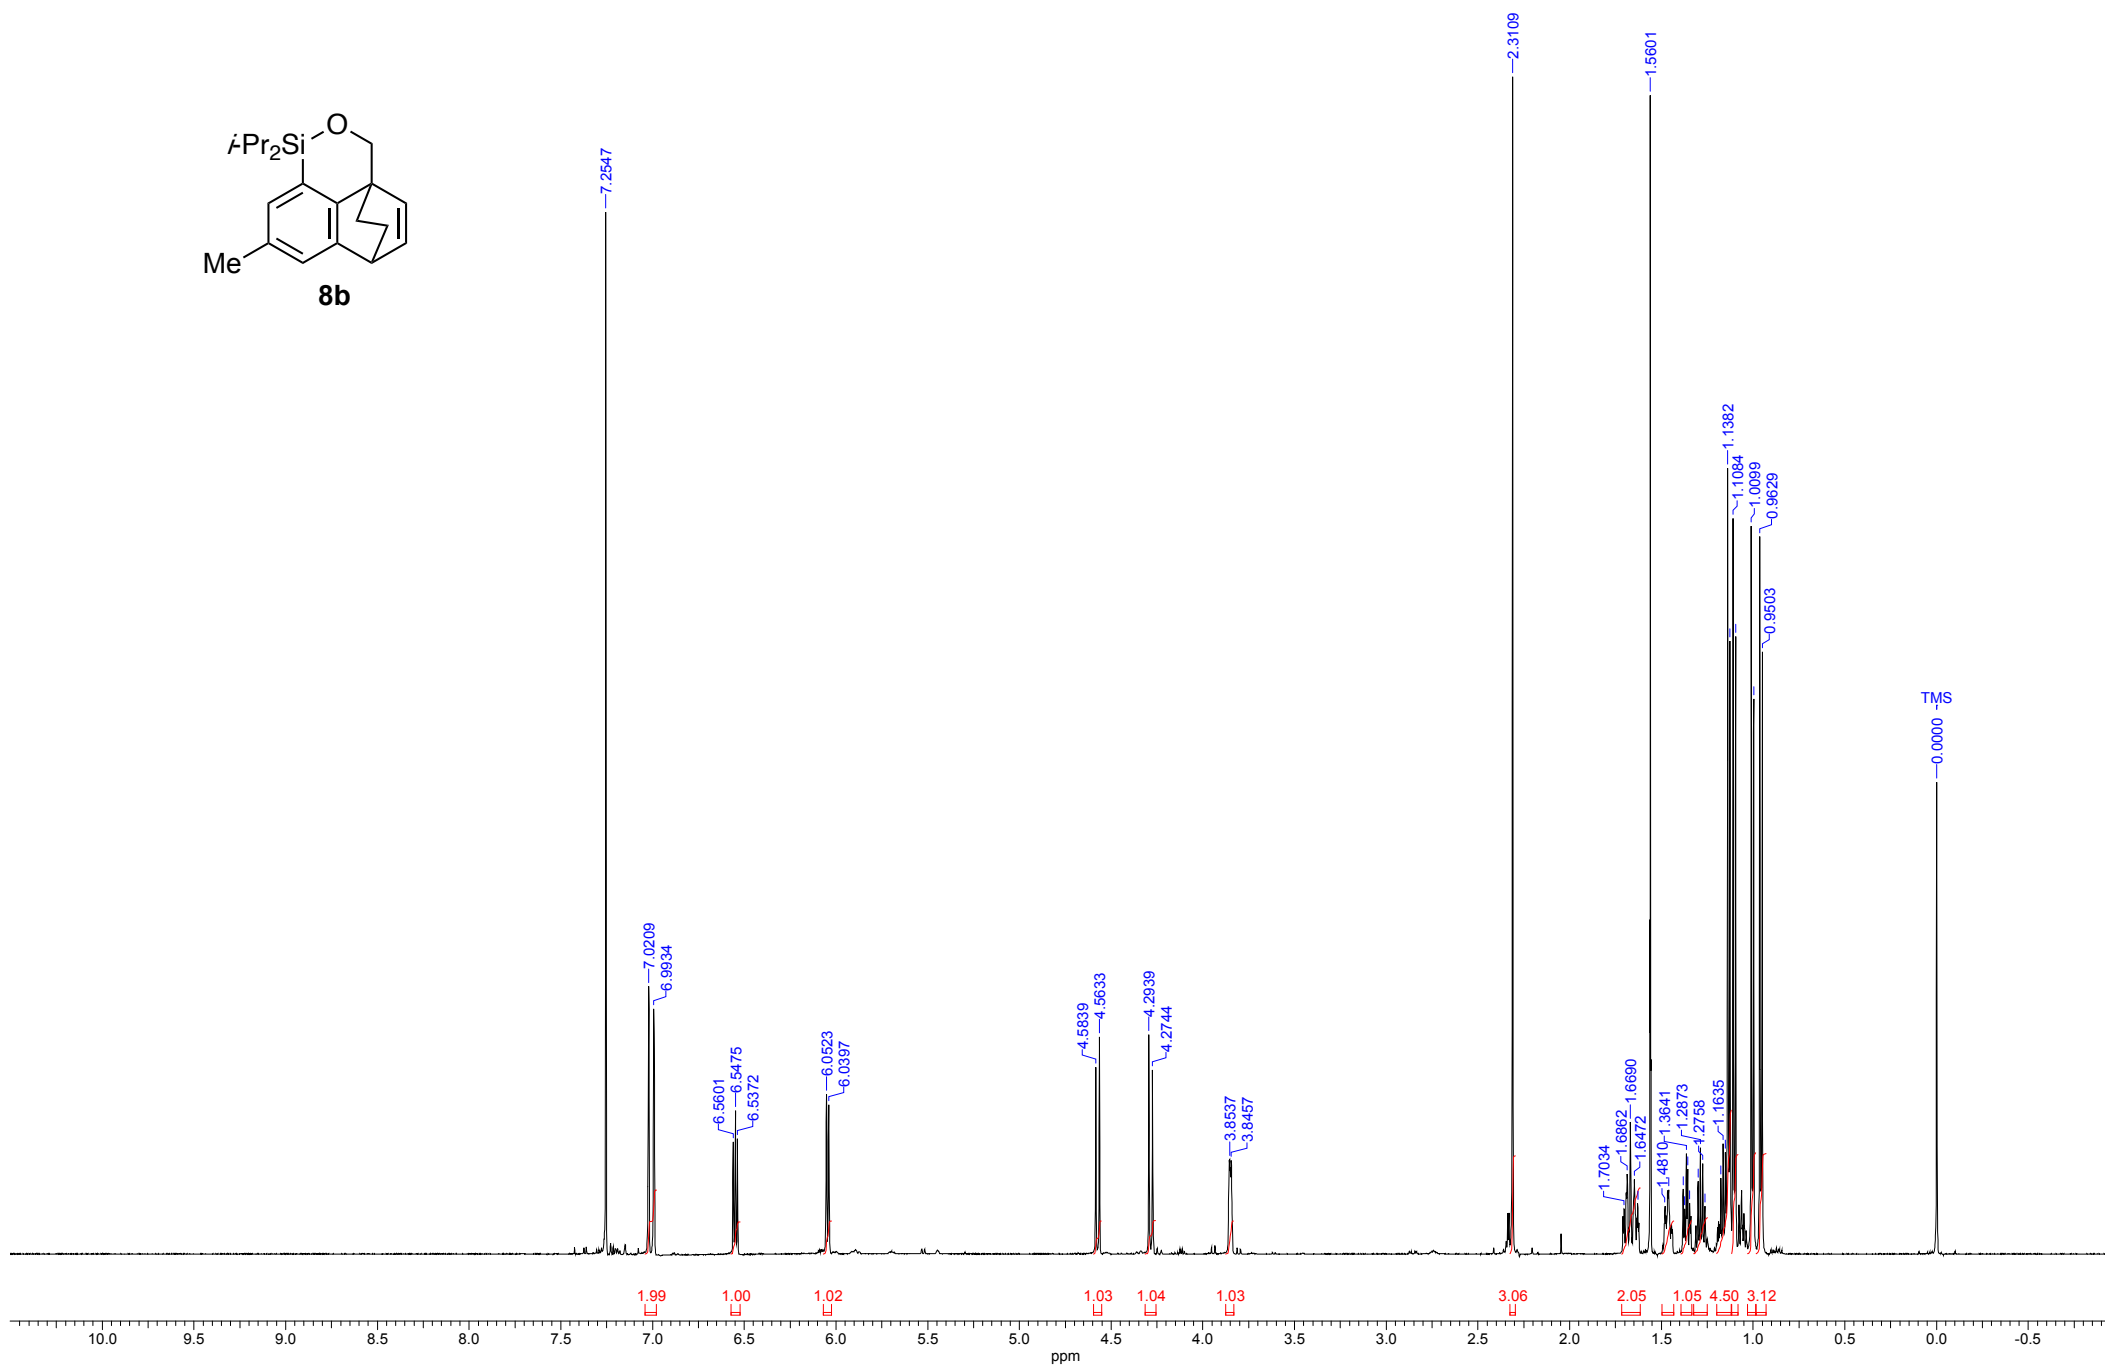

|                        |          |                        |                                  |                       |                      |              |                                                 |
|------------------------|----------|------------------------|----------------------------------|-----------------------|----------------------|--------------|-------------------------------------------------|
| Acquisition Time (sec) | 0.6921   | Comment                | single pulse decoupled gated NOE | Date                  | 05 Feb 2021 21:14:40 | File Name    | F:\NMR CE t H \tawatari\TT0705-13C carbon-1.als |
| Frequency (MHz)        | 150.00   | Number of Transients   | 256                              | Original Points Count | 26214                | Points Count | 26214                                           |
| Sweep Width (Hz)       | 37876.77 | Temperature (degree C) | 20.200                           | Pulse Sequence        | carbon_cool.jxp      | Solvent      | CHLOROFORM-D                                    |

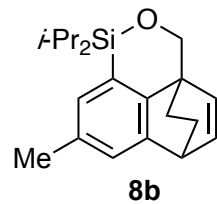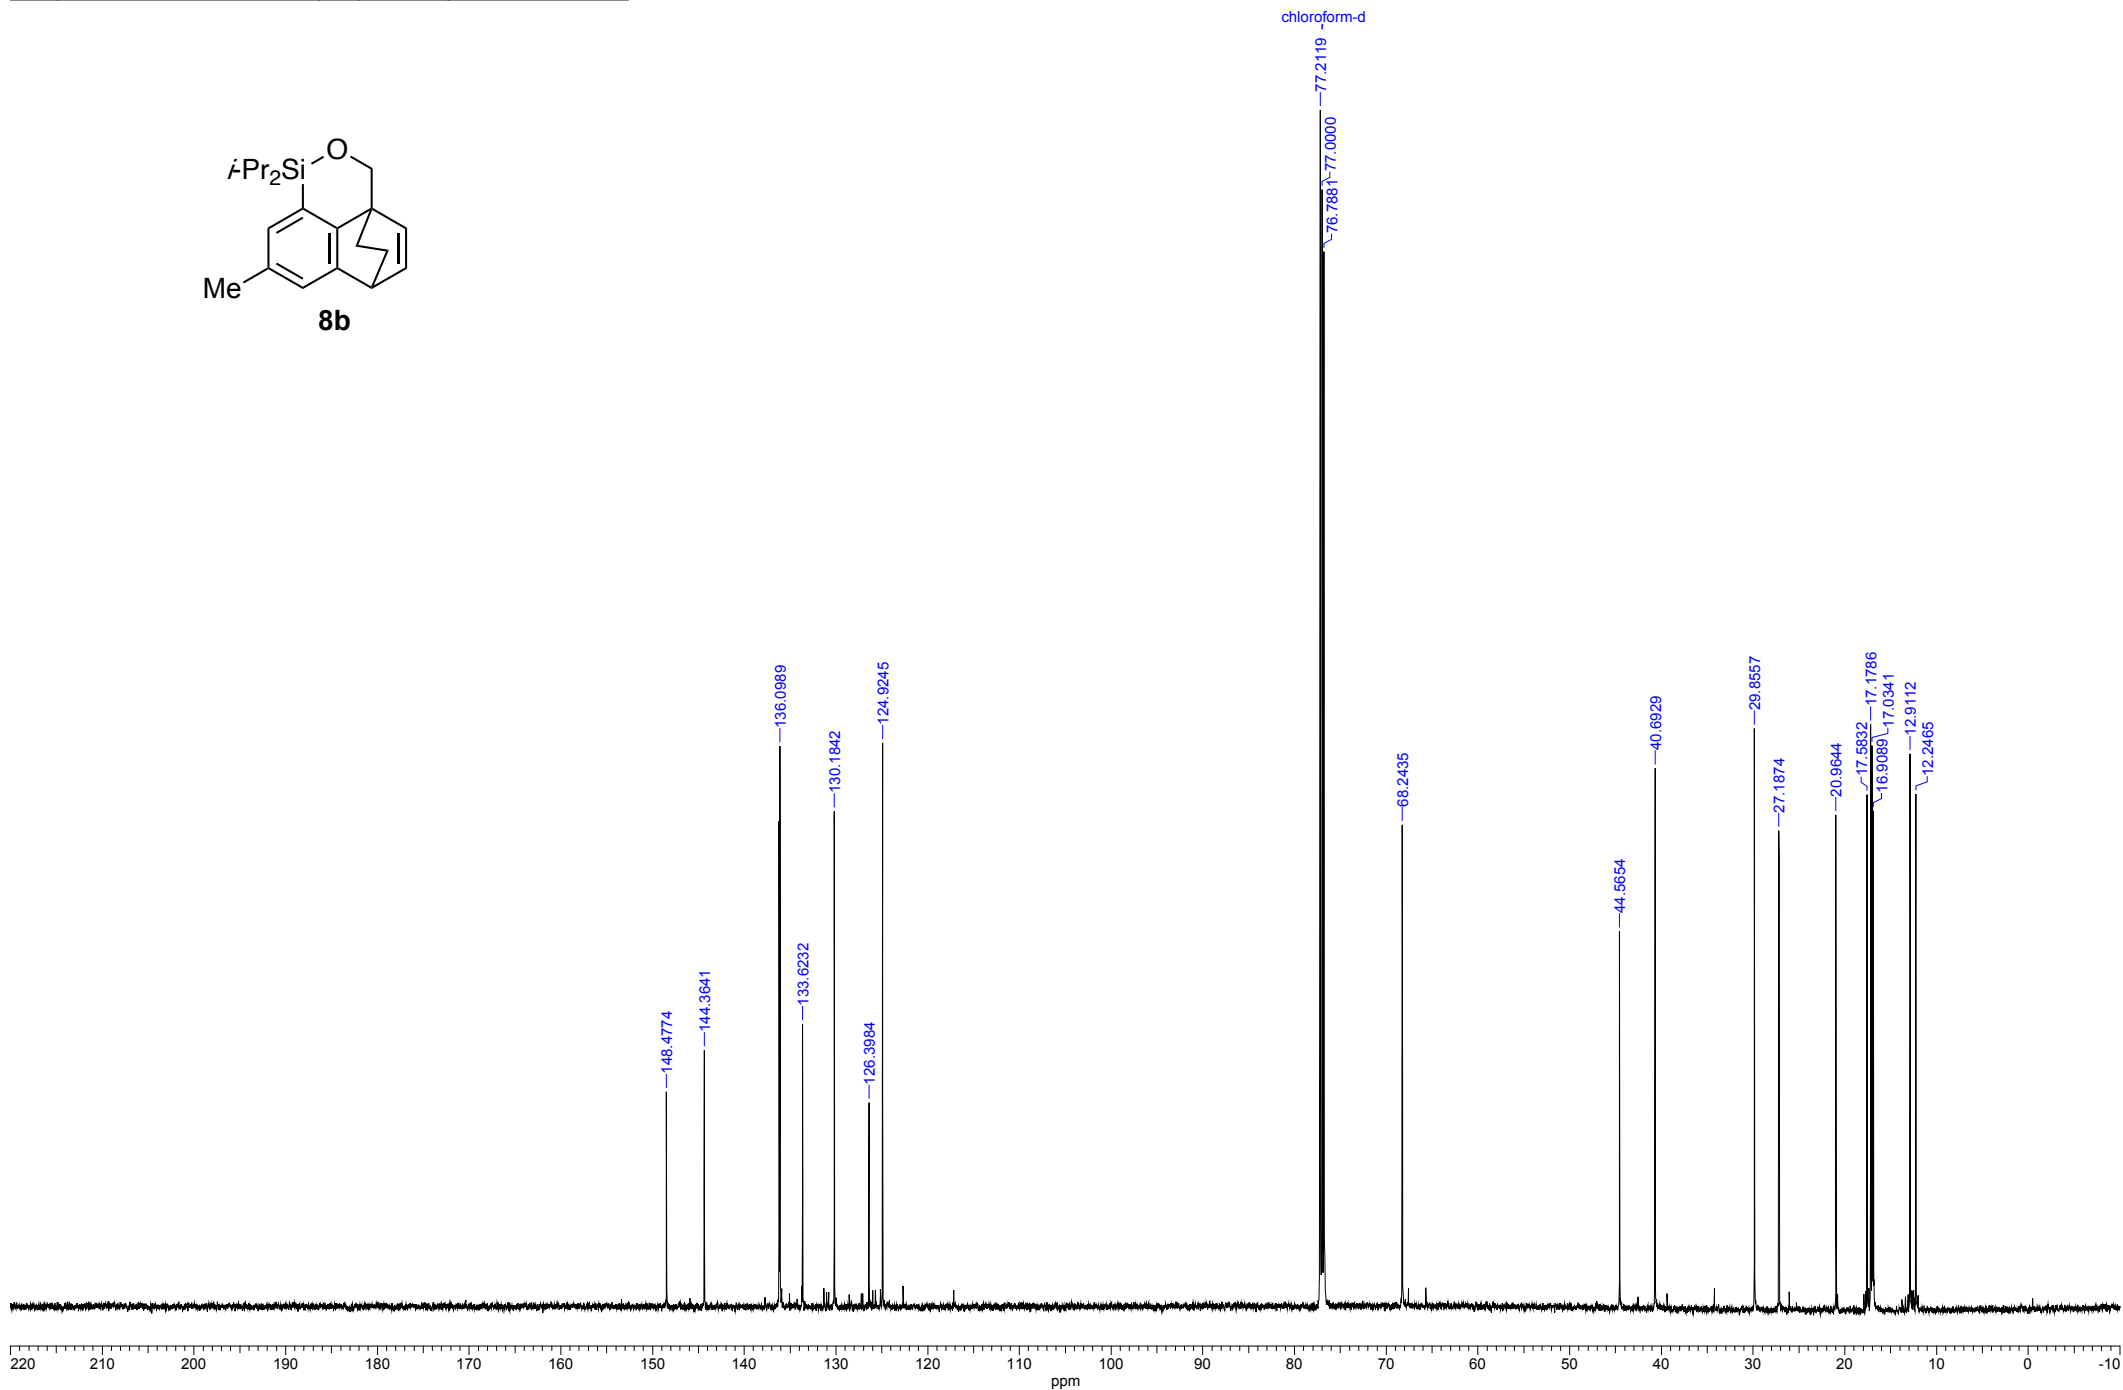

|                        |         |                        |              |                      |                      |                       |                                                        |
|------------------------|---------|------------------------|--------------|----------------------|----------------------|-----------------------|--------------------------------------------------------|
| Acquisition Time (sec) | 1.8153  | Comment                | single_pulse | Date                 | 26 Apr 2021 14:38:00 | File Name             | F:\NMR CE t H \tawatar\TT0678-1H-retake_proton-1-1.als |
| Frequency (MHz)        | 600.17  | Nucleus                | 1H           | Number of Transients | 8                    | Original Points Count | 16384                                                  |
| Sweep Width (Hz)       | 9025.27 | Temperature (degree C) | 20.600       | Points Count         | 13120                | Pulse Sequence        | proton.jxp                                             |
|                        |         |                        |              |                      |                      | Solvent               | CHLOROFORM-D                                           |

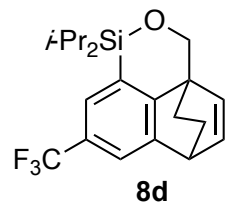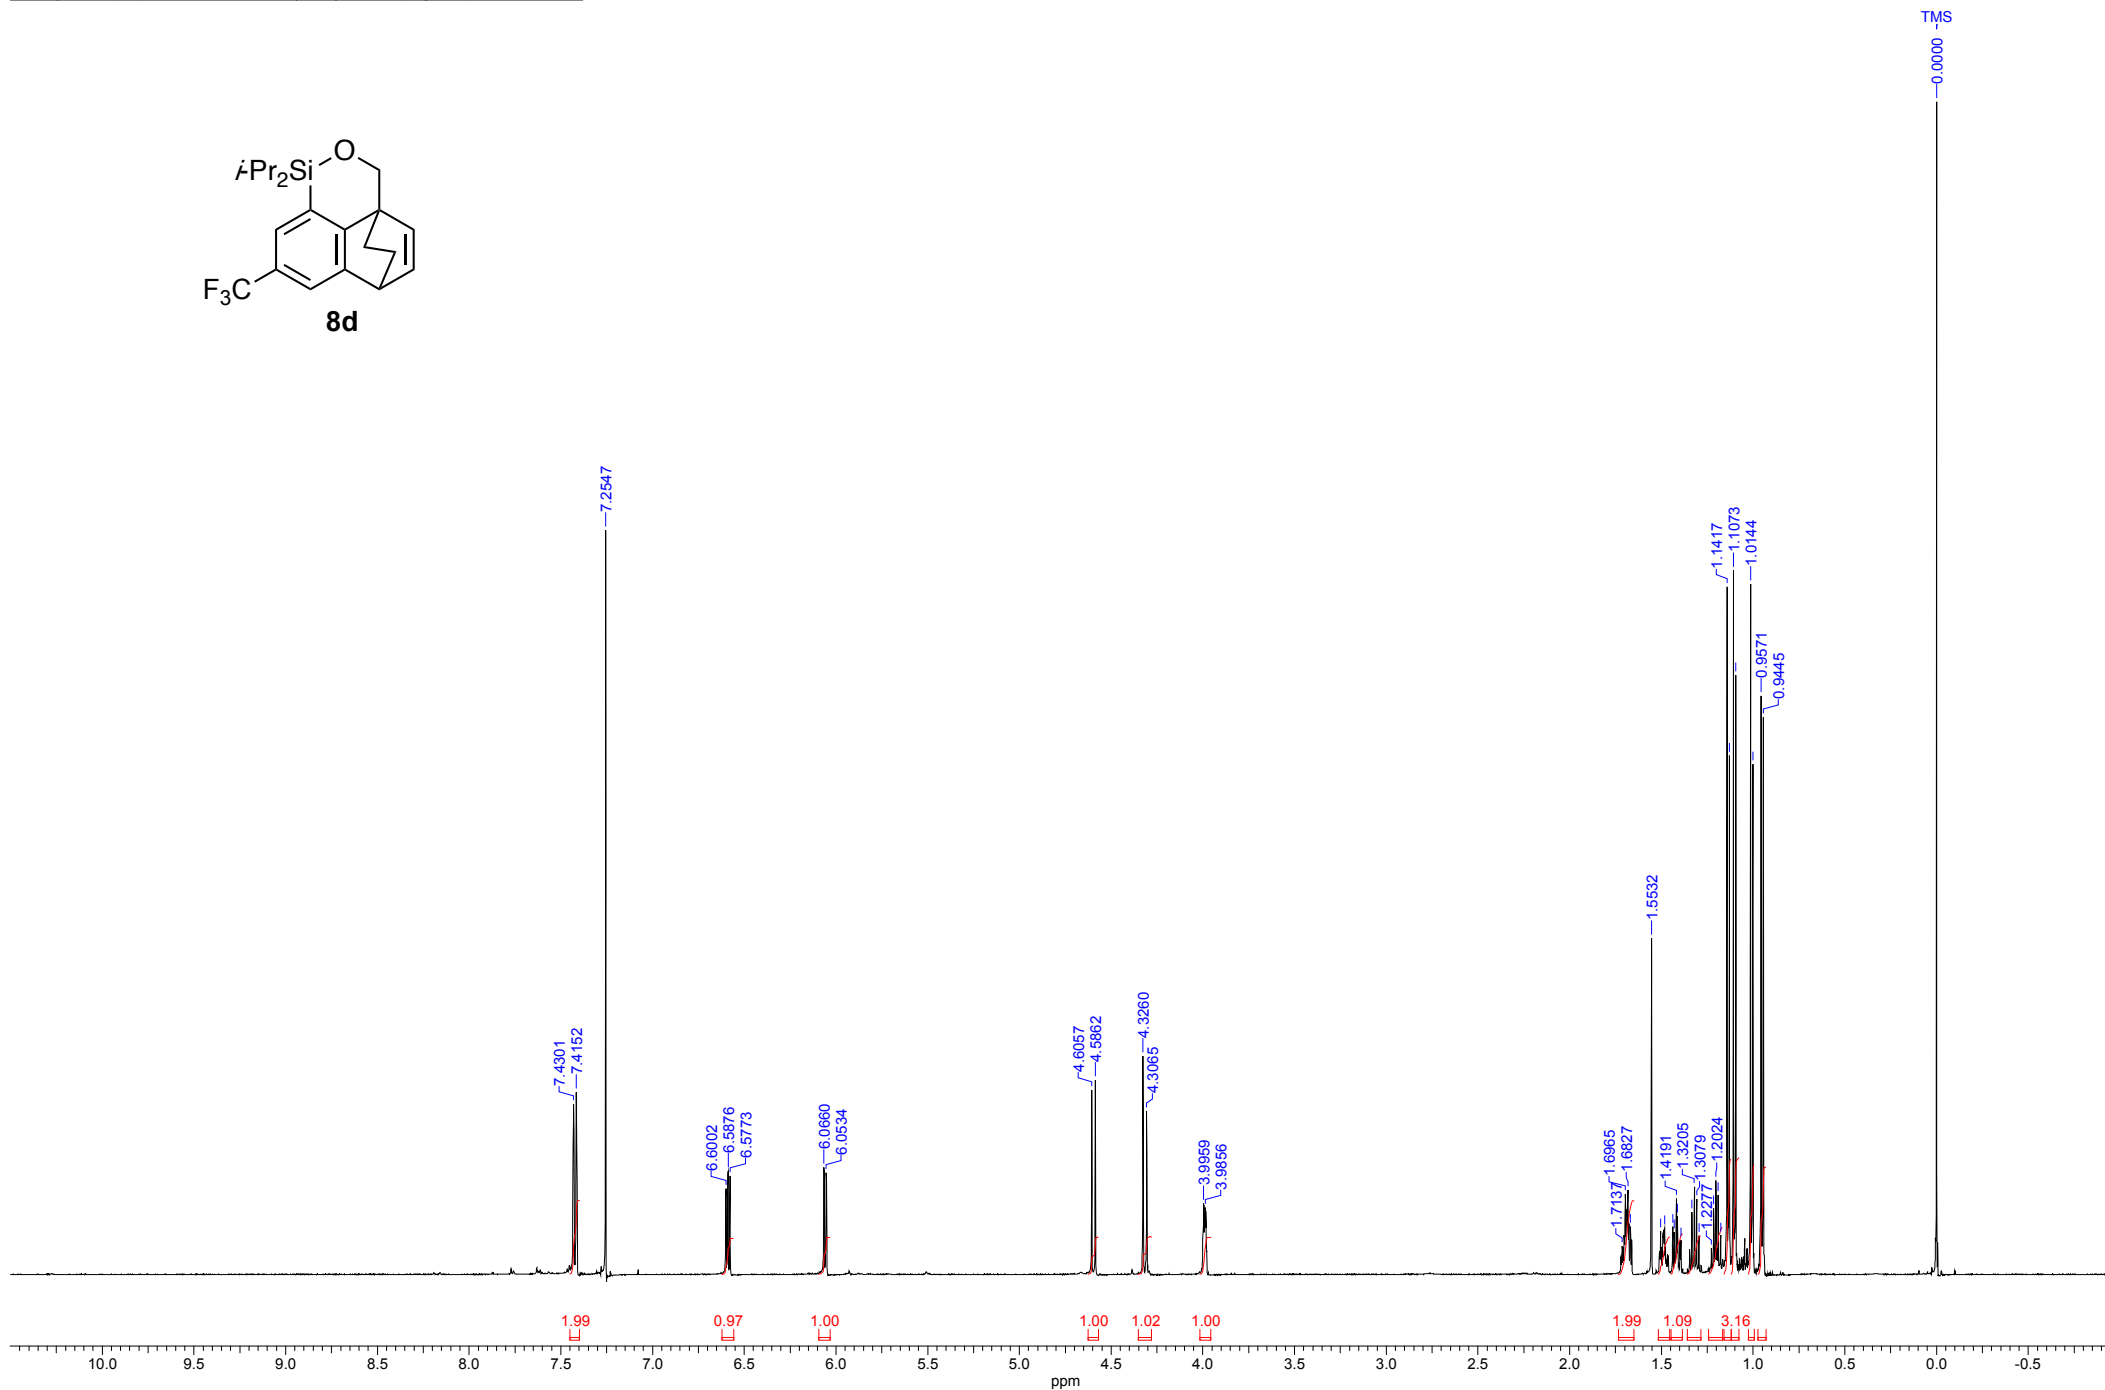



|                        |                                                             |                 |                                  |                      |                      |                        |          |
|------------------------|-------------------------------------------------------------|-----------------|----------------------------------|----------------------|----------------------|------------------------|----------|
| Acquisition Time (sec) | 0.6921                                                      | Comment         | single pulse decoupled gated NOE | Date                 | 26 Apr 2021 14:37:10 |                        |          |
| File Name              | F:\NMR CE t H \tawatar\TT0678-13C-retake carbon copy2-1.als | Frequency (MHz) | 150.00                           | Number of Transients | 53                   | Original Points Count  | 26214    |
| Points Count           | 26214                                                       | Pulse Sequence  | carbon_cool.jp                   | Solvent              | CHLOROFORM-D         | Sweep Width (Hz)       | 37876.77 |
|                        |                                                             |                 |                                  |                      |                      | Temperature (degree C) | 20.700   |

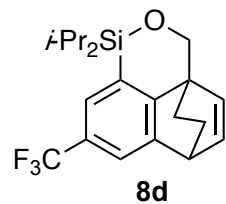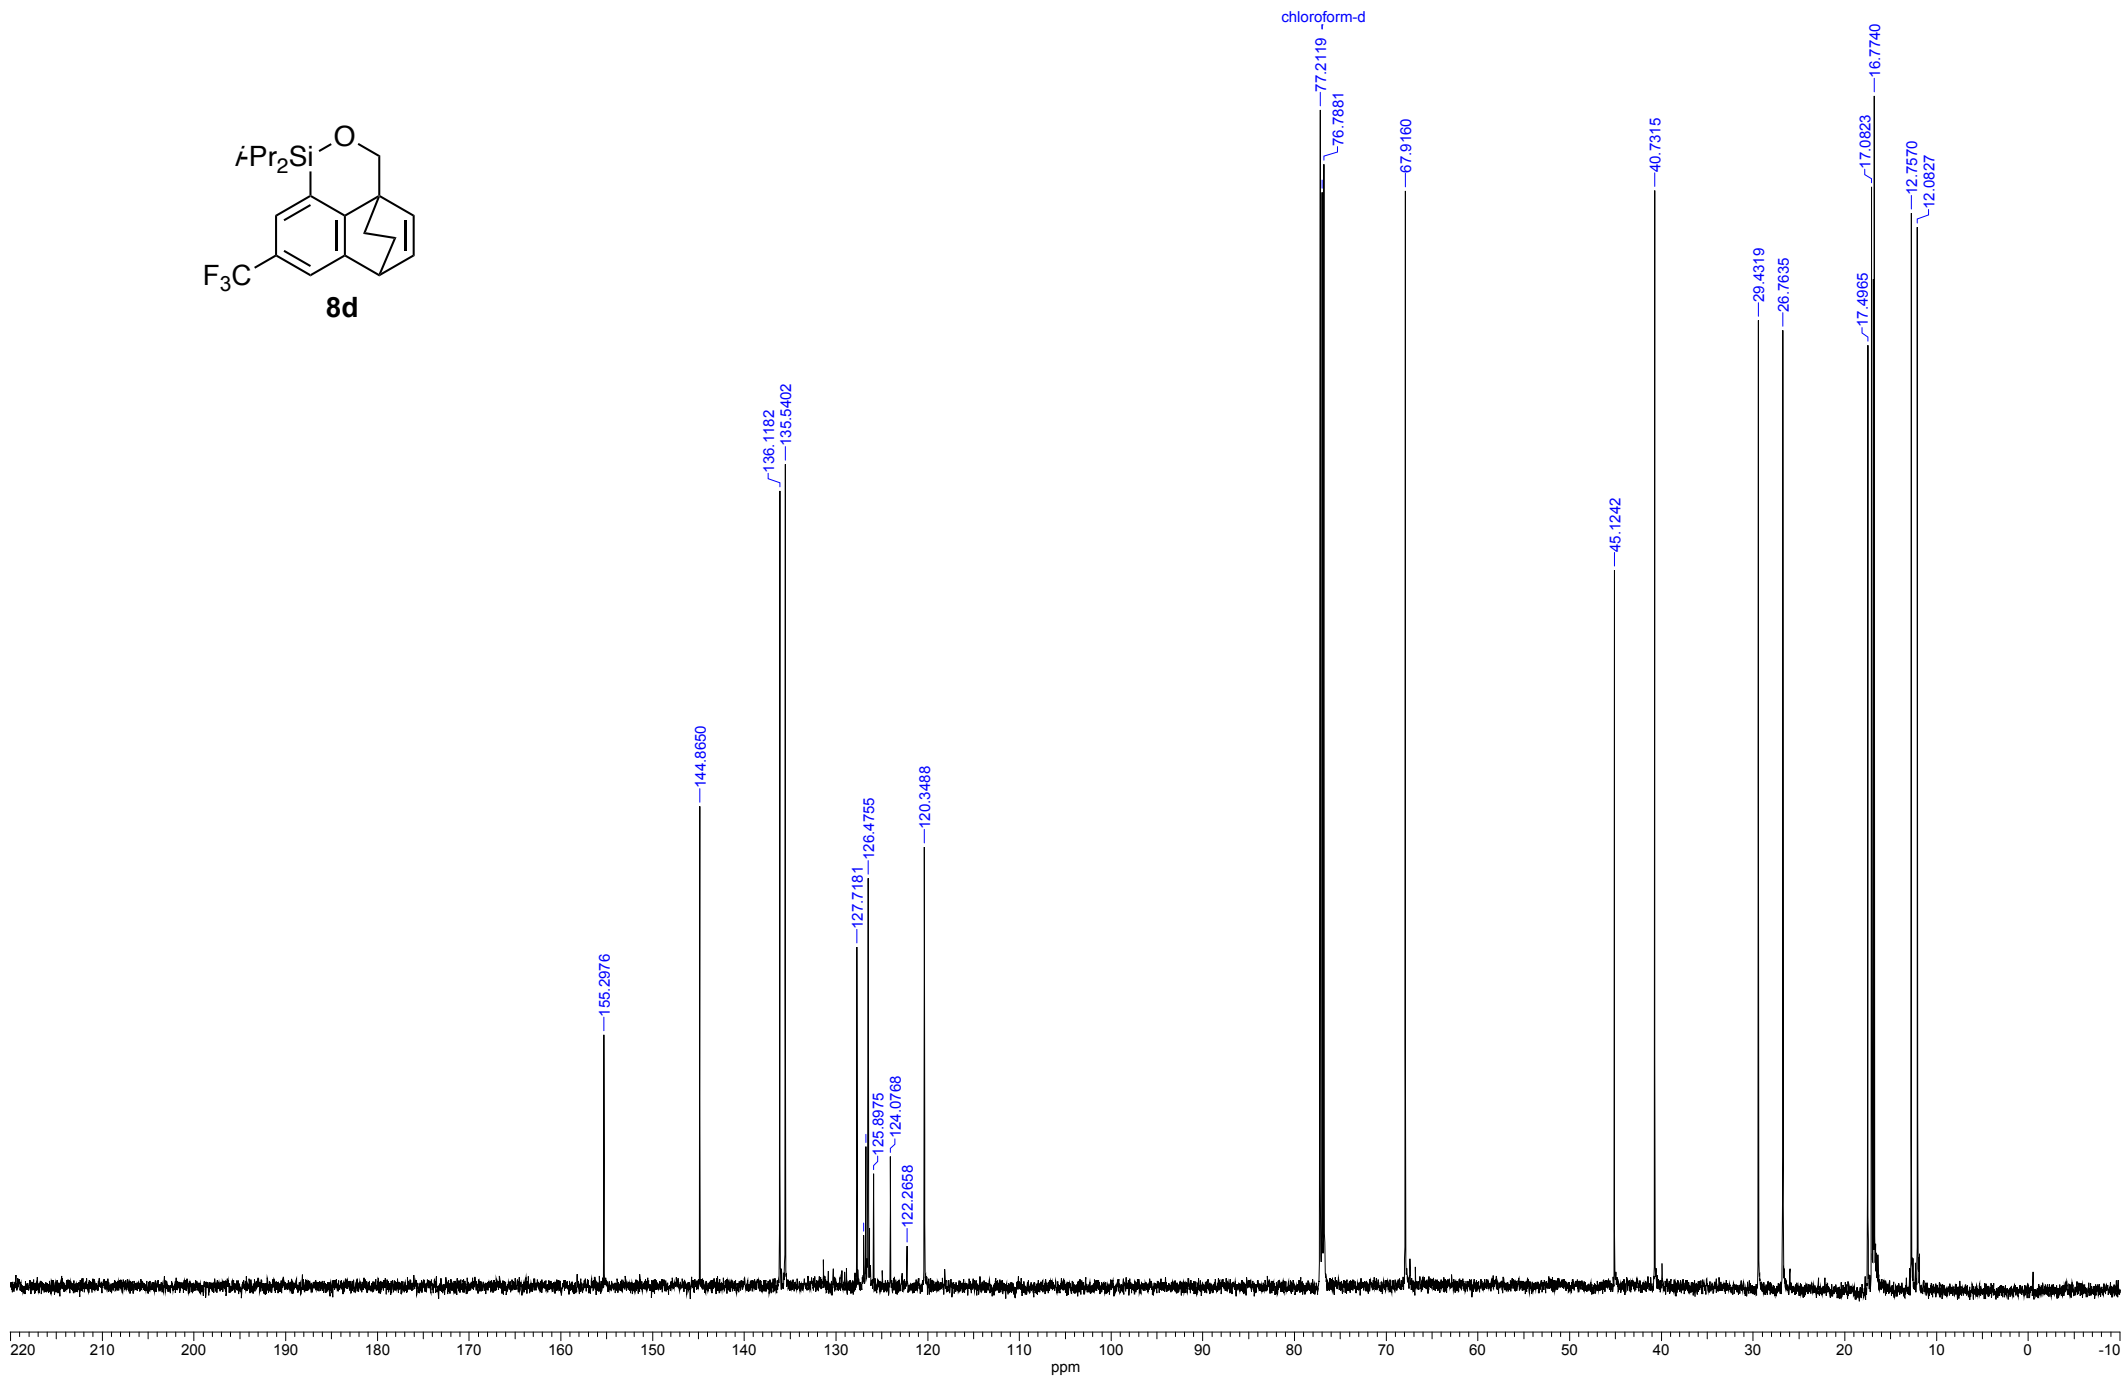

|                        |         |                        |              |                      |                      |                       |                                                  |
|------------------------|---------|------------------------|--------------|----------------------|----------------------|-----------------------|--------------------------------------------------|
| Acquisition Time (sec) | 1.8153  | Comment                | single pulse | Date                 | 17 Dec 2020 11:28:24 | File Name             | F:\NMR CE t H \tawatari\TT0666-1H_proton-1-1.als |
| Frequency (MHz)        | 600.17  | Nucleus                | 1H           | Number of Transients | 8                    | Original Points Count | 16384                                            |
| Sweep Width (Hz)       | 9025.27 | Temperature (degree C) | 19.300       | Points Count         | 13120                | Pulse Sequence        | proton.jxp                                       |
|                        |         |                        |              |                      |                      | Solvent               | CHLOROFORM-D                                     |

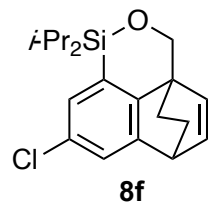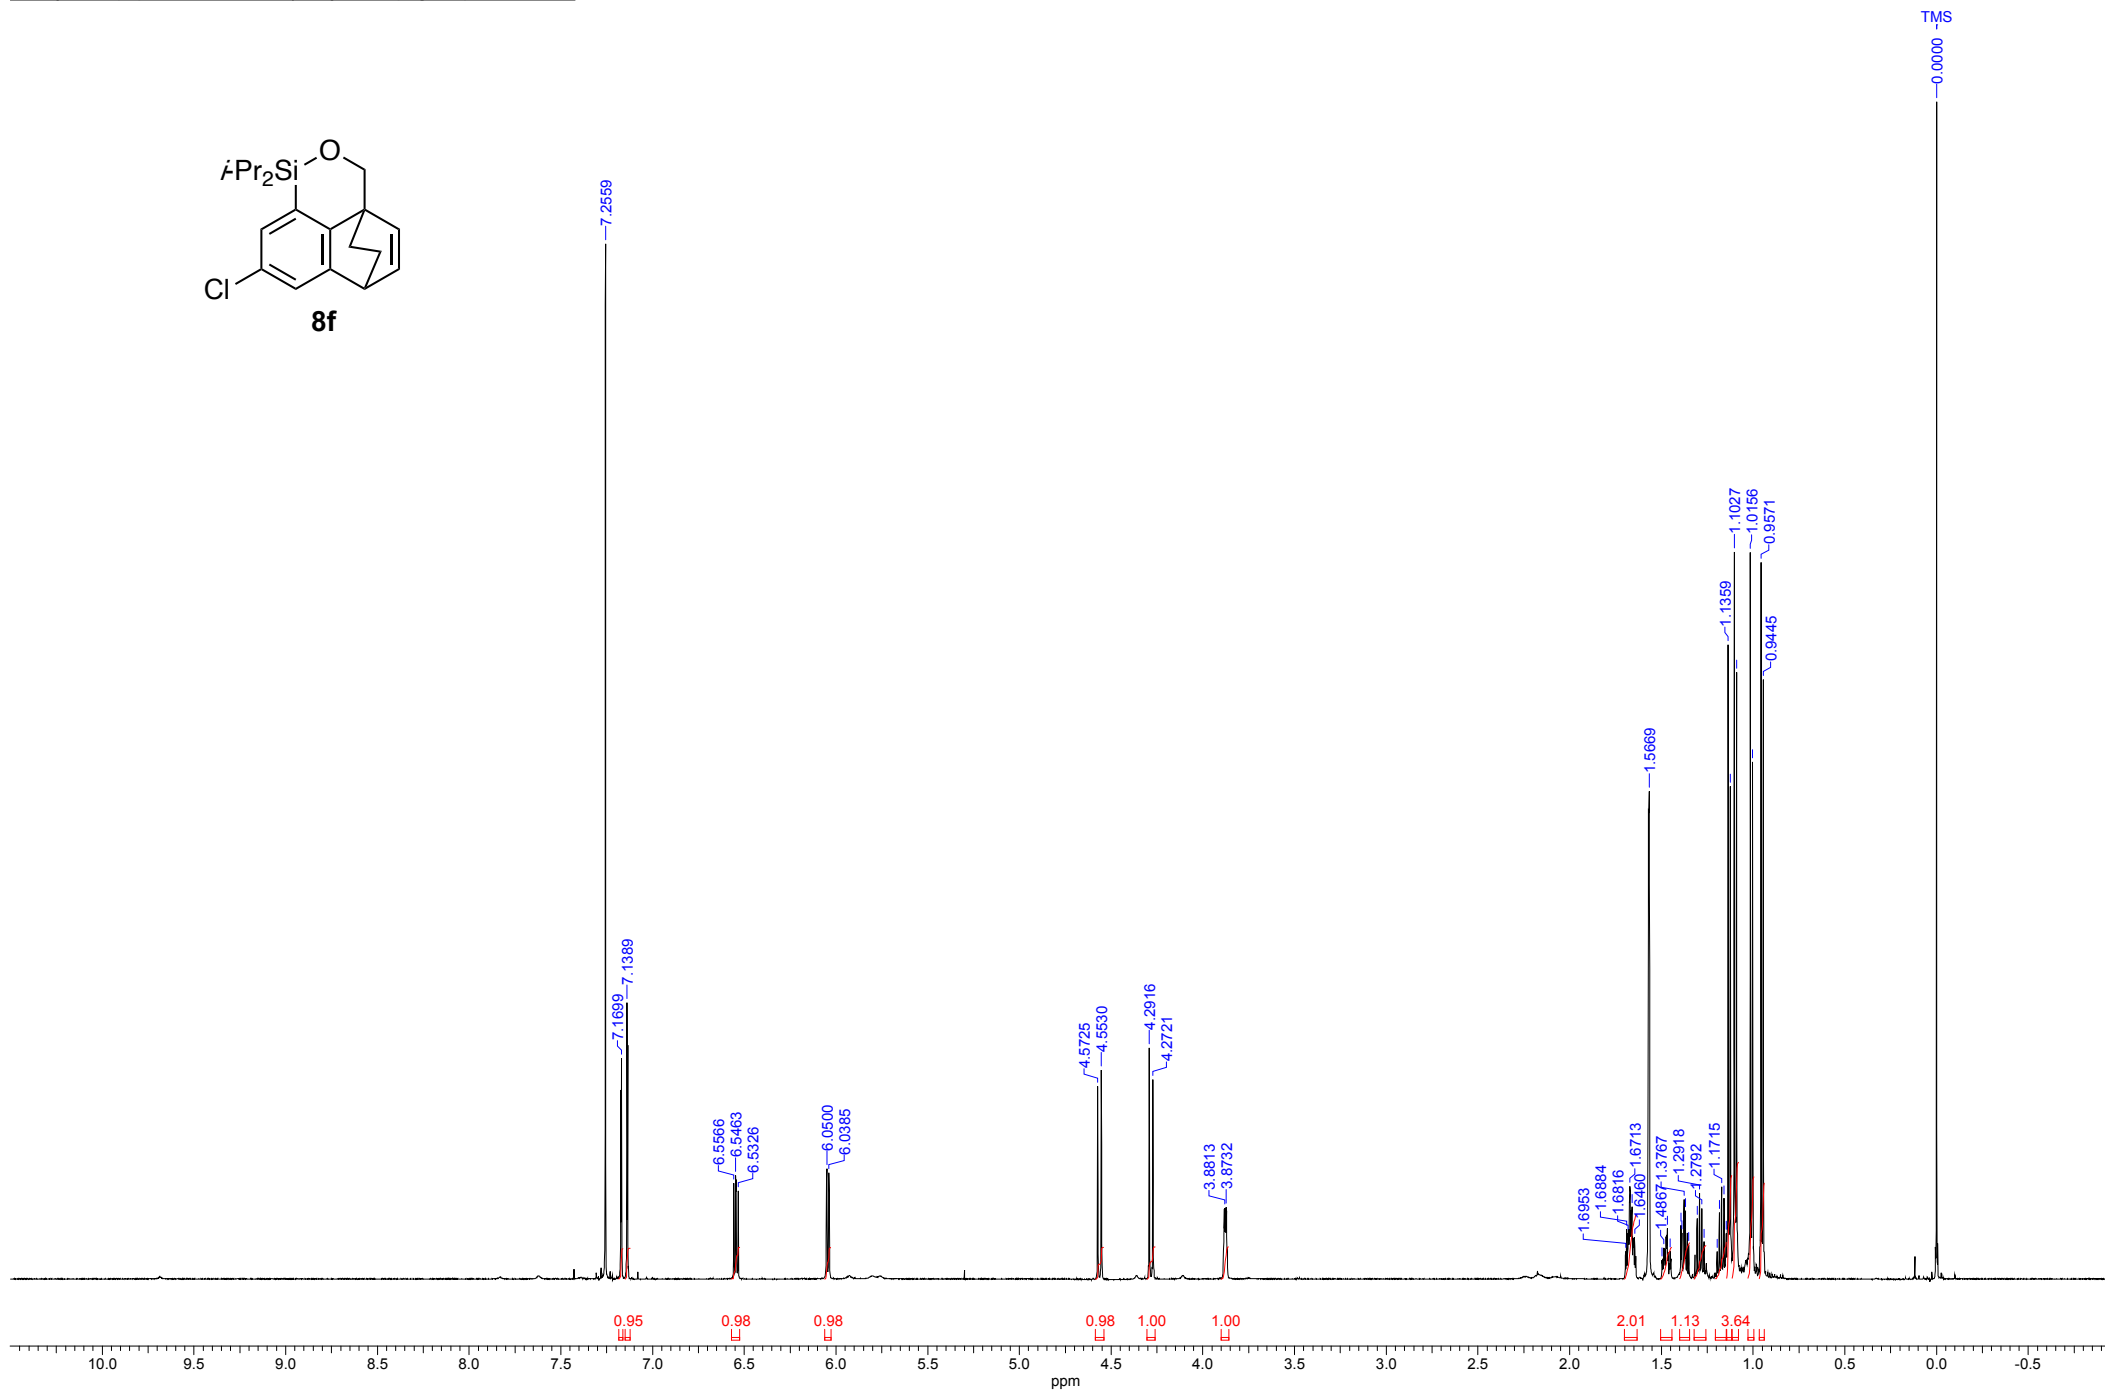

|                        |          |                        |                                  |                       |                      |              |                                                |
|------------------------|----------|------------------------|----------------------------------|-----------------------|----------------------|--------------|------------------------------------------------|
| Acquisition Time (sec) | 0.6921   | Comment                | single pulse decoupled gated NOE | Date                  | 17 Dec 2020 11:27:46 | File Name    | F:\NMR_CE_t_H\tawatari\TT0666-13C_carbon-1.als |
| Frequency (MHz)        | 150.00   | Number of Transients   | 256                              | Original Points Count | 26214                | Points Count | 26214                                          |
| Sweep Width (Hz)       | 37876.77 | Temperature (degree C) | 19.300                           | Pulse Sequence        | carbon_cool.jxp      | Solvent      | CHLOROFORM-D                                   |

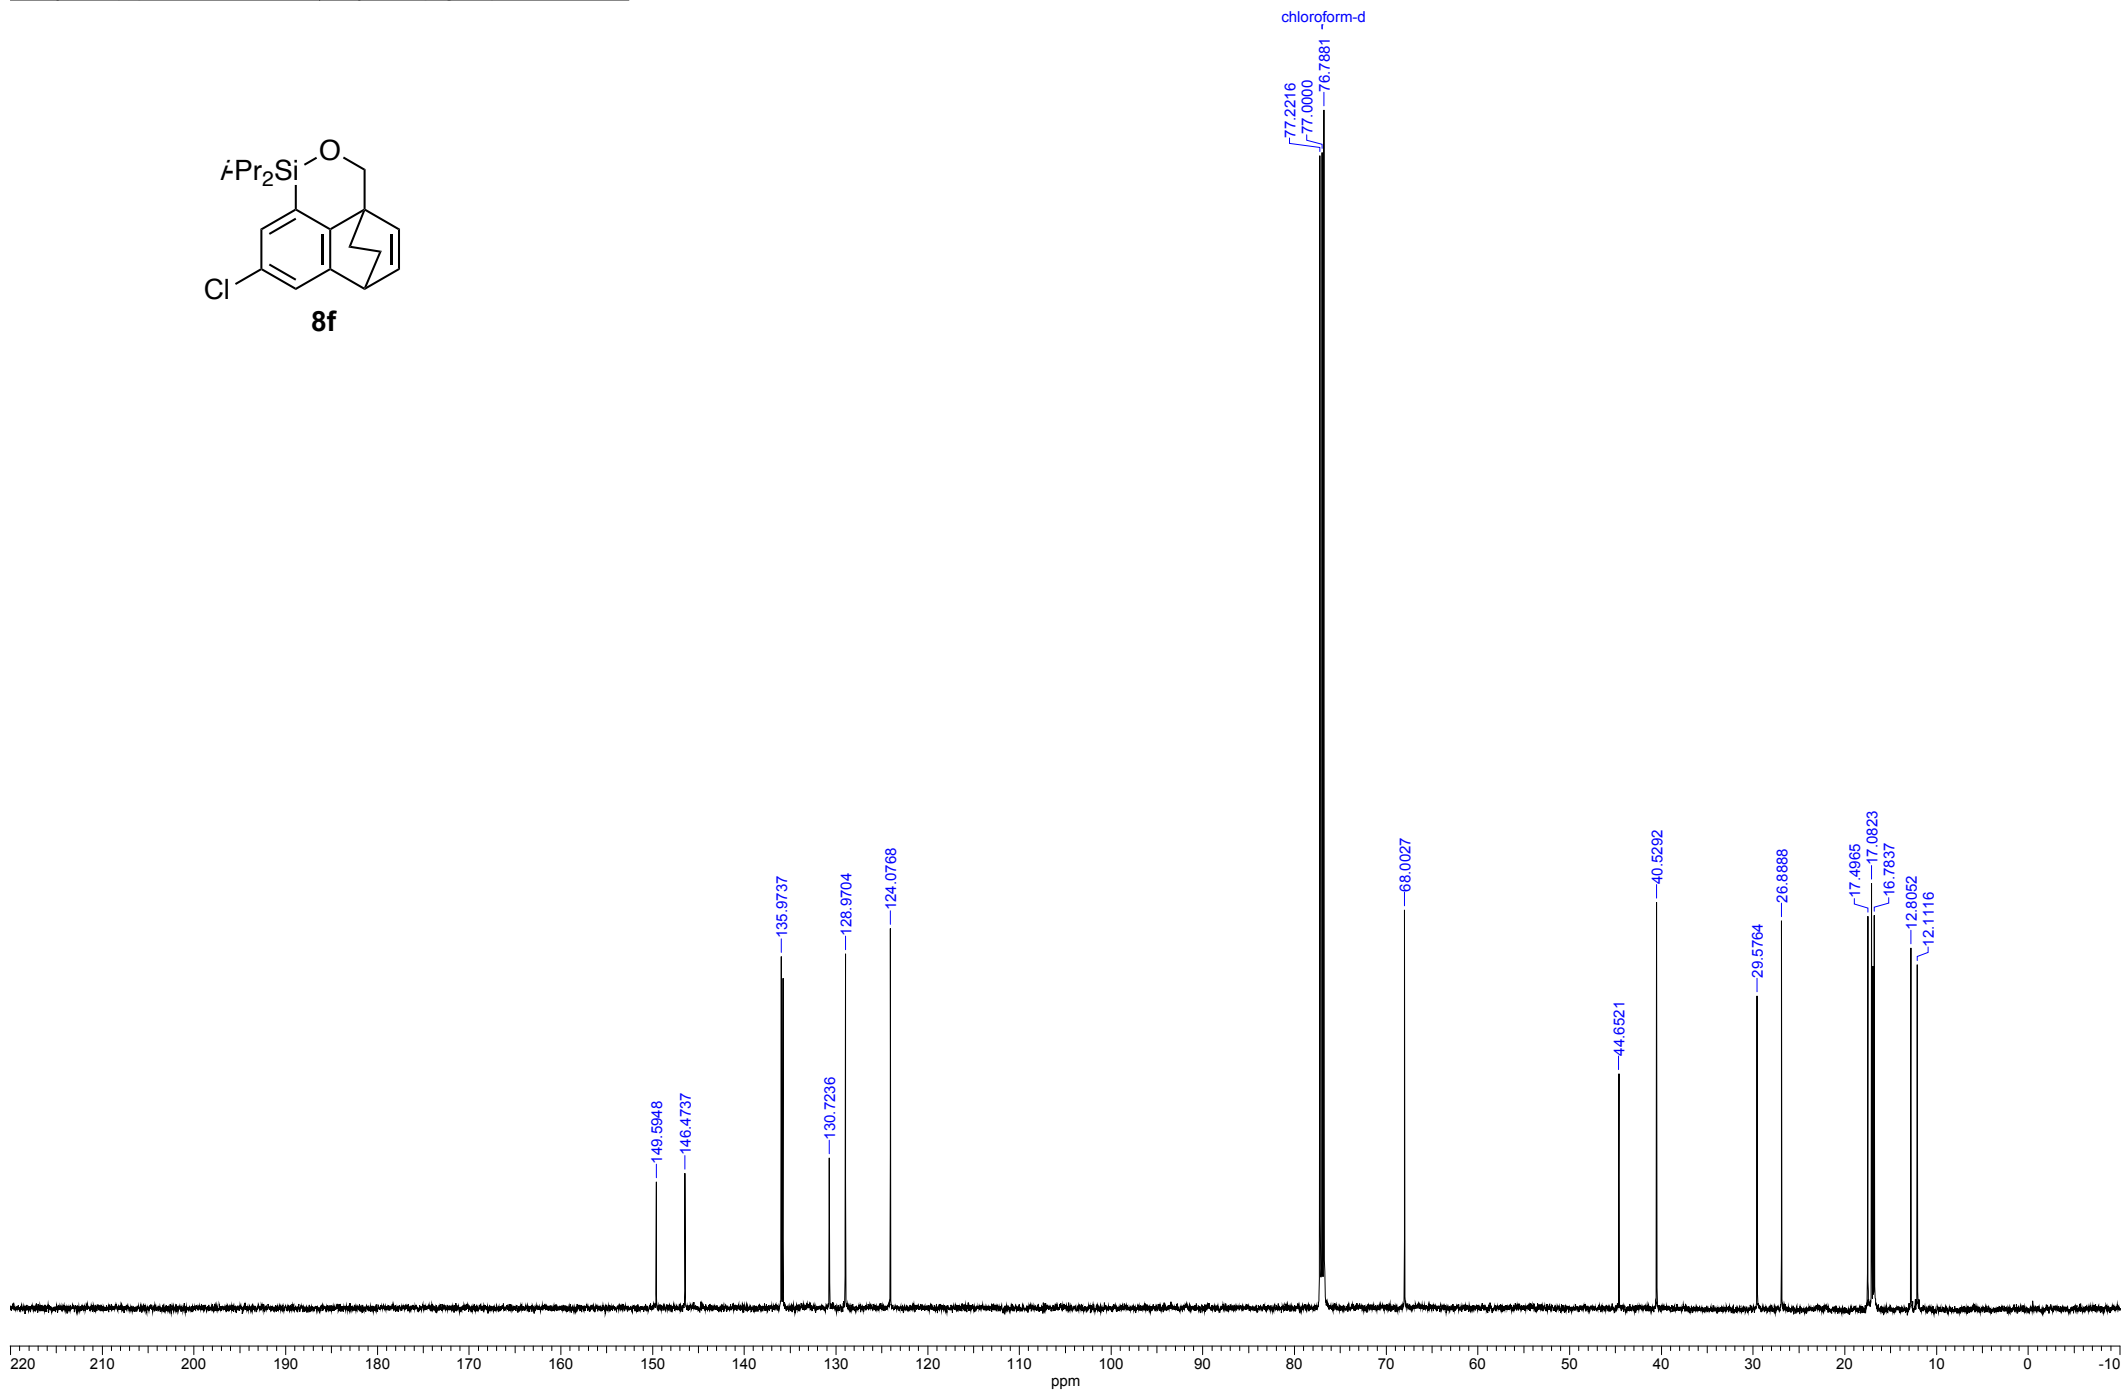

|                        |         |                        |              |                       |                      |              |                                               |                 |            |         |              |
|------------------------|---------|------------------------|--------------|-----------------------|----------------------|--------------|-----------------------------------------------|-----------------|------------|---------|--------------|
| Acquisition Time (sec) | 1.8153  | Comment                | single pulse | Date                  | 15 Dec 2020 00:10:56 | File Name    | F:\NMR CE t H \tawatari\TT0664 proton-1-1.als | Frequency (MHz) | 600.17     |         |              |
| Nucleus                | 1H      | Number of Transients   | 8            | Original Points Count | 16384                | Points Count | 13120                                         | Pulse Sequence  | proton.jxp | Solvent | CHLOROFORM-D |
| Sweep Width (Hz)       | 9025.27 | Temperature (degree C) | 19.800       |                       |                      |              |                                               |                 |            |         |              |

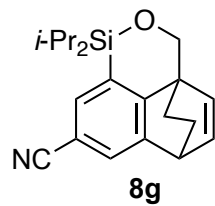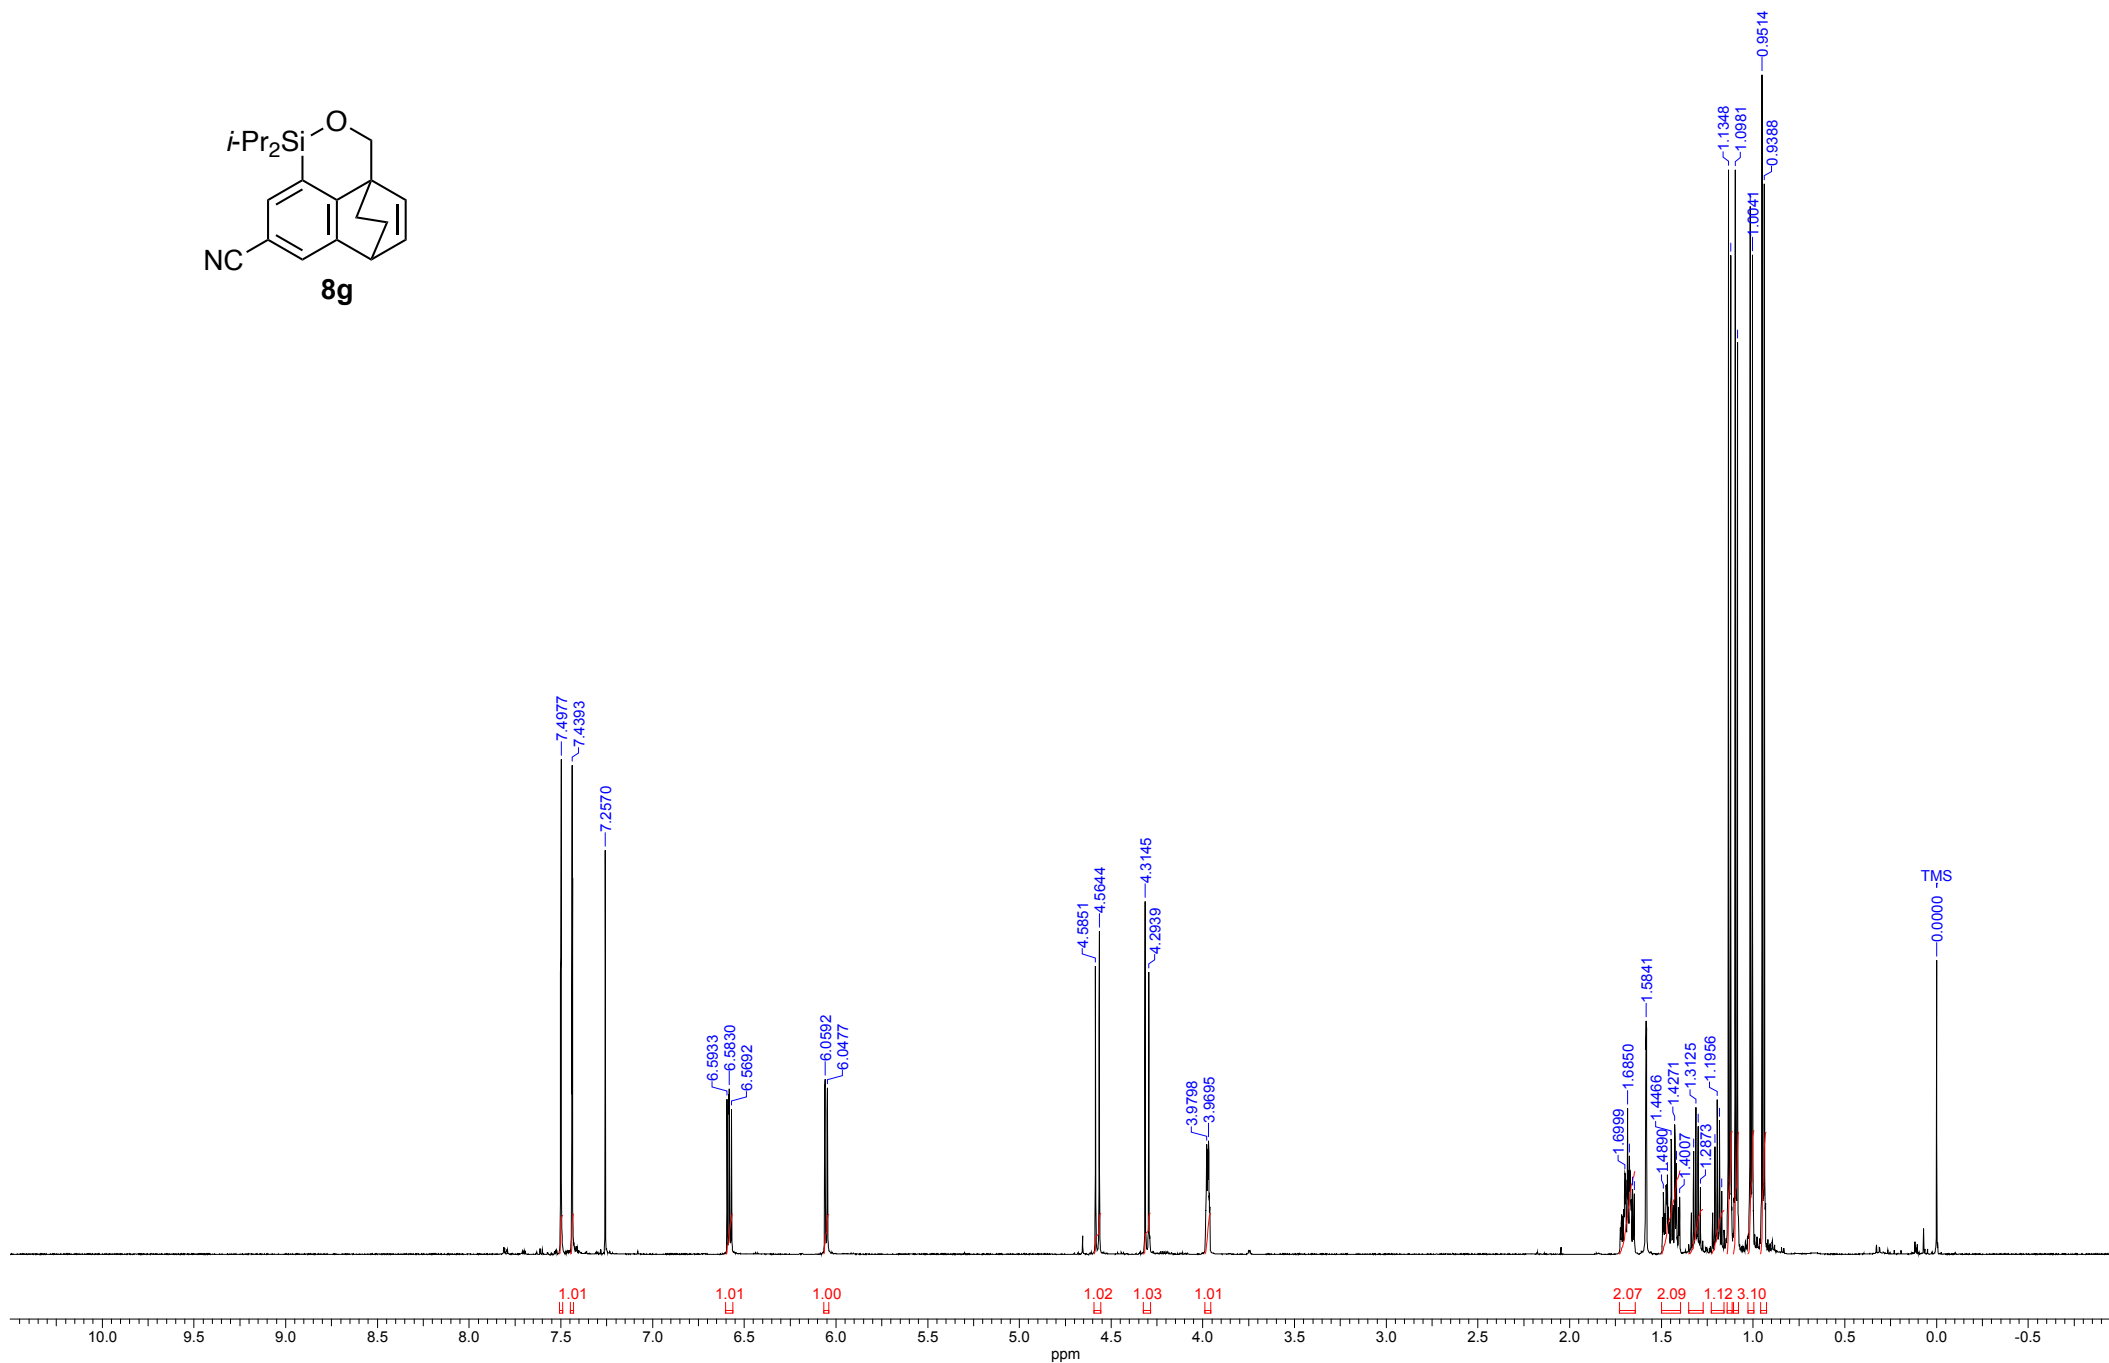

|                        |          |                        |                                  |                       |                      |              |                                             |
|------------------------|----------|------------------------|----------------------------------|-----------------------|----------------------|--------------|---------------------------------------------|
| Acquisition Time (sec) | 0.6921   | Comment                | single pulse decoupled gated NOE | Date                  | 15 Dec 2020 00:10:24 | File Name    | F:\NMR CE t H \tawatari\TT0664 carbon-1.als |
| Frequency (MHz)        | 150.00   | Number of Transients   | 1024                             | Original Points Count | 26214                | Points Count | 26214                                       |
| Sweep Width (Hz)       | 37876.77 | Temperature (degree C) | 20.300                           | Pulse Sequence        | carbon_cool.jxp      | Solvent      | CHLOROFORM-D                                |

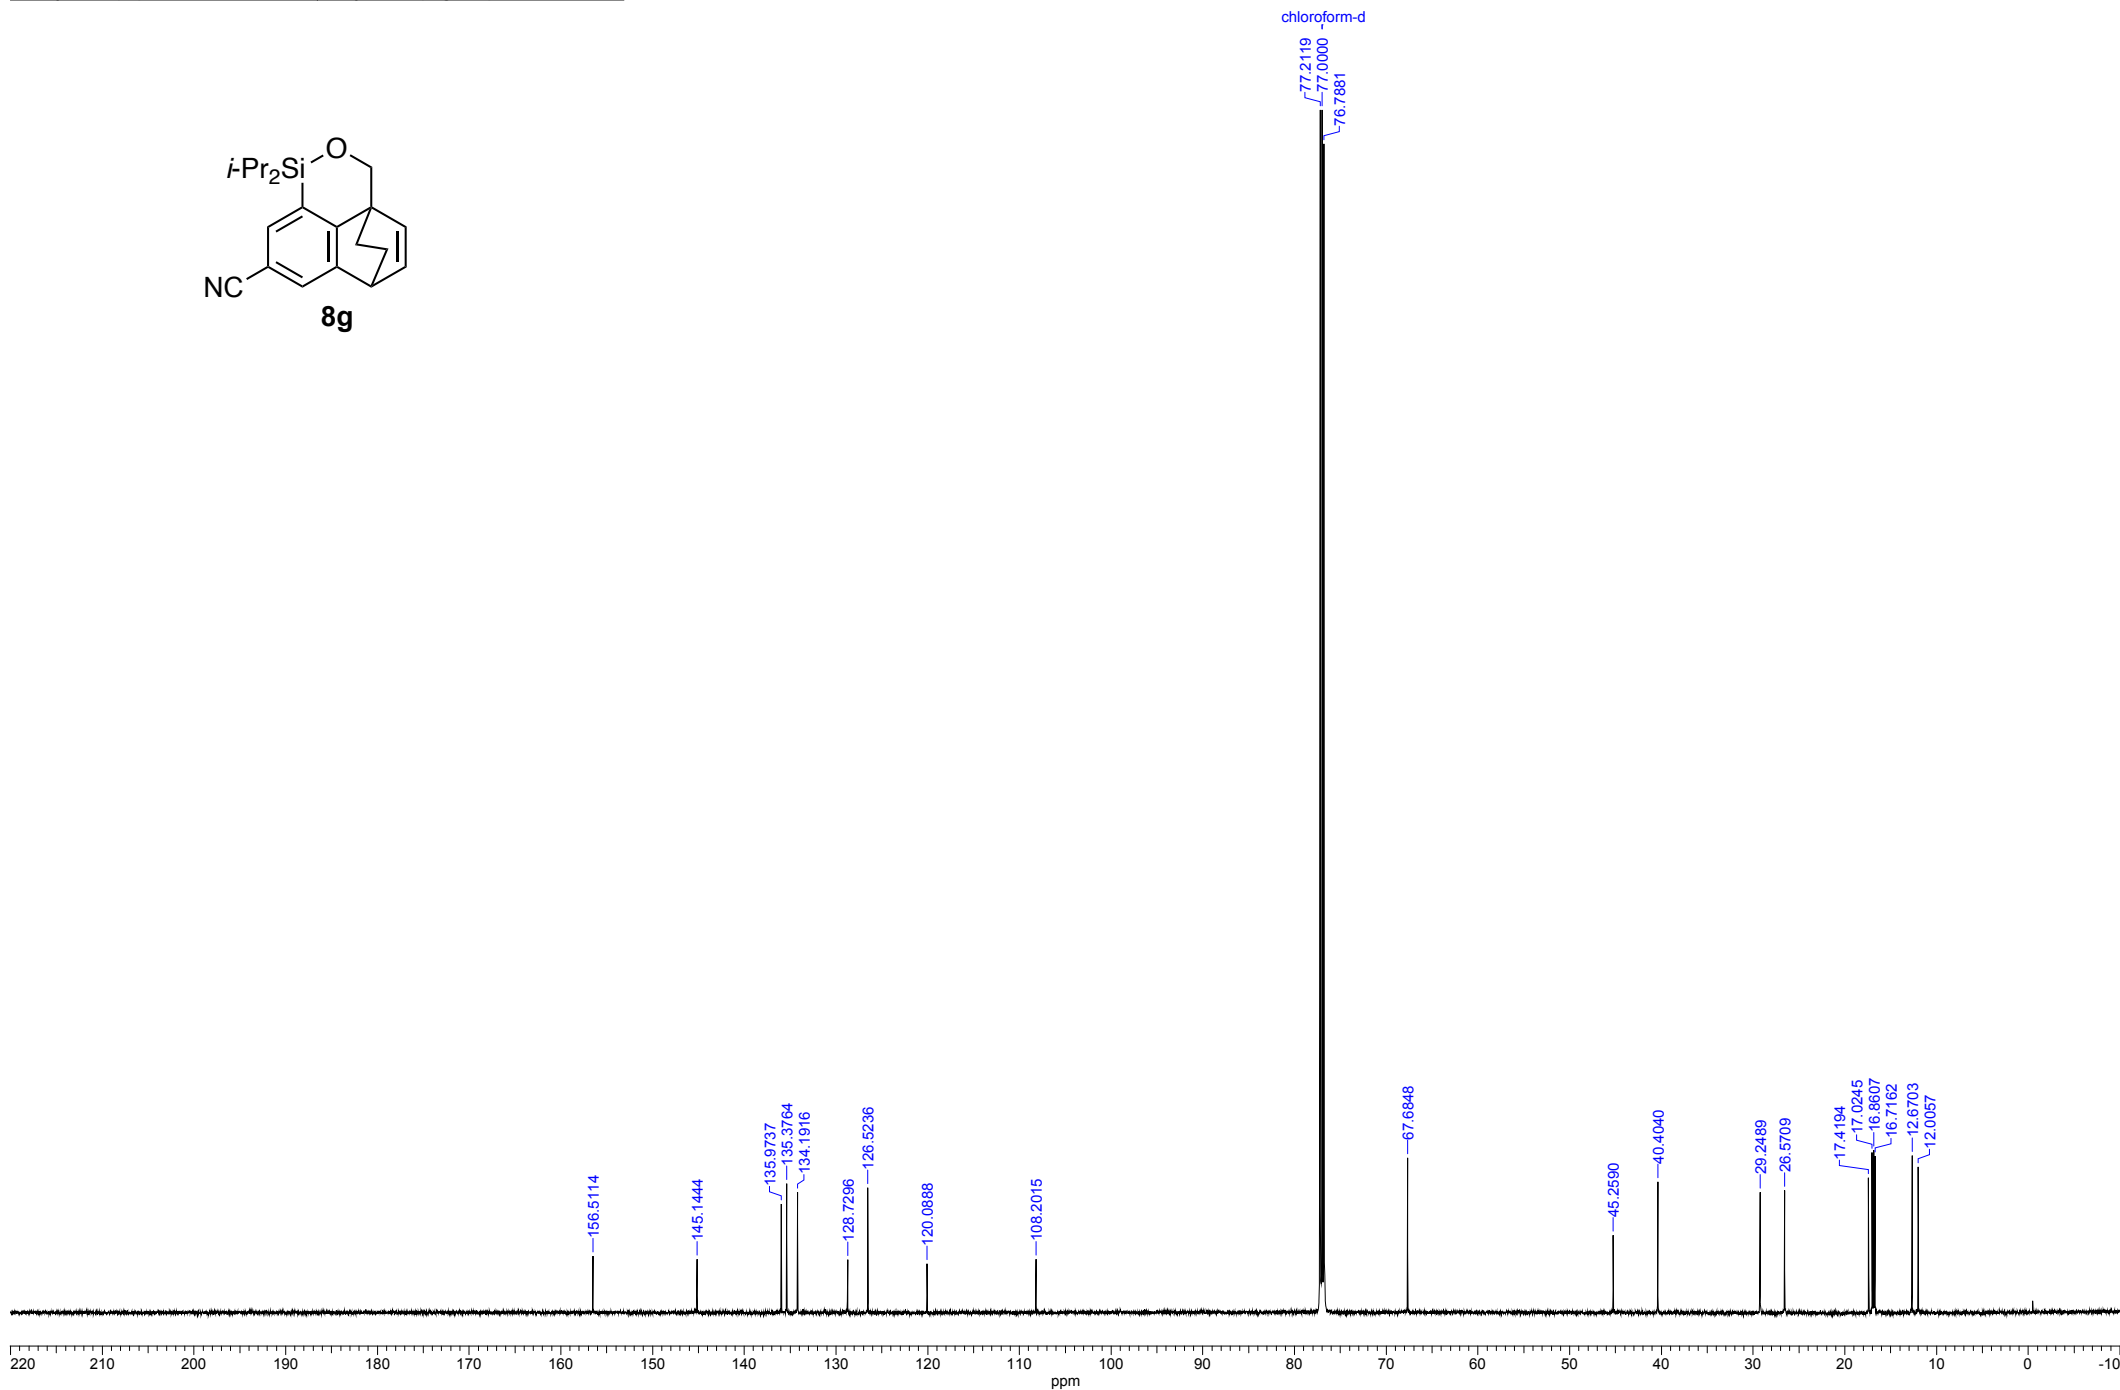

|                        |         |                        |              |                      |                      |                       |                                                        |
|------------------------|---------|------------------------|--------------|----------------------|----------------------|-----------------------|--------------------------------------------------------|
| Acquisition Time (sec) | 1.8153  | Comment                | single_pulse | Date                 | 16 Dec 2020 19:28:54 | File Name             | F:\NMR CE t H \tawatar\TT0554-1H-retake_proton-1-1.als |
| Frequency (MHz)        | 600.17  | Nucleus                | 1H           | Number of Transients | 8                    | Original Points Count | 16384                                                  |
| Sweep Width (Hz)       | 9025.27 | Temperature (degree C) | 21.300       | Points Count         |                      | Pulse Sequence        | proton.jp                                              |
|                        |         |                        |              |                      |                      | Solvent               | CHLOROFORM-D                                           |

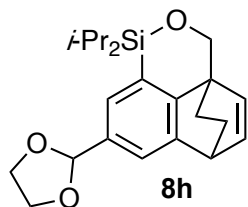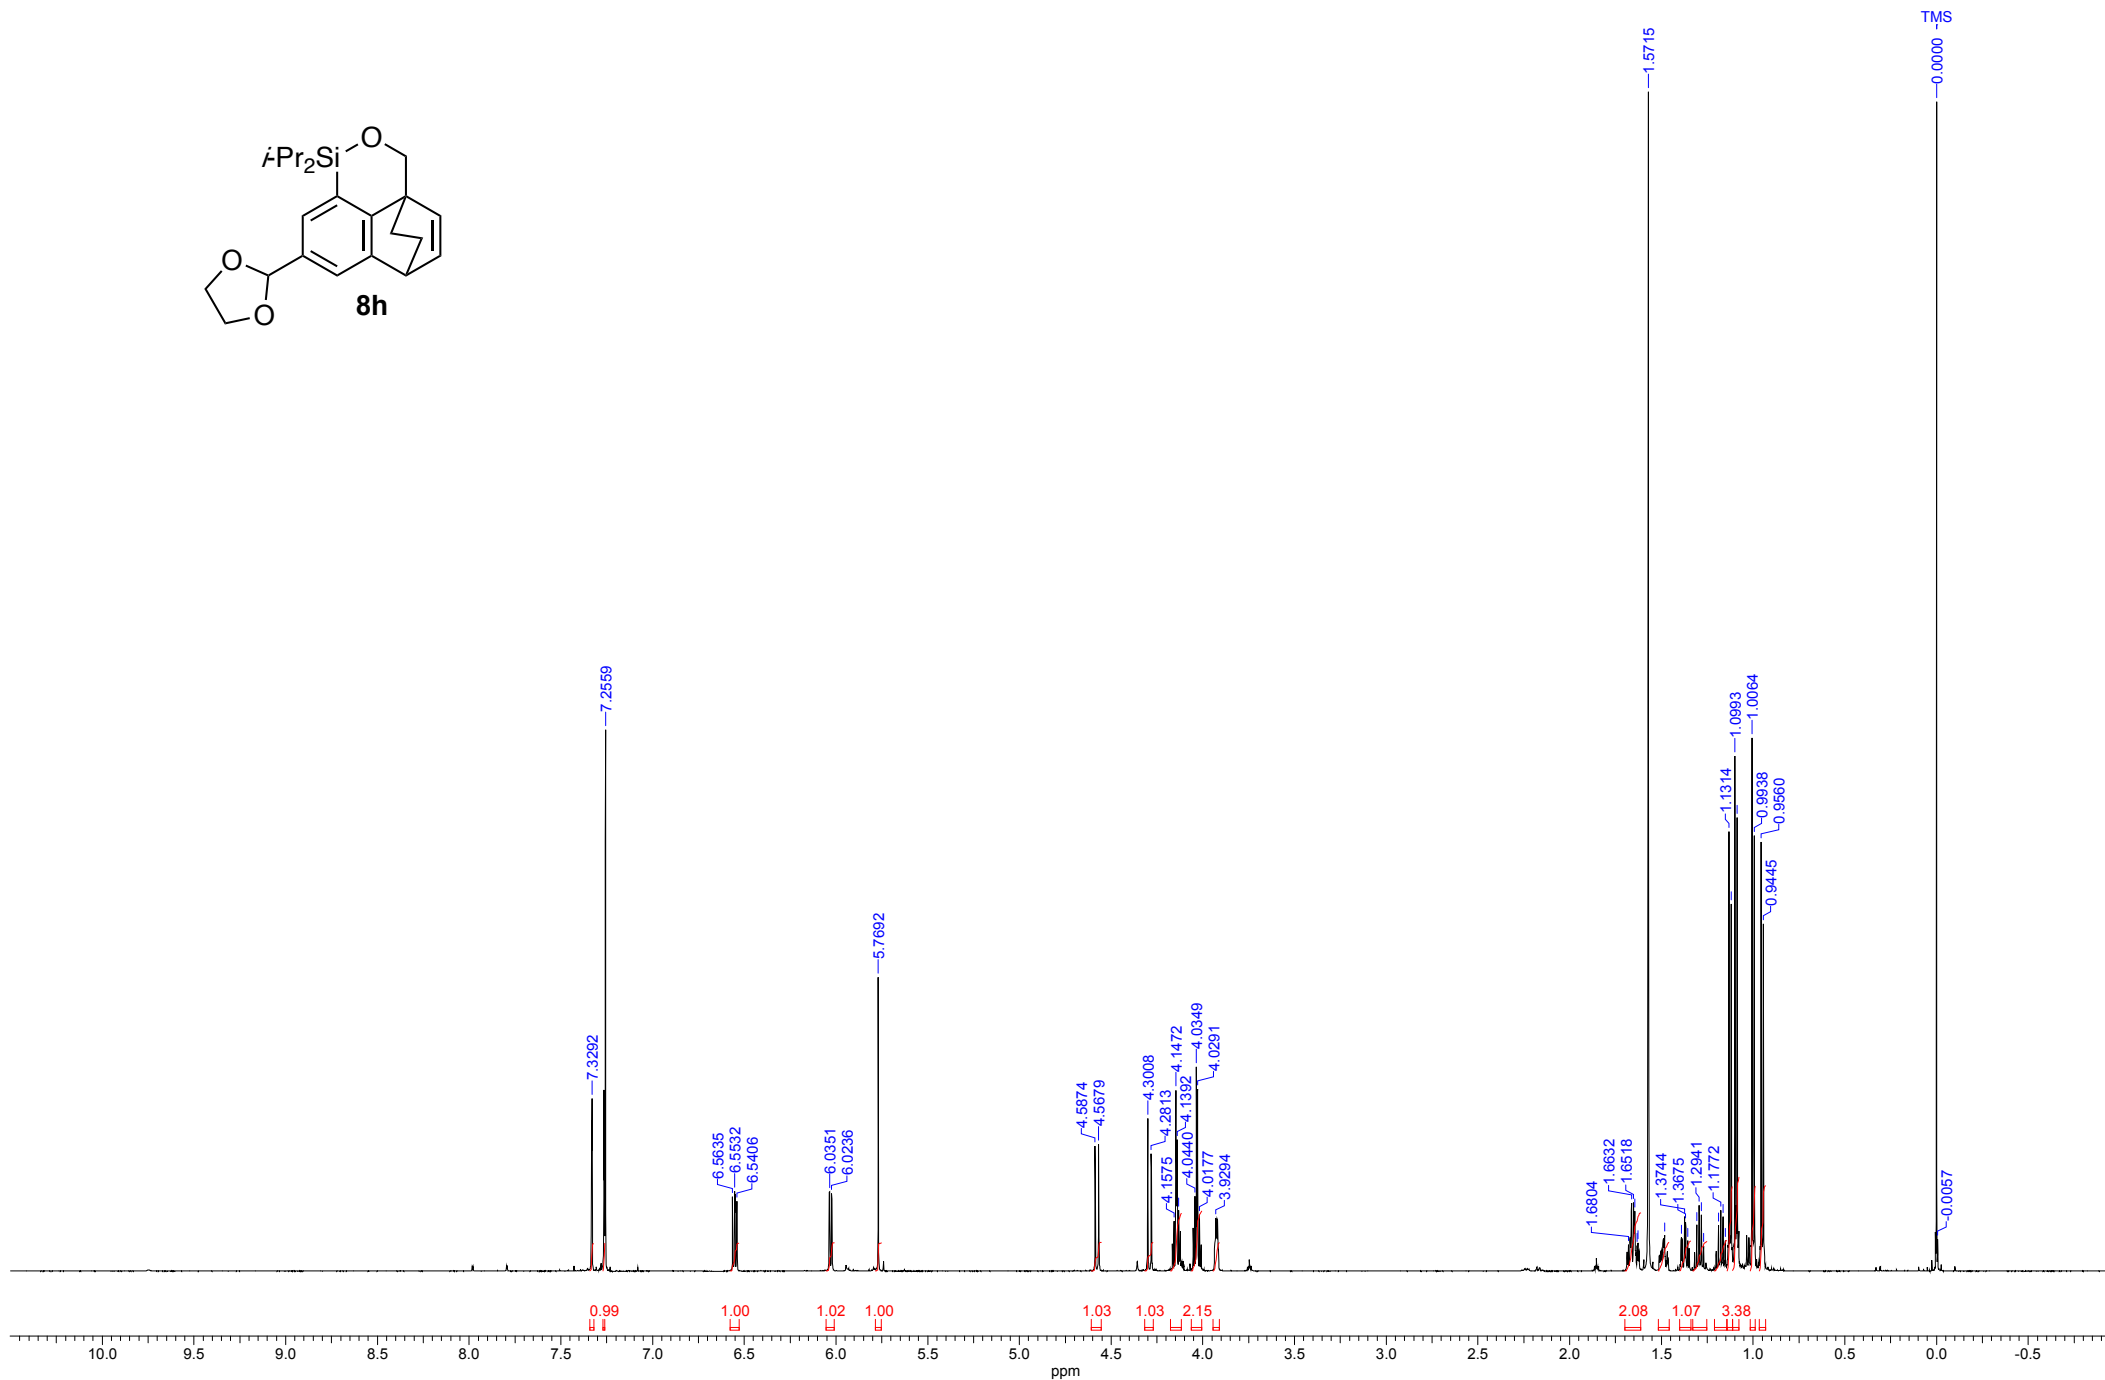

|                        |                                                        |                  |                                  |                        |                      |
|------------------------|--------------------------------------------------------|------------------|----------------------------------|------------------------|----------------------|
| Acquisition Time (sec) | 0.6921                                                 | Comment          | single pulse decoupled gated NOE | Date                   | 11 Sep 2020 00:51:20 |
| File Name              | F:\NMR CE t H \tawatar\TT0554-13C-retake2_carbon-1.als | Frequency (MHz)  | 150.00                           | Number of Transients   | 351                  |
| Pulse Sequence         | carbon_cool.jxp                                        | Solvent          | CHLOROFORM-D                     | Original Points Count  | 26214                |
|                        |                                                        | Sweep Width (Hz) | 37876.77                         | Temperature (degree C) | 21.400               |
|                        |                                                        |                  |                                  | Points Count           | 26214                |

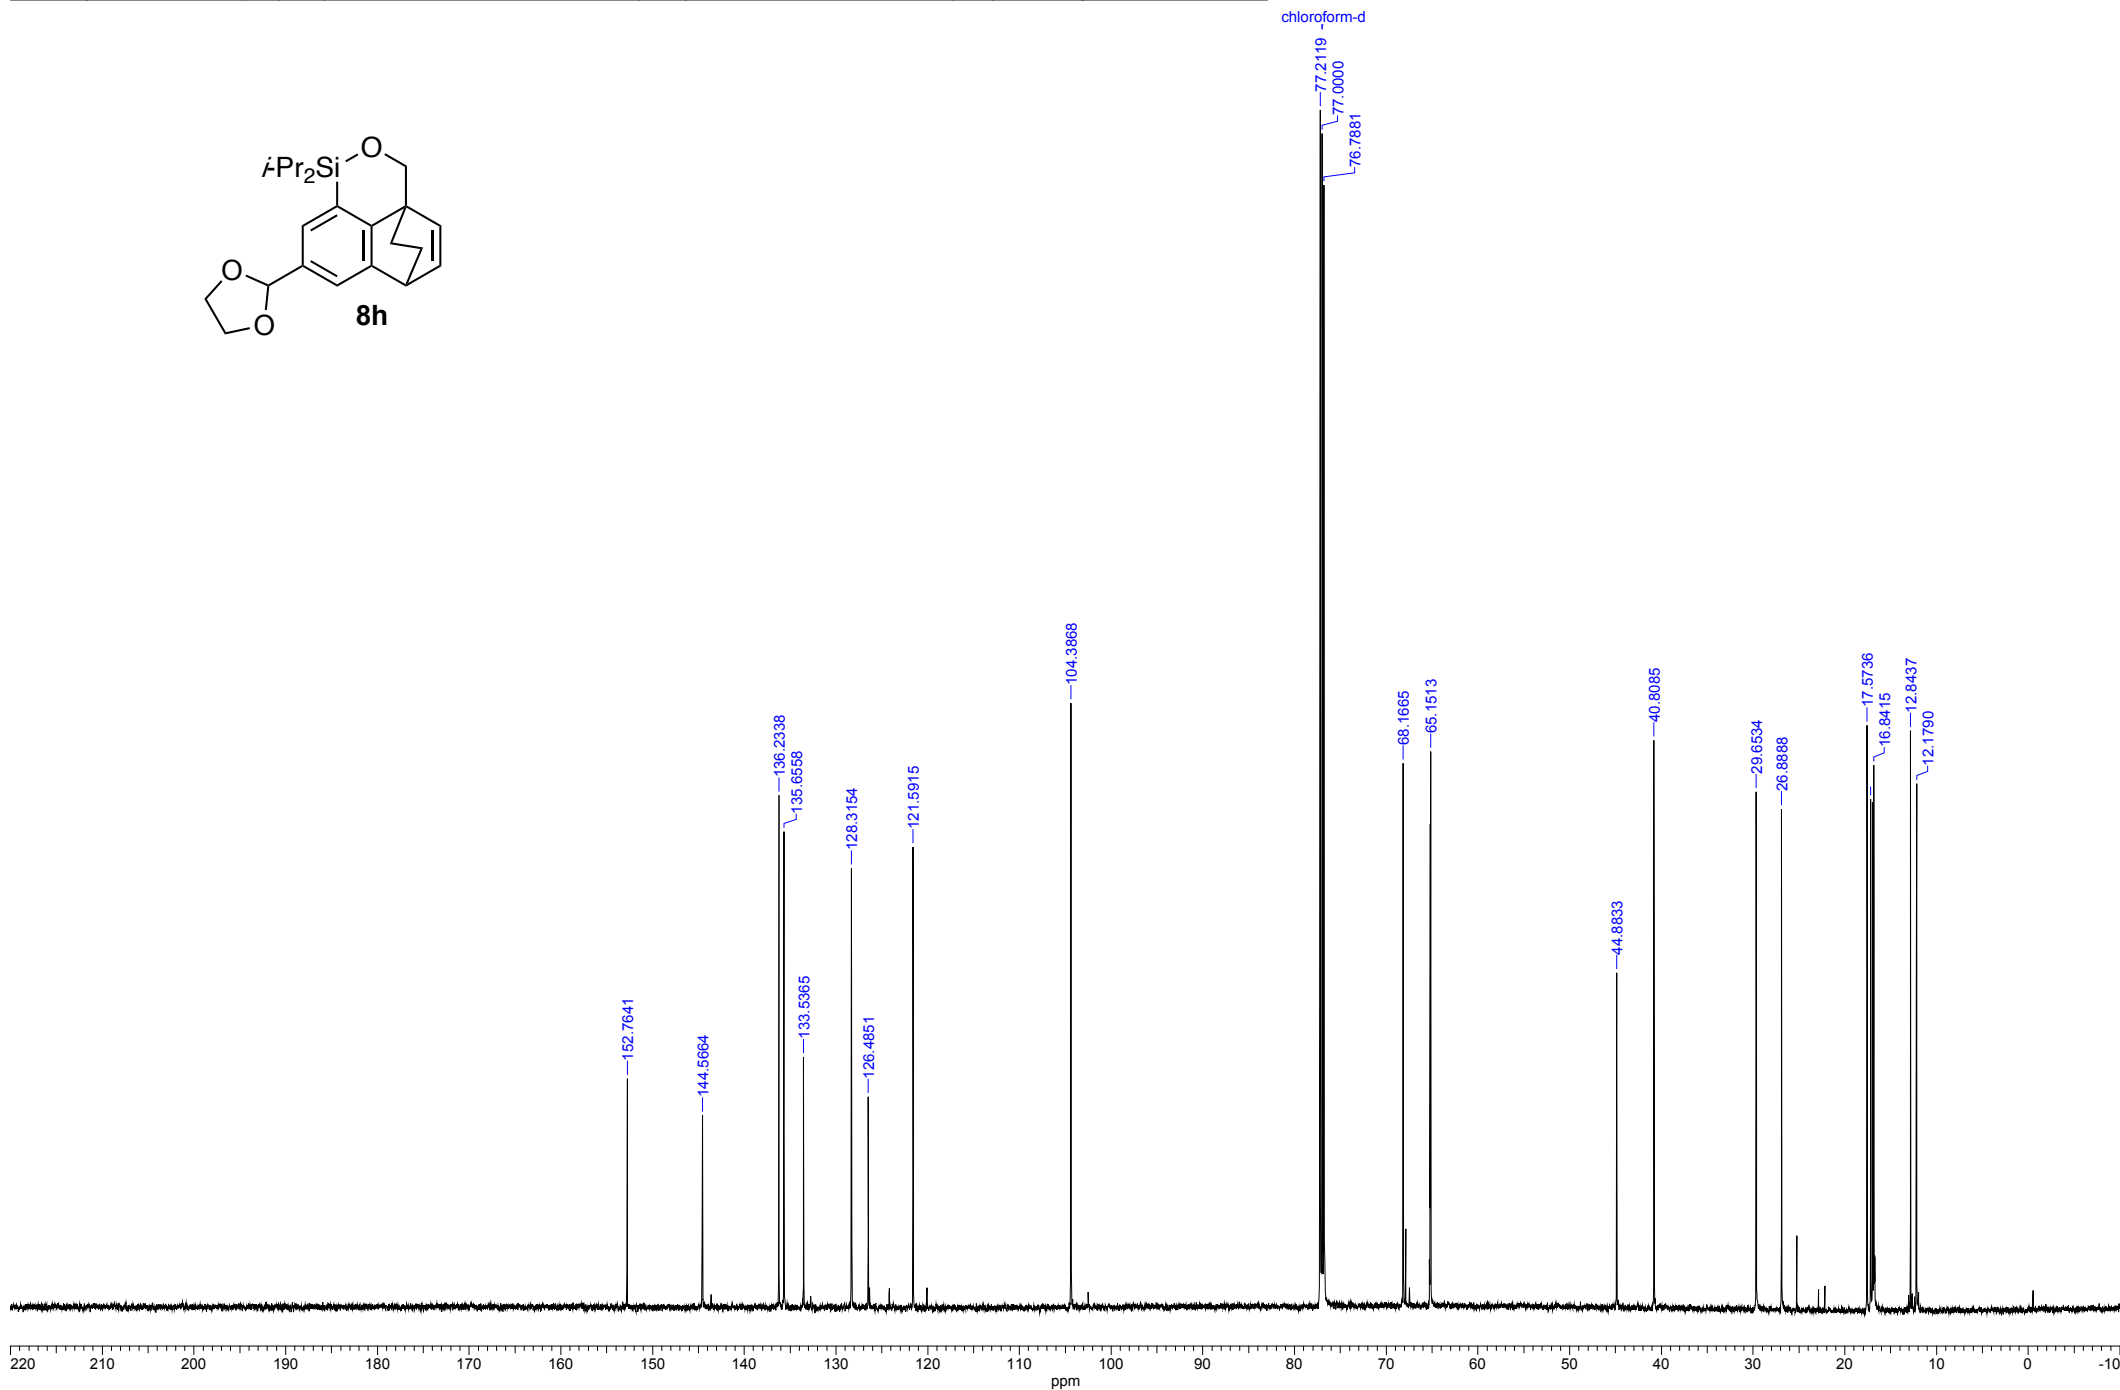

|                        |         |                        |              |                      |                      |                       |                                                       |
|------------------------|---------|------------------------|--------------|----------------------|----------------------|-----------------------|-------------------------------------------------------|
| Acquisition Time (sec) | 1.8153  | Comment                | single pulse | Date                 | 23 Jun 2021 20:05:58 | File Name             | F:\NMR CE t H \tawatari\T0555-1Hretake_proton-1-1_als |
| Frequency (MHz)        | 600.17  | Nucleus                | 1H           | Number of Transients | 8                    | Original Points Count | 16384                                                 |
| Sweep Width (Hz)       | 9025.27 | Temperature (degree C) | 21.700       | Points Count         | 13120                | Pulse Sequence        | proton.jxp                                            |
|                        |         |                        |              |                      |                      | Solvent               | CHLOROFORM-D                                          |

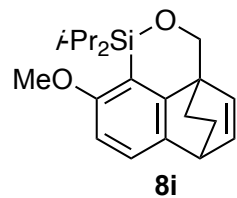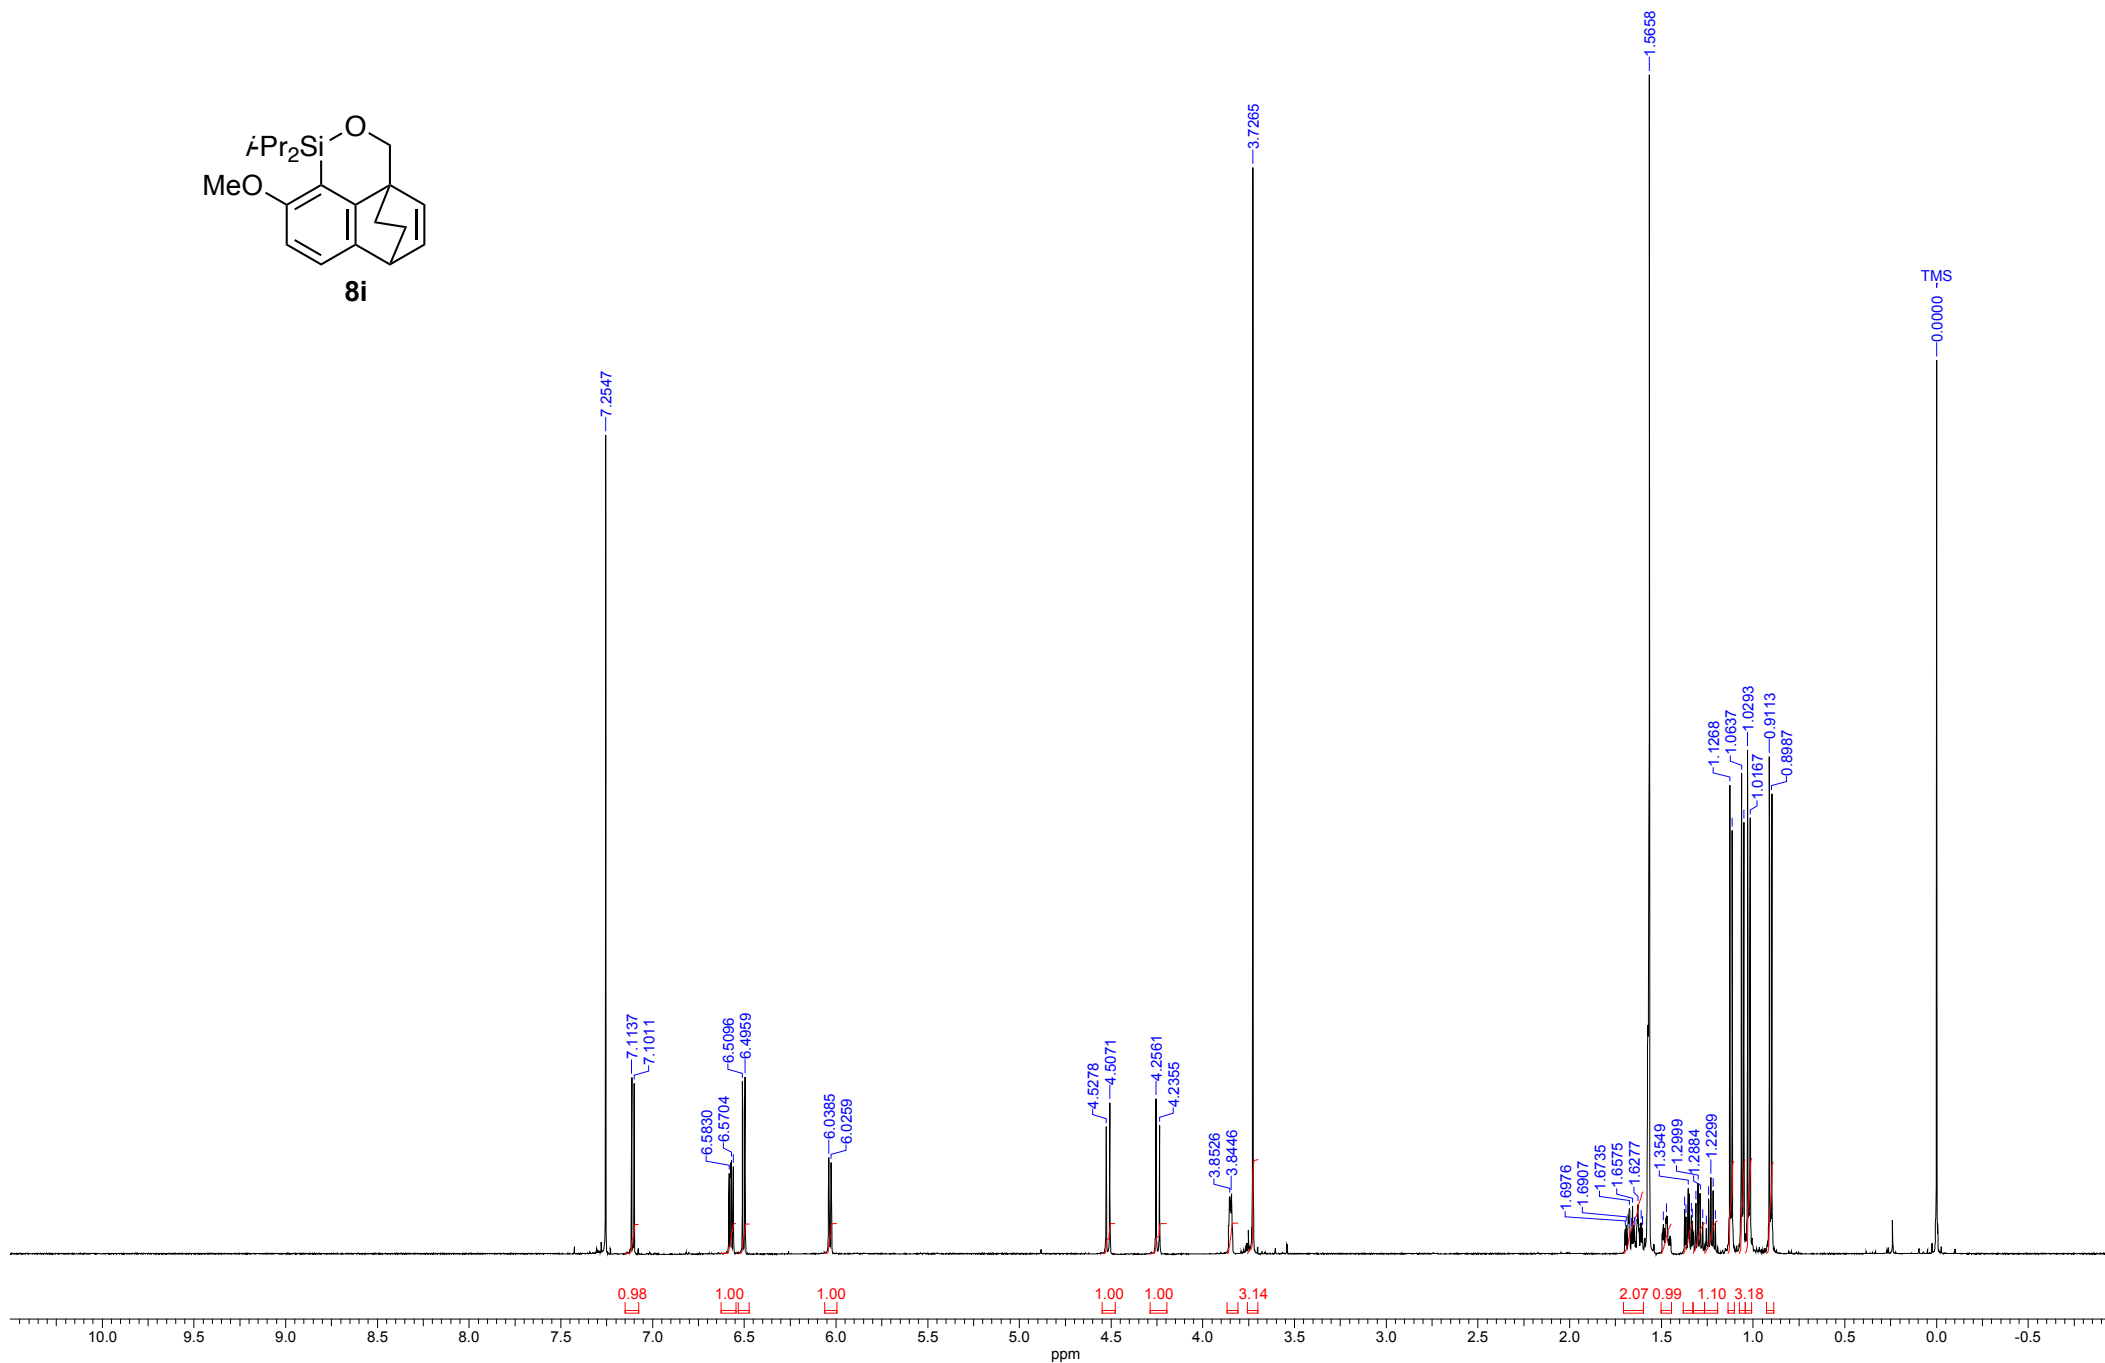



|                        |                                                      |                 |                                  |                      |                      |                        |        |
|------------------------|------------------------------------------------------|-----------------|----------------------------------|----------------------|----------------------|------------------------|--------|
| Acquisition Time (sec) | 0.6921                                               | Comment         | single pulse decoupled gated NOE | Date                 | 05 Sep 2020 00:45:32 |                        |        |
| File Name              | F:\NMR CE t H \tawatar\TT0555-13Cretake carbon-1.als | Frequency (MHz) | 150.00                           | Number of Transients | 364                  | Original Points Count  | 26214  |
| Pulse Sequence         | carbon_cool.jxp                                      | Solvent         | CHLOROFORM-D                     | Sweep Width (Hz)     | 37876.77             | Temperature (degree C) | 21.600 |
|                        |                                                      |                 |                                  |                      |                      | Points Count           | 26214  |

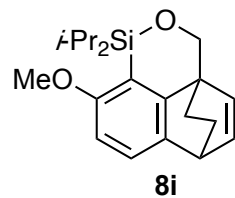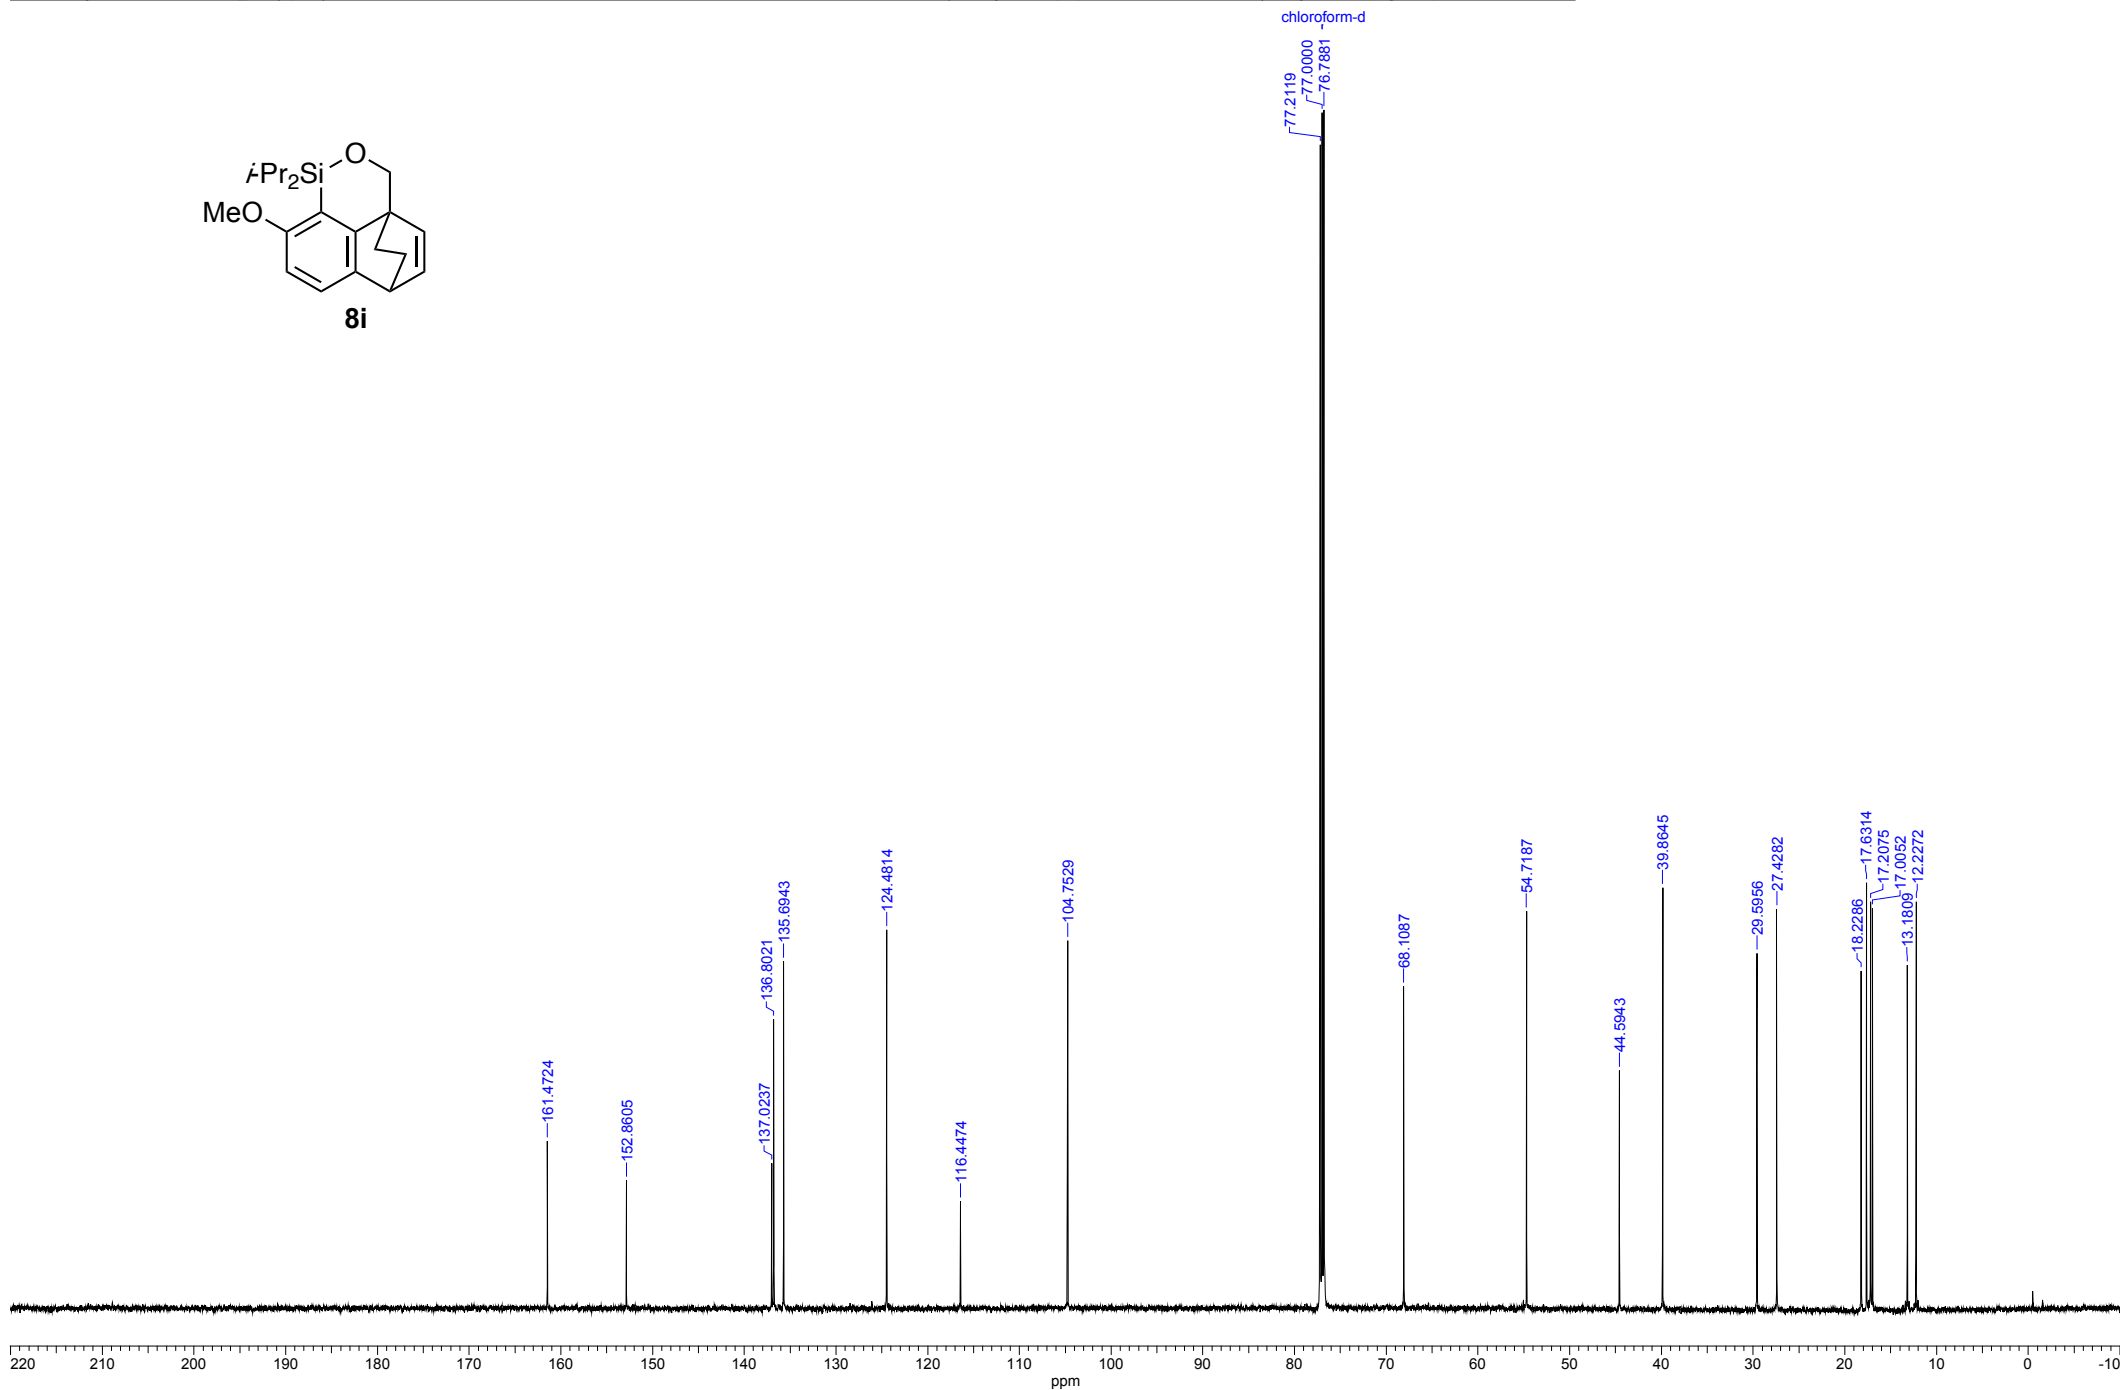

|                        |         |                        |              |                      |                      |                       |                                                      |              |
|------------------------|---------|------------------------|--------------|----------------------|----------------------|-----------------------|------------------------------------------------------|--------------|
| Acquisition Time (sec) | 1.8153  | Comment                | single_pulse | Date                 | 23 Jun 2021 21:11:28 | File Name             | F:\NMR CE t H \tawatari\TT0665-retake_proton-1-1.als |              |
| Frequency (MHz)        | 600.17  | Nucleus                | 1H           | Number of Transients | 8                    | Original Points Count | 16384                                                |              |
| Sweep Width (Hz)       | 9025.27 | Temperature (degree C) | 19.700       | Points Count         | 13120                | Pulse Sequence        | proton.jsp                                           |              |
|                        |         |                        |              |                      |                      |                       | Solvent                                              | CHLOROFORM-D |

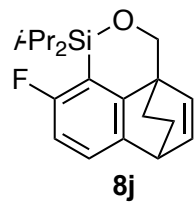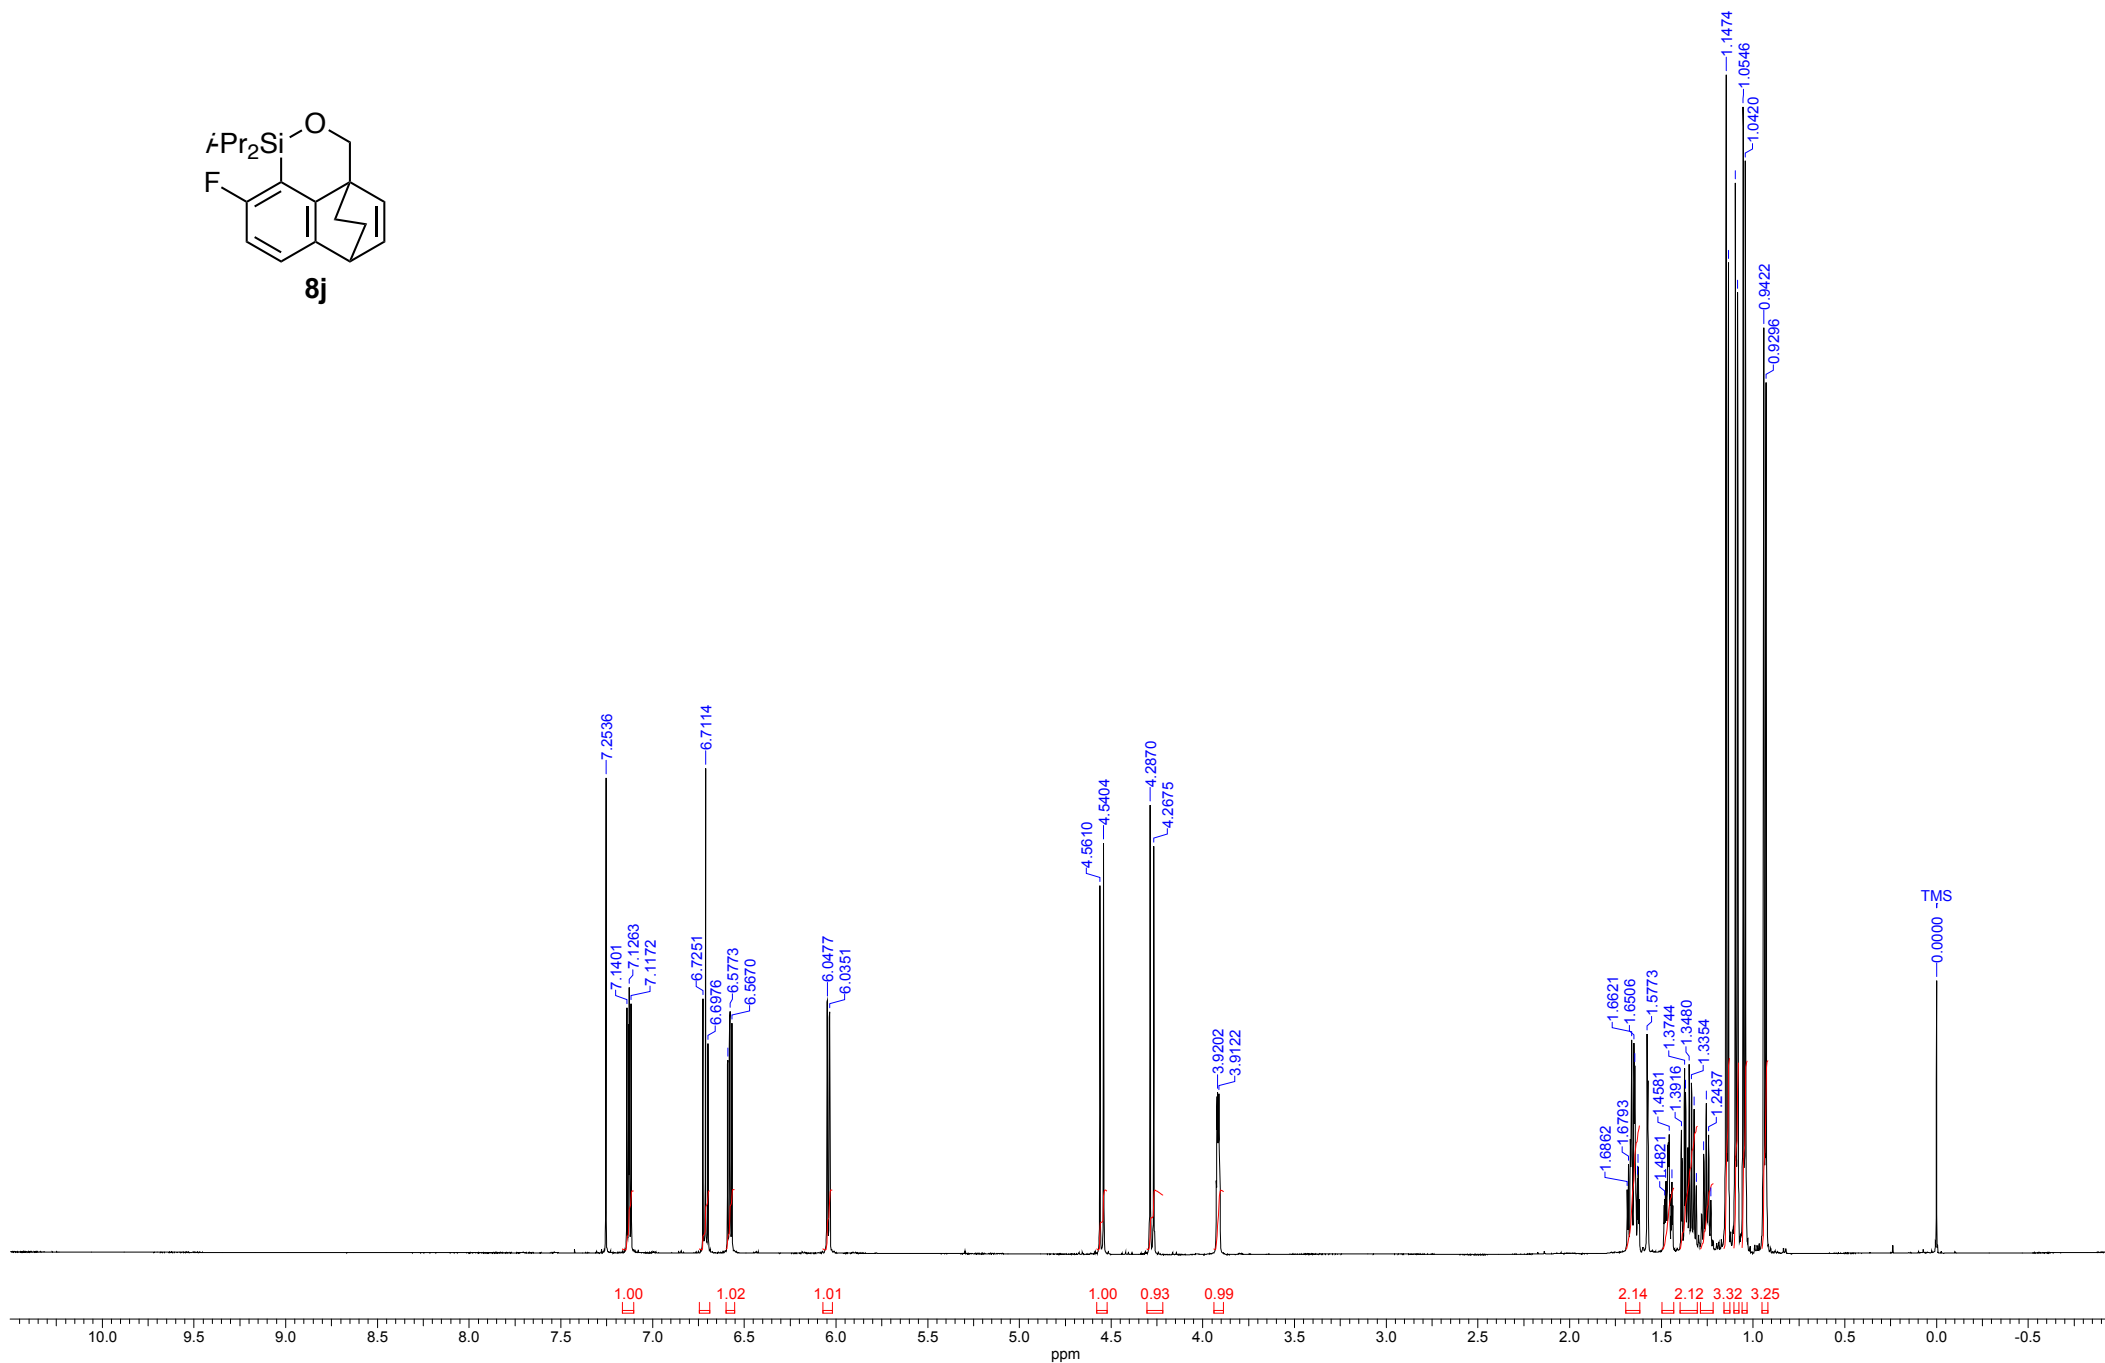

|                        |                                                   |                 |                                  |                      |                      |                        |        |              |       |
|------------------------|---------------------------------------------------|-----------------|----------------------------------|----------------------|----------------------|------------------------|--------|--------------|-------|
| Acquisition Time (sec) | 0.6921                                            | Comment         | single pulse decoupled gated NOE | Date                 | 15 Dec 2020 21:18:44 |                        |        |              |       |
| File Name              | F:\NMR CE t H \tawatar\TT0665-retake carbon-1.als | Frequency (MHz) | 150.00                           | Number of Transients | 1024                 | Original Points Count  | 26214  | Points Count | 26214 |
| Pulse Sequence         | carbon_cool.jxp                                   | Solvent         | CHLOROFORM-D                     | Sweep Width (Hz)     | 37876.77             | Temperature (degree C) | 20.100 |              |       |

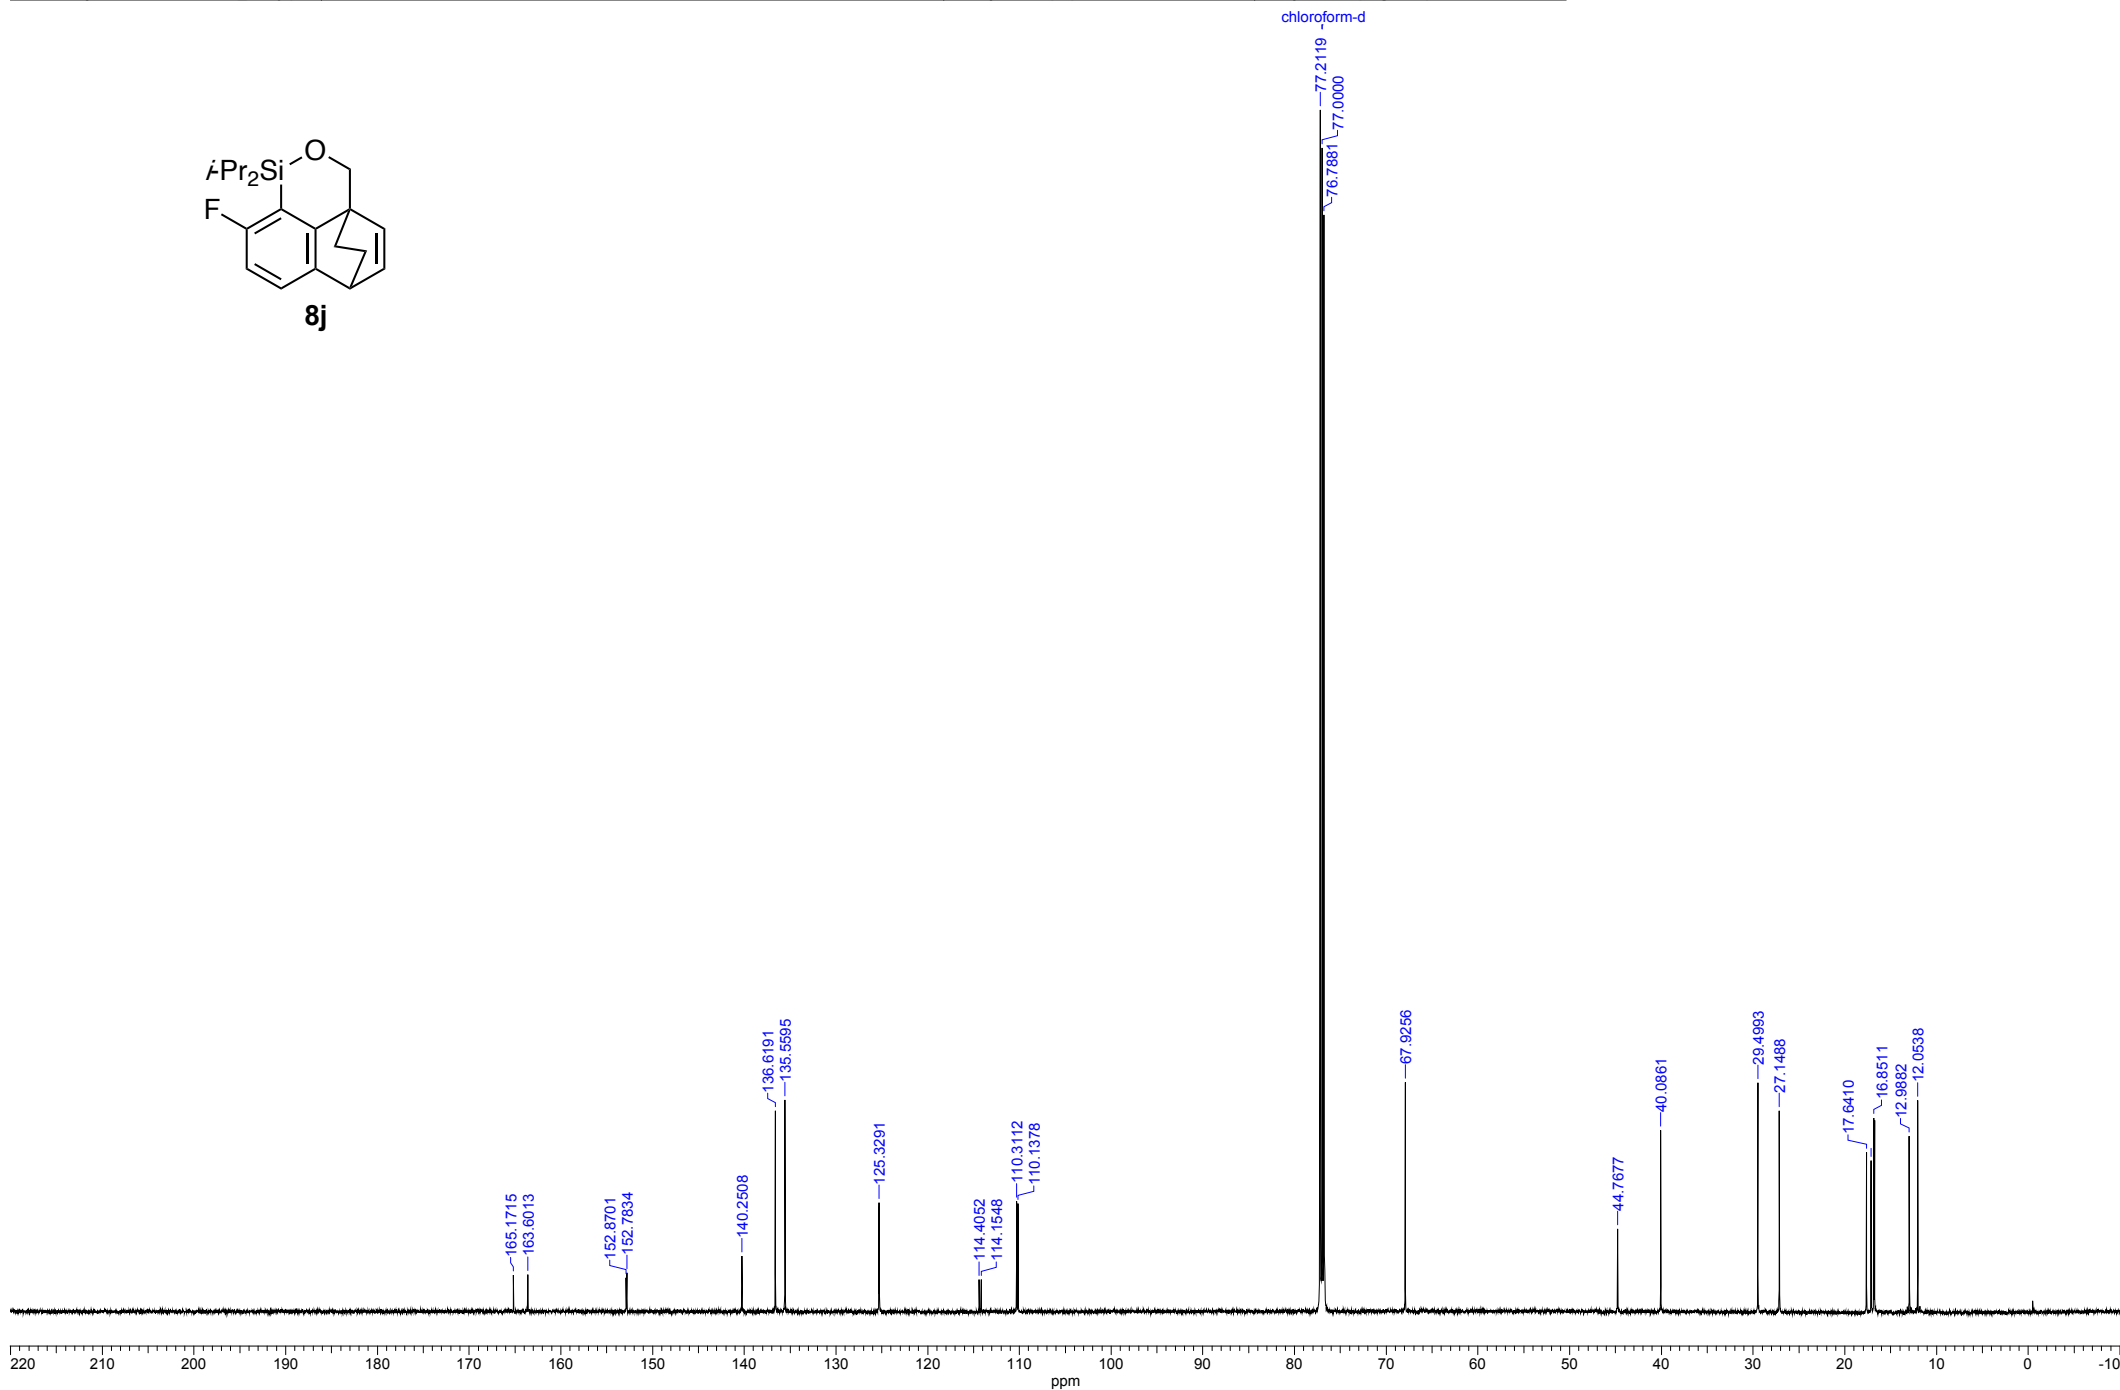

|                        |         |                        |              |                      |                      |                       |                                                  |
|------------------------|---------|------------------------|--------------|----------------------|----------------------|-----------------------|--------------------------------------------------|
| Acquisition Time (sec) | 1.8153  | Comment                | single pulse | Date                 | 24 Dec 2020 19:24:38 | File Name             | F:\NMR CE t H \tawatari\TT0672-1H_proton-1-1.als |
| Frequency (MHz)        | 600.17  | Nucleus                | 1H           | Number of Transients | 8                    | Original Points Count | 16384                                            |
| Sweep Width (Hz)       | 9025.27 | Temperature (degree C) | 19.400       | Points Count         | 13120                | Pulse Sequence        | proton.jxp                                       |
|                        |         |                        |              |                      |                      | Solvent               | CHLOROFORM-D                                     |

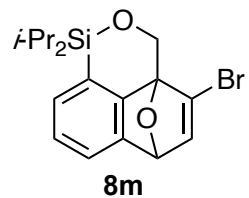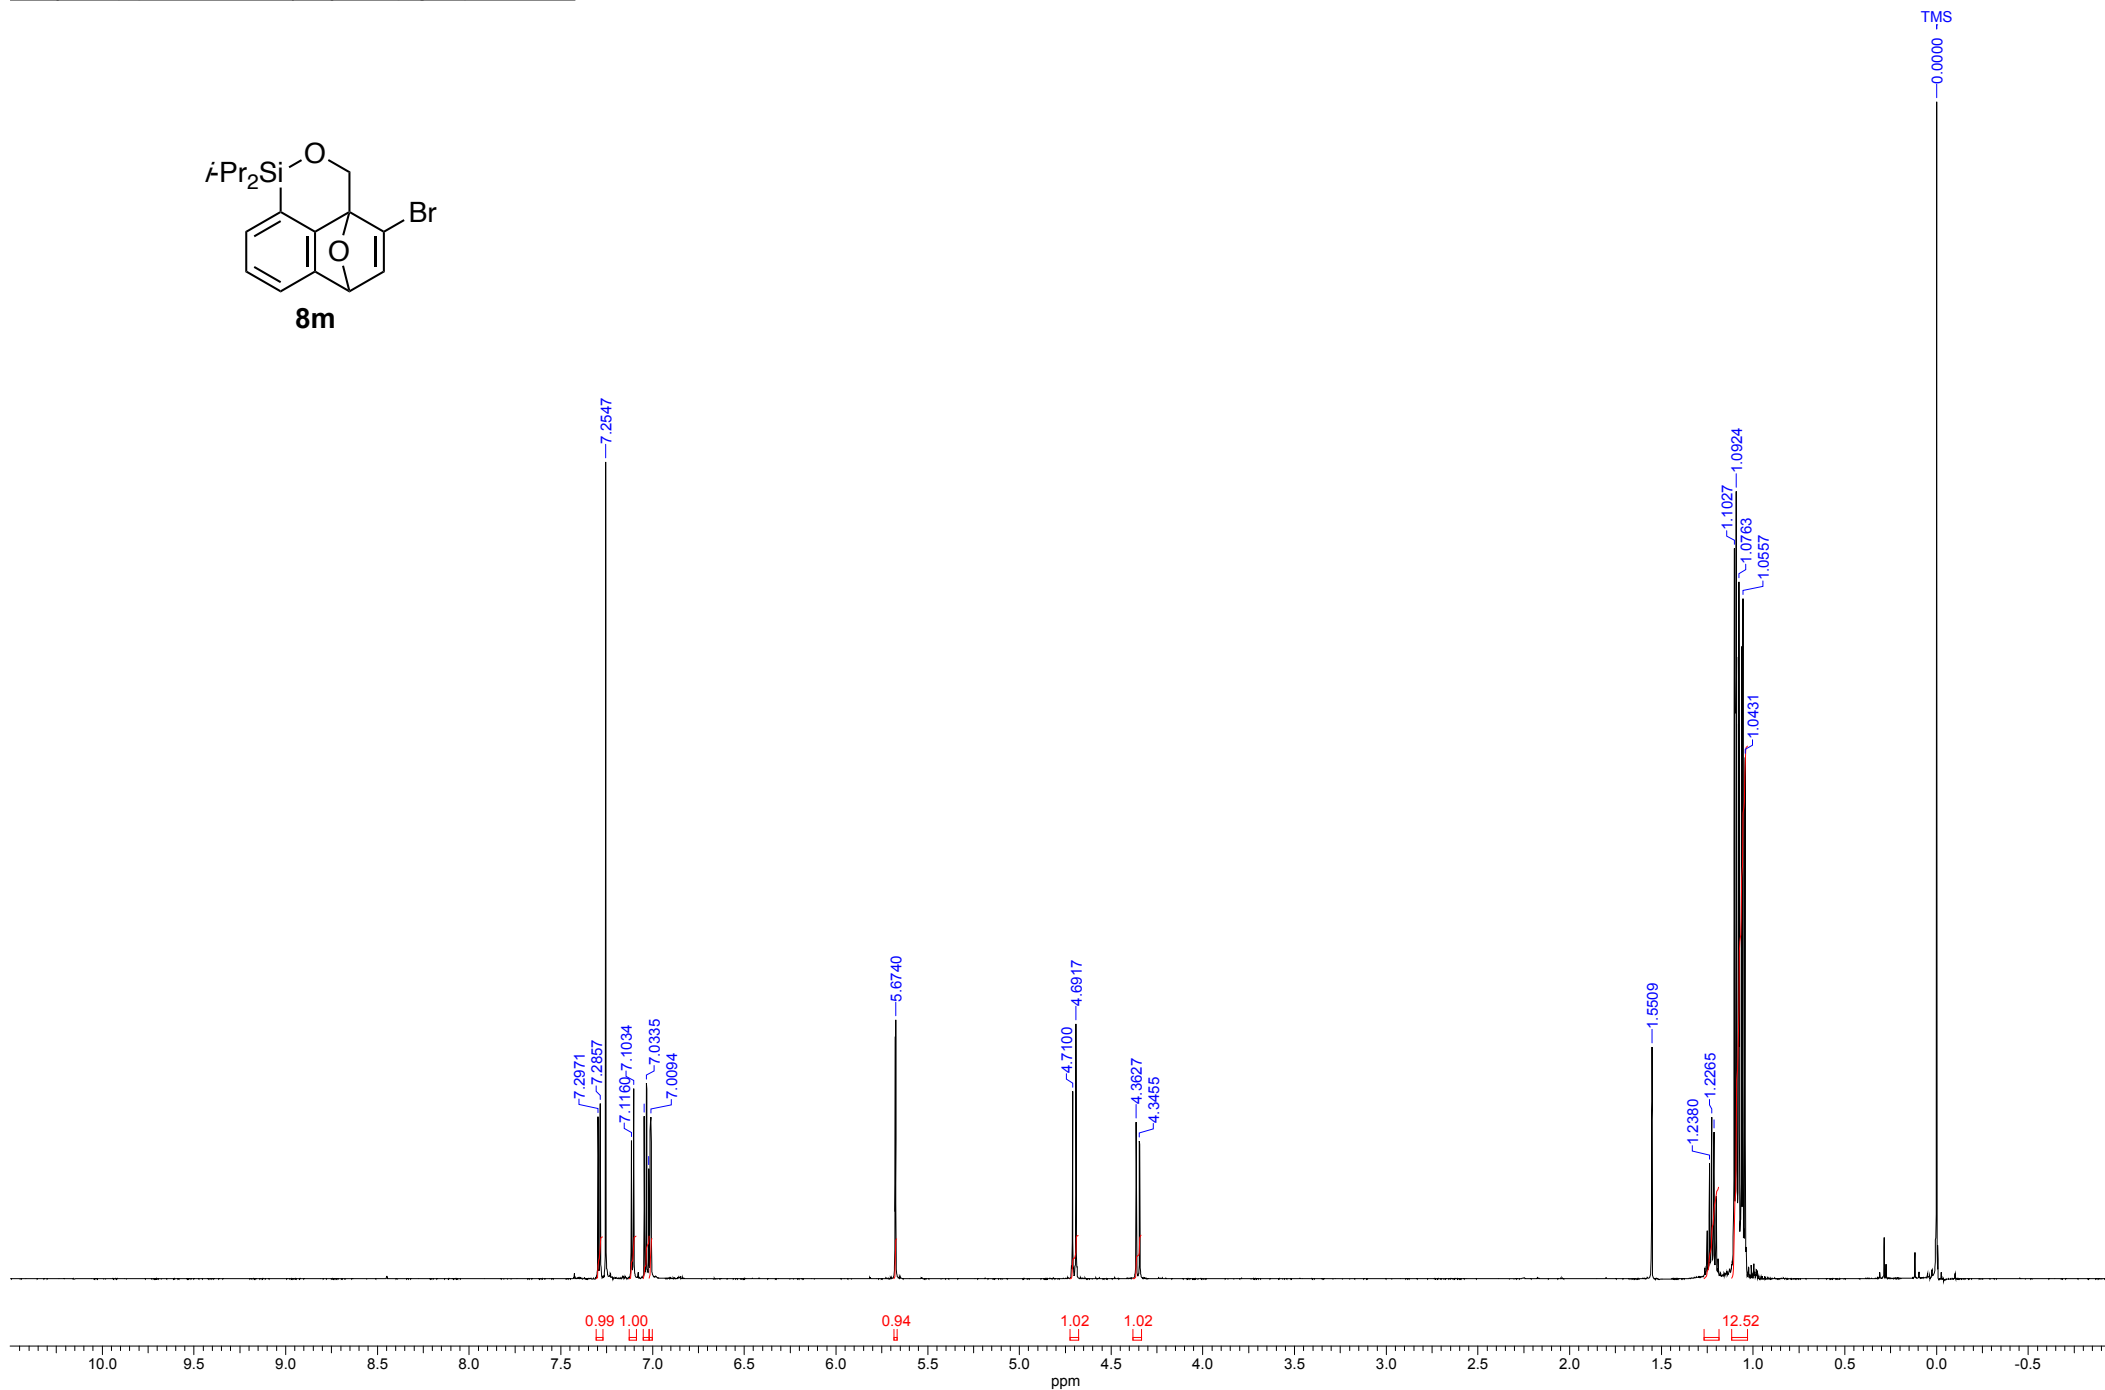

|                        |          |                        |                                  |                       |                      |              |                                                |
|------------------------|----------|------------------------|----------------------------------|-----------------------|----------------------|--------------|------------------------------------------------|
| Acquisition Time (sec) | 0.6921   | Comment                | single pulse decoupled gated NOE | Date                  | 24 Dec 2020 19:24:08 | File Name    | F:\NMR_CE_t_H\tawatari\TT0672-13C carbon-1.als |
| Frequency (MHz)        | 150.00   | Number of Transients   | 256                              | Original Points Count | 26214                | Points Count | 26214                                          |
| Sweep Width (Hz)       | 37876.77 | Temperature (degree C) | 19.500                           | Pulse Sequence        | carbon_cool.jxp      | Solvent      | CHLOROFORM-D                                   |

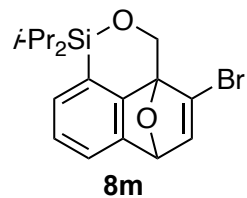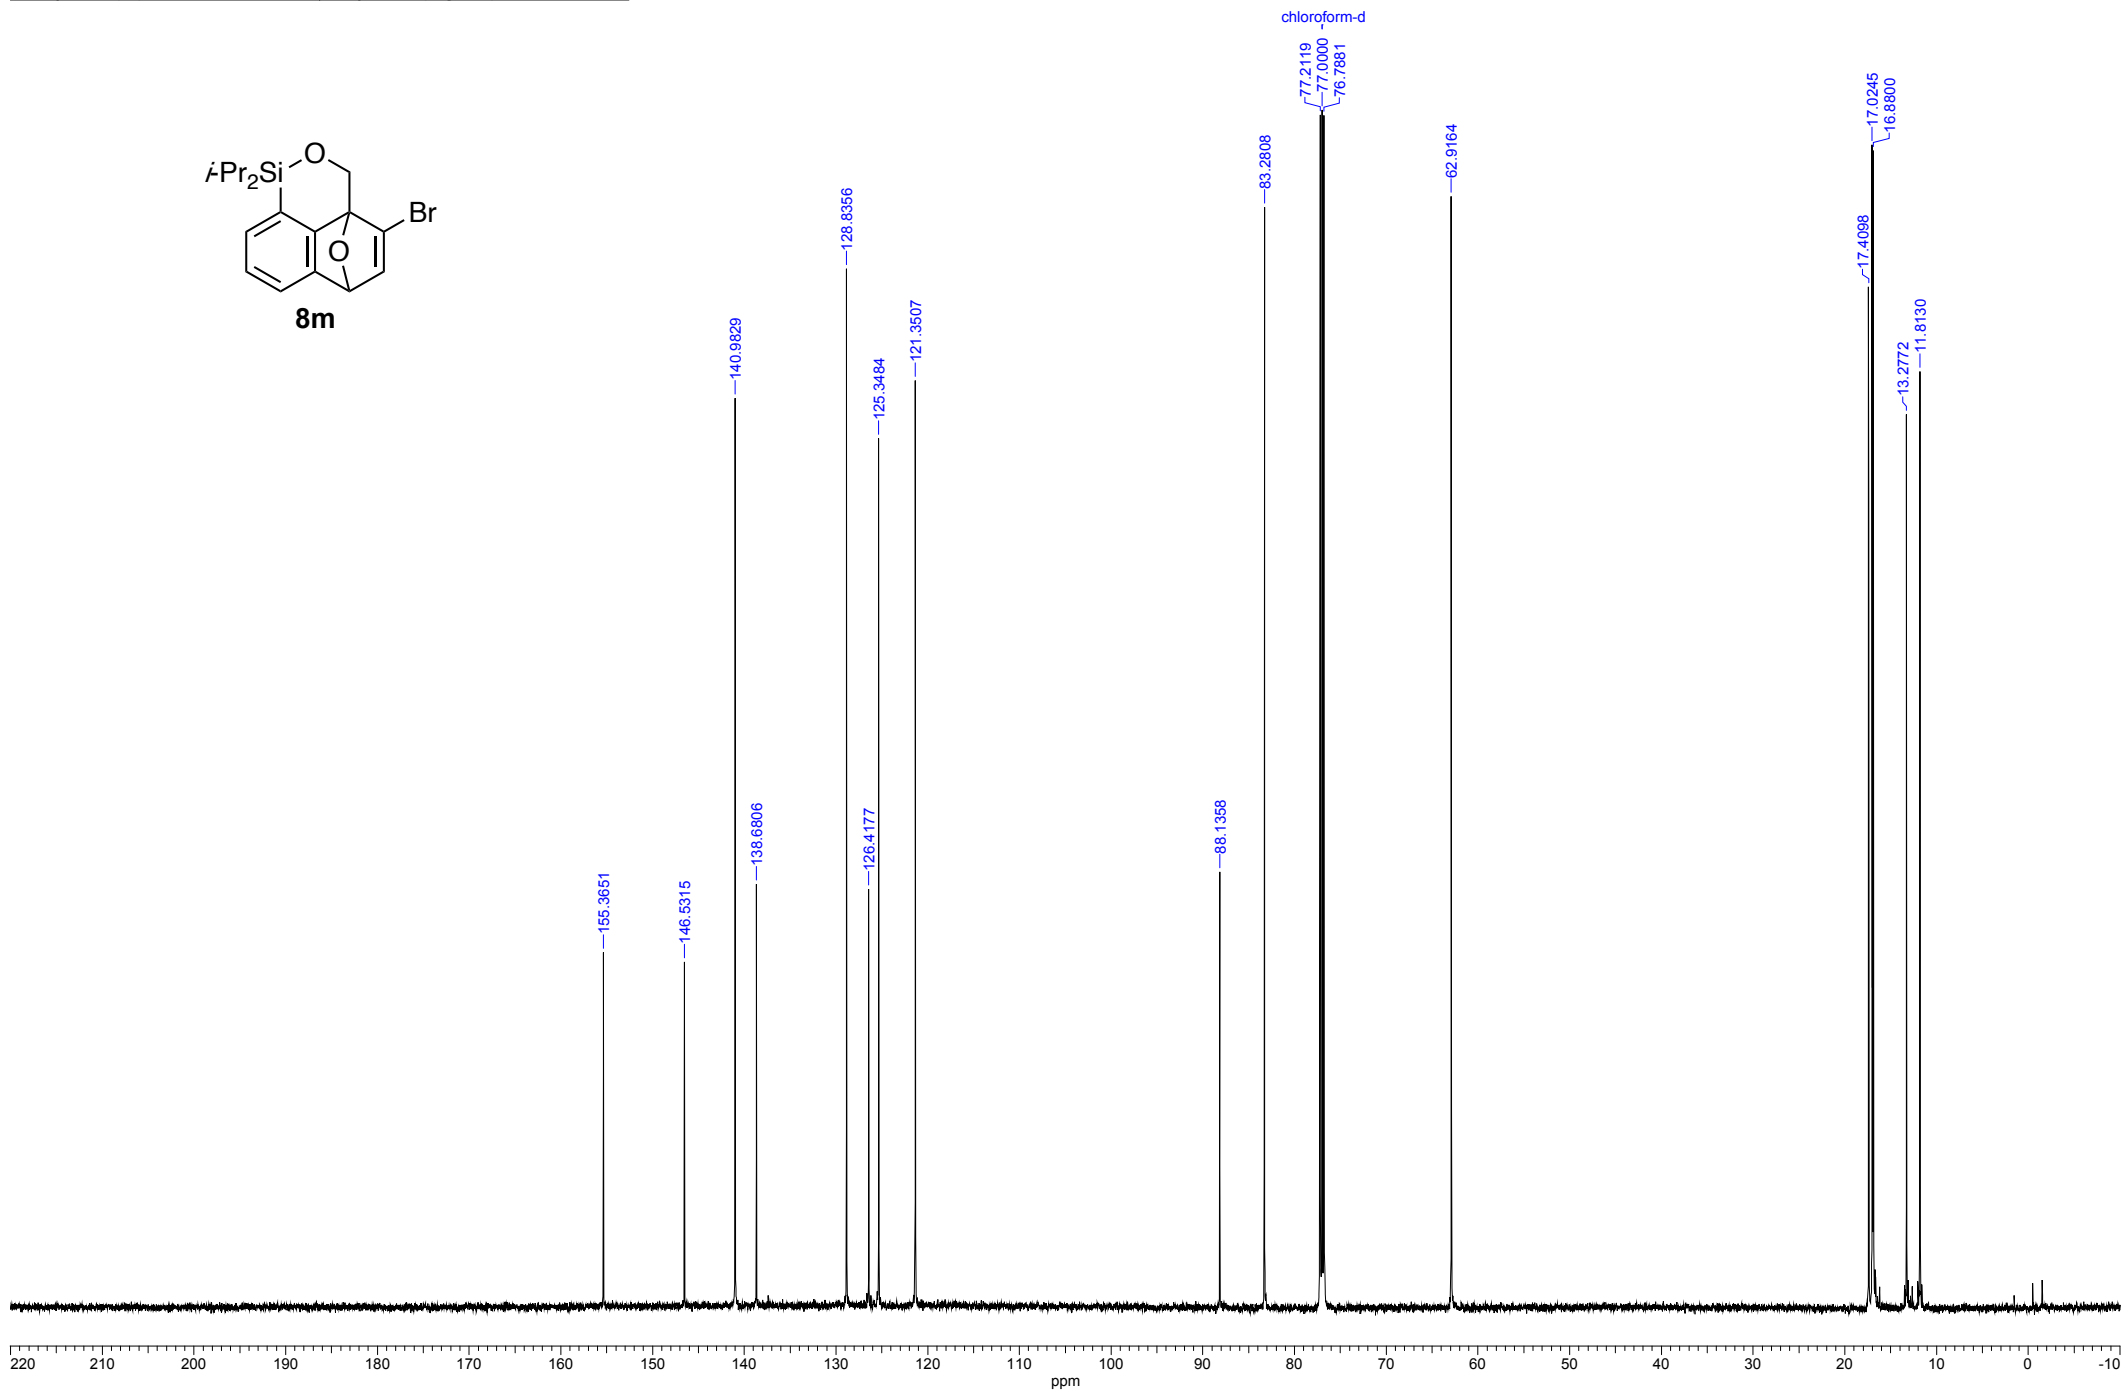

|                        |         |                        |                      |              |                                                |                 |                  |         |              |
|------------------------|---------|------------------------|----------------------|--------------|------------------------------------------------|-----------------|------------------|---------|--------------|
| Acquisition Time (sec) | 3.4918  | Date                   | 03 Jul 2020 02:14:06 | File Name    | F:\NMR CE t H \tawatari\TT0485-1H-retake-1.als | Frequency (MHz) | 500.16           | Nucleus | 1H           |
| Number of Transients   | 8       | Original Points Count  | 26214                | Points Count | 26214                                          | Pulse Sequence  | single_pulse.ex2 | Solvent | CHLOROFORM-D |
| Sweep Width (Hz)       | 7507.39 | Temperature (degree C) | 22.500               |              |                                                |                 |                  |         |              |

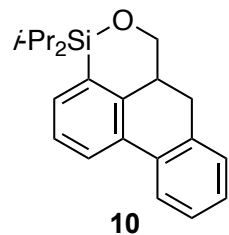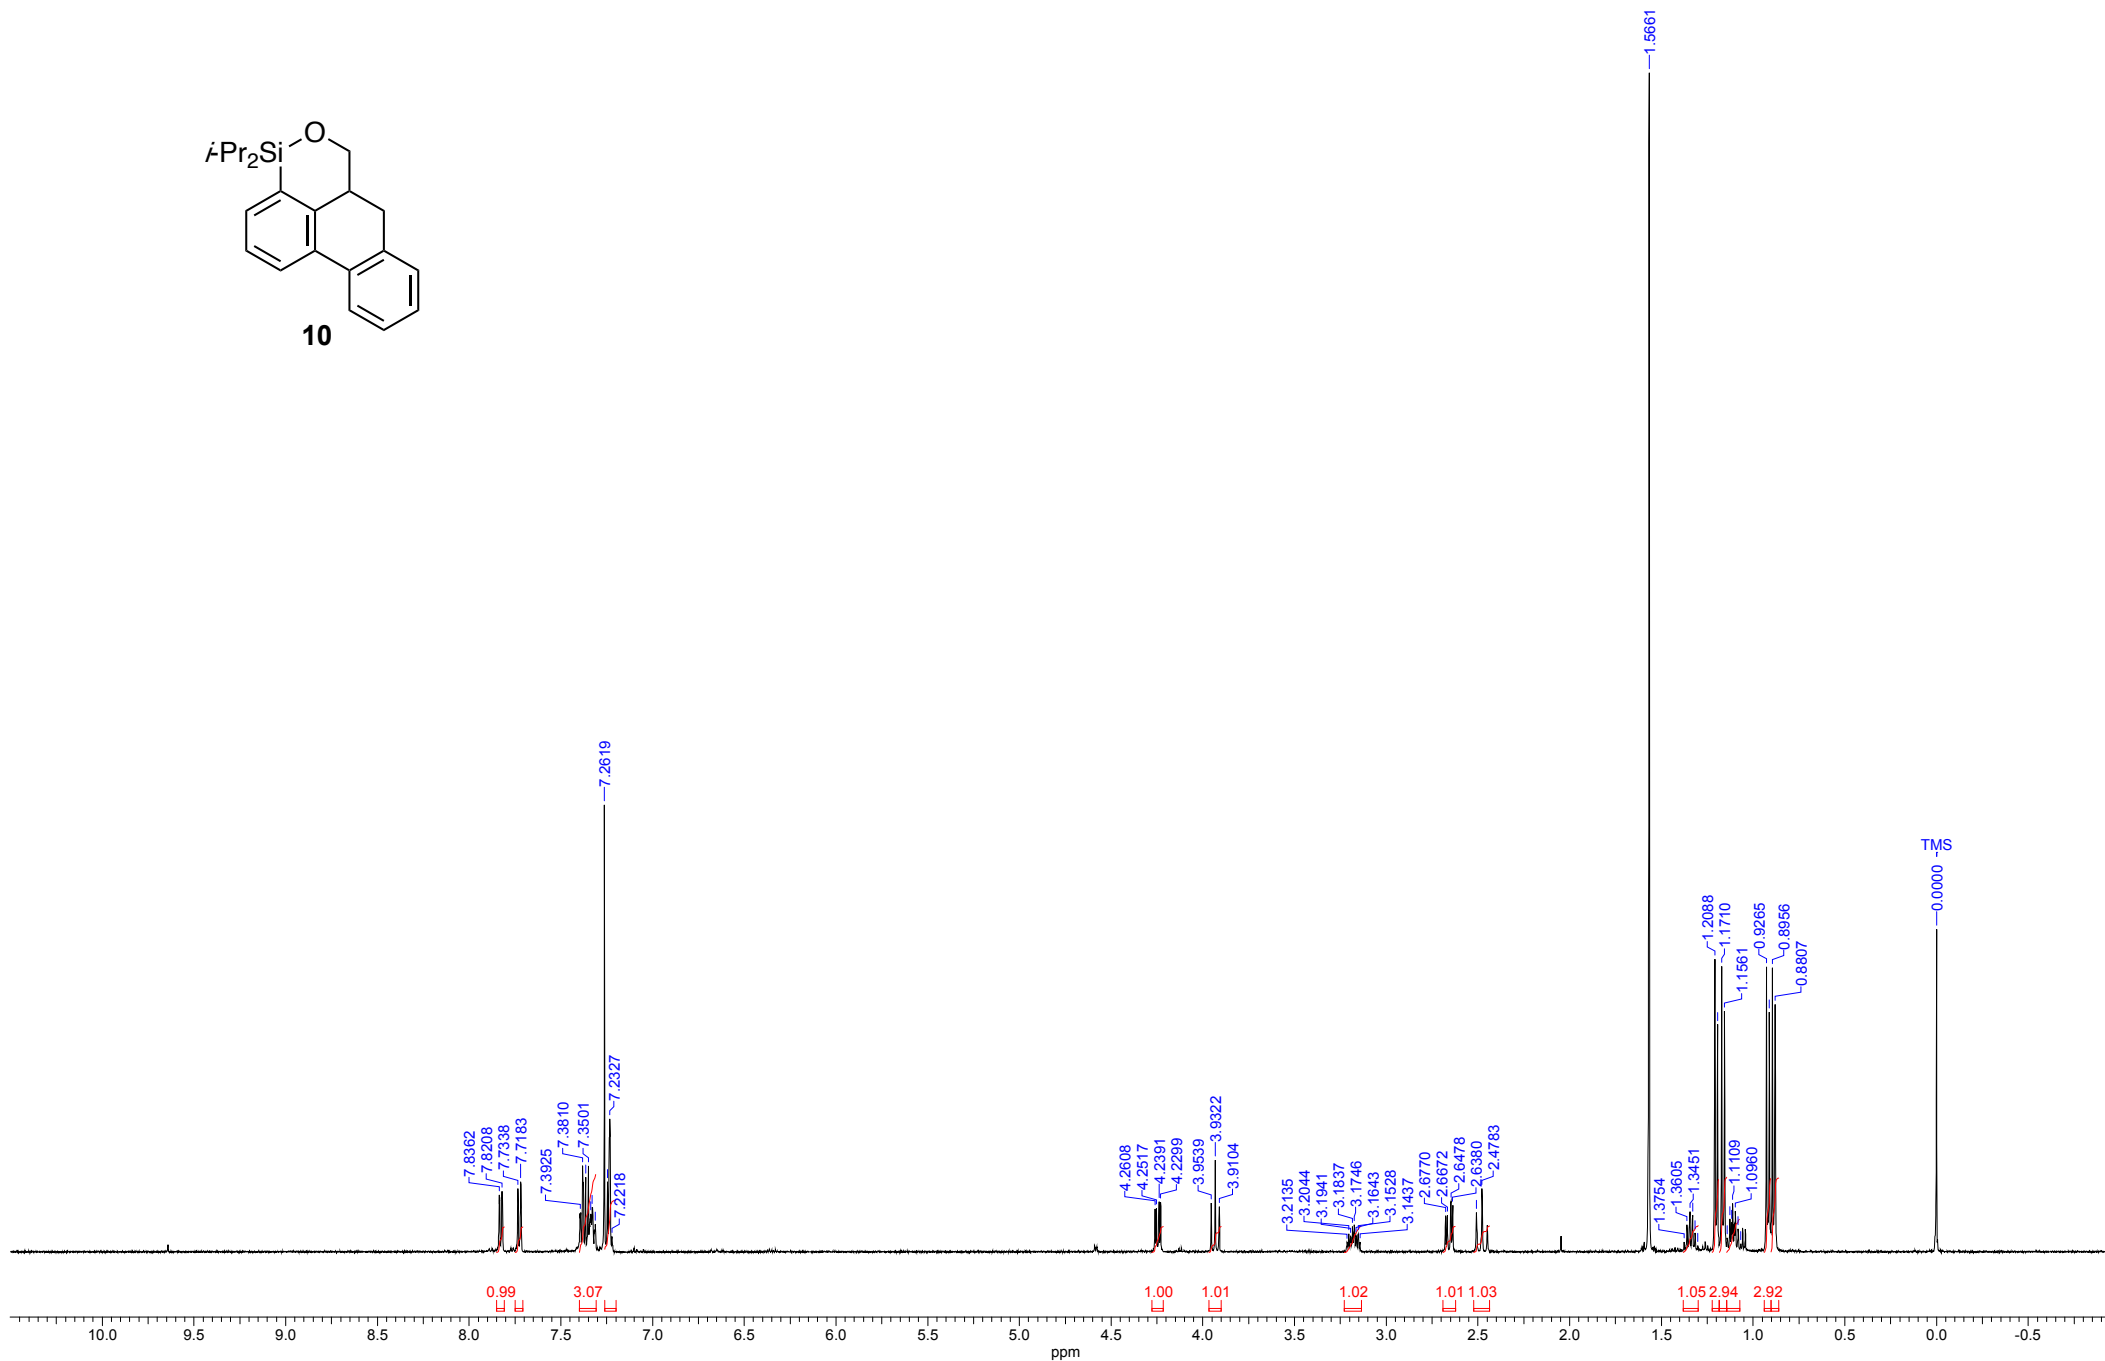

|                        |          |                        |                      |              |                                          |                 |                  |         |              |
|------------------------|----------|------------------------|----------------------|--------------|------------------------------------------|-----------------|------------------|---------|--------------|
| Acquisition Time (sec) | 0.8336   | Date                   | 03 Jul 2020 02:26:58 | File Name    | F:\NMR CE t H \tawatari\TT0485-13C-1.als | Frequency (MHz) | 125.77           | Nucleus | 13C          |
| Number of Transients   | 256      | Original Points Count  | 26214                | Points Count | 26214                                    | Pulse Sequence  | single_pulse_dec | Solvent | CHLOROFORM-D |
| Sweep Width (Hz)       | 31446.06 | Temperature (degree C) | 22.900               |              |                                          |                 |                  |         |              |

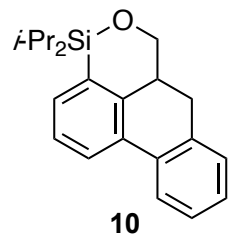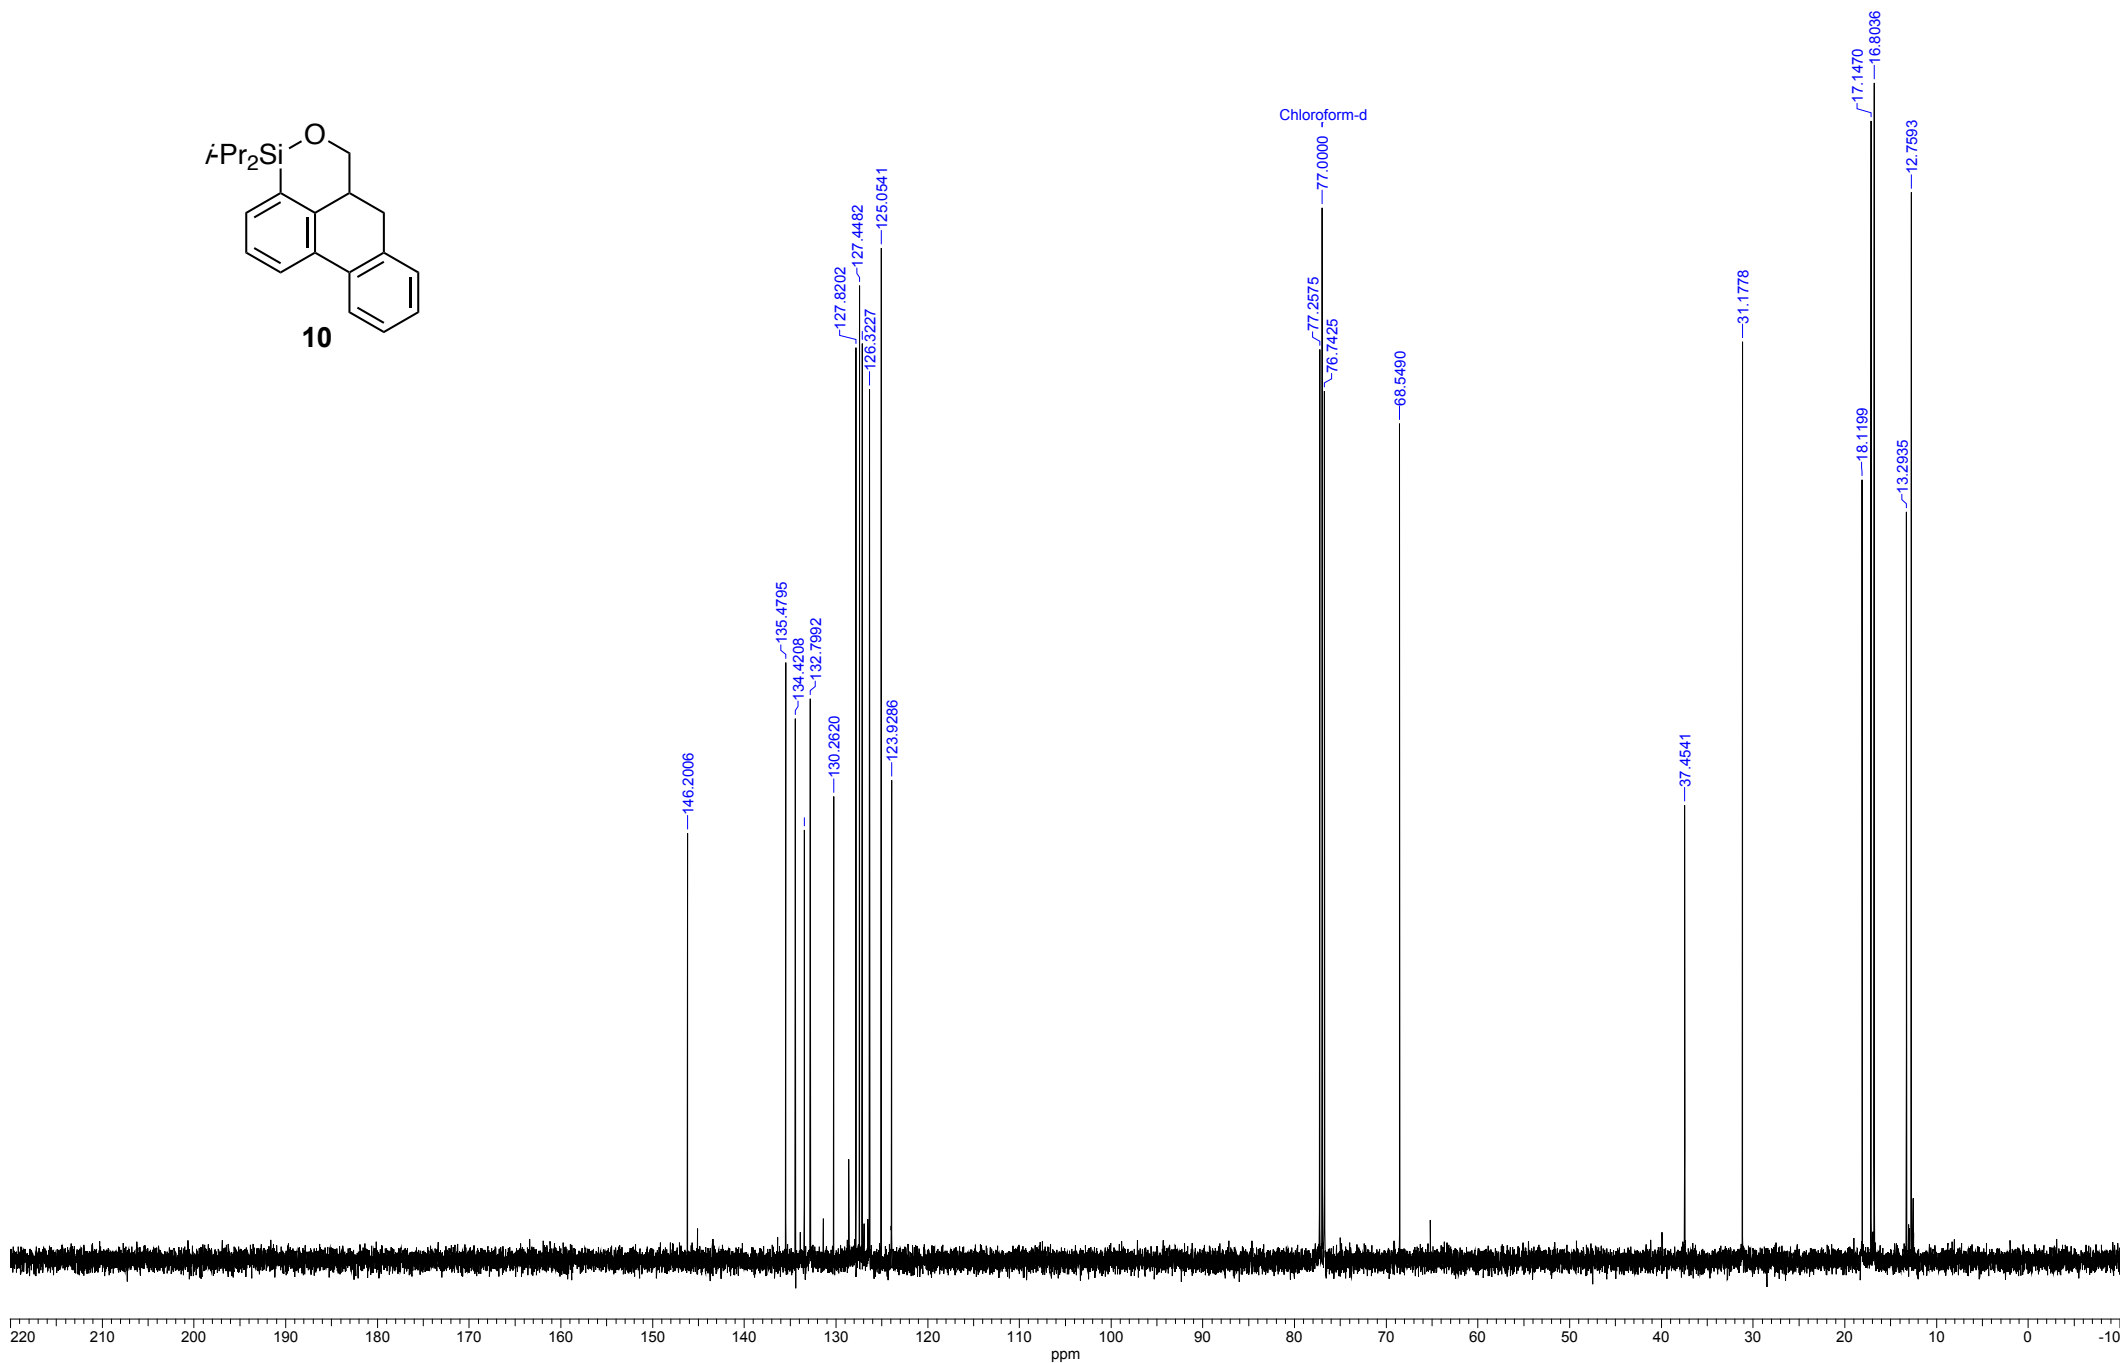

|                        |         |                        |                      |              |                                                 |                 |                  |         |              |
|------------------------|---------|------------------------|----------------------|--------------|-------------------------------------------------|-----------------|------------------|---------|--------------|
| Acquisition Time (sec) | 3.4918  | Date                   | 30 Jun 2020 13:36:02 | File Name    | F:\NMR CE t H \tawatari\TT0051column1ptc2-1.als | Frequency (MHz) | 500.16           | Nucleus | 1H           |
| Number of Transients   | 8       | Original Points Count  | 26214                | Points Count | 26214                                           | Pulse Sequence  | single_pulse.ex2 | Solvent | CHLOROFORM-D |
| Sweep Width (Hz)       | 7507.39 | Temperature (degree C) | 20.000               |              |                                                 |                 |                  |         |              |

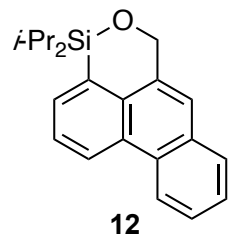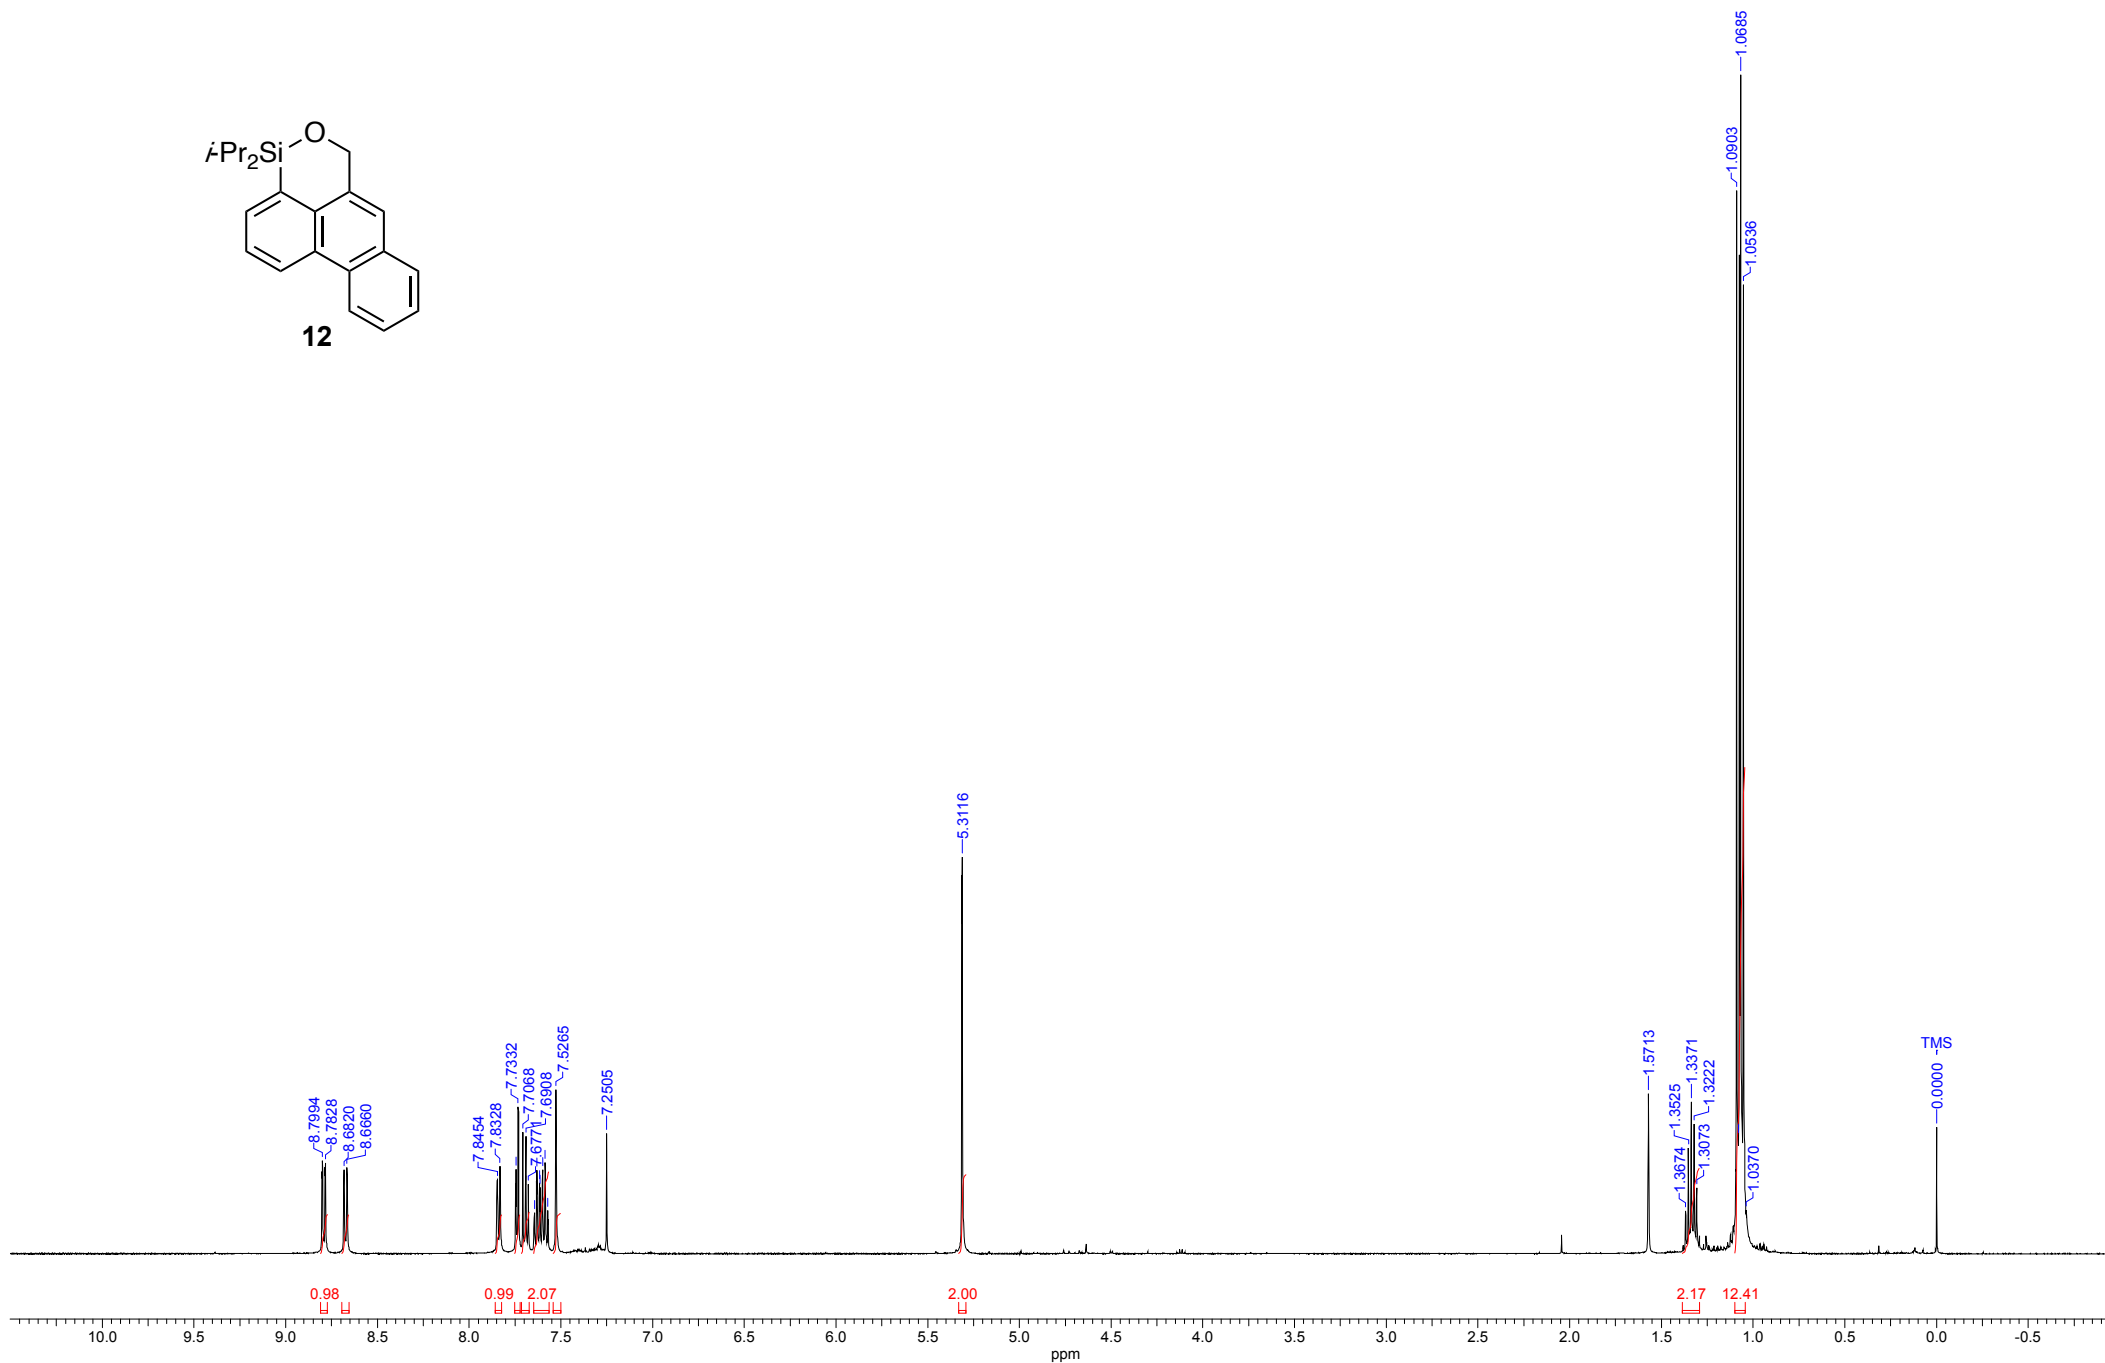



|                        |                 |                        |                      |                       |                                                        |                 |              |
|------------------------|-----------------|------------------------|----------------------|-----------------------|--------------------------------------------------------|-----------------|--------------|
| Acquisition Time (sec) | 0.8336          | Date                   | 30 Jun 2020 13:35:30 | File Name             | F:\NMR CE t H \tawatari\TT0051column1ptlc2carbon-1.als | Frequency (MHz) | 125.77       |
| Nucleus                | <sup>13</sup> C | Number of Transients   | 256                  | Original Points Count | 26214                                                  | Points Count    | 26214        |
| Sweep Width (Hz)       | 31446.06        | Temperature (degree C) | 20.600               | Pulse Sequence        | single_pulse_dec                                       | Solvent         | CHLOROFORM-D |

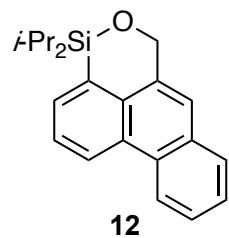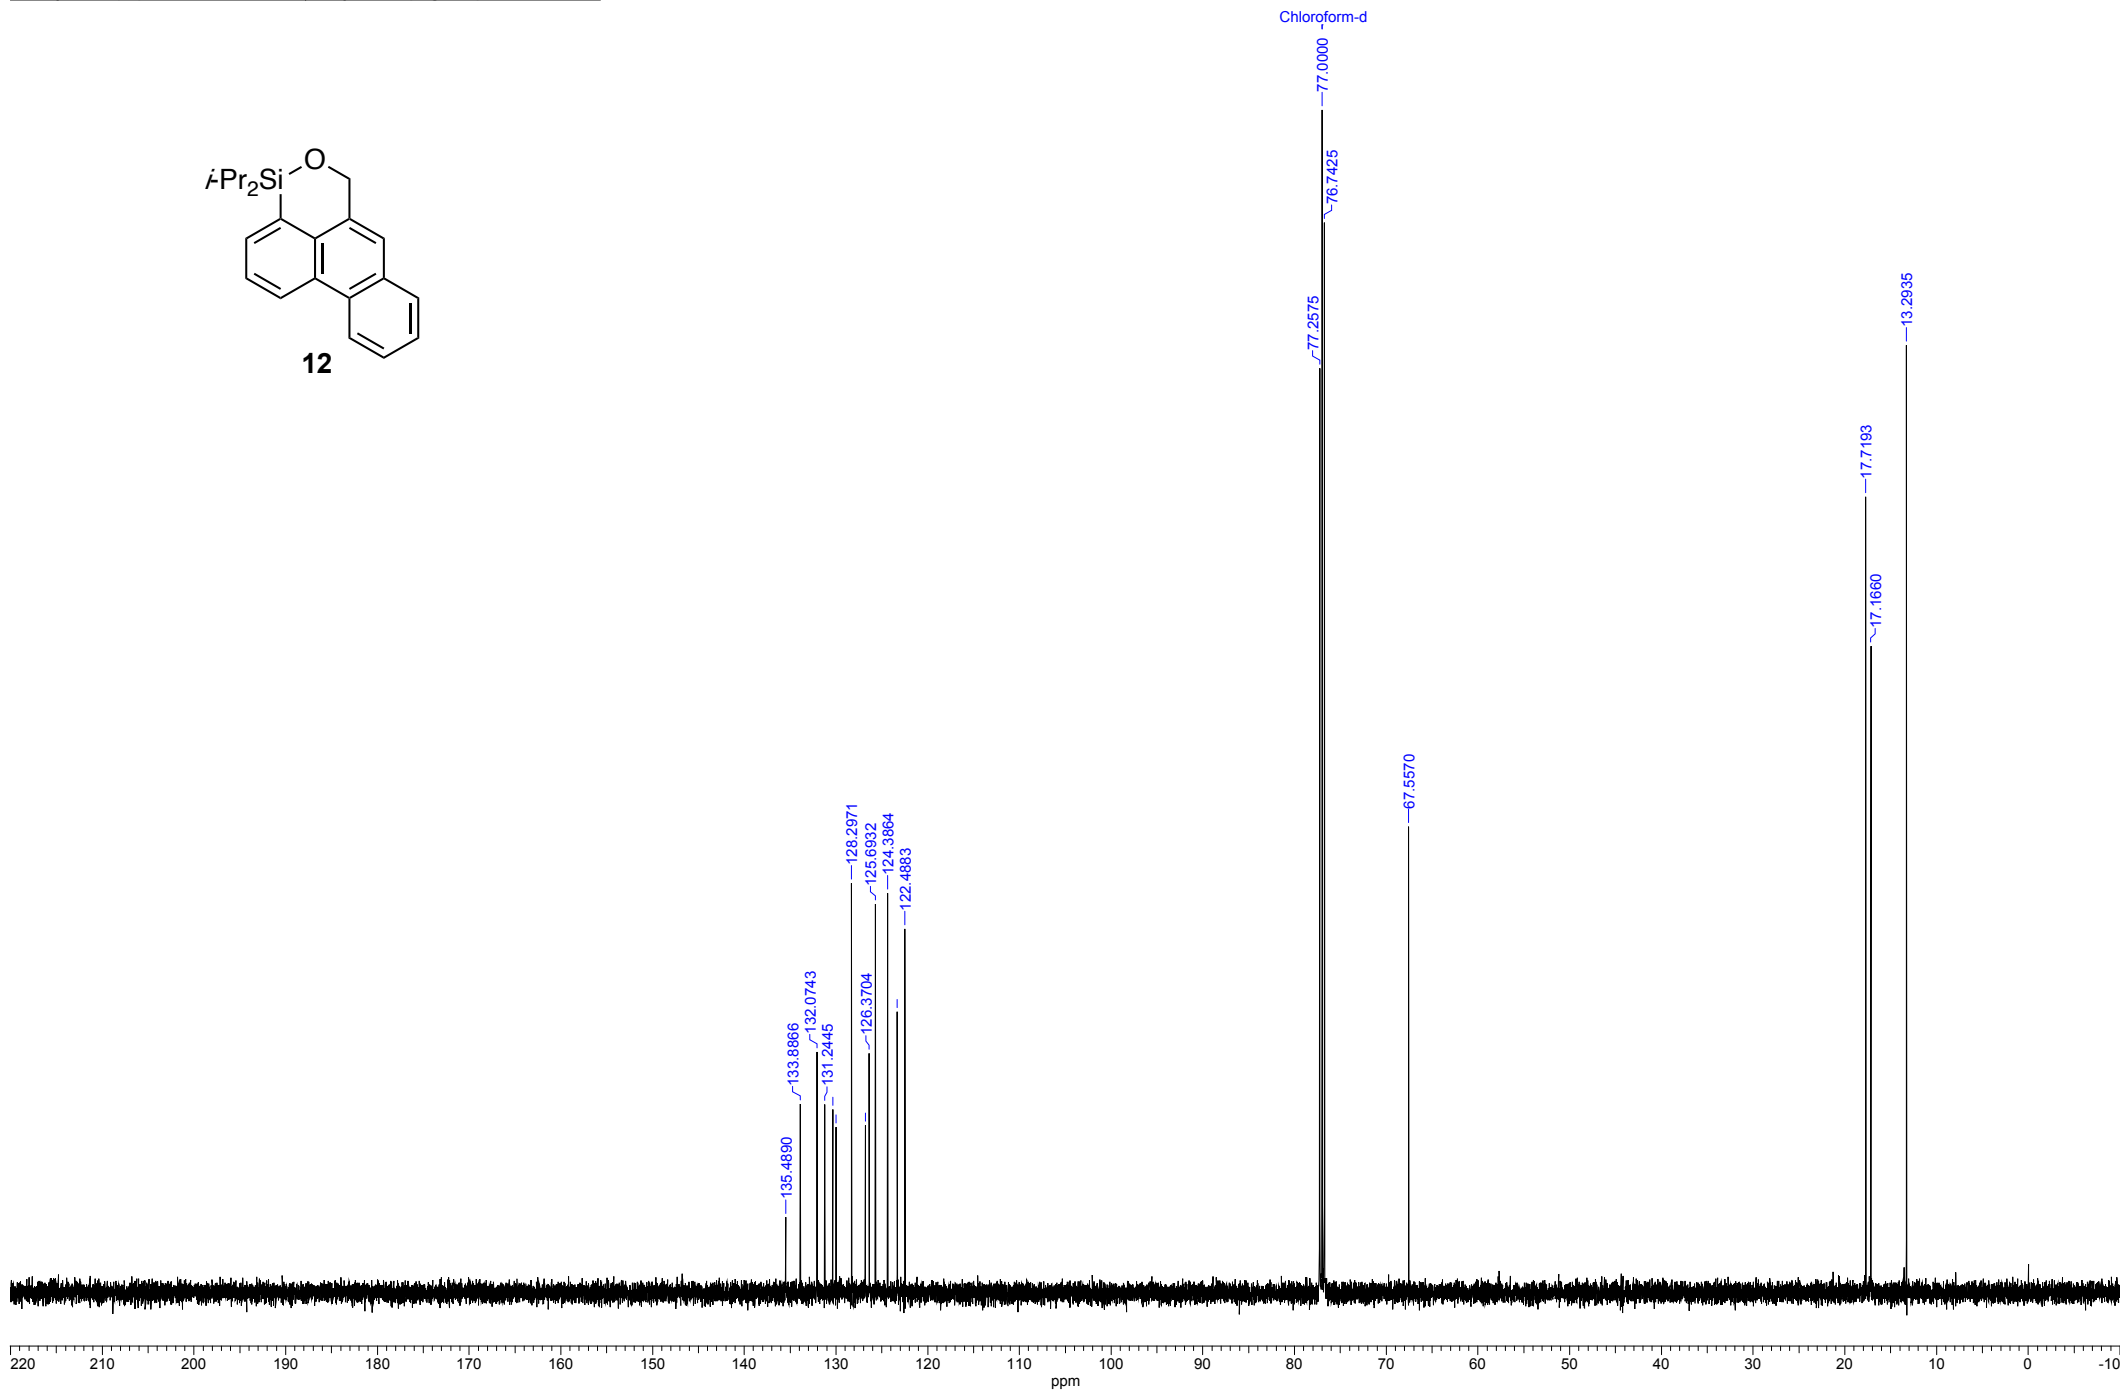

|                        |         |                        |              |                       |                      |              |                                                |                 |              |
|------------------------|---------|------------------------|--------------|-----------------------|----------------------|--------------|------------------------------------------------|-----------------|--------------|
| Acquisition Time (sec) | 1.4524  | Comment                | single pulse | Date                  | 03 Jul 2020 02:29:02 | File Name    | F:\NMR CE t H \tawatari\TT0470-1H proton-1.als | Frequency (MHz) | 600.00       |
| Nucleus                | 1H      | Number of Transients   | 8            | Original Points Count | 13107                | Points Count | 13107                                          | Pulse Sequence  | proton.jxp   |
| Sweep Width (Hz)       | 9024.44 | Temperature (degree C) | 20.000       |                       |                      |              |                                                | Solvent         | CHLOROFORM-D |

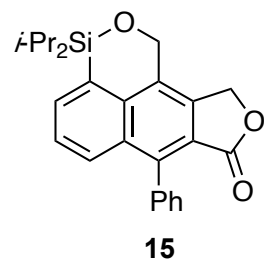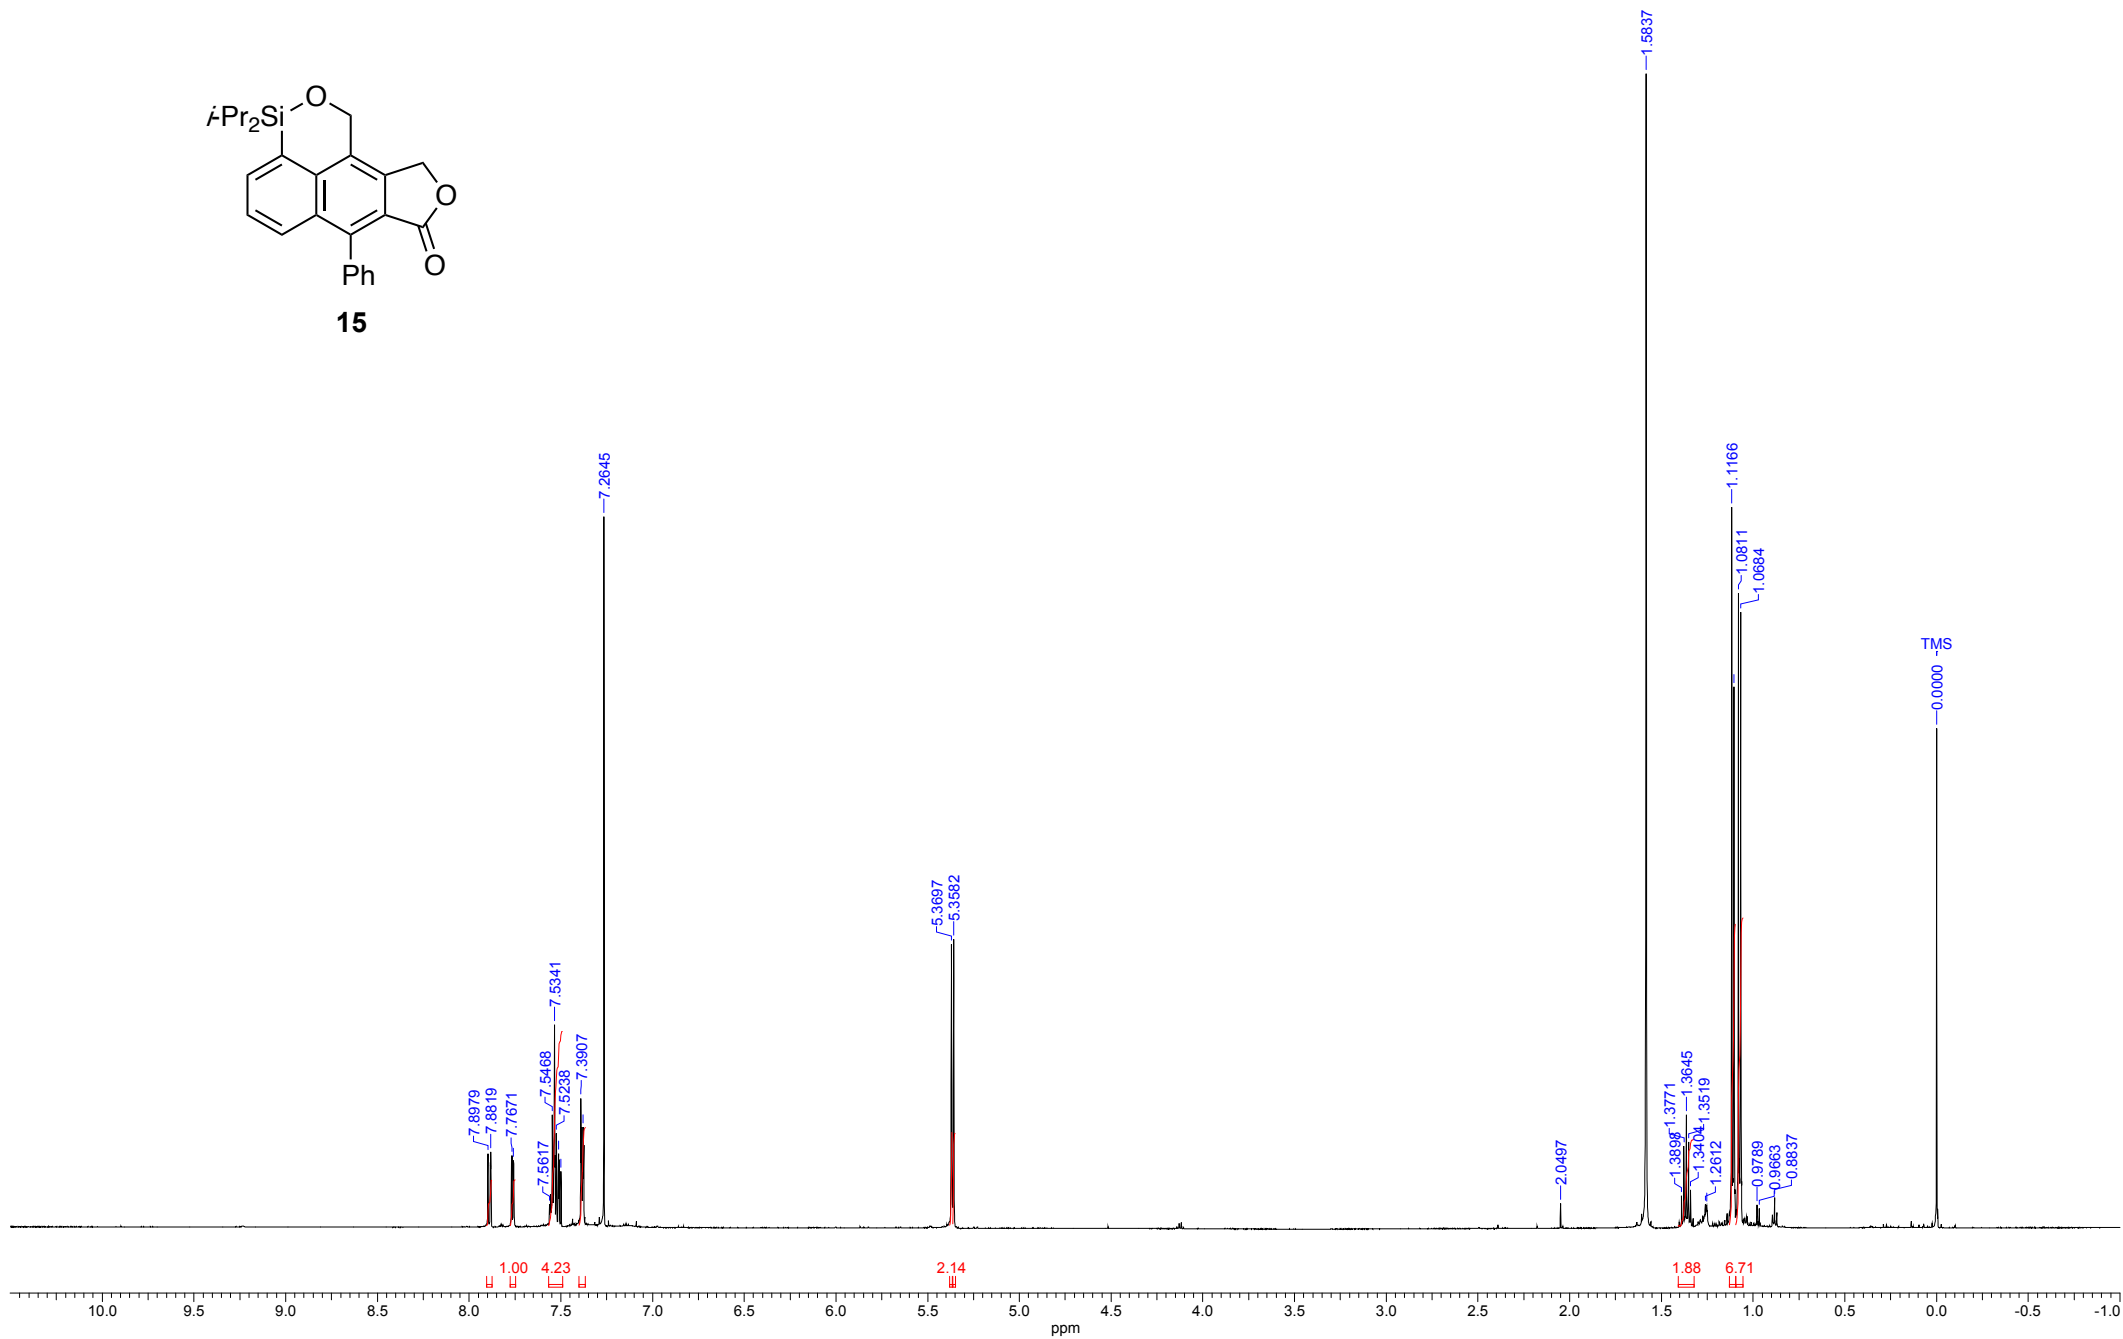

|                        |          |                        |                                  |                       |                      |              |                                                 |                |                 |         |              |
|------------------------|----------|------------------------|----------------------------------|-----------------------|----------------------|--------------|-------------------------------------------------|----------------|-----------------|---------|--------------|
| Acquisition Time (sec) | 0.6921   | Comment                | single pulse decoupled gated NOE | Date                  | 03 Jul 2020 02:29:26 | File Name    | F:\NMR CE t H \tawatari\TT0470-13C carbon-1.als |                |                 |         |              |
| Frequency (MHz)        | 150.00   | Number of Transients   | 401                              | Original Points Count | 26214                | Points Count | 26214                                           | Pulse Sequence | carbon_cool.jxp | Solvent | CHLOROFORM-D |
| Sweep Width (Hz)       | 37876.77 | Temperature (degree C) | 20.000                           |                       |                      |              |                                                 |                |                 |         |              |

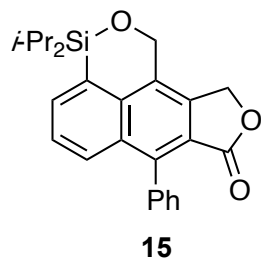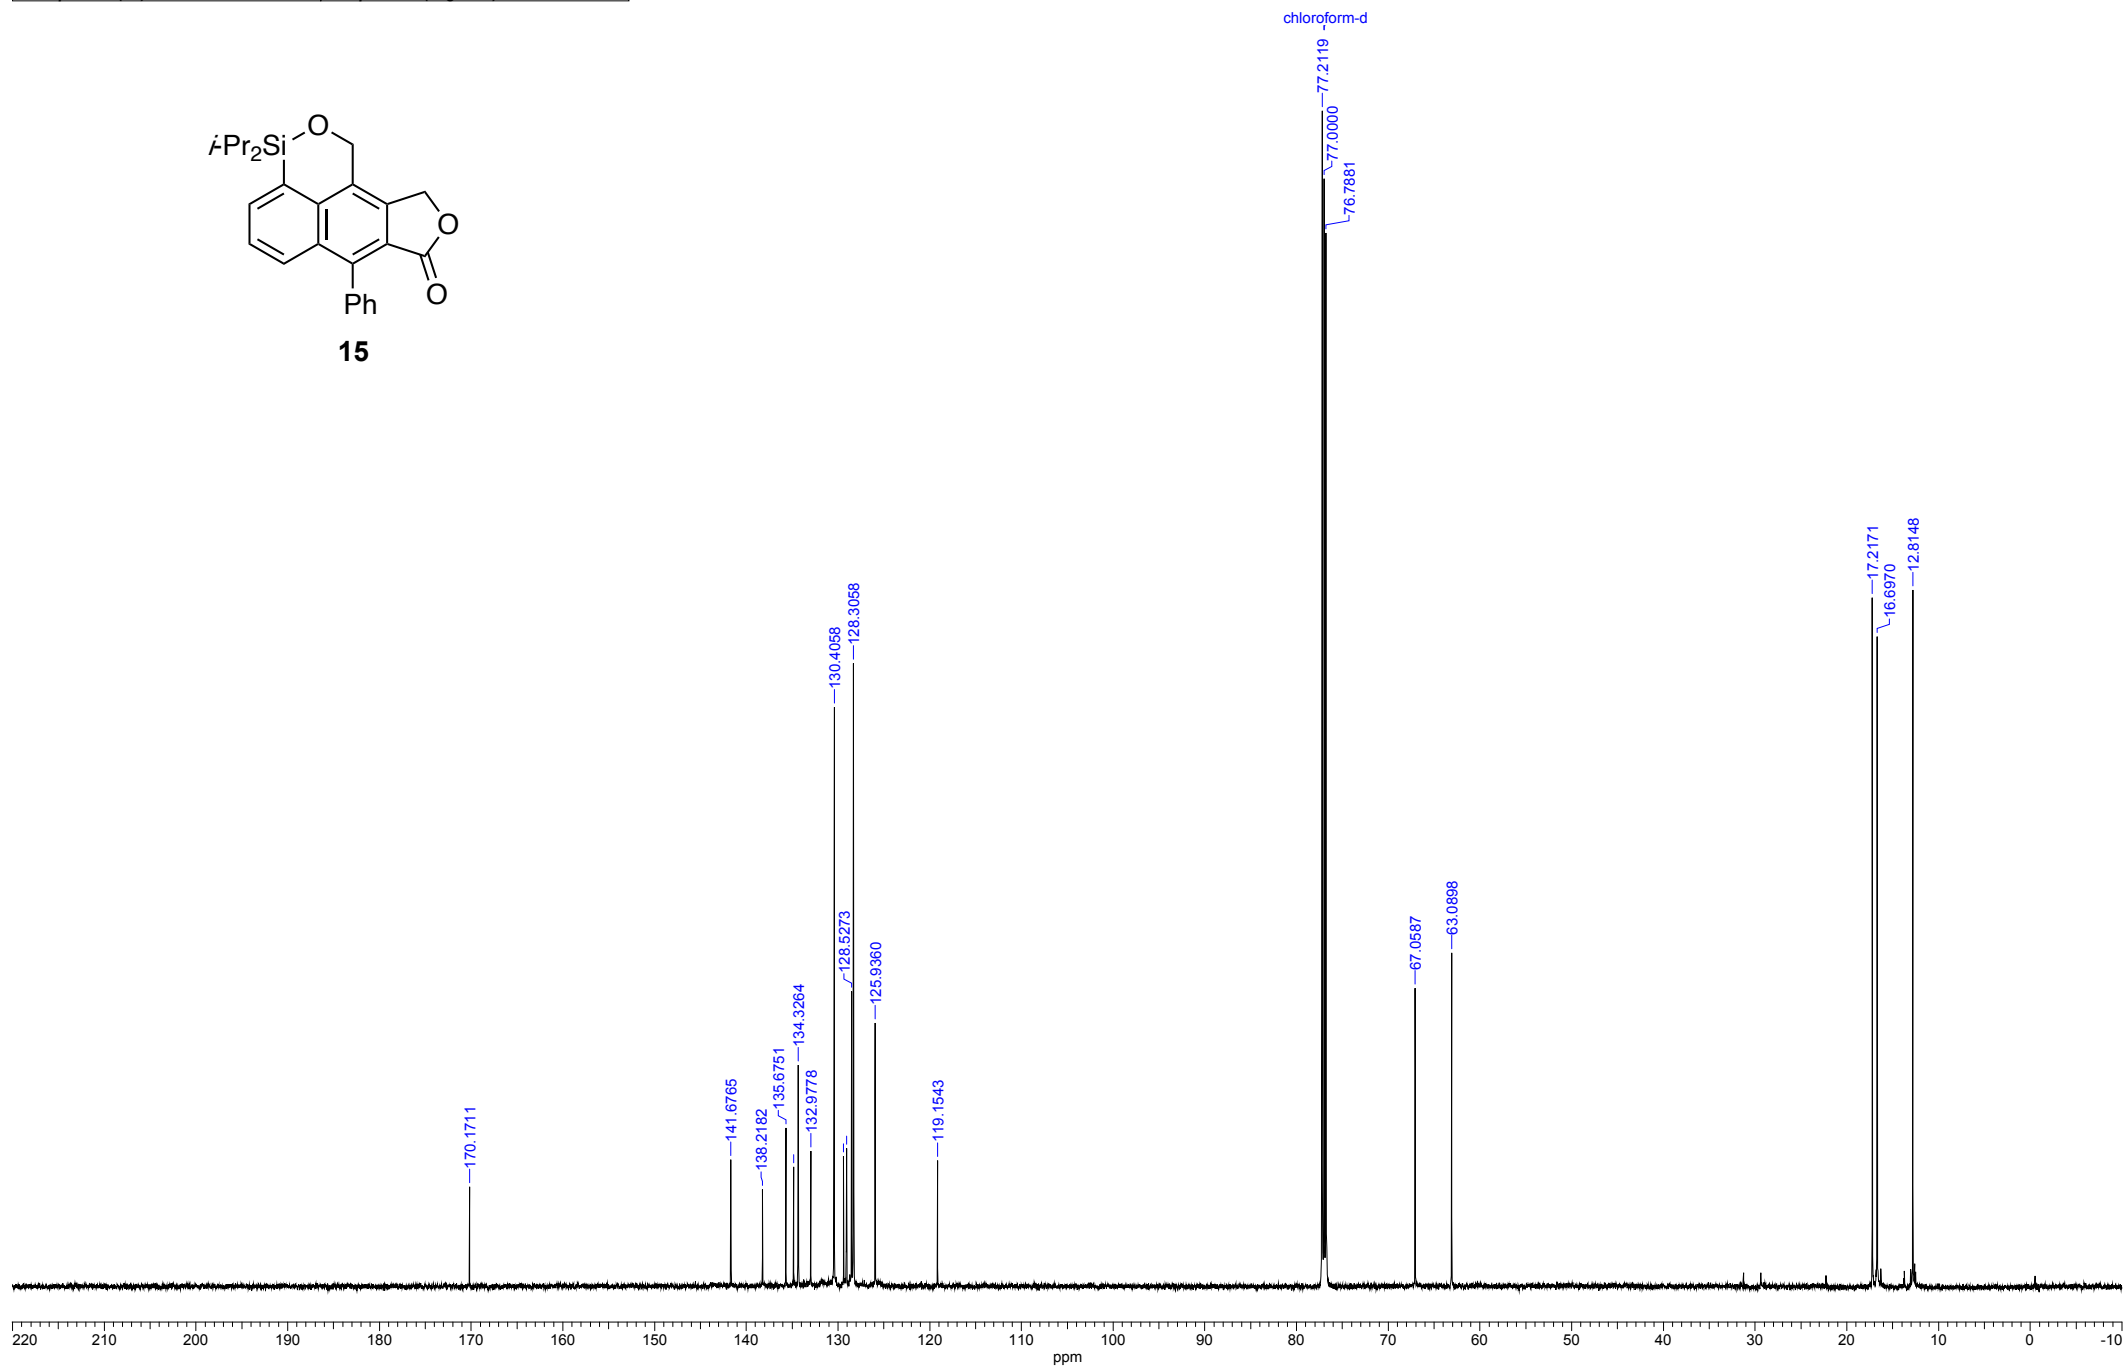

|                        |         |                        |              |                       |                      |              |                                               |                 |            |
|------------------------|---------|------------------------|--------------|-----------------------|----------------------|--------------|-----------------------------------------------|-----------------|------------|
| Acquisition Time (sec) | 1.8153  | Comment                | single pulse | Date                  | 13 Sep 2021 22:28:40 | File Name    | F:\NMR CE t H \tawatari\TT0905_proton-1-1.als | Frequency (MHz) | 600.17     |
| Nucleus                | 1H      | Number of Transients   | 8            | Original Points Count | 16384                | Points Count | 13120                                         | Pulse Sequence  | proton.jxp |
| Sweep Width (Hz)       | 9025.27 | Temperature (degree C) | 20.600       |                       |                      | Solvent      | CHLOROFORM-D                                  |                 |            |

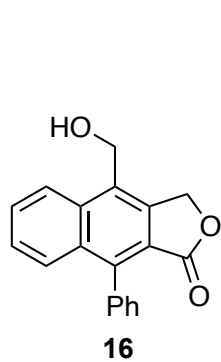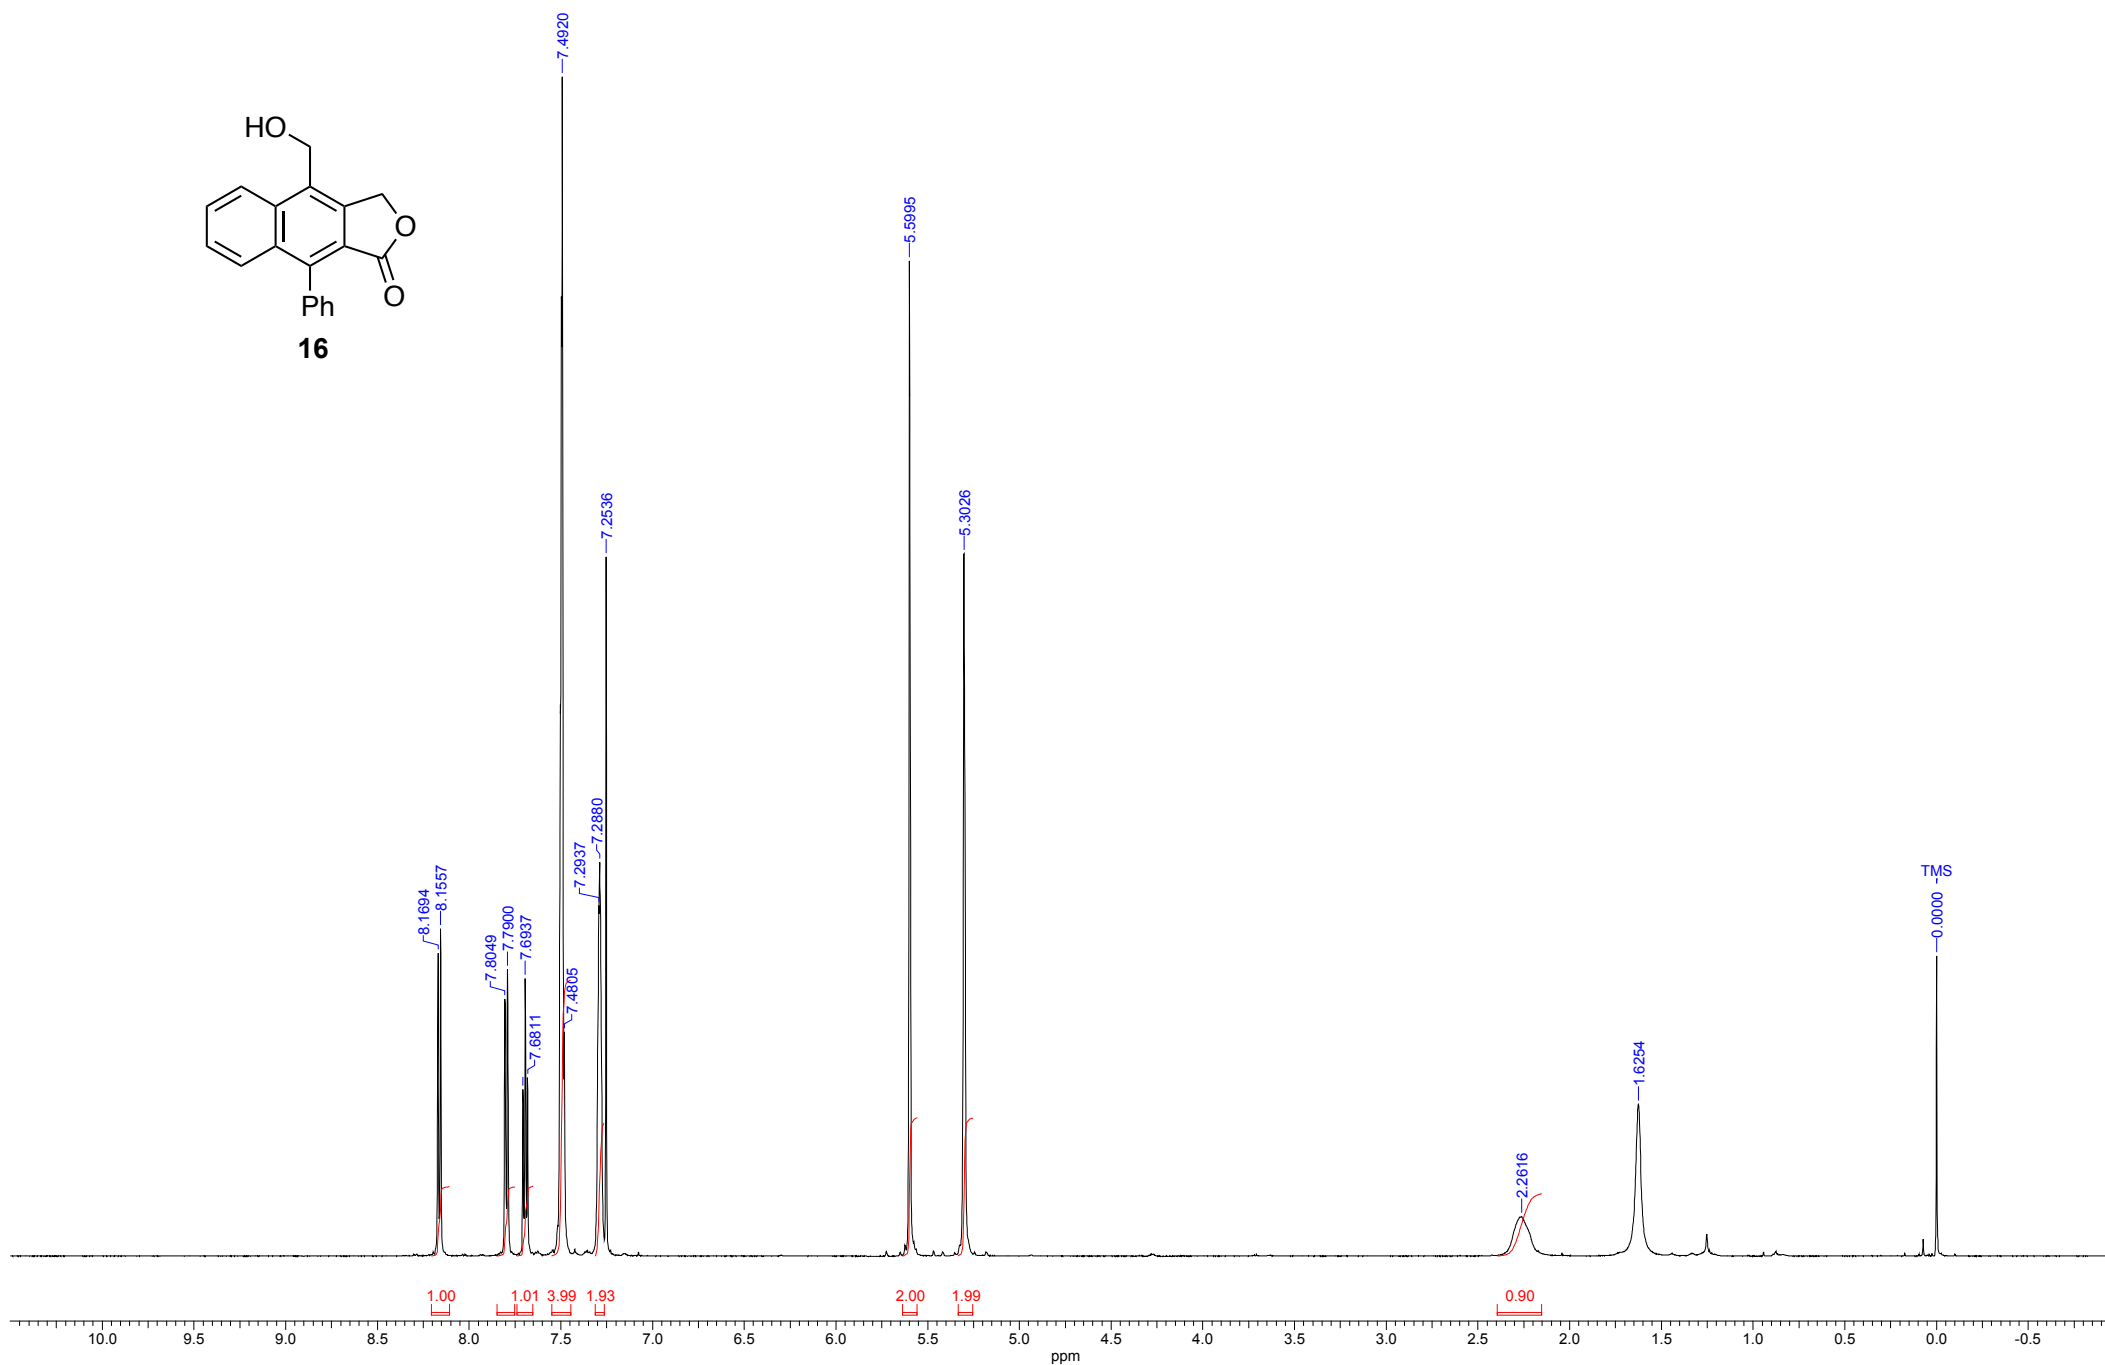

|                        |          |                        |                                  |              |                      |                |                                            |
|------------------------|----------|------------------------|----------------------------------|--------------|----------------------|----------------|--------------------------------------------|
| Acquisition Time (sec) | 0.6921   | Comment                | single pulse decoupled gated NOE | Date         | 13 Sep 2021 22:28:22 | File Name      | F:\NMR CE t H \tawatar\TT0905 carbon-1.als |
| Frequency (MHz)        | 150.00   | Number of Transients   | 1024                             | Points Count | 26214                | Pulse Sequence | carbon_cool.jxp                            |
| Sweep Width (Hz)       | 37876.77 | Temperature (degree C) | 20.500                           |              |                      | Solvent        | CHLOROFORM-D                               |

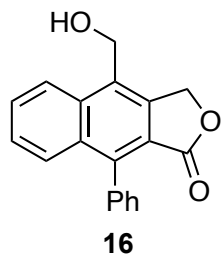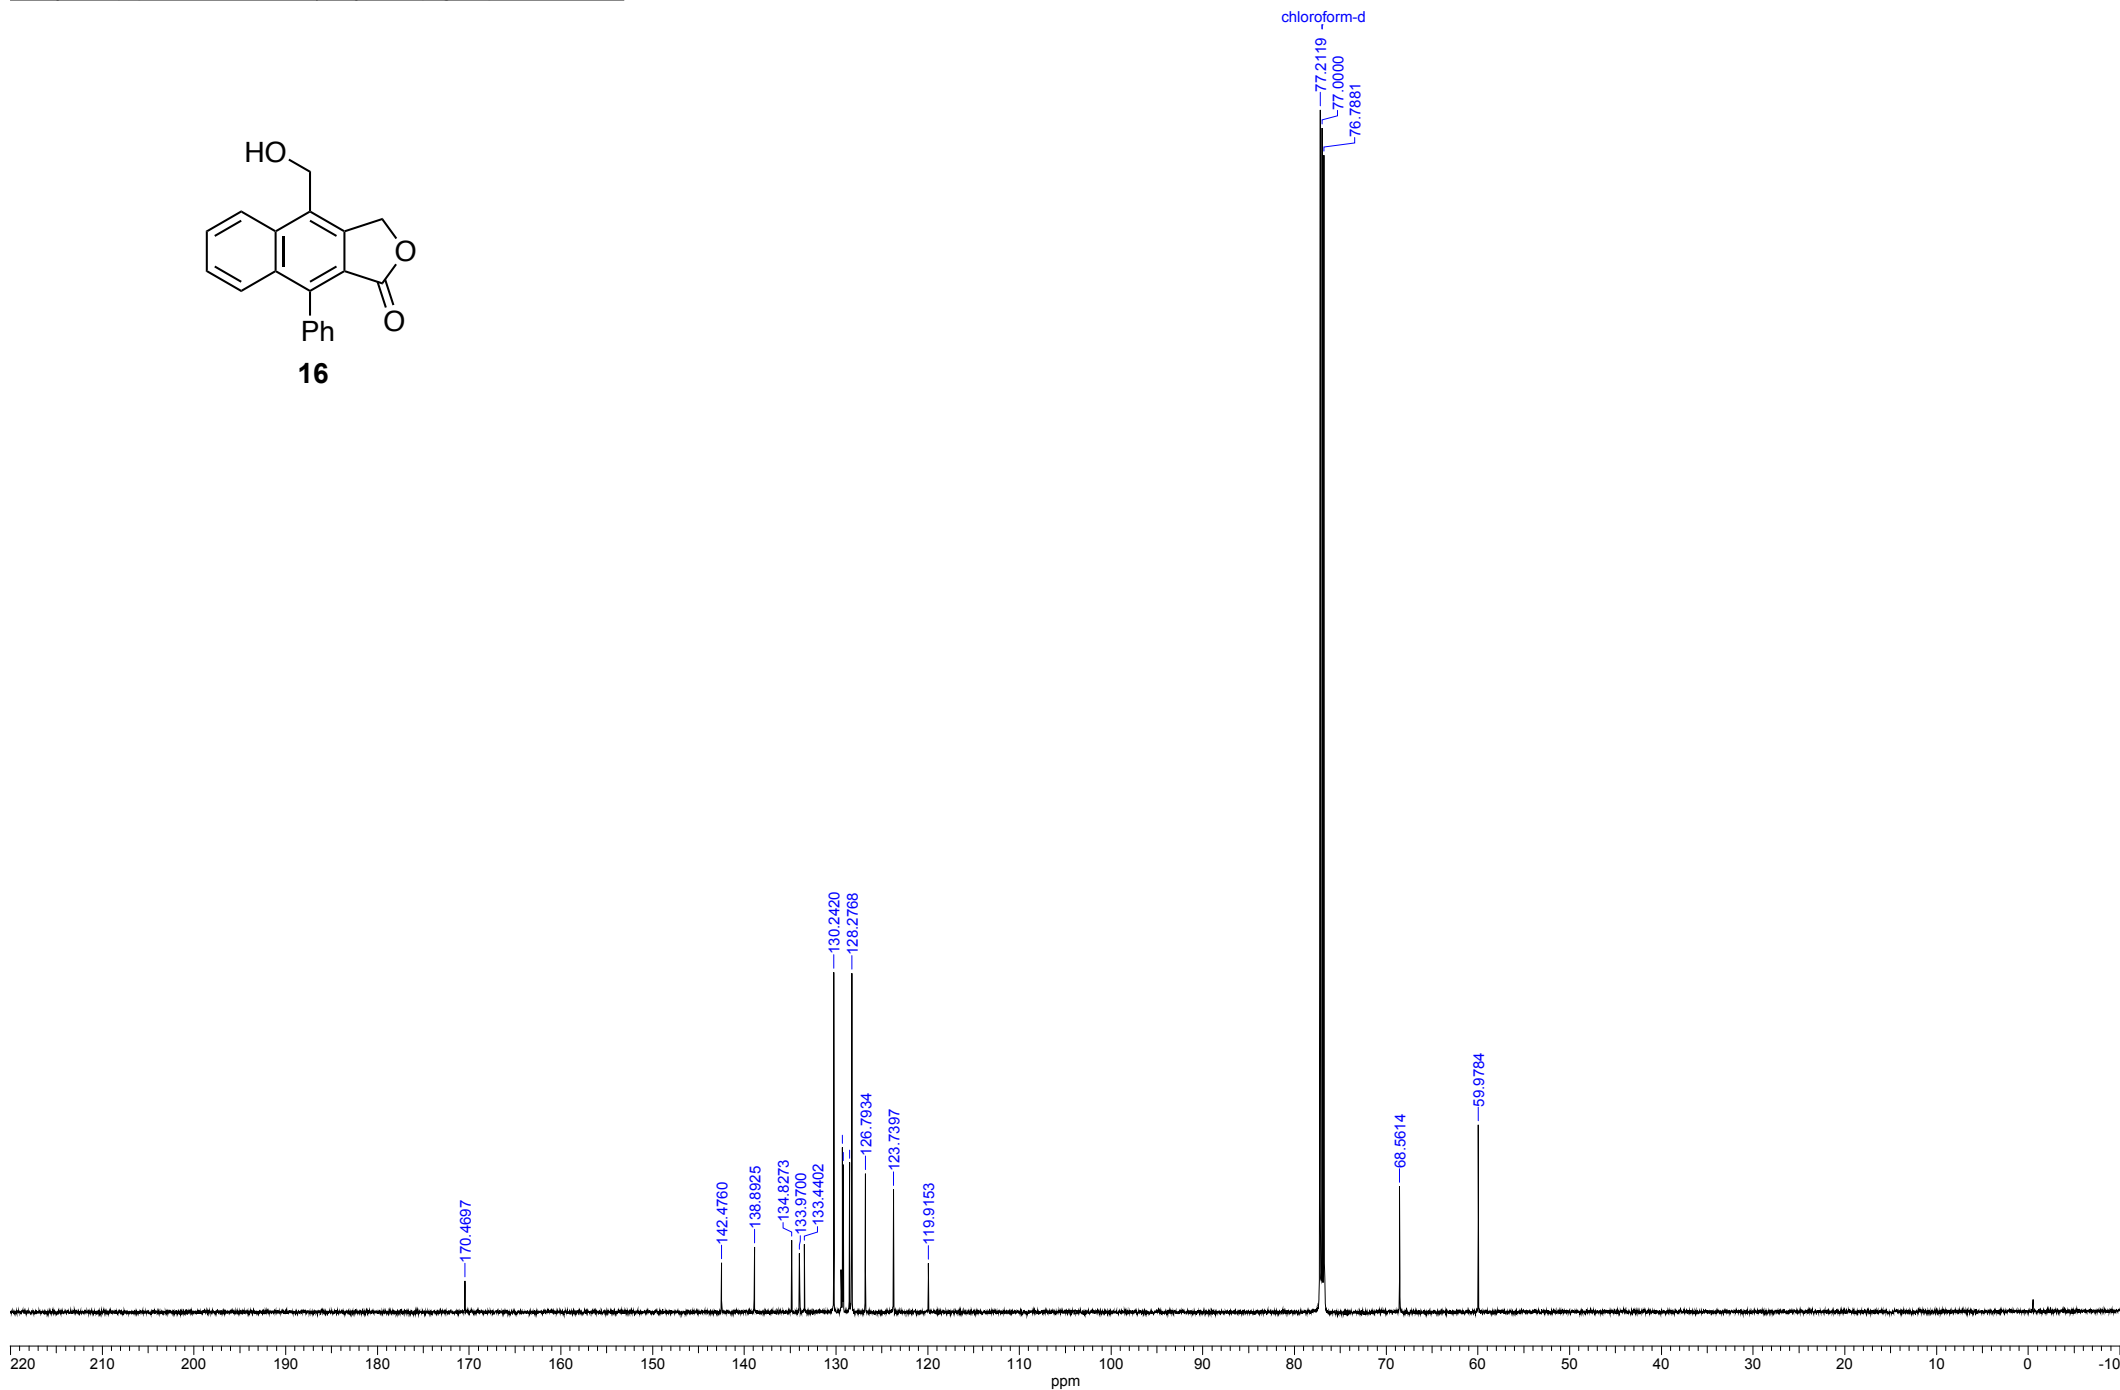

Supplement: d1cc05264k1.pdf [file d1cc05264k1.pdf]
